# Supplementary material for: Brahmin Left Versus Merchant Right: Changing Political Cleavages in 21 Western Democracies, 1948–2020
Source: Oxford University Press journal article supplement (doi:10.1093/qje/qjab036), 2021-09-30
Supplement: qjab036_online_appendix.pdf [file qjab036_online_appendix.pdf]

**Brahmin Left versus Merchant Right: Changing Political Cleavages in 21 Western Democracies, 1948-2020\***

Amory Gethin

Clara Martínez-Toledano

Thomas Piketty

July 2021

**APPENDIX**

This appendix supplements our paper “Brahmin Left versus Merchant Right: Changing Political Cleavages in 21 Western Democracies, 1948-2020”. It contains additional methodological details, as well as supplementary figures and tables.

---

\* Amory Gethin, Thomas Piketty: Paris School of Economics – World Inequality Lab; Clara Martínez-Toledano: Imperial College London – World Inequality Lab.

This appendix supplements our paper “Brahmin Left versus Merchant Right: Changing Political Cleavages in Western Democracies, 1948-2020”. Appendix A presents the methodology used to derive quantile groups from discrete categories. Appendix B contains supplementary figures and tables.

*Appendix A. Estimation of quantile groups from discrete categories*

One of the contributions of this paper is to provide data on the vote share received by specific parties and coalitions by income and education groups, decomposing for instance the population into its poorest or least educated half (the bottom 50%), the next 40% (the middle 40%), and the highest decile (the top 10%). Such groups are key to track political cleavages over time and compare them across countries. The problem is that existing surveys do not provide continuous values for income or education: these variables are most often coded in discrete categories (educational levels in the case of education, income brackets in the case of income).

To partially overcome this issue, we introduce a simple reweighing method, which exploits the distribution of individuals in each bracket or category to approximate quantiles. Consider for example the 2015 Canadian Election Study, which contains an income variable coded in eighteen brackets (see table 1). One is interested in computing the proportion of individuals belonging to the lowest income decile voting for the New Democratic Party  $\bar{y}_{\{d=1\}}$ , where  $y$  is a binary variable taking 1 if the respondent voted for the NDP and 0 otherwise, and where  $d$  refers to the income decile to which the respondents belong. Unfortunately, this is not directly possible with this income variable since only 5% of individuals belong to the first income bracket ( $b = 1$ ), and 15.5% of them belong to the lowest two brackets ( $b \in [1,2]$ ). If support for the NDP decreases linearly with income, then  $\bar{y}_{\{b=1\}}$  will strongly overestimate  $\bar{y}_{\{d=1\}}$ , while  $\bar{y}_{\{b=2\}}$  will strongly underestimate it since we are looking at individuals who are on average too poor in the first case and too rich in the second. However, it is easy to see that since individuals within the second bracket range from quantiles 0.05 to 0.155, this means that  $\frac{0.05}{0.155-0.05} \approx 48\%$  of them belong to the bottom 10%, while 52% of them belong to the rest of the population, assuming for simplicity that individuals within brackets are uniformly distributed.

**Table 1 - Reweighting categories to approximate quantiles: example for income brackets in Canada, 2015**

| Bracket number | Frequency range | Decile-specific reweighting factor |     |     |     |     |     |     |     |     |     |     |   |  |  |  |  |  |  |  |
|----------------|-----------------|------------------------------------|-----|-----|-----|-----|-----|-----|-----|-----|-----|-----|---|--|--|--|--|--|--|--|
|                |                 | 1                                  | 2   | 3   | 4   | 5   | 6   | 7   | 8   | 9   | 10  |     |   |  |  |  |  |  |  |  |
| 1              | 0.000 - 0.050   | 1                                  |     |     |     |     |     |     |     |     |     |     |   |  |  |  |  |  |  |  |
| 2              | 0.050 - 0.155   | .48                                | .52 |     |     |     |     |     |     |     |     |     |   |  |  |  |  |  |  |  |
| 3              | 0.155 - 0.201   |                                    | .97 | .03 |     |     |     |     |     |     |     |     |   |  |  |  |  |  |  |  |
| 4              | 0.201 - 0.253   |                                    |     | 1   |     |     |     |     |     |     |     |     |   |  |  |  |  |  |  |  |
| 5              | 0.253 - 0.309   |                                    |     | .84 | .16 |     |     |     |     |     |     |     |   |  |  |  |  |  |  |  |
| 6              | 0.309 - 0.355   |                                    |     |     | 1   |     |     |     |     |     |     |     |   |  |  |  |  |  |  |  |
| 7              | 0.355 - 0.478   |                                    |     |     | .36 | .64 |     |     |     |     |     |     |   |  |  |  |  |  |  |  |
| 8              | 0.478 - 0.529   |                                    |     |     |     | .43 | .57 |     |     |     |     |     |   |  |  |  |  |  |  |  |
| 9              | 0.529 - 0.554   |                                    |     |     |     |     | 1   |     |     |     |     |     |   |  |  |  |  |  |  |  |
| 10             | 0.554 - 0.599   |                                    |     |     |     |     | 1   |     |     |     |     |     |   |  |  |  |  |  |  |  |
| 11             | 0.599 - 0.652   |                                    |     |     |     |     | .02 | .98 |     |     |     |     |   |  |  |  |  |  |  |  |
| 12             | 0.652 - 0.734   |                                    |     |     |     |     |     | .59 | .41 |     |     |     |   |  |  |  |  |  |  |  |
| 13             | 0.734 - 0.767   |                                    |     |     |     |     |     |     | 1   |     |     |     |   |  |  |  |  |  |  |  |
| 14             | 0.767 - 0.807   |                                    |     |     |     |     |     |     | .82 | .18 |     |     |   |  |  |  |  |  |  |  |
| 15             | 0.807 - 0.876   |                                    |     |     |     |     |     |     |     | 1   |     |     |   |  |  |  |  |  |  |  |
| 16             | 0.876 - 0.902   |                                    |     |     |     |     |     |     |     |     | .92 | .08 |   |  |  |  |  |  |  |  |
| 17             | 0.902 - 0.973   |                                    |     |     |     |     |     |     |     |     |     | 1   |   |  |  |  |  |  |  |  |
| 18             | 0.973 - 1.000   |                                    |     |     |     |     |     |     |     |     |     |     | 1 |  |  |  |  |  |  |  |

*Note:* author's computations based on the 2015 Canadian Election Study. *Interpretation:* individuals belonging to the second income bracket represent 10% of the population and are located above the 5% poorest individuals, but within the 15.5% poorest. Assuming that individuals' incomes are uniformly distributed within this income bracket, this implies that 48% of them belong to bottom 10% earners and 52% of them are in the second income decile. To approximate the mean of a variable  $y$  for individuals within the first decile of income, one can therefore give a weight of 1 to those in the first bracket, a weight of 0.48 to those in the second bracket, and compute the weighed mean of  $y$  over these individuals.

Therefore, a reasonable approximation of the vote share received by the NDP among bottom 10% earners is a weighed average of vote shares in the two brackets:

$$\bar{y}_{\{d=1\}} = \frac{1 \times \bar{y}_{\{b=1\}} + 0.48 \times \bar{y}_{\{b=2\}}}{1 + 0.48}$$

This estimator is consistent, assuming that the average value taken by the dependent variable is constant within brackets. In practice, however, it does make sense to believe that the vote shares vary also within brackets in the same direction as observed between them. Therefore, this approximation should be considered as a lower bound of the true effect. Still, this method

clearly does much better than computing deciles or quintiles directly from brackets – which could in fact not be quantile groups given that frequencies would necessarily be imbalanced.

**Figure 1 - From brackets to deciles: vote for the New Democratic Party by income group in Canada, 2015**

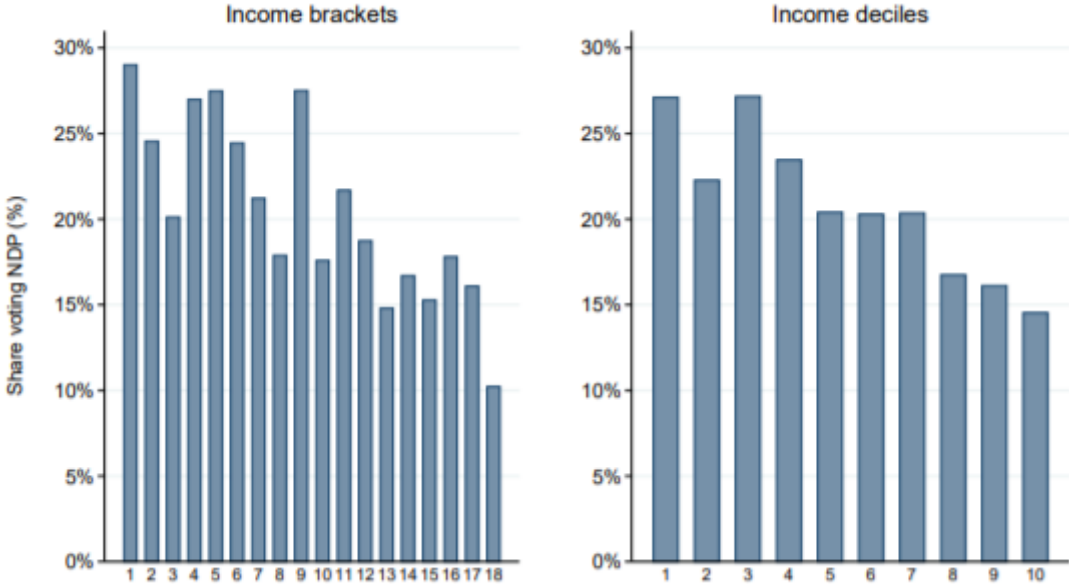

Figure 1 shows the results obtained when computing vote shares for the New Democratic Party in the 2015 Canadian national election. Unsurprisingly, the two pictures look very similar, since computing vote shares by decile amounts to computing weighed averages across income brackets.

Another interesting aspect of this method is that it enables us to control for structural changes not only in income, but also in other ordered variables such as education, wealth or even rural-urban scales. If university graduates were originally 5% in the 1960s and increased up to 30% in the 2010s, for instance, then one can exploit detailed educational categories to approximate “top 10% educated voters”. In the 1960s, this category is composed of both university graduates and some secondary educated voters; in the 2010s, it gives more weight to individuals with masters or PhDs. This is what we do throughout the paper.

Finally, one issue is that ‘splitting’ brackets into deciles implies that a single individual may belong to different quantile groups: in the example above, individuals in bracket 2 belong both to the first and the second deciles. While this is not problematic when computing averages, it makes regression models impossible to solve: without changing the dataset, one cannot compare the vote shares of the first and second decile with control variables.

To solve this problem, we expand the entire dataset as many times as the number of quantile groups required. In the case of deciles, for instance, the procedure consists in duplicating all observations ten times. Then, one simply needs to attribute the corresponding weights to duplicated individuals: individuals belonging to bracket 2 see their sample weight multiplied by 0.48 in their first observation, 0.52 in the second time they appear in the dataset, and 0 in all other instances. Since this process only reweighs individuals, it leaves the effect of other explanatory variables perfectly unchanged. Finally, to account for correlation of the outcome variable of interest across duplicated observations, we cluster standard errors by individual.

*Appendix B. Supplementary figures and tables*

**Table A1 - Data sources**

| <b>Country</b> | <b>Election</b> | <b>Source</b>                                                          |
|----------------|-----------------|------------------------------------------------------------------------|
| Australia      | 1966            | International Social Mobility and Politics File (Franklin et al. 1992) |
| Australia      | 1972            | International Social Mobility and Politics File (Franklin et al. 1992) |
| Australia      | 1977            | International Social Mobility and Politics File (Franklin et al. 1992) |
| Australia      | 1983            | International Social Mobility and Politics File (Franklin et al. 1992) |
| Australia      | 1984            | International Social Mobility and Politics File (Franklin et al. 1992) |
| Australia      | 1987            | Australian Election Study                                              |
| Australia      | 1990            | Australian Election Study                                              |
| Australia      | 1993            | Australian Election Study                                              |
| Australia      | 1996            | Australian Election Study                                              |
| Australia      | 1998            | Australian Election Study                                              |
| Australia      | 2001            | Australian Election Study                                              |
| Australia      | 2004            | Australian Election Study                                              |
| Australia      | 2007            | Australian Election Study                                              |
| Australia      | 2010            | Australian Election Study                                              |
| Australia      | 2013            | Australian Election Study                                              |
| Australia      | 2016            | Australian Election Study                                              |
| Australia      | 2019            | Australian Election Study                                              |
| Austria        | 1971            | International Social Mobility and Politics File (Franklin et al. 1992) |
| Austria        | 1983            | International Social Mobility and Politics File (Franklin et al. 1992) |
| Austria        | 1986            | International Social Mobility and Politics File (Franklin et al. 1992) |
| Austria        | 1994            | Eurobarometers                                                         |
| Austria        | 1995            | Eurobarometers                                                         |
| Austria        | 1999            | Eurobarometers                                                         |
| Austria        | 2002            | European Social Survey                                                 |
| Austria        | 2006            | European Social Survey                                                 |
| Austria        | 2013            | Comparative Study of Electoral Systems (CSES)                          |
| Austria        | 2017            | Comparative Study of Electoral Systems (CSES)                          |
| Belgium        | 1971            | Eurobarometers                                                         |
| Belgium        | 1974            | Eurobarometers                                                         |
| Belgium        | 1977            | Eurobarometers                                                         |
| Belgium        | 1978            | Eurobarometers                                                         |
| Belgium        | 1981            | Eurobarometers                                                         |
| Belgium        | 1985            | Eurobarometers                                                         |
| Belgium        | 1987            | Eurobarometers                                                         |
| Belgium        | 1991            | Belgium General Election Study                                         |
| Belgium        | 1995            | Belgium General Election Study                                         |
| Belgium        | 1999            | Belgium General Election Study                                         |
| Belgium        | 2003            | European Social Survey                                                 |
| Belgium        | 2007            | European Social Survey                                                 |
| Belgium        | 2010            | European Social Survey                                                 |
| Belgium        | 2014            | European Social Survey                                                 |
| Canada         | 1963            | Canadian Election Studies                                              |
| Canada         | 1965            | Canadian Election Studies                                              |
| Canada         | 1968            | Canadian Election Studies                                              |
| Canada         | 1974            | Canadian Election Studies                                              |

|         |      |                                   |
|---------|------|-----------------------------------|
| Canada  | 1979 | Canadian Election Studies         |
| Canada  | 1980 | Canadian Election Studies         |
| Canada  | 1984 | Canadian Election Studies         |
| Canada  | 1988 | Canadian Election Studies         |
| Canada  | 1993 | Canadian Election Studies         |
| Canada  | 1997 | Canadian Election Studies         |
| Canada  | 2000 | Canadian Election Studies         |
| Canada  | 2004 | Canadian Election Studies         |
| Canada  | 2006 | Canadian Election Studies         |
| Canada  | 2008 | Canadian Election Studies         |
| Canada  | 2011 | Canadian Election Studies         |
| Canada  | 2015 | Canadian Election Studies         |
| Canada  | 2019 | Canadian Election Studies         |
| Denmark | 1960 | Danish Election Study             |
| Denmark | 1964 | Danish Election Study             |
| Denmark | 1966 | Danish Election Study             |
| Denmark | 1968 | Danish Election Study             |
| Denmark | 1971 | Danish Election Study             |
| Denmark | 1973 | Danish Election Study             |
| Denmark | 1975 | Danish Election Study             |
| Denmark | 1977 | Danish Election Study             |
| Denmark | 1979 | Danish Election Study             |
| Denmark | 1981 | Danish Election Study             |
| Denmark | 1984 | Danish Election Study             |
| Denmark | 1987 | Danish Election Study             |
| Denmark | 1988 | Danish Election Study             |
| Denmark | 1990 | Danish Election Study             |
| Denmark | 1994 | Danish Election Study             |
| Denmark | 1998 | Danish Election Study             |
| Denmark | 2001 | Danish Election Study             |
| Denmark | 2005 | Danish Election Study             |
| Denmark | 2007 | Danish Election Study             |
| Denmark | 2011 | Danish Election Study             |
| Denmark | 2015 | Danish Election Study             |
| Finland | 1972 | Finnish Voter Barometers          |
| Finland | 1975 | Finnish Voter Barometers          |
| Finland | 1979 | Finnish Voter Barometers          |
| Finland | 1983 | Finnish Voter Barometers          |
| Finland | 1987 | Finnish Voter Barometers          |
| Finland | 1995 | Finnish Voter Barometers          |
| Finland | 1999 | Finnish Voter Barometers          |
| Finland | 2003 | Finnish Voter Barometers          |
| Finland | 2007 | Finnish National Election Studies |
| Finland | 2011 | Finnish National Election Studies |
| Finland | 2015 | Finnish National Election Studies |
| France  | 1956 | French Election Studies           |
| France  | 1958 | French Election Studies           |
| France  | 1962 | French Election Studies           |
| France  | 1965 | French Election Studies           |
| France  | 1967 | French Election Studies           |

|         |      |                                     |
|---------|------|-------------------------------------|
| France  | 1973 | French Election Studies             |
| France  | 1974 | French Election Studies             |
| France  | 1978 | French Election Studies             |
| France  | 1986 | French Election Studies             |
| France  | 1988 | French Election Studies             |
| France  | 1993 | French Election Studies             |
| France  | 1995 | French Election Studies             |
| France  | 1997 | French Election Studies             |
| France  | 2002 | French Election Studies             |
| France  | 2007 | French Election Studies             |
| France  | 2012 | French Election Studies             |
| France  | 2017 | French election studies             |
| Germany | 1949 | German Federal Election Studies     |
| Germany | 1953 | German Federal Election Studies     |
| Germany | 1957 | German Federal Election Studies     |
| Germany | 1961 | German Federal Election Studies     |
| Germany | 1965 | German Federal Election Studies     |
| Germany | 1969 | German Federal Election Studies     |
| Germany | 1972 | German Federal Election Studies     |
| Germany | 1976 | German Federal Election Studies     |
| Germany | 1980 | German Federal Election Studies     |
| Germany | 1983 | German Federal Election Studies     |
| Germany | 1987 | German Federal Election Studies     |
| Germany | 1990 | German Federal Election Studies     |
| Germany | 1994 | German Federal Election Studies     |
| Germany | 1998 | German Federal Election Studies     |
| Germany | 2002 | German Federal Election Studies     |
| Germany | 2005 | German Federal Election Studies     |
| Germany | 2009 | German Federal Election Studies     |
| Germany | 2013 | German Federal Election Studies     |
| Germany | 2017 | German Federal Election Studies     |
| Iceland | 1978 | Icelandic National Election Studies |
| Iceland | 1983 | Icelandic National Election Studies |
| Iceland | 1987 | Icelandic National Election Studies |
| Iceland | 1991 | Icelandic National Election Studies |
| Iceland | 1995 | Icelandic National Election Studies |
| Iceland | 1999 | Icelandic National Election Studies |
| Iceland | 2003 | Icelandic National Election Studies |
| Iceland | 2007 | Icelandic National Election Studies |
| Iceland | 2009 | Icelandic National Election Studies |
| Iceland | 2013 | Icelandic National Election Studies |
| Iceland | 2016 | Icelandic National Election Studies |
| Iceland | 2017 | Icelandic National Election Studies |
| Ireland | 1973 | Eurobarometers                      |
| Ireland | 1977 | Eurobarometers                      |
| Ireland | 1981 | Eurobarometers                      |
| Ireland | 1982 | Eurobarometers                      |
| Ireland | 1987 | Eurobarometers                      |
| Ireland | 1989 | Eurobarometers                      |
| Ireland | 1992 | Eurobarometers                      |



|             |      |                                                                       |
|-------------|------|-----------------------------------------------------------------------|
| Ireland     | 1997 | Eurobarometers                                                        |
| Ireland     | 2002 | European Social Survey                                                |
| Ireland     | 2007 | European Social Survey                                                |
| Ireland     | 2011 | European Social Survey                                                |
| Ireland     | 2016 | European Social Survey                                                |
| Ireland     | 2020 | UCD Online Election Poll                                              |
| Italy       | 1953 | Inter-university Consortium for Political and Social Research (ICPSR) |
| Italy       | 1958 | Inter-university Consortium for Political and Social Research (ICPSR) |
| Italy       | 1968 | Italian National Election Studies                                     |
| Italy       | 1972 | Italian National Election Studies                                     |
| Italy       | 1983 | Italian National Election Studies                                     |
| Italy       | 1987 | Italian National Election Studies                                     |
| Italy       | 1992 | Italian National Election Studies                                     |
| Italy       | 1994 | Italian National Election Studies                                     |
| Italy       | 1996 | Italian National Election Studies                                     |
| Italy       | 2001 | Italian National Election Studies                                     |
| Italy       | 2006 | Comparative Study of Electoral Systems (CSES)                         |
| Italy       | 2008 | Italian National Election Studies                                     |
| Italy       | 2013 | Italian National Election Studies                                     |
| Italy       | 2018 | Italian National Election Studies                                     |
| Luxembourg  | 1974 | Eurobarometers                                                        |
| Luxembourg  | 1979 | Eurobarometers                                                        |
| Luxembourg  | 1984 | Eurobarometers                                                        |
| Luxembourg  | 1989 | Eurobarometers                                                        |
| Luxembourg  | 1994 | Eurobarometers                                                        |
| Luxembourg  | 1999 | Eurobarometers                                                        |
| Luxembourg  | 2004 | European Social Survey                                                |
| Luxembourg  | 2013 | European Election Studies (EES)                                       |
| Luxembourg  | 2018 | European Election Studies (EES)                                       |
| Netherlands | 1967 | Dutch Parliamentary Election Studies                                  |
| Netherlands | 1971 | Dutch Parliamentary Election Studies                                  |
| Netherlands | 1972 | Dutch Parliamentary Election Studies                                  |
| Netherlands | 1977 | Dutch Parliamentary Election Studies                                  |
| Netherlands | 1981 | Dutch Parliamentary Election Studies                                  |
| Netherlands | 1982 | Dutch Parliamentary Election Studies                                  |
| Netherlands | 1986 | Dutch Parliamentary Election Studies                                  |
| Netherlands | 1989 | Dutch Parliamentary Election Studies                                  |
| Netherlands | 1994 | Dutch Parliamentary Election Studies                                  |
| Netherlands | 1998 | Dutch Parliamentary Election Studies                                  |
| Netherlands | 2002 | Dutch Parliamentary Election Studies                                  |
| Netherlands | 2006 | Dutch Parliamentary Election Studies                                  |
| Netherlands | 2010 | Dutch Parliamentary Election Studies                                  |
| Netherlands | 2012 | Dutch Parliamentary Election Studies                                  |
| Netherlands | 2017 | Dutch Parliamentary Election Studies                                  |
| New Zealand | 1972 | New Zealand Election Studies                                          |
| New Zealand | 1975 | New Zealand Election Studies                                          |
| New Zealand | 1978 | New Zealand Election Studies                                          |
| New Zealand | 1981 | New Zealand Election Studies                                          |
| New Zealand | 1984 | New Zealand Election Studies                                          |
| New Zealand | 1987 | New Zealand Election Studies                                          |

|             |      |                                               |
|-------------|------|-----------------------------------------------|
| New Zealand | 1990 | New Zealand Election Studies                  |
| New Zealand | 1993 | New Zealand Election Studies                  |
| New Zealand | 1996 | New Zealand Election Studies                  |
| New Zealand | 1999 | New Zealand Election Studies                  |
| New Zealand | 2002 | New Zealand Election Studies                  |
| New Zealand | 2005 | New Zealand Election Studies                  |
| New Zealand | 2008 | New Zealand Election Studies                  |
| New Zealand | 2011 | New Zealand Election Studies                  |
| New Zealand | 2014 | New Zealand Election Studies                  |
| New Zealand | 2017 | New Zealand Election Studies                  |
| Norway      | 1957 | Norwegian National Election Studies           |
| Norway      | 1965 | Norwegian National Election Studies           |
| Norway      | 1969 | Norwegian National Election Studies           |
| Norway      | 1973 | Norwegian National Election Studies           |
| Norway      | 1977 | Norwegian National Election Studies           |
| Norway      | 1981 | Norwegian National Election Studies           |
| Norway      | 1985 | Norwegian National Election Studies           |
| Norway      | 1989 | Norwegian National Election Studies           |
| Norway      | 1993 | Norwegian National Election Studies           |
| Norway      | 1997 | Norwegian National Election Studies           |
| Norway      | 2001 | Norwegian National Election Studies           |
| Norway      | 2005 | Norwegian National Election Studies           |
| Norway      | 2009 | Norwegian National Election Studies           |
| Norway      | 2013 | Norwegian National Election Studies           |
| Norway      | 2017 | Norwegian National Election Studies           |
| Portugal    | 1983 | ESEO                                          |
| Portugal    | 1985 | ESEO                                          |
| Portugal    | 1987 | ESEO                                          |
| Portugal    | 1991 | ESEO                                          |
| Portugal    | 1995 | European Election Studies (EES)               |
| Portugal    | 2002 | Comparative Study of Electoral Systems (CSES) |
| Portugal    | 2005 | Comparative Study of Electoral Systems (CSES) |
| Portugal    | 2009 | Comparative Study of Electoral Systems (CSES) |
| Portugal    | 2015 | Comparative Study of Electoral Systems (CSES) |
| Portugal    | 2019 | Portuguese Election Study                     |
| Spain       | 1982 | Centro de Investigaciones Sociológicas        |
| Spain       | 1986 | Centro de Investigaciones Sociológicas        |
| Spain       | 1989 | Centro de Investigaciones Sociológicas        |
| Spain       | 1993 | Centro de Investigaciones Sociológicas        |
| Spain       | 1996 | Centro de Investigaciones Sociológicas        |
| Spain       | 2000 | Centro de Investigaciones Sociológicas        |
| Spain       | 2004 | Centro de Investigaciones Sociológicas        |
| Spain       | 2008 | Centro de Investigaciones Sociológicas        |
| Spain       | 2011 | Centro de Investigaciones Sociológicas        |
| Spain       | 2015 | Centro de Investigaciones Sociológicas        |
| Spain       | 2016 | Centro de Investigaciones Sociológicas        |
| Spain       | 2019 | Centro de Investigaciones Sociológicas        |
| Spain       | 2020 | Centro de Investigaciones Sociológicas        |
| Sweden      | 1956 | Swedish National Election Studies             |
| Sweden      | 1958 | Swedish National Election Studies             |

|             |      |                                               |
|-------------|------|-----------------------------------------------|
| Sweden      | 1960 | Swedish National Election Studies             |
| Sweden      | 1964 | Swedish National Election Studies             |
| Sweden      | 1968 | Swedish National Election Studies             |
| Sweden      | 1970 | Swedish National Election Studies             |
| Sweden      | 1973 | Swedish National Election Studies             |
| Sweden      | 1976 | Swedish National Election Studies             |
| Sweden      | 1979 | Swedish National Election Studies             |
| Sweden      | 1982 | Swedish National Election Studies             |
| Sweden      | 1985 | Swedish National Election Studies             |
| Sweden      | 1988 | Swedish National Election Studies             |
| Sweden      | 1991 | Swedish National Election Studies             |
| Sweden      | 1994 | Swedish National Election Studies             |
| Sweden      | 1998 | Swedish National Election Studies             |
| Sweden      | 2002 | Swedish National Election Studies             |
| Sweden      | 2006 | Swedish National Election Studies             |
| Sweden      | 2010 | Swedish National Election Studies             |
| Sweden      | 2014 | Comparative Study of Electoral Systems (CSES) |
| Switzerland | 1967 | Swiss National Election Studies               |
| Switzerland | 1971 | Swiss National Election Studies               |
| Switzerland | 1975 | Swiss National Election Studies               |
| Switzerland | 1979 | Swiss National Election Studies               |
| Switzerland | 1983 | Swiss National Election Studies               |
| Switzerland | 1987 | Swiss National Election Studies               |
| Switzerland | 1991 | Swiss National Election Studies               |
| Switzerland | 1995 | Swiss National Election Studies               |
| Switzerland | 1999 | Swiss National Election Studies               |
| Switzerland | 2003 | Swiss National Election Studies               |
| Switzerland | 2007 | Swiss National Election Studies               |
| Switzerland | 2011 | Swiss National Election Studies               |
| Switzerland | 2015 | Swiss National Election Studies               |
| Switzerland | 2019 | Swiss National Election Studies               |
| UK          | 1955 | British Election Studies                      |
| UK          | 1959 | British Election Studies                      |
| UK          | 1964 | British Election Studies                      |
| UK          | 1966 | British Election Studies                      |
| UK          | 1970 | British Election Studies                      |
| UK          | 1974 | British Election Studies                      |
| UK          | 1979 | British Election Studies                      |
| UK          | 1983 | British Election Studies                      |
| UK          | 1987 | British Election Studies                      |
| UK          | 1992 | British Election Studies                      |
| UK          | 1997 | British Election Studies                      |
| UK          | 2001 | British Election Studies                      |
| UK          | 2005 | British Election Studies                      |
| UK          | 2010 | British Election Studies                      |
| UK          | 2015 | British Election Studies                      |
| UK          | 2017 | British Election Studies                      |
| US          | 1948 | American National Election Studies            |
| US          | 1952 | American National Election Studies            |
| US          | 1956 | American National Election Studies            |

|    |      |                                    |
|----|------|------------------------------------|
| US | 1960 | American National Election Studies |
| US | 1964 | American National Election Studies |
| US | 1968 | American National Election Studies |
| US | 1972 | American National Election Studies |
| US | 1976 | American National Election Studies |
| US | 1980 | American National Election Studies |
| US | 1984 | American National Election Studies |
| US | 1988 | American National Election Studies |
| US | 1992 | American National Election Studies |
| US | 1996 | American National Election Studies |
| US | 2000 | American National Election Studies |
| US | 2004 | American National Election Studies |
| US | 2008 | American National Election Studies |
| US | 2012 | American National Election Studies |
| US | 2016 | American National Election Studies |
| US | 2020 | American National Election Studies |

**Source:** authors' elaboration.

**Table A2 - Main classification of political parties**

|                | <b>Social Democratic / Socialist / Communist / Green / Other left-wing parties</b>   |
|----------------|--------------------------------------------------------------------------------------|
| Australia      | Labor Party, Greens                                                                  |
| Austria        | Social Democratic Party, KPÖ, Greens, NEOS, Other left                               |
| Belgium        | Socialist Party, Socialist Party Differently, Ecolo, Groen, PTB                      |
| Canada         | Liberal Party, Green Party, New Democratic Party                                     |
| Denmark        | Social Democrats, Socialist People's Party, Social Liberal Party, Red-Green Alliance |
| Finland        | Social Democratic Party, Green League, Left Alliance, Other left                     |
| France         | Socialist Party, Communist Party, Other left                                         |
| Germany        | Social Democratic Party, Alliance 90/The Greens, Die Linke                           |
| Iceland        | Left-Green Movement, Social Democratic Alliance, People's Party                      |
| Ireland        | Fianna Fáil, Sinn Féin, Labour Party, Green Party, Other left                        |
| Italy          | Democratic Party, Free and Equal, Other left                                         |
| Luxembourg     | Socialist Workers' Party, Greens, Other left                                         |
| Netherlands    | Labour Party, Socialist Party, D66, Greens, Other left                               |
| New Zealand    | Labour Party, Greens, Other left                                                     |
| Norway         | Labour Party, Green Party, Socialist Left Party                                      |
| Portugal       | Socialist Party, Left Bloc, Unitary Democratic Coalition                             |
| Spain          | Socialist Workers' Party, Podemos, United Left, Other left                           |
| Sweden         | Social Democratic Party, Left Party, Green Party                                     |
| Switzerland    | Social Democrats, Party of Labour, Green Party, Green Liberal Party                  |
| United Kingdom | Labour Party                                                                         |
| United States  | Democratic Party                                                                     |

**Source:** authors' elaboration.

**Table A3 - Detailed classification of political parties**

| <b>Country</b> | <b>Party</b>                              | <b>Family</b>                              | <b>Left-right score (voters)</b> | <b>Left-right score (manifestos)</b> |
|----------------|-------------------------------------------|--------------------------------------------|----------------------------------|--------------------------------------|
| Australia      | Labor Party                               | Social Democrats / Socialists / Other left | -0,7                             | -17,0                                |
| Australia      | Liberal Party                             | Conservatives / Christian Democrats        | 0,8                              | 18,2                                 |
| Australia      | Australian Greens                         | Greens                                     | -1,5                             | -30,5                                |
| Australia      | National Party                            | Conservatives / Christian Democrats        | 0,8                              | 16,6                                 |
| Australia      | Australian Democrats                      | Conservatives / Christian Democrats        | -0,6                             | -17,1                                |
| Australia      | Palmer United Party                       | Anti-immigration                           |                                  | 7,4                                  |
| Australia      | One Nation Party                          | Anti-immigration                           | 0,5                              |                                      |
| Austria        | Social Democratic Party of Austria (SPÖ)  | Social Democrats / Socialists / Other left | -0,6                             | -15,8                                |
| Austria        | Austrian People's Party (ÖVP)             | Conservatives / Christian Democrats        | 0,4                              | 12,2                                 |
| Austria        | Freedom Party of Austria (FPÖ)            | Anti-immigration                           | 1,0                              | 4,2                                  |
| Austria        | Greens                                    | Greens                                     | -1,1                             | -11,2                                |
| Austria        | NEOS / Liberal Forum                      | Liberals / Social-liberals                 | -0,1                             | 9,0                                  |
| Belgium        | Christian People's Party (CVP)            | Conservatives / Christian Democrats        | 0,7                              | 5,5                                  |
| Belgium        | Belgian Socialist Party (PSB)             | Social Democrats / Socialists / Other left | -1,8                             | -15,2                                |
| Belgium        | Socialist Party (PS)                      | Social Democrats / Socialists / Other left | -1,3                             | -16,0                                |
| Belgium        | New Flemish Alliance (N-VA)               | Other                                      | 0,9                              | 9,6                                  |
| Belgium        | Party for Freedom and Progress (PLP/PVV)  | Liberals / Social-liberals                 | 0,4                              | 21,1                                 |
| Belgium        | Open Flemish Liberals and Democrats (VLD) | Liberals / Social-liberals                 | 0,5                              | 7,8                                  |
| Belgium        | Socialist Party (SP / sp.a)               | Social Democrats / Socialists / Other left | -1,3                             | -12,8                                |
| Belgium        | Reformist movement (MR)                   | Liberals / Social-liberals                 | 1,1                              | -12,9                                |
| Belgium        | Christian Democratic and Flemish (CD&V)   | Conservatives / Christian Democrats        | 0,5                              | 9,8                                  |
| Belgium        | PL                                        | Liberals / Social-liberals                 |                                  | 21,9                                 |
| Belgium        | Christian Social Party (PSC)              | Conservatives / Christian Democrats        | 0,5                              | -2,9                                 |
| Belgium        | Liberal Reformist Party (PRL)             | Liberals / Social-liberals                 | 0,3                              | 7,1                                  |
| Belgium        | Volksunie (VU)                            | Other                                      | 0,3                              | 3,3                                  |
| Belgium        | Vlaams Blok                               | Anti-immigration                           | 1,1                              | 8,7                                  |
| Belgium        | Workers' Party of Belgium (PTB)           | Social Democrats / Socialists / Other left | -2,1                             | -29,3                                |

|         |                                                |                                            |      |       |
|---------|------------------------------------------------|--------------------------------------------|------|-------|
| Belgium | Communist Party (PCB)                          | Social Democrats / Socialists / Other left | -2,7 |       |
| Canada  | Liberal Party                                  | Social Democrats / Socialists / Other left | -0,1 | -1,1  |
| Canada  | Conservative Party                             | Conservatives / Christian Democrats        | 0,7  | 10,5  |
| Canada  | Canadian Alliance                              | Conservatives / Christian Democrats        |      | 18,8  |
| Canada  | Reform Party                                   | Conservatives / Christian Democrats        | 0,6  | 29,2  |
| Canada  | New Democratic Party                           | Social Democrats / Socialists / Other left | -0,9 | -26,9 |
| Canada  | Bloc Québécois                                 | Other                                      | -0,7 | -5,9  |
| Canada  | Social Credit Party                            | Conservatives / Christian Democrats        | -0,5 | 7,5   |
| Denmark | Social Democratic Party                        | Social Democrats / Socialists / Other left | -1,0 | -15,5 |
| Denmark | Liberal Party of Denmark (Venstre)             | Liberals / Social-liberals                 | 1,5  | 17,0  |
| Denmark | Conservative People's Party                    | Conservatives / Christian Democrats        | 1,8  | 23,9  |
| Denmark | Danish People's Party                          | Anti-immigration                           | 1,3  | 27,9  |
| Denmark | Progress Party                                 | Anti-immigration                           | 1,5  | 25,5  |
| Denmark | Socialist People's Party                       | Social Democrats / Socialists / Other left | -2,2 | -34,9 |
| Denmark | Danish Social-Liberal Party (Radikale Venstre) | Liberals / Social-liberals                 | -0,6 | -7,8  |
| Finland | Social Democratic Party                        | Social Democrats / Socialists / Other left | -1,1 | -4,2  |
| Finland | Agrarian Union                                 | Other                                      |      | 8,9   |
| Finland | Centre Party                                   | Other                                      | 0,6  | 2,2   |
| Finland | Finnish People's Democratic League             | Communists                                 | -2,1 | -22,4 |
| Finland | National Coalition Party                       | Conservatives / Christian Democrats        | 1,5  | 10,4  |
| Finland | True Finns                                     | Anti-immigration                           | -0,2 | 7,4   |
| Finland | Left Alliance                                  | Social Democrats / Socialists / Other left | -2,2 | -27,1 |
| Finland | Greens                                         | Greens                                     | -0,8 | -17,2 |
| Finland | Finnish People's Party                         | Liberals / Social-liberals                 |      | 27,0  |
| Finland | Finnish Rural Party                            | Conservatives / Christian Democrats        | -0,1 | 26,3  |
| Finland | Swedish People's Party                         | Other                                      | 0,9  | 0,7   |
| France  | UDR/UNR                                        | Conservatives / Christian Democrats        |      | 25,6  |
| France  | La République En Marche! (LRM)                 | Liberals / Social-liberals                 | -0,4 | 4,8   |
| France  | UDF/MoDem                                      | Conservatives / Christian Democrats        | 0,1  | 14,8  |
| France  | LR/UMP/RPR                                     | Conservatives / Christian Democrats        | 1,5  | 9,7   |
| France  | PS/SFIO                                        | Social Democrats / Socialists / Other left | -1,7 | -23,0 |
| France  | Communist Party (PCF)                          | Communists                                 |      | -24,4 |
| France  | MRP/CD                                         | Conservatives / Christian Democrats        |      | 10,3  |
| France  | Reforming Movement (MR, 1973)                  | Conservatives / Christian Democrats        |      | 3,8   |

|         |                                                     |                                            |      |       |
|---------|-----------------------------------------------------|--------------------------------------------|------|-------|
| France  | Republican Party of Liberty - Conservatives         | Conservatives / Christian Democrats        |      | 1,5   |
| France  | National Front (FN)                                 | Anti-immigration                           | 1,5  | 32,2  |
| France  | Progress and Modern Democracy                       | Other                                      |      | 1,2   |
| France  | Rally for the French People - Gaullists             | Conservatives / Christian Democrats        |      | 12,0  |
| France  | La France Insoumise (FI) / Front de gauche (FDG)    | Social Democrats / Socialists / Other left | -2,2 | -27,6 |
| France  | National Centre of Independents and Peasants (CNIP) | Conservatives / Christian Democrats        |      | 23,1  |
| France  | Radical Party                                       | Social Democrats / Socialists / Other left |      | -6,3  |
| Germany | CDU/CSU                                             | Conservatives / Christian Democrats        |      | 12,6  |
| Germany | Social Democratic Party of Germany (SPD)            | Social Democrats / Socialists / Other left |      | -13,0 |
| Germany | Die Linke                                           | Social Democrats / Socialists / Other left |      | -29,1 |
| Germany | Free Democratic Party (FDP)                         | Liberals / Social-liberals                 |      | 4,5   |
| Germany | Alternative for Germany (AfD)                       | Anti-immigration                           |      | 15,9  |
| Germany | Greens                                              | Greens                                     |      | -17,2 |
| Germany | All-German Bloc (GB/BHE)                            | Conservatives / Christian Democrats        |      | -1,3  |
| Iceland | Independence Party                                  | Conservatives / Christian Democrats        | 1,6  | 15,4  |
| Iceland | Social Democratic Alliance                          | Social Democrats / Socialists / Other left | -1,3 | -12,2 |
| Iceland | Progressive Party                                   | Conservatives / Christian Democrats        | 0,0  | 6,5   |
| Iceland | United Socialist Party                              | Social Democrats / Socialists / Other left |      | -13,4 |
| Iceland | People's Alliance                                   | Social Democrats / Socialists / Other left | -1,9 | -26,3 |
| Iceland | Social Democratic Party                             | Social Democrats / Socialists / Other left | -0,2 | -24,3 |
| Iceland | Left-Green Movement                                 | Greens                                     | -2,2 | -15,6 |
| Iceland | Centre Party                                        | Conservatives / Christian Democrats        | 0,9  |       |
| Iceland | Pirate Party                                        | Other                                      | -1,0 | -15,3 |
| Iceland | Reform Party                                        | Liberals / Social-liberals                 | 0,7  | 5,7   |
| Iceland | Women's Alliance                                    | Social Democrats / Socialists / Other left | -1,1 | -33,5 |
| Iceland | People's Party                                      | Other                                      |      | -18,0 |
| Iceland | Liberal Party                                       | Conservatives / Christian Democrats        | -0,1 | 13,9  |
| Iceland | National Preservation Party                         | Other                                      |      | -38,5 |
| Iceland | Bright Future                                       | Liberals / Social-liberals                 | -0,7 | 2,2   |
| Ireland | Fianna Fáil                                         | Social Democrats / Socialists / Other left | 0,4  | 2,8   |
| Ireland | Fine Gael                                           | Conservatives / Christian Democrats        | 0,3  | 6,7   |
| Ireland | Labour Party                                        | Social Democrats / Socialists / Other left | -1,1 | -21,9 |
| Ireland | Sinn Féin                                           | Social Democrats / Socialists / Other left | -1,3 | -9,4  |
| Ireland | Progressive Democrats                               | Conservatives / Christian Democrats        | 0,3  | 11,1  |



|             |                                                      |                                            |      |       |
|-------------|------------------------------------------------------|--------------------------------------------|------|-------|
| Italy       | Christian Democracy (DC)                             | Conservatives / Christian Democrats        | 1,3  | 6,6   |
| Italy       | Olive Tree                                           | Social Democrats / Socialists / Other left | -2,1 | -32,9 |
| Italy       | People of Freedom (PDL)                              | Conservatives / Christian Democrats        | 2,5  | 14,7  |
| Italy       | Five Star Movement (M5S)                             | Social Democrats / Socialists / Other left | -0,6 | -20,5 |
| Italy       | Italian Communist Party (PCI)                        | Communists                                 | -2,2 | -10,2 |
| Italy       | Democratic Party (PD)                                | Social Democrats / Socialists / Other left | -2,1 | -3,2  |
| Italy       | Forza Italia (FI)                                    | Conservatives / Christian Democrats        | 2,2  | 25,4  |
| Italy       | Democratic Party of the Left (PDS)                   | Social Democrats / Socialists / Other left | -2,9 | -2,8  |
| Italy       | Democrats of the Left (DS) / Margherita / Ulivo      | Social Democrats / Socialists / Other left | -1,8 | -12,8 |
| Italy       | Italian Socialist Party of Proletarian Unity (PSIUP) | Social Democrats / Socialists / Other left | -1,3 | -1,5  |
| Italy       | National Alliance (AN)                               | Conservatives / Christian Democrats        | 3,1  | 6,5   |
| Italy       | Populares for Italy (PPI)                            | Social Democrats / Socialists / Other left | 0,1  | -2,2  |
| Italy       | Italian Socialist Party (PSI)                        | Social Democrats / Socialists / Other left | -0,4 | -9,9  |
| Italy       | Civic Choice                                         | Conservatives / Christian Democrats        | 0,3  | 15,3  |
| Italy       | Lega                                                 | Anti-immigration                           | 1,8  | 7,0   |
| Italy       | Socialist Party of Italian Workers                   | Social Democrats / Socialists / Other left |      | -34,7 |
| Italy       | Communist Refoundation Party (PRC)                   | Social Democrats / Socialists / Other left | -3,1 | -32,9 |
| Italy       | Italian Social Movement (MSI, MSI-DN)                | Anti-immigration                           | 3,6  | 16,0  |
| Luxembourg  | Christian Social People's Party                      | Conservatives / Christian Democrats        | 1,1  | 8,4   |
| Luxembourg  | Luxembourg Socialist Workers' Party                  | Social Democrats / Socialists / Other left | -1,3 | -13,9 |
| Luxembourg  | Democratic Party                                     | Liberals / Social-liberals                 | 0,2  | 11,8  |
| Luxembourg  | Democratic Group                                     | Liberals / Social-liberals                 |      | 1,5   |
| Luxembourg  | Patriotic and Democratic Group                       | Liberals / Social-liberals                 |      | 9,5   |
| Luxembourg  | Action Committee                                     | Conservatives / Christian Democrats        | 0,2  | 7,7   |
| Luxembourg  | The Greens                                           | Greens                                     | -1,4 | -11,1 |
| Luxembourg  | Communist Party of Luxembourg                        | Communists                                 | -2,0 | -25,3 |
| Luxembourg  | Green List Ecological Initiative                     | Greens                                     | -1,2 | -10,1 |
| Luxembourg  | Alternative Democratic Reform Party                  | Anti-immigration                           |      | 14,9  |
| Netherlands | Catholic People's Party (KVP)                        | Conservatives / Christian Democrats        |      | 5,0   |
| Netherlands | Labour Party (PvdA)                                  | Social Democrats / Socialists / Other left | -1,8 | -15,1 |
| Netherlands | Christian Democratic Appeal (CDA)                    | Conservatives / Christian Democrats        | 1,2  | 1,2   |
| Netherlands | People's Party for Freedom and Democracy (VVD)       | Liberals / Social-liberals                 | 1,4  | 19,6  |
| Netherlands | Pim Fortuyn List (LPF)                               | Anti-immigration                           | 1,0  | 4,2   |
| Netherlands | Party for Freedom (PVV)                              | Anti-immigration                           | 1,3  | 17,2  |

|             |                                                   |                                            |      |       |
|-------------|---------------------------------------------------|--------------------------------------------|------|-------|
| Netherlands | Anti-Revolutionary Party (ARP)                    | Conservatives / Christian Democrats        |      | 11,9  |
| Netherlands | Christian Historical Union (CHU)                  | Conservatives / Christian Democrats        |      | 15,8  |
| Netherlands | Socialist Party (SP)                              | Social Democrats / Socialists / Other left | -1,4 | -20,3 |
| Netherlands | Democrats 66 (D66)                                | Liberals / Social-liberals                 | -0,7 | -6,5  |
| Netherlands | Communist Party of the Netherlands                | Communists                                 |      | -29,3 |
| Netherlands | PvdV                                              | Conservatives / Christian Democrats        |      | 20,7  |
| Netherlands | GroenLinks (GL)                                   | Greens                                     | -2,3 | -9,6  |
| New Zealand | National Party                                    | Conservatives / Christian Democrats        | 1,2  | 15,1  |
| New Zealand | Labour Party                                      | Social Democrats / Socialists / Other left | -1,1 | -15,0 |
| New Zealand | Alliance                                          | Greens                                     | -1,5 | -14,1 |
| New Zealand | Social Credit Party                               | Social Democrats / Socialists / Other left | -0,9 | -8,7  |
| New Zealand | New Zealand First                                 | Anti-immigration                           | 0,0  | 0,9   |
| New Zealand | Green Party of Aotearoa                           | Greens                                     | -2,0 | -2,9  |
| Norway      | Labour Party                                      | Social Democrats / Socialists / Other left | -1,2 | -15,4 |
| Norway      | Conservative Party                                | Conservatives / Christian Democrats        | 1,8  | 17,1  |
| Norway      | Progress Party                                    | Anti-immigration                           | 1,8  | 35,2  |
| Norway      | Christian Democratic Party                        | Conservatives / Christian Democrats        | 0,6  | 10,3  |
| Norway      | Centre Party                                      | Conservatives / Christian Democrats        | -0,3 | 6,1   |
| Norway      | Socialist Left Party / Socialist Electoral League | Social Democrats / Socialists / Other left | -2,4 | -20,4 |
| Norway      | Liberal Party                                     | Liberals / Social-liberals                 | -0,3 | -3,3  |
| Portugal    | Socialist Party (PS)                              | Social Democrats / Socialists / Other left | -0,9 | -6,4  |
| Portugal    | PPD/PSD                                           | Conservatives / Christian Democrats        | 1,6  | 5,2   |
| Portugal    | United People Alliance (APU)                      | Greens                                     | -2,7 | 9,8   |
| Portugal    | PCTP/MRPP                                         | Communists                                 |      | -7,0  |
| Portugal    | CDS / People's Party (PP)                         | Conservatives / Christian Democrats        | 1,8  | 9,7   |
| Portugal    | Unitary Democratic Coalition (CDU, PCP-PEV)       | Greens                                     | -3,1 | -8,1  |
| Portugal    | Left Bloc (BE)                                    | Social Democrats / Socialists / Other left | -2,4 | -23,1 |
| Spain       | Spanish Socialist Workers' Party (PSOE)           | Social Democrats / Socialists / Other left | -1,1 | -8,2  |
| Spain       | People's Party (PP)                               | Conservatives / Christian Democrats        | 1,9  | 13,2  |
| Spain       | Union of the Democratic Centre (UCD)              | Other                                      | -1,3 | 2,6   |
| Spain       | AP-PDP                                            | Conservatives / Christian Democrats        | 2,2  | 16,9  |
| Spain       | VOX                                               | Anti-immigration                           | 2,5  | 45,9  |
| Spain       | Ciudadanos                                        | Liberals / Social-liberals                 | 0,8  | -1,2  |
| Spain       | Podemos                                           | Social Democrats / Socialists / Other left | -1,9 | -20,8 |

|             |                                                  |                                            |      |       |
|-------------|--------------------------------------------------|--------------------------------------------|------|-------|
| Spain       | Communist Party of Spain (PCE)                   | Communists                                 | -2,0 | -17,1 |
| Spain       | United Left (IU)                                 | Social Democrats / Socialists / Other left | -2,1 | -20,0 |
| Spain       | Democratic and Social Centre (CDS)               | Other                                      | 0,5  | -3,9  |
| Sweden      | Swedish Social Democratic Party                  | Social Democrats / Socialists / Other left | -1,4 | -15,6 |
| Sweden      | Moderate/Right Party                             | Conservatives / Christian Democrats        | 2,1  | 39,1  |
| Sweden      | Liberal People's Party                           | Liberals / Social-liberals                 | 1,1  | 6,0   |
| Sweden      | Centre Party                                     | Liberals / Social-liberals                 | 0,9  | 7,4   |
| Sweden      | Sweden Democrats                                 | Anti-immigration                           | 0,5  | 15,0  |
| Sweden      | Left Party                                       | Social Democrats / Socialists / Other left | -2,4 | -29,6 |
| Sweden      | Christian Democrats                              | Conservatives / Christian Democrats        | 1,1  | 5,9   |
| Sweden      | New Democracy                                    | Anti-immigration                           | 1,0  | 34,4  |
| Sweden      | Green Party                                      | Greens                                     | -0,9 | -14,2 |
| Sweden      | Left Party/Communists                            | Communists                                 | -2,7 | -28,6 |
| Switzerland | Social Democratic Party of Switzerland (SPS/PSS) | Social Democrats / Socialists / Other left | -2,0 | -30,0 |
| Switzerland | Free Democratic Party of Switzerland (FDP/PLR)   | Liberals / Social-liberals                 | 0,8  | 16,1  |
| Switzerland | CVP/PDC                                          | Conservatives / Christian Democrats        | 0,6  | 5,0   |
| Switzerland | Swiss People's Party (SVP/UDC)                   | Anti-immigration                           | 1,3  | 13,9  |
| Switzerland | Green Party of Switzerland (GPS/PES)             | Greens                                     | -2,0 | -26,3 |
| Switzerland | Green Liberal Party of Switzerland (GLP/PVL)     | Greens                                     | -1,0 | -5,2  |
| USA         | Democratic Party                                 | Social Democrats / Socialists / Other left | -0,9 | -13,3 |
| USA         | Republican Party                                 | Conservatives / Christian Democrats        | 1,0  | 14,6  |
| UK          | Conservative Party                               | Conservatives / Christian Democrats        | 1,2  | 15,5  |
| UK          | Labour Party                                     | Social Democrats / Socialists / Other left | -0,9 | -14,7 |
| UK          | Liberal Democrats                                | Liberals / Social-liberals                 | -0,4 | -0,8  |
| UK          | Social Democratic Party                          | Social Democrats / Socialists / Other left |      | -10,4 |
| UK          | UK Independence Party (UKIP)                     | Anti-immigration                           | 0,3  | 16,5  |

**Source:** authors' elaboration.

**Note:** the table provides information on the categorization of political parties by family in the survey dataset (see Figure 4 on election results). Parties are sorted by decreasing order of their average vote share in all elections to which they participated. Excludes small parties (average vote share lower than 5% across elections in which the party participated). The left-right score (voters) corresponds to the difference between the average self-placement on a left-right scale (0 to 10) of voters of the corresponding party and the overall average of this variable across all voters. Negative values mean that voters supporting the party are on average more left-wing than the rest of the electorate. The left-right score (manifestos) corresponds to the difference between the average left-right ideological index of the corresponding party in the Comparative Manifesto Project database (-100 to 100) and the overall average of this variable across all parties. Averages over the entire dataset.

**Figure A1 - The disconnection of income and education cleavages in Western democracies (before and after controls)**

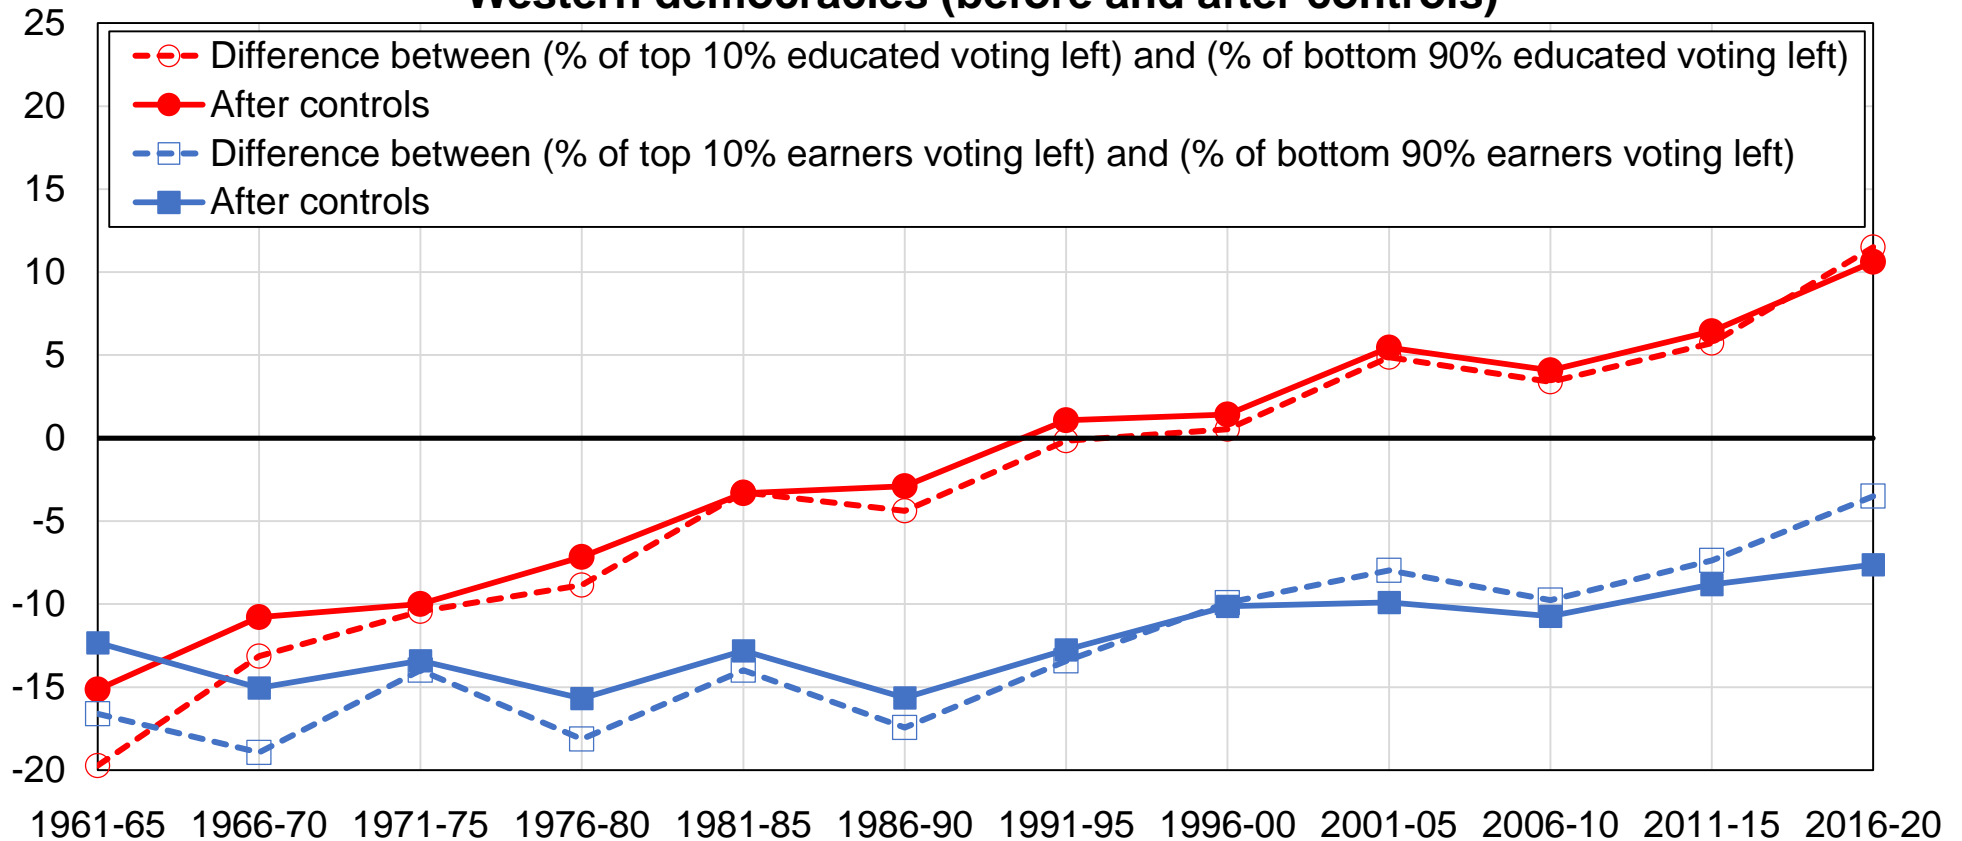

**Source:** authors' computations using the World Political Cleavages and Inequality Database.

**Note:** in the 1960s, both higher-educated and high-income voters were less likely to vote for left-wing (social democratic / socialist / communist / green / other left-wing) parties than lower-educated and low-income voters by more than 10 percentage points. The left vote has gradually become associated with higher education voters, giving rise to a remarkable divergence of the effects of income and education on the vote. Figures correspond to five-year averages for Australia, Britain, Canada, Denmark, France, Germany, Italy, the Netherlands, Norway, Sweden, Switzerland, and the US. The estimates are presented before and after controlling for income/education, age, gender, religion, church attendance, rural/urban, region, race/ethnicity, employment status, and marital status (in country-years for which these variables are available).

**Figure A2 - The disconnection of income and education in Western democracies, unbalanced panel**

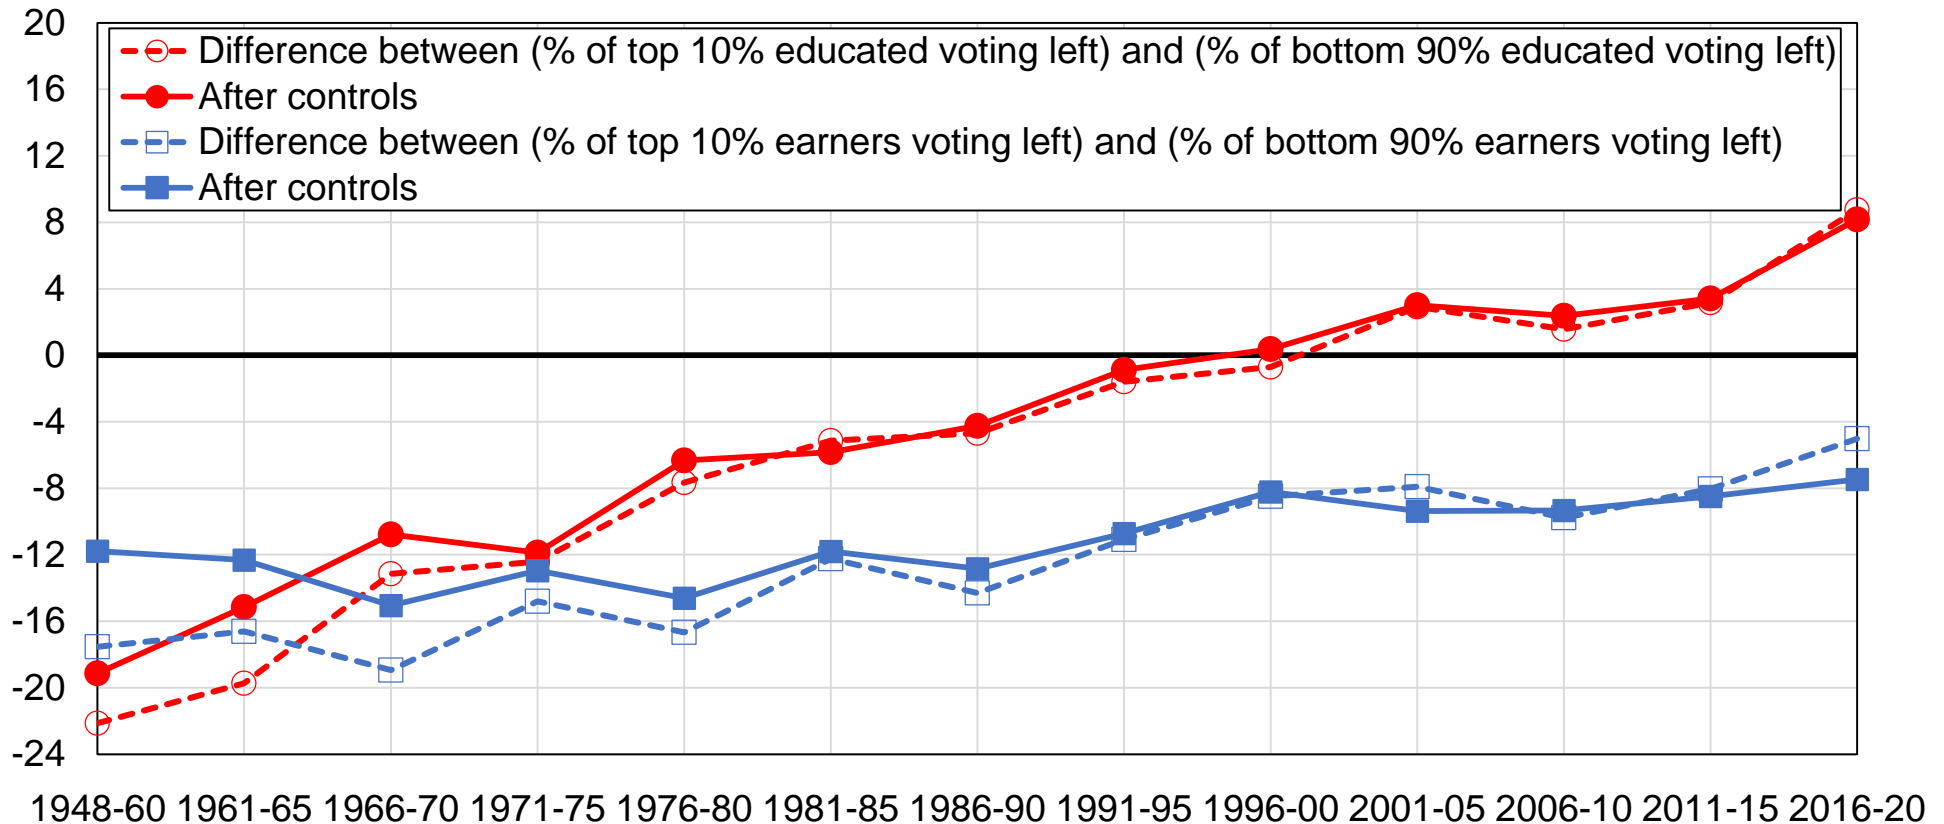

**Source:** authors' computations using the World Political Cleavages and Inequality Database.

**Note:** in the 1960s, both higher-educated and high-income voters were less likely to vote for left-wing (social democratic / socialist / communist / green / other left-wing) parties than lower-educated and low-income voters by more than 10 percentage points. The left vote has gradually become associated with higher education voters, giving rising to a remarkable divergence of the effects of income and education on the vote. Figures correspond to five-year averages over all countries available for a given time period (unbalanced panel of all 21 Western democracies). The estimates are presented before and after controlling for income/education, age, gender, religion, church attendance, rural/urban, region, race/ethnicity, employment status, and marital status (in country-years for which these variables are available).

**Figure A3 - The disconnection of income and education cleavages in Western democracies (top 50% vs. bottom 50%)**

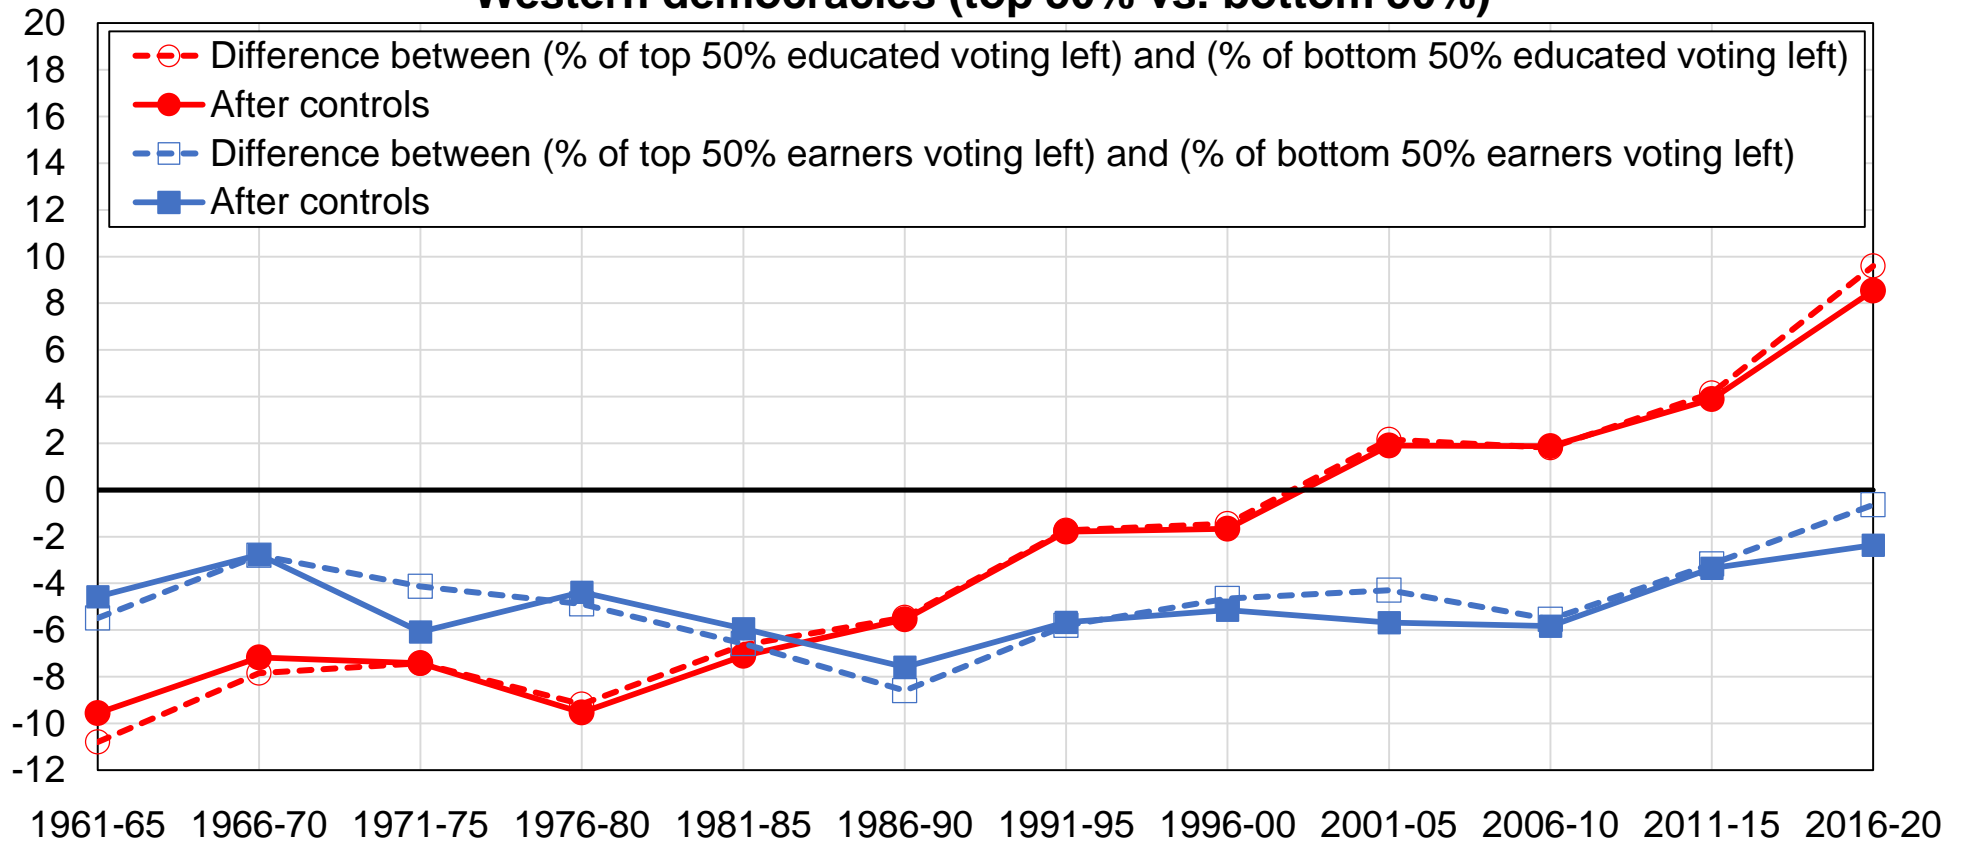

**Source:** authors' computations using the World Political Cleavages and Inequality Database.

**Note:** in the 1960s, both higher-educated and high-income voters were less likely to vote for left-wing (social democratic / socialist / communist / green / other left-wing) parties than lower-educated and low-income voters. The left vote has gradually become associated with higher education voters, giving rising to a remarkable divergence of the effects of income and education on the vote. Figures correspond to five-year averages for Australia, Britain, Canada, Denmark, France, Germany, Italy, the Netherlands, Norway, Sweden, Switzerland, and the US. The estimates are presented before and after controlling for income/education, age, gender, religion, church attendance, rural/urban, region, race/ethnicity, employment status, and marital status (in country-years for which these variables are available).

**Figure A4 - The disconnection of income and education in Western democracies, unbalanced panel (top 50% vs. bottom 50%)**

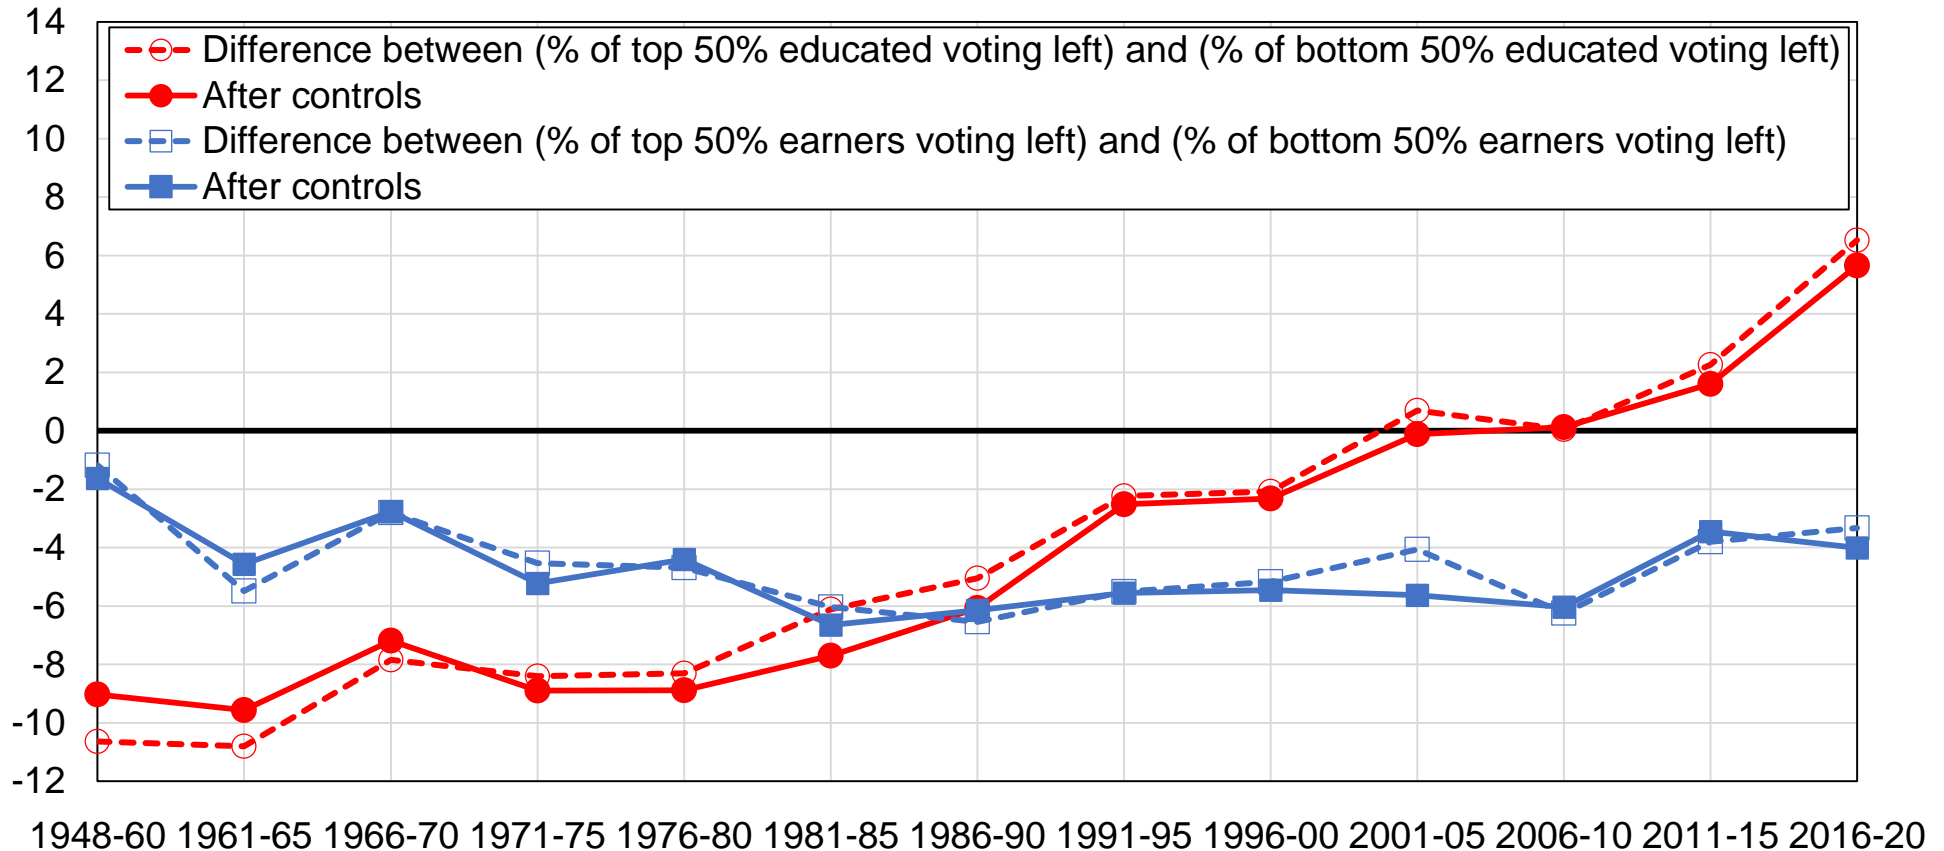

**Source:** authors' computations using the World Political Cleavages and Inequality Database.

**Note:** in the 1960s, both higher-educated and high-income voters were less likely to vote for left-wing (social democratic / socialist / communist / green / other left-wing) parties than lower-educated and low-income voters. The left vote has gradually become associated with higher education voters, giving rising to a remarkable divergence of the effects of income and education on the vote. Figures correspond to five-year averages over all countries available for a given time period (unbalanced panel of all 21 Western democracies). The estimates are presented before and after controlling for income/education, age, gender, religion, church attendance, rural/urban, region, race/ethnicity, employment status, and marital status (in country-years for which these variables are available).

**Figure A5 - The reversal of educational divides in Western democracies (top 10%)**

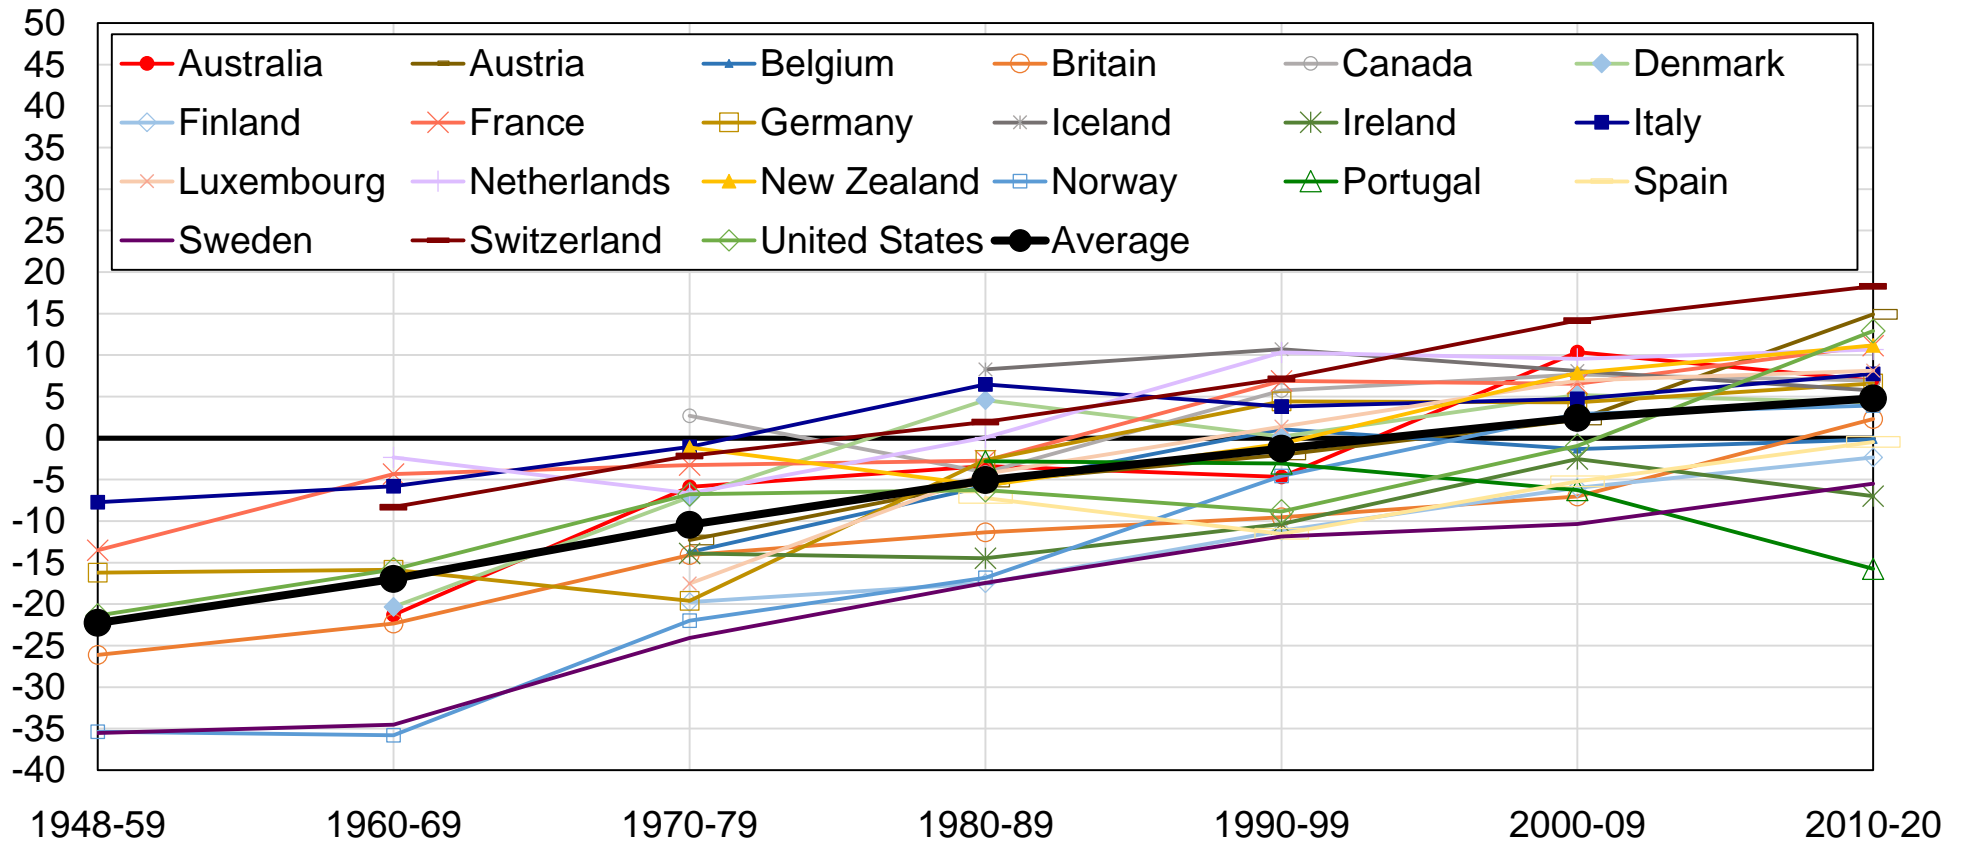

**Source:** authors' computations using the World Political Cleavages and Inequality Database.

**Note:** the figure represents the difference between the share of higher-educated (top 10%) and lower-educated (bottom 90%) voters voting for left-wing (socialist, social democratic, communist, and green) parties in Western countries. In nearly all countries, higher-educated voters used to be significantly more likely to vote for right-wing parties and have gradually become more likely to vote for left-wing parties.



**Figure A6 - The reversal of educational divides in Western democracies (top 10%), after controls**

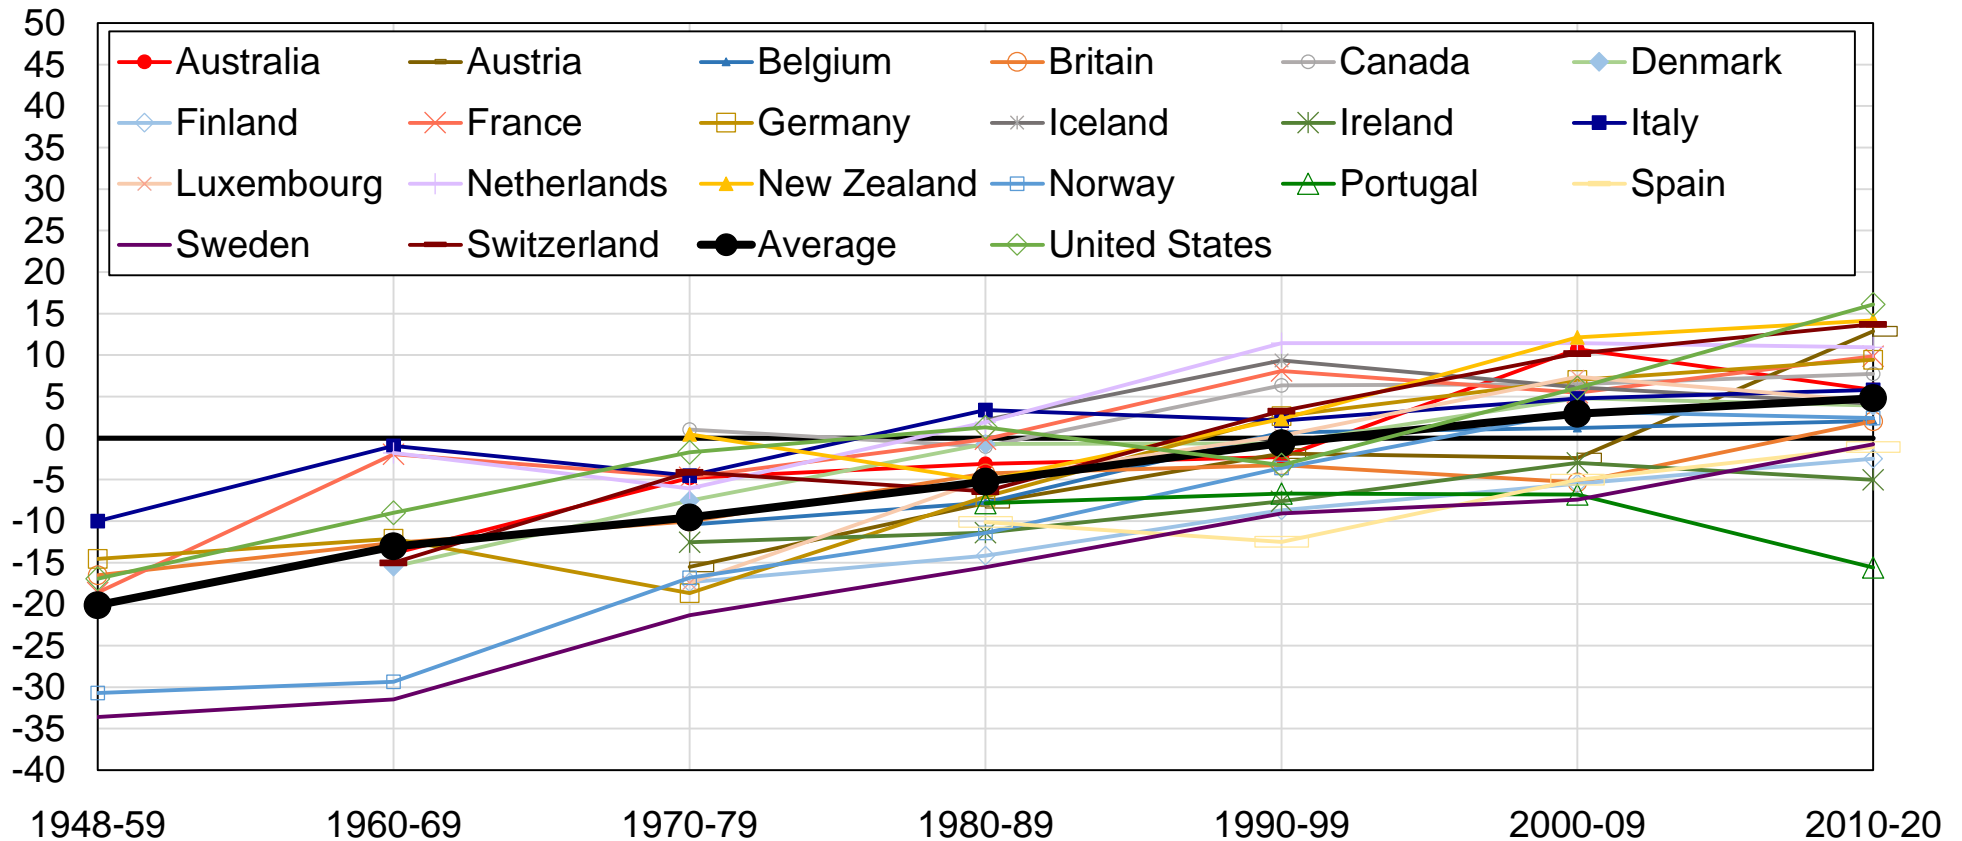

**Source:** authors' computations using the World Political Cleavages and Inequality Database.

**Note:** the figure represents the difference between the share of higher-educated (top 10%) and lower-educated (bottom 90%) voters voting for left-wing (socialist, social democratic, communist, and green) parties in Western countries, after controlling for income, age, gender, religion, church attendance, rural/urban, region, race/ethnicity, employment status, and marital status (in country-years for which these variables are available). In nearly all countries, higher-educated voters used to be significantly more likely to vote for right-wing parties and have gradually become more likely to vote for left-wing parties.

**Figure A7 - The reversal of educational divides in Western democracies (university graduates)**

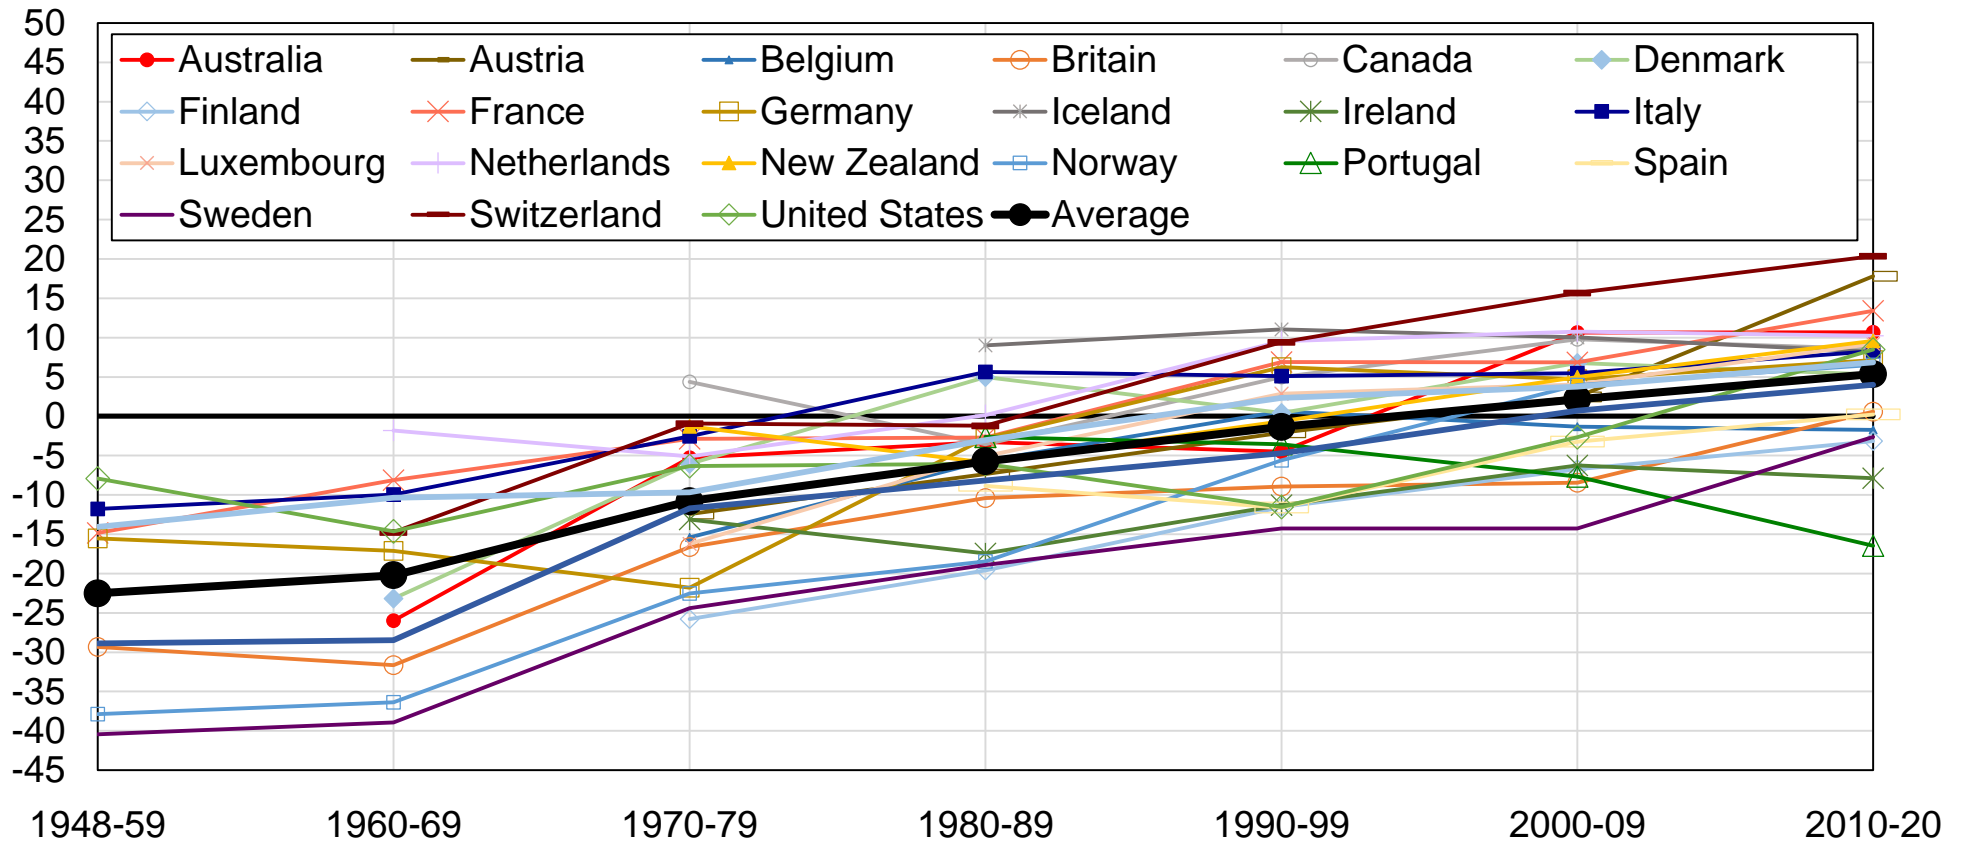

**Source:** authors' computations using the World Political Cleavages and Inequality Database.

**Note:** the figure represents the difference between the share of university graduates and the share of non-university graduates voting for left-wing (socialist, social democratic, communist, and green) parties in Western countries. In nearly all countries, higher-educated voters used to be significantly more likely to vote for right-wing parties and have gradually become more likely to vote for left-wing parties.

**Figure A8 - The reversal of educational divides in Western democracies (university graduates), after controls**

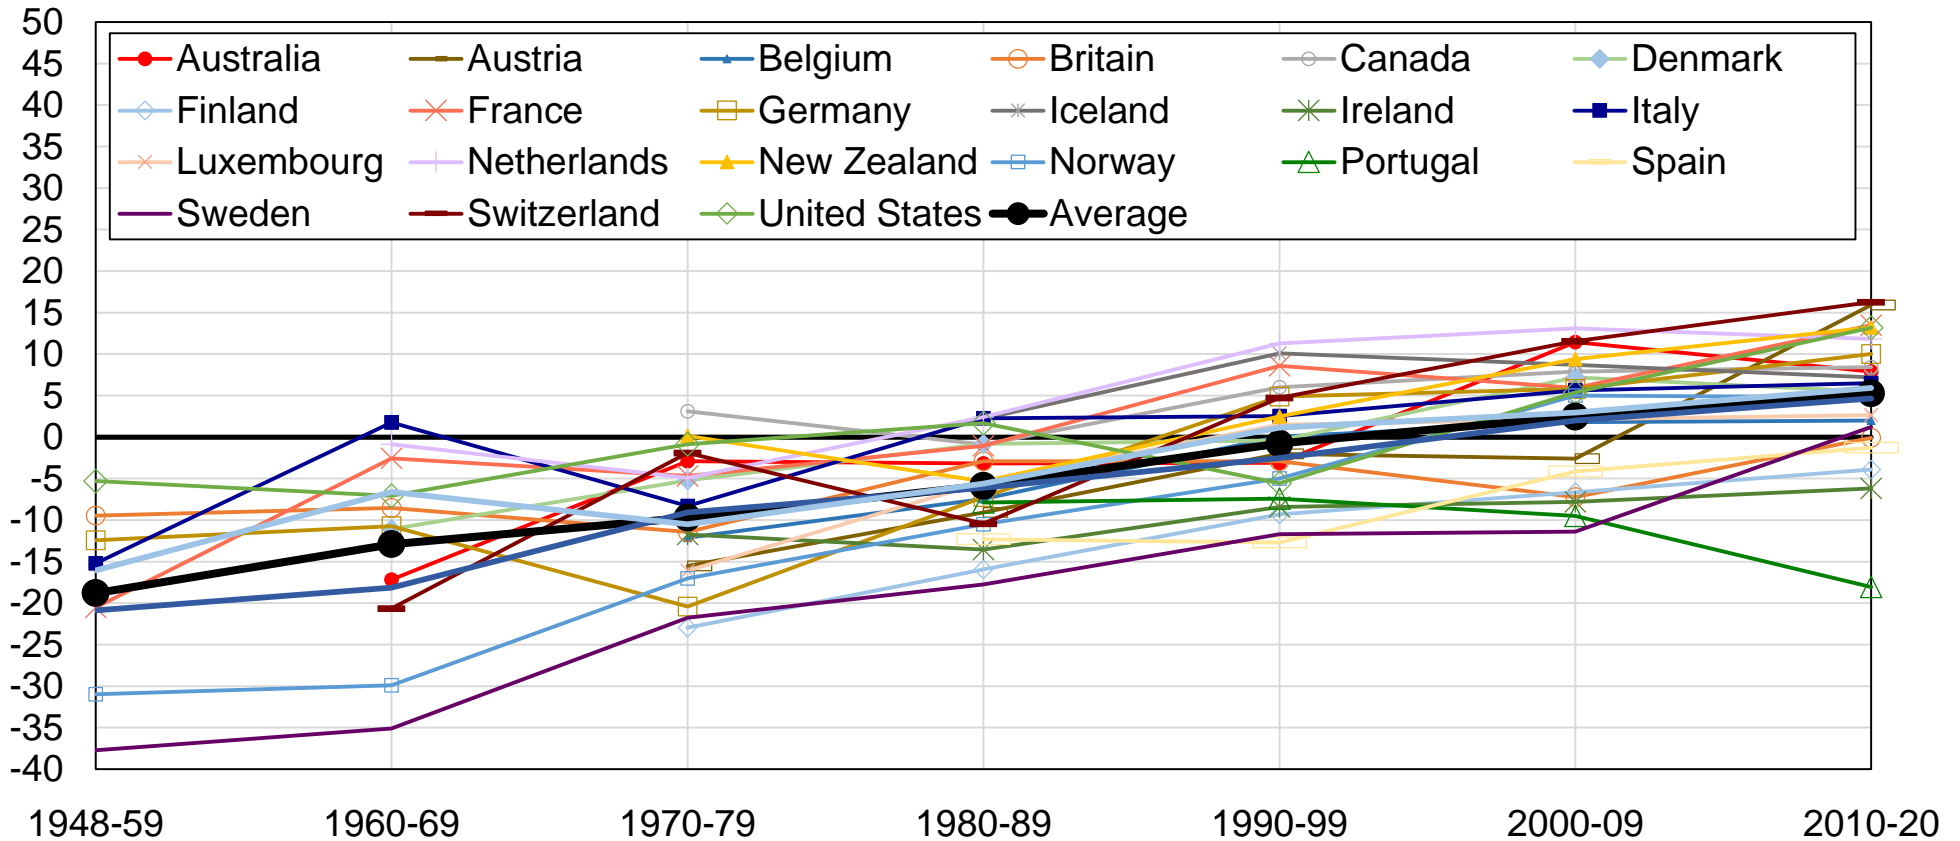

**Source:** authors' computations using the World Political Cleavages and Inequality Database.

**Note:** the figure represents the difference between the share of university graduates and the share of non-university graduates voting for left-wing (socialist, social democratic, communist, and green) parties in Western countries, after controlling for income, age, gender, religion, church attendance, rural/urban, region, race/ethnicity, employment status, and marital status (in country-years for which these variables are available). In nearly all countries, higher-educated voters used to be significantly more likely to vote for right-wing parties and have gradually become more likely to vote for left-wing parties.

**Figure A9 - The reversal of educational divides in Western democracies (bottom 50%)**

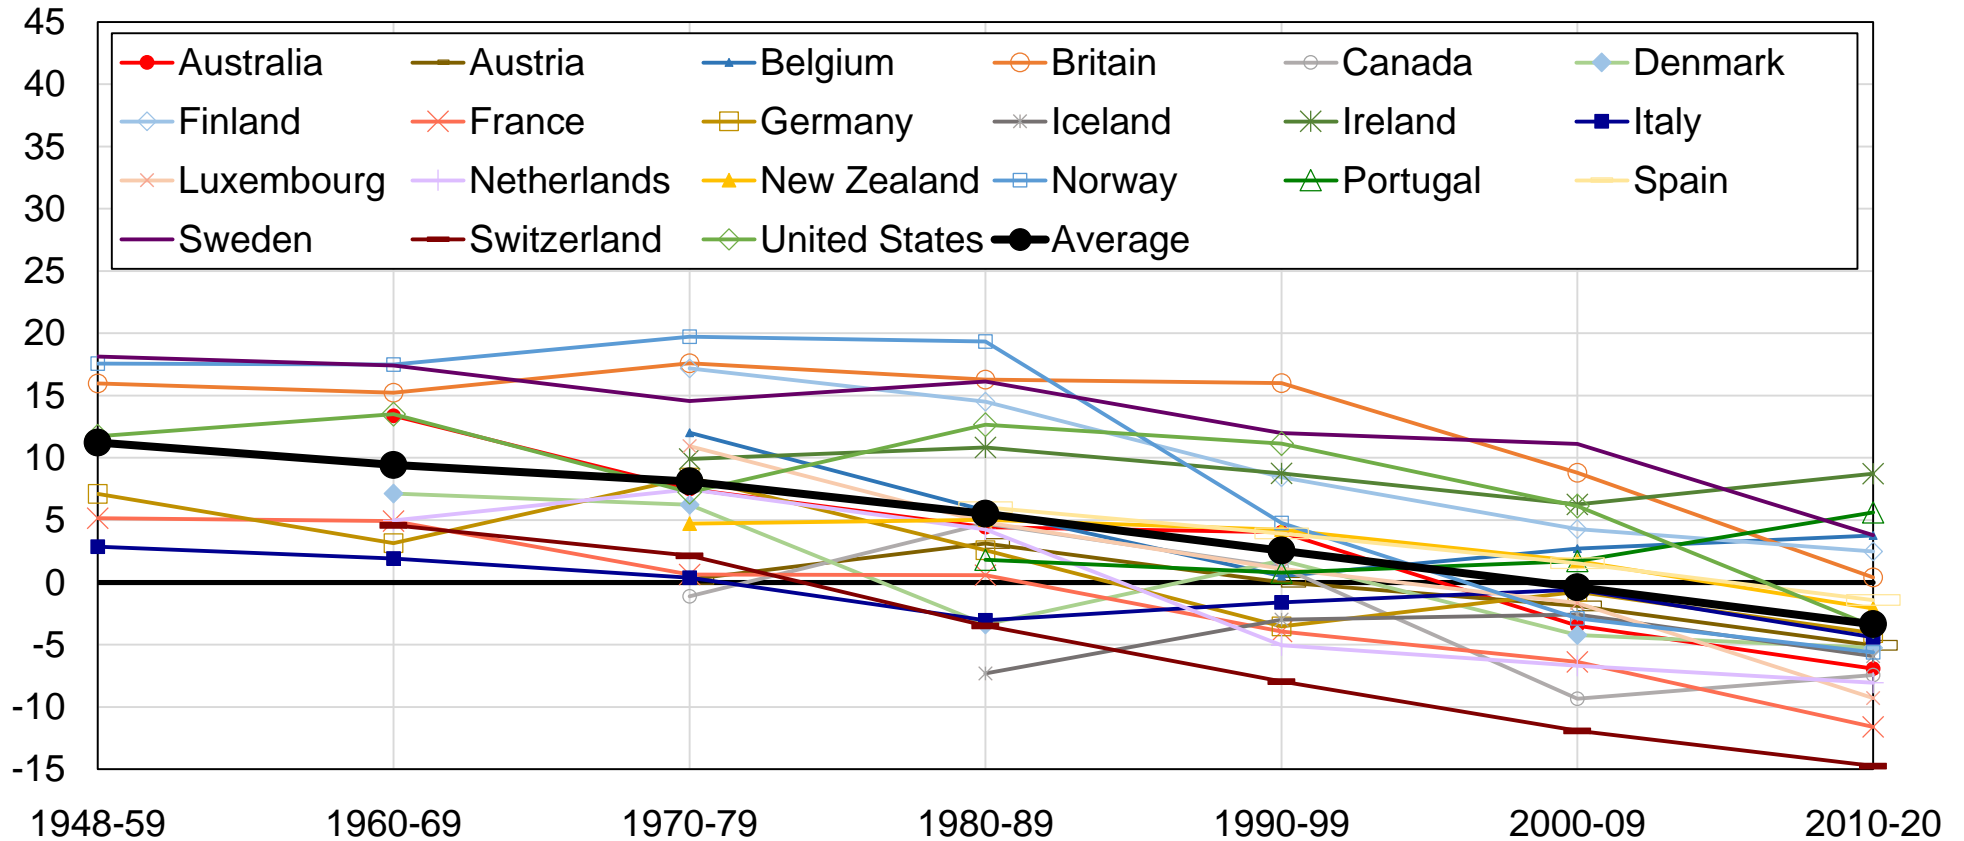

**Source:** authors' computations using the World Political Cleavages and Inequality Database.

**Note:** the figure represents the difference between the share of lower-educated (bottom 50%) and higher-educated (top 50%) voters voting for left-wing (socialist, social democratic, communist, and green) parties in Western countries. In nearly all countries, higher-educated voters used to be significantly more likely to vote for right-wing parties and have gradually become more likely to vote for left-wing parties.

**Figure A10 - The reversal of educational divides in Western democracies (bottom 50%), after controls**

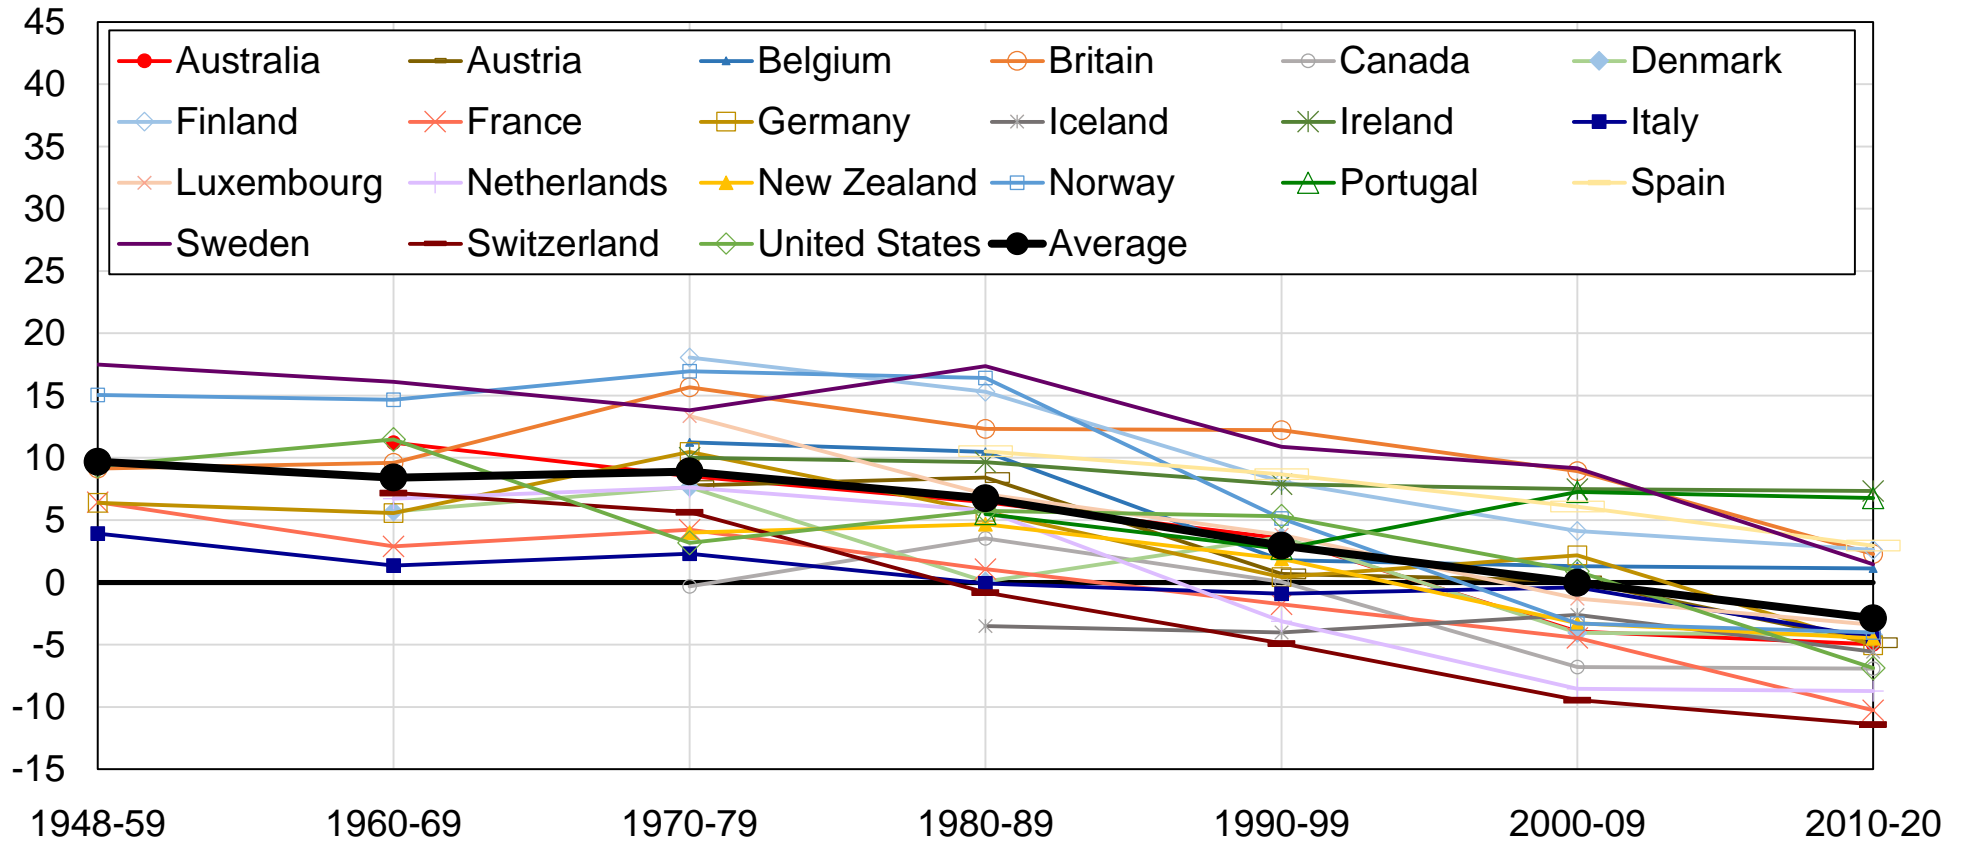

**Source:** authors' computations using the World Political Cleavages and Inequality Database.

**Note:** the figure represents the difference between the share of lower-educated (bottom 50%) and higher-educated (top 50%) voters voting for left-wing (socialist, social democratic, communist, and green) parties in Western countries, after controlling for income, age, gender, religion, church attendance, rural/urban, region, race/ethnicity, employment status, and marital status (in country-years for which these variables are available). In nearly all countries, higher-educated voters used to be significantly more likely to vote for right-wing parties and have gradually become more likely to vote for left-wing parties.

**Figure A11 - The reversal of educational divides in Western democracies (primary-educated voters)**

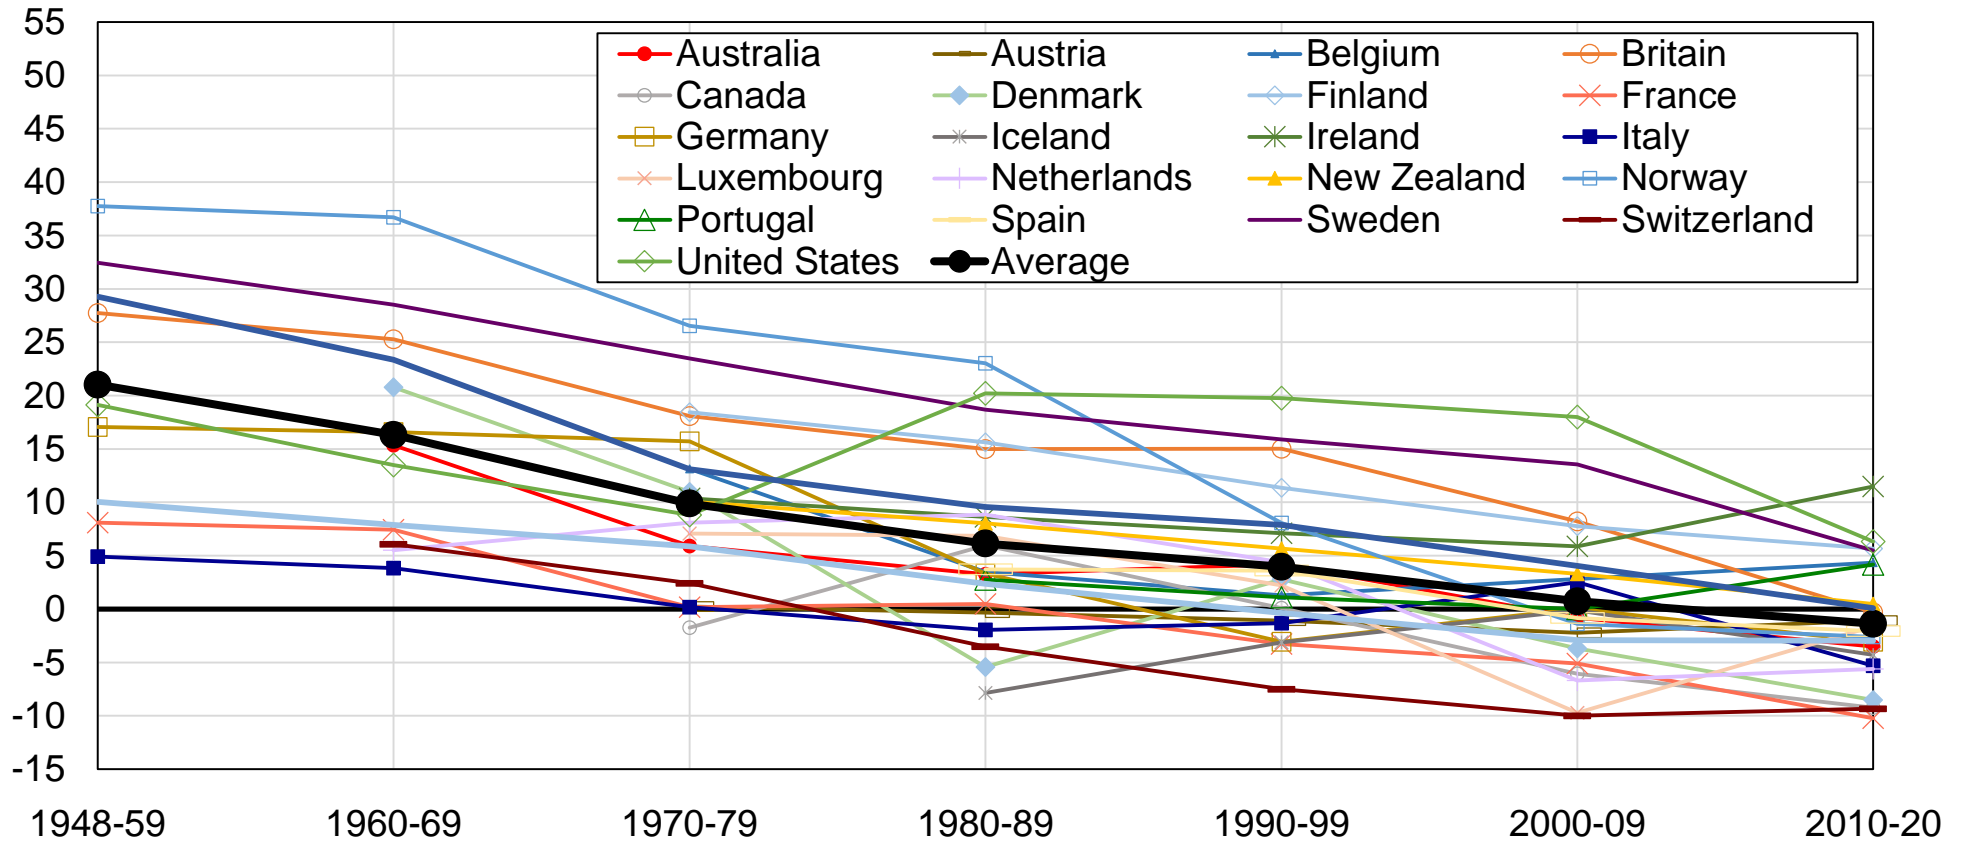

**Source:** authors' computations using the World Political Cleavages and Inequality Database.

**Note:** the figure represents the difference between the share of primary-educated voters and the share of other voters voting for left-wing (socialist, social democratic, communist, and green) parties in Western countries. In nearly all countries, higher-educated voters used to be significantly more likely to vote for right-wing parties and have gradually become more likely to vote for left-wing parties.

**Figure A12 - The reversal of educational divides in Western democracies (primary-educated voters), after controls**

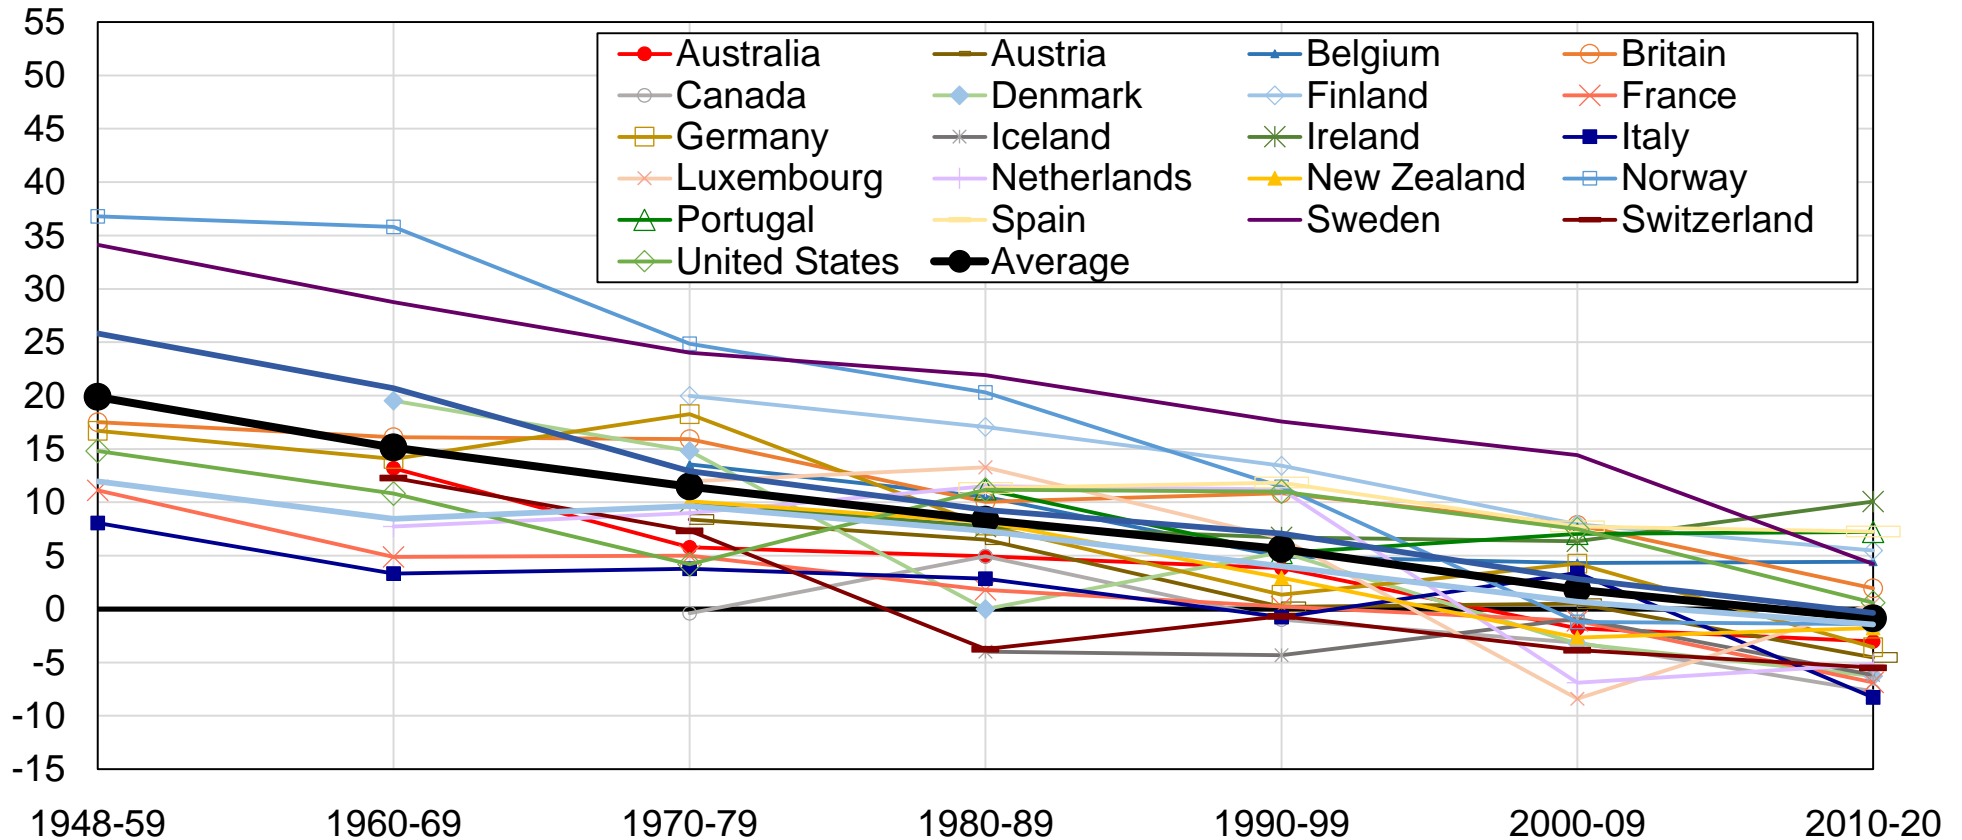

**Source:** authors' computations using the World Political Cleavages and Inequality Database.

**Note:** the figure represents the difference between the share of primary-educated voters and the share of other voters voting for left-wing (socialist, social democratic, communist, and green) parties in Western countries, after controlling for income, age, gender, religion, church attendance, rural/urban, region, race/ethnicity, employment status, and marital status (in country-years for which these variables are available). In nearly all countries, higher-educated voters used to be significantly more likely to vote for right-wing parties and have gradually become more likely to vote for left-wing parties.

**Figure A13 - The reversal of educational divides in Western democracies (continuous variable)**

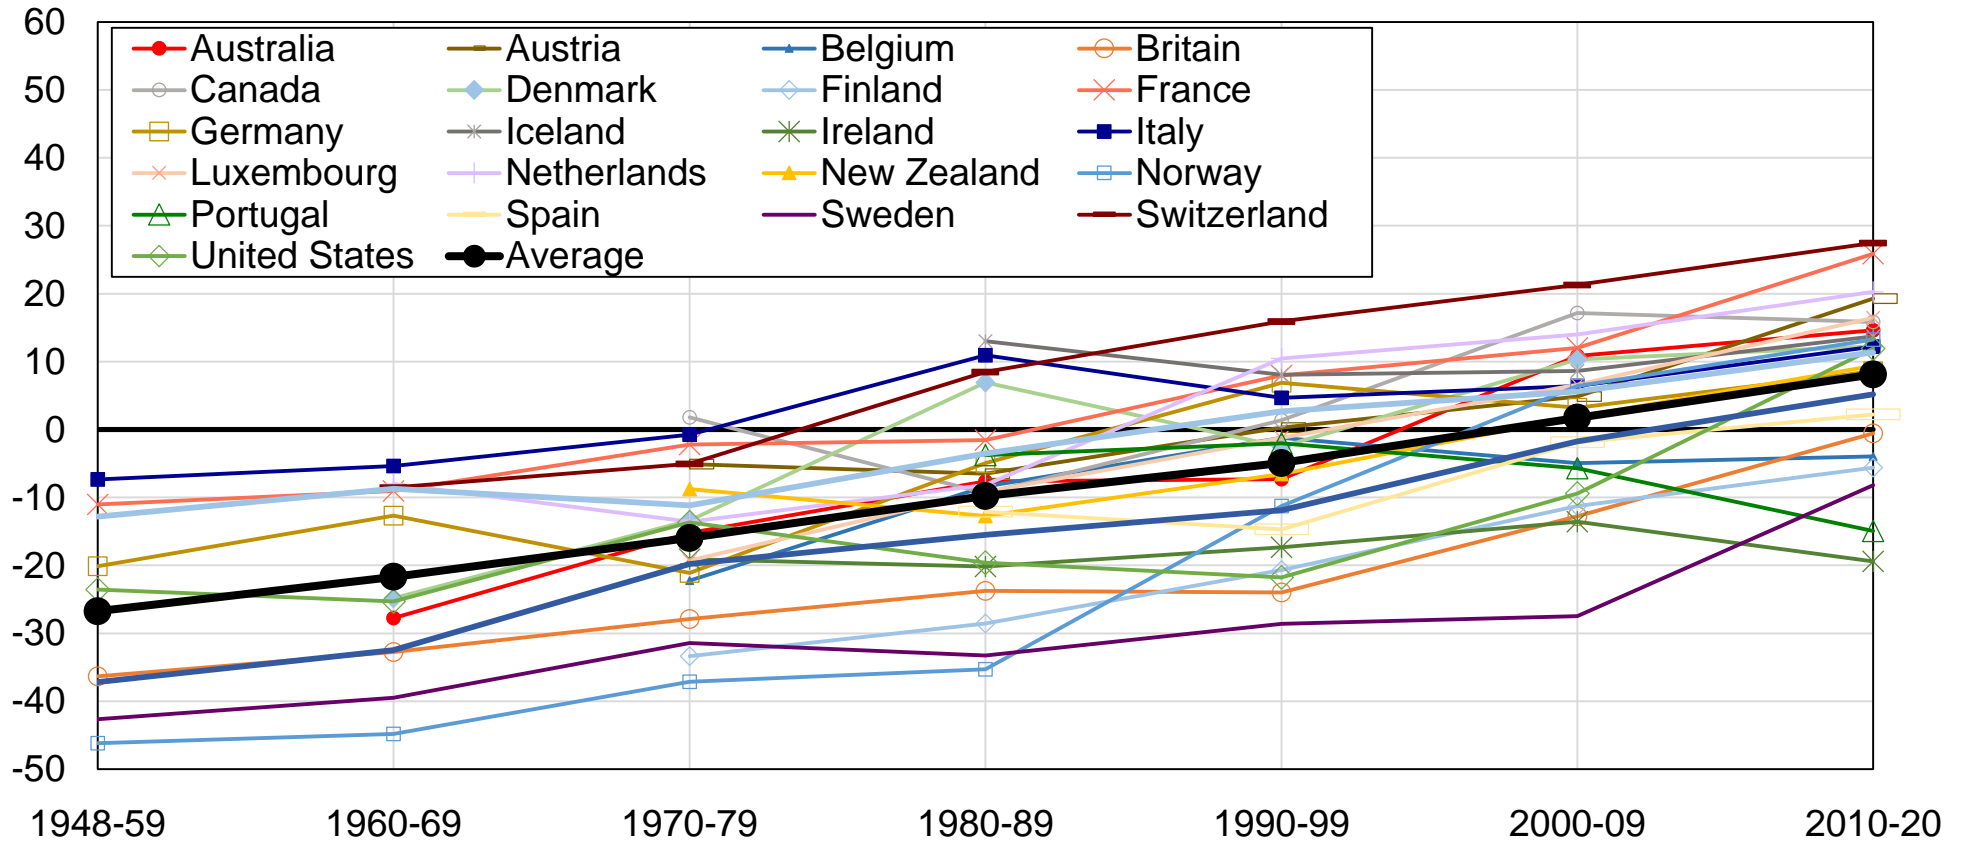

**Source:** authors' computations using the World Political Cleavages and Inequality Database.

**Note:** the figure represents the marginal effect of the education rank (quantile) of voters on support for left-wing (socialist, social democratic, communist, and green) parties in Western countries. In nearly all countries, higher-educated voters used to be significantly more likely to vote for right-wing parties and have gradually become more likely to vote for left-wing parties.



**Figure A14 - The reversal of educational divides in Western democracies (continuous variable), after controls**

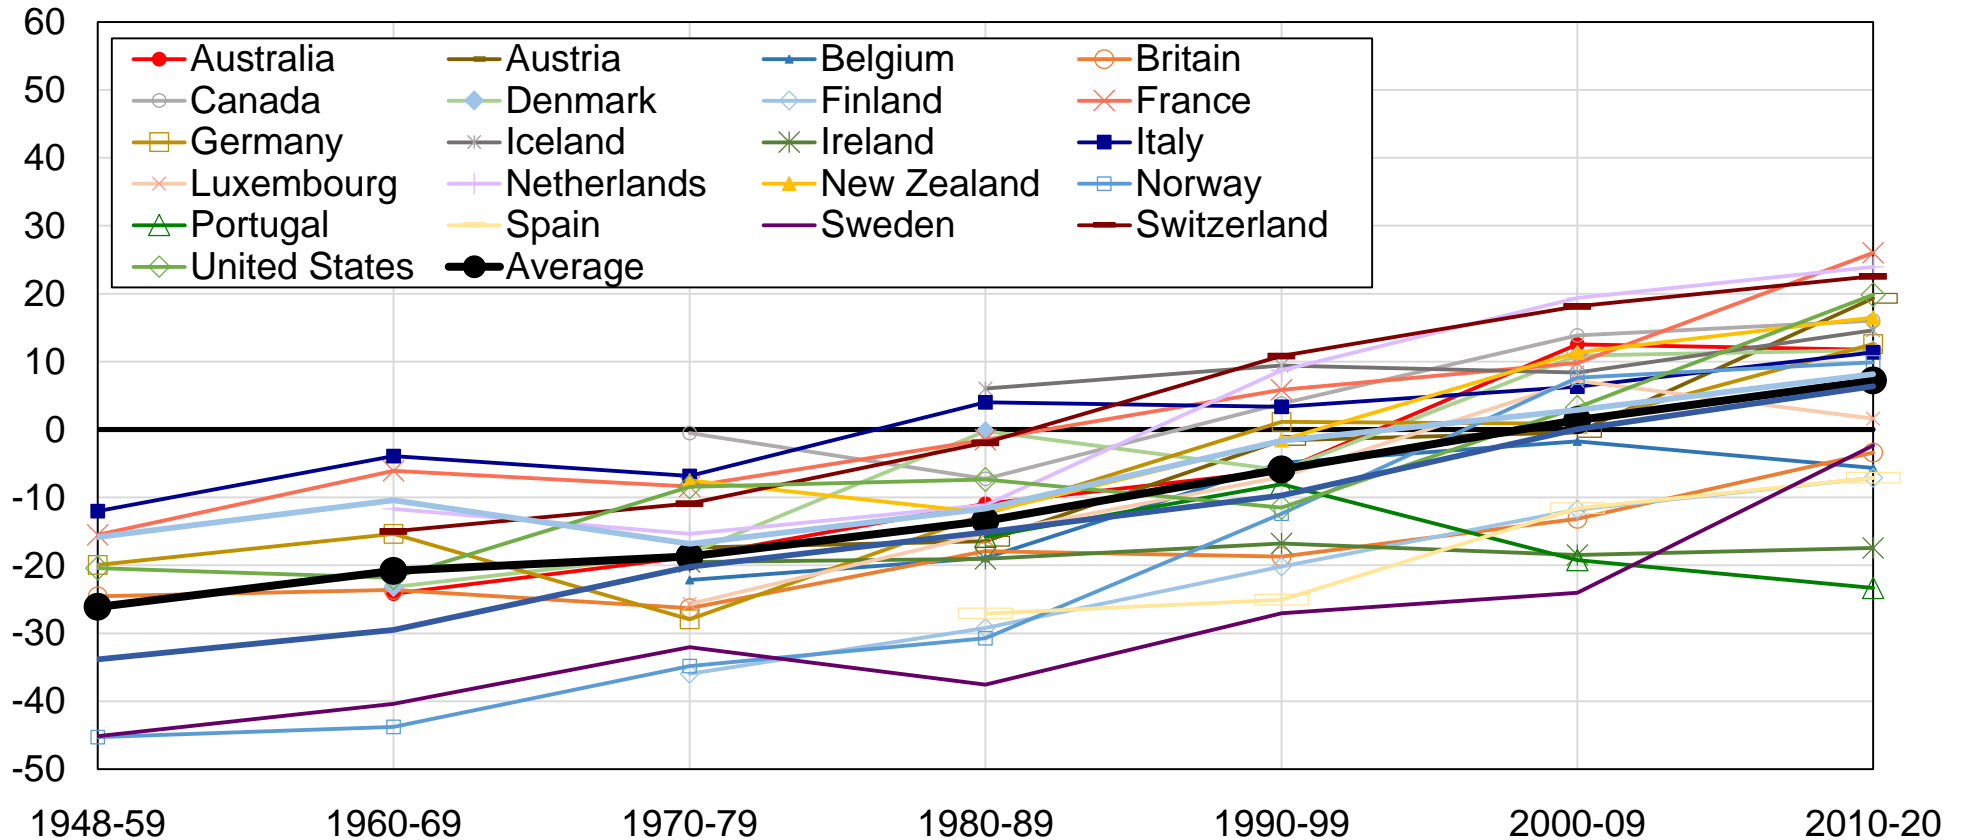

**Source:** authors' computations using the World Political Cleavages and Inequality Database.

**Note:** the figure represents the marginal effect of the education rank (quantile) of voters on support for left-wing (socialist, social democratic, communist, and green) parties in Western countries, after controlling for income, age, gender, religion, church attendance, rural/urban, region, race/ethnicity, employment status, and marital status (in country-years for which these variables are available). In nearly all countries, higher-educated voters used to be significantly more likely to vote for right-wing parties and have gradually become more likely to vote for left-wing parties.

**Figure A15 - The decline/stability of income divides in Western democracies (top 10%)**

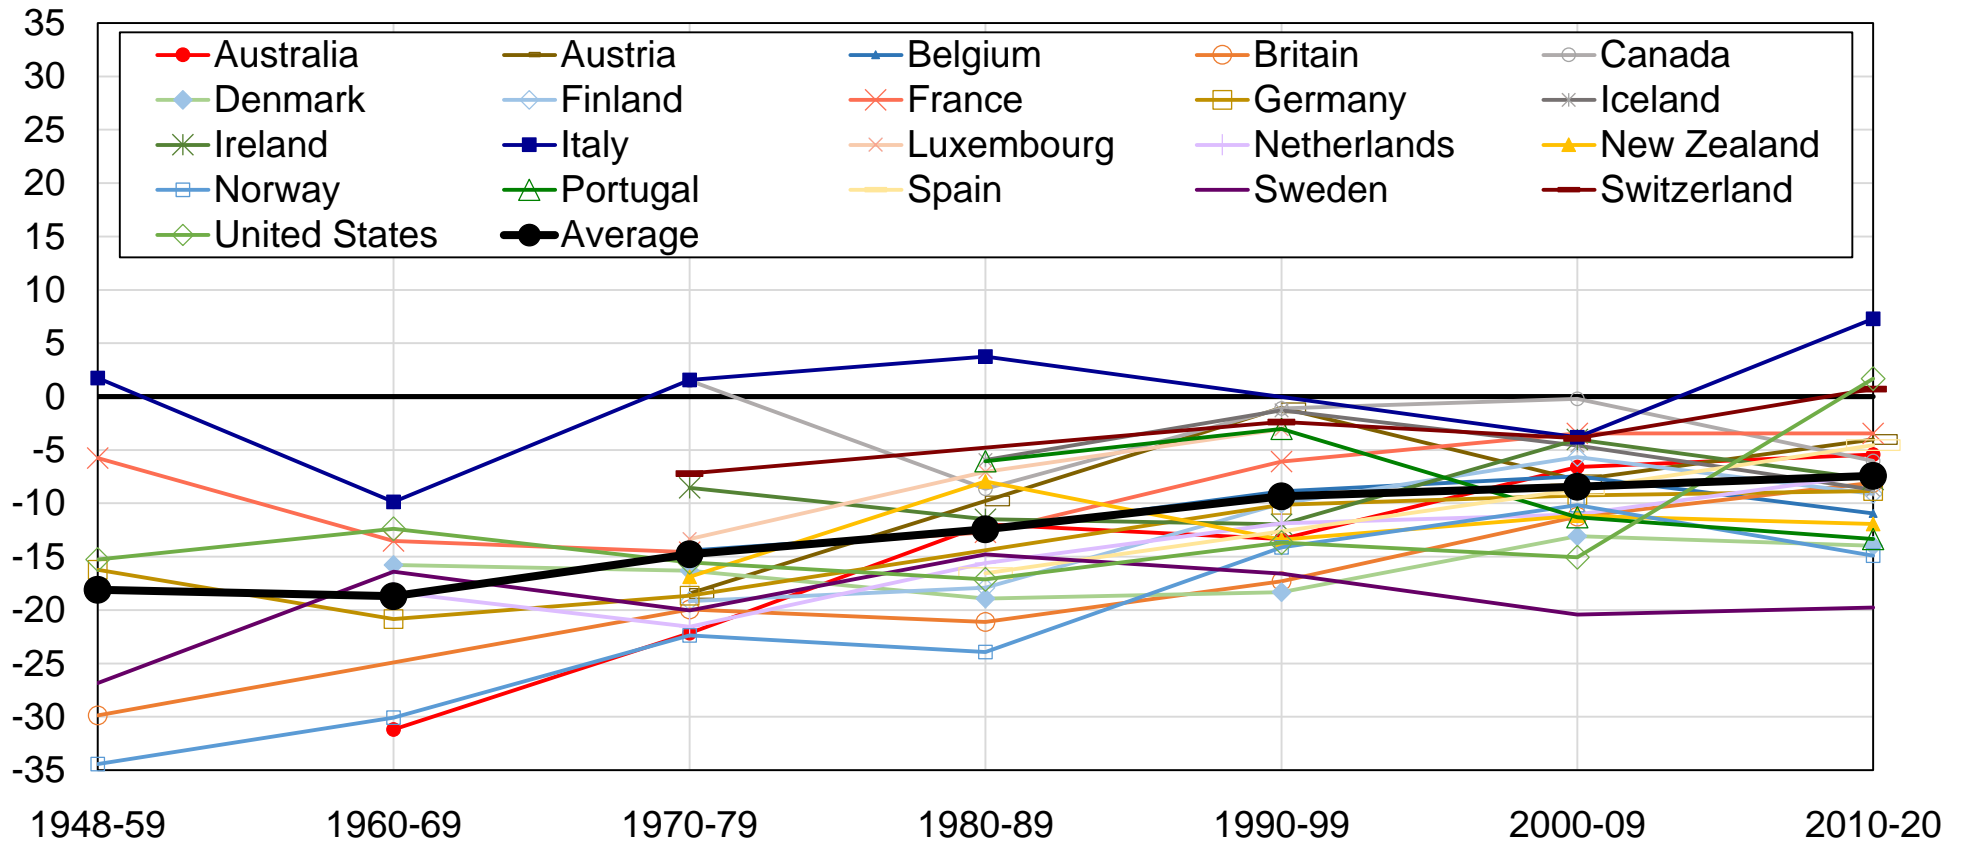

**Source:** authors' computations using the World Political Cleavages and Inequality Database.

**Note:** the figure represents the difference between the share of high-income (top 10%) and low-income (bottom 90%) voters voting for left-wing (socialist, social democratic, communist, and green) parties in Western countries. In nearly all countries, top-income voters have remained significantly less likely to vote for left-wing parties than low-income voters.

**Figure A16 - The decline/stability of income divides in Western democracies (top 10%), after controls**

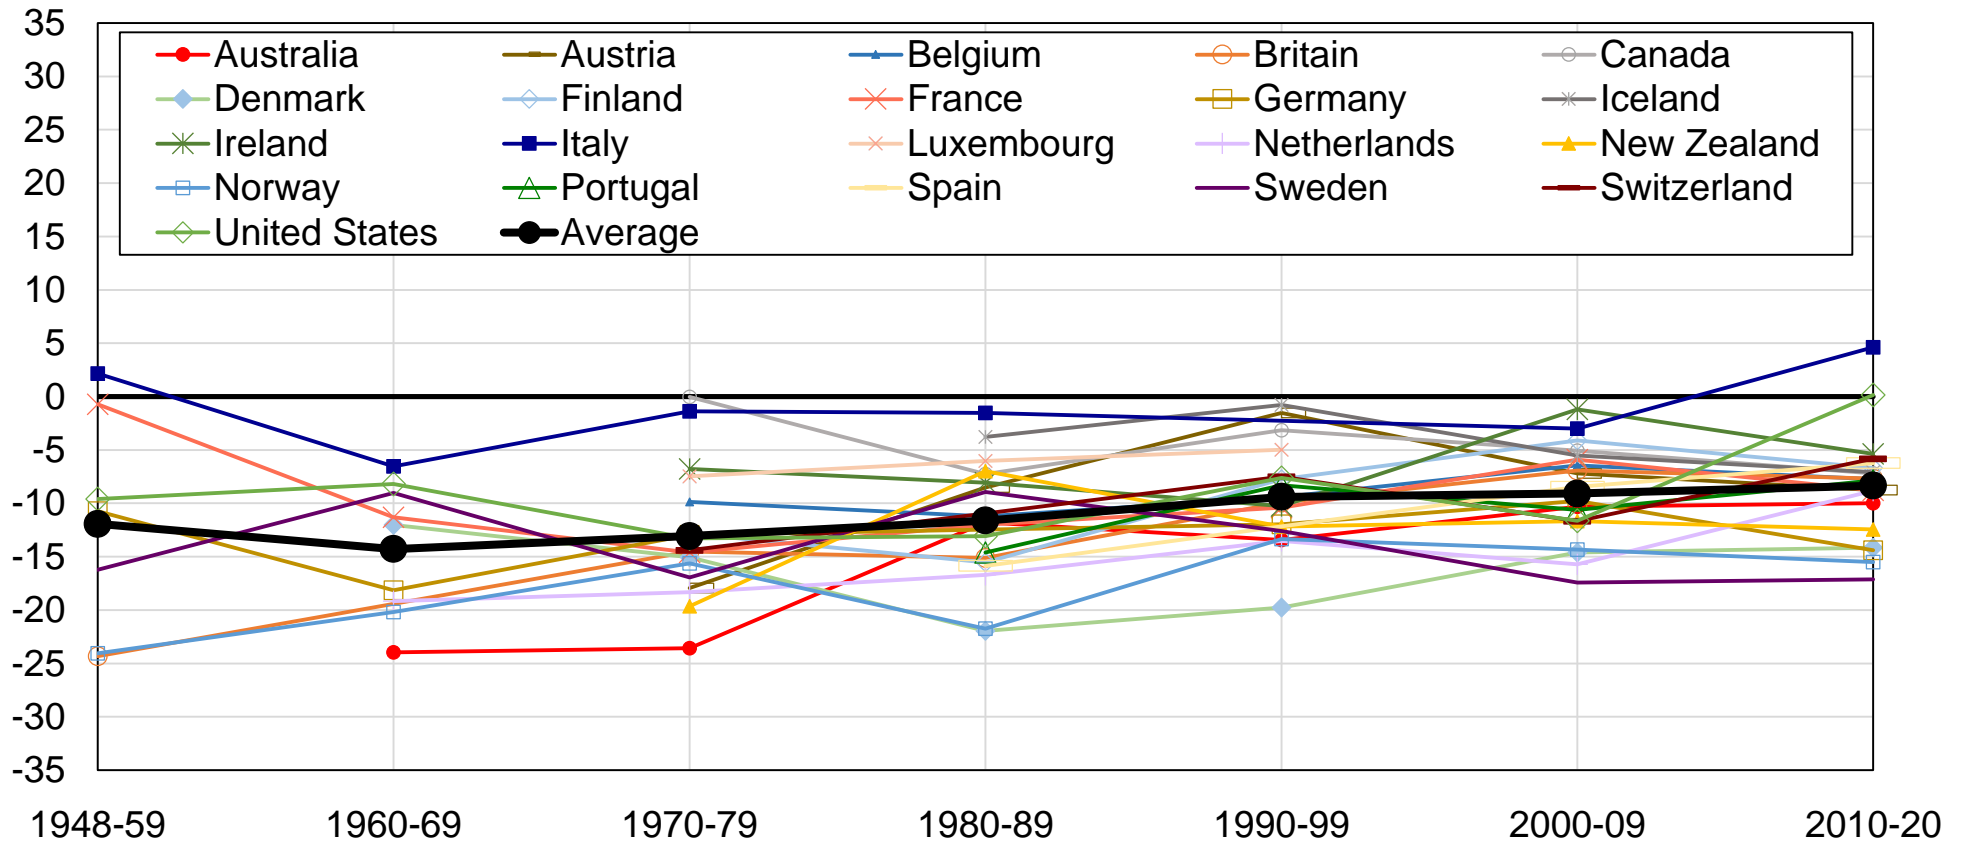

**Source:** authors' computations using the World Political Cleavages and Inequality Database.

**Note:** the figure represents the difference between the share of high-income (top 10%) and low-income (bottom 90%) voters voting for left-wing (socialist, social democratic, communist, and green) parties in Western countries. In nearly all countries, top-income voters have remained significantly less likely to vote for left-wing parties than low-income voters. Estimates control for education, age, gender, religion, church attendance, rural/urban, region, race/ethnicity, employment status, and marital status (in country-years for which these variables are available).

**Figure A17 - The decline/stability of income divides in Western democracies (bottom 50%)**

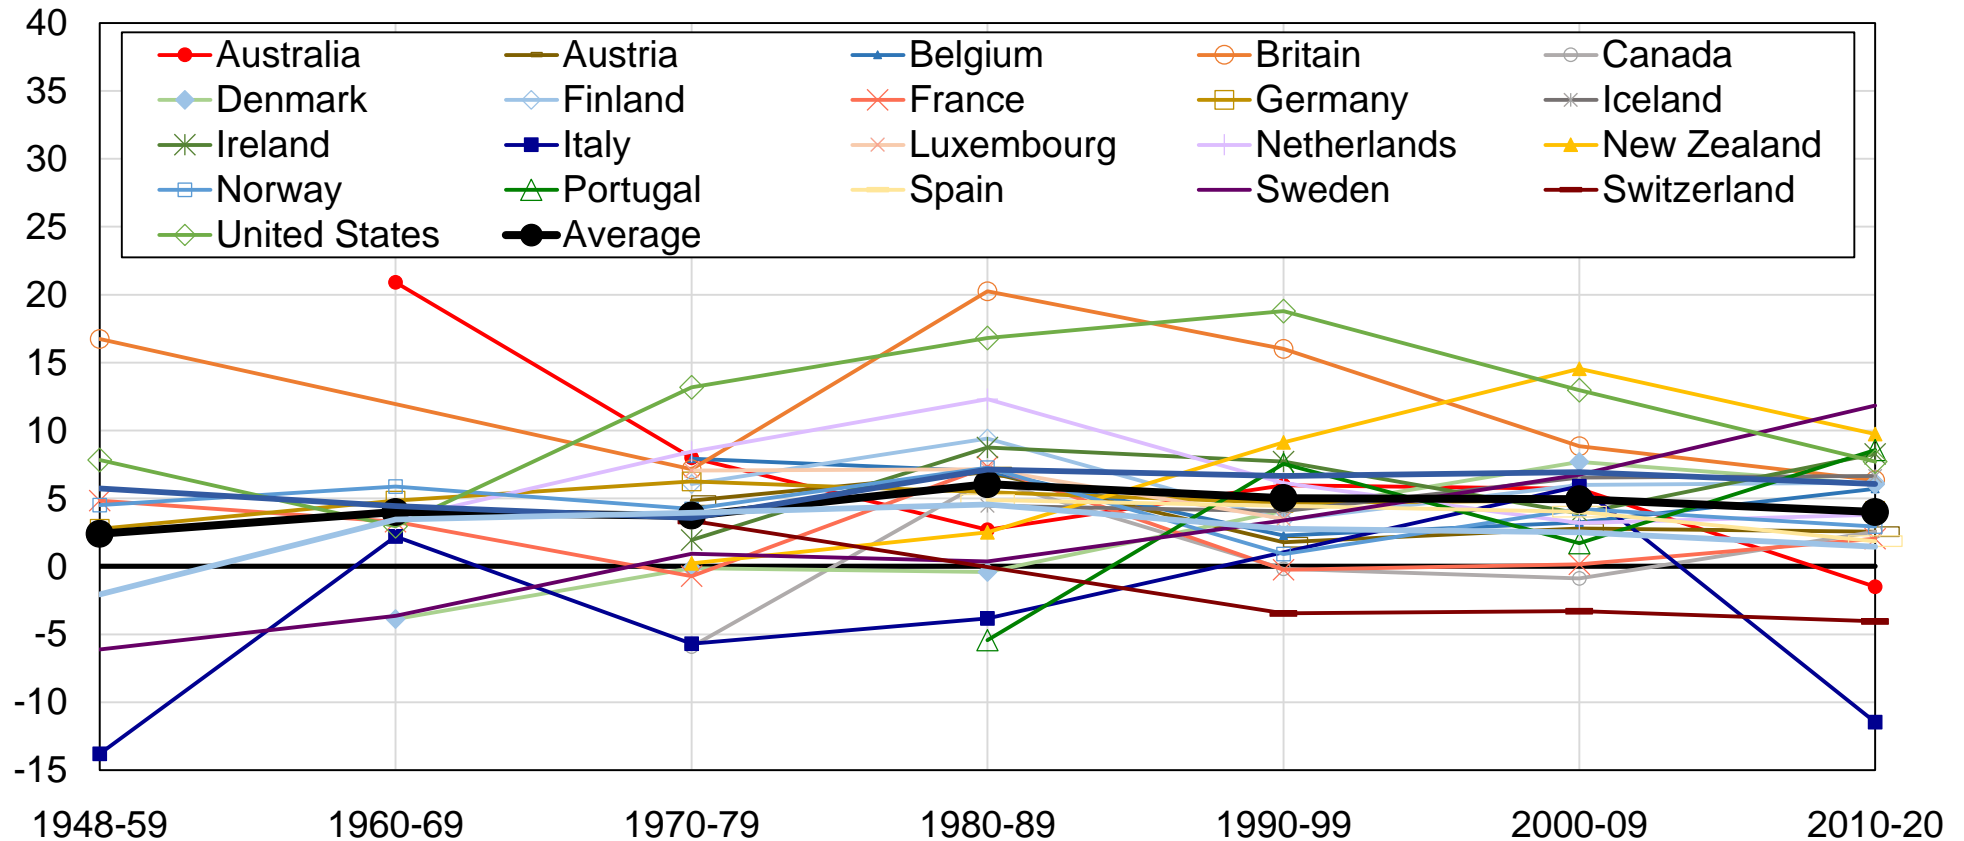

**Source:** authors' computations using the World Political Cleavages and Inequality Database.

**Note:** the figure represents the difference between the share of low-income (bottom 50%) and top-income (top 50%) voters voting for left-wing (socialist, social democratic, communist, and green) parties in Western countries. In nearly all countries, top-income voters have remained significantly less likely to vote for left-wing parties than low-income voters.

**Figure A18 - The decline/stability of income divides in Western democracies (bottom 50%), after controls**

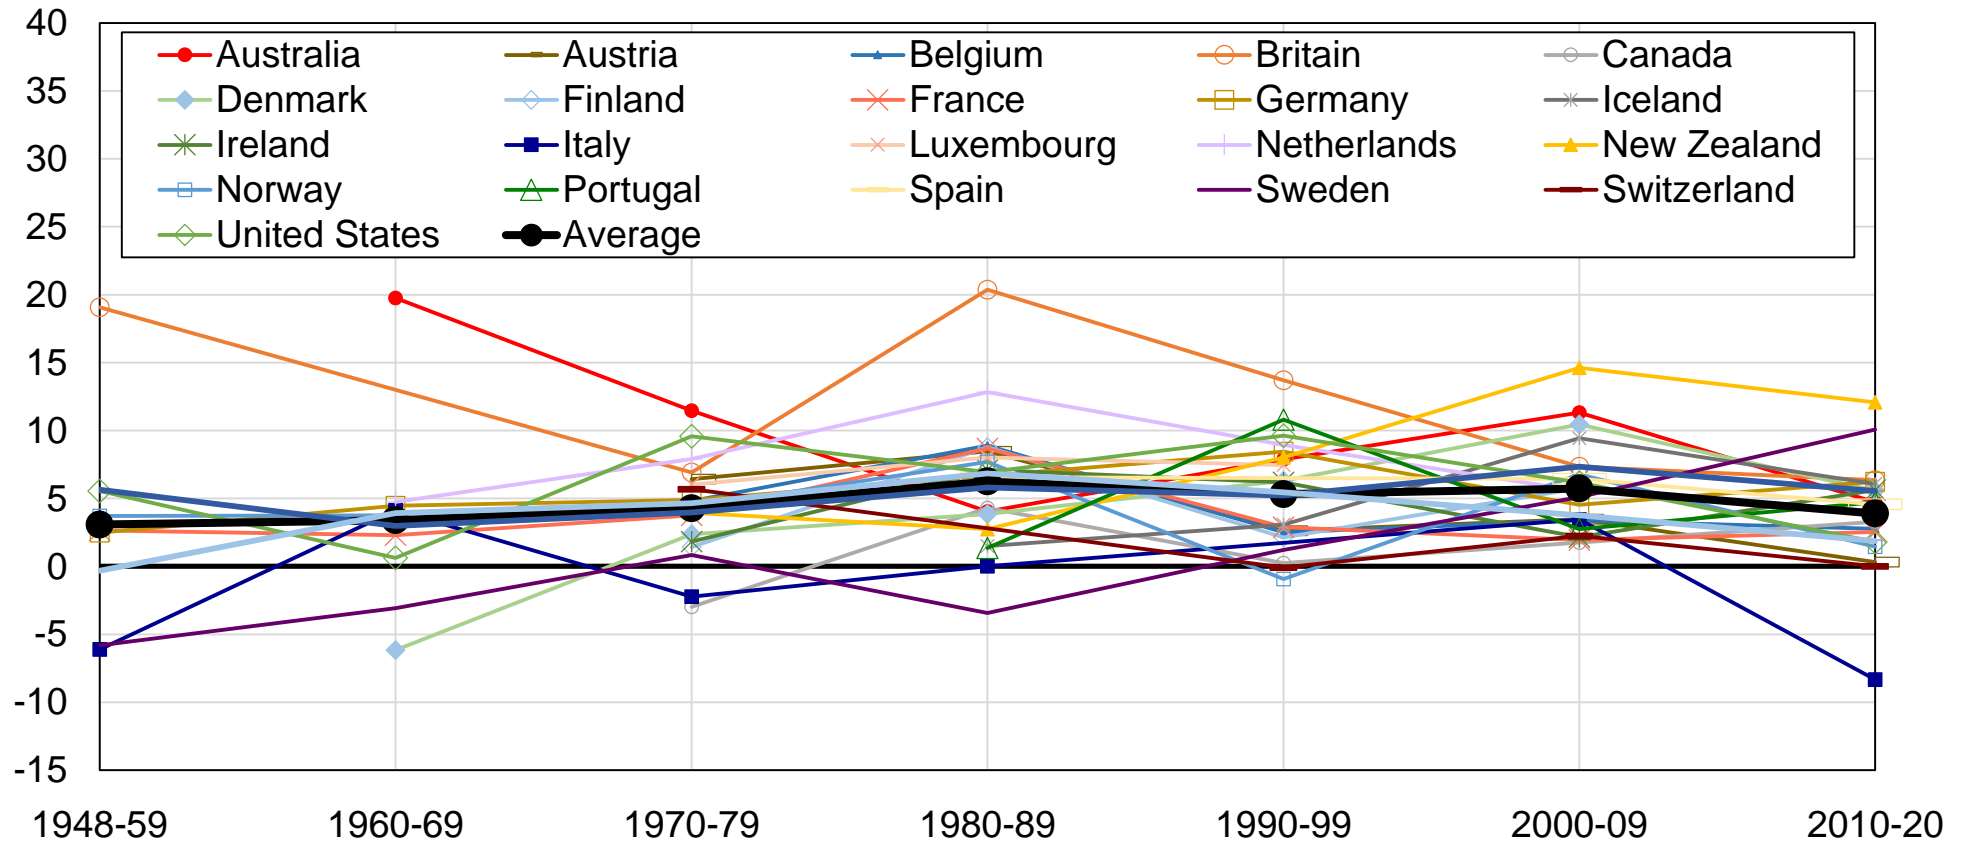

**Source:** authors' computations using the World Political Cleavages and Inequality Database.

**Note:** the figure represents the difference between the share of low-income (bottom 50%) and top-income (top 50%) voters voting for left-wing (socialist, social democratic, communist, and green) parties in Western countries. In nearly all countries, top-income voters have remained significantly less likely to vote for left-wing parties than low-income voters. Estimates control for education, age, gender, religion, church attendance, rural/urban, region, race/ethnicity, employment status, and marital status (in country-years for which these variables are available).

**Figure A19 - The decline/stability of income divides in Western democracies (continuous variable)**

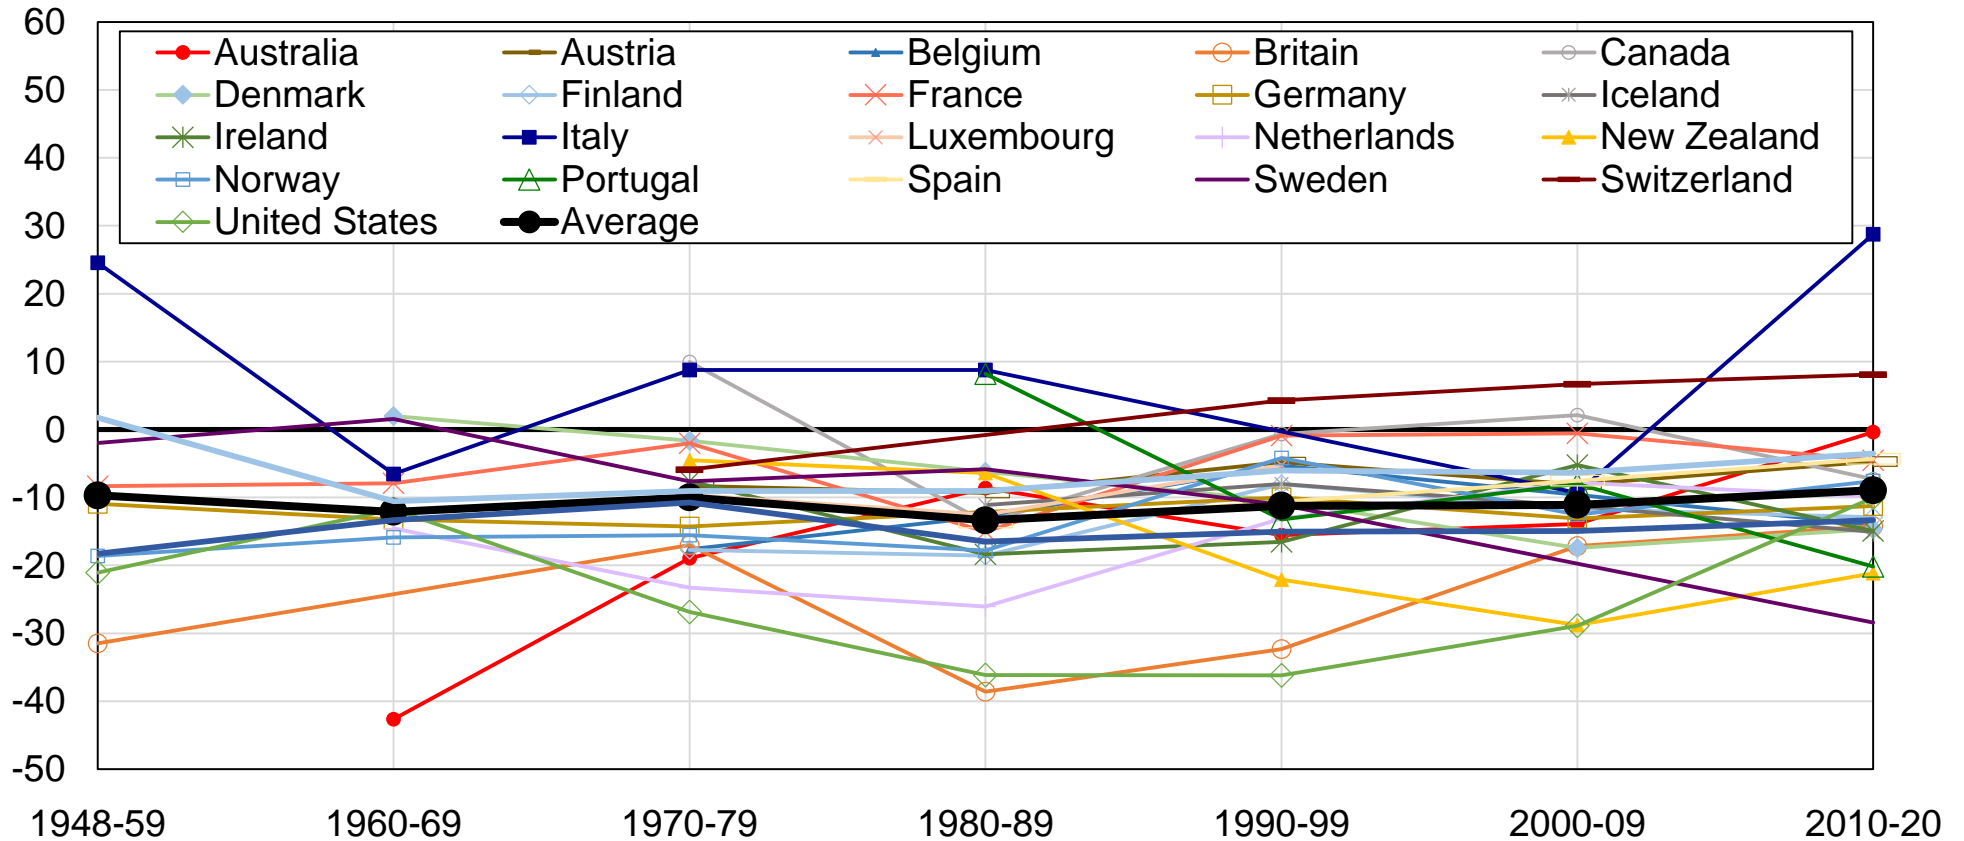

**Source:** authors' computations using the World Political Cleavages and Inequality Database.

**Note:** the figure represents the marginal effect of the income rank (quantile) of voters on support for left-wing (socialist, social democratic, communist, and green) parties in Western countries. In nearly all countries, top-income voters have remained significantly less likely to vote for left-wing parties than low-income voters.

**Figure A20 - The decline/stability of income divides in Western democracies (continuous variable), after controls**

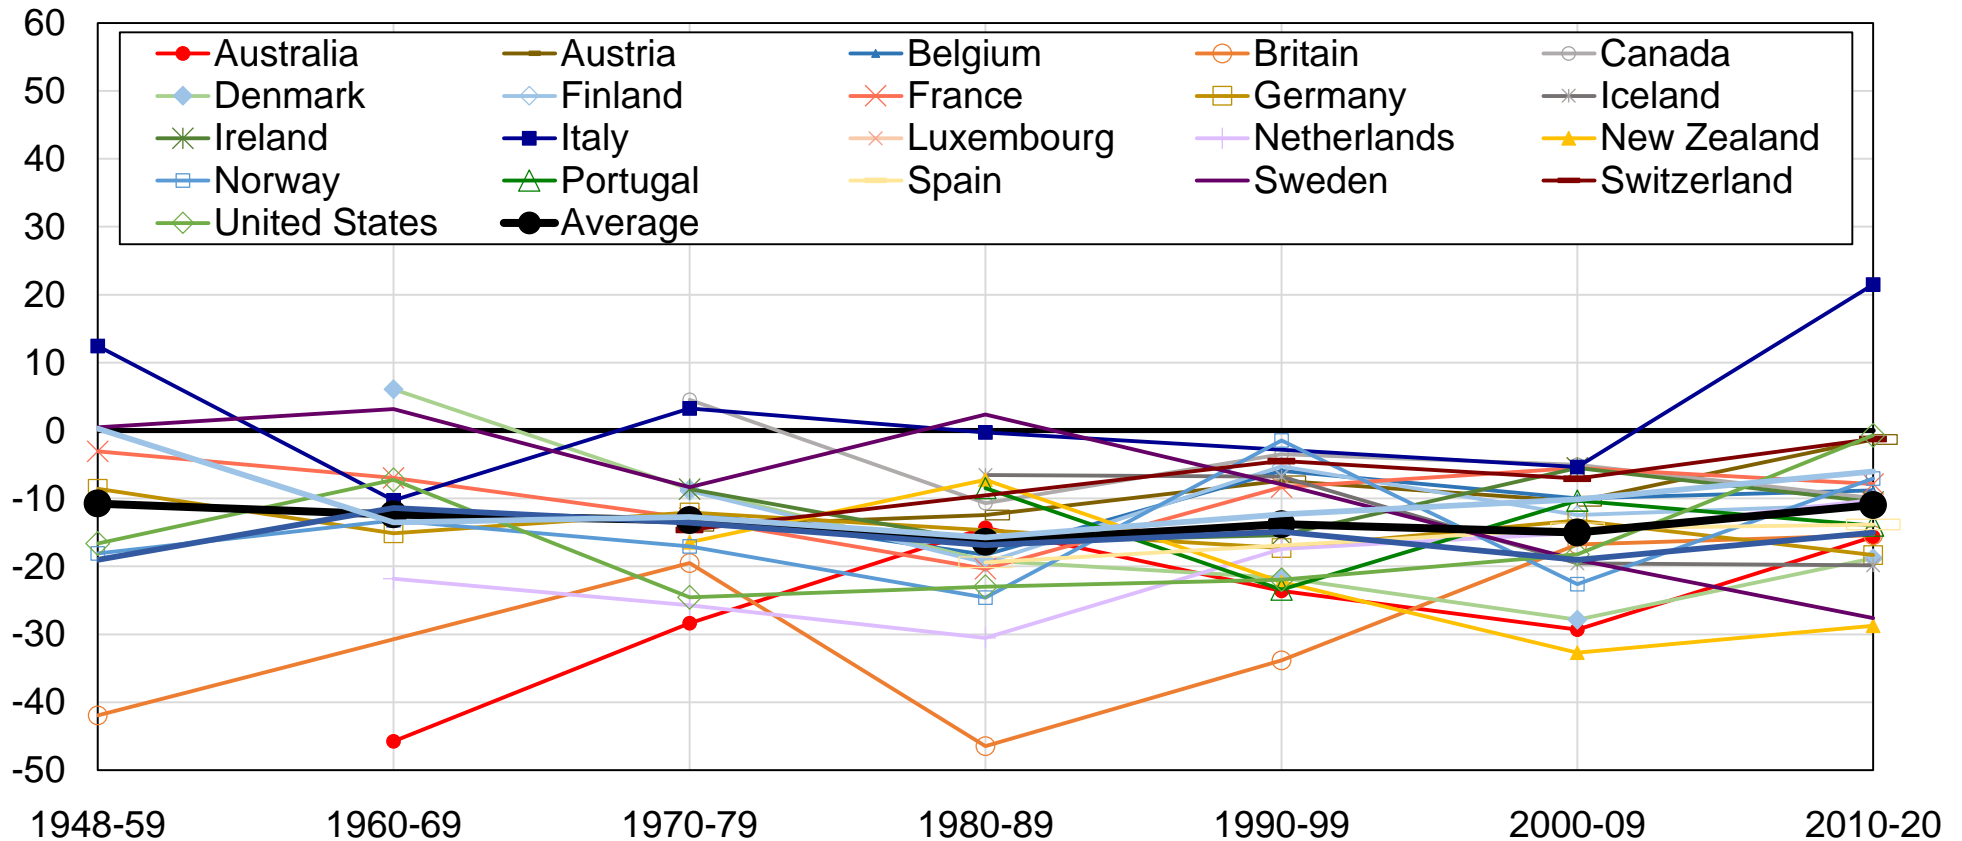

**Source:** authors' computations using the World Political Cleavages and Inequality Database.

**Note:** the figure represents the marginal effect of the income rank (quantile) of voters on support for left-wing (socialist, social democratic, communist, and green) parties in Western countries. In nearly all countries, top-income voters have remained significantly less likely to vote for left-wing parties than low-income voters. Estimates control for education, age, gender, religion, church attendance, rural/urban, region, race/ethnicity, employment status, and marital status (in country-years for which these variables are available).

**Figure A21 - The disconnection of income and education in Western democracies (including/excluding green parties)**

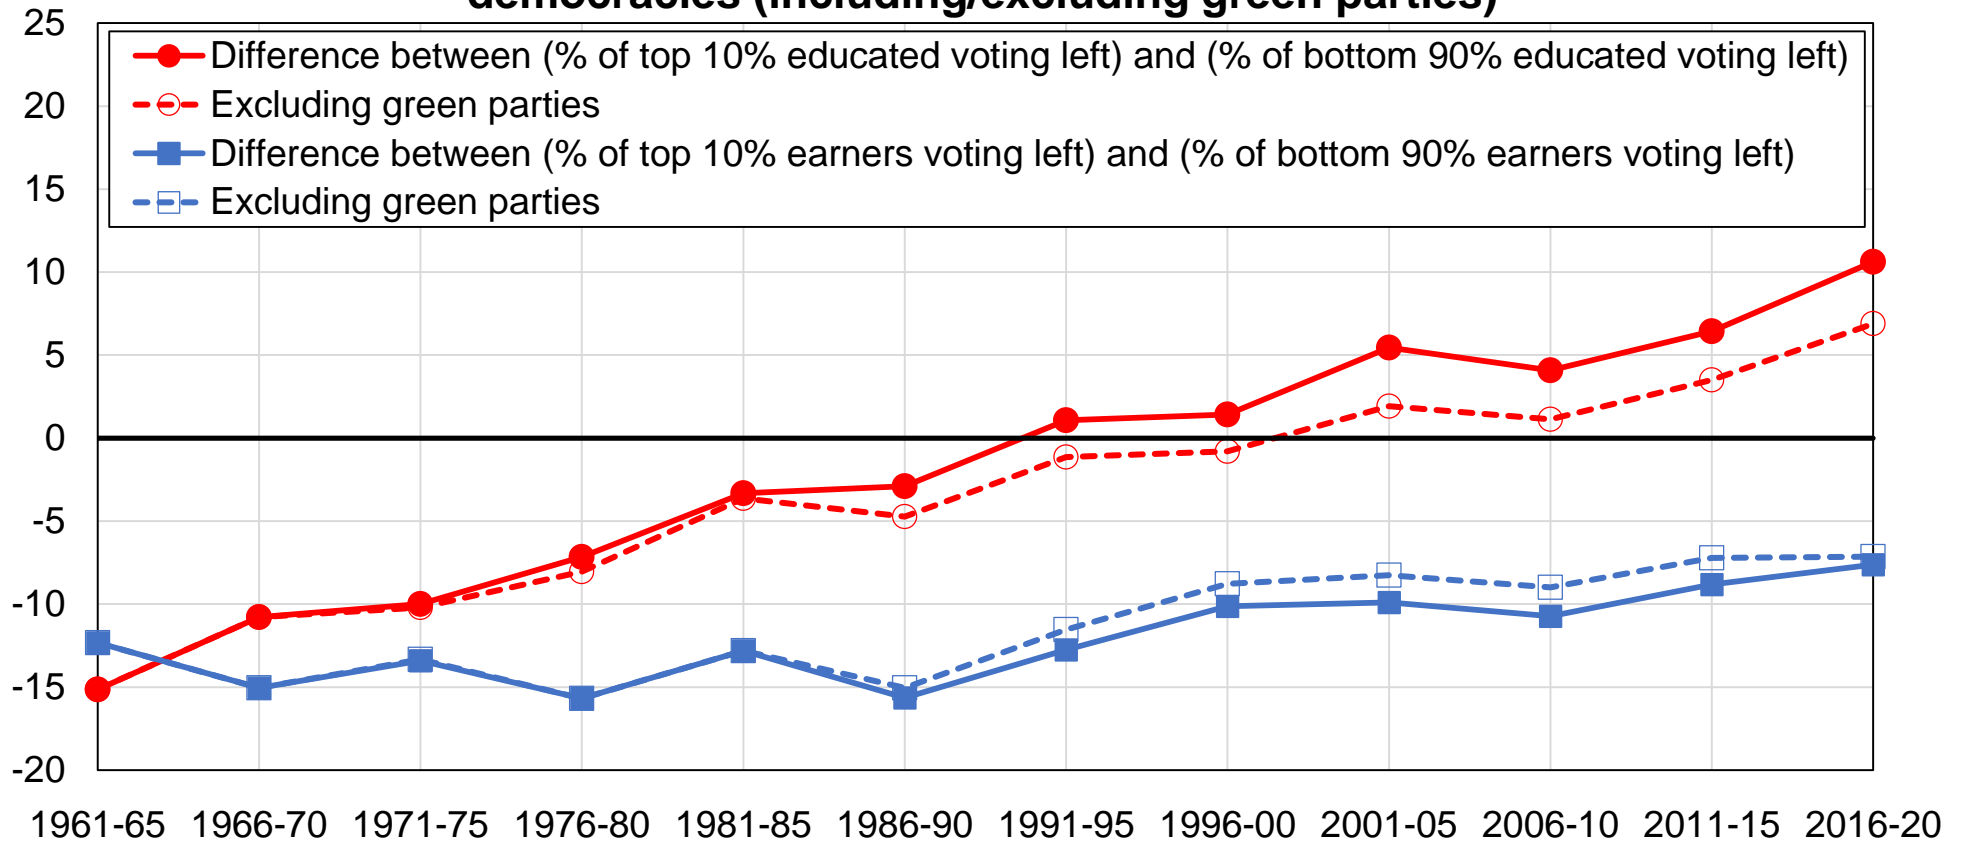

**Source:** authors' computations using the World Political Cleavages and Inequality Database.

**Note:** in the 1960s, both higher-educated and high-income voters were less likely to vote for left-wing (social democratic / socialist / communist / green / other left-wing) parties than lower-educated and low-income voters by more than 10 percentage points. The left vote has gradually become associated with higher education voters, giving rising to a remarkable divergence of the effects of income and education on the vote. Figures correspond to five-year averages for Australia, Britain, Canada, Denmark, France, Germany, Italy, the Netherlands, Norway, Sweden, Switzerland, and the US. The estimates are presented after controlling for income/education, age, gender, religion, church attendance, rural/urban, region, race/ethnicity, employment status, and marital status (in country-years for which these variables are available).



**Figure A22 - The disconnection of income and education cleavages in Western democracies (incl./excl. green parties), unbalanced panel**

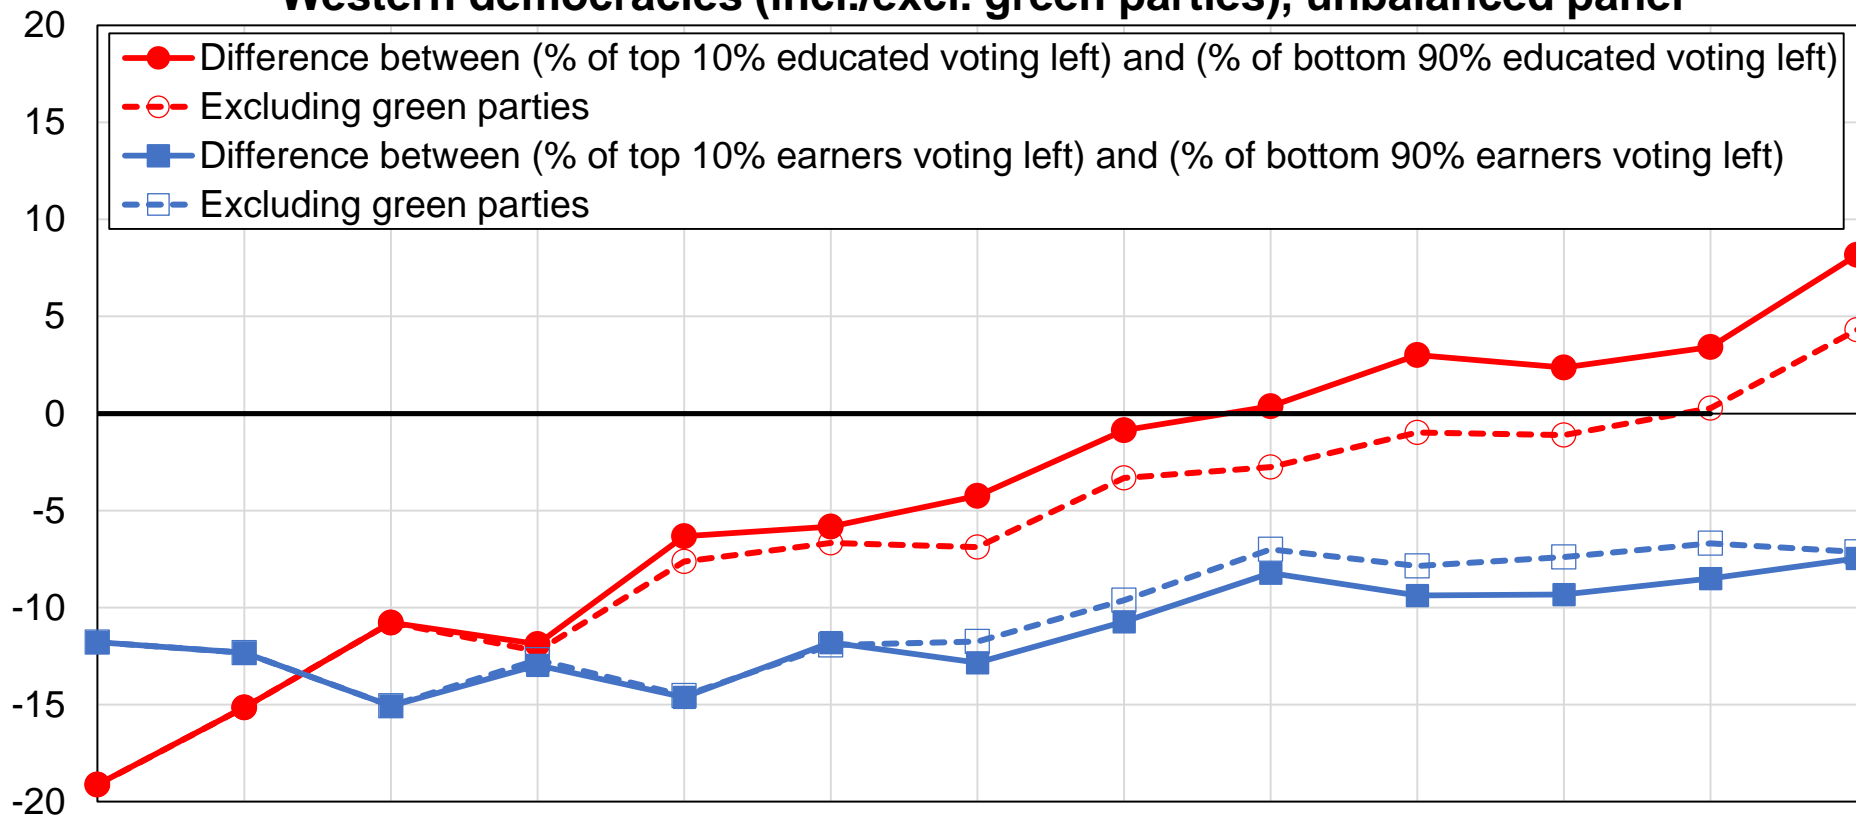

1948-60 1961-65 1966-70 1971-75 1976-80 1981-85 1986-90 1991-95 1996-00 2001-05 2006-10 2011-15 2016-20

**Source:** authors' computations using the World Political Cleavages and Inequality Database.

**Note:** in the 1960s, both higher-educated and high-income voters were less likely to vote for left-wing (social democratic / socialist / communist / green / other left-wing) parties than lower-educated and low-income voters by more than 10 percentage points. The left vote has gradually become associated with higher education voters, giving rising to a remarkable divergence of the effects of income and education on the vote. Figures correspond to five-year averages over all countries available for a given time period (unbalanced panel of all 21 Western democracies). The estimates are presented before and after controlling for income/education, age, gender, religion, church attendance, rural/urban, region, race/ethnicity, employment status, and marital status (in country-years for which these variables are available).

**Figure A23 - Support for left-wing parties (excluding Greens) among top 10% educated voters, after controls**

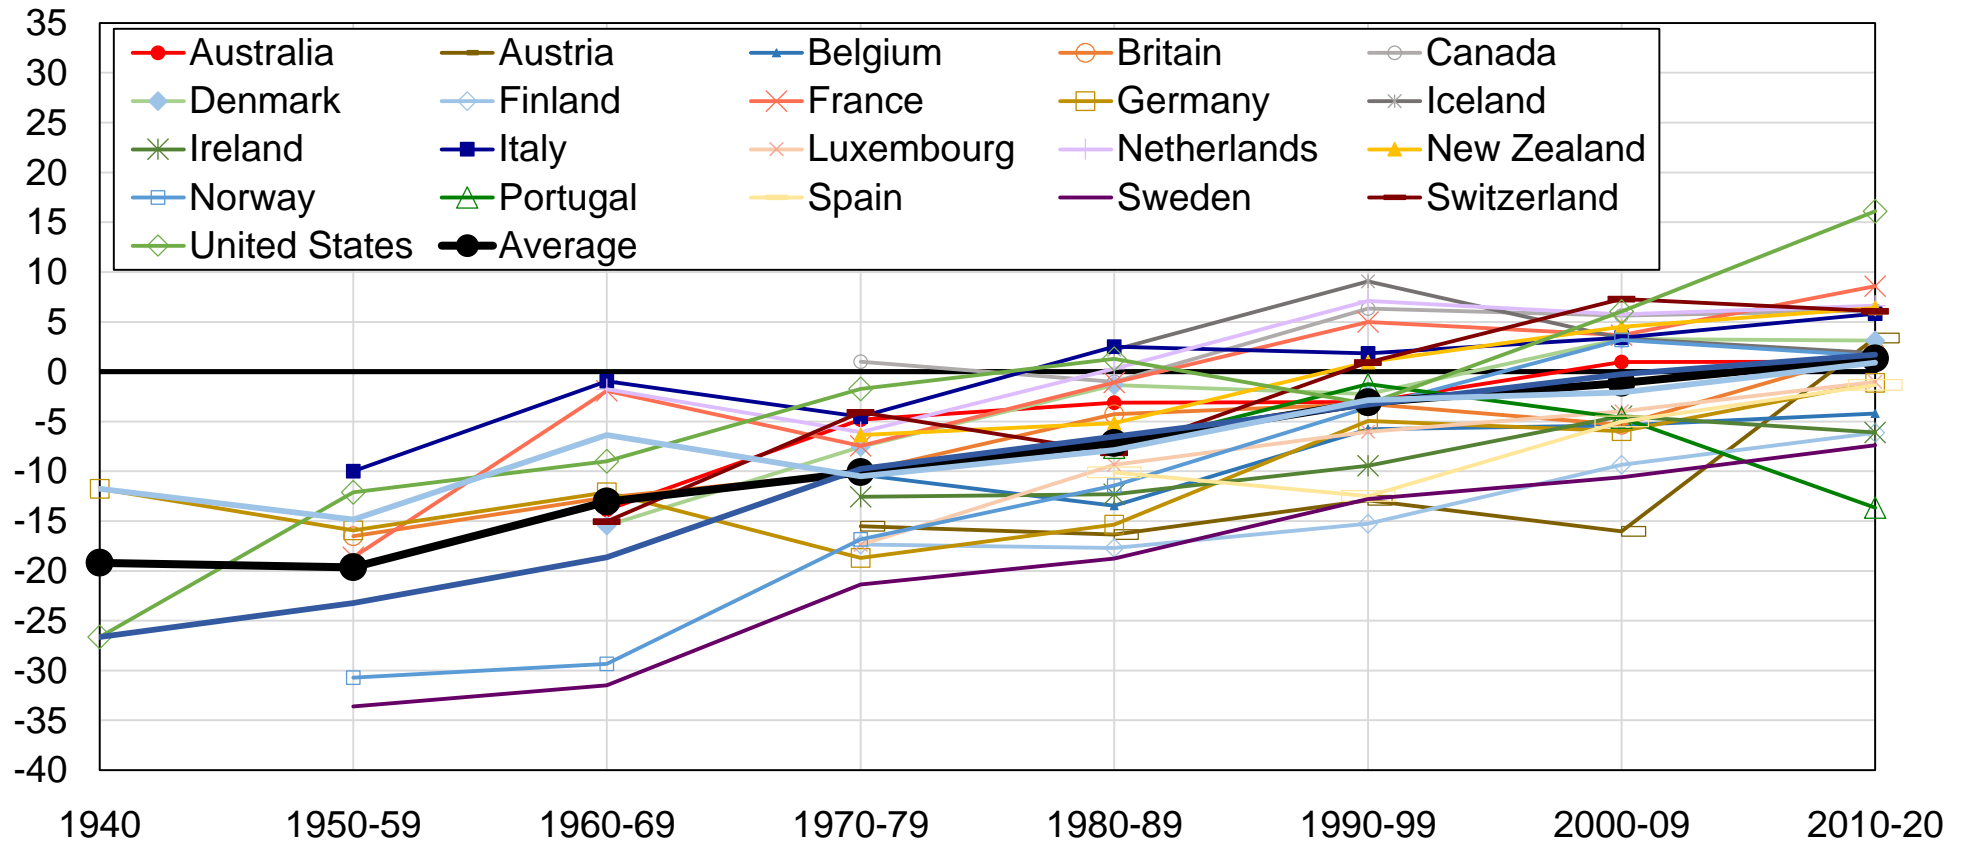

**Source:** authors' computations using the World Political Cleavages and Inequality Database.

**Note:** the figure represents the difference between the share of higher-educated (top 10%) and lower-educated (bottom 90%) voters voting for left-wing parties (excluding Greens) in Western countries, after controlling for income, age, gender, religion, church attendance, rural/urban, region, race/ethnicity, employment status, and marital status (in country-years for which these variables are available). In nearly all countries, higher-educated voters used to be significantly more likely to vote for right-wing parties and have gradually become more likely to vote for left-wing parties.

**Figure A24 - Support for left-wing parties (excluding Greens) among top 10% income voters, after controls**

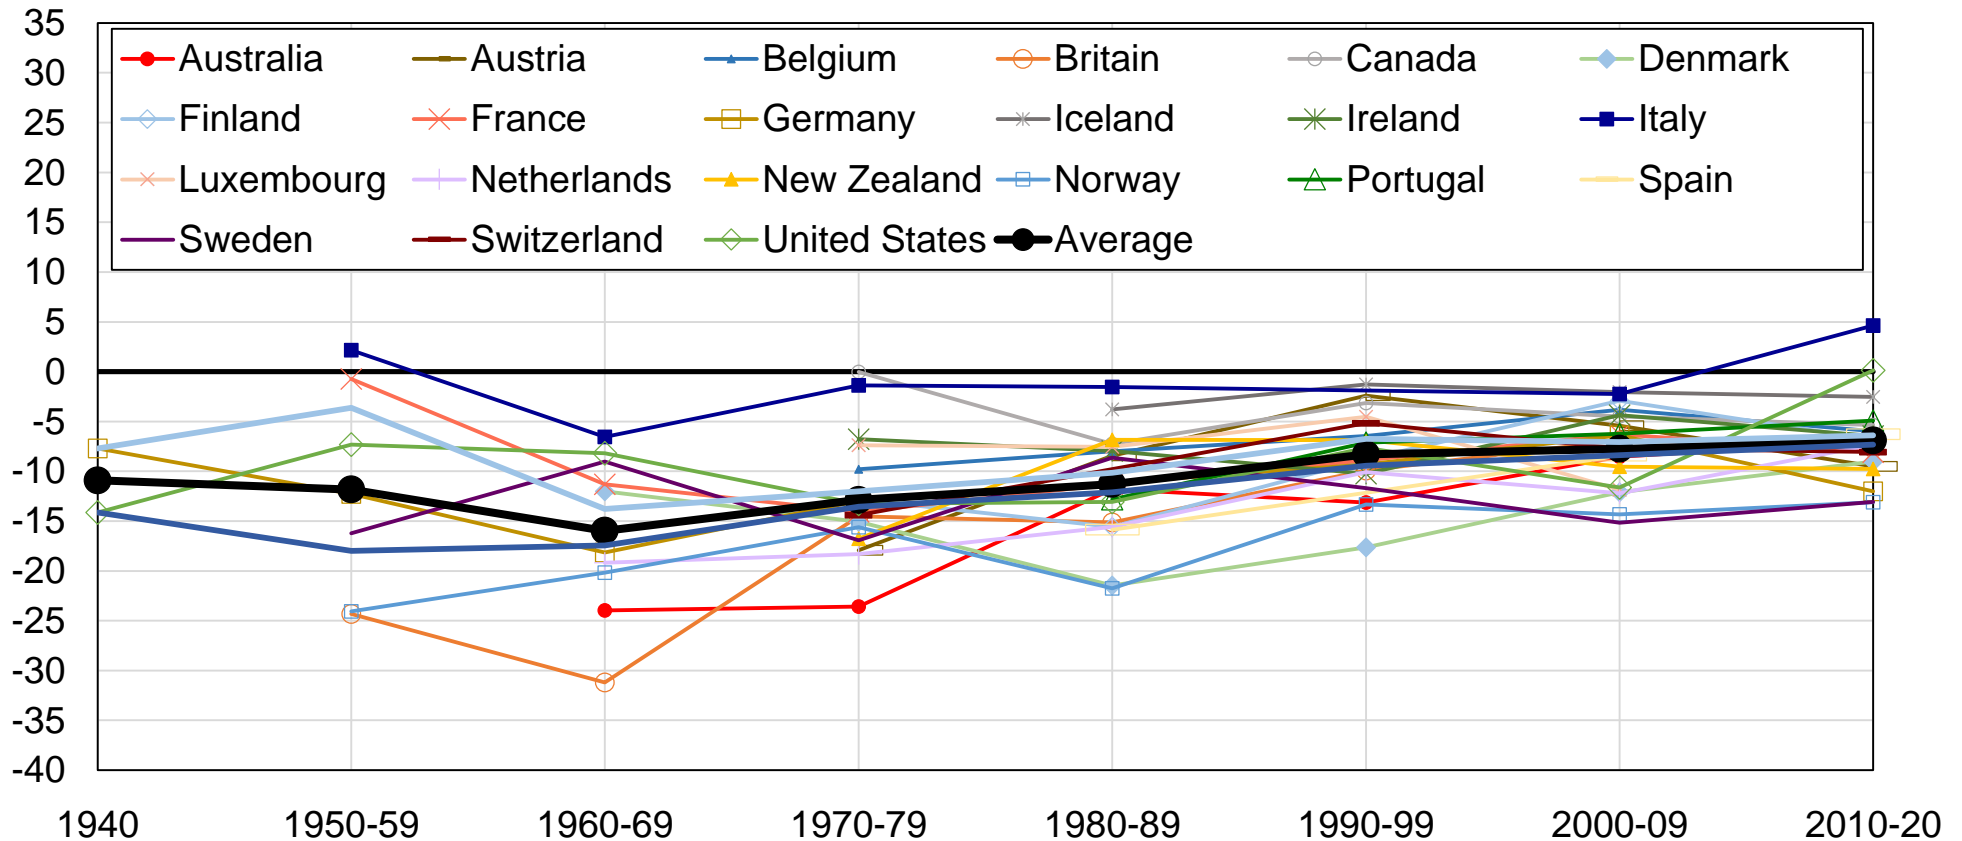

**Source:** authors' computations using the World Political Cleavages and Inequality Database.

**Note:** the figure represents the difference between the share of high-income (top 10%) and low-income (bottom 90%) voters voting for left-wing parties (excluding Greens) in Western countries. In nearly all countries, top-income voters have remained significantly less likely to vote for left-wing parties than low-income voters. Estimates control for education, age, gender, religion, church attendance, rural/urban, region, race/ethnicity, employment status, and marital status (in country-years for which these variables are available).

**Figure A25 - The reversal of educational divides in Western democracies: decomposition by party family (left-wing parties)**

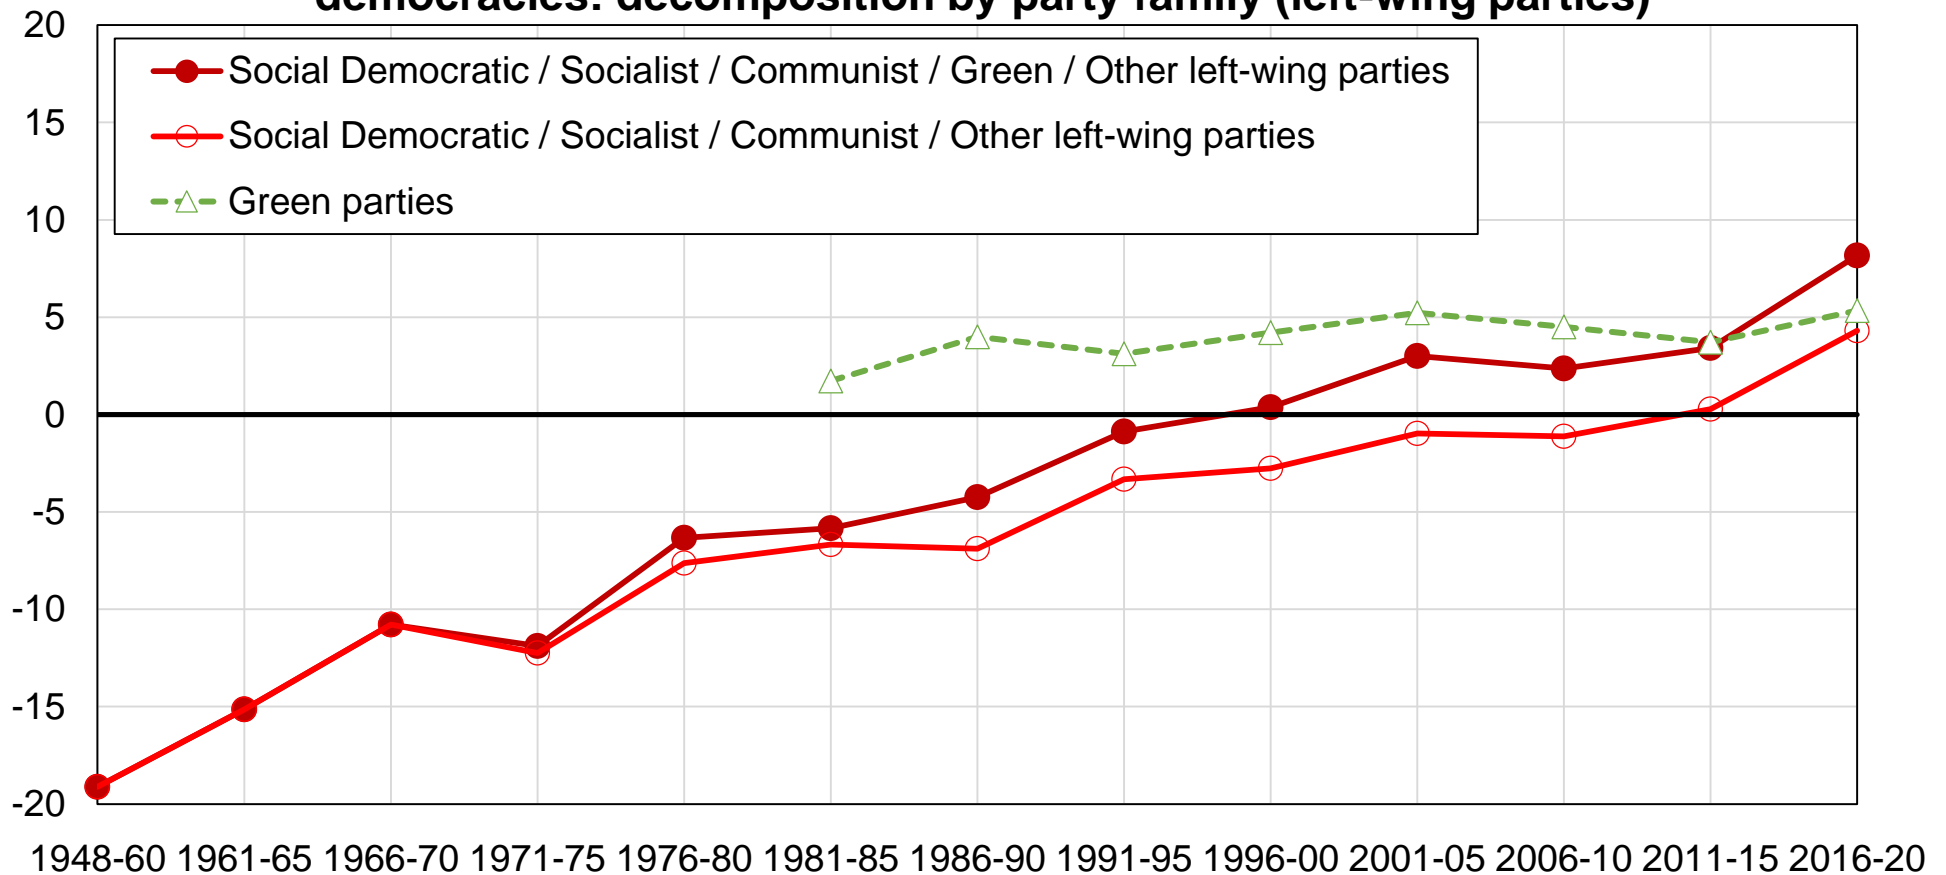

**Source:** authors' computations using the World Political Cleavages and Inequality Database.

**Note:** the figure represents the difference between the share of top 10% educated voters and the share of bottom 90% educated voters voting for specific families of parties. Figures correspond to five-year averages over all countries available for a given time period (unbalanced panel of all 21 Western democracies). The estimates are presented after controlling for income, age, gender, religion, church attendance, rural/urban, region, race/ethnicity, employment status, and marital status (in country-years for which these variables are available).

**Figure A26 - The reversal of educational divides in Western democracies: decomposition by party family (right-wing parties)**

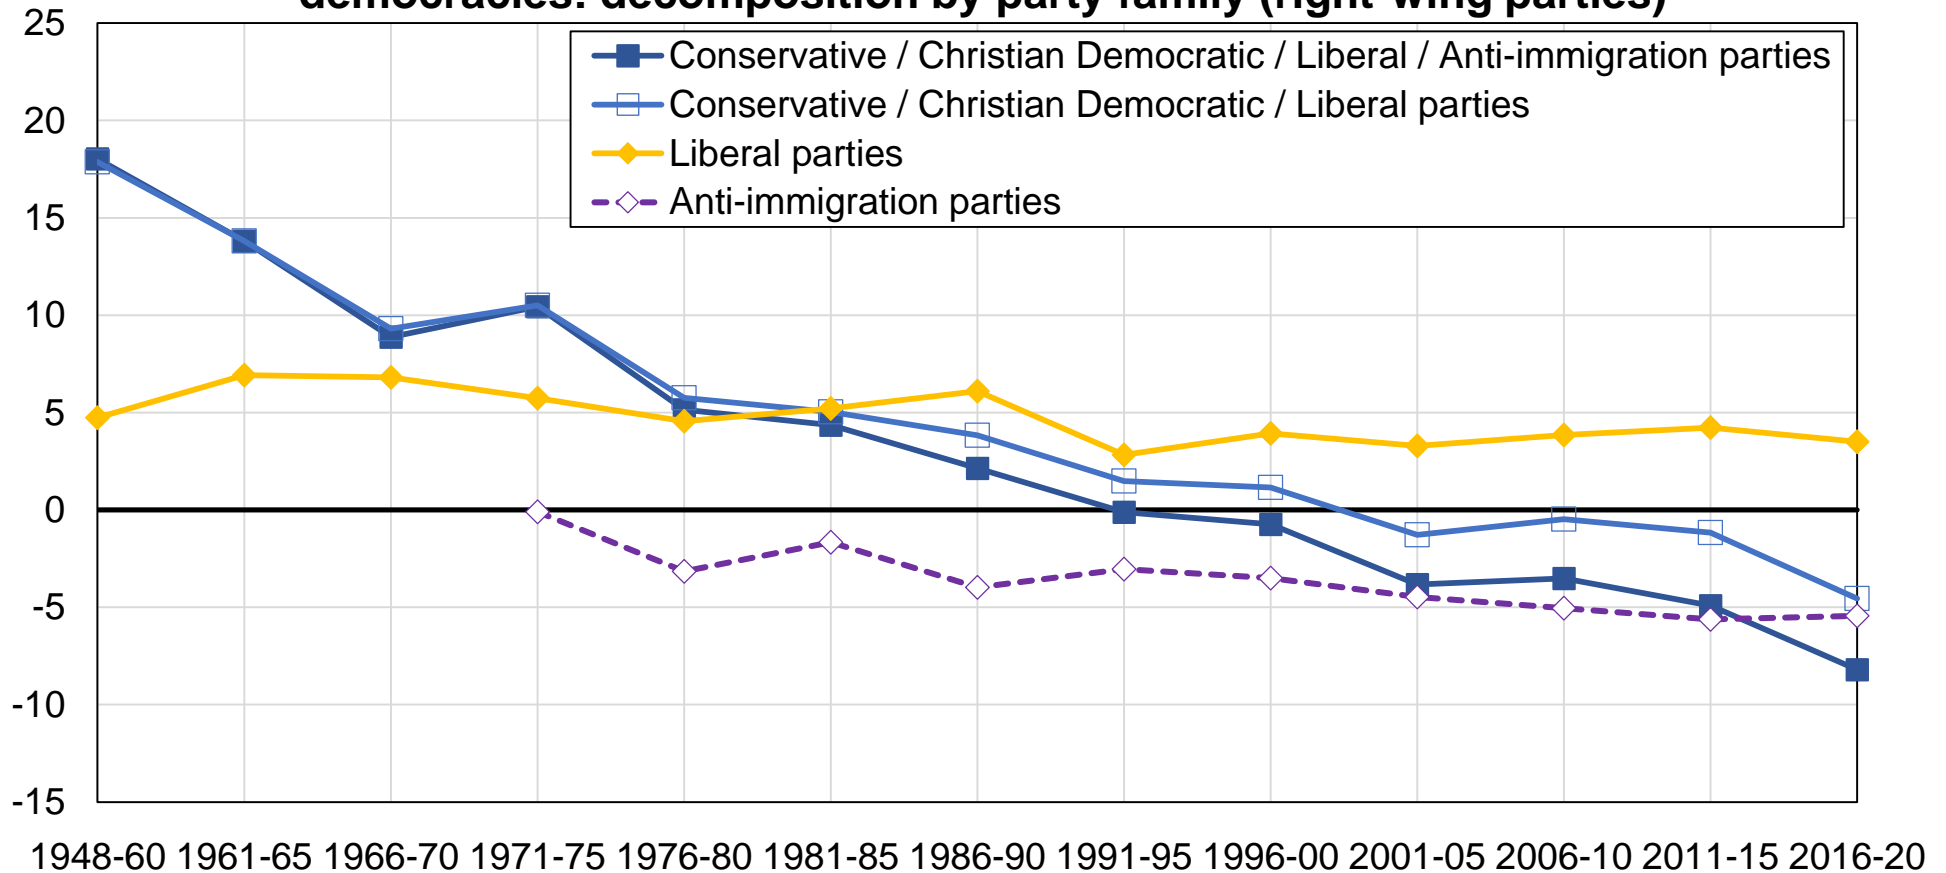

**Source:** authors' computations using the World Political Cleavages and Inequality Database.

**Note:** the figure represents the difference between the share of top 10% educated voters and the share of bottom 90% educated voters voting for specific families of parties. Figures correspond to five-year averages over all countries available for a given time period (unbalanced panel of all 21 Western democracies). The estimates are presented after controlling for income, age, gender, religion, church attendance, rural/urban, region, race/ethnicity, employment status, and marital status (in country-years for which these variables are available).

**Figure A27 - The decline/stability of income divides in Western democracies: decomposition by party family (left-wing parties)**

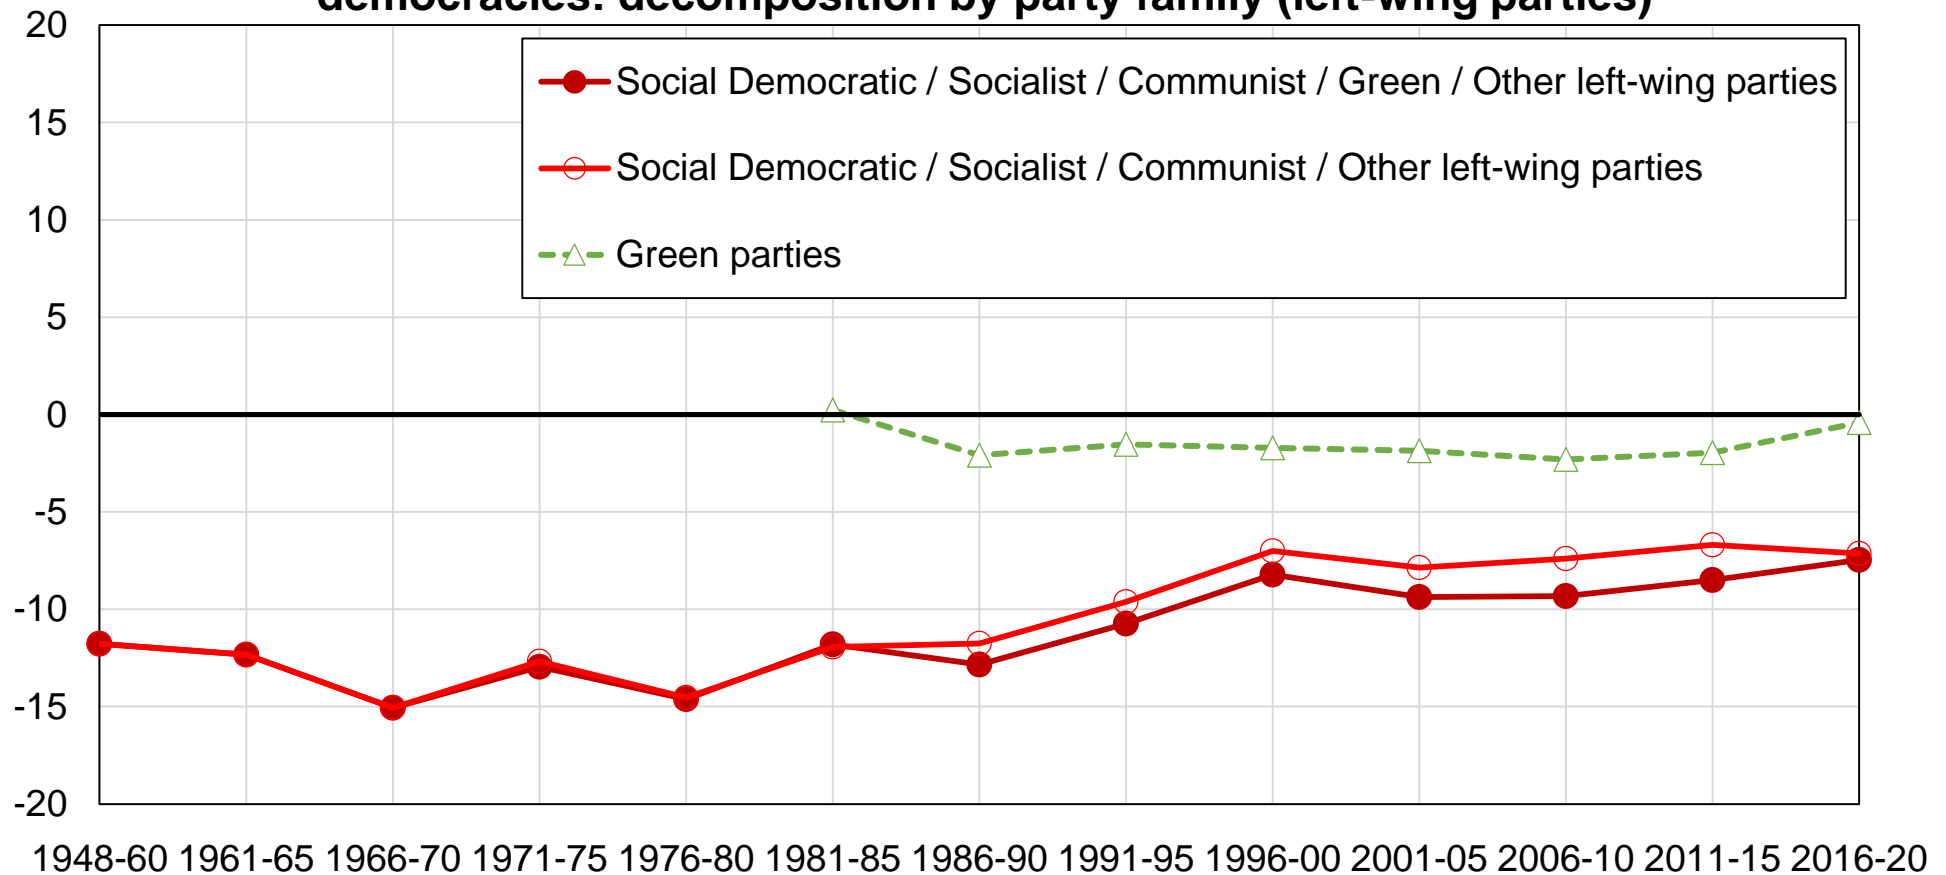

**Source:** authors' computations using the World Political Cleavages and Inequality Database.

**Note:** the figure represents the difference between the share of top 10% income voters and the share of bottom 90% income voters voting for specific families of parties. Figures correspond to five-year averages over all countries available for a given time period (unbalanced panel of all 21 Western democracies). The estimates are presented after controlling for education, age, gender, religion, church attendance, rural/urban, region, race/ethnicity, employment status, and marital status (in country-years for which these variables are available).

**Figure A28 - The decline/stability of income divides in Western democracies: decomposition by party family (left-wing parties)**

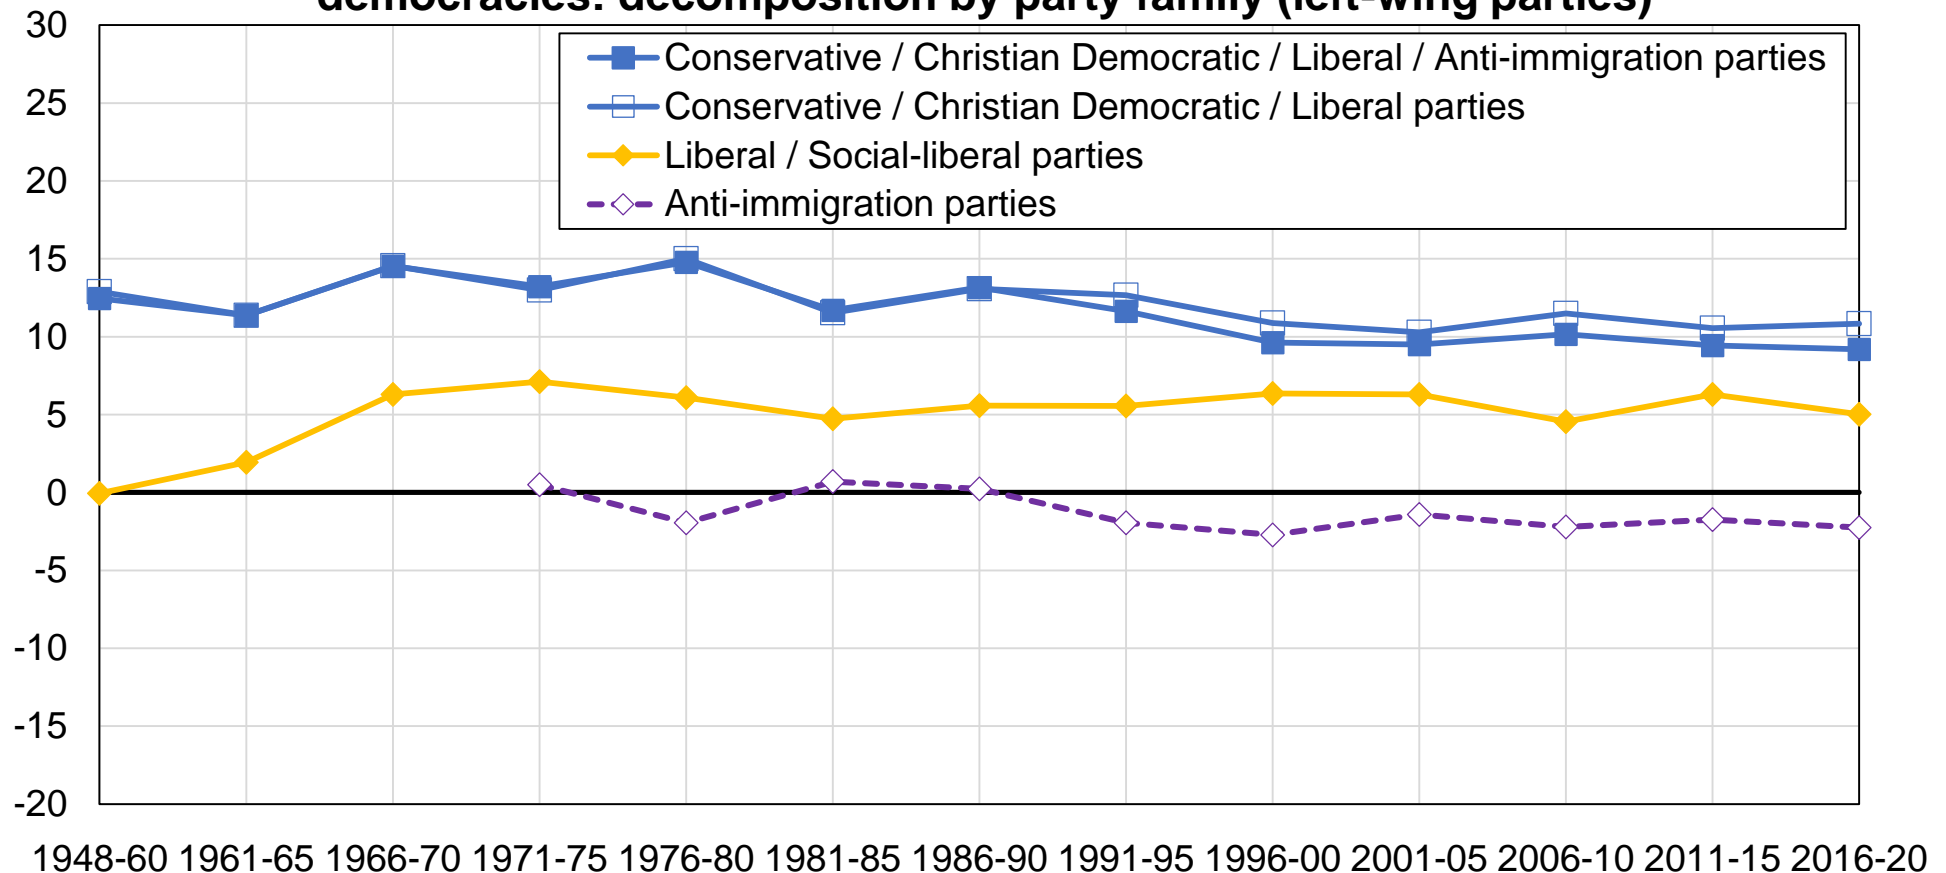

**Source:** authors' computations using the World Political Cleavages and Inequality Database.

**Note:** the figure represents the difference between the share of top 10% income voters and the share of bottom 90% income voters voting for specific families of parties. Figures correspond to five-year averages over all countries available for a given time period (unbalanced panel of all 21 Western democracies). The estimates are presented after controlling for education, age, gender, religion, church attendance, rural/urban, region, race/ethnicity, employment status, and marital status (in country-years for which these variables are available).

**Figure A29 - Vote for left-wing parties by education group:  
decomposition by party family**

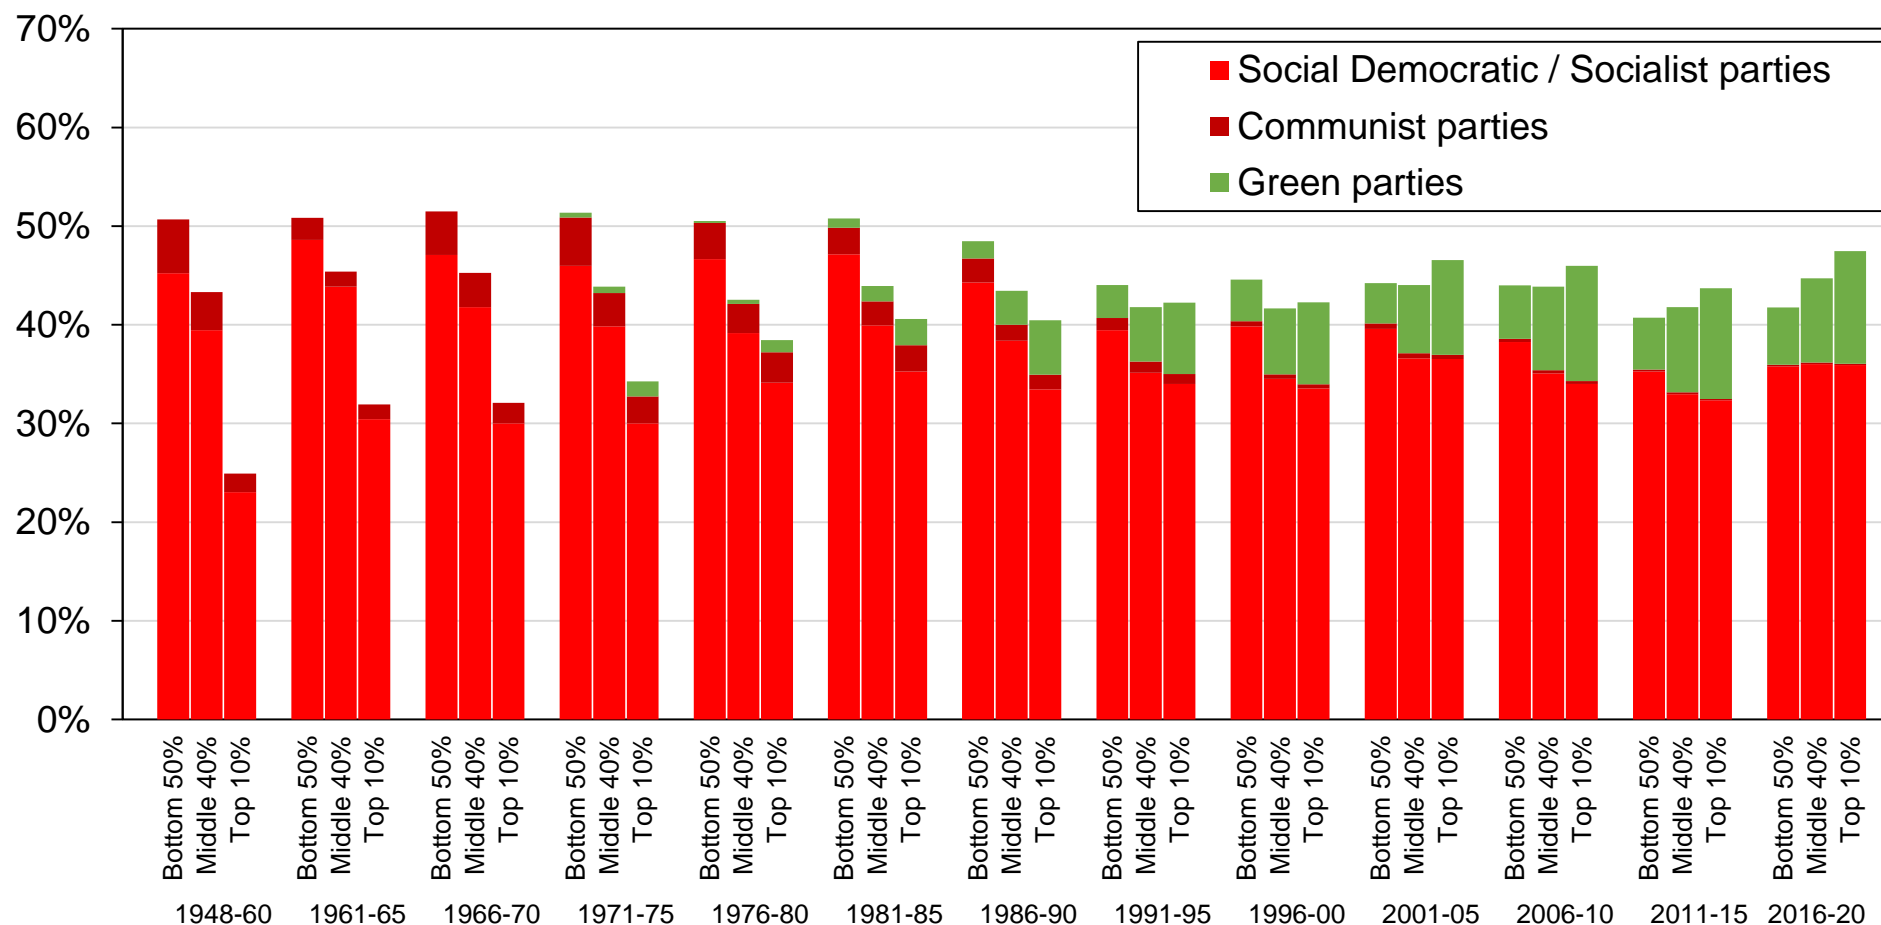

**Source:** authors' computations using the World Political Cleavages and Inequality Database.

**Note:** the figure shows the share of votes received by each family of parties by education group between 1955 and 2020. Average over all Western democracies.



**Figure A30 - Vote for right-wing parties by education group:  
decomposition by party family**

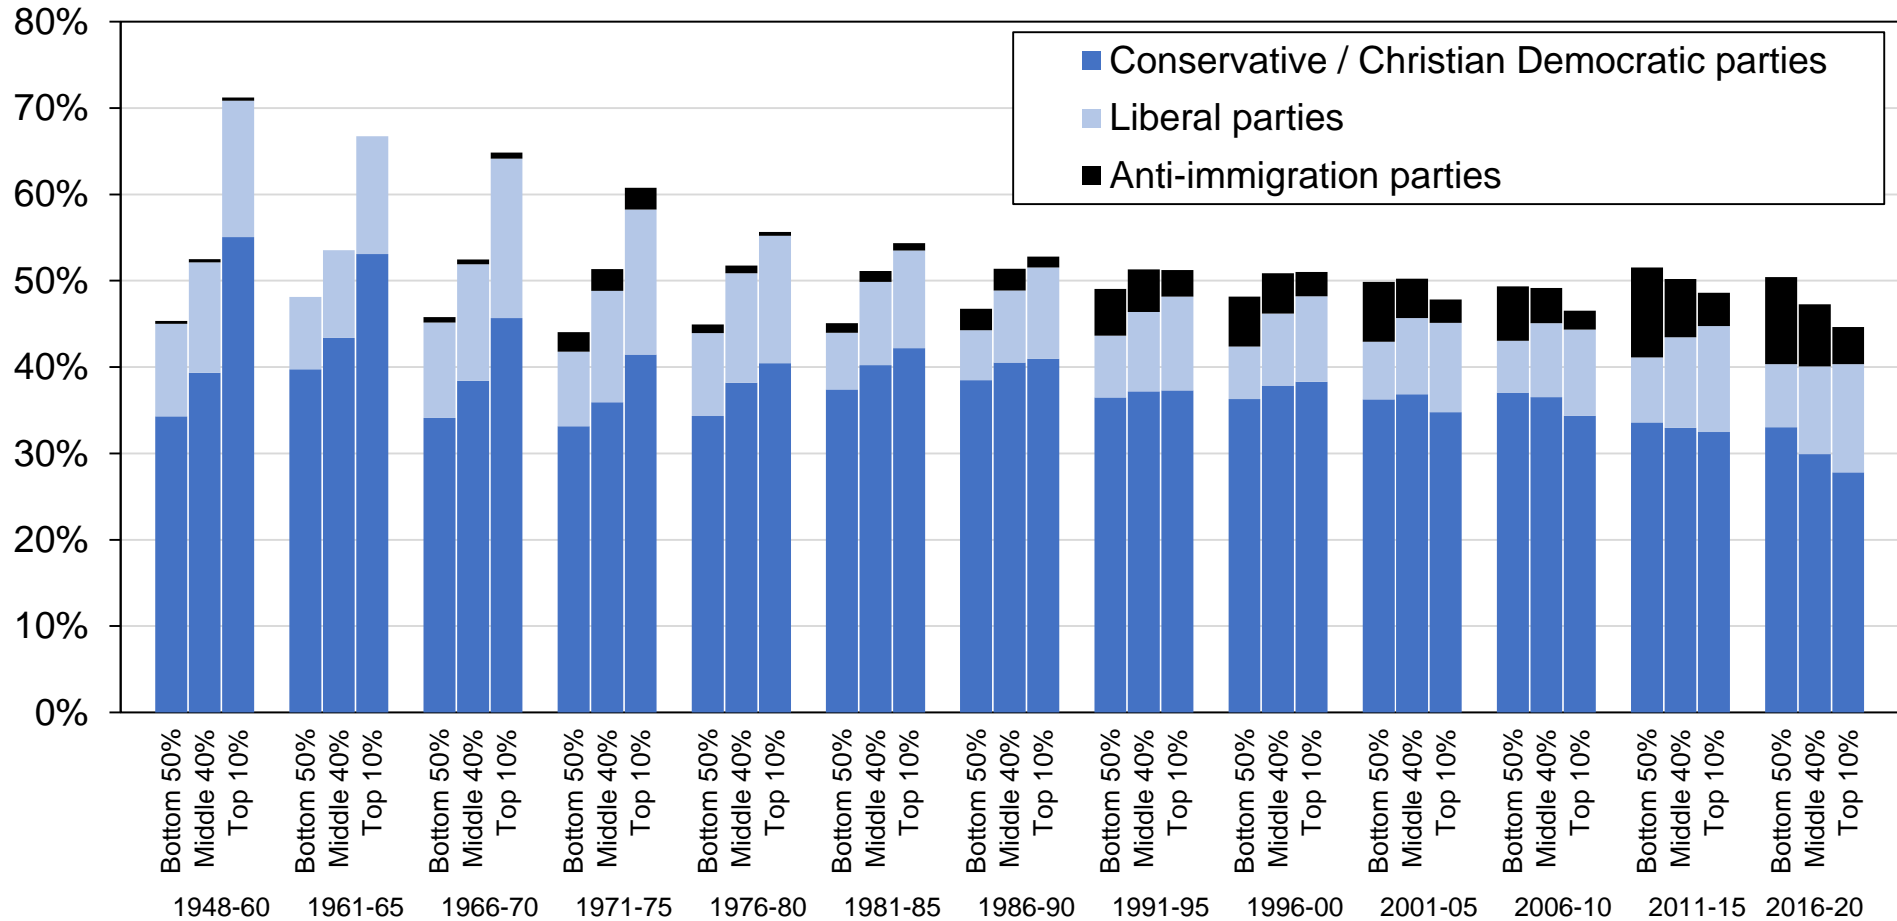

**Source:** authors' computations using the World Political Cleavages and Inequality Database.

**Note:** the figure shows the share of votes received by each family of parties by education group between 1955 and 2020. Average over all Western democracies.

**Figure A31 - Vote for left-wing parties by income group:  
decomposition by party family**

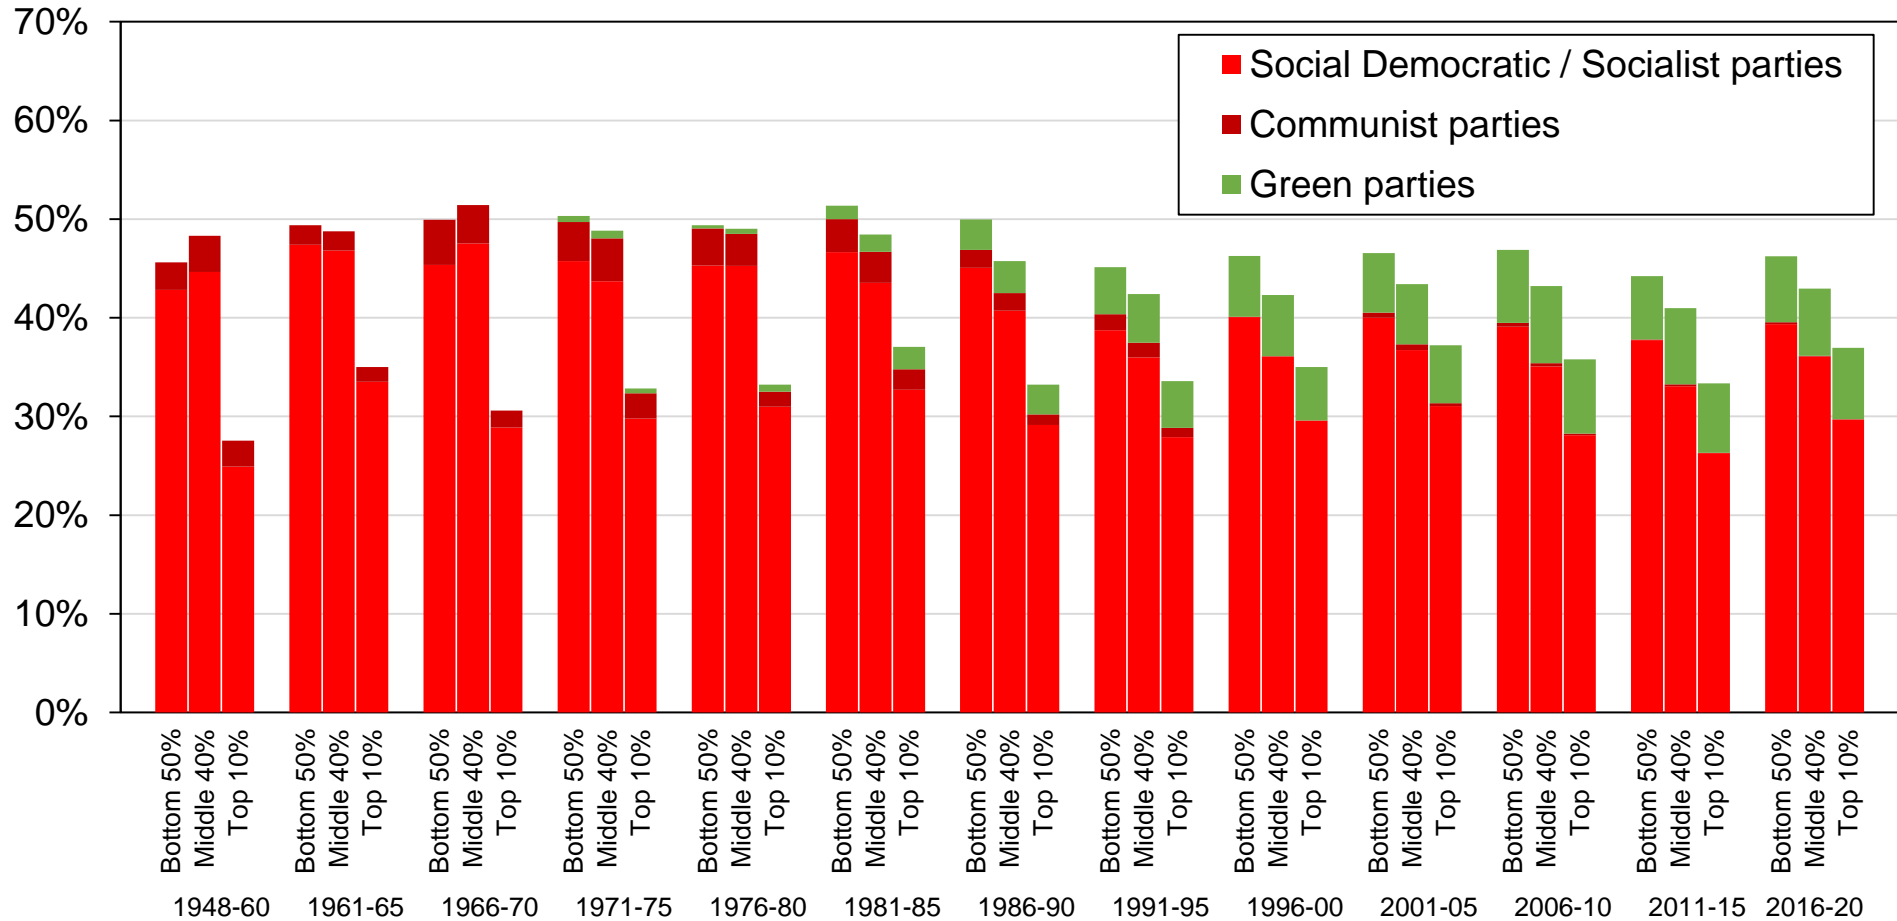

**Source:** authors' computations using the World Political Cleavages and Inequality Database.

**Note:** the figure shows the share of votes received by each family of parties by income group between 1955 and 2020. Average over all Western democracies.

**Figure A32 - Vote for right-wing parties by income group:  
decomposition by party family**

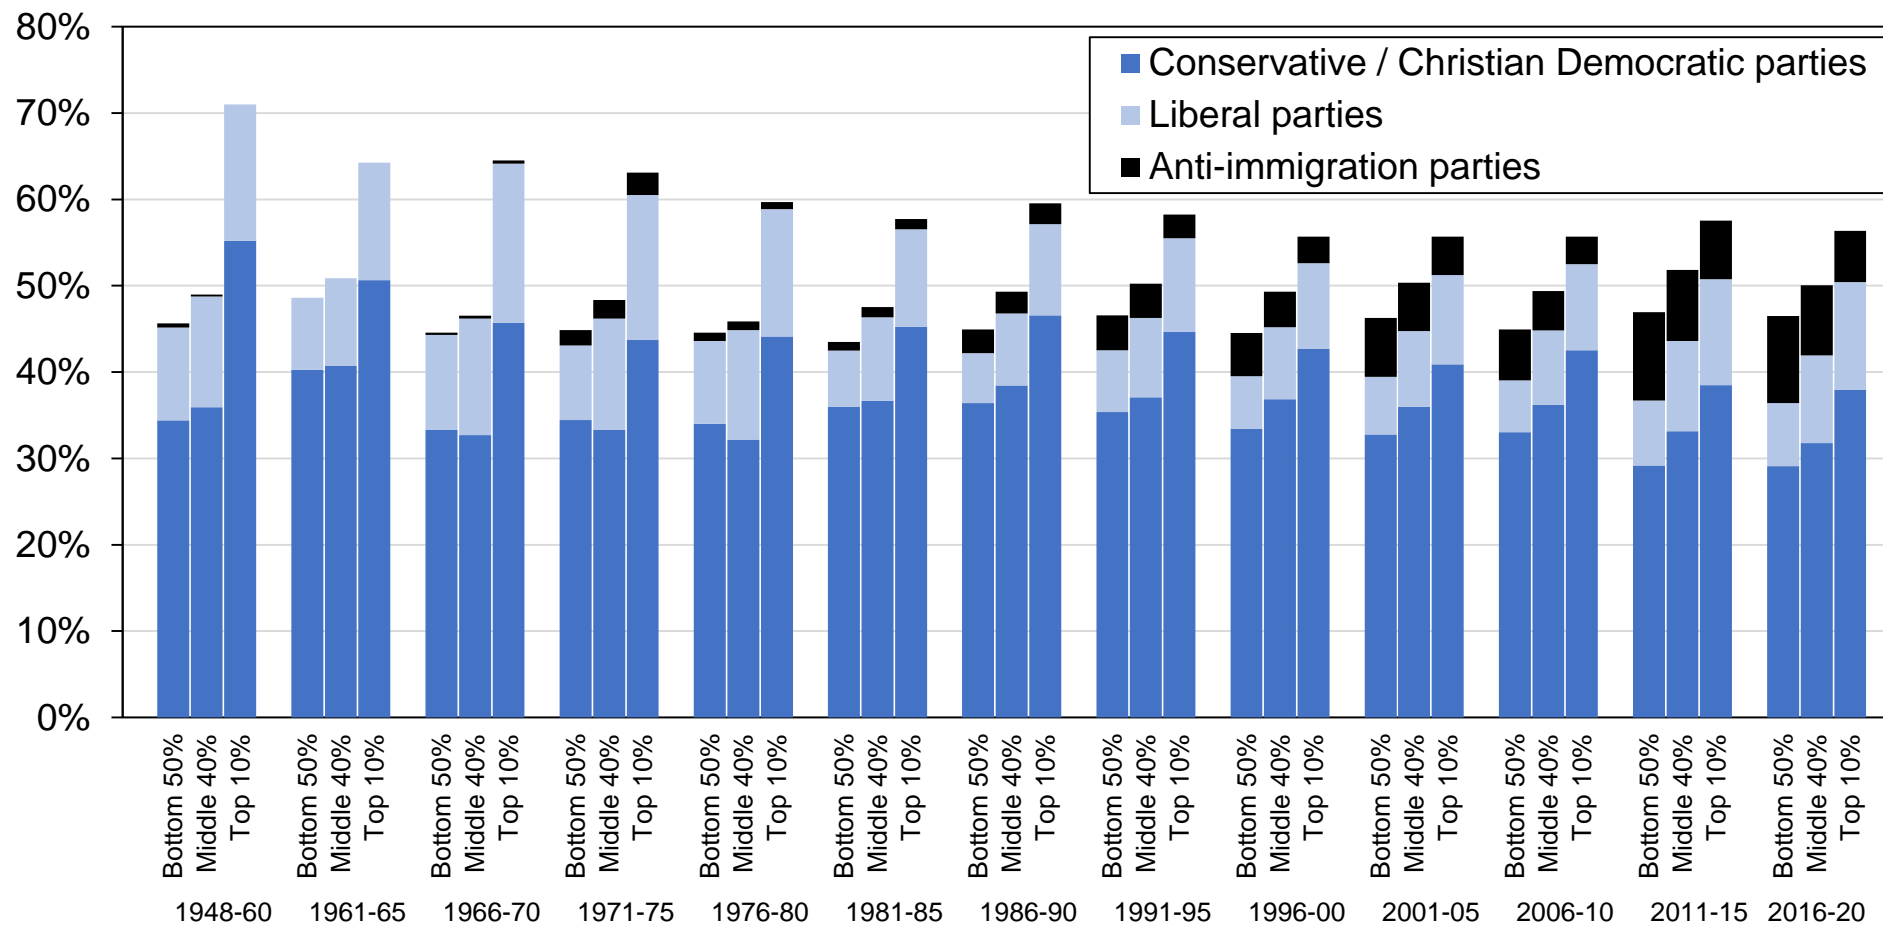

**Source:** authors' computations using the World Political Cleavages and Inequality Database.

**Note:** the figure shows the share of votes received by each family of parties by income group between 1955 and 2020. Average over all Western democracies.

**Figure A33 - Vote for Green parties by education group**

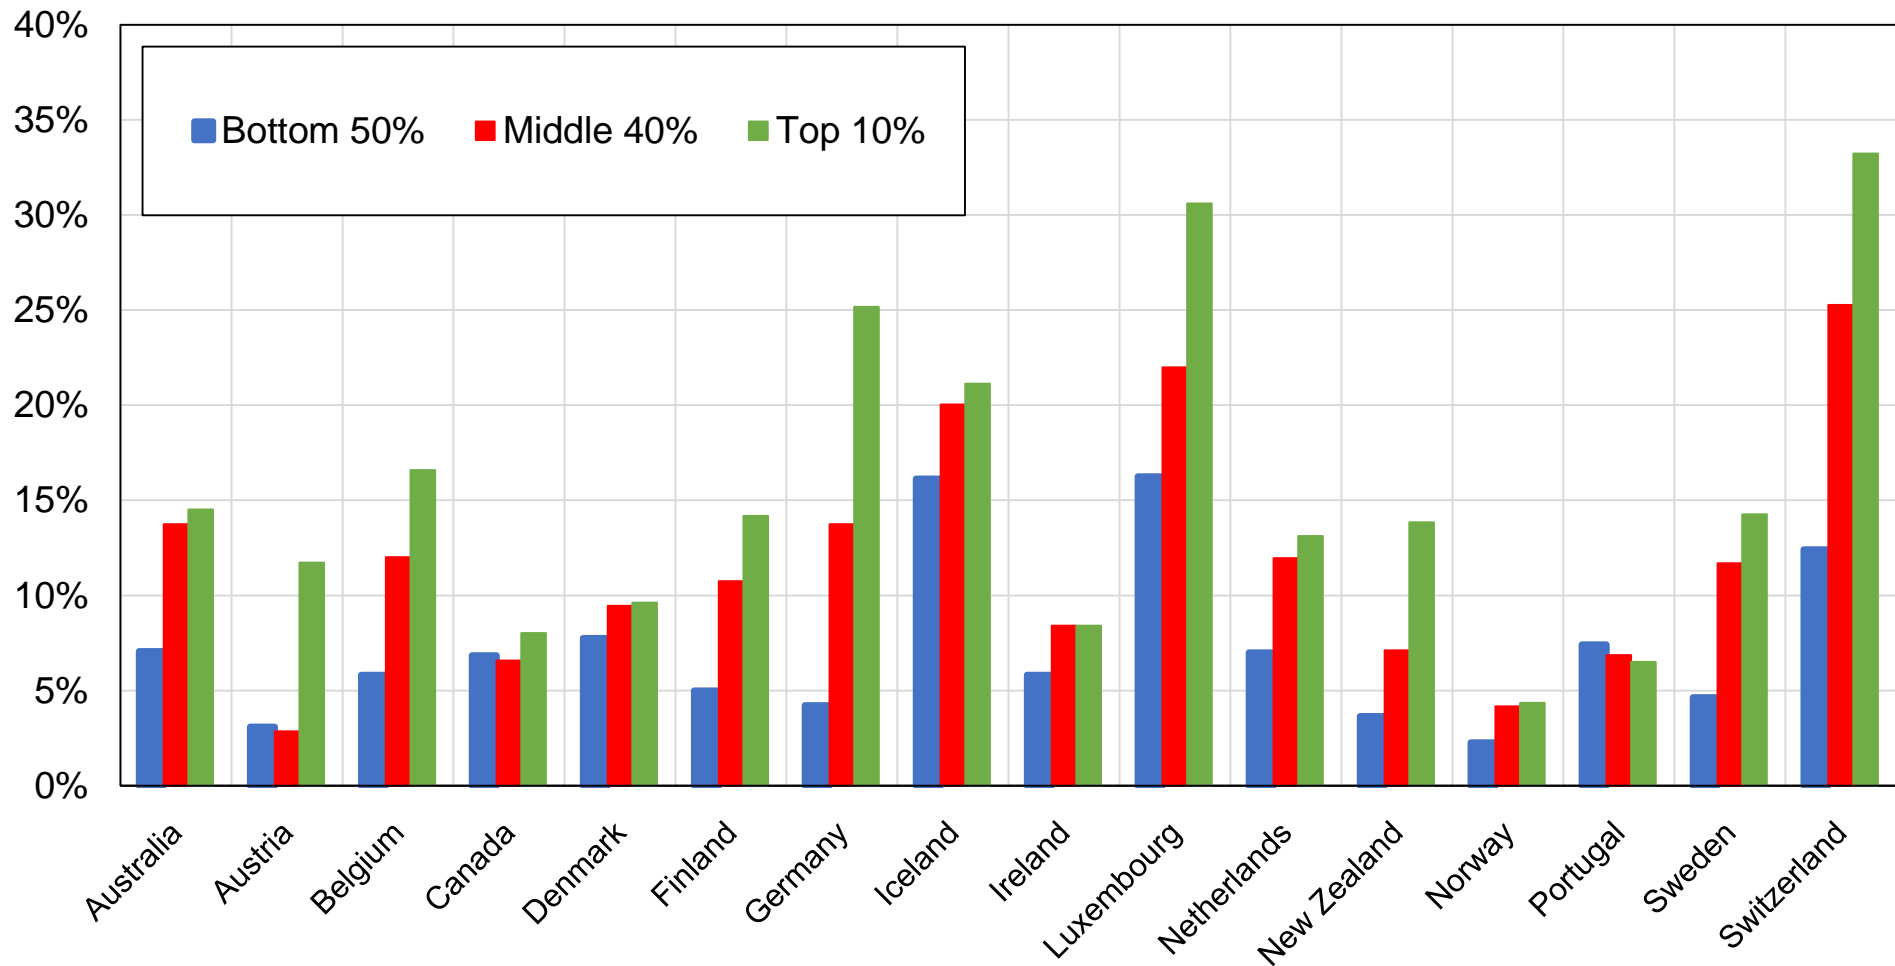

**Source:** authors' computations using the World Political Cleavages and Inequality Database.

**Note:** the figure shows the share of votes received by Green parties in Western democracies in the last election available by education group.

**Figure A34 - Vote for Green parties by income group**

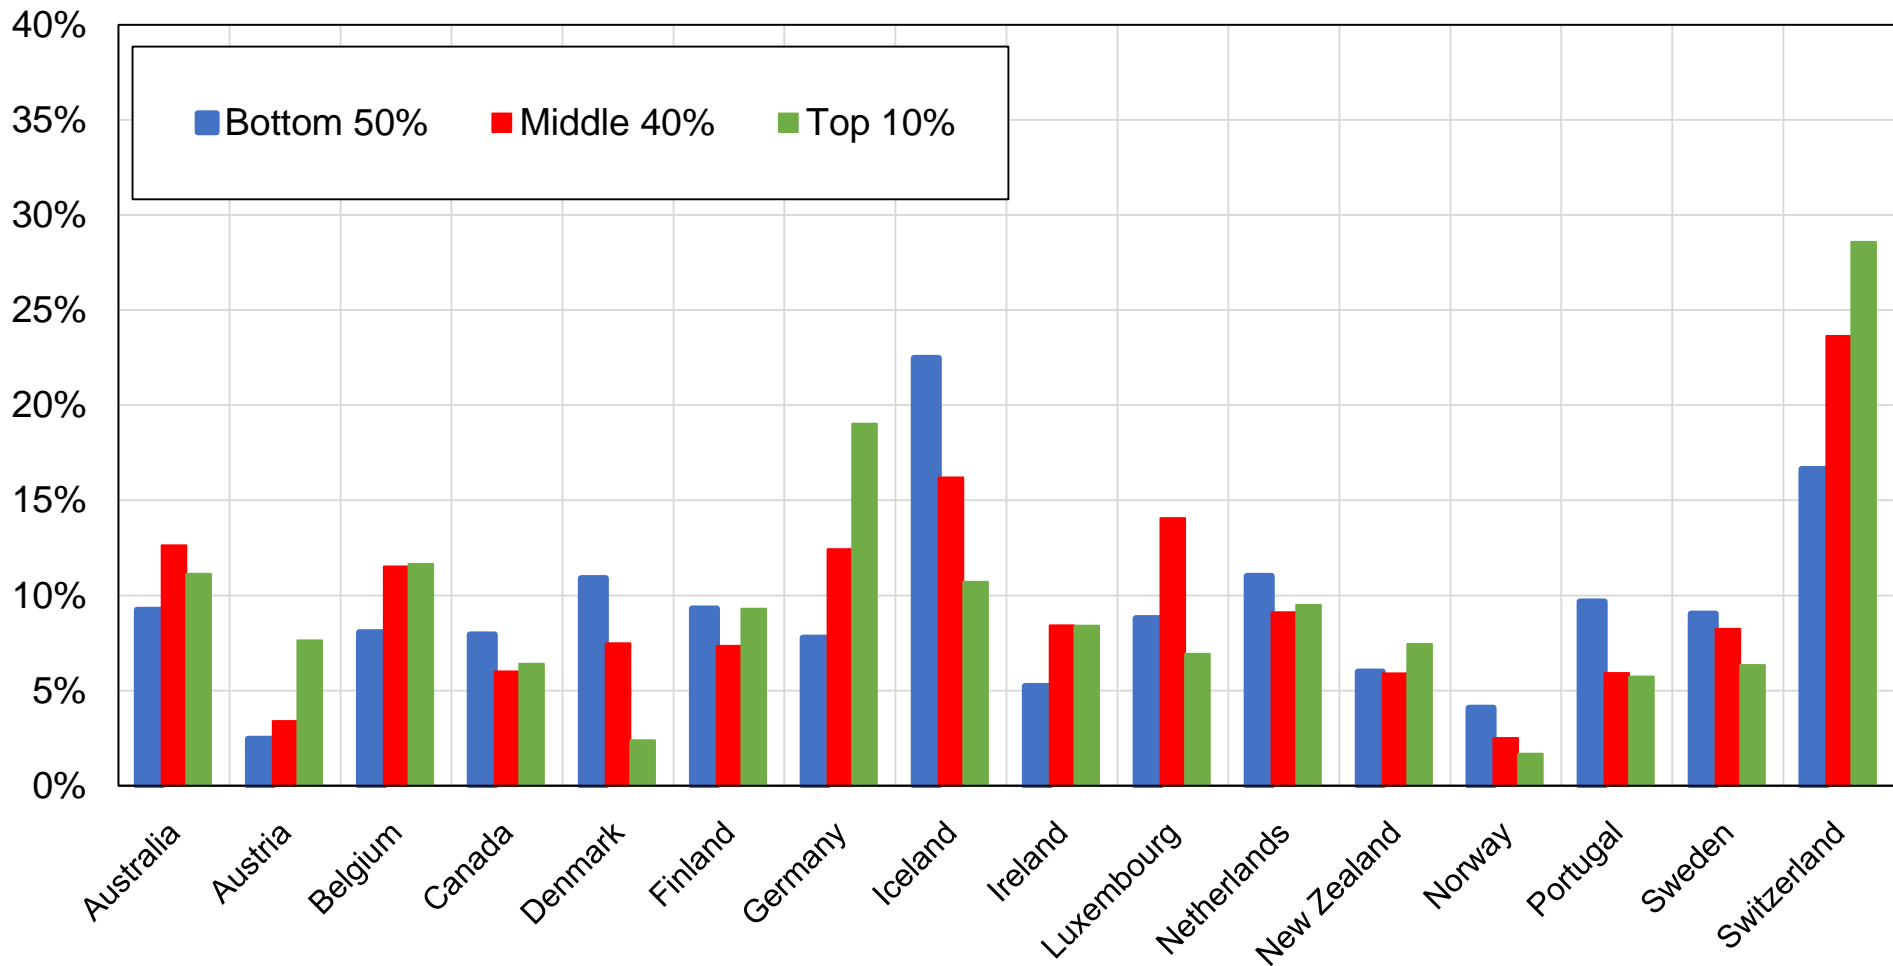

**Source:** authors' computations using the World Political Cleavages and Inequality Database.

**Note:** the figure shows the share of votes received by Green parties in Western democracies in the last election available by income group.

**Figure A35 - Vote for anti-immigration parties by education group**

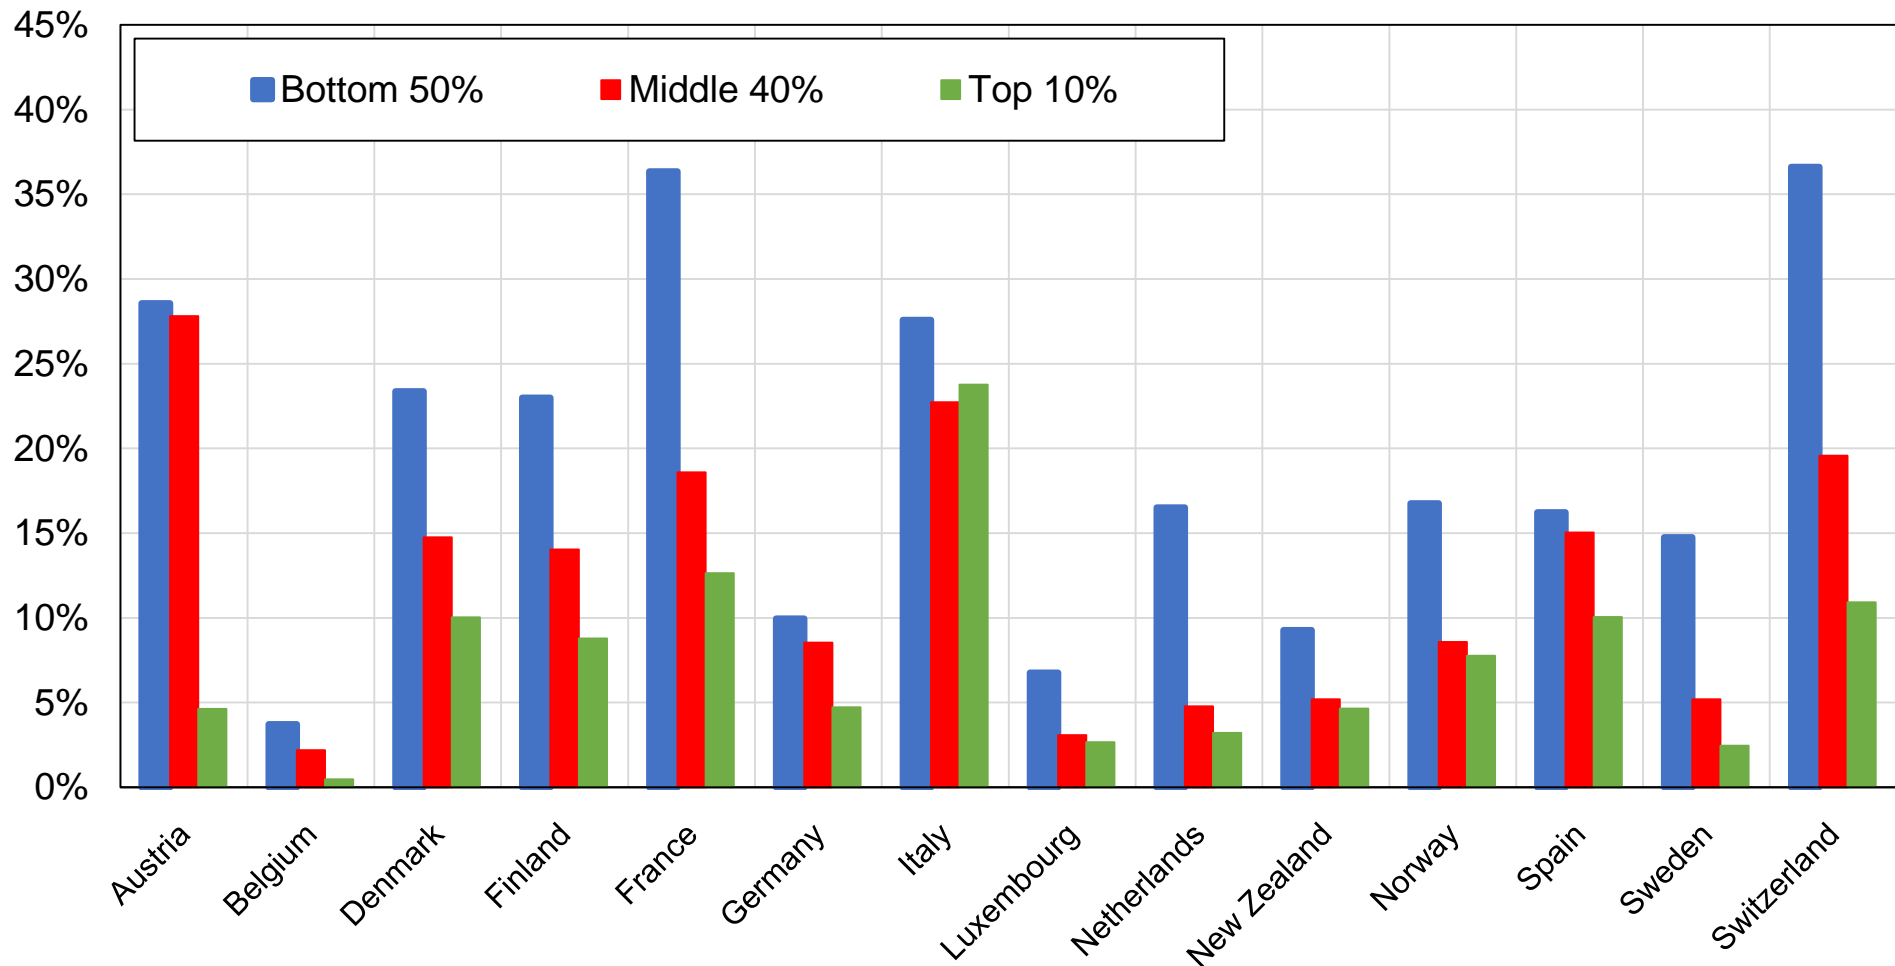

**Source:** authors' computations using the World Political Cleavages and Inequality Database.

**Note:** the figure shows the share of votes received by anti-immigration parties in Western democracies in the last election available by education group.

**Figure A36 - Vote for anti-immigration parties by income group**

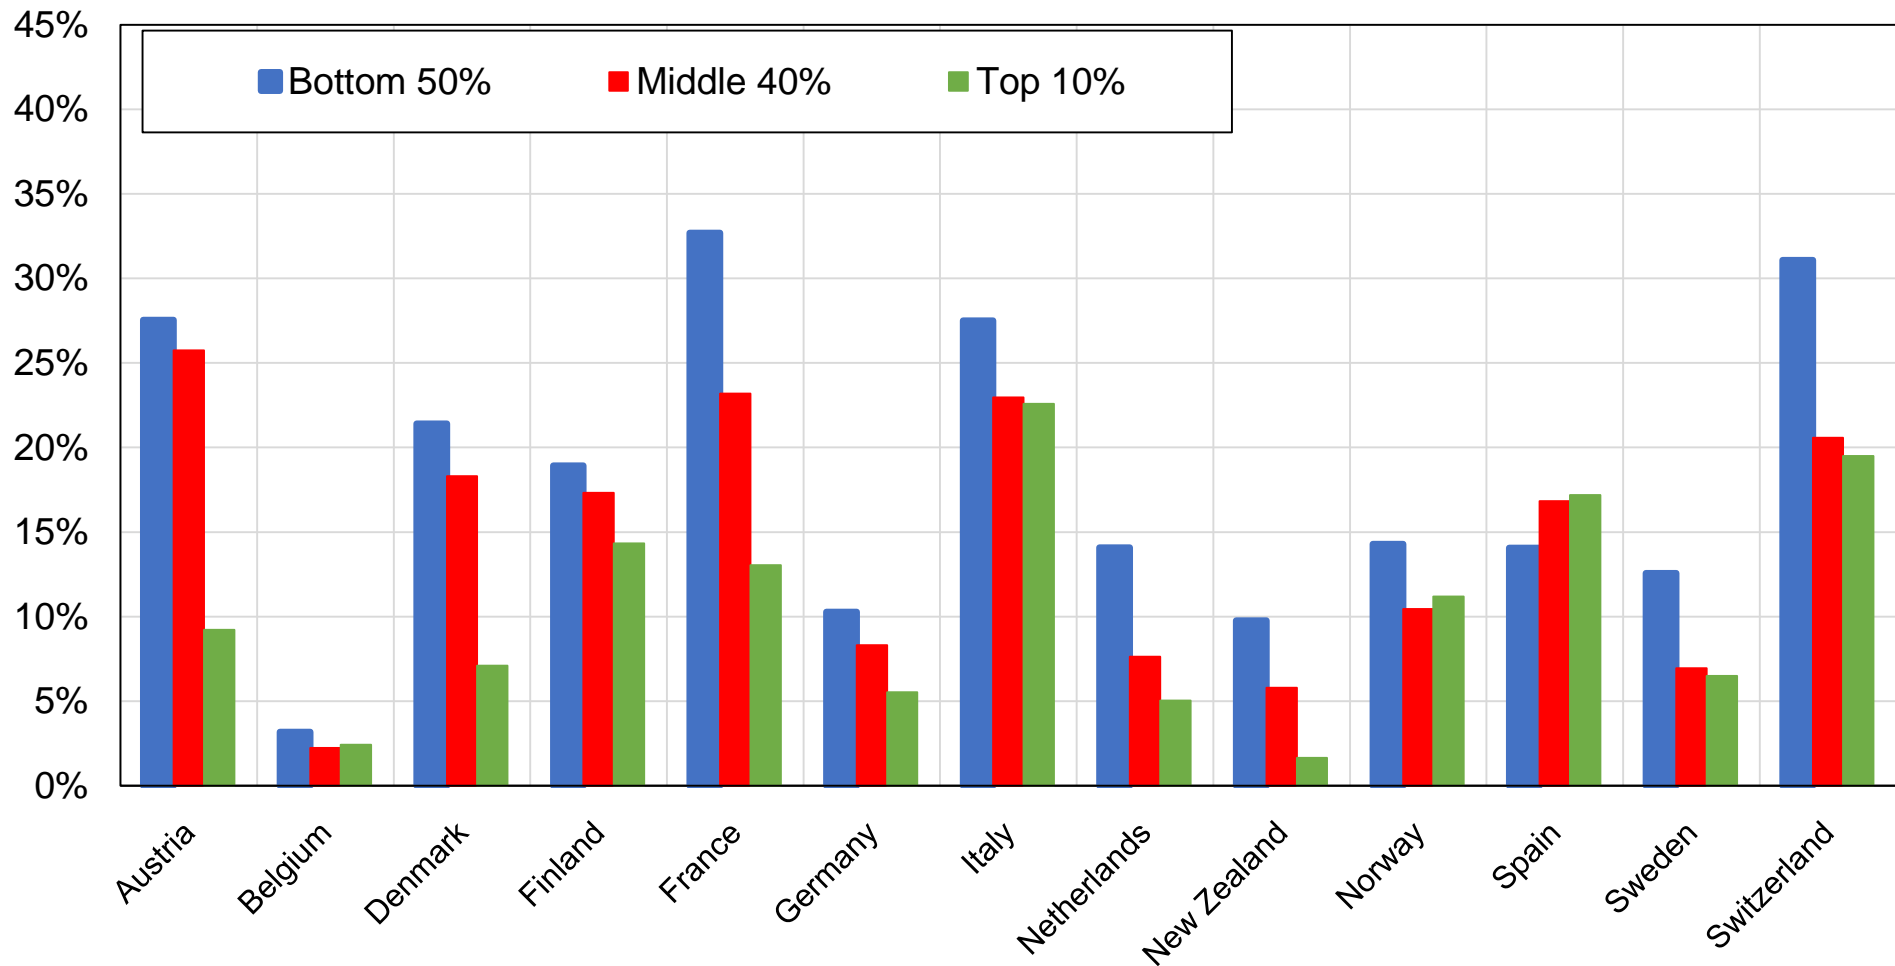

**Source:** authors' computations using the World Political Cleavages and Inequality Database.

**Note:** the figure shows the share of votes received by anti-immigration parties in Western democracies in the last election available by income group.

**Figure A37 - Composition of parties voted for by top 10% educated voters**

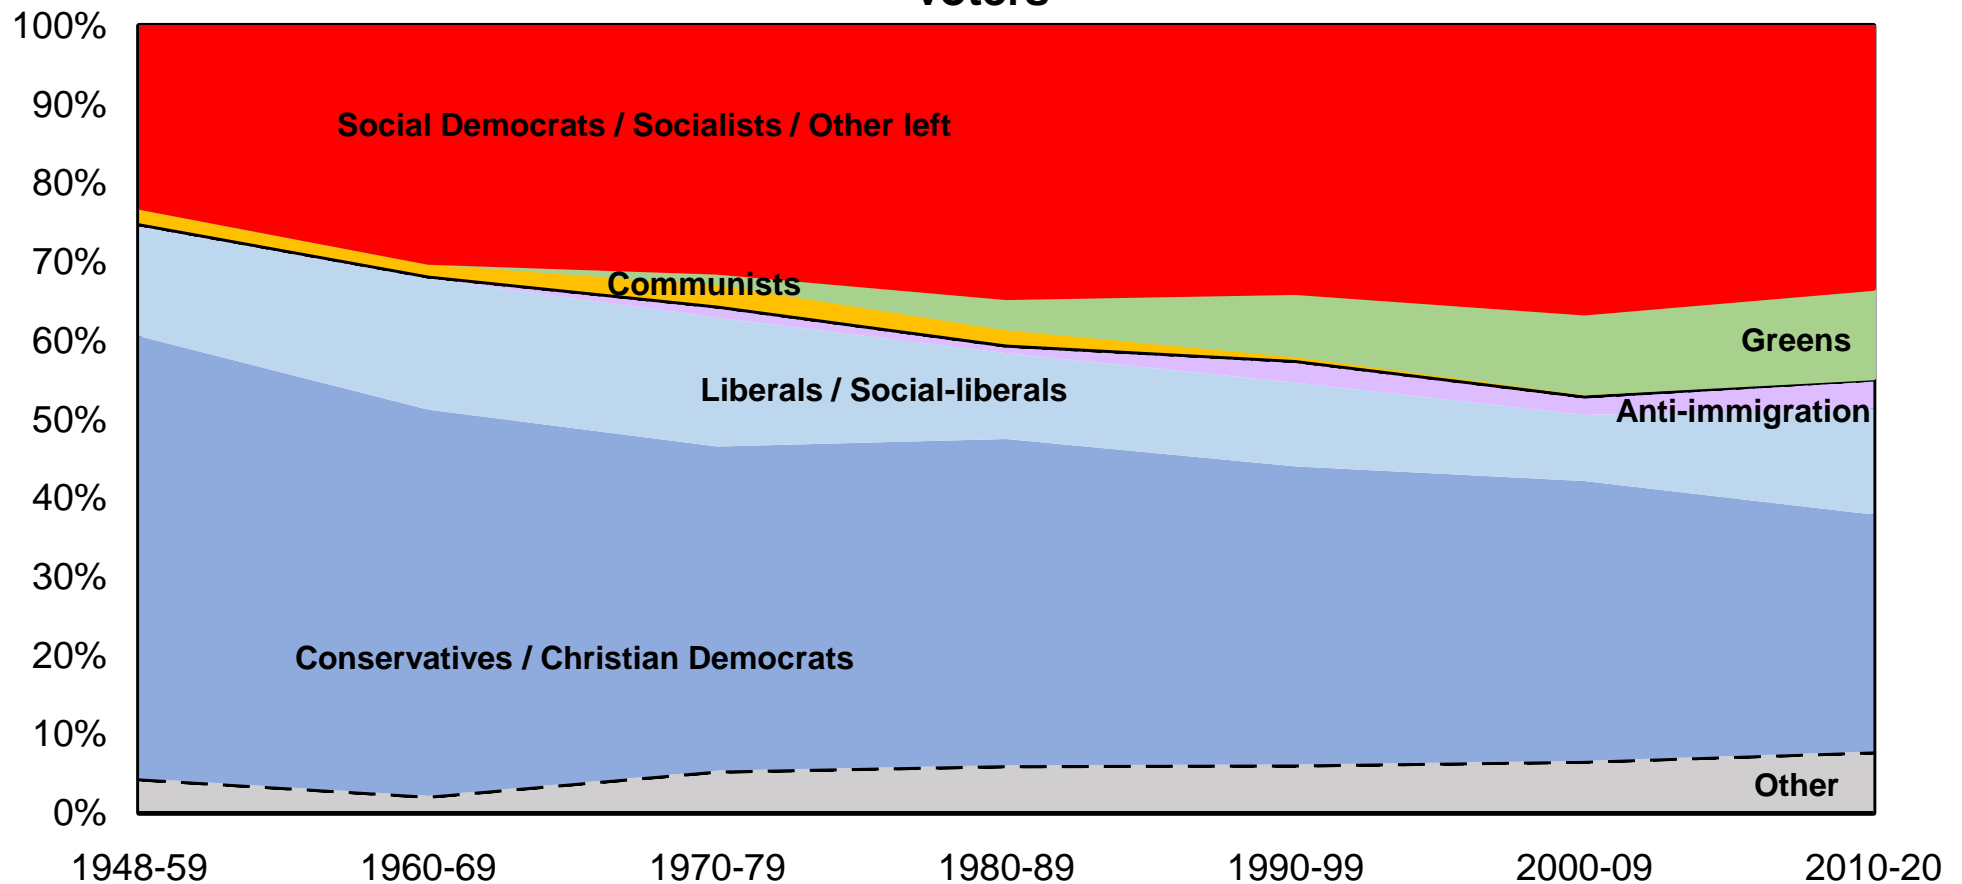

**Source:** authors' computations using electoral surveys.

**Note:** the figure represents the average share of votes received by selected families of political parties in Western democracies between the 1940s and the 2010s within the top 10% group of highest educated voters. Decennial averages over all Western democracies. The dashed lines delimit the categorization of parties considered in the main specification (social democrats and affiliated, conservatives and affiliated, and other parties).



**Figure A38 - Composition of parties voted for by top 10% income voters**

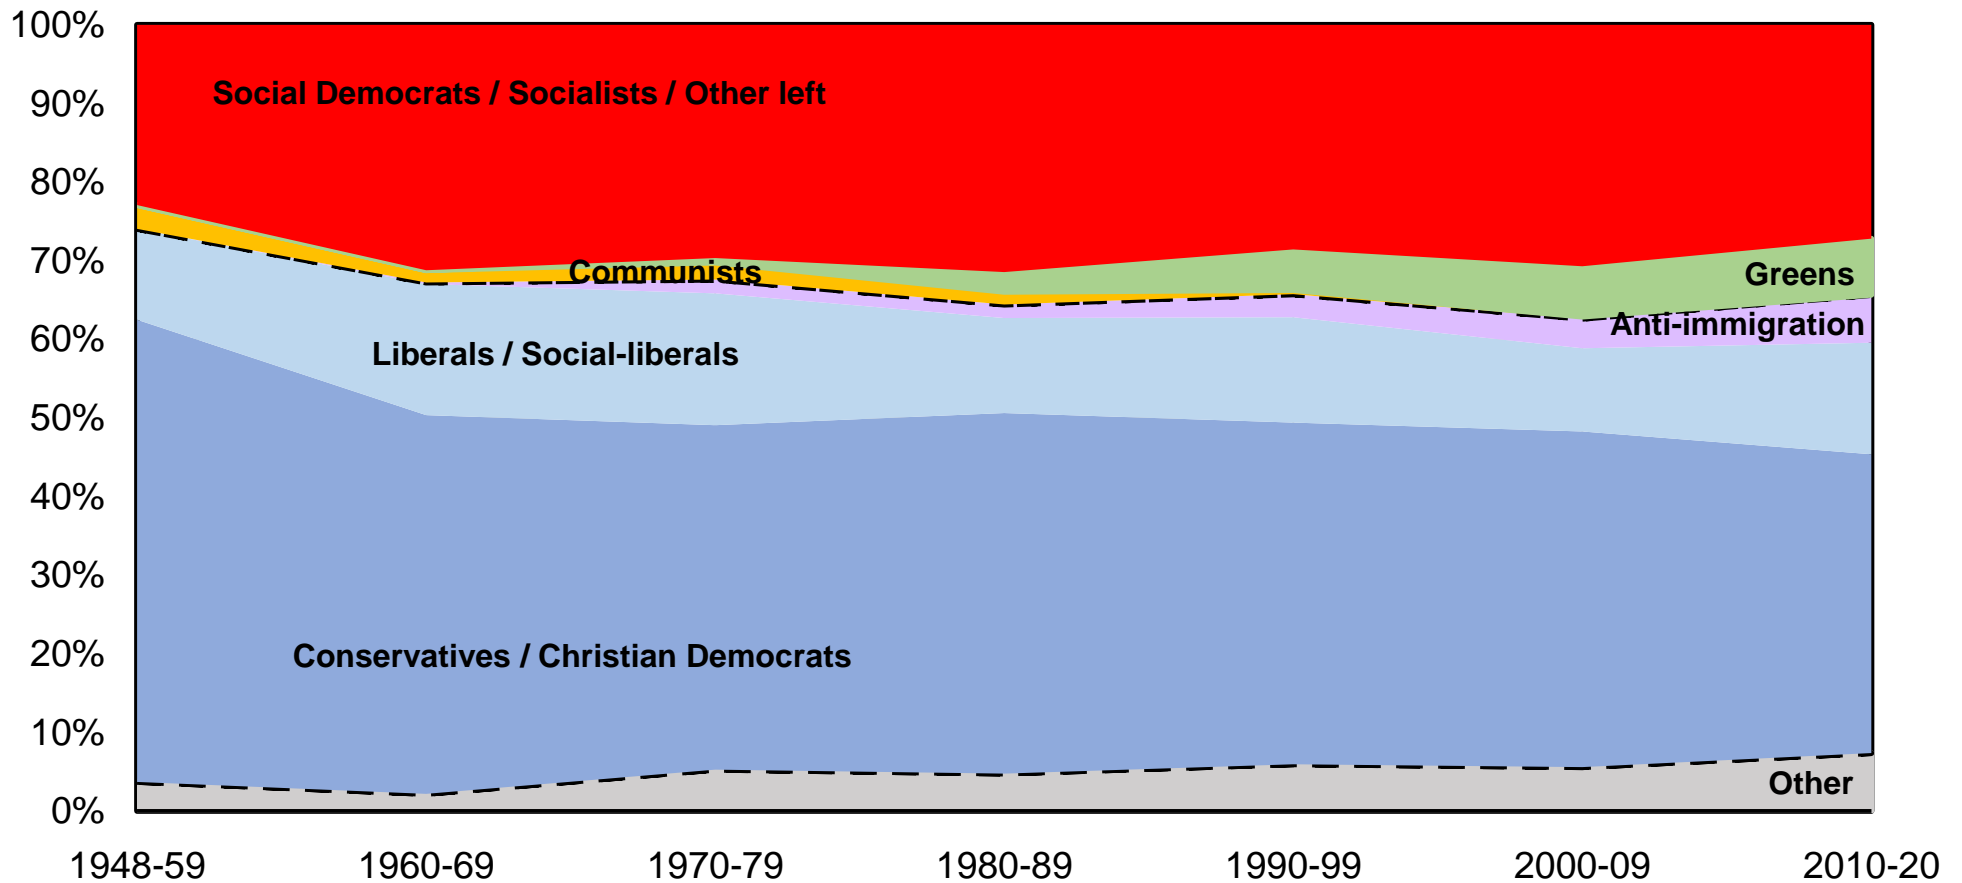

**Source:** authors' computations using electoral surveys.

**Note:** the figure represents the average share of votes received by selected families of political parties in Western democracies between the 1940s and the 2010s within the top 10% group of highest income voters. Decennial averages over all Western democracies. The dashed lines delimit the categorization of parties considered in the main specification (social democrats and affiliated, conservatives and affiliated, and other parties).

**Figure A39 - The fragmentation of political cleavage structures.  
Panel A. 1960s-1980s**

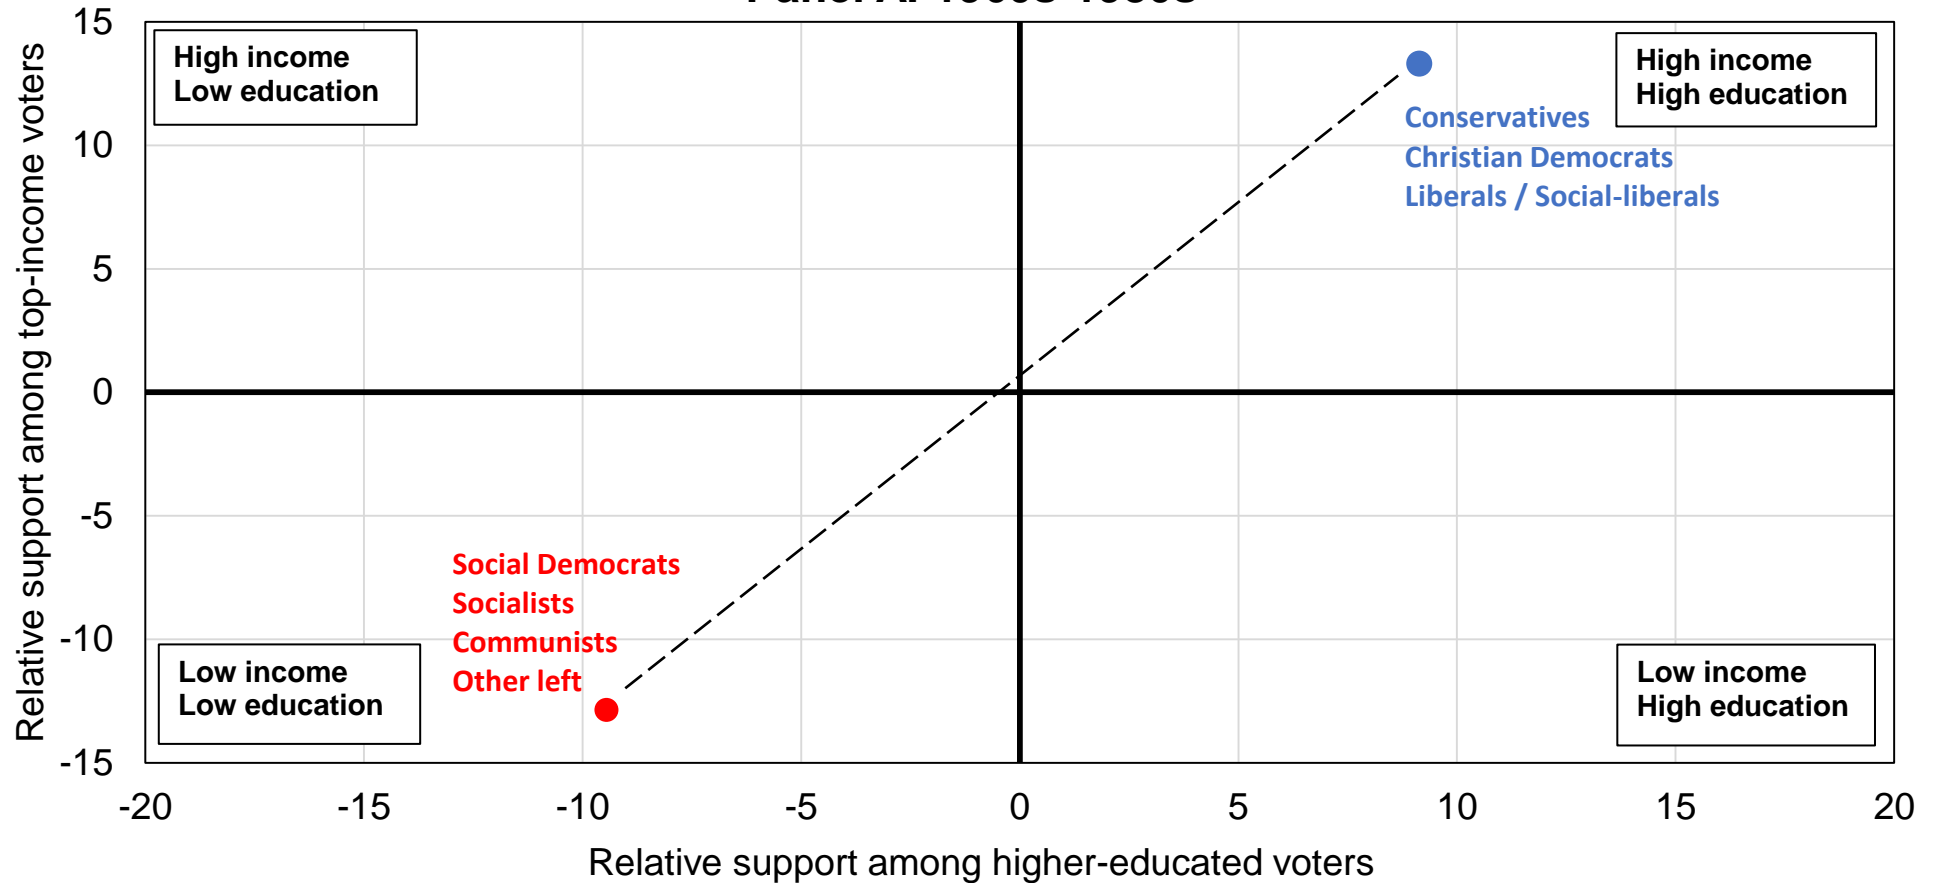

**Source:** authors' computations using the World Political Cleavages and Inequality Database.

**Note:** the figure represents the difference between the share of high-income (top 10%) and low-income (bottom 90%) voters voting for selected groups of parties on the y-axis, and the same difference between higher-educated (top 10%) and lower-educated (bottom 90%) voters on the x-axis. In the 1960s, social democratic, socialist, and communist parties were supported by both low-income and lower-educated voters, while conservative, Christian, and liberal parties were supported by both high-income and higher-educated voters. Averages over all Western democracies. Estimates control for income/education, age, gender, religion, church attendance, rural/urban, region, race/ethnicity, employment status, and marital status (in country-years for which these variables are available).

**Figure A40 - The fragmentation of political cleavage structures.  
Panel B. 2000-2020**

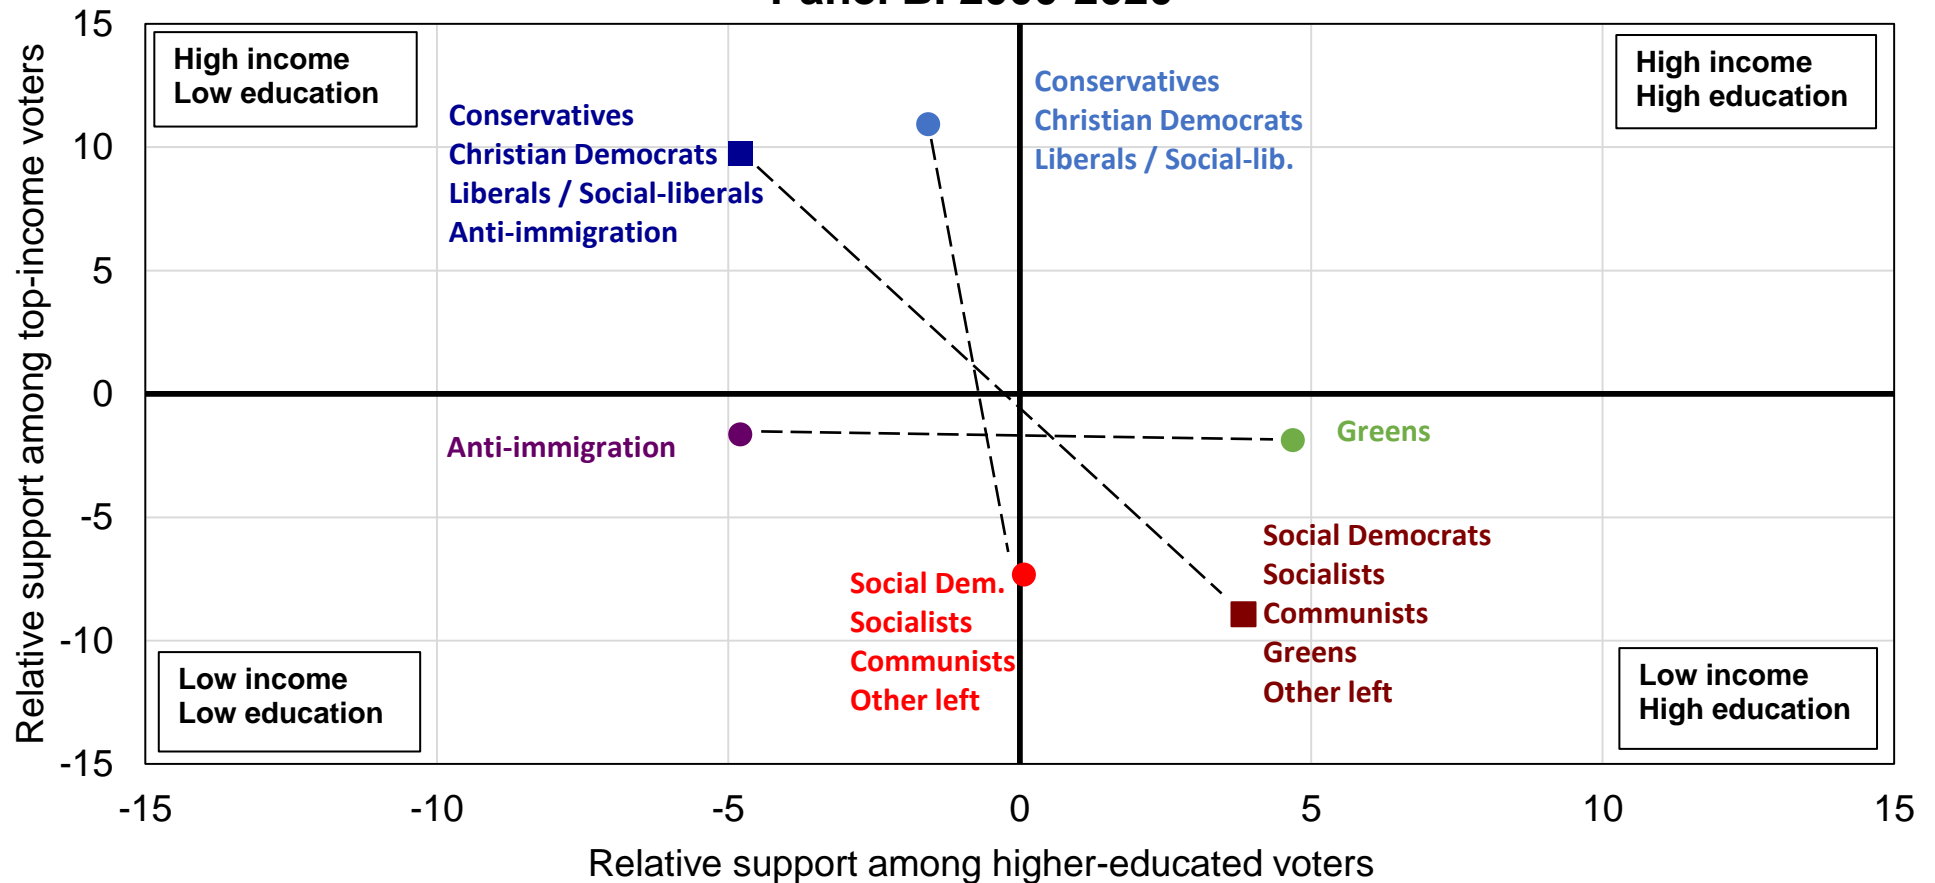

**Source:** authors' computations using the World Political Cleavages and Inequality Database.

**Note:** the figure represents the difference between the share of high-income (top 10%) and low-income (bottom 90%) voters voting for selected groups of parties on the y-axis, and the same difference between higher-educated (top 10%) and lower-educated (bottom 90%) voters on the x-axis. In 2000-2020, education most clearly distinguishes anti-immigration from green parties, while income most clearly distinguishes conservative and Christian parties from social democratic, socialist, and communist parties. Averages over all Western democracies. Estimates control for income/education, age, gender, religion, church attendance, rural/urban, region, race/ethnicity, employment status, and marital status (in country-years for which these variables are available).

**Figure A41 - Educational and income divides: Detailed party families**

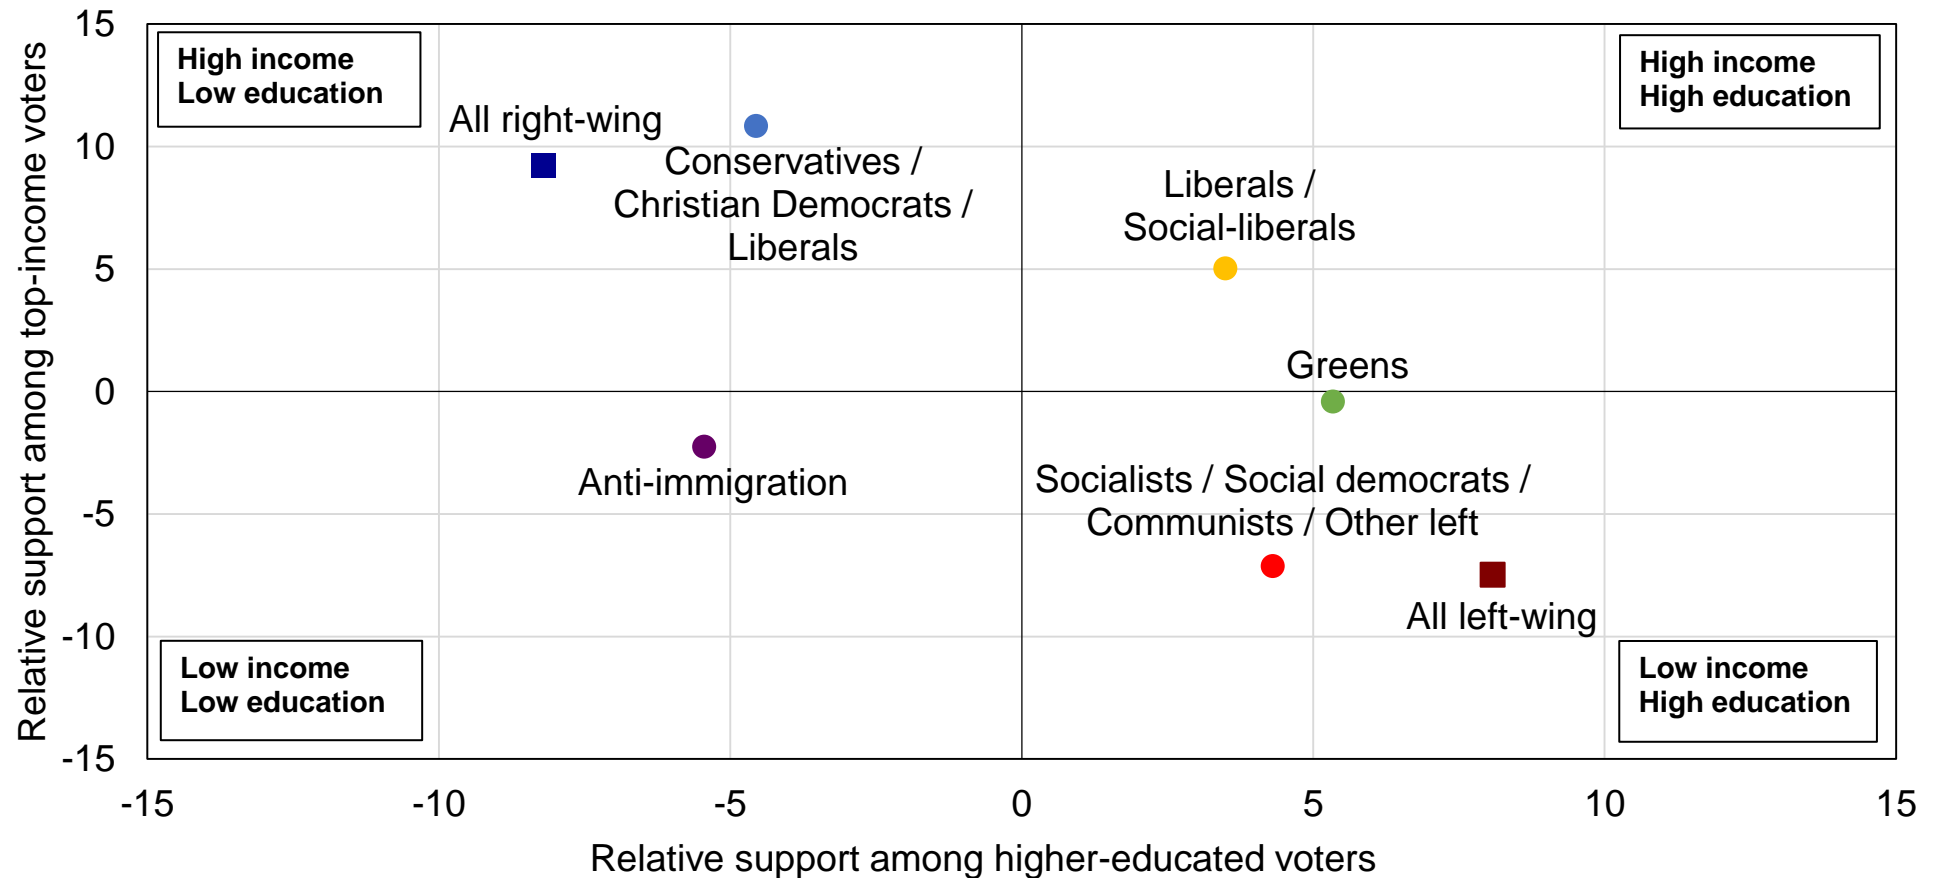

Source: authors' computations using the World Political Cleavages and Inequality Database.

Note: the figure represents the difference between the share of high-income (top 10%) and low-income (bottom 90%) voters voting for selected groups of parties on the y-axis, and the same difference between higher-educated (top 10%) and lower-educated (bottom 90%) voters on the x-axis. Education most clearly distinguishes anti-immigration from green parties, while income distinguishes most clearly conservative and Christian parties from socialist, social democratic and communist parties. Averages over all Western democracies over the 2000-2020 period. Estimates control for income/education, age, gender, religion, church attendance, rural/urban, region, race/ethnicity, employment status, and marital status (in country-years for which these variables are available).

**Figure A42 - The disconnection of income and education cleavages in Western democracies (quadrant representation), all countries**

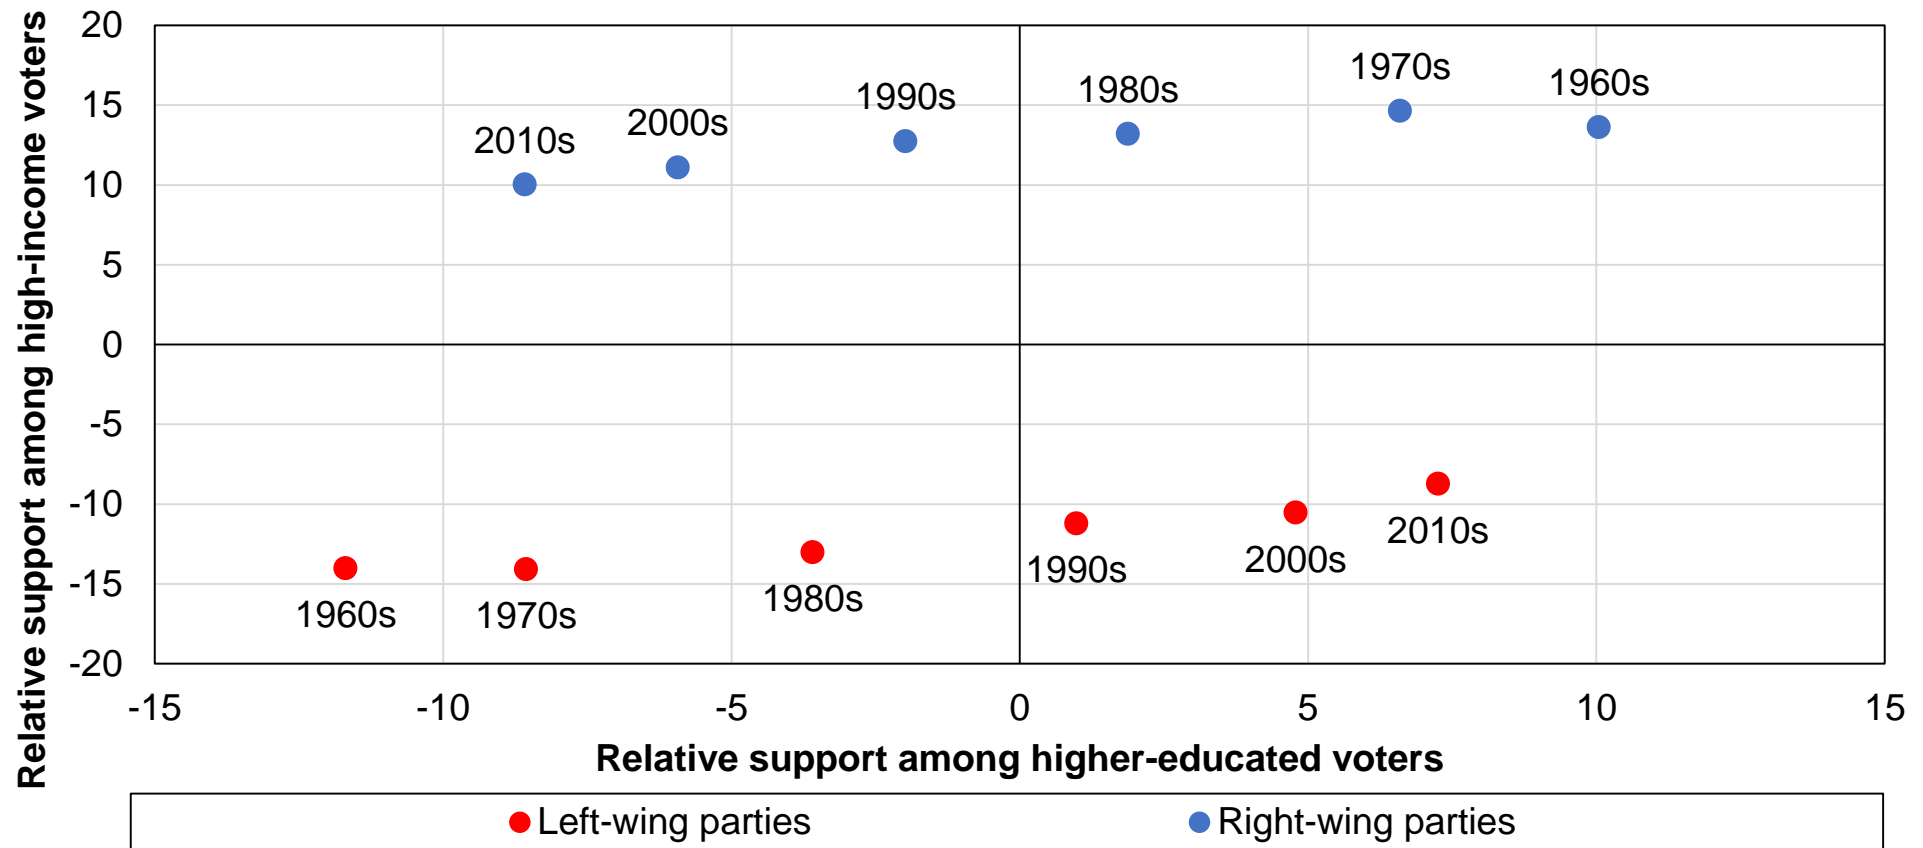

**Source:** authors' computations using the World Political Cleavages and Inequality Database.

**Note:** the figure represents the difference between the share of high-income (top 10%) and low-income (bottom 90%) voters voting for selected groups of parties on the y-axis, and the same difference between higher-educated (top 10%) and lower-educated (bottom 90%) voters on the x-axis. Estimates control for income/education, age, gender, religion, church attendance, rural/urban, region, race/ethnicity, employment status, and marital status (in country-years for which these variables are available). Figures correspond to ten-year averages for Australia, Britain, Canada, Denmark, France, Germany, Italy, the Netherlands, Norway, Sweden, Switzerland, and the US.

**Figure A43 - Income and educational divides in Western democracies, 1950s**

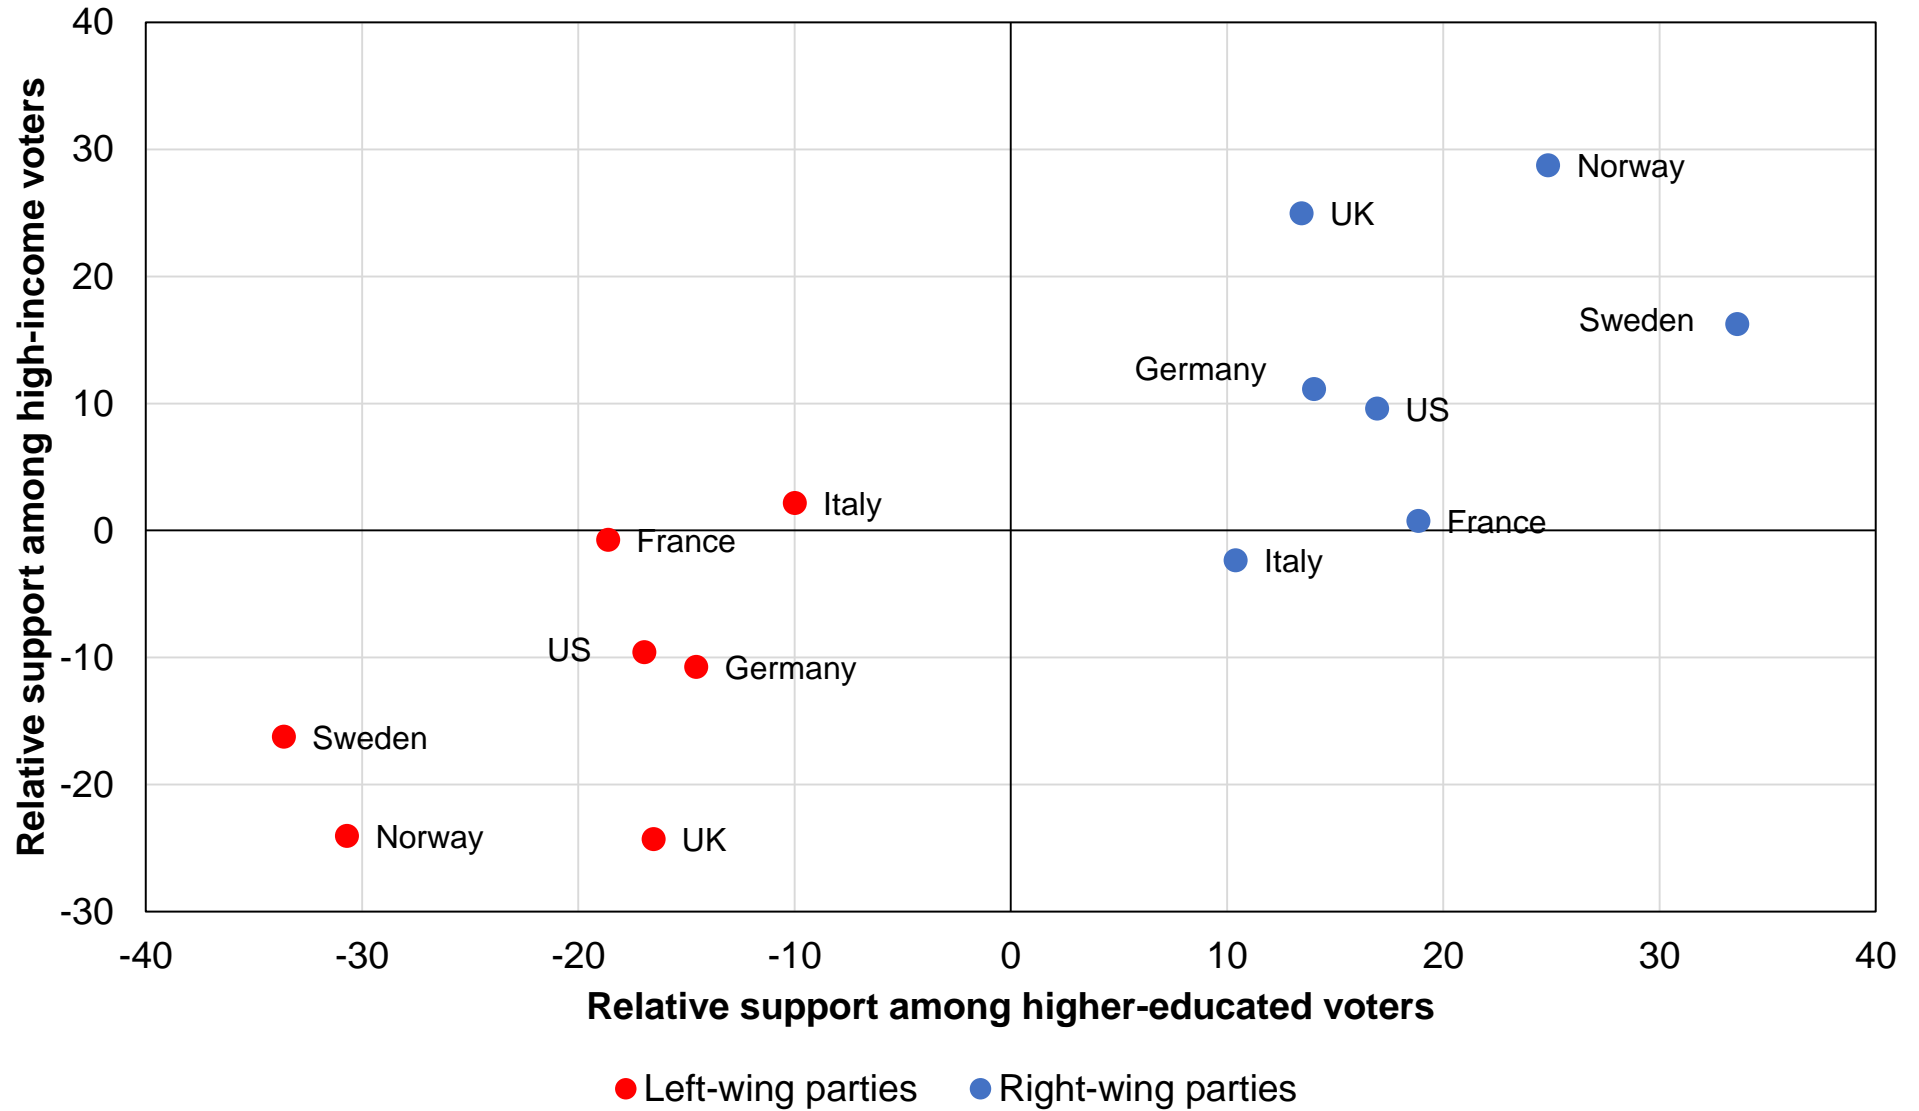

**Figure A44 - Income and educational divides in Western democracies, 1960s**

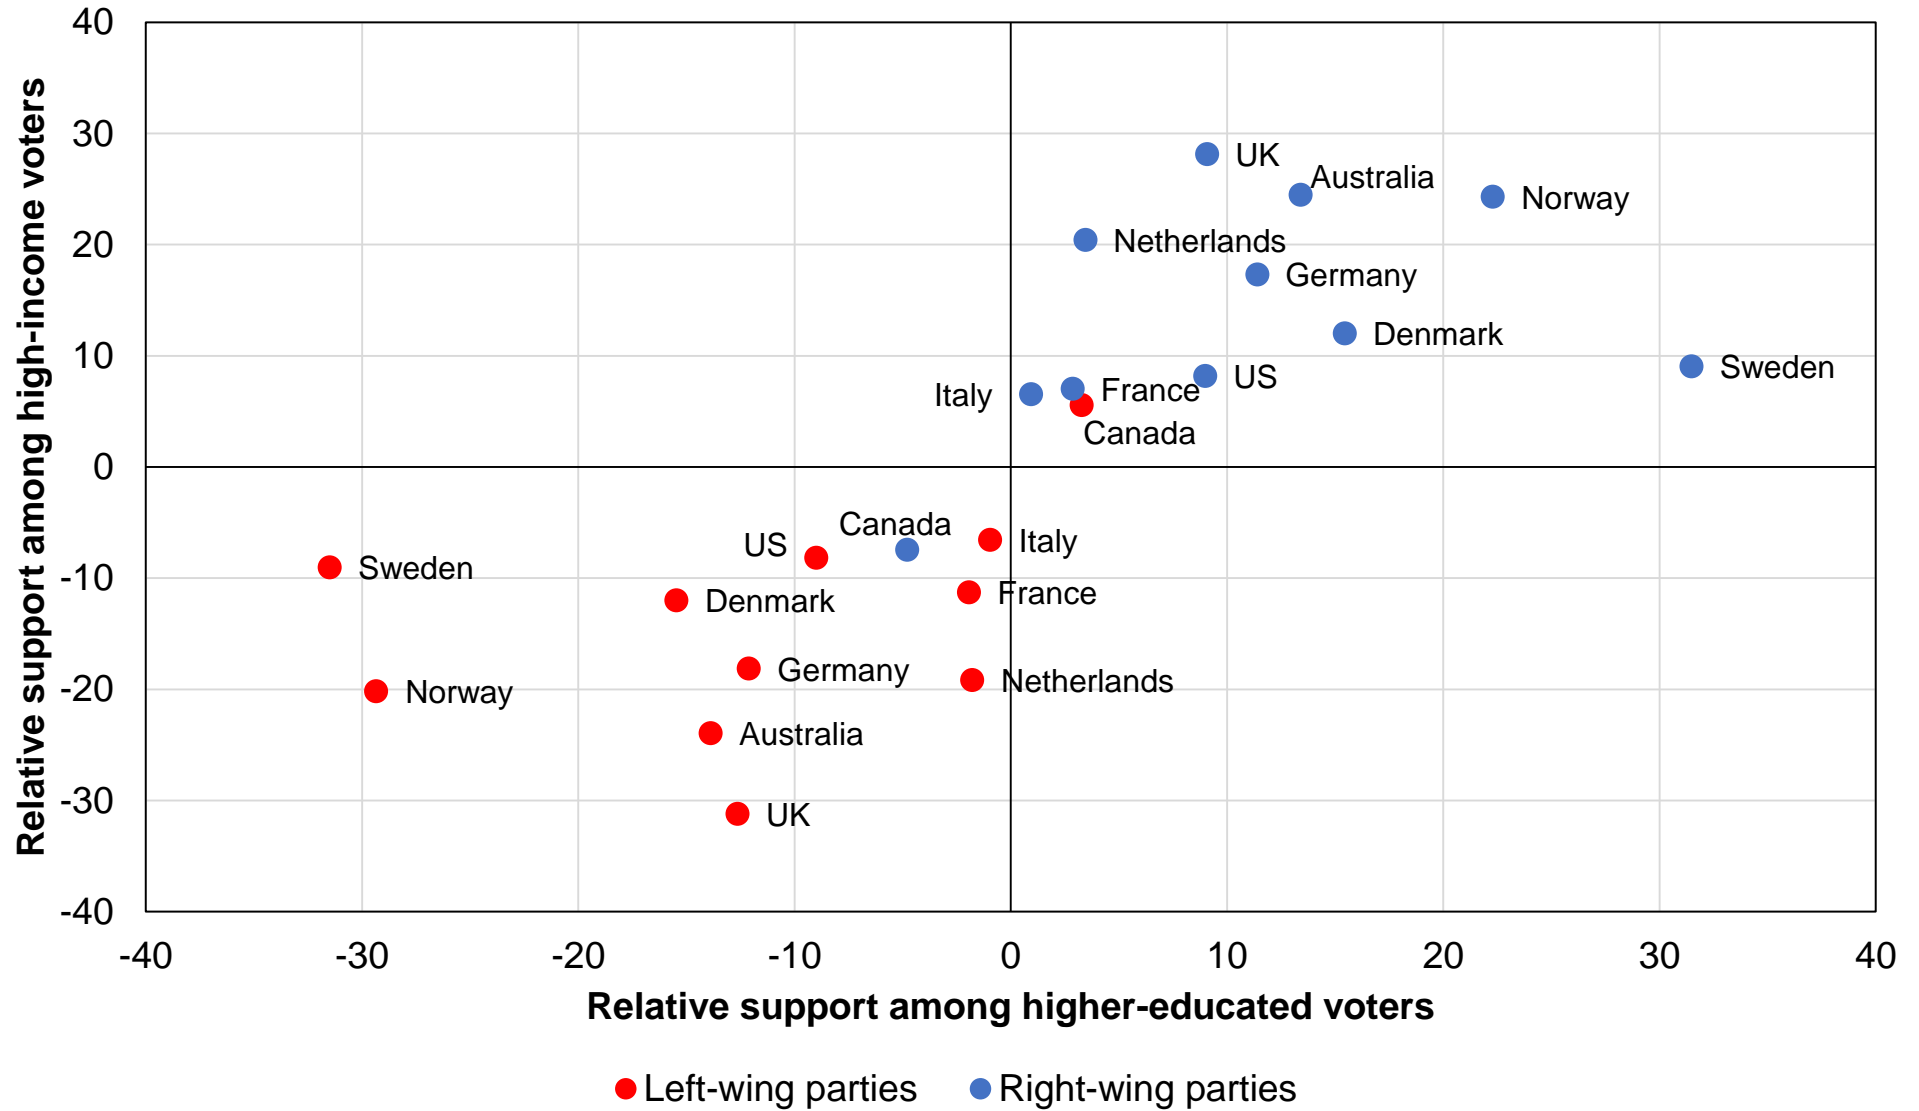

**Figure A45 - Income and educational divides in Western democracies, 1970s**

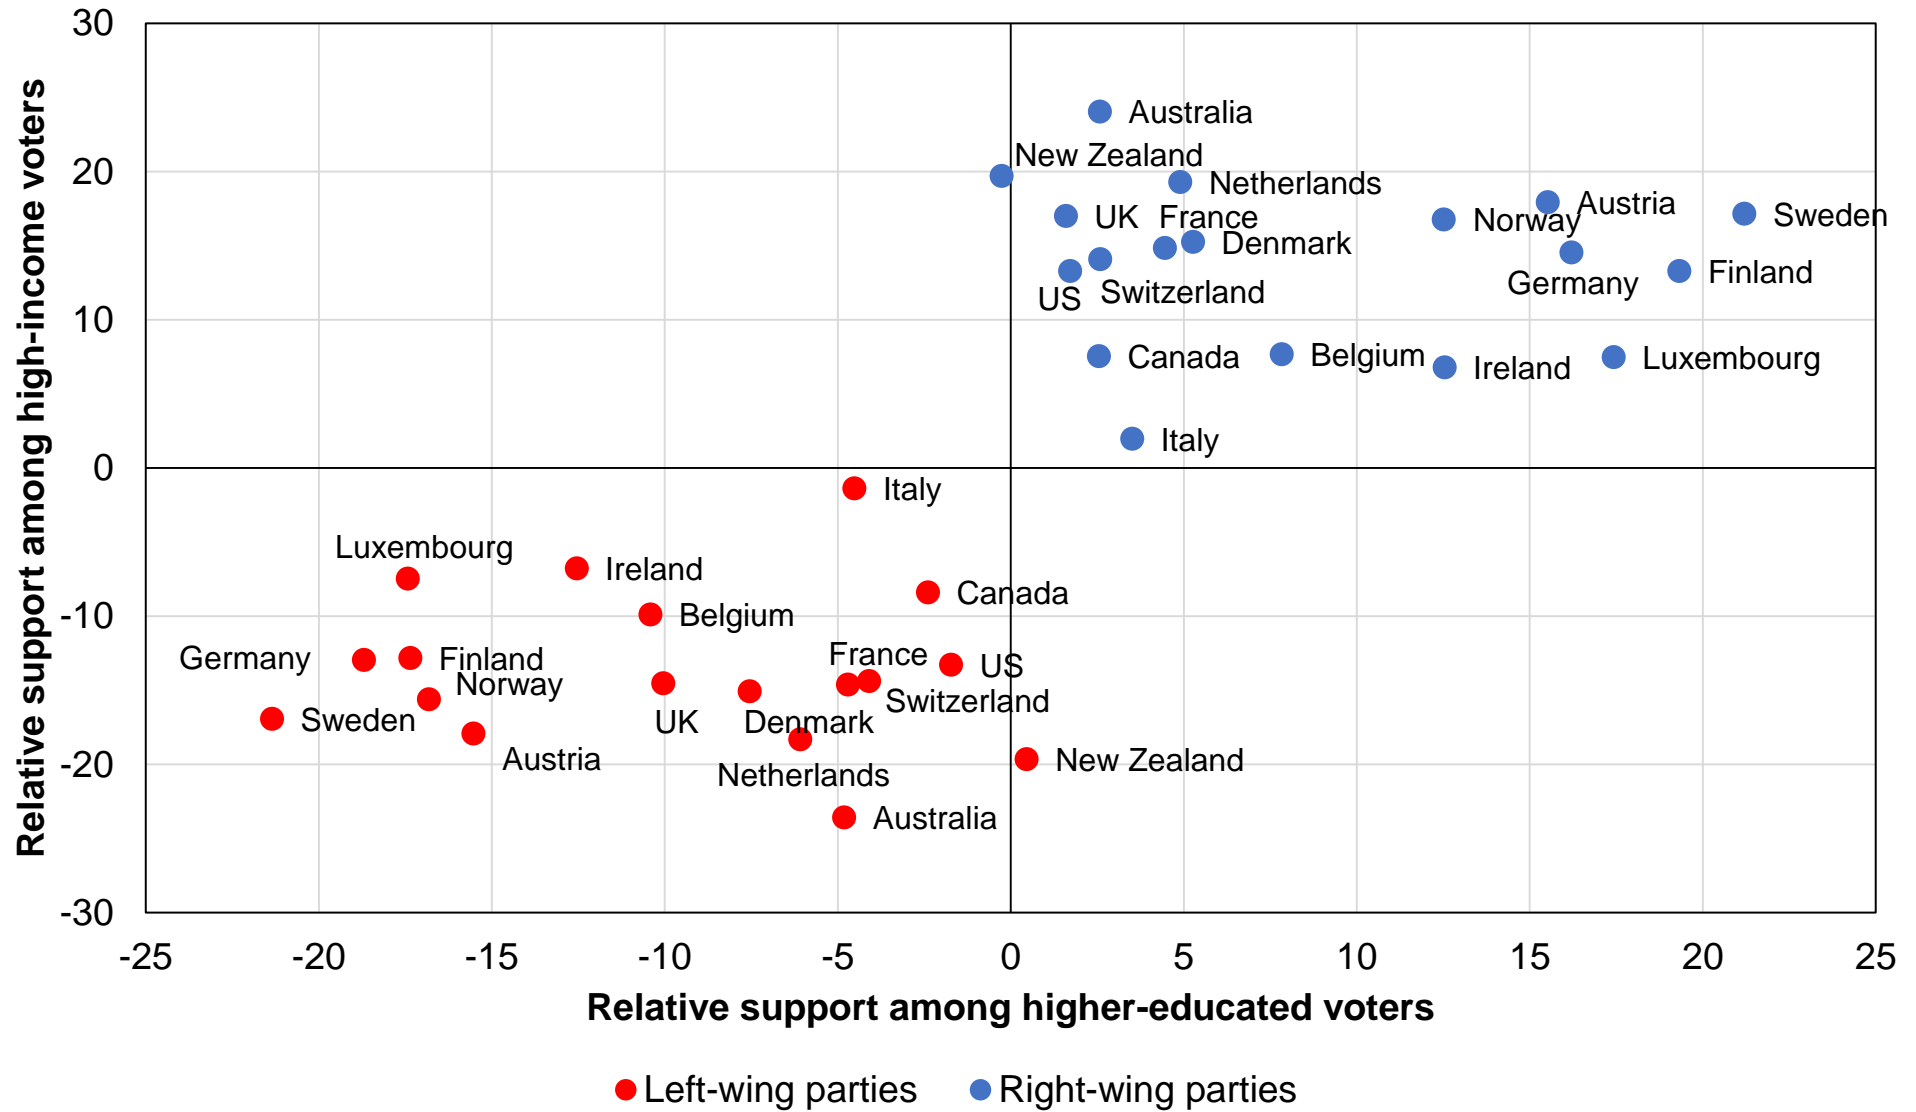



**Figure A46 - Income and educational divides in Western democracies, 1980s**

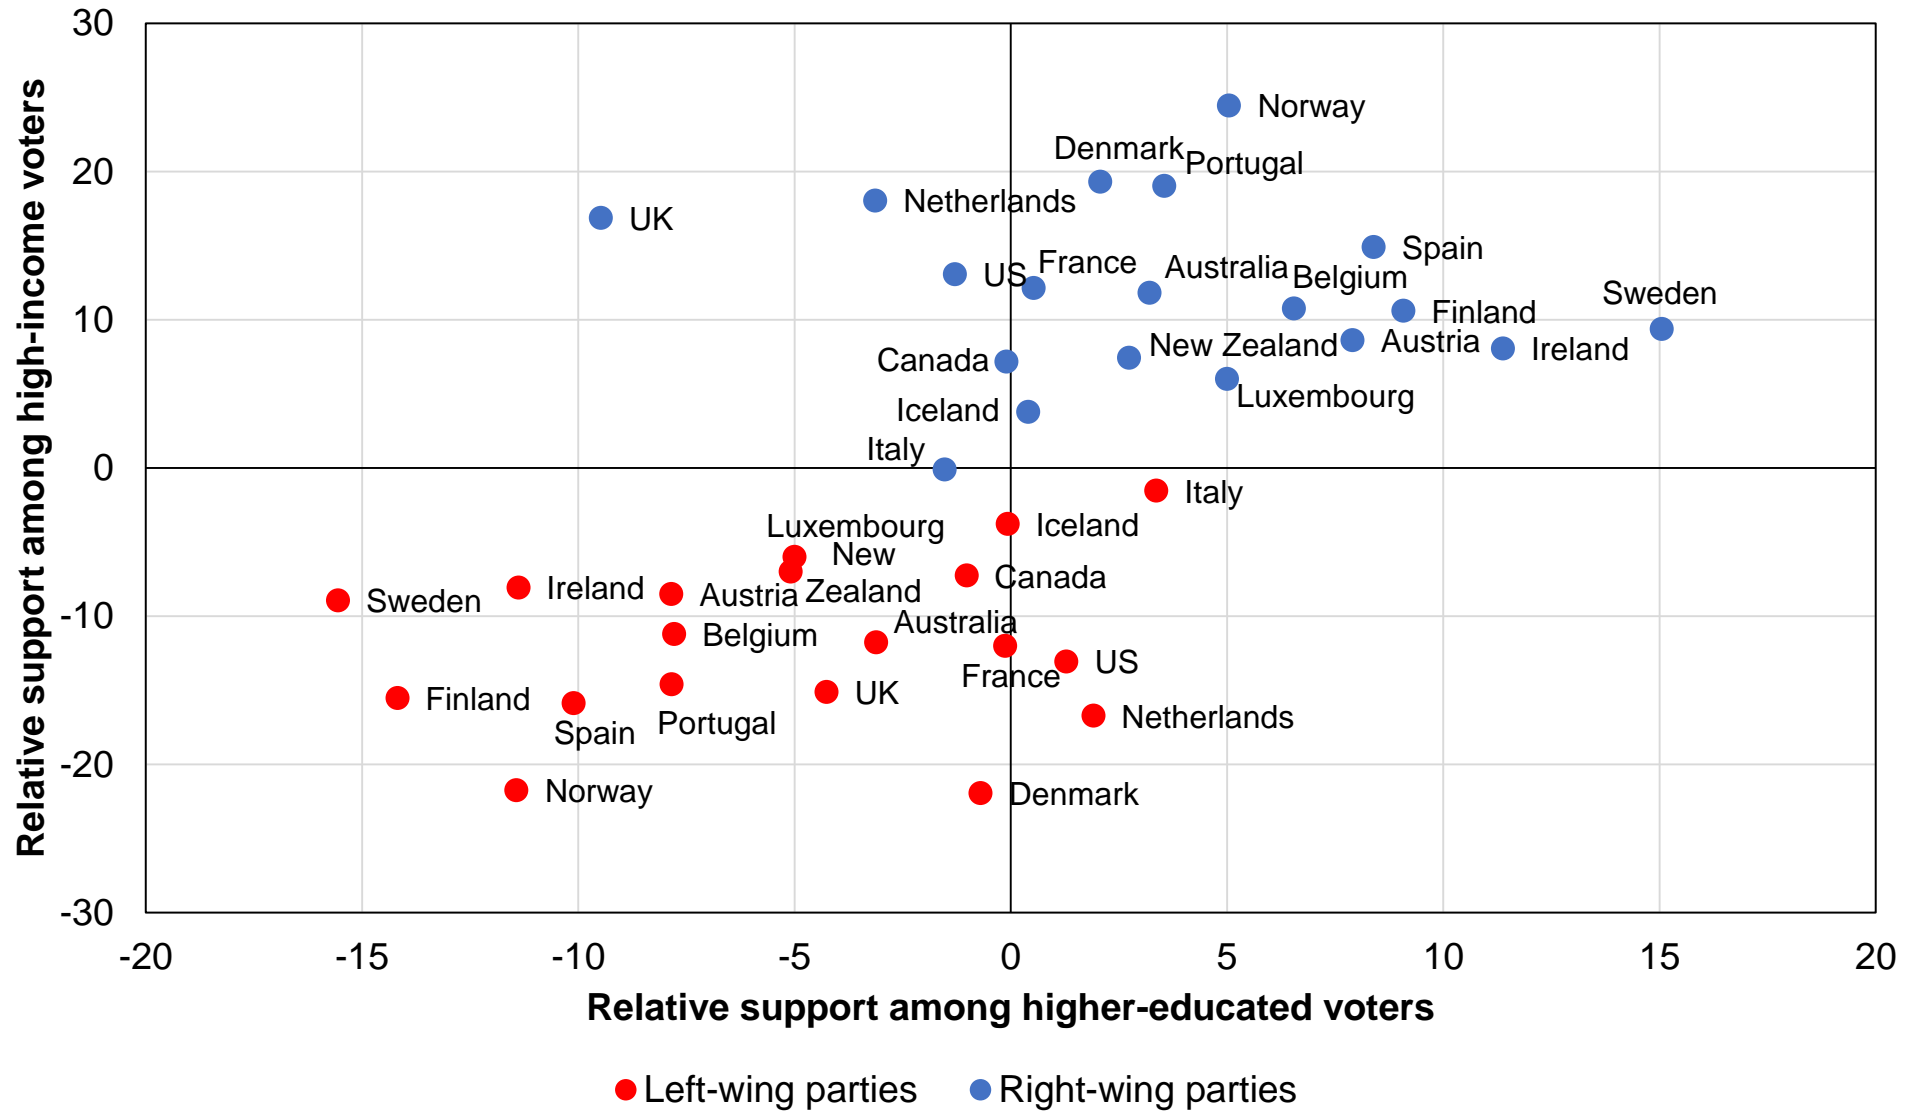

**Figure A47 - Income and educational divides in Western democracies, 1990s**

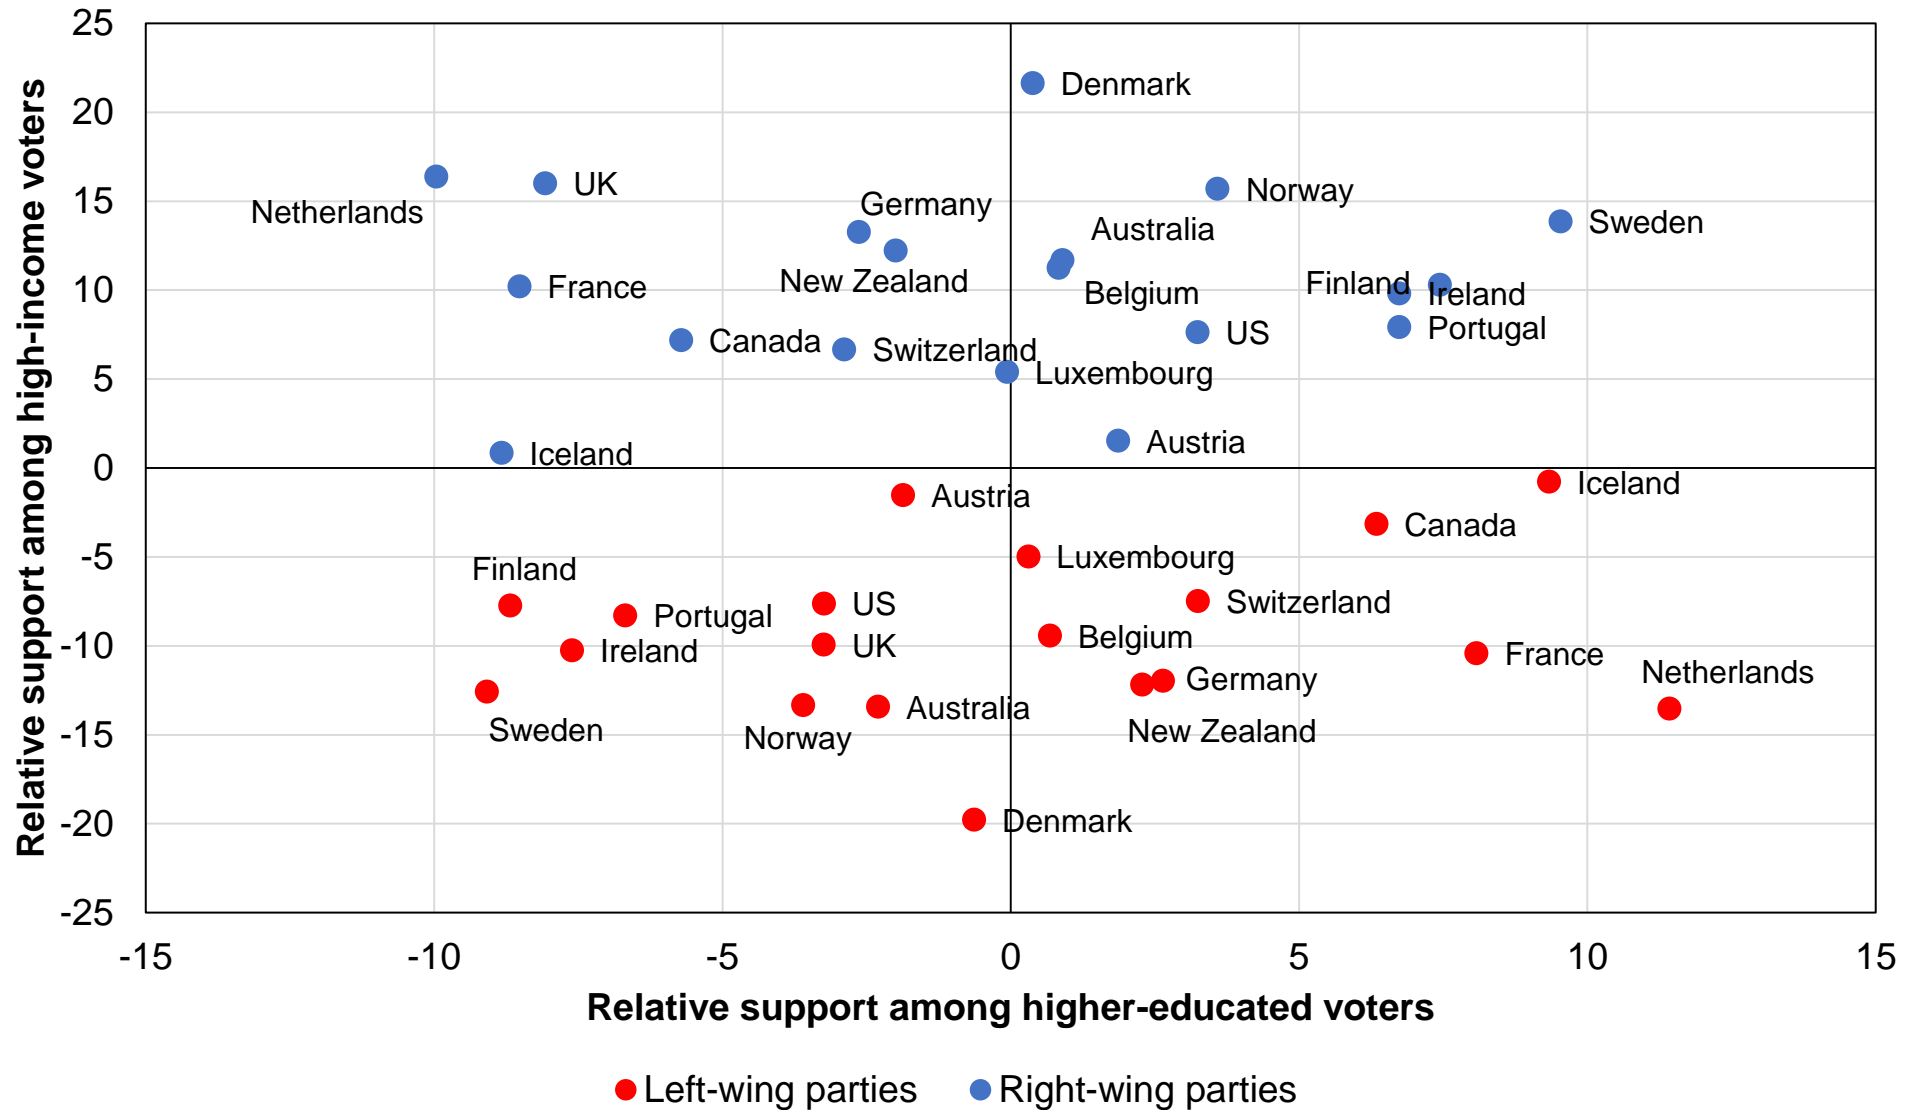

**Figure A48 - Income and educational divides in Western democracies, 2000s**

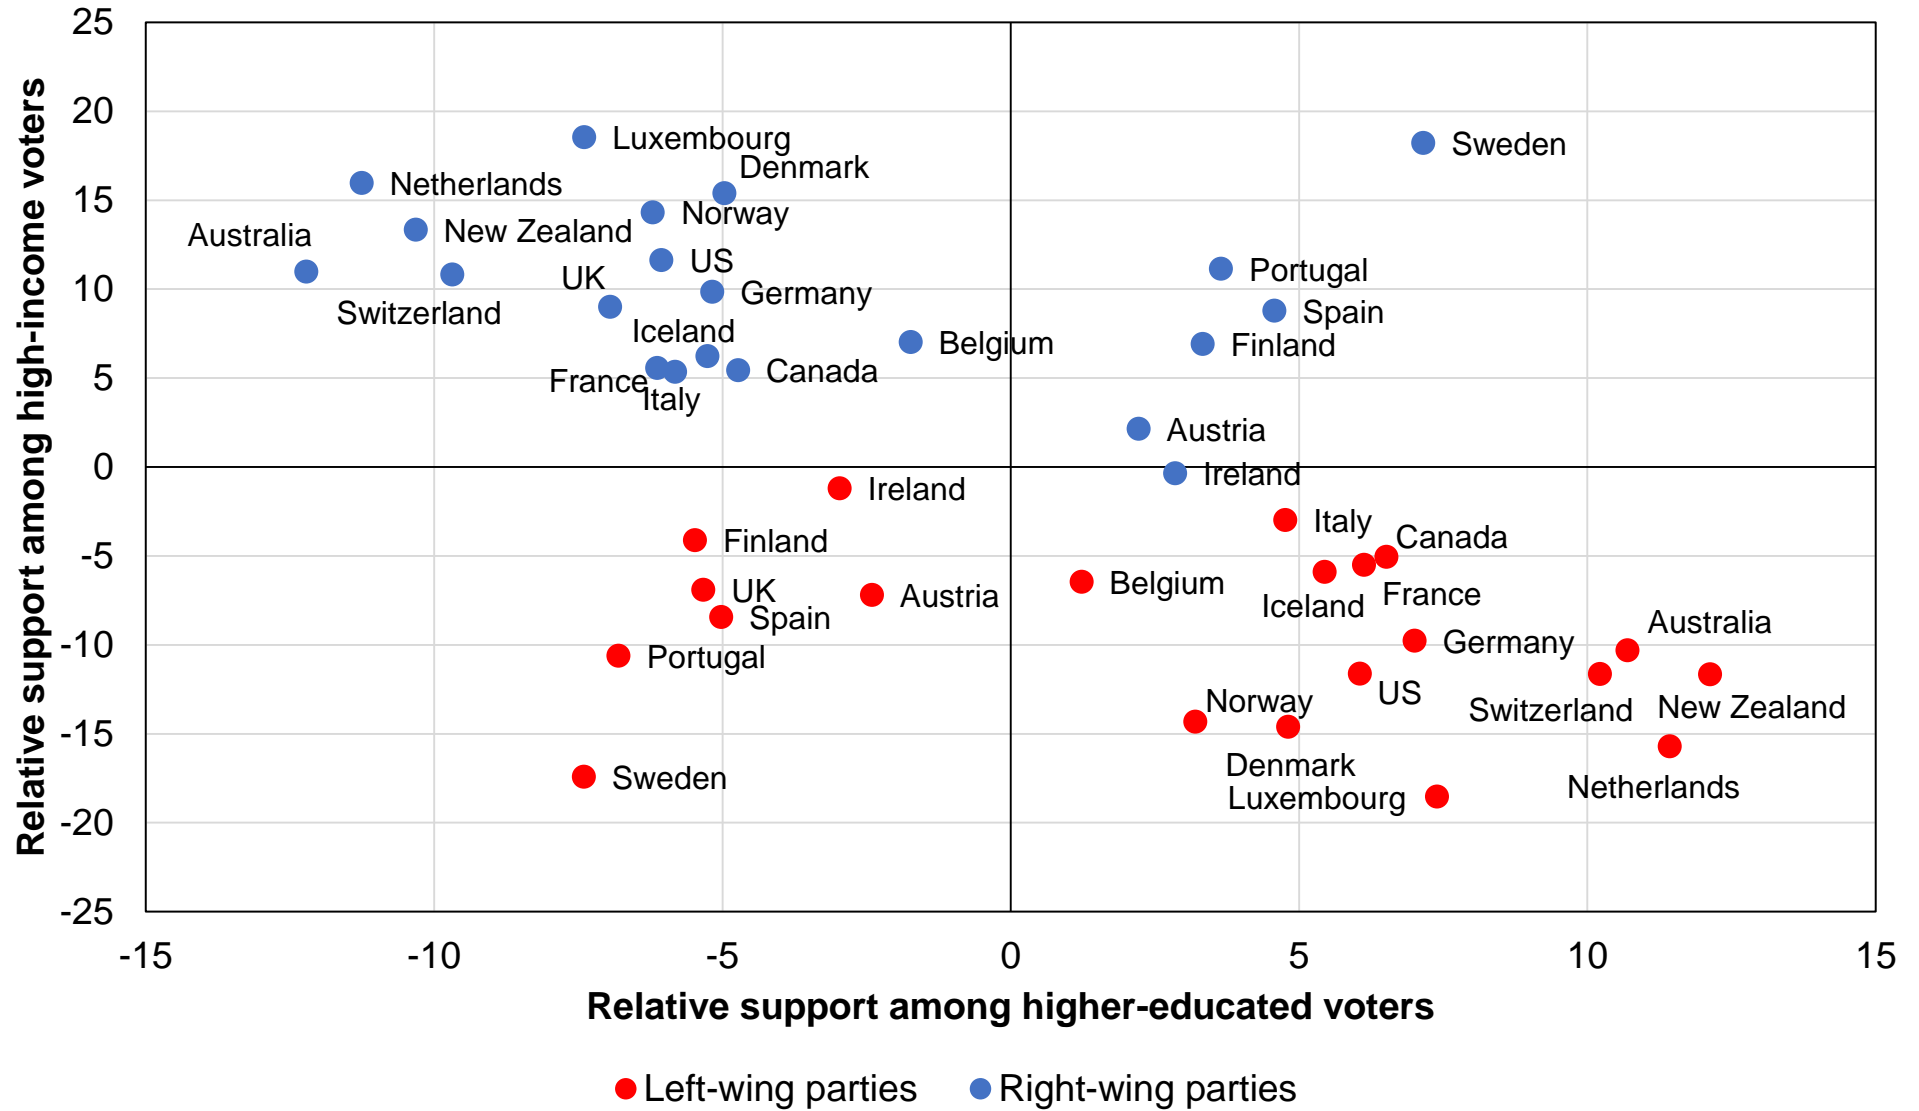

**Figure A49 - Income and educational divides in Western democracies, 2010s**

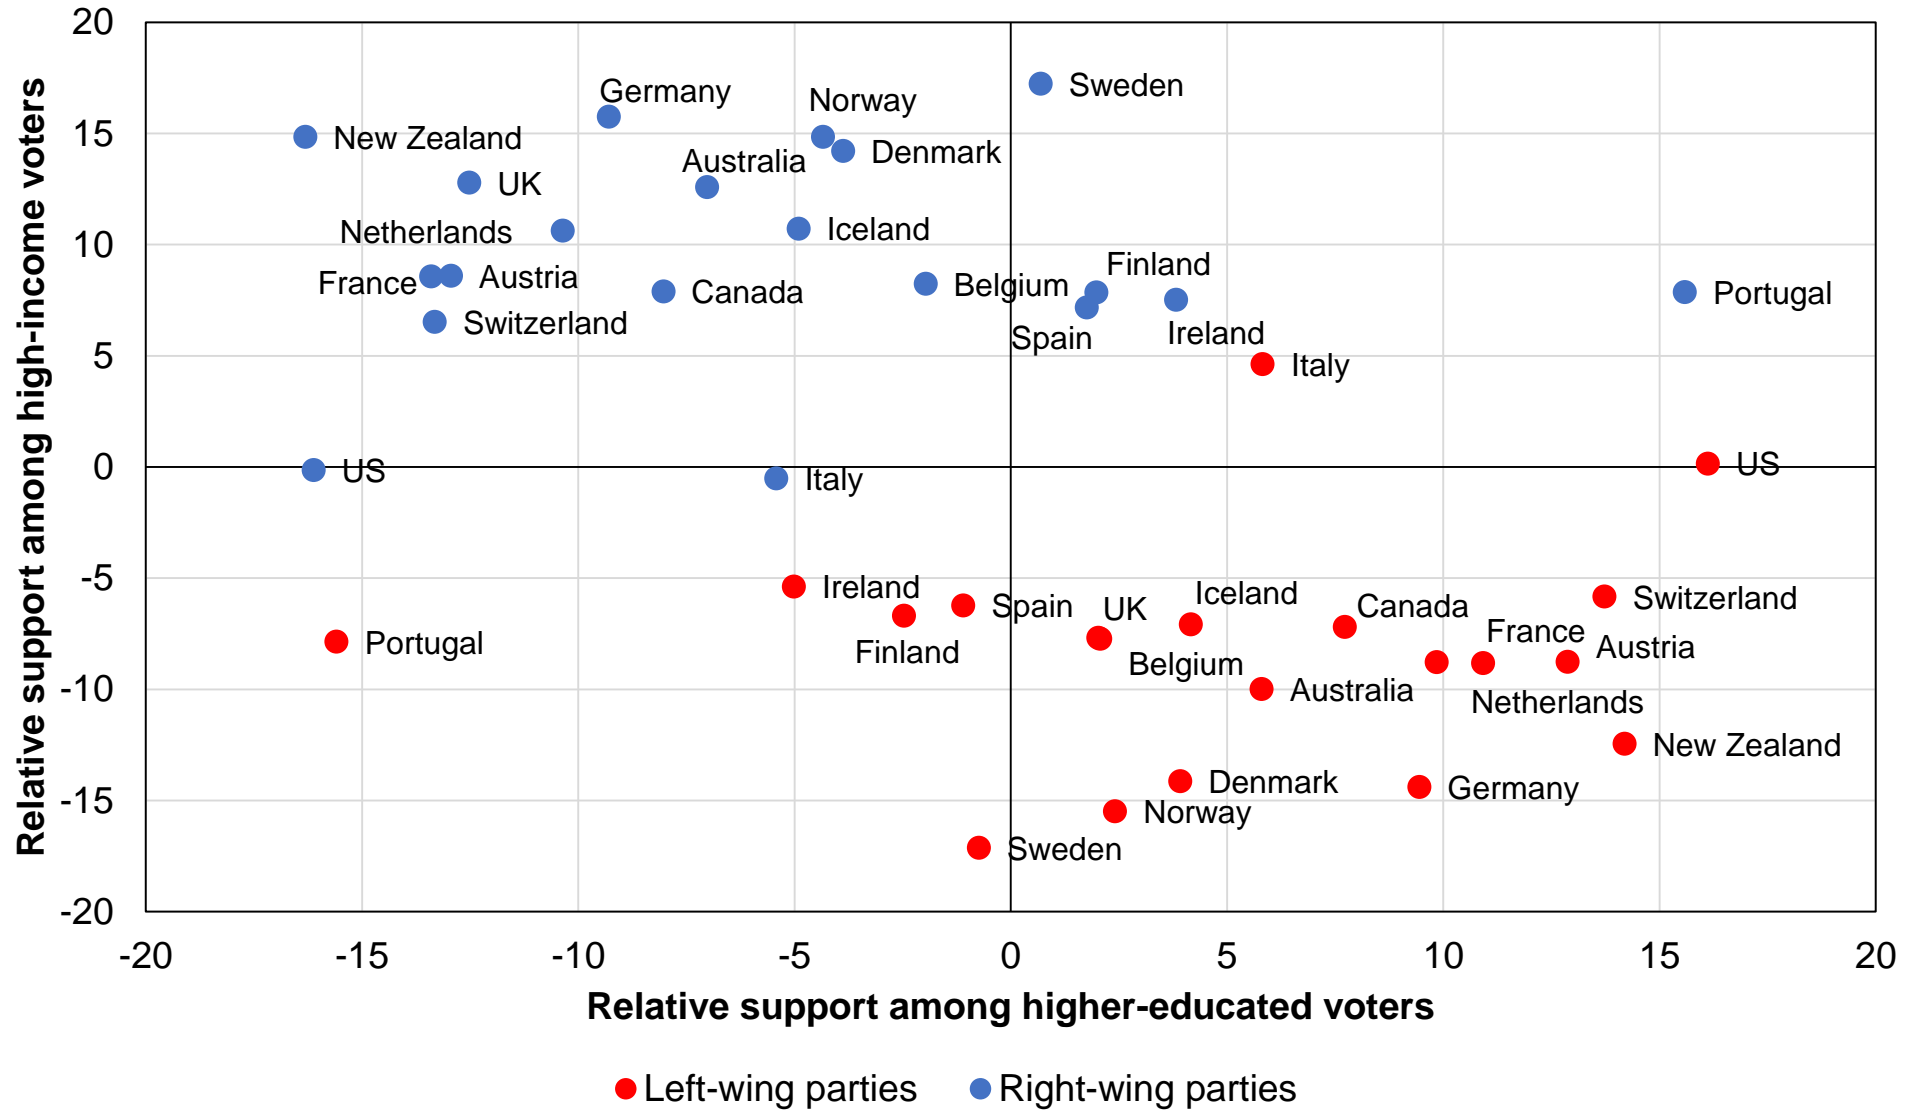

**Figure A50 - Correlation between income and education**

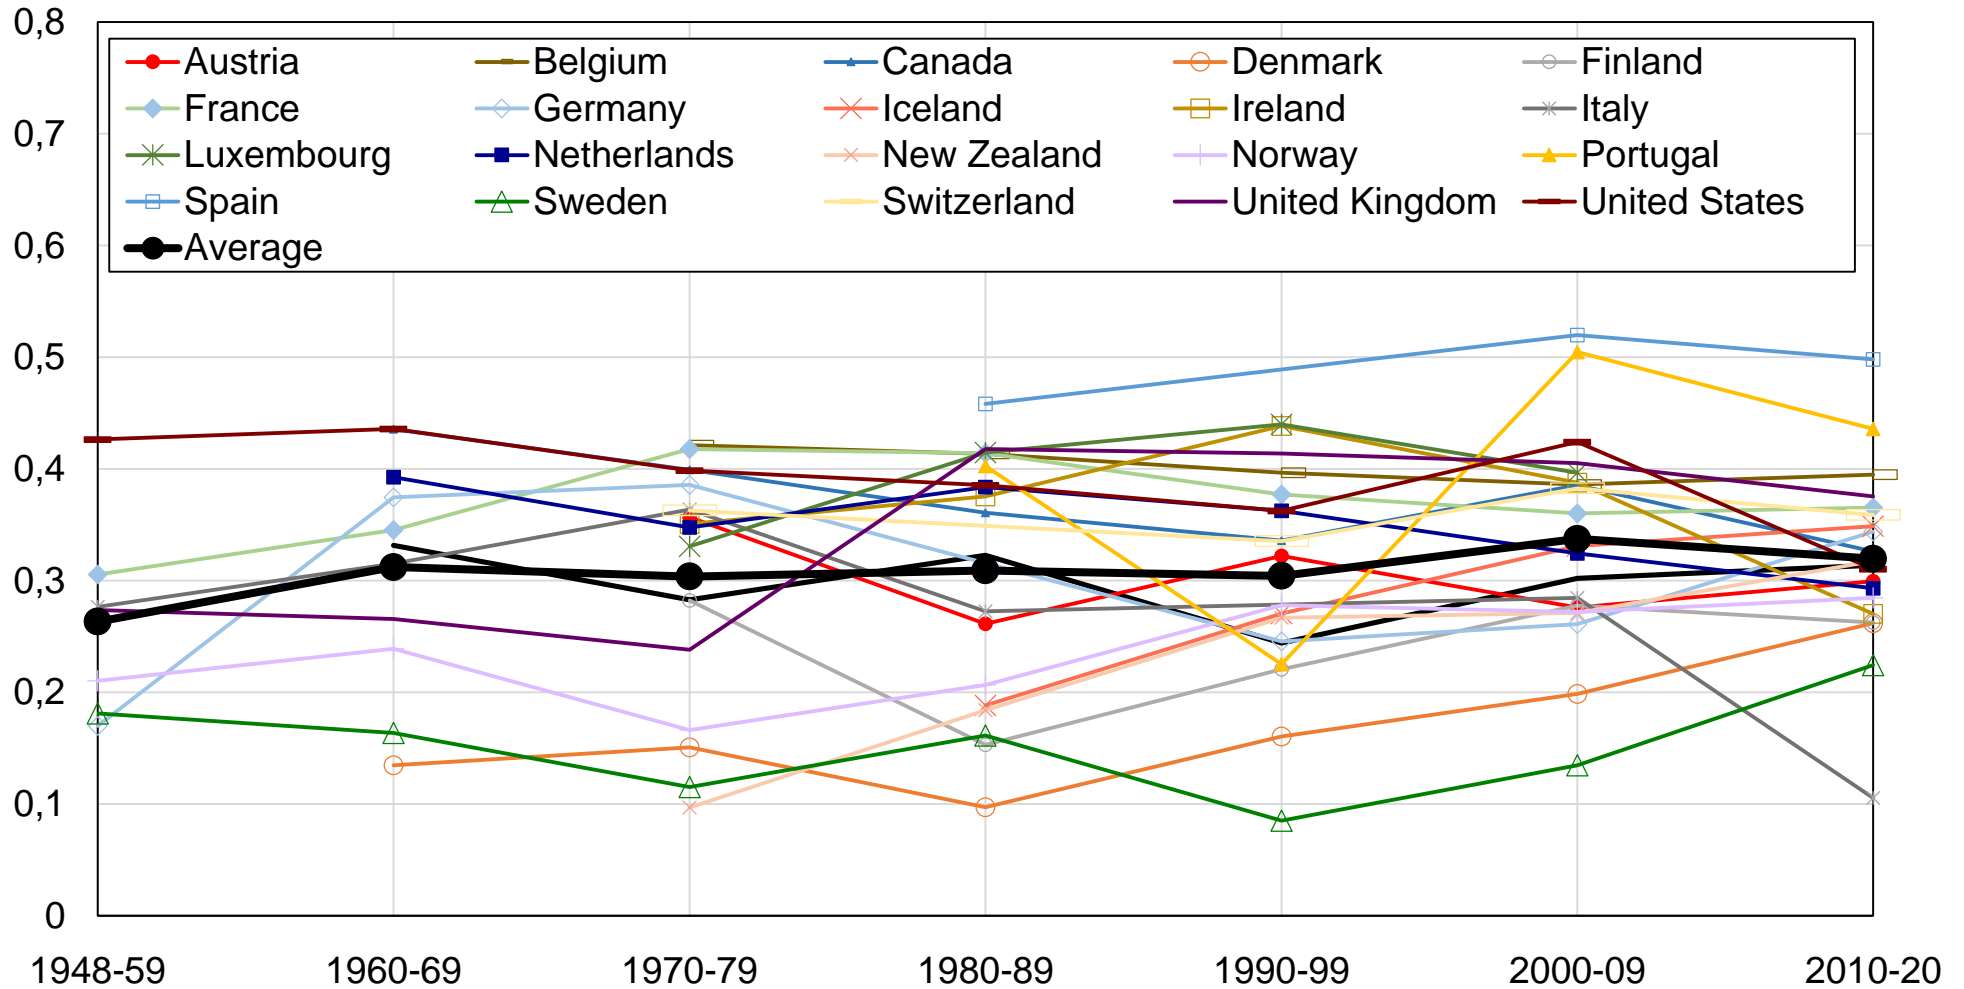

**Source:** authors' computations using the World Political Cleavages and Inequality Database.

**Note:** the figure represents the correlation between income and education in post-electoral surveys in all Western democracies. Income is defined as the rank (quantile group) to which individuals belong, computed directly from raw income brackets. Education is defined as education deciles, computed from available educational categories (see methodology).

**Figure A51 - Kitagawa-Oaxaca-Blinder decomposition of the education cleavage**

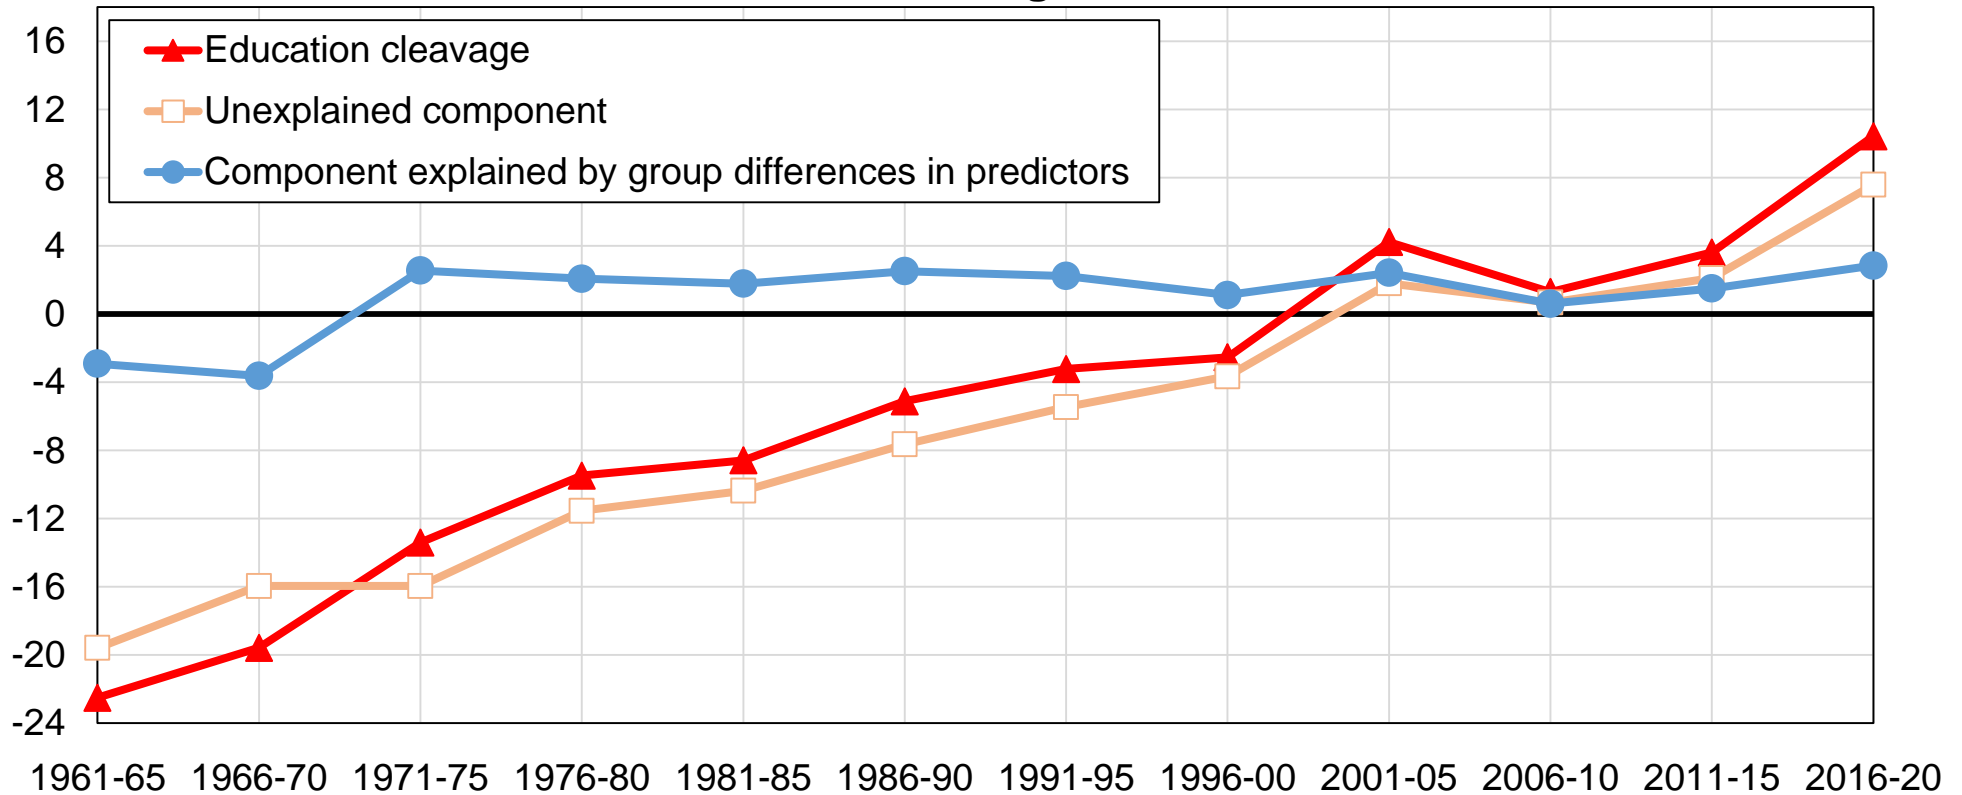

**Source:** authors' computations using the World Political Cleavages and Inequality Database.

**Note:** the figure represents a two-way Kitagawa-Oaxaca-Blinder decomposition of the educational cleavage by five-year interval, separating it into a component explained by group differences in predictors (that is, differences in the composition of educational groups in terms of income, gender, age, religion, religious practice, rural/urban location, region, employment and marital status, private/public sector of employment, union membership, and home ownership) and an unexplained component. The unexplained component is very close to the actual indicator, revealing that the reversal of educational divides cannot be accounted for by changes in the composition of education groups. The decomposition is computed after pooling surveys covering the following countries: Australia, Denmark, Finland, France, the Netherlands, Norway, New Zealand, Sweden, the United Kingdom, and the United States. All estimates include election (country-year) fixed effects.

**Table B1 - Bakker-Hobolt modified Comparative Manifesto Project measures**

**A. Economic-distributive dimension**

**Pro-free-market emphases**

Free enterprise  
 Economic incentives  
 Anti-protectionism  
 Social services limitation  
 Education limitation  
 Productivity: positive  
 Economic orthodoxy: positive  
 Labour groups: negative

**Pro-redistribution emphases**

Regulate capitalism  
 Economic planning  
 Pro-protectionism  
 Social services expansion  
 Education expansion  
 Nationalization  
 Controlled economy  
 Labour groups: positive  
 Corporatism: positive  
 Keynesian demand management: positive  
 Marxist analysis: positive  
 Social justice

**B. Sociocultural dimension**

**Conservative emphases**

Political authority  
 National way of life: positive  
 Traditional morality: positive  
 Law and order  
 Multiculturalism: negative  
 Social harmony

**Progressive emphases**

Environmental protection  
 National way of life: negative  
 Traditional morality: negative  
 Culture  
 Multiculturalism: positive  
 Anti-growth  
 Underprivileged minority groups  
 Non-economic demographic groups: positive  
 Freedom-human rights  
 Democracy

**Source:** adapted from R. Bakker and S. B. Hobolt, "Measuring Party Positions," in G. Evans and N. D. de Graaf (ed.), *Political Choice Matters: Explaining the Strength of Class and Religious Cleavages in Cross-National Perspective*, Oxford University Press, 2013, 38. For more detail on the content of each category and the Manifesto Project methodology, see <https://manifesto-project.wzb.eu/>.

**Table B2 - Ideological polarization in Western democracies, 1945-2020**

|         | Economic-distributive index |               |                  |        | Sociocultural index |               |                  |        |
|---------|-----------------------------|---------------|------------------|--------|---------------------|---------------|------------------|--------|
|         | Social Democrats            | Conservatives | Anti-immigration | Greens | Social Democrats    | Conservatives | Anti-immigration | Greens |
| 1945-59 | -12,3                       | 11,2          |                  |        | -2,2                | 2,2           |                  |        |
| 1960-69 | -9,1                        | 9,2           |                  |        | -1,1                | 0,9           |                  |        |
| 1970-79 | -9,3                        | 8,8           | 17,6             |        | -0,6                | 0,6           | 3,9              |        |
| 1980-89 | -10,9                       | 10,9          | 15,8             | -8,5   | -1,9                | 2,5           | 3,4              | -24,1  |
| 1990-99 | -9,9                        | 8,2           | 11,6             | -11,5  | -3,6                | 5,2           | 7,1              | -25,4  |
| 2000-09 | -9,4                        | 8,1           | 10,4             | -6,8   | -4,9                | 6,3           | 11,2             | -24,8  |
| 2010-20 | -13,5                       | 11,2          | 8,7              | -11,2  | -5,4                | 4,4           | 20,4             | -25,1  |

**Source:** authors' computations using the Comparative Manifesto Project database.

**Note:** the table displays the average economic-distributive and sociocultural scores by decade for four families of parties across all Western democracies: social democratic, socialist and other left-wing parties; conservative, Christian democratic, and liberal parties; anti-immigration parties; and green parties. Negative values on the economic-distributive index correspond to greater proportions of pro-redistribution emphases relatively to pro-free-market emphases in party manifestos. Negative values on the sociocultural index correspond to greater proportions of progressive emphases relatively to conservative emphases. Indices are normalized by the average score by decade so as to better highlight the dynamics of polarization.



**Table B3 - Sources of ideological polarization in Western democracies in the 2010s**

|                                        | Greens | Social Democrats | Conservatives | Anti-immigration |
|----------------------------------------|--------|------------------|---------------|------------------|
| <b>Sociocultural dimension</b>         |        |                  |               |                  |
| <u>Conservative emphases</u>           |        |                  |               |                  |
| Law and order +                        | 1,4    | 3,0              | 5,2           | 8,5              |
| Political authority                    | 1,4    | 2,9              | 2,9           | 3,1              |
| Civic mindedness +                     | 1,2    | 1,3              | 1,7           | 0,8              |
| National way of life +                 | 0,8    | 1,1              | 2,4           | 9,0              |
| Traditional morality +                 | 0,3    | 0,5              | 1,4           | 2,4              |
| Multiculturalism -                     | 0,2    | 0,3              | 1,0           | 5,0              |
| <u>Progressive emphases</u>            |        |                  |               |                  |
| Environmentalism +                     | 13,4   | 5,8              | 4,3           | 3,0              |
| Democracy                              | 3,2    | 3,2              | 2,0           | 4,4              |
| Anti-growth economy +                  | 6,9    | 2,8              | 1,9           | 0,8              |
| Culture +                              | 2,5    | 2,4              | 2,1           | 1,6              |
| Freedom & human rights                 | 3,7    | 1,8              | 2,4           | 2,2              |
| Non-economic demographic groups        | 1,1    | 1,4              | 1,3           | 1,1              |
| Multiculturalism +                     | 1,5    | 1,1              | 0,8           | 0,3              |
| Minority groups                        | 0,7    | 0,7              | 0,5           | 0,4              |
| Traditional morality -                 | 0,9    | 0,6              | 0,3           | 0,1              |
| National way of life -                 | 1,1    | 0,4              | 0,5           | 0,1              |
| <b>Economic-distributive dimension</b> |        |                  |               |                  |
| <u>Pro-free-market emphases</u>        |        |                  |               |                  |
| Incentives                             | 1,2    | 2,1              | 3,7           | 2,0              |
| Economic growth +                      | 0,6    | 1,8              | 3,0           | 0,6              |
| Economic orthodoxy                     | 0,6    | 1,2              | 2,9           | 1,1              |
| Protectionism -                        | 0,1    | 0,3              | 0,6           | 0,2              |
| Free market economy                    | 0,5    | 0,3              | 2,7           | 2,5              |
| Welfare -                              | 0,2    | 0,2              | 1,5           | 1,7              |
| Labour groups -                        | 0,0    | 0,0              | 0,4           | 0,2              |
| Education -                            | 0,0    | 0,0              | 0,2           | 0,3              |
| <u>Pro-redistribution emphases</u>     |        |                  |               |                  |
| Welfare +                              | 11,1   | 12,8             | 9,0           | 8,4              |
| Equality +                             | 9,6    | 8,8              | 4,4           | 3,1              |
| Education +                            | 6,1    | 6,5              | 5,4           | 3,9              |
| Labour groups +                        | 4,5    | 5,8              | 3,0           | 2,3              |
| Market regulation                      | 3,4    | 4,9              | 3,0           | 2,8              |
| Controlled economy                     | 0,9    | 1,0              | 0,3           | 0,5              |
| Nationalisation                        | 0,7    | 0,8              | 0,2           | 0,3              |
| Keynesian demand management            | 0,2    | 0,6              | 0,2           | 0,2              |
| Economic planning                      | 0,3    | 0,4              | 0,5           | 0,2              |
| Corporatism/mixed economy              | 0,3    | 0,3              | 0,3           | 0,1              |
| Protectionism +                        | 0,3    | 0,3              | 0,3           | 0,7              |
| <b>Other categories</b>                |        |                  |               |                  |
| Technology & infrastructure            | 6,0    | 6,9              | 7,6           | 4,2              |
| Gov-admin efficiency                   | 1,5    | 2,8              | 4,7           | 3,3              |
| Internationalism +                     | 2,5    | 2,6              | 2,3           | 1,4              |
| Decentralisation                       | 1,3    | 1,5              | 1,8           | 1,3              |
| Europe +                               | 1,1    | 1,3              | 1,6           | 0,2              |

|                               |     |     |     |     |
|-------------------------------|-----|-----|-----|-----|
| Agriculture +                 | 1,2 | 1,2 | 2,0 | 2,2 |
| Military +                    | 0,2 | 1,1 | 2,1 | 2,5 |
| Economic goals                | 0,5 | 1,1 | 1,2 | 0,6 |
| Political corruption          | 0,8 | 0,8 | 0,5 | 0,5 |
| Military -                    | 0,9 | 0,5 | 0,1 | 0,2 |
| Peace                         | 0,4 | 0,4 | 0,2 | 0,0 |
| Europe -                      | 0,4 | 0,3 | 0,6 | 6,3 |
| Foreign special +             | 0,1 | 0,3 | 0,3 | 0,0 |
| Constitution -                | 0,2 | 0,3 | 0,2 | 0,2 |
| Middle class and prof. groups | 0,1 | 0,2 | 0,4 | 0,2 |
| Constitution +                | 0,2 | 0,2 | 0,4 | 0,1 |
| Internationalism -            | 0,1 | 0,1 | 0,2 | 1,5 |
| Anti-imperialism              | 0,1 | 0,1 | 0,0 | 0,1 |
| Marxist analysis +            | 0,0 | 0,1 | 0,0 | 0,0 |
| Centralisation                | 0,3 | 0,1 | 0,3 | 0,4 |
| Foreign special -             | 0,0 | 0,0 | 0,0 | 0,0 |

**Note:** The table reports the scores of green parties, social democratic / socialist / communist / other left-wing parties, conservative / Christian democratic / liberal parties, and anti-immigration parties on all the items available in the Comparative Manifesto Project database over the 2010-2020 period. Values correspond to the share of "quasi-sentences" dedicated to emphasizing each category of issues in parties' manifestos. Vote-share-weighted average over all parties with available data in the corresponding decade.

**Table B4 - Manifesto scores of anti-immigration parties**

|                                        | 1970s | 1980s | 1990s | 2000s | 2010s |
|----------------------------------------|-------|-------|-------|-------|-------|
| <b>Sociocultural dimension</b>         |       |       |       |       |       |
| <u>Conservative emphases</u>           |       |       |       |       |       |
| National way of life +                 | 0,6   | 2,0   | 4,2   | 4,7   | 9,0   |
| Law and order +                        | 1,2   | 3,3   | 5,4   | 7,5   | 8,5   |
| Multiculturalism -                     | 0,0   | 0,9   | 0,9   | 4,0   | 5,0   |
| Political authority                    | 2,7   | 2,8   | 4,7   | 3,9   | 3,1   |
| Traditional morality +                 | 1,7   | 2,6   | 3,5   | 2,3   | 2,4   |
| Civic mindedness +                     | 1,0   | 0,7   | 1,2   | 1,3   | 0,8   |
| <u>Progressive emphases</u>            |       |       |       |       |       |
| Democracy                              | 2,6   | 2,6   | 3,2   | 2,2   | 4,4   |
| Environmentalism +                     | 3,8   | 4,6   | 4,3   | 4,2   | 3,0   |
| Freedom & human rights                 | 2,5   | 2,8   | 4,8   | 2,7   | 2,2   |
| Culture +                              | 0,9   | 2,3   | 2,1   | 2,1   | 1,6   |
| Non-economic demographic groups        | 3,5   | 5,0   | 2,3   | 1,9   | 1,1   |
| Anti-growth economy +                  | 0,0   | 0,0   | 0,1   | 0,3   | 0,8   |
| Minority groups                        | 0,7   | 1,4   | 0,7   | 0,8   | 0,4   |
| Multiculturalism +                     | 0,1   | 0,2   | 0,8   | 0,2   | 0,3   |
| Traditional morality -                 | 0,4   | 0,1   | 0,0   | 0,2   | 0,1   |
| National way of life -                 | 0,0   | 0,2   | 0,0   | 0,0   | 0,1   |
| <b>Economic-distributive dimension</b> |       |       |       |       |       |
| <u>Pro-free-market emphases</u>        |       |       |       |       |       |
| Free market economy                    | 5,7   | 6,3   | 5,2   | 3,9   | 2,5   |
| Incentives                             | 1,4   | 2,5   | 3,1   | 2,9   | 2,0   |
| Welfare -                              | 1,2   | 2,8   | 2,1   | 1,6   | 1,7   |
| Economic orthodoxy                     | 5,2   | 4,9   | 2,8   | 2,4   | 1,1   |
| Economic growth +                      | 1,6   | 1,0   | 1,1   | 1,1   | 0,6   |
| Education -                            | 0,8   | 0,2   | 0,1   | 0,1   | 0,3   |
| Protectionism -                        | 0,1   | 0,6   | 0,1   | 0,5   | 0,2   |
| Labour groups -                        | 0,1   | 0,5   | 0,2   | 0,2   | 0,2   |
| <u>Pro-redistribution emphases</u>     |       |       |       |       |       |
| Welfare +                              | 4,0   | 3,1   | 4,5   | 6,9   | 8,4   |
| Education +                            | 2,1   | 3,0   | 3,3   | 4,3   | 3,9   |
| Equality +                             | 3,6   | 1,2   | 2,3   | 3,3   | 3,1   |
| Market regulation                      | 0,8   | 1,8   | 1,8   | 1,1   | 2,8   |
| Labour groups +                        | 1,0   | 1,0   | 1,3   | 1,9   | 2,3   |
| Protectionism +                        | 0,1   | 0,4   | 0,5   | 0,9   | 0,7   |
| Controlled economy                     | 0,4   | 0,7   | 0,2   | 0,5   | 0,5   |
| Nationalisation                        | 0,1   | 0,0   | 0,1   | 0,2   | 0,3   |
| Keynesian demand management            | 0,1   | 0,0   | 0,0   | 0,2   | 0,2   |
| Economic planning                      | 0,4   | 0,2   | 0,2   | 0,1   | 0,2   |
| Corporatism/mixed economy              | 0,7   | 0,5   | 0,0   | 0,0   | 0,1   |
| <b>Other categories</b>                |       |       |       |       |       |
| Europe -                               | 0,1   | 0,3   | 1,1   | 2,7   | 6,3   |
| Technology & infrastructure            | 2,5   | 3,0   | 3,5   | 5,7   | 4,2   |
| Gov-admin efficiency                   | 5,7   | 4,9   | 6,7   | 4,5   | 3,3   |
| Military +                             | 1,1   | 2,7   | 2,4   | 2,7   | 2,5   |
| Agriculture +                          | 2,3   | 2,0   | 2,7   | 2,1   | 2,2   |

|                               |     |     |     |     |     |
|-------------------------------|-----|-----|-----|-----|-----|
| Internationalism -            | 1,3 | 1,4 | 0,7 | 1,6 | 1,5 |
| Internationalism +            | 2,5 | 1,8 | 1,8 | 1,1 | 1,4 |
| Decentralisation              | 0,8 | 1,7 | 2,5 | 2,5 | 1,3 |
| Economic goals                | 2,7 | 2,6 | 1,6 | 1,0 | 0,6 |
| Political corruption          | 0,2 | 2,0 | 3,2 | 0,8 | 0,5 |
| Centralisation                | 0,6 | 0,5 | 0,1 | 0,1 | 0,4 |
| Middle class and prof. groups | 0,6 | 0,3 | 0,5 | 0,4 | 0,2 |
| Constitution -                | 0,6 | 0,2 | 0,2 | 0,1 | 0,2 |
| Military -                    | 0,3 | 0,1 | 0,2 | 0,1 | 0,2 |
| Europe +                      | 0,5 | 0,7 | 0,9 | 0,6 | 0,2 |
| Constitution +                | 1,3 | 0,3 | 1,0 | 0,3 | 0,1 |
| Anti-imperialism              | 0,0 | 0,0 | 0,0 | 0,0 | 0,1 |
| Peace                         | 0,0 | 0,3 | 0,2 | 0,1 | 0,0 |
| Foreign special +             | 0,1 | 0,2 | 0,2 | 0,3 | 0,0 |
| Marxist analysis +            | 0,0 | 0,0 | 0,0 | 0,0 | 0,0 |
| Foreign special -             | 0,1 | 0,0 | 0,0 | 0,0 | 0,0 |

**Note:** The table reports the scores of anti-immigration parties on all the items available in the Comparative Manifesto Project database. Values correspond to the share of "quasi-sentences" dedicated to emphasizing each category of issues in parties' manifestos. Vote-share-weighted average over all parties with available data in the corresponding decade. Figure are ranked in decreasing order of their magnitude in the 2010s.

**Table B5 - Manifesto scores of green parties**

|                                        | 1980s | 1990s | 2000s | 2010s |
|----------------------------------------|-------|-------|-------|-------|
| <b>Sociocultural dimension</b>         |       |       |       |       |
| <u>Conservative emphases</u>           |       |       |       |       |
| Law and order +                        | 1,1   | 1,1   | 2,0   | 1,4   |
| Political authority                    | 18,6  | 4,1   | 2,7   | 1,4   |
| Civic mindedness +                     | 1,0   | 1,4   | 1,4   | 1,2   |
| National way of life +                 | 0,1   | 0,7   | 0,6   | 0,8   |
| Traditional morality +                 | 0,3   | 0,4   | 0,3   | 0,3   |
| Multiculturalism -                     | 0,1   | 0,1   | 0,2   | 0,2   |
| <u>Progressive emphases</u>            |       |       |       |       |
| Environmentalism +                     | 12,2  | 16,7  | 13,3  | 13,4  |
| Anti-growth economy +                  | 2,9   | 2,7   | 3,9   | 6,9   |
| Freedom & human rights                 | 2,3   | 2,1   | 2,5   | 3,7   |
| Democracy                              | 6,7   | 6,2   | 4,0   | 3,2   |
| Culture +                              | 1,8   | 2,2   | 2,6   | 2,5   |
| Multiculturalism +                     | 0,3   | 0,8   | 1,2   | 1,5   |
| Non-economic demographic groups        | 3,3   | 4,4   | 2,7   | 1,1   |
| National way of life -                 | 0,1   | 0,3   | 0,1   | 1,1   |
| Traditional morality -                 | 0,4   | 0,7   | 0,8   | 0,9   |
| Minority groups                        | 1,7   | 2,4   | 2,0   | 0,7   |
| <b>Economic-distributive dimension</b> |       |       |       |       |
| <u>Pro-free-market emphases</u>        |       |       |       |       |
| Incentives                             | 0,7   | 0,7   | 2,4   | 1,2   |
| Economic growth +                      | 1,2   | 0,9   | 2,2   | 0,6   |
| Economic orthodoxy                     | 0,5   | 1,0   | 0,5   | 0,6   |
| Free market economy                    | 0,2   | 0,2   | 0,2   | 0,5   |
| Welfare -                              | 0,0   | 0,0   | 0,1   | 0,2   |
| Protectionism -                        | 0,0   | 0,1   | 0,1   | 0,1   |
| Education -                            | 0,0   | 0,0   | 0,0   | 0,0   |
| Labour groups -                        | 0,0   | 0,0   | 0,0   | 0,0   |
| <u>Pro-redistribution emphases</u>     |       |       |       |       |
| Welfare +                              | 5,3   | 8,1   | 8,1   | 11,1  |
| Equality +                             | 2,7   | 7,7   | 9,7   | 9,6   |
| Education +                            | 1,5   | 3,2   | 4,5   | 6,1   |
| Labour groups +                        | 4,2   | 2,6   | 3,4   | 4,5   |
| Market regulation                      | 1,2   | 2,4   | 2,4   | 3,4   |
| Controlled economy                     | 0,3   | 0,6   | 0,7   | 0,9   |
| Nationalisation                        | 0,4   | 0,6   | 0,8   | 0,7   |
| Protectionism +                        | 0,2   | 0,3   | 0,2   | 0,3   |
| Corporatism/mixed economy              | 0,0   | 0,1   | 0,2   | 0,3   |
| Economic planning                      | 0,3   | 0,4   | 0,1   | 0,3   |
| Keynesian demand management            | 0,1   | 0,0   | 0,2   | 0,2   |
| <b>Other categories</b>                |       |       |       |       |
| Technology & infrastructure            | 2,3   | 3,7   | 4,8   | 6,0   |
| Internationalism +                     | 3,4   | 3,6   | 3,2   | 2,5   |
| Gov-admin efficiency                   | 2,0   | 2,7   | 2,3   | 1,5   |
| Decentralisation                       | 2,2   | 1,3   | 1,3   | 1,3   |
| Agriculture +                          | 1,4   | 1,7   | 2,1   | 1,2   |

|                               |     |     |     |     |
|-------------------------------|-----|-----|-----|-----|
| Europe +                      | 0,5 | 1,2 | 1,5 | 1,1 |
| Military -                    | 3,0 | 1,6 | 1,5 | 0,9 |
| Political corruption          | 1,9 | 0,5 | 0,8 | 0,8 |
| Economic goals                | 1,8 | 2,7 | 1,5 | 0,5 |
| Europe -                      | 0,7 | 1,1 | 0,7 | 0,4 |
| Peace                         | 1,7 | 0,6 | 0,8 | 0,4 |
| Centralisation                | 0,0 | 0,0 | 0,2 | 0,3 |
| Constitution -                | 0,1 | 0,2 | 0,0 | 0,2 |
| Military +                    | 0,4 | 0,2 | 0,2 | 0,2 |
| Constitution +                | 1,4 | 0,4 | 0,2 | 0,2 |
| Middle class and prof. groups | 0,3 | 0,3 | 0,5 | 0,1 |
| Internationalism -            | 0,1 | 0,2 | 0,4 | 0,1 |
| Foreign special +             | 0,4 | 0,1 | 0,1 | 0,1 |
| Anti-imperialism              | 0,7 | 0,1 | 0,1 | 0,1 |
| Marxist analysis +            | 0,7 | 0,0 | 0,2 | 0,0 |
| Foreign special -             | 0,0 | 0,0 | 0,0 | 0,0 |

**Note:** The table reports the scores of green parties on all the items available in the Comparative Manifesto Project database. Values correspond to the share of "quasi-sentences" dedicated to emphasizing each category of issues in parties' manifestos. Vote-share-weighted average over all parties with available data in the corresponding decade. Figure are ranked in decreasing order of their magnitude in the 2010s.

**Table B6 - Manifesto scores of Social Democratic / Socialist / Other left-wing parties**

|                                        | 1950s | 1960s | 1970s | 1980s | 1990s | 2000s | 2010s |
|----------------------------------------|-------|-------|-------|-------|-------|-------|-------|
| <b>Sociocultural dimension</b>         |       |       |       |       |       |       |       |
| <u>Conservative emphases</u>           |       |       |       |       |       |       |       |
| Law and order +                        | 0,2   | 0,6   | 1,4   | 1,9   | 2,7   | 4,2   | 3,0   |
| Political authority                    | 3,5   | 2,3   | 3,4   | 2,9   | 4,3   | 4,0   | 2,9   |
| Civic mindedness +                     | 2,3   | 1,6   | 1,7   | 2,1   | 2,1   | 1,6   | 1,3   |
| National way of life +                 | 0,8   | 0,9   | 0,4   | 0,6   | 0,8   | 1,5   | 1,1   |
| Traditional morality +                 | 0,4   | 0,3   | 0,3   | 0,4   | 1,0   | 0,7   | 0,5   |
| Multiculturalism -                     | 0,6   | 0,3   | 0,3   | 0,1   | 0,1   | 0,4   | 0,3   |
| <u>Progressive emphases</u>            |       |       |       |       |       |       |       |
| Environmentalism +                     | 0,4   | 1,1   | 3,0   | 4,7   | 5,9   | 5,6   | 5,8   |
| Democracy                              | 2,8   | 2,2   | 5,9   | 3,0   | 2,9   | 2,5   | 3,2   |
| Anti-growth economy +                  | 0,0   | 0,0   | 0,0   | 0,2   | 0,5   | 1,0   | 2,8   |
| Culture +                              | 1,2   | 2,2   | 1,8   | 2,9   | 2,6   | 3,0   | 2,4   |
| Freedom & human rights                 | 2,2   | 1,5   | 2,0   | 2,1   | 1,6   | 1,2   | 1,8   |
| Non-economic demographic groups        | 4,4   | 5,1   | 4,4   | 5,4   | 4,4   | 3,2   | 1,4   |
| Multiculturalism +                     | 0,4   | 0,5   | 0,5   | 0,5   | 0,6   | 0,9   | 1,1   |
| Minority groups                        | 0,6   | 0,9   | 1,0   | 1,4   | 1,4   | 1,7   | 0,7   |
| Traditional morality -                 | 0,1   | 0,1   | 0,2   | 0,2   | 0,3   | 0,3   | 0,6   |
| National way of life -                 | 0,2   | 0,2   | 0,2   | 0,1   | 0,1   | 0,1   | 0,4   |
| <b>Economic-distributive dimension</b> |       |       |       |       |       |       |       |
| <u>Pro-free-market emphases</u>        |       |       |       |       |       |       |       |
| Incentives                             | 1,7   | 2,3   | 2,0   | 2,4   | 2,9   | 2,2   | 2,1   |
| Economic growth +                      | 3,6   | 4,0   | 2,3   | 2,7   | 2,2   | 2,2   | 1,8   |
| Economic orthodoxy                     | 1,2   | 1,2   | 1,7   | 1,8   | 2,3   | 1,3   | 1,2   |
| Protectionism -                        | 0,3   | 0,4   | 0,1   | 0,1   | 0,3   | 0,4   | 0,3   |
| Free market economy                    | 1,0   | 0,6   | 0,4   | 0,6   | 0,8   | 0,7   | 0,3   |
| Welfare -                              | 0,0   | 0,1   | 0,1   | 0,1   | 0,3   | 0,1   | 0,2   |
| Labour groups -                        | 0,0   | 0,0   | 0,1   | 0,0   | 0,0   | 0,0   | 0,0   |
| Education -                            | 0,0   | 0,3   | 0,0   | 0,0   | 0,0   | 0,0   | 0,0   |
| <u>Pro-redistribution emphases</u>     |       |       |       |       |       |       |       |
| Welfare +                              | 8,2   | 9,6   | 7,2   | 8,3   | 9,3   | 11,6  | 12,8  |
| Equality +                             | 4,7   | 3,9   | 6,3   | 5,7   | 7,1   | 6,4   | 8,8   |
| Education +                            | 3,4   | 4,9   | 3,9   | 3,9   | 5,0   | 7,2   | 6,5   |
| Labour groups +                        | 5,0   | 4,0   | 4,1   | 3,8   | 3,8   | 3,3   | 5,8   |
| Market regulation                      | 2,7   | 2,3   | 2,6   | 1,9   | 2,1   | 2,5   | 4,9   |
| Controlled economy                     | 1,9   | 1,5   | 1,9   | 1,1   | 0,7   | 0,6   | 1,0   |
| Nationalisation                        | 1,3   | 0,8   | 1,1   | 0,8   | 0,5   | 0,5   | 0,8   |
| Keynesian demand management            | 0,4   | 0,4   | 0,3   | 0,5   | 0,3   | 0,2   | 0,6   |
| Economic planning                      | 2,6   | 2,4   | 2,9   | 1,3   | 0,5   | 0,7   | 0,4   |
| Corporatism/mixed economy              | 0,2   | 0,4   | 0,4   | 0,4   | 0,5   | 0,4   | 0,3   |
| Protectionism +                        | 0,5   | 0,4   | 0,6   | 0,3   | 0,2   | 0,1   | 0,3   |
| <b>Other categories</b>                |       |       |       |       |       |       |       |
| Technology & infrastructure            | 4,2   | 5,0   | 4,6   | 5,5   | 6,1   | 6,9   | 6,9   |
| Gov-admin efficiency                   | 1,3   | 1,8   | 2,0   | 3,1   | 4,2   | 3,9   | 2,8   |
| Internationalism +                     | 2,3   | 2,7   | 2,4   | 2,8   | 3,2   | 3,7   | 2,6   |
| Decentralisation                       | 1,0   | 1,7   | 1,7   | 1,8   | 1,9   | 1,8   | 1,5   |
| Europe +                               | 0,4   | 1,0   | 0,7   | 1,2   | 2,0   | 1,7   | 1,3   |

|                               |     |     |     |     |     |     |     |
|-------------------------------|-----|-----|-----|-----|-----|-----|-----|
| Agriculture +                 | 5,9 | 4,9 | 2,8 | 2,8 | 2,0 | 1,4 | 1,2 |
| Military +                    | 1,2 | 1,9 | 0,9 | 0,9 | 0,6 | 1,2 | 1,1 |
| Economic goals                | 3,7 | 2,8 | 4,8 | 3,3 | 2,7 | 1,8 | 1,1 |
| Political corruption          | 0,5 | 0,3 | 0,4 | 0,5 | 0,6 | 0,4 | 0,8 |
| Military -                    | 1,6 | 1,5 | 0,8 | 1,4 | 0,6 | 0,6 | 0,5 |
| Peace                         | 2,1 | 1,7 | 1,2 | 2,2 | 0,5 | 0,7 | 0,4 |
| Europe -                      | 0,0 | 0,2 | 0,4 | 0,2 | 0,3 | 0,2 | 0,3 |
| Foreign special +             | 1,7 | 1,3 | 0,9 | 1,0 | 0,4 | 0,6 | 0,3 |
| Constitution -                | 0,7 | 0,6 | 0,2 | 0,3 | 0,0 | 0,0 | 0,3 |
| Middle class and prof. groups | 1,5 | 1,1 | 0,7 | 0,7 | 0,2 | 0,5 | 0,2 |
| Constitution +                | 1,0 | 0,5 | 0,6 | 0,7 | 0,4 | 0,4 | 0,2 |
| Internationalism -            | 0,5 | 0,4 | 0,4 | 0,1 | 0,1 | 0,2 | 0,1 |
| Anti-imperialism              | 0,4 | 0,4 | 0,6 | 0,3 | 0,1 | 0,1 | 0,1 |
| Marxist analysis +            | 0,1 | 0,0 | 0,2 | 0,1 | 0,1 | 0,1 | 0,1 |
| Centralisation                | 0,2 | 0,5 | 0,5 | 0,1 | 0,1 | 0,2 | 0,1 |
| Foreign special -             | 0,7 | 0,5 | 0,4 | 0,3 | 0,0 | 0,1 | 0,0 |

**Note:** The table reports the scores of social democratic, socialist, and other left-wing parties (excluding Greens) on all the items available in the Comparative Manifesto Project database. Values correspond to the share of "quasi-sentences" dedicated to emphasizing each category of issues in parties' manifestos. Vote-share-weighted average over all parties with available data in the corresponding decade. Figure are ranked in decreasing order of their magnitude in the 2010s.



**Table B7 - Manifesto scores of Conservative / Christian Democratic / Liberal parties**

|                                        | 1950s | 1960s | 1970s | 1980s | 1990s | 2000s | 2010s |
|----------------------------------------|-------|-------|-------|-------|-------|-------|-------|
| <b>Sociocultural dimension</b>         |       |       |       |       |       |       |       |
| <u>Conservative emphases</u>           |       |       |       |       |       |       |       |
| Law and order +                        | 0,7   | 0,9   | 1,9   | 2,4   | 4,7   | 6,4   | 5,2   |
| Political authority                    | 4,4   | 3,2   | 3,4   | 3,4   | 5,4   | 6,0   | 2,9   |
| National way of life +                 | 2,0   | 1,0   | 0,8   | 0,9   | 1,4   | 2,3   | 2,4   |
| Civic mindedness +                     | 3,1   | 1,4   | 1,5   | 1,5   | 1,7   | 1,8   | 1,7   |
| Traditional morality +                 | 3,1   | 1,6   | 1,8   | 2,3   | 3,1   | 2,5   | 1,4   |
| Multiculturalism -                     | 0,2   | 0,3   | 0,2   | 0,1   | 0,4   | 1,0   | 1,0   |
| <u>Progressive emphases</u>            |       |       |       |       |       |       |       |
| Environmentalism +                     | 0,4   | 1,5   | 3,8   | 4,5   | 5,1   | 4,2   | 4,3   |
| Freedom & human rights                 | 3,3   | 2,0   | 3,0   | 3,0   | 2,3   | 2,2   | 2,4   |
| Culture +                              | 1,0   | 2,2   | 2,8   | 2,5   | 2,0   | 2,0   | 2,1   |
| Democracy                              | 2,8   | 2,4   | 3,8   | 2,1   | 2,3   | 2,0   | 2,0   |
| Anti-growth economy +                  | 0,0   | 0,0   | 0,0   | 0,1   | 0,3   | 0,5   | 1,9   |
| Non-economic demographic groups        | 3,9   | 4,9   | 4,9   | 4,0   | 3,4   | 2,9   | 1,3   |
| Multiculturalism +                     | 1,2   | 0,8   | 0,6   | 0,7   | 0,5   | 0,7   | 0,8   |
| Minority groups                        | 0,5   | 0,7   | 1,1   | 1,1   | 1,1   | 1,3   | 0,5   |
| National way of life -                 | 0,1   | 0,1   | 0,0   | 0,0   | 0,0   | 0,0   | 0,5   |
| Traditional morality -                 | 0,1   | 0,0   | 0,1   | 0,1   | 0,1   | 0,2   | 0,3   |
| <b>Economic-distributive dimension</b> |       |       |       |       |       |       |       |
| <u>Pro-free-market emphases</u>        |       |       |       |       |       |       |       |
| Incentives                             | 3,0   | 3,7   | 3,9   | 3,9   | 4,1   | 3,9   | 3,7   |
| Economic growth +                      | 3,1   | 3,9   | 2,3   | 3,0   | 2,2   | 2,4   | 3,0   |
| Economic orthodoxy                     | 5,0   | 3,9   | 4,3   | 5,4   | 4,4   | 2,5   | 2,9   |
| Free market economy                    | 5,0   | 3,8   | 3,1   | 4,4   | 3,5   | 2,8   | 2,7   |
| Welfare -                              | 0,4   | 0,3   | 0,6   | 0,8   | 1,1   | 0,8   | 1,5   |
| Protectionism -                        | 0,4   | 0,5   | 0,2   | 0,6   | 0,3   | 0,4   | 0,6   |
| Labour groups -                        | 0,4   | 0,2   | 0,5   | 0,5   | 0,3   | 0,1   | 0,4   |
| Education -                            | 0,0   | 0,0   | 0,2   | 0,0   | 0,1   | 0,1   | 0,2   |
| <u>Pro-redistribution emphases</u>     |       |       |       |       |       |       |       |
| Welfare +                              | 4,9   | 6,0   | 6,6   | 5,6   | 6,1   | 8,5   | 9,0   |
| Education +                            | 2,2   | 4,6   | 4,0   | 3,4   | 4,8   | 5,7   | 5,4   |
| Equality +                             | 3,1   | 3,1   | 3,9   | 2,9   | 3,5   | 3,1   | 4,4   |
| Labour groups +                        | 2,4   | 2,0   | 1,9   | 1,7   | 1,2   | 2,0   | 3,0   |
| Market regulation                      | 1,4   | 1,0   | 1,5   | 1,4   | 2,0   | 2,0   | 3,0   |
| Economic planning                      | 0,9   | 1,5   | 1,1   | 0,4   | 0,3   | 0,4   | 0,5   |
| Protectionism +                        | 0,5   | 0,5   | 0,5   | 0,2   | 0,2   | 0,2   | 0,3   |
| Controlled economy                     | 0,3   | 0,4   | 0,9   | 0,4   | 0,4   | 0,3   | 0,3   |
| Corporatism/mixed economy              | 0,6   | 0,2   | 0,3   | 0,3   | 0,3   | 0,1   | 0,3   |
| Keynesian demand management            | 0,3   | 0,3   | 0,6   | 0,3   | 0,1   | 0,1   | 0,2   |
| Nationalisation                        | 0,2   | 0,0   | 0,1   | 0,0   | 0,0   | 0,1   | 0,2   |
| <b>Other categories</b>                |       |       |       |       |       |       |       |
| Technology & infrastructure            | 3,2   | 5,8   | 4,2   | 5,5   | 5,2   | 6,3   | 7,6   |
| Gov-admin efficiency                   | 1,6   | 2,5   | 2,7   | 4,8   | 5,2   | 5,8   | 4,7   |
| Internationalism +                     | 1,6   | 2,6   | 1,8   | 2,2   | 3,0   | 2,4   | 2,3   |
| Military +                             | 2,1   | 2,6   | 1,7   | 2,6   | 1,4   | 1,7   | 2,1   |
| Agriculture +                          | 5,3   | 4,5   | 3,4   | 4,2   | 2,7   | 1,9   | 2,0   |

|                               |     |     |     |     |     |     |     |
|-------------------------------|-----|-----|-----|-----|-----|-----|-----|
| Decentralisation              | 2,0 | 2,2 | 3,2 | 2,1 | 1,9 | 1,9 | 1,8 |
| Europe +                      | 0,6 | 1,4 | 1,3 | 1,8 | 2,7 | 1,7 | 1,6 |
| Economic goals                | 2,4 | 2,2 | 3,6 | 3,2 | 2,5 | 2,5 | 1,2 |
| Europe -                      | 0,1 | 0,1 | 0,0 | 0,1 | 0,5 | 0,4 | 0,6 |
| Political corruption          | 0,4 | 0,3 | 0,4 | 0,3 | 0,6 | 0,6 | 0,5 |
| Middle class and prof. groups | 2,3 | 1,4 | 1,1 | 0,7 | 0,4 | 0,6 | 0,4 |
| Constitution +                | 1,1 | 0,9 | 0,7 | 0,5 | 0,4 | 0,3 | 0,4 |
| Centralisation                | 0,3 | 0,3 | 0,3 | 0,2 | 0,1 | 0,2 | 0,3 |
| Foreign special +             | 2,1 | 1,8 | 0,9 | 1,1 | 0,6 | 0,7 | 0,3 |
| Internationalism -            | 0,4 | 0,8 | 0,4 | 0,2 | 0,2 | 0,2 | 0,2 |
| Constitution -                | 0,4 | 0,3 | 0,2 | 0,2 | 0,1 | 0,0 | 0,2 |
| Peace                         | 0,9 | 1,2 | 0,7 | 0,9 | 0,4 | 0,3 | 0,2 |
| Military -                    | 0,3 | 0,3 | 0,2 | 0,5 | 0,2 | 0,1 | 0,1 |
| Foreign special -             | 0,4 | 0,3 | 0,1 | 0,3 | 0,0 | 0,1 | 0,0 |
| Anti-imperialism              | 0,4 | 0,5 | 0,2 | 0,2 | 0,0 | 0,0 | 0,0 |
| Marxist analysis +            | 0,0 | 0,0 | 0,0 | 0,0 | 0,0 | 0,0 | 0,0 |

**Note:** The table reports the scores of conservative, Christian democratic, and liberal parties on all the items available in the Comparative Manifesto Project database. Values correspond to the share of "quasi-sentences" dedicated to emphasizing each category of issues in parties' manifestos. Vote-share-weighted average over all parties with available data in the corresponding decade. Figure are ranked in decreasing order of their magnitude in the 2010s.

**Table B8 - Sociocultural polarization and educational divides: regression results**

|           | Raw coefficient | After controls and country/year fixed effects | After controls and election fixed effects |
|-----------|-----------------|-----------------------------------------------|-------------------------------------------|
| 1948-1979 | -0.13*          | 0.12                                          | 0.11                                      |
| 1980-1999 | -0.68***        | -0.13                                         | -0.21                                     |
| 2000-2020 | -1.21***        | -0.65***                                      | -0.73***                                  |

**Source:** authors' computations combining the World Political Cleavages and Inequality Datatabase with Manifesto Project data.

**Note:** the table reports the coefficient associated to a regression of the sociocultural index on the education gradient (the share of top 10% educated voters within a given party's electorate) at the party level, decomposing the dataset into three time periods: 1948-1979, 1980-1999, and 2000-2020. The first column reports the raw coefficient (without controls). The second column reports the coefficient after controlling for country and year fixed effects and for the composition of the electorate of each party in terms of income, age, gender, rural-urban location, and religion. The third column reports the same coefficient after controlling for the same variables and for election fixed effects (that is, interacting country and year fixed effects). \*  $p < 0.10$ , \*\*  $p < 0.05$ , \*\*\*  $p < 0.01$ .

**Interpretation:** in 1948-1979, the link between a party's position on the sociocultural axis and the composition of its electorate in terms of education was small and not statistically significant; in 2000-2020, it has become strongly negative and statistically significant at the 1% level, so that parties strongly emphasizing progressive issues in their manifestos receive much greater support from higher-educated voters.

**Table B9 - Sociocultural polarization and educational divides: complete regression results**

|                                                        | Raw coefficient    |                      |                      | After controls and country/year fixed effects |                   |                      | After controls and election fixed effects |                   |                      |
|--------------------------------------------------------|--------------------|----------------------|----------------------|-----------------------------------------------|-------------------|----------------------|-------------------------------------------|-------------------|----------------------|
|                                                        | 1948-1979          | 1980-1999            | 2000-2020            | 1948-1979                                     | 1980-1999         | 2000-2020            | 1948-1979                                 | 1980-1999         | 2000-2020            |
| Share of top 10% educated voters in party's electorate | -0.134*<br>(0.079) | -0.681***<br>(0.103) | -1.208***<br>(0.118) | 0.122<br>(0.174)                              | -0.133<br>(0.200) | -0.651***<br>(0.205) | 0.114<br>(0.176)                          | -0.208<br>(0.193) | -0.733***<br>(0.207) |
| R-squared                                              | 0.01               | 0.06                 | 0.14                 | 0.59                                          | 0.52              | 0.43                 | 0.61                                      | 0.59              | 0.47                 |
| Observations                                           | 444                | 661                  | 640                  | 159                                           | 266               | 341                  | 159                                       | 266               | 341                  |

**Source:** authors' computations combining the World Political Cleavages and Inequality Database with Manifesto Project data.

**Note:** the table reports the results of a regression of the sociocultural index on the education gradient (the share of top 10% educated voters within a given party's electorate) at the party level, decomposing the dataset into three time periods: 1948-1979, 1980-1999, and 2000-2020. The first panel reports the raw coefficient (without controls). The second panel reports the coefficient after controlling for country and year fixed effects and for the composition of the electorate of each party in terms of income, age, gender, rural-urban location, and religion. The third panel reports the same coefficient after controlling for the same variables and for election fixed effects (that is, interacting country and year fixed effects). \* p<0.10, \*\* p<0.05, \*\*\* p<0.01.

**Interpretation:** in 1948-1979, the link between a party's position on the sociocultural axis and the composition of its electorate in terms of education was small and not statistically significant; in 2000-2020, it has become strongly negative and statistically significant at the 1% level, so that parties strongly emphasizing progressive issues in their manifestos receive much greater support from higher-educated voters.

**Table B10 - Correlation between income and education gradients and all Manifesto items, 1960s-2010s**

|                                        | Relative support among top 10% educated voters |        |         |          |          |          | Relative support among top 10% income voters |          |          |          |          |         |
|----------------------------------------|------------------------------------------------|--------|---------|----------|----------|----------|----------------------------------------------|----------|----------|----------|----------|---------|
|                                        | 1960s                                          | 1970s  | 1980s   | 1990s    | 2000s    | 2010s    | 1960s                                        | 1970s    | 1980s    | 1990s    | 2000s    | 2010s   |
| <b>Sociocultural dimension</b>         |                                                |        |         |          |          |          |                                              |          |          |          |          |         |
| <u>Conservative emphases</u>           |                                                |        |         |          |          |          |                                              |          |          |          |          |         |
| Law and order +                        | 0.11                                           | 0.11*  | -0.08   | -0.09*   | -0.07    | -0.27*** | -0.03                                        | 0.12*    | 0.13**   | 0.25***  | 0.14**   | -0.07   |
| National way of life +                 | -0.05                                          | -0.11* | -0.05   | -0.24*** | -0.20*** | -0.28*** | -0.07                                        | 0.04     | 0.06     | -0.15**  | -0.10*   | -0.09*  |
| Multiculturalism -                     | -0.09                                          | -0.03  | -0.12** | -0.14*** | -0.19*** | -0.30*** | -0.13                                        | -0.01    | -0.07    | -0.07    | -0.08    | -0.09*  |
| Traditional morality +                 | -0.02                                          | -0.04  | -0.04   | -0.14**  | -0.18*** | -0.11**  | -0.06                                        | -0.02    | -0.07    | -0.10    | -0.19*** | -0.11** |
| Political authority                    | -0.05                                          | -0.09  | 0.02    | 0.04     | -0.04    | -0.08    | -0.08                                        | -0.01    | -0.09    | 0.06     | 0.07     | 0.03    |
| Civic mindedness +                     | 0.02                                           | -0.07  | -0.11** | -0.04    | 0.01     | 0.02     | -0.08                                        | 0.05     | -0.07    | -0.02    | -0.07    | 0.07    |
| <u>Progressive emphases</u>            |                                                |        |         |          |          |          |                                              |          |          |          |          |         |
| Culture +                              | -0.11                                          | -0.09  | -0.11** | 0.02     | -0.03    | 0.15***  | -0.06                                        | -0.04    | -0.09    | -0.08    | 0.04     | 0.10*   |
| Freedom & human rights                 | 0.09                                           | 0.11*  | 0.11**  | 0.13**   | 0.16***  | 0.23***  | 0.14                                         | 0.17***  | 0.24***  | 0.19***  | 0.12**   | 0.17*** |
| Anti-growth economy +                  | -0.08                                          | -0.00  | 0.13**  | 0.23***  | 0.22***  | 0.23***  | -0.07                                        | 0.02     | 0.02     | -0.00    | 0.06     | -0.06   |
| Environmentalism +                     | 0.02                                           | 0.15** | 0.28*** | 0.23***  | 0.20***  | 0.27***  | -0.10                                        | 0.01     | -0.02    | -0.12*   | -0.05    | -0.02   |
| Traditional morality -                 | 0.07                                           | 0.06   | 0.09    | 0.13**   | 0.21***  | 0.27***  | 0.00                                         | 0.16**   | 0.02     | 0.02     | 0.04     | 0.14**  |
| Multiculturalism +                     | -0.06                                          | 0.01   | 0.07    | 0.13**   | 0.13**   | 0.11**   | -0.09                                        | 0.12*    | 0.01     | -0.02    | 0.01     | 0.03    |
| National way of life -                 | -0.10                                          | -0.07  | 0.01    | 0.01     | 0.01     | 0.11**   | -0.13                                        | -0.08    | -0.03    | -0.07    | -0.12**  | 0.02    |
| Non-economic demographic groups        | -0.09                                          | -0.07  | 0.01    | 0.04     | 0.01     | -0.06    | -0.15*                                       | -0.11    | -0.06    | -0.06    | -0.01    | -0.05   |
| Minority groups                        | 0.06                                           | 0.01   | 0.03    | 0.18***  | 0.16***  | 0.02     | 0.01                                         | -0.11*   | -0.02    | 0.05     | 0.08     | -0.04   |
| Democracy                              | -0.03                                          | 0.10   | 0.06    | 0.16***  | 0.08     | 0.05     | -0.08                                        | 0.02     | -0.15**  | -0.06    | -0.10*   | -0.08   |
| <b>Economic-distributive dimension</b> |                                                |        |         |          |          |          |                                              |          |          |          |          |         |
| <u>Pro-free-market emphases</u>        |                                                |        |         |          |          |          |                                              |          |          |          |          |         |
| Incentives                             | -0.05                                          | 0.05   | -0.11** | -0.11**  | -0.08    | -0.18*** | -0.10                                        | 0.17***  | 0.24***  | 0.12*    | 0.17***  | 0.08    |
| Economic growth +                      | 0.01                                           | -0.12* | -0.08   | -0.04    | -0.13**  | -0.09*   | -0.12                                        | -0.09    | 0.10     | 0.09     | -0.00    | 0.16*** |
| Economic orthodoxy                     | 0.38***                                        | -0.01  | -0.06   | -0.06    | 0.01     | -0.10*   | 0.42***                                      | 0.22***  | 0.30***  | 0.19***  | 0.14**   | 0.09*   |
| Labour groups -                        | 0.08                                           | 0.03   | -0.01   | -0.07    | -0.08    | -0.00    | 0.09                                         | 0.10     | 0.12*    | 0.05     | 0.08     | 0.13**  |
| Education -                            | 0.01                                           | 0.08   | -0.09   | -0.07    | -0.00    | -0.01    | -0.07                                        | 0.08     | 0.05     | 0.03     | 0.04     | 0.11**  |
| Protectionism -                        | 0.15*                                          | 0.04   | -0.02   | 0.00     | 0.00     | -0.03    | -0.10                                        | 0.08     | 0.05     | 0.06     | 0.08     | 0.20*** |
| Welfare -                              | 0.19**                                         | -0.05  | -0.11*  | -0.04    | -0.02    | -0.05    | 0.39***                                      | 0.06     | 0.08     | 0.09     | 0.15***  | 0.15*** |
| Free market economy                    | 0.30***                                        | 0.05   | -0.04   | 0.01     | -0.09*   | -0.07    | 0.25***                                      | 0.25***  | 0.32***  | 0.28***  | 0.20***  | 0.30*** |
| <u>Pro-redistribution emphases</u>     |                                                |        |         |          |          |          |                                              |          |          |          |          |         |
| Equality +                             | -0.02                                          | -0.12* | -0.04   | 0.07     | 0.12**   | 0.21***  | -0.05                                        | -0.16**  | -0.29*** | -0.18*** | -0.17*** | -0.05   |
| Keynesian demand management            | 0.02                                           | -0.10  | -0.01   | -0.04    | -0.03    | -0.11**  | -0.11                                        | -0.04    | 0.04     | -0.01    | -0.10*   | -0.07   |
| Labour groups +                        | -0.16*                                         | 0.15** | 0.01    | 0.06     | 0.09     | 0.13**   | -0.11                                        | -0.19*** | -0.25*** | -0.13**  | -0.12**  | -0.06   |

|                               |         |          |          |          |          |          |         |          |          |          |          |          |
|-------------------------------|---------|----------|----------|----------|----------|----------|---------|----------|----------|----------|----------|----------|
| Protectionism +               | -0.17*  | -0.09    | -0.03    | -0.18*** | -0.10*   | -0.10*   | -0.17*  | -0.14**  | -0.07    | -0.10*   | -0.11*   | -0.18*** |
| Education +                   | -0.01   | -0.06    | -0.12**  | 0.01     | 0.03     | 0.11*    | 0.01    | -0.01    | -0.01    | 0.13**   | -0.01    | 0.03     |
| Welfare +                     | -0.22** | -0.09    | -0.10*   | -0.15*** | 0.00     | -0.05    | -0.22** | -0.06    | -0.20*** | -0.24*** | -0.11*   | -0.16*** |
| Economic planning             | -0.15*  | -0.17*** | -0.13**  | -0.01    | -0.09    | -0.06    | -0.19** | -0.05    | -0.15**  | -0.09    | -0.08    | 0.02     |
| Corporatism/mixed economy     | -0.00   | 0.09     | -0.11*   | -0.05    | -0.11*   | -0.08    | -0.03   | 0.06     | -0.02    | 0.01     | -0.11*   | -0.08    |
| Controlled economy            | -0.15*  | -0.14**  | -0.00    | -0.07    | 0.04     | 0.00     | -0.05   | -0.11*   | -0.22*** | -0.11*   | -0.01    | -0.18*** |
| Market regulation             | -0.11   | -0.00    | 0.01     | 0.01     | 0.08     | 0.01     | -0.19** | -0.12*   | -0.02    | -0.02    | 0.02     | -0.09    |
| Nationalisation               | -0.05   | 0.08     | 0.06     | -0.09    | -0.03    | 0.01     | -0.03   | -0.21*** | -0.26*** | -0.16*** | -0.23*** | -0.22*** |
| <b>Other categories</b>       |         |          |          |          |          |          |         |          |          |          |          |          |
| Agriculture +                 | -0.06   | -0.14**  | -0.15*** | -0.11**  | -0.20*** | -0.17*** | -0.02   | -0.03    | 0.01     | -0.06    | 0.01     | -0.04    |
| Military +                    | 0.11    | 0.02     | -0.00    | -0.10*   | -0.10*   | -0.18*** | 0.06    | 0.21***  | 0.20***  | 0.15**   | 0.12**   | 0.05     |
| Europe -                      | 0.00    | 0.05     | 0.05     | 0.01     | -0.07    | -0.27*** | 0.02    | -0.04    | -0.11*   | -0.15**  | -0.18*** | -0.16*** |
| Political corruption          | 0.02    | 0.04     | 0.05     | -0.05    | -0.05    | 0.18***  | -0.01   | 0.06     | -0.03    | 0.02     | -0.02    | 0.08     |
| Europe +                      | 0.04    | -0.01    | -0.05    | 0.04     | 0.11**   | 0.19***  | 0.03    | 0.06     | 0.10*    | 0.17***  | 0.22***  | 0.23***  |
| Military -                    | -0.11   | 0.13**   | 0.21***  | 0.26***  | 0.25***  | 0.20***  | -0.05   | -0.17*** | -0.15**  | -0.10*   | -0.13**  | -0.17*** |
| Internationalism -            | -0.07   | 0.00     | -0.13**  | -0.11**  | -0.17*** | -0.13**  | -0.07   | -0.03    | -0.02    | -0.18*** | -0.17*** | -0.10*   |
| Internationalism +            | 0.04    | 0.10     | 0.13**   | 0.09     | 0.28***  | 0.12**   | -0.12   | 0.08     | -0.04    | -0.03    | -0.01    | 0.03     |
| Centralisation                | -0.09   | -0.07    | -0.04    | -0.03    | 0.05     | 0.10*    | -0.14   | -0.12*   | 0.05     | -0.01    | 0.05     | 0.09     |
| Constitution +                | 0.08    | -0.05    | 0.05     | -0.02    | -0.00    | -0.00    | 0.16*   | 0.03     | 0.02     | 0.02     | 0.05     | 0.09     |
| Gov-admin efficiency          | 0.18**  | -0.03    | -0.02    | -0.08    | -0.01    | -0.04    | 0.17*   | 0.10     | 0.22***  | 0.16***  | 0.19***  | 0.16***  |
| Constitution -                | -0.04   | 0.10     | 0.02     | -0.06    | -0.06    | -0.04    | -0.08   | -0.04    | 0.10*    | -0.04    | -0.04    | 0.00     |
| Decentralisation              | -0.06   | -0.11*   | -0.06    | -0.04    | -0.08    | -0.06    | -0.17*  | -0.06    | -0.04    | 0.03     | 0.02     | -0.00    |
| Middle class and prof. groups | -0.03   | 0.01     | 0.10*    | -0.08    | 0.03     | -0.06    | -0.02   | 0.03     | 0.10*    | 0.07     | 0.04     | 0.06     |
| Technology & infrastructure   | -0.04   | -0.10    | -0.12**  | -0.12**  | -0.14**  | -0.08    | -0.09   | -0.11*   | -0.01    | -0.04    | 0.05     | 0.04     |
| Foreign special +             | 0.13    | -0.03    | -0.05    | -0.03    | 0.12**   | -0.08    | 0.08    | 0.02     | -0.03    | 0.06     | 0.12**   | 0.00     |
| Economic goals                | 0.06    | -0.09    | -0.06    | 0.03     | -0.09    | -0.09    | 0.05    | -0.06    | 0.01     | -0.02    | 0.09     | 0.00     |
| Foreign special -             | -0.13   | -0.08    | 0.11*    | -0.03    | 0.20***  | 0.03     | 0.08    | -0.06    | -0.06    | 0.02     | 0.09     | 0.05     |
| Anti-imperialism              | 0.04    | -0.03    | 0.05     | 0.05     | 0.05     | 0.06     | -0.03   | -0.09    | -0.03    | -0.17*** | -0.08    | -0.14**  |
| Marxist analysis +            | .       | -0.07    | 0.01     | 0.13**   | -0.03    | 0.07     | .       | -0.07    | -0.12**  | -0.13**  | -0.04    | -0.12**  |
| Peace                         | -0.22** | -0.12*   | 0.14***  | 0.13**   | 0.17***  | 0.07     | -0.13   | -0.18*** | -0.21*** | -0.01    | 0.02     | -0.05    |

**Note:** The table reports the correlation coefficient between all items available in the Comparative Manifesto Project database and (1) the education gradient (defined as the share of top 10% educated voters within the electorate of the corresponding party) and (2) the income gradient (defined as the share of top 10% income voters within the electorate of the corresponding party). The unit of observation is the political party. Manifesto items correspond to the share of "quasi-sentences" dedicated to emphasizing each category of issues in parties' manifestos. \* p<0.10, \*\* p<0.05, \*\*\* p<0.01.

**Figure B1 - Share of votes covered by the survey-manifesto dataset**

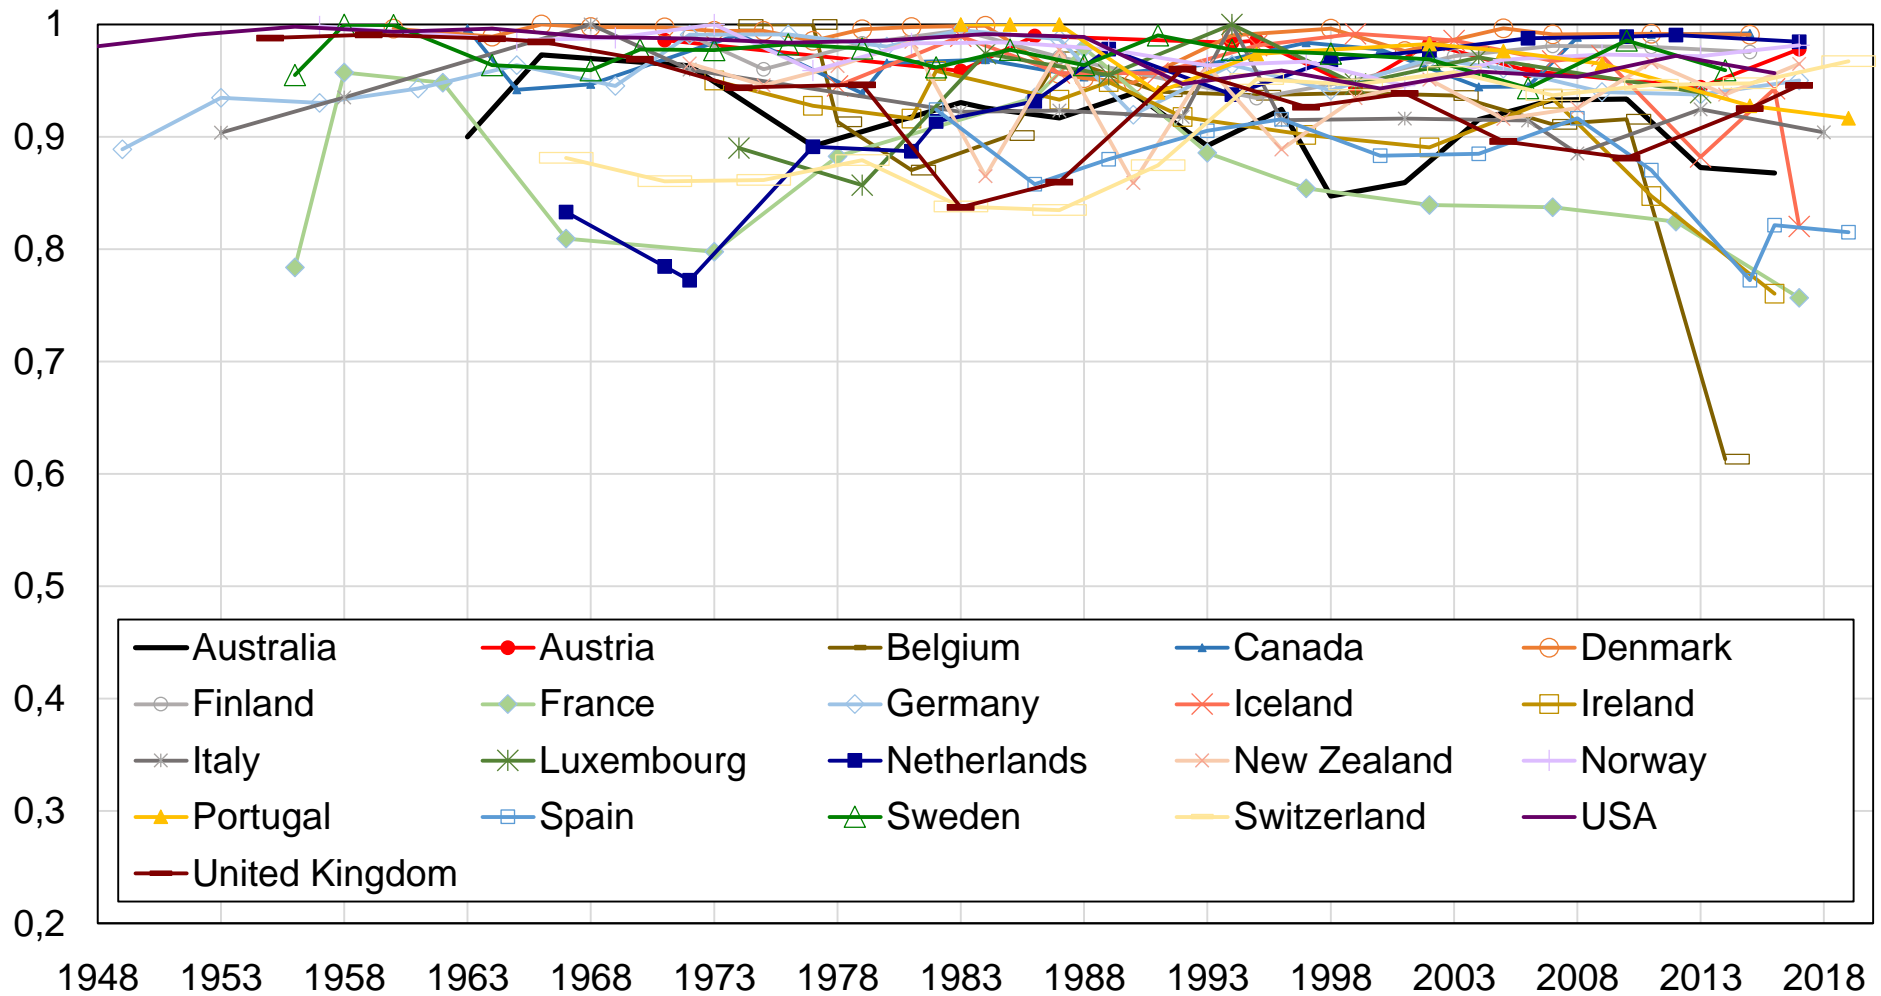

**Source:** authors' computations combining the World Political Cleavages and Inequality Database and Manifesto Project data.

**Note:** the figure represents the total share of votes captured by the merged survey-manifesto dataset by country for all elections available between 1945 and 2020.

**Figure B2 - Ideological polarization in Western democracies, 1950s**

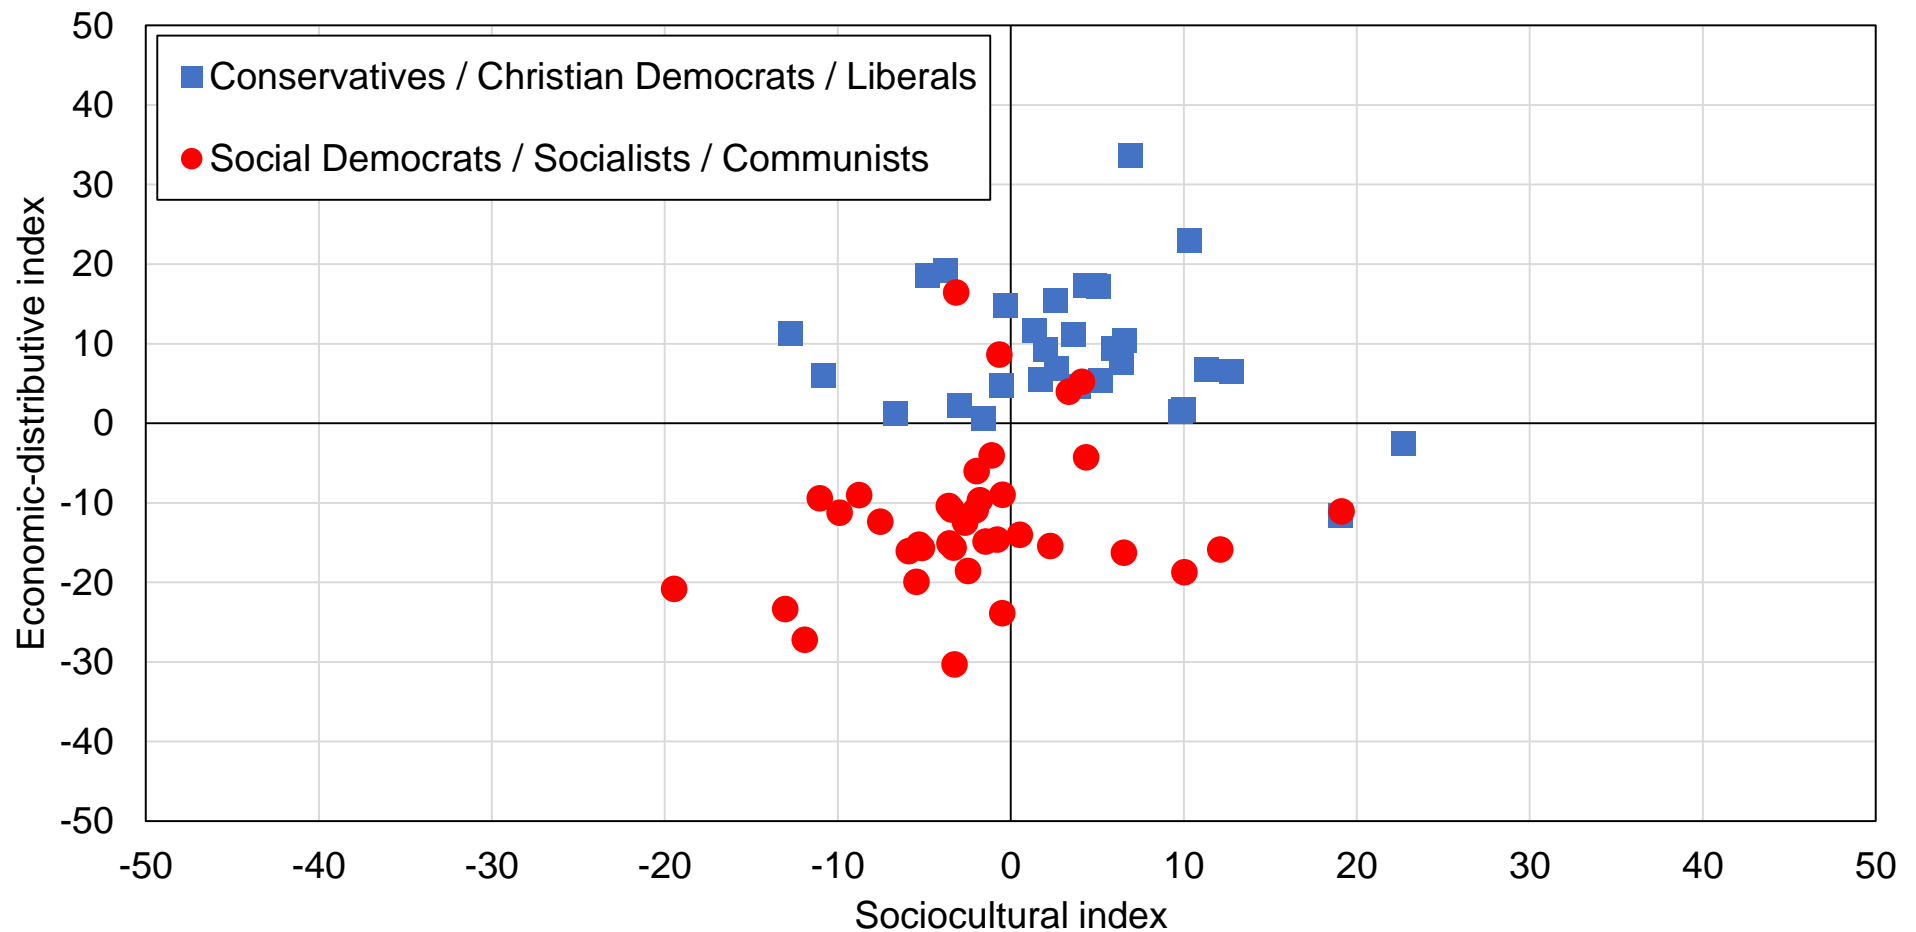

**Source:** authors' computations using the Comparative Manifesto Project database.

**Note:** the figure displays the average score of all parties available in the CMP dataset in the 1950s on the economic-distributive index (y-axis) and the sociocultural index (x-axis). Parties are categorized into conservative, Christian democratic, and liberal parties; social democratic, socialist, communist, and other left-wing parties, anti-immigration parties; and green parties.



**Figure B3 - Ideological polarization in Western democracies, 1960s**

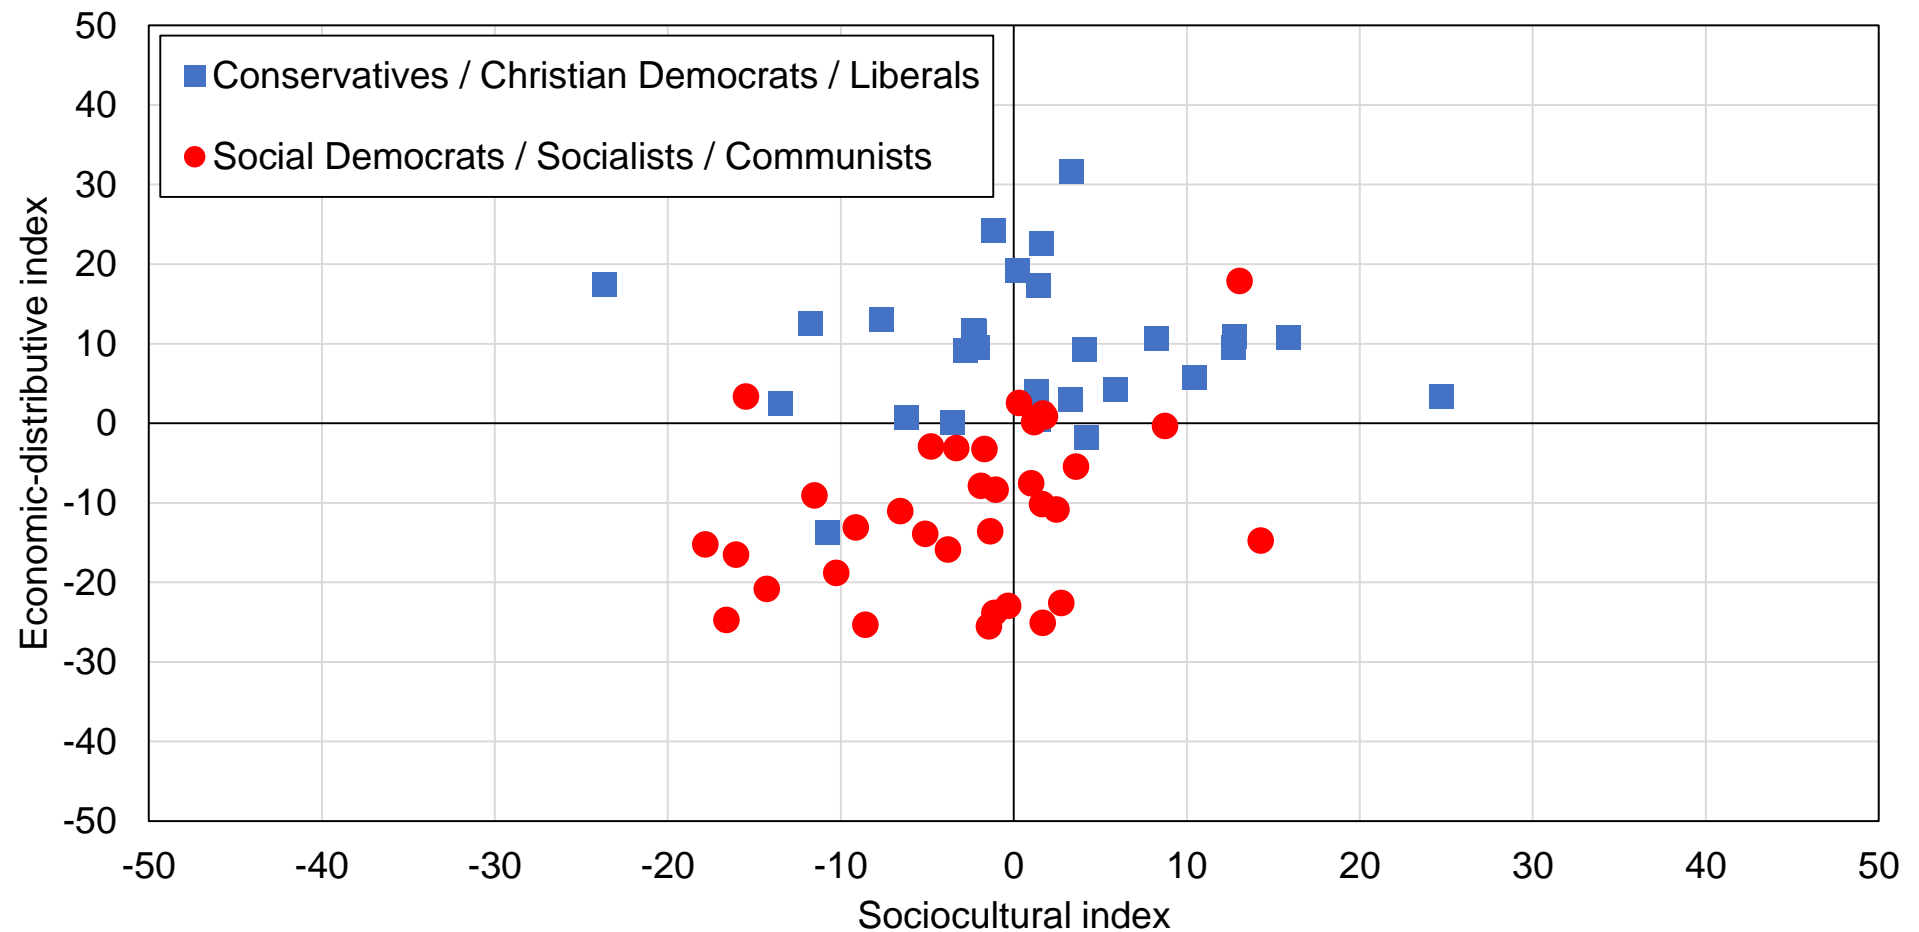

**Source:** authors' computations using the Comparative Manifesto Project database.

**Note:** the figure displays the average score of all parties available in the CMP dataset in the 1960s on the economic-distributive index (y-axis) and the sociocultural index (x-axis). Parties are categorized into conservative, Christian democratic, and liberal parties; social democratic, socialist, communist, and other left-wing parties, anti-immigration parties; and green parties.

**Figure B4 - Ideological polarization in Western democracies, 1970s**

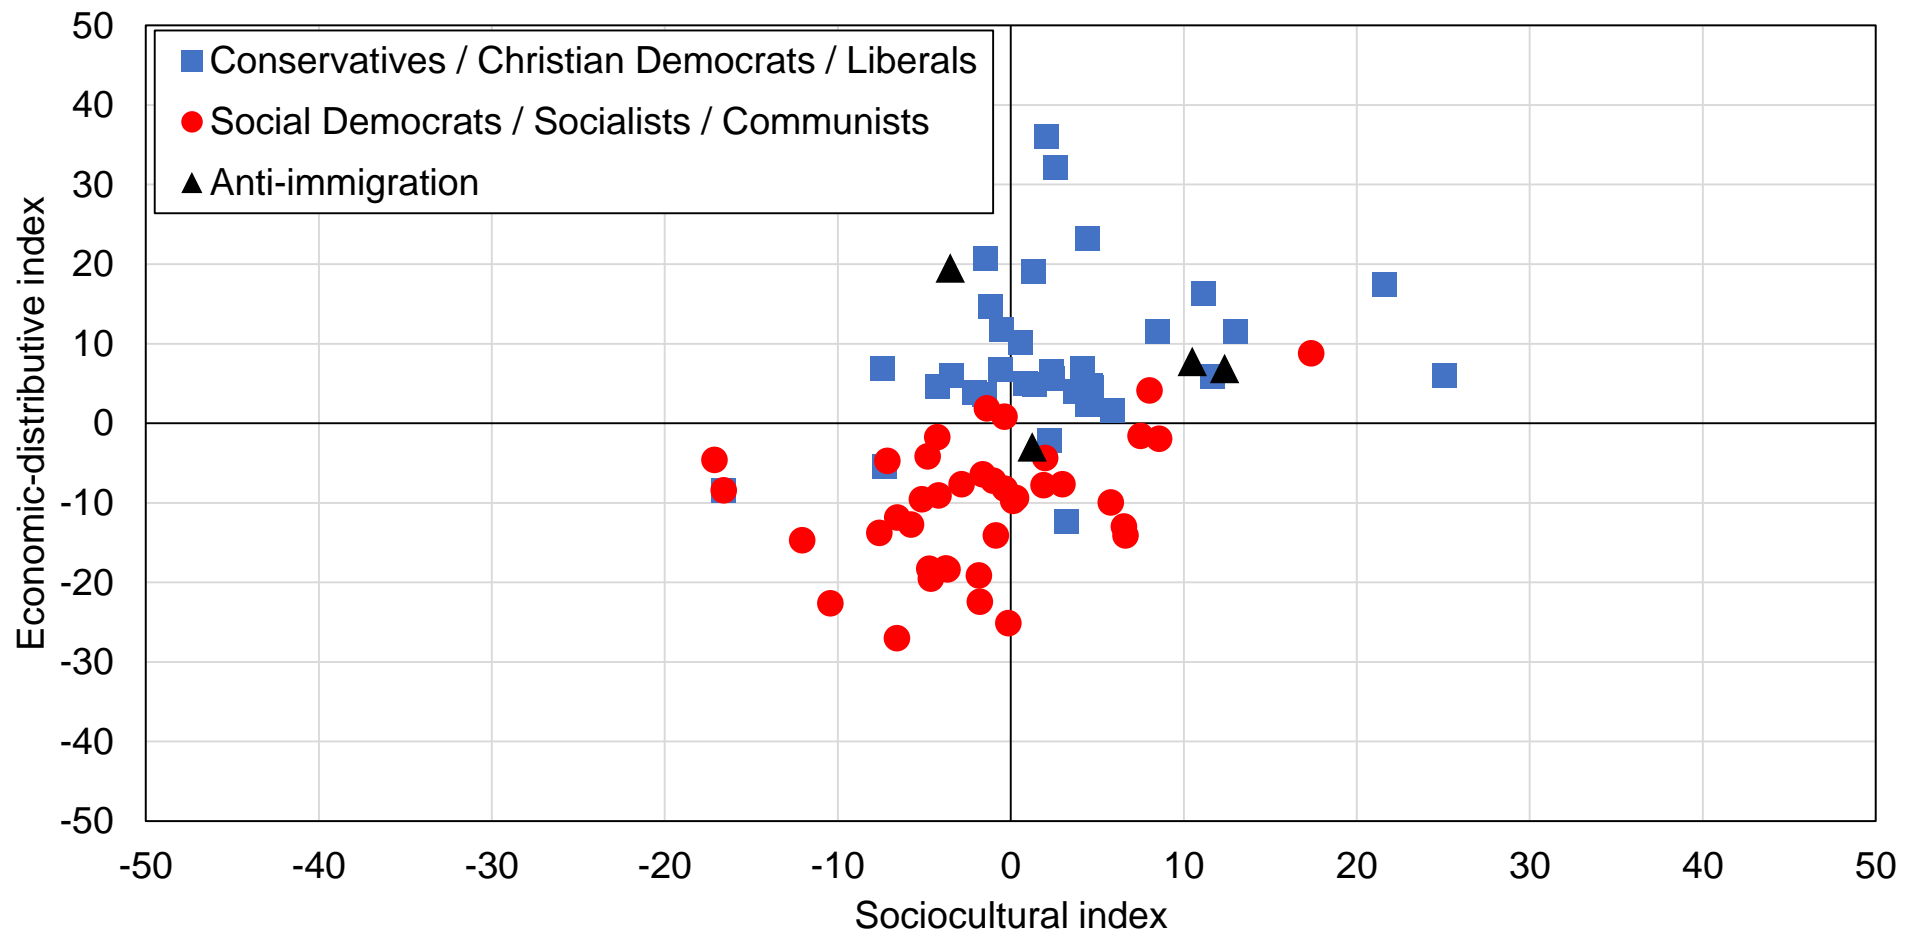

**Source:** authors' computations using the Comparative Manifesto Project database.

**Note:** the figure displays the average score of all parties available in the CMP dataset in the 1970s on the economic-distributive index (y-axis) and the sociocultural index (x-axis). Parties are categorized into conservative, Christian democratic, and liberal parties; social democratic, socialist, communist, and other left-wing parties, anti-immigration parties; and green parties.

**Figure B5 - Ideological polarization in Western democracies, 1980s**

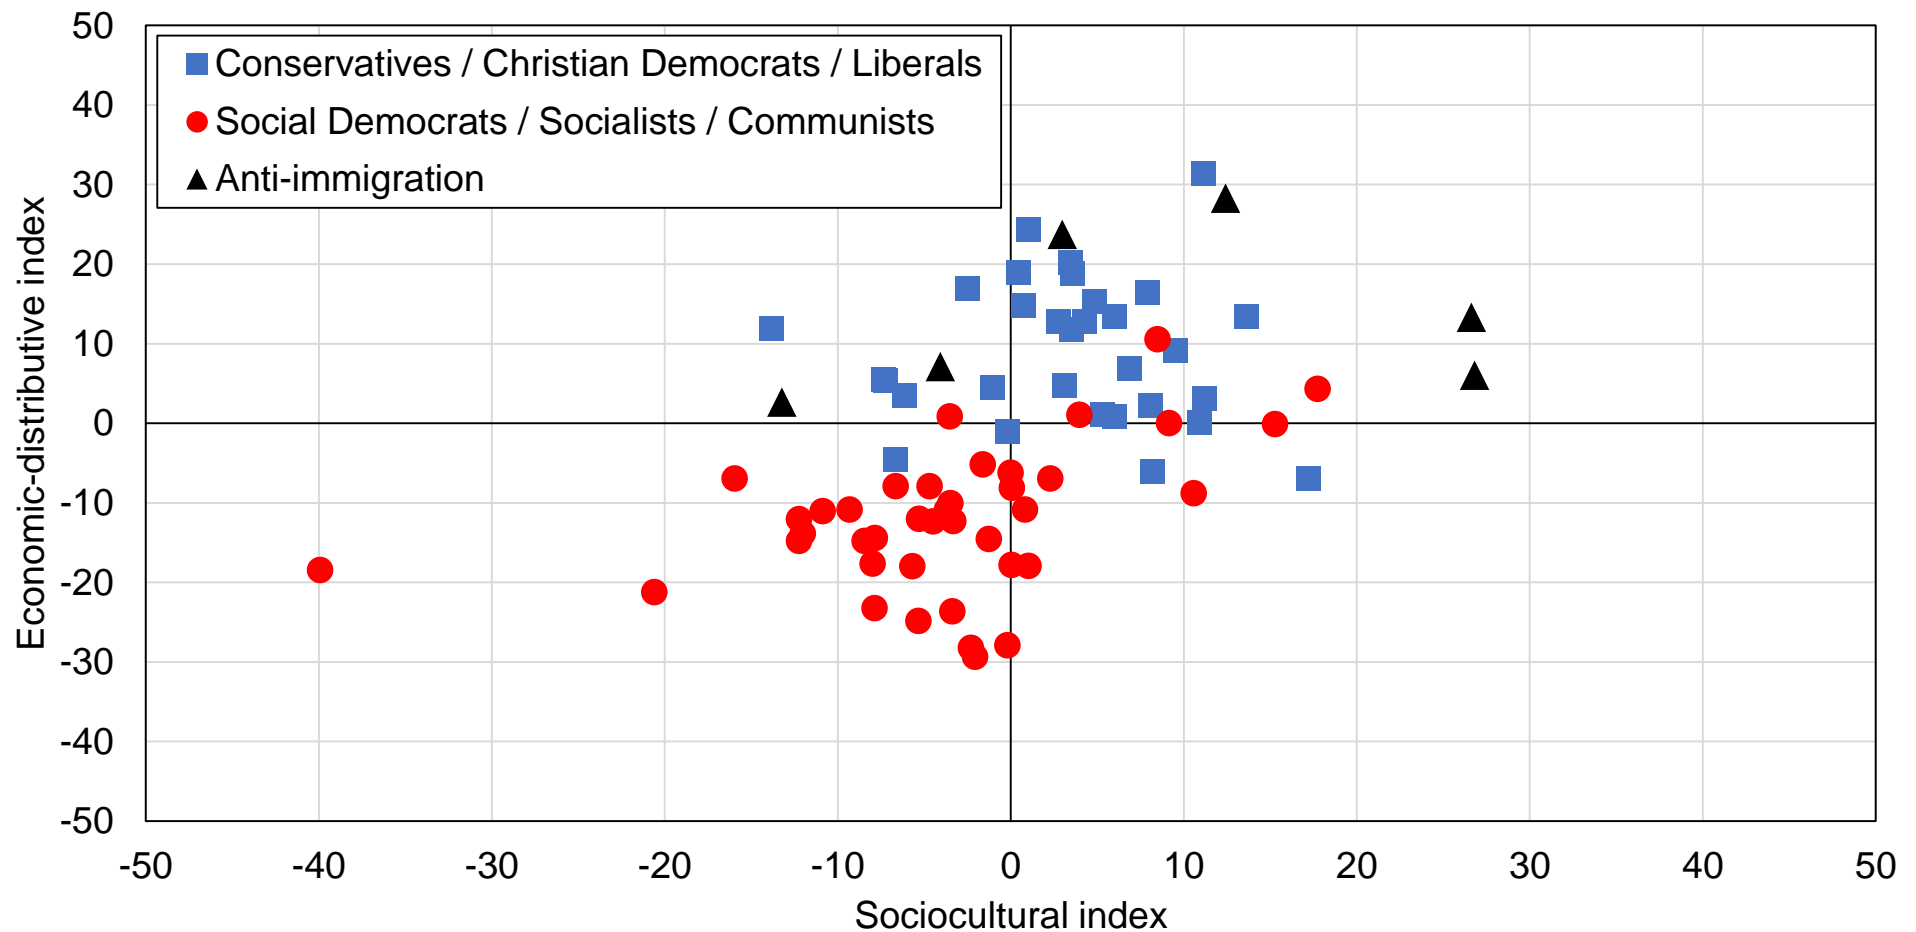

**Source:** authors' computations using the Comparative Manifesto Project database.

**Note:** the figure displays the average score of all parties available in the CMP dataset in the 1980s on the economic-distributive index (y-axis) and the sociocultural index (x-axis). Parties are categorized into conservative, Christian democratic, and liberal parties; social democratic, socialist, communist, and other left-wing parties, anti-immigration parties; and green parties.

**Figure B6 - Ideological polarization in Western democracies, 1990s**

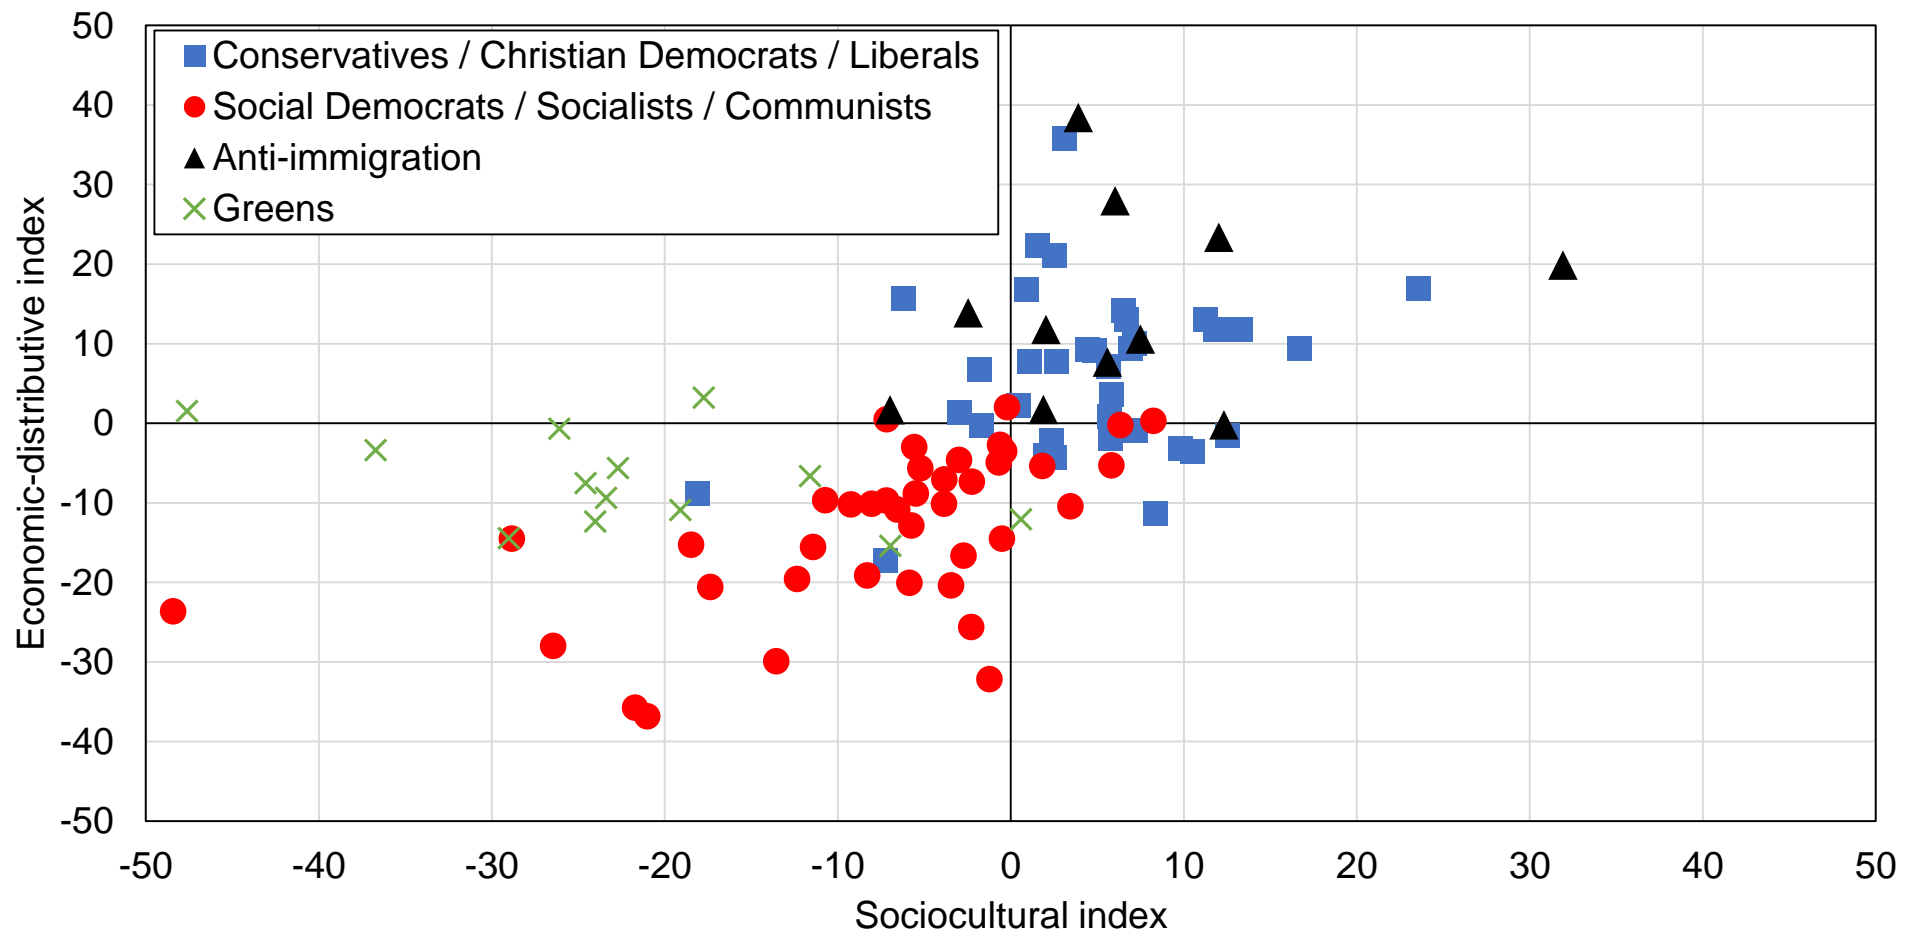

**Source:** authors' computations using the Comparative Manifesto Project database.

**Note:** the figure displays the average score of all parties available in the CMP dataset in the 1990s on the economic-distributive index (y-axis) and the sociocultural index (x-axis). Parties are categorized into conservative, Christian democratic, and liberal parties; social democratic, socialist, communist, and other left-wing parties, anti-immigration parties; and green parties.

**Figure B7 - Ideological polarization in Western democracies, 2000s**

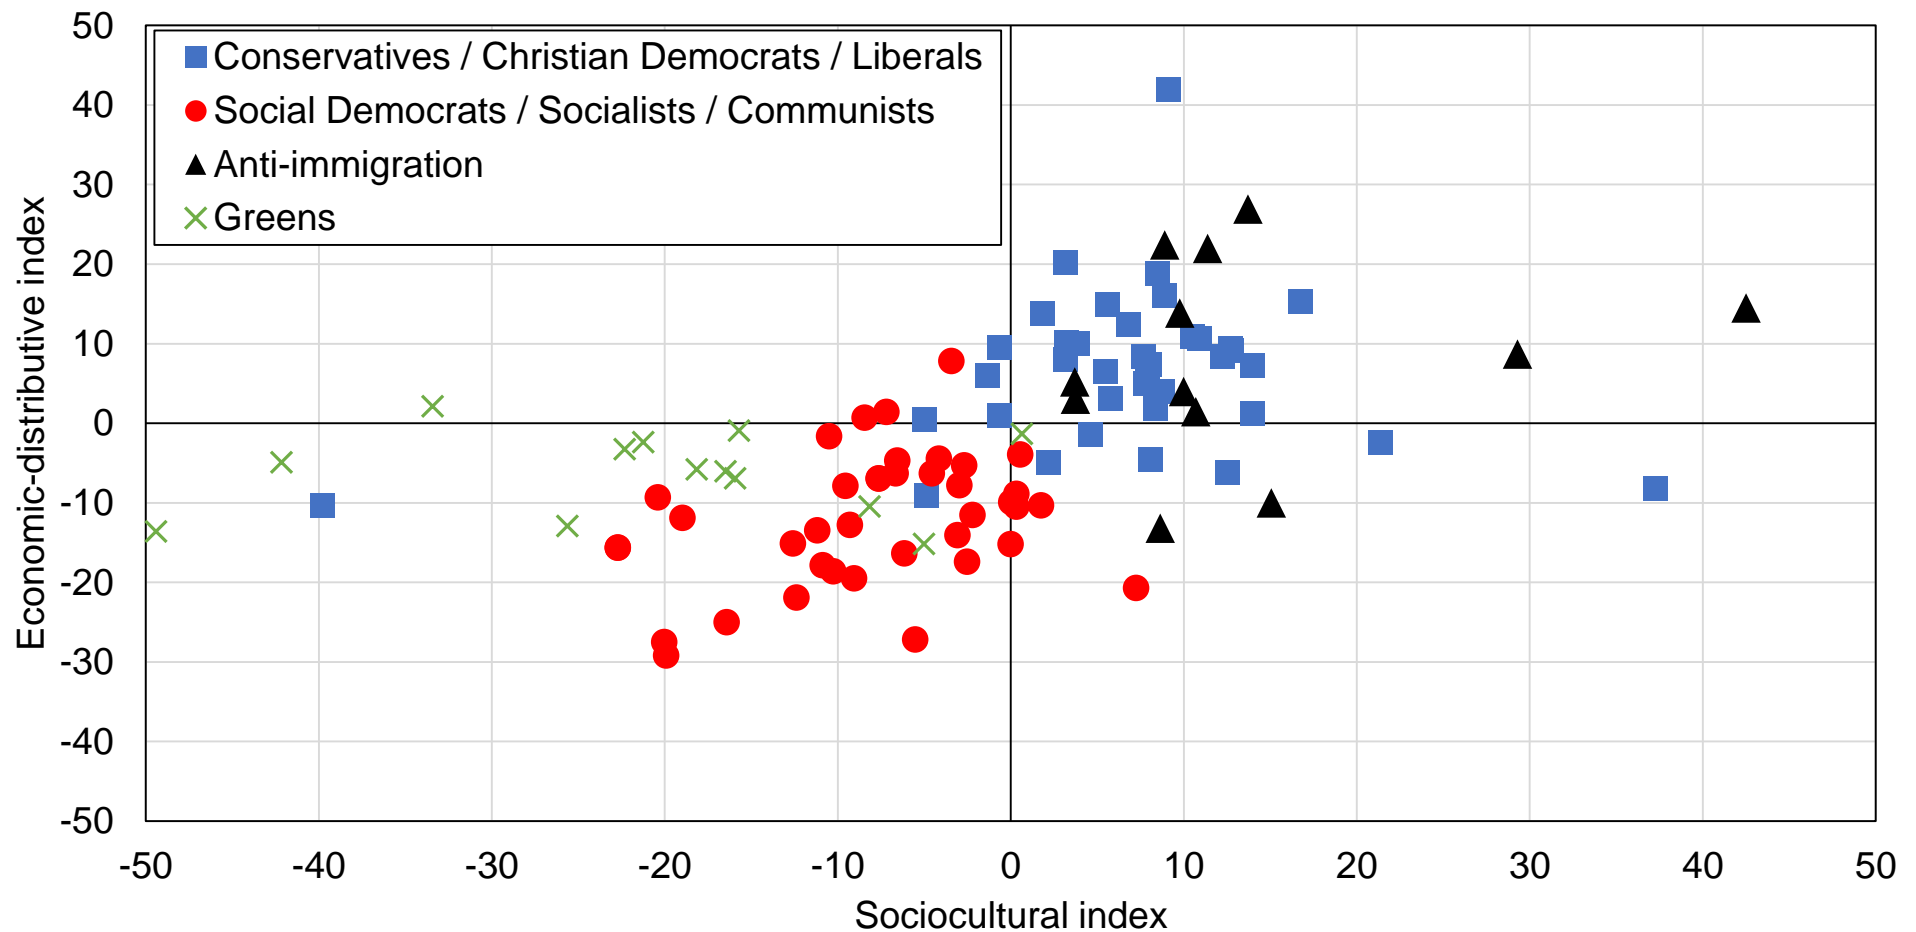

**Source:** authors' computations using the Comparative Manifesto Project database.

**Note:** the figure displays the average score of all parties available in the CMP dataset in the 2000s on the economic-distributive index (y-axis) and the sociocultural index (x-axis). Parties are categorized into conservative, Christian democratic, and liberal parties; social democratic, socialist, communist, and other left-wing parties, anti-immigration parties; and green parties.

**Figure B8 - Ideological polarization in Western democracies, 2010s**

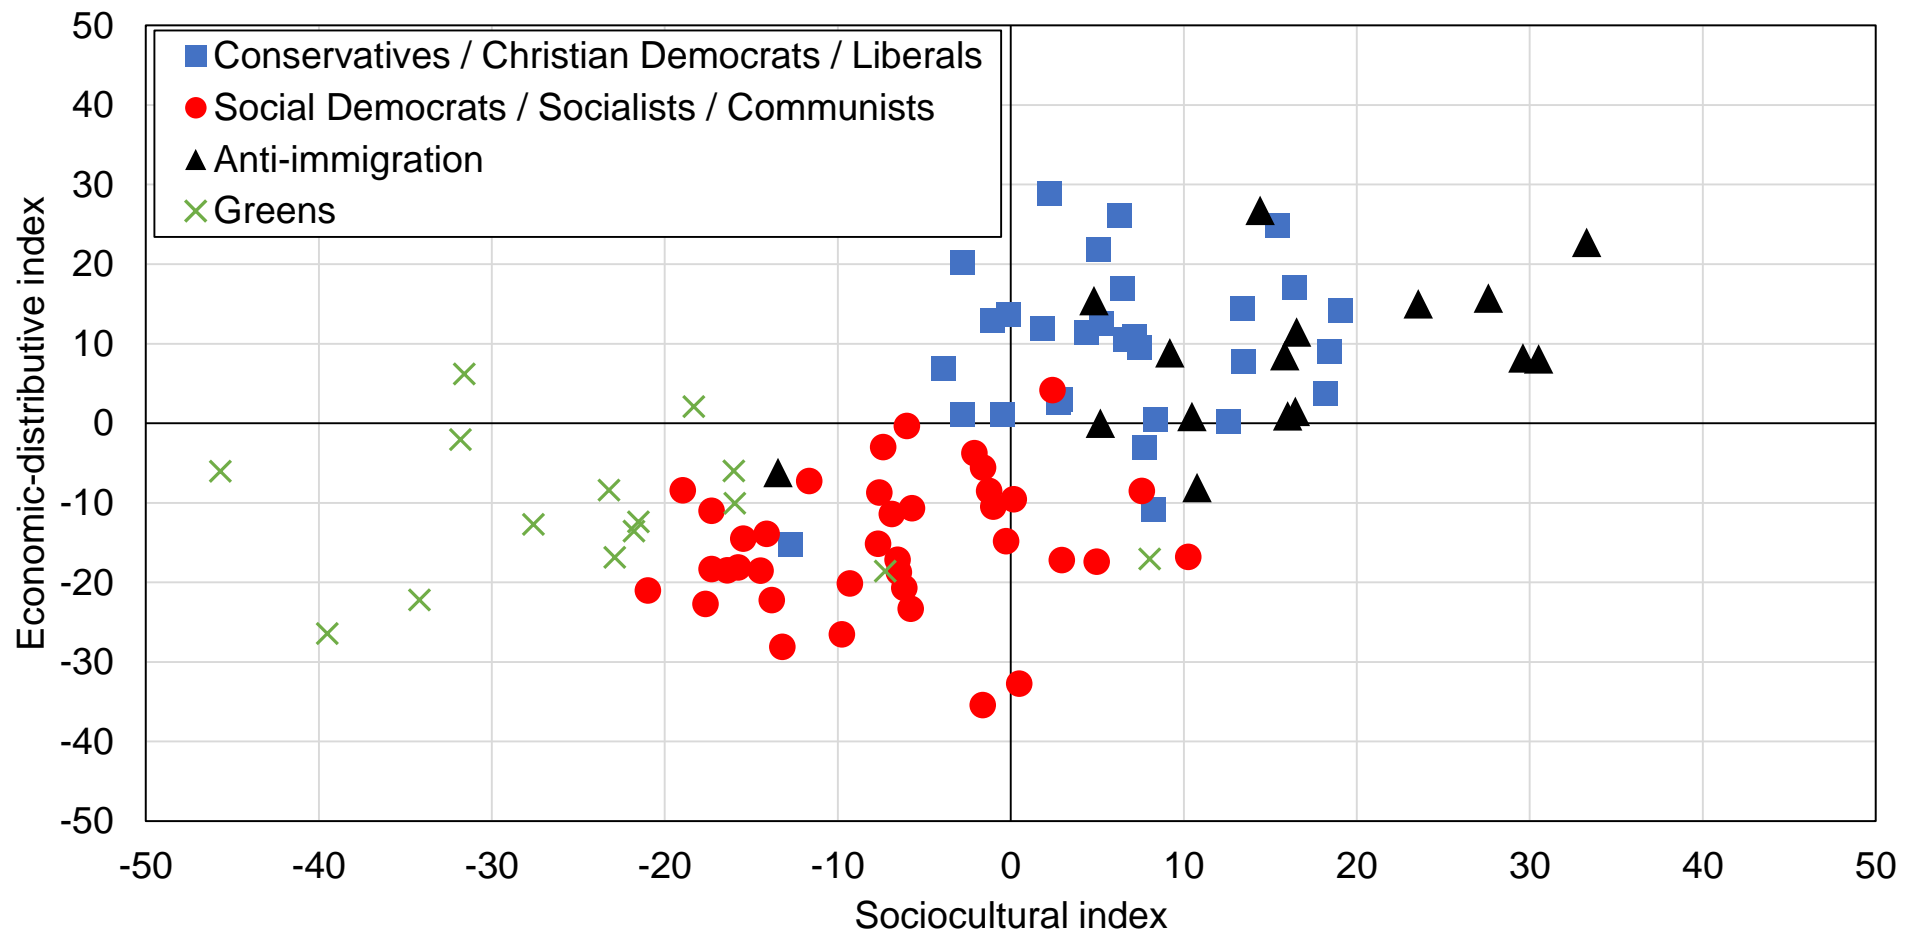

**Source:** authors' computations using the Comparative Manifesto Project database.

**Note:** the figure displays the average score of all parties available in the CMP dataset in the 2010s on the economic-distributive index (y-axis) and the sociocultural index (x-axis). Parties are categorized into conservative, Christian democratic, and liberal parties; social democratic, socialist, communist, and other left-wing parties, anti-immigration parties; and green parties.

**Figure B9 - Multidimensional political conflict and the divergence of income and education (bottom 50%)**

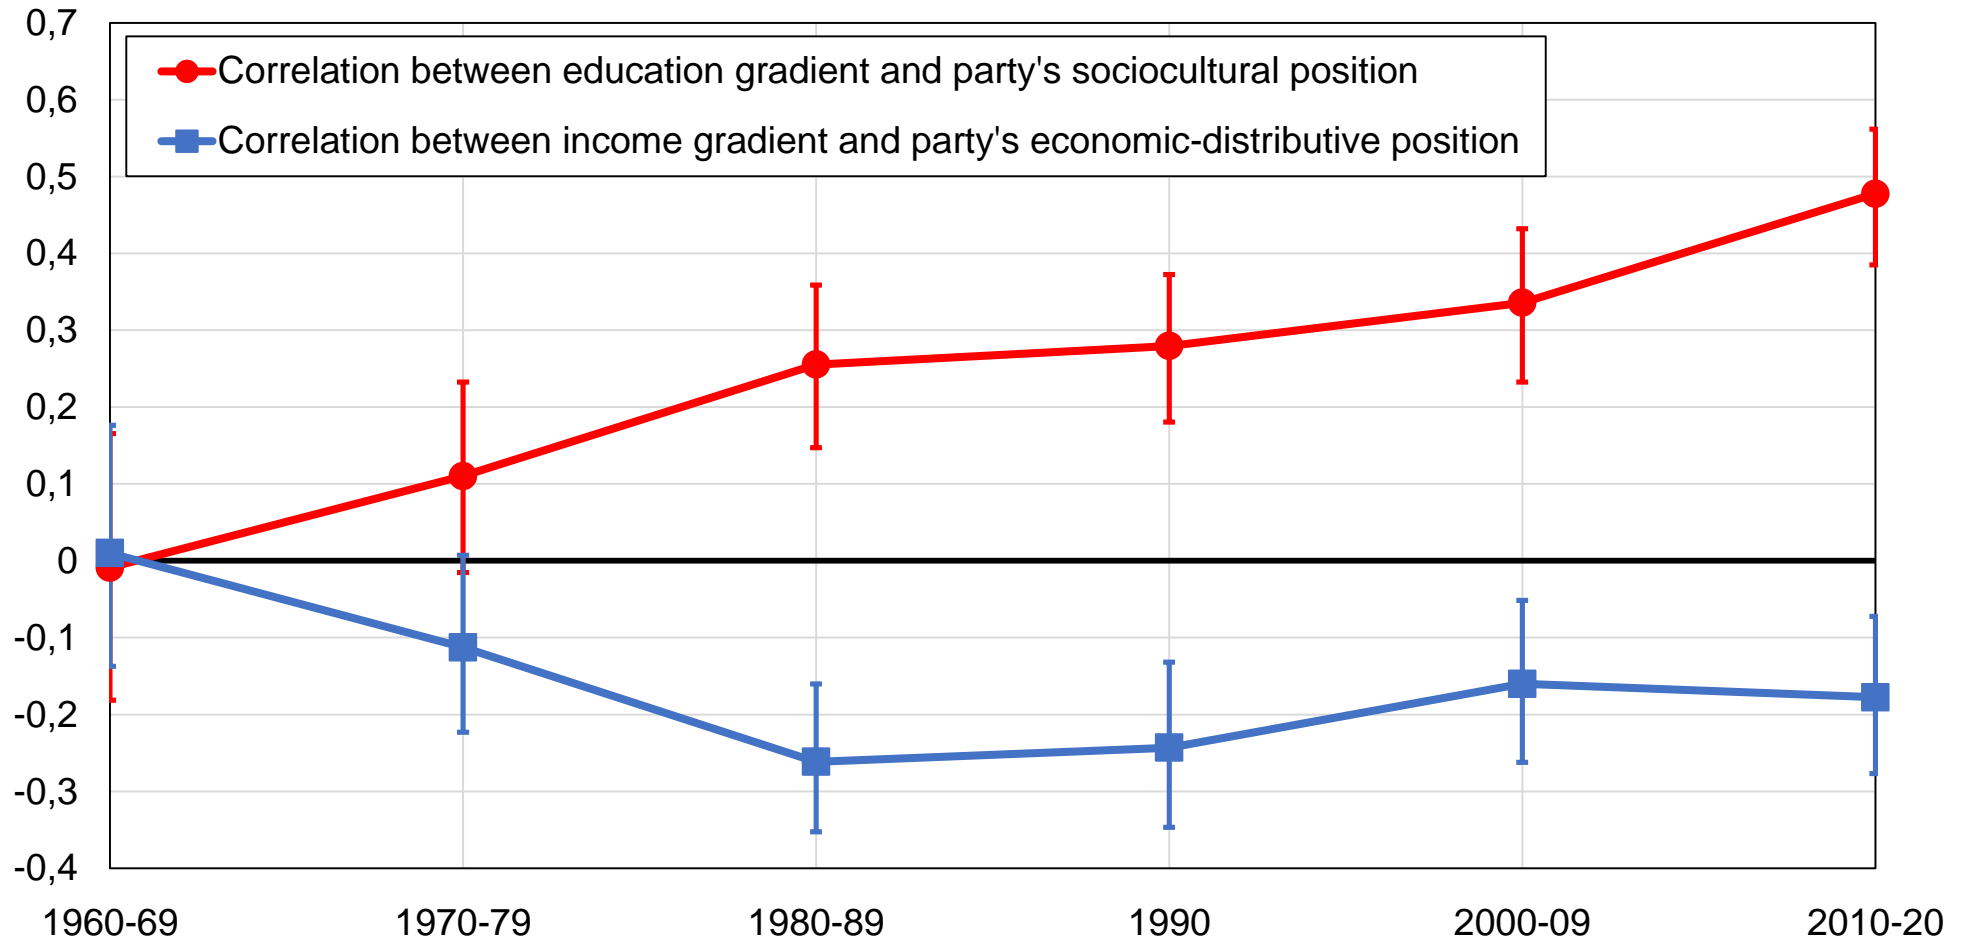

**Source:** authors' computations combining the World Political Cleavages and Inequality Database with Manifesto Project data.

**Note:** the upper lines plots the raw correlation between the education gradient (defined as the share of top 50% educated voters within the electorate of a given party) and the sociocultural index. The bottom line plots the raw correlation between the income gradient (defined as the share of top 50% income voters within the electorate of a given party) and the economic-distributive index (inverted, so that higher values correspond to greater pro-redistribution emphases). Error bars represent 95% confidence intervals.

**Figure B10 - Sociocultural polarization and educational divides, 1970s**

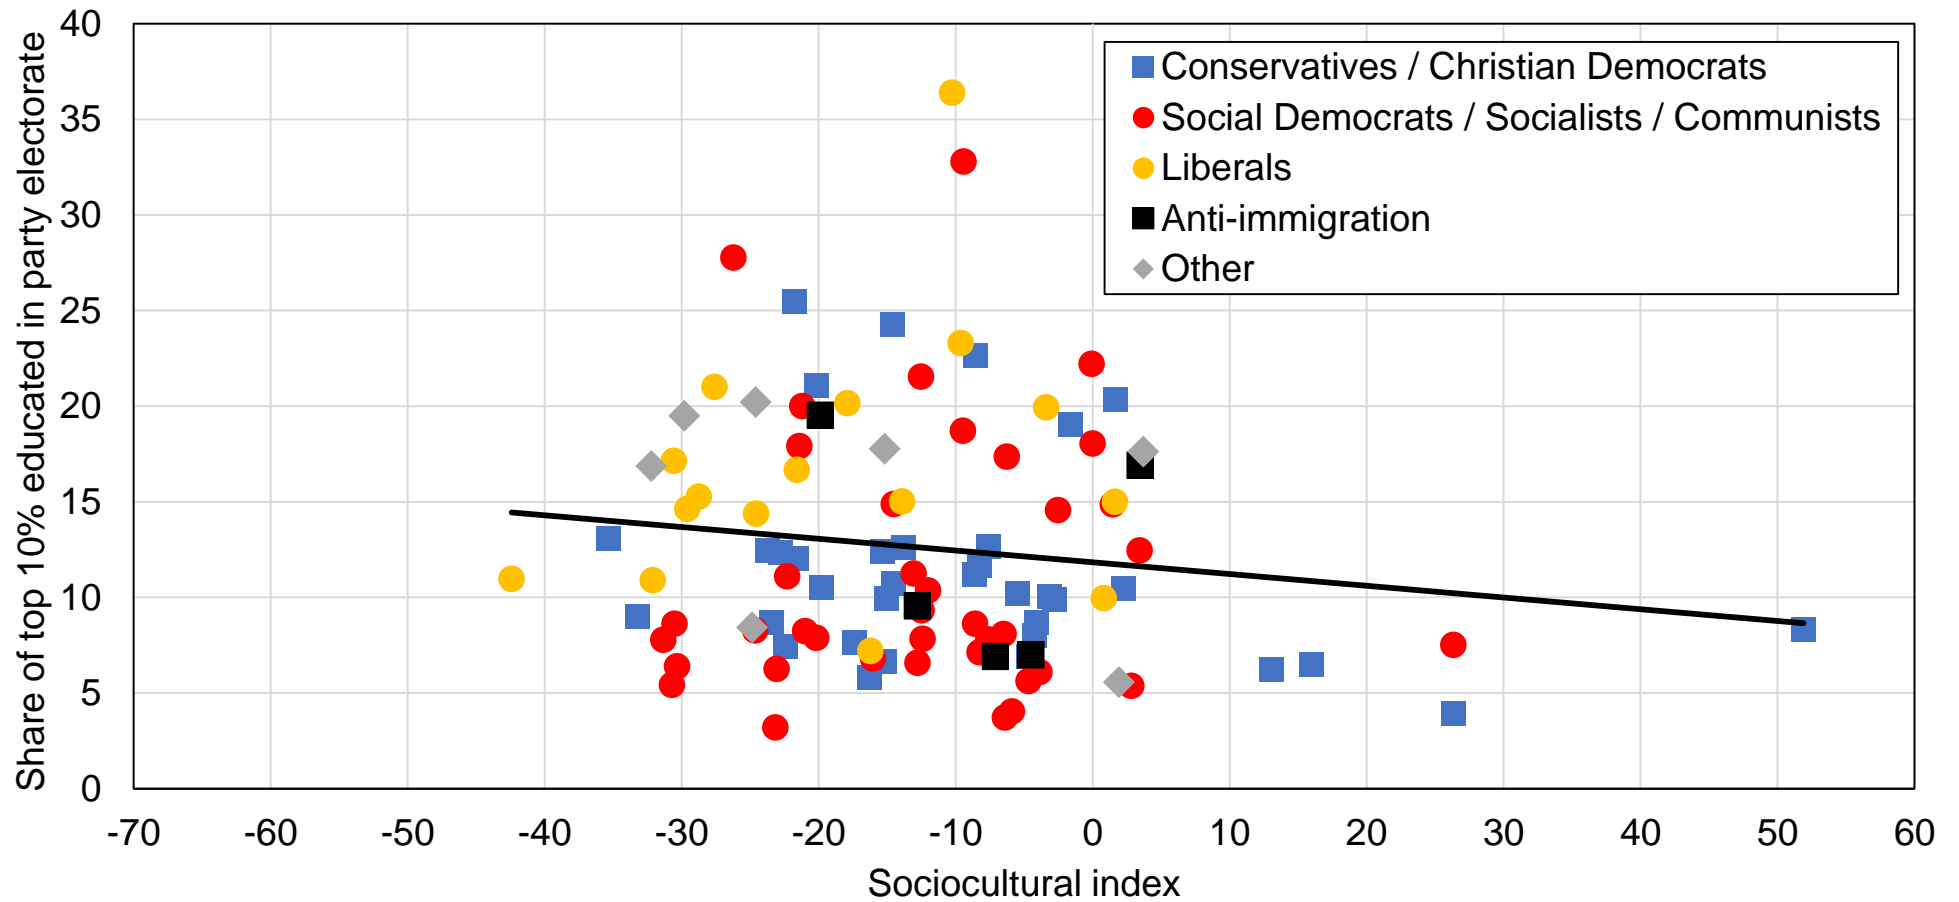

**Source:** authors' computations combining the World Political Cleavages and Inequality Database and Manifesto Project data.

**Note:** parties are categorized into conservative and Christian democratic parties; liberal and social-liberal parties; social democratic, socialist, communist and other left-wing parties, anti-immigration parties; green parties; and other unclassifiable parties.



**Figure B11 - Sociocultural polarization and educational divides, 1980s**

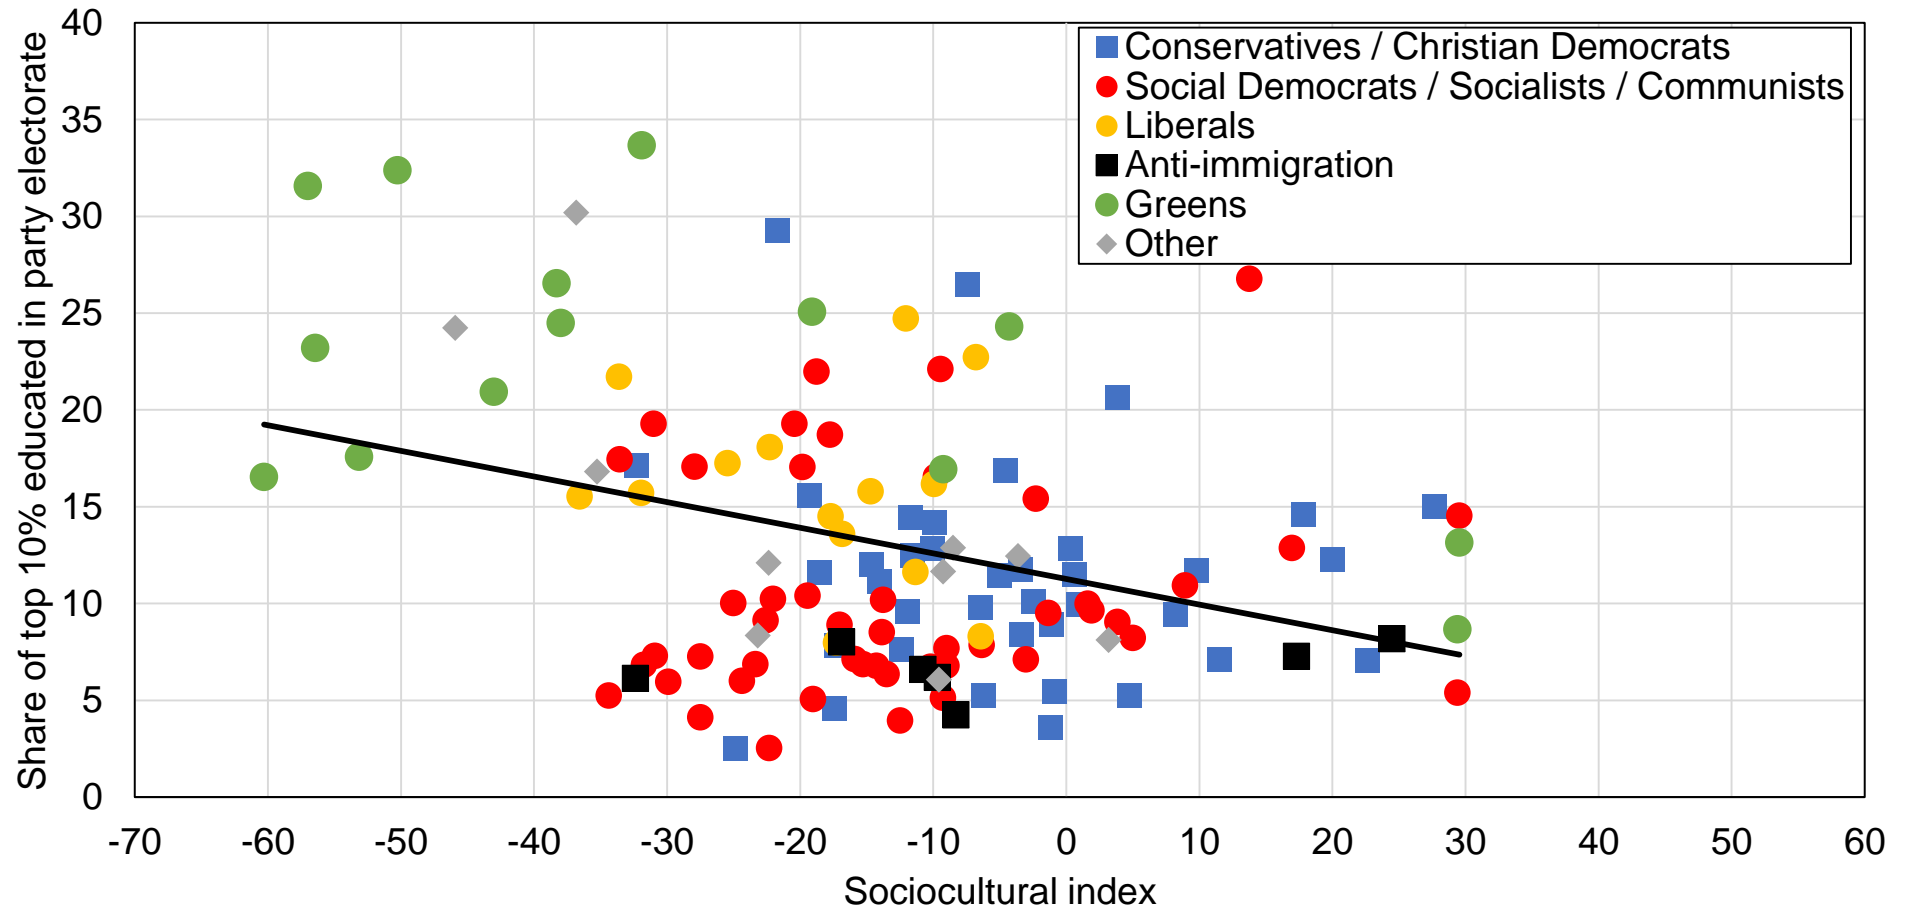

**Source:** authors' computations combining the World Political Cleavages and Inequality Database and Manifesto Project data.

**Note:** parties are categorized into conservative and Christian democratic parties; liberal and social-liberal parties; social democratic, socialist, communist and other left-wing parties, anti-immigration parties; green parties; and other unclassifiable parties.

**Figure B12 - Sociocultural polarization and educational divides, 1990s**

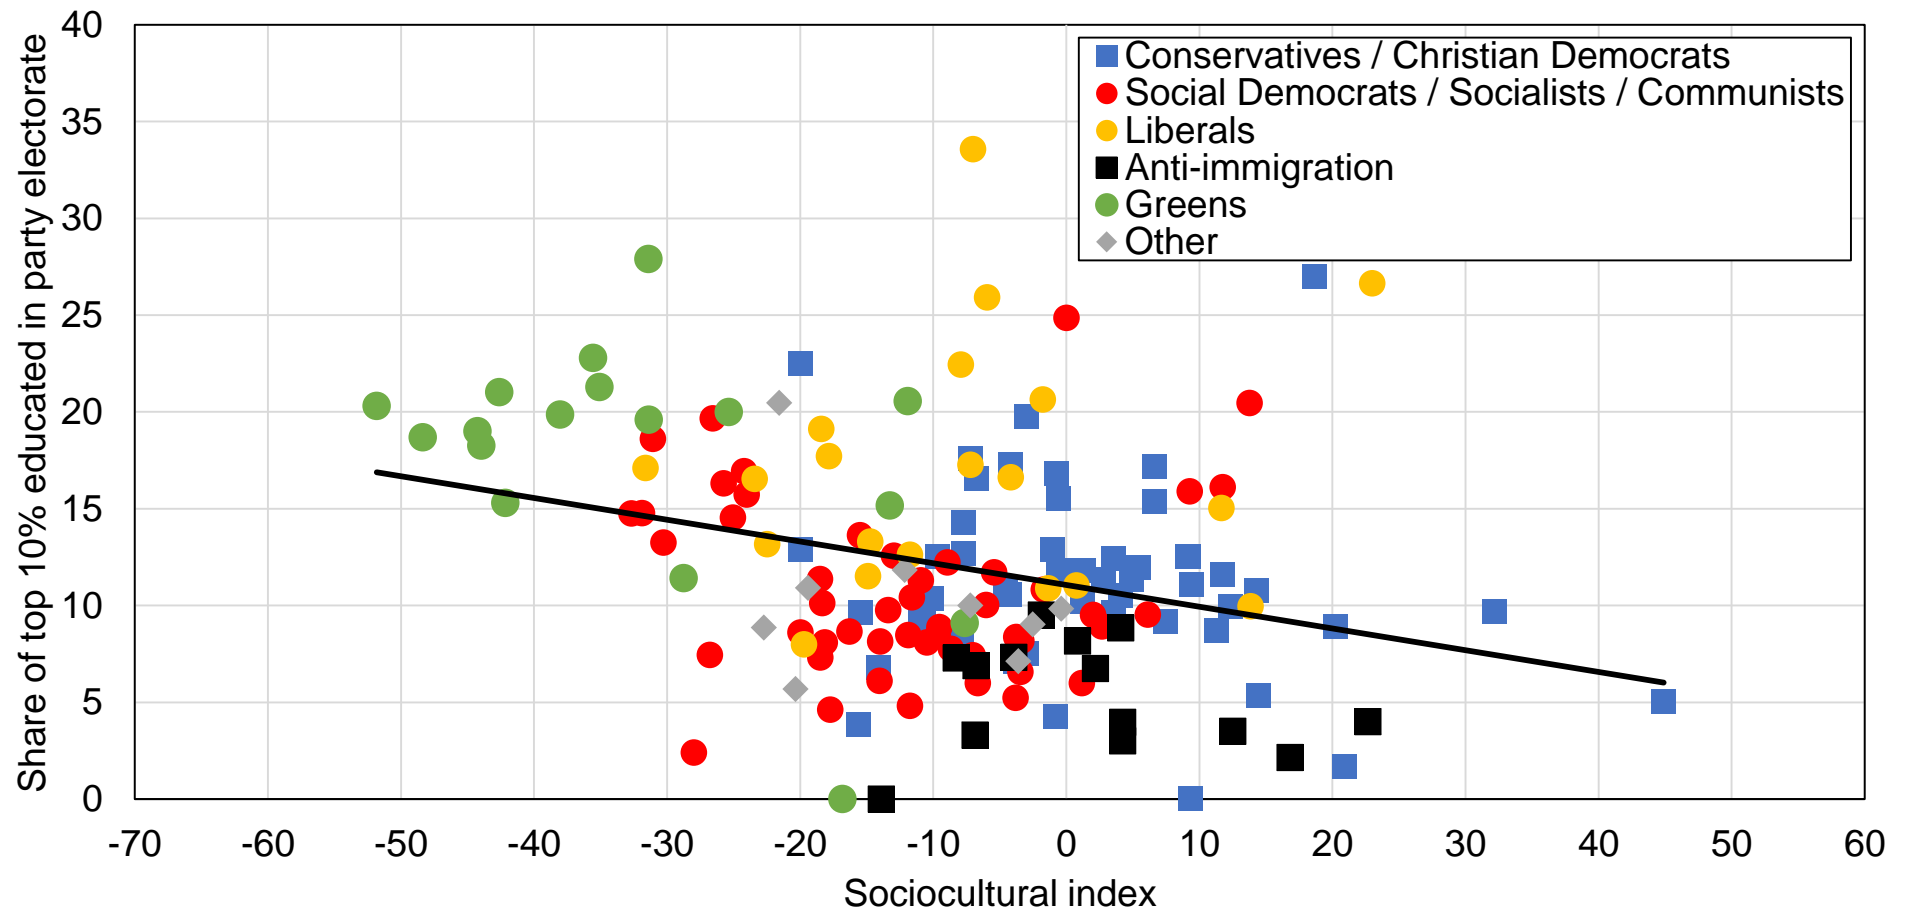

**Source:** authors' computations combining the World Political Cleavages and Inequality Database and Manifesto Project data.

**Note:** parties are categorized into conservative and Christian democratic parties; liberal and social-liberal parties; social democratic, socialist, communist and other left-wing parties, anti-immigration parties; green parties; and other unclassifiable parties.

**Figure B13 - Sociocultural polarization and educational divides, 2000s**

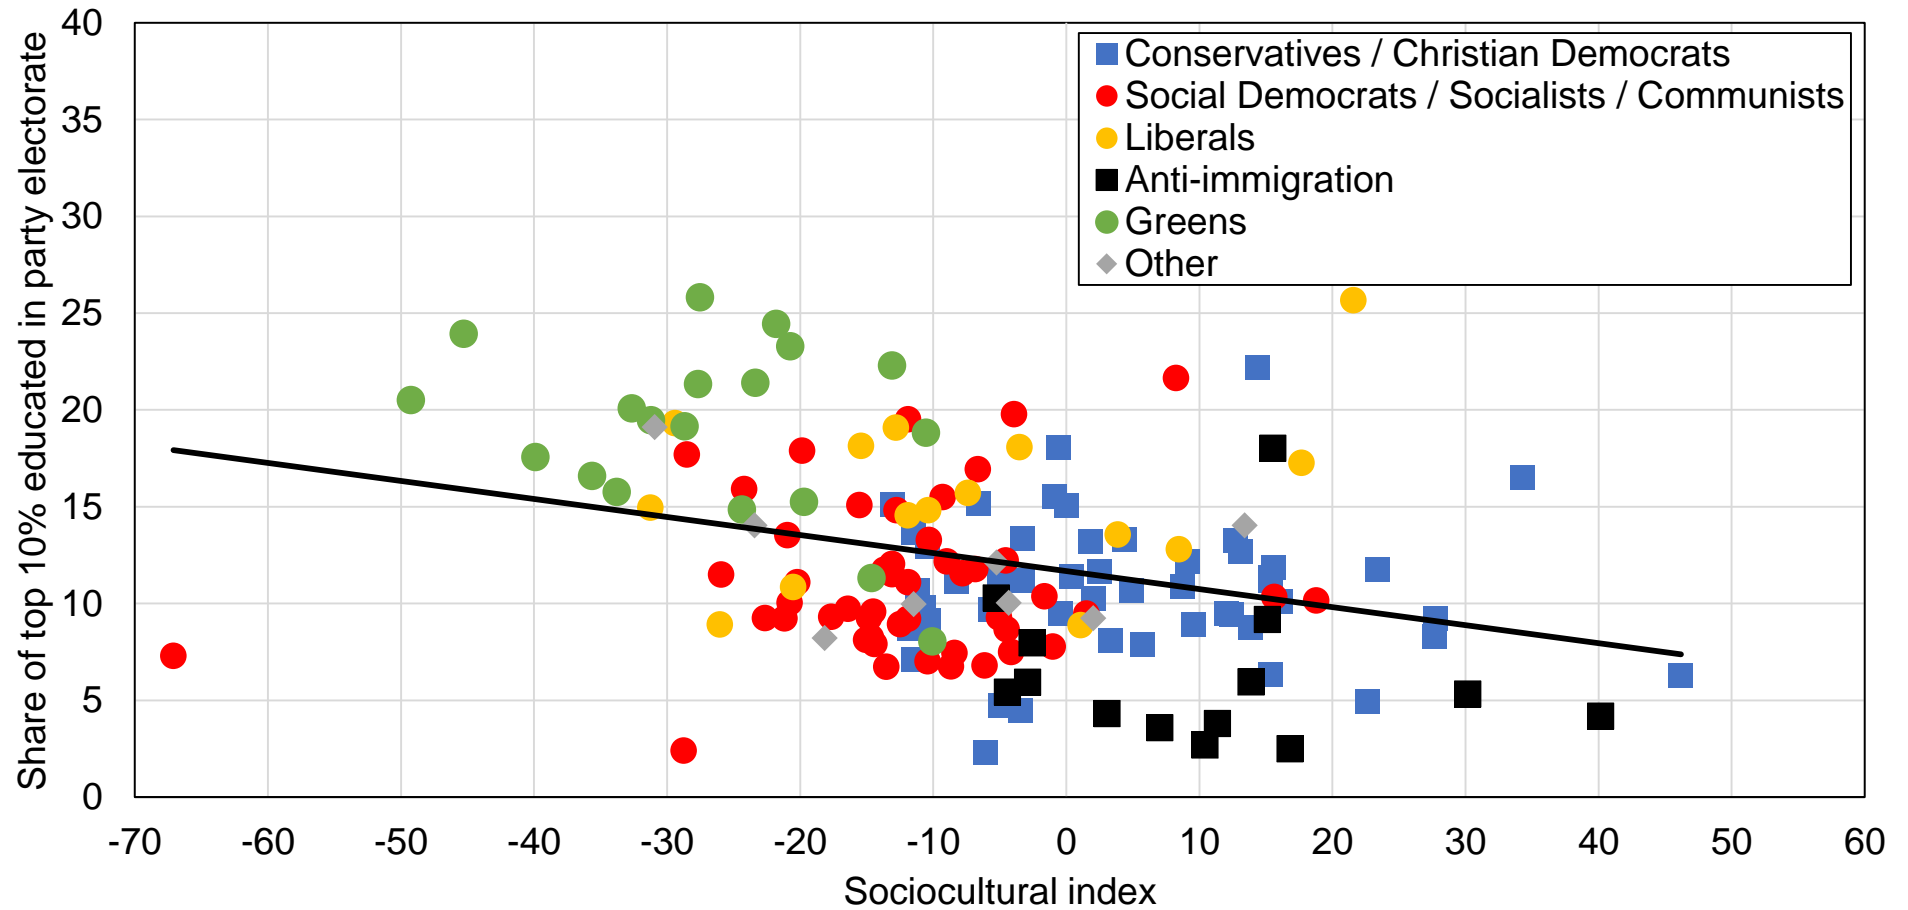

**Source:** authors' computations combining the World Political Cleavages and Inequality Database and Manifesto Project data.

**Note:** parties are categorized into conservative and Christian democratic parties; liberal and social-liberal parties; social democratic, socialist, communist and other left-wing parties, anti-immigration parties; green parties; and other unclassifiable parties.

**Figure B14 - Sociocultural polarization and educational divides, 2010s**

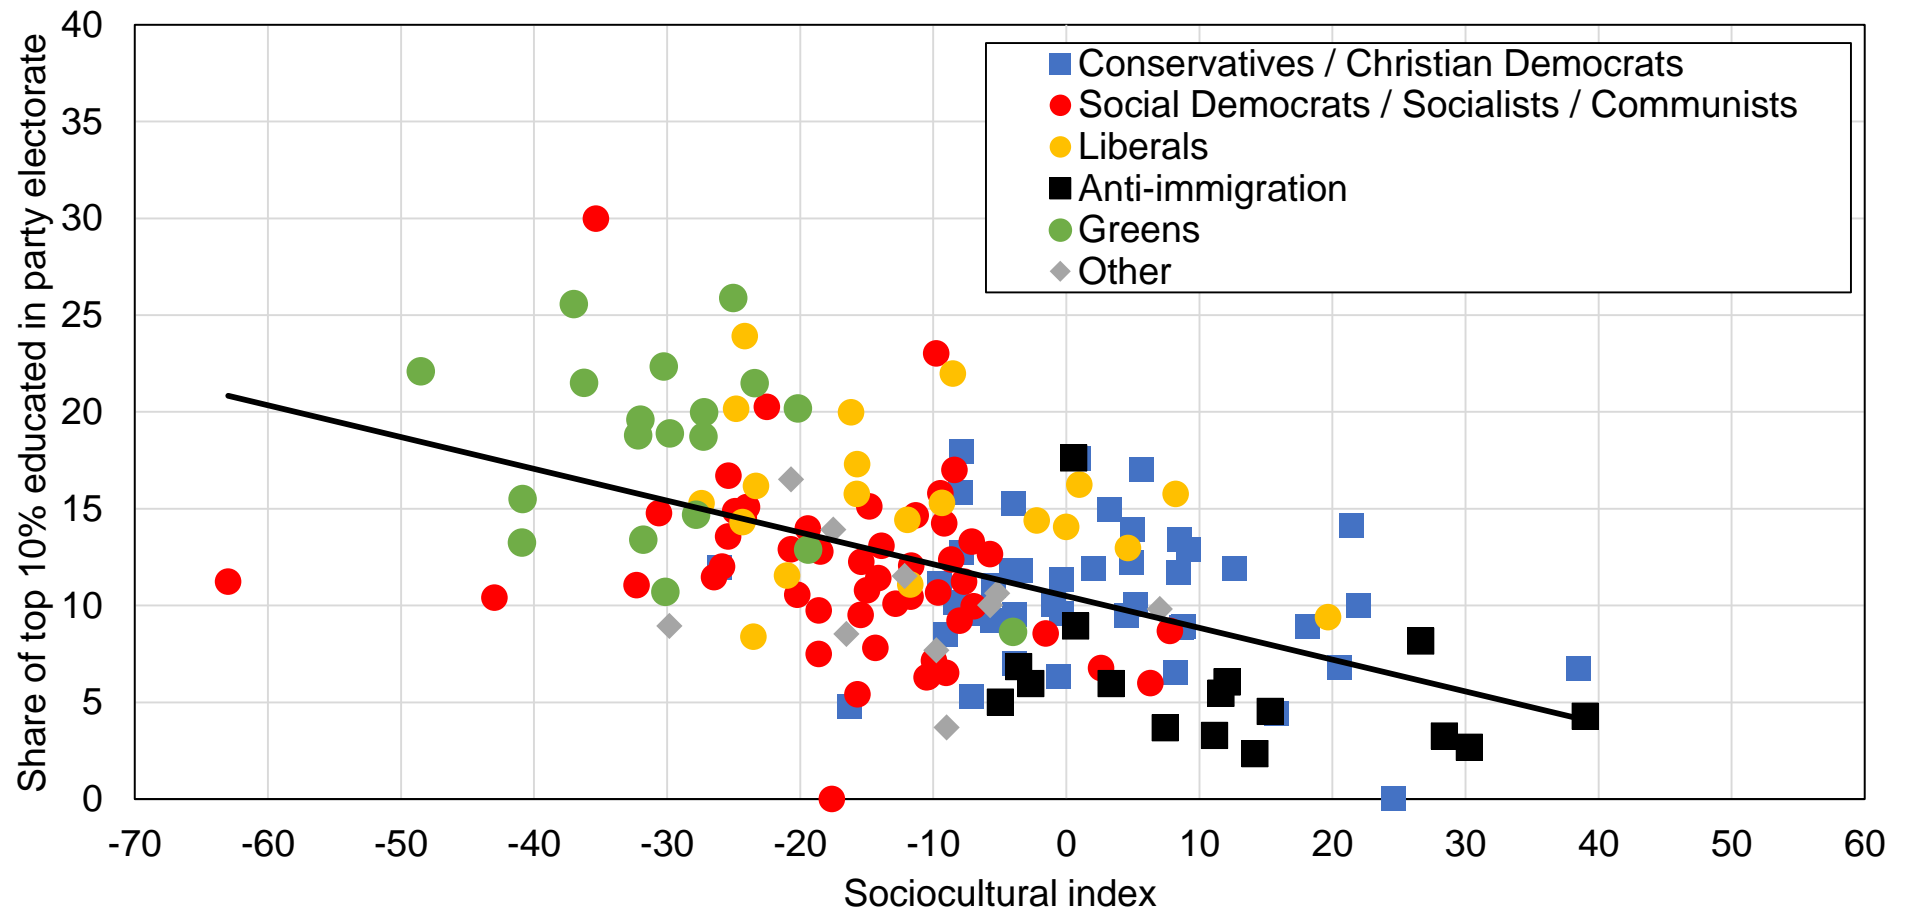

**Source:** authors' computations combining the World Political Cleavages and Inequality Database and Manifesto Project data.

**Note:** parties are categorized into conservative and Christian democratic parties; liberal and social-liberal parties; social democratic, socialist, communist and other left-wing parties, anti-immigration parties; green parties; and other unclassifiable parties.

**Figure B15 - Multidimensional political conflict and the divergence of income and education (country-level analysis)**

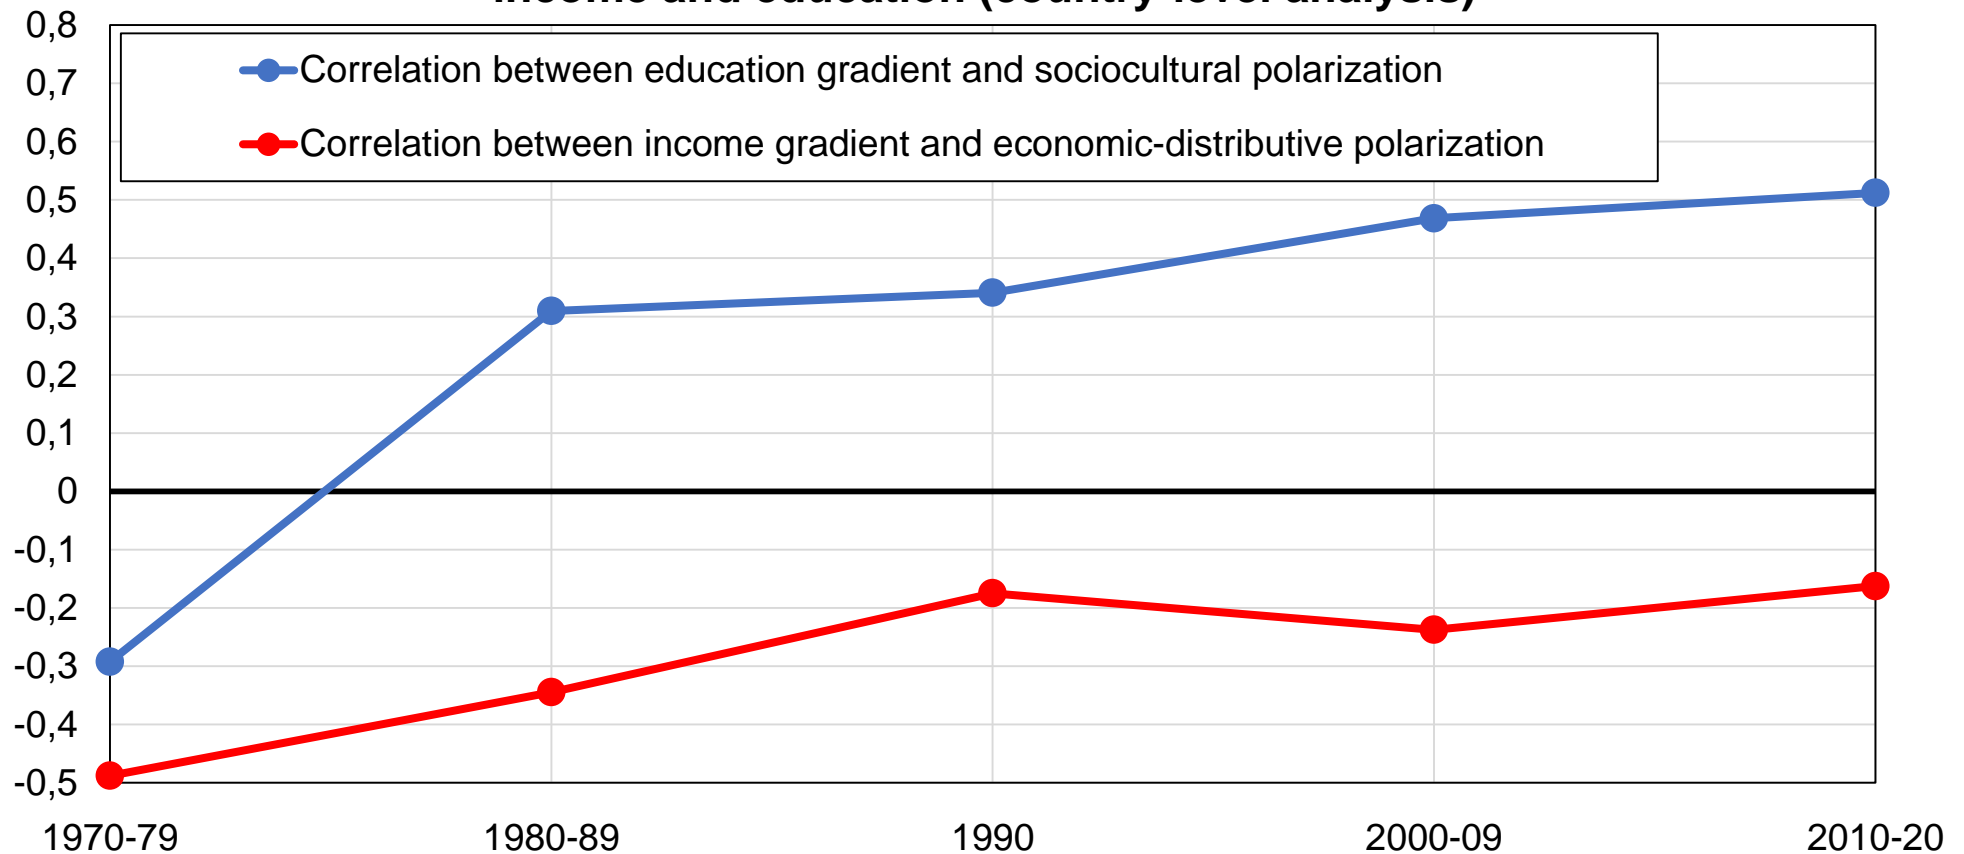

**Source:** authors' computations combining the World Political Cleavages and Inequality Database and Manifesto Project data.

**Note:** the upper line plots the raw correlation between the education gradient (defined as the difference between the share of top 10% educated voters and the share of bottom 90% educated voters voting for left-wing parties) and sociocultural polarization (defined as the standard deviation of the sociocultural index across all parties in a given country). Conversely, the bottom line plots the raw correlation between the income gradient and economic-distributive polarization (inverted, so that higher values correspond to greater pro-redistribution emphases). Both polarization indices are normalized to the average standard deviation to highlight relative evolutions. The unit of observation is the country.

**Figure B16 - Average left-right positions of political parties in Western democracies, 2000-2020: survey data vs. manifesto data**

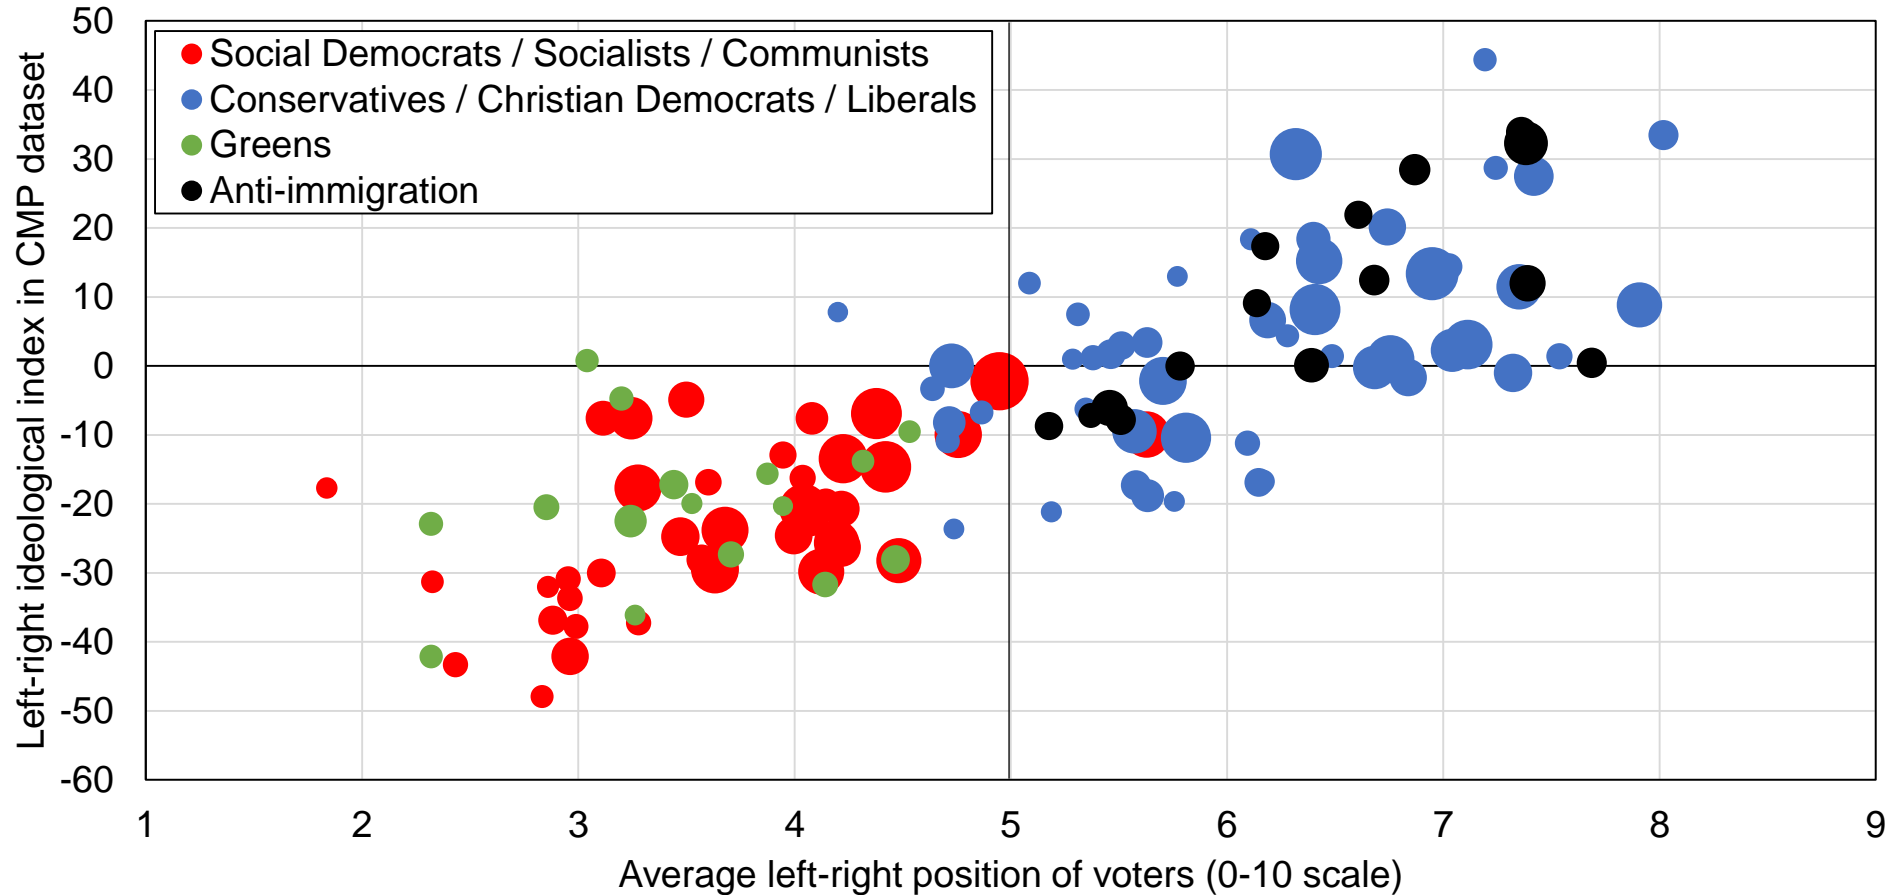

**Source:** authors' computations combining the World Political Cleavages and Inequality Database and the CMP database.

**Note:** the figure displays the average score of parties on the left-right ideological index in the Comparative Manifesto Project database (y-axis) and the average self-reported left-right placement of voters supporting these parties, as reported in survey data (x-axis). Average over the 2000-2020 period. Excludes parties that received less than 5% of the vote in a given election. Parties are categorized into conservative, Christian democratic, and liberal parties; social democratic, socialist, communist and other left-wing parties, anti-immigration parties; and green parties. The size of bubbles is proportional to the square root of the average vote share of each party.

**Figure B17 - Average left-right positions of political parties in Western democracies, 2000-2020: survey data vs. manifesto data (normalized)**

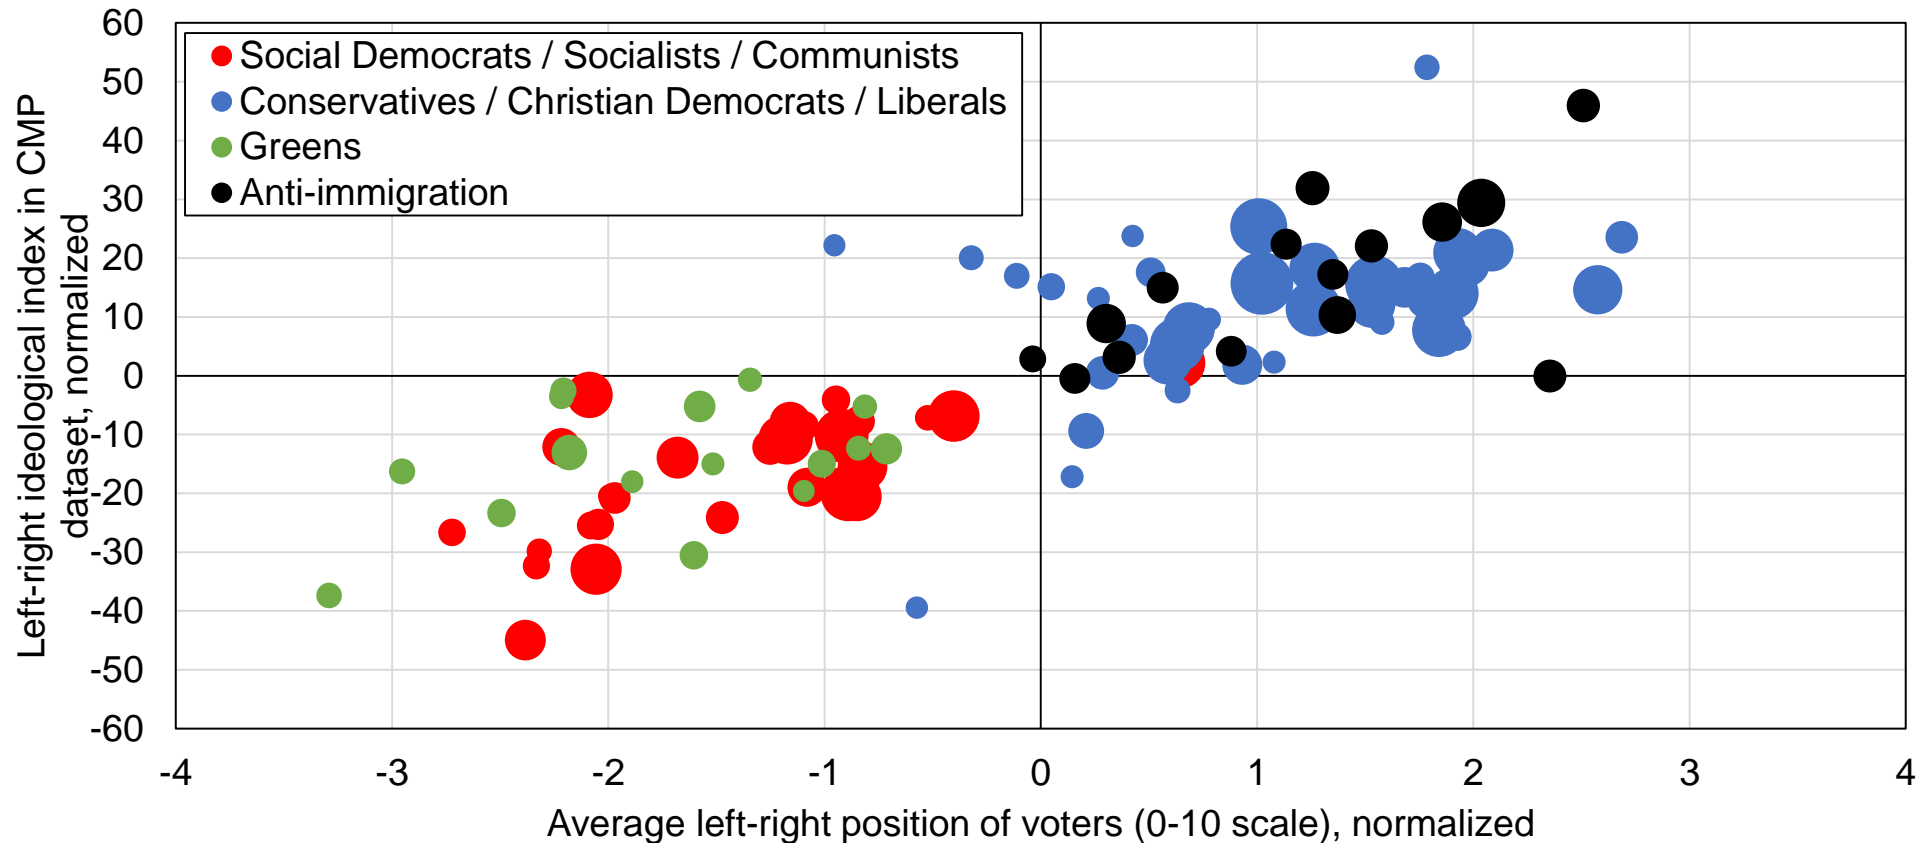

**Source:** authors' computations combining the World Political Cleavages and Inequality Database and the CMP database.

**Note:** the figure displays the average score of parties on the left-right ideological index in the Comparative Manifesto Project database (y-axis) and the average self-reported left-right placement of voters supporting these parties, as reported in survey data (x-axis). Both variables are normalized by taking the difference between the party's value and the vote-share-weighted average value in a given country-year. Average over the 2000-2020 period. Excludes parties that received less than 5% of the vote in a given election. Parties are categorized into conservative, Christian democratic, and liberal parties; social democratic, socialist, communist and other left-wing parties, anti-immigration parties; and green parties. The size of bubbles is proportional to the square root of the average vote share of each party.

**Figure B18 - Average self-declared left-right position of voters supporting Conservative / Christian Democratic / Liberal parties**

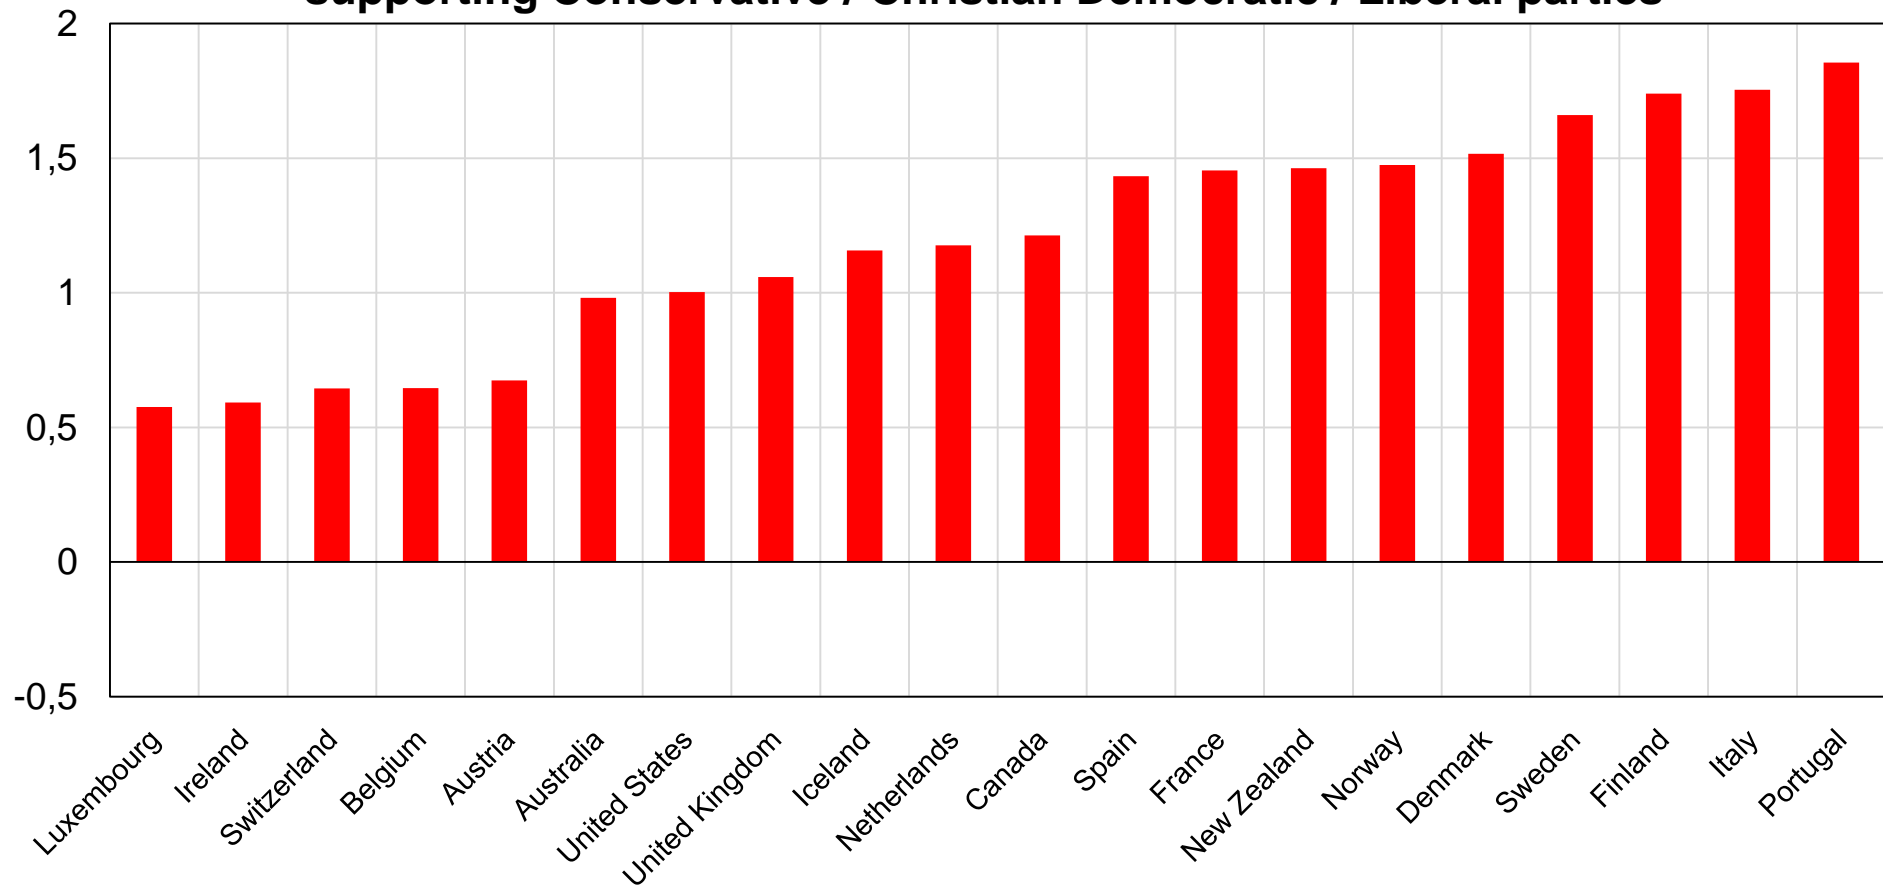

**Source:** authors' computations using the World Political Cleavages and Inequality Database.

**Note:** the figure represents the difference between the average self-declared left-right position of voters supporting Conservative, Christian Democratic, and Liberal parties and the average self-declared left-right position of all voters over the 2000-2020 period by country.

**Interpretation:** In all countries, voters supporting Conservative / Christian Democratic / Liberal parties are significantly more likely to declare being more right-wing than other voters.



**Figure B19 - Average self-declared left-right position of voters supporting anti-immigration parties**

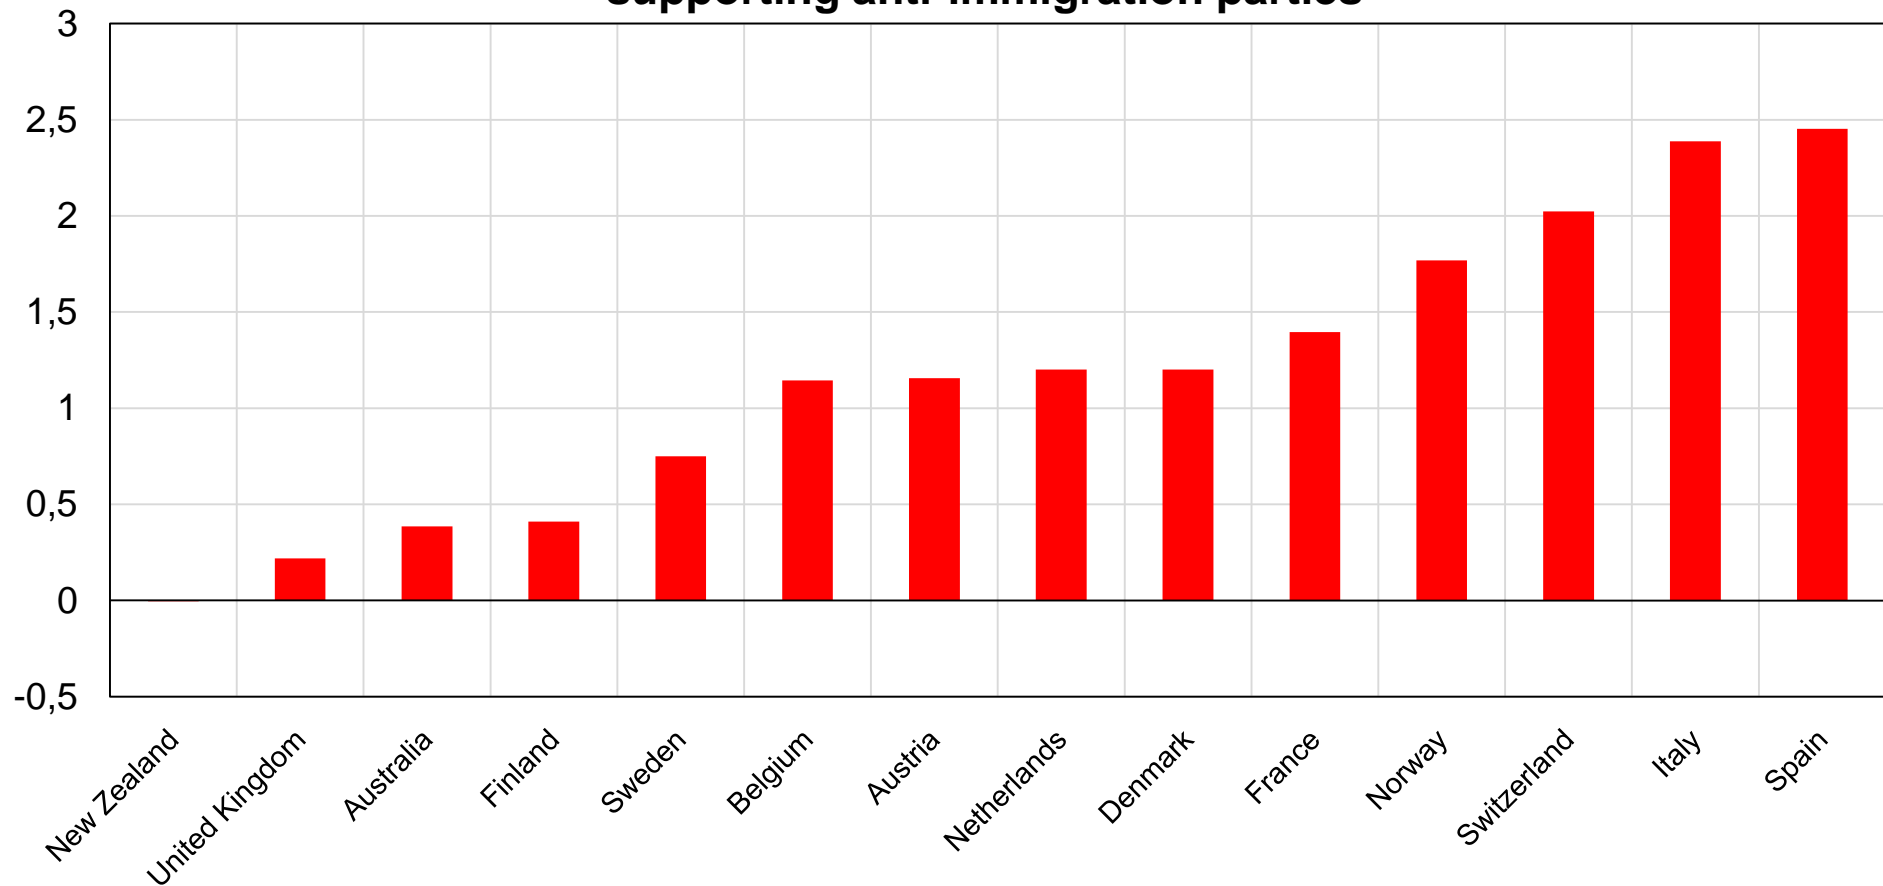

**Source:** authors' computations using the World Political Cleavages and Inequality Database.

**Note:** the figure represents the difference between the average self-declared left-right position of voters supporting anti-immigration parties and the average self-declared left-right position of all voters over the 2000-2020 period by country.

**Interpretation:** In nearly all countries, voters supporting anti-immigration parties are significantly more likely to declare being more right-wing than other voters.

**Figure B20 - Average self-declared left-right position of voters supporting Social Democratic / Socialist / Communist / Other left-wing parties (excl. Greens)**

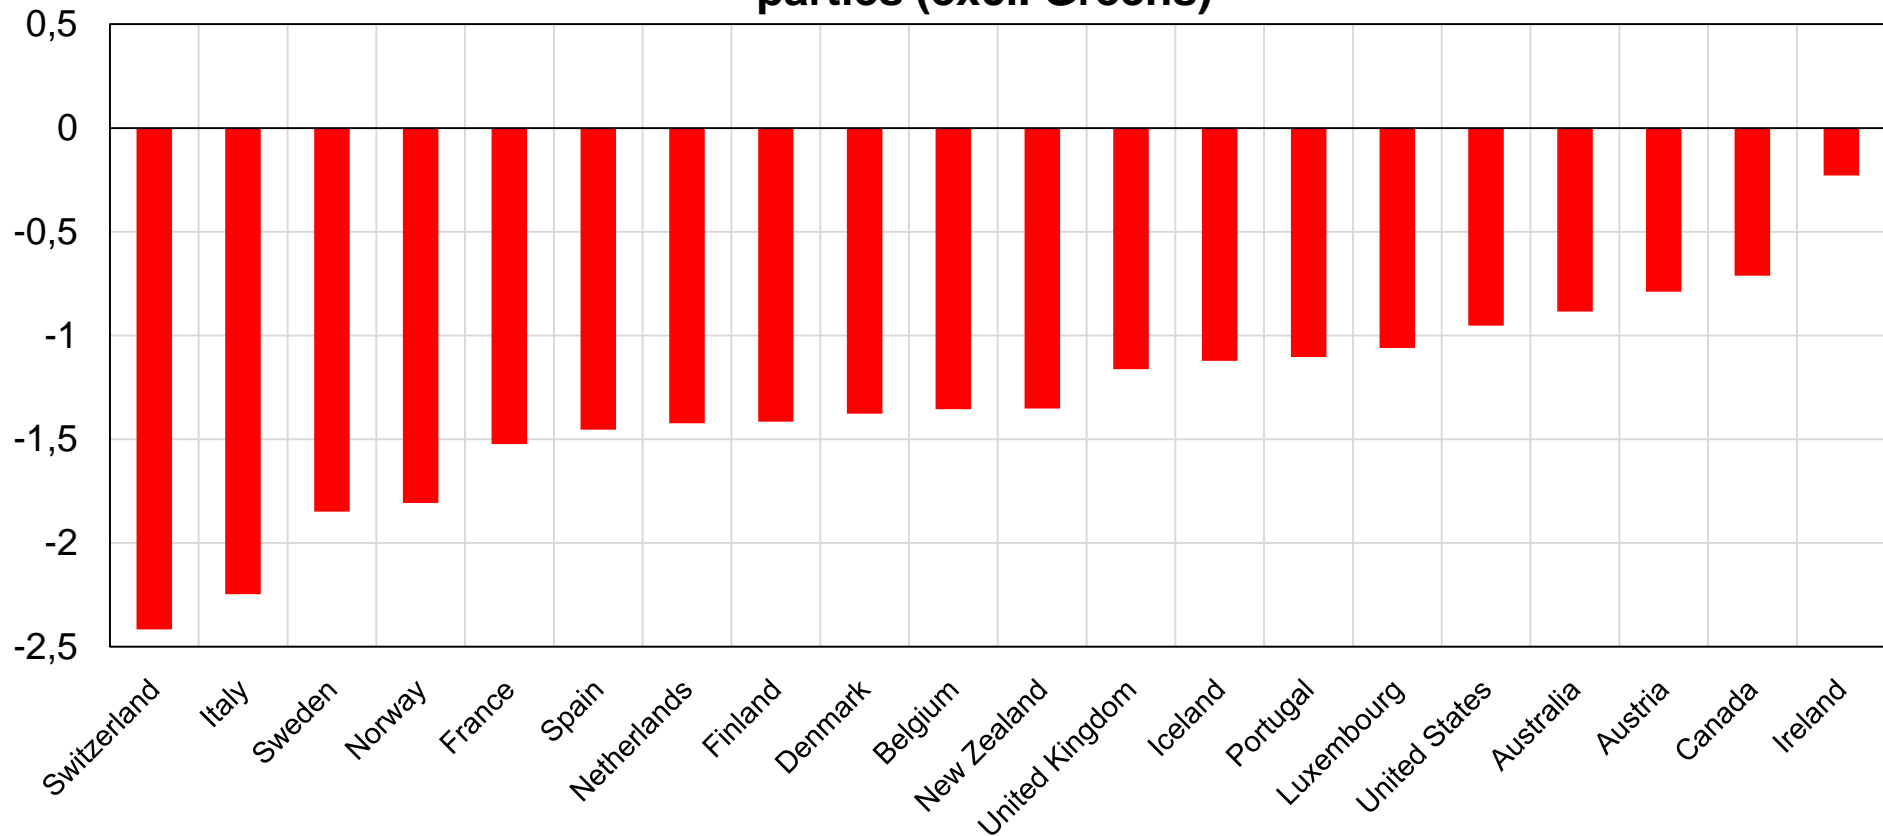

**Source:** authors' computations using the World Political Cleavages and Inequality Database.

**Note:** the figure represents the difference between the average self-declared left-right position of voters supporting Social Democratic, Socialist, communist and other left-wing parties (excluding Greens) and the average self-declared left-right position of all voters over the 2000-2020 period by country.

**Interpretation:** In all countries, voters supporting Social Democratic / Socialist / Communist / Other left-wing parties are significantly more likely to declare being more left-wing than other voters.

**Figure B21 - Average self-declared left-right position of voters supporting green parties**

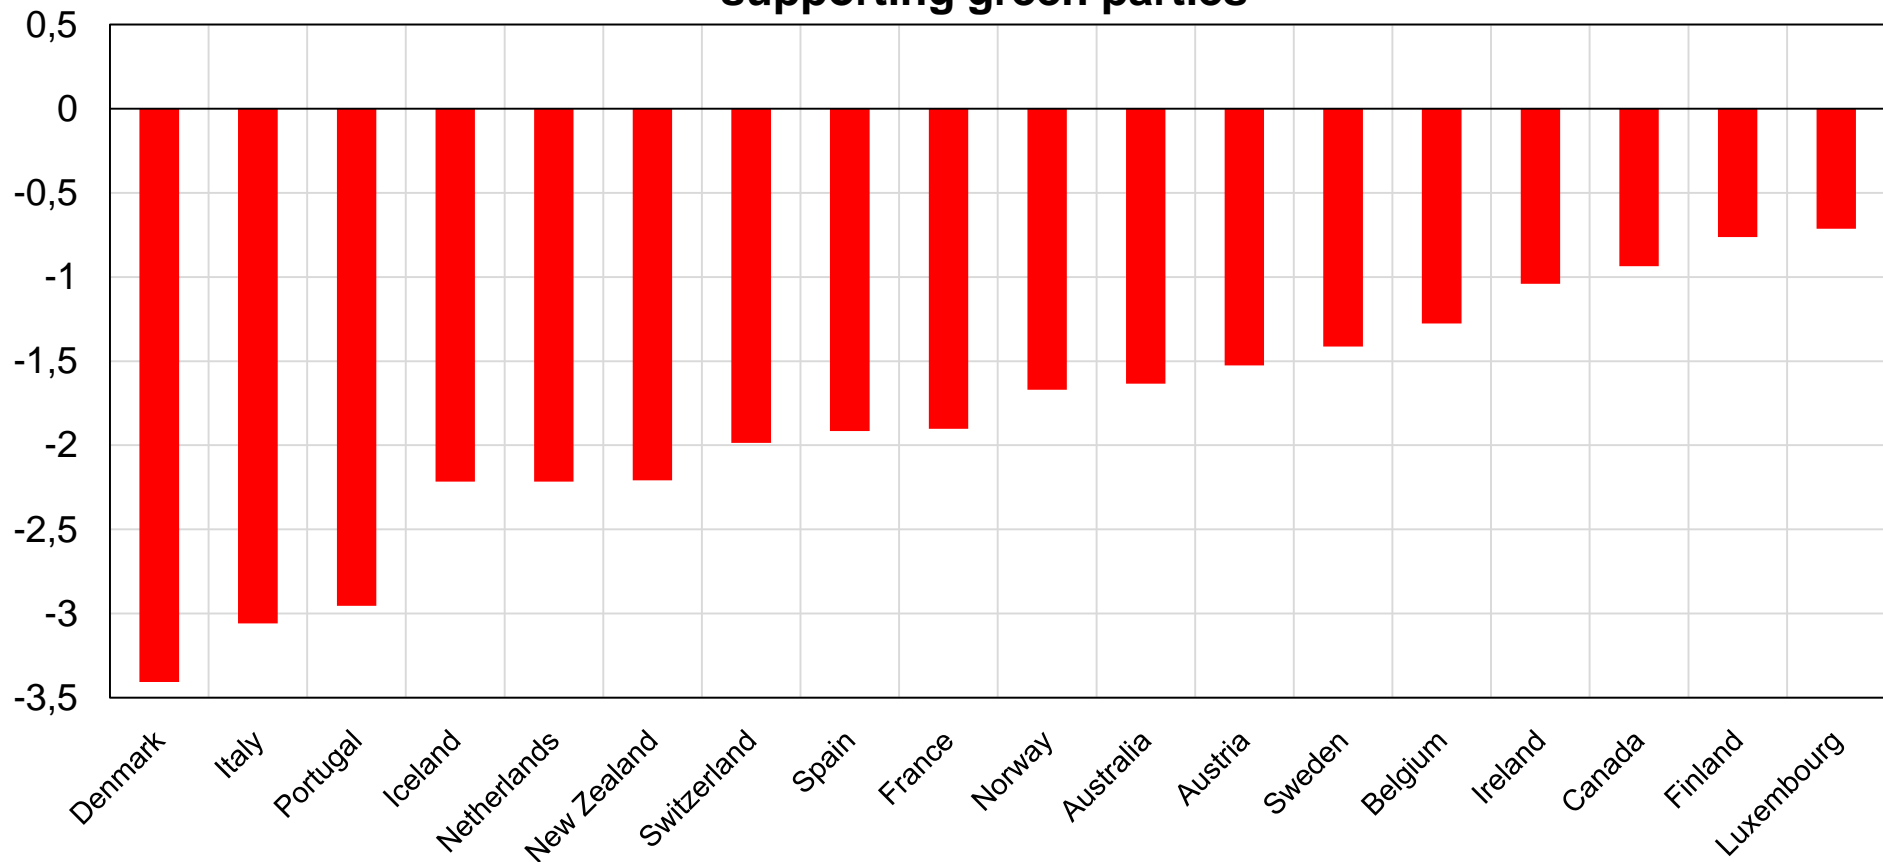

**Source:** authors' computations using the World Political Cleavages and Inequality Database.

**Note:** the figure represents the difference between the average self-declared left-right position of voters supporting green parties and the average self-declared left-right position of all voters over the 2000-2020 period by country.

**Interpretation:** In all countries, voters supporting green parties are significantly more likely to declare being more left-wing than other voters.

**Figure B22 - Average CMP left-right ideological index of Conservative / Christian Democratic / Liberal parties in Manifesto Project Database**

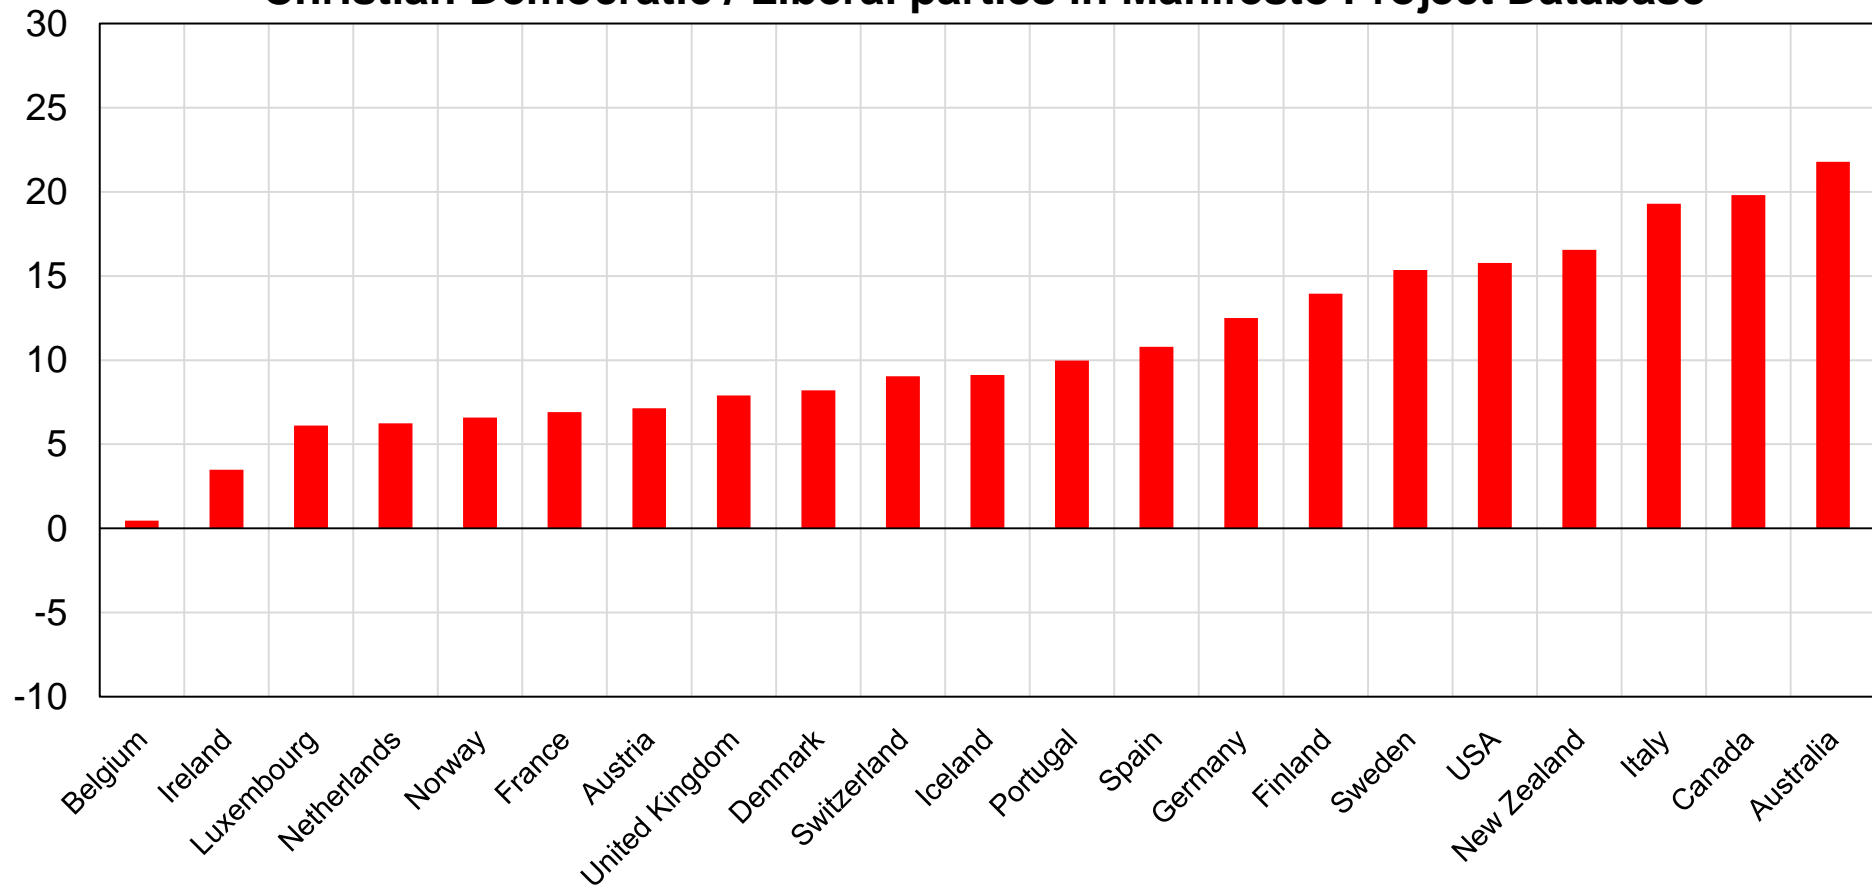

**Source:** authors' computations using the Comparative Manifesto Project Database.

**Note:** the figure represents the difference between the left-right ideological index of Conservative, Christian Democratic, and Liberal parties and the overall vote-share-weighted average of the same index (by country and election) over the 2000-2020 period by country.

**Interpretation:** In all countries, Conservative / Christian Democratic / Liberal parties have a left-right ideological index that is higher (that is, more right-wing) than that of other parties.

**Figure B23 - Average CMP left-right ideological index of anti-immigration parties**

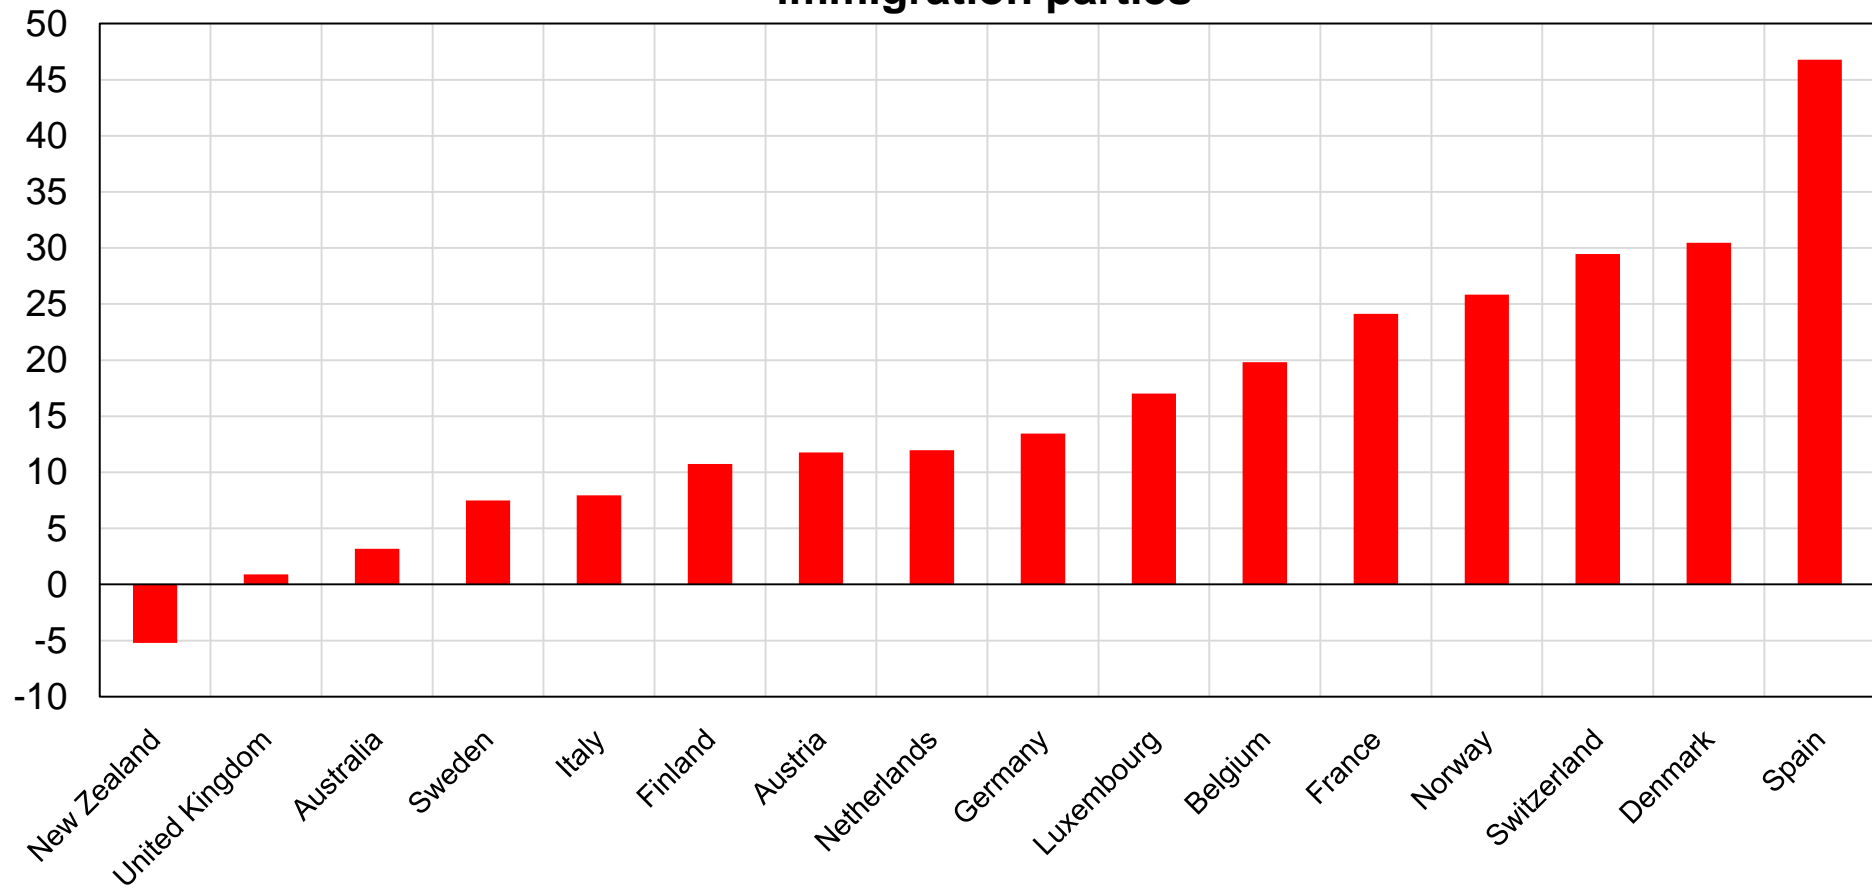

**Source:** authors' computations using the Comparative Manifesto Project Database.

**Note:** the figure represents the difference between the left-right ideological index of anti-immigration parties and the vote-share-weighted average of the same index (by country and election) over the 2000-2020 period by country.

**Interpretation:** In nearly all countries, anti-immigration parties have a left-right ideological index that is higher (that is, more right-wing) than that of other parties.

**Figure B24 - Average CMP left-right ideological index of Social Democratic / Socialist / Communist / Other left-wing parties (excl. Greens)**

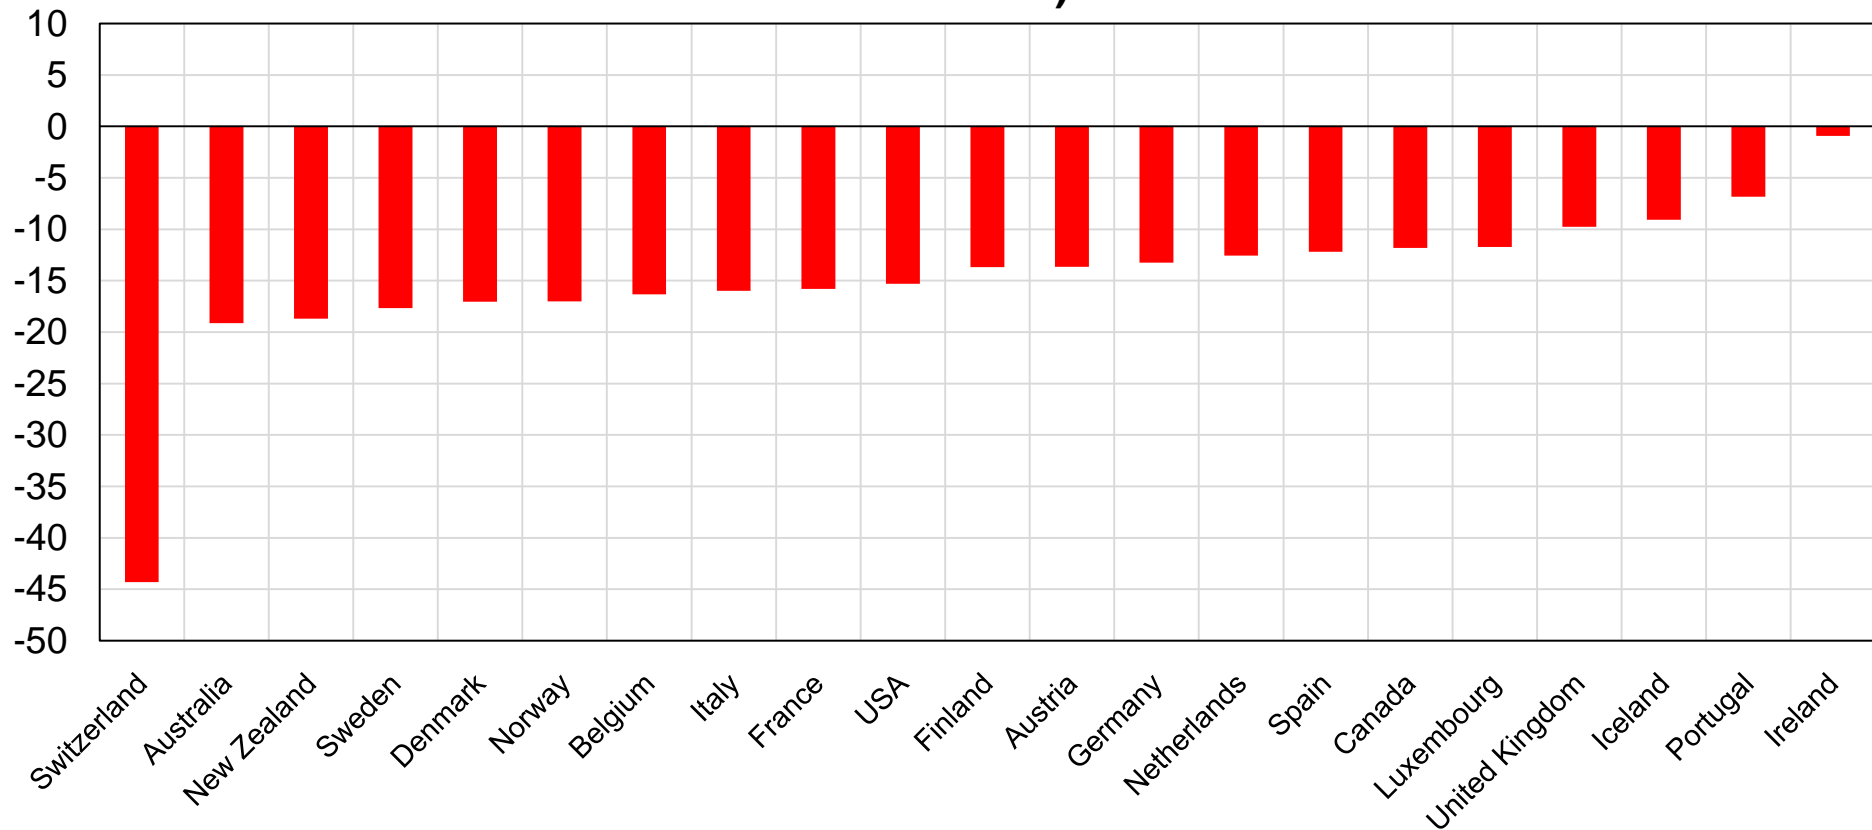

**Source:** authors' computations using the Comparative Manifesto Project Database.

**Note:** the figure represents the difference between the left-right ideological index of Social Democratic, Socialist, Communist and other left-wing parties (excluding Greens) and the vote-share-weighted average of the same index (by country and election) over the 2000-2020 period by country.

**Interpretation:** In all countries, Social Democratic / Socialist / Communist / Other left-wing parties parties have a left-right ideological index that is lower (that is, more left-wing) than that of other parties.

**Figure B25 - Average CMP left-right ideological index of green parties**

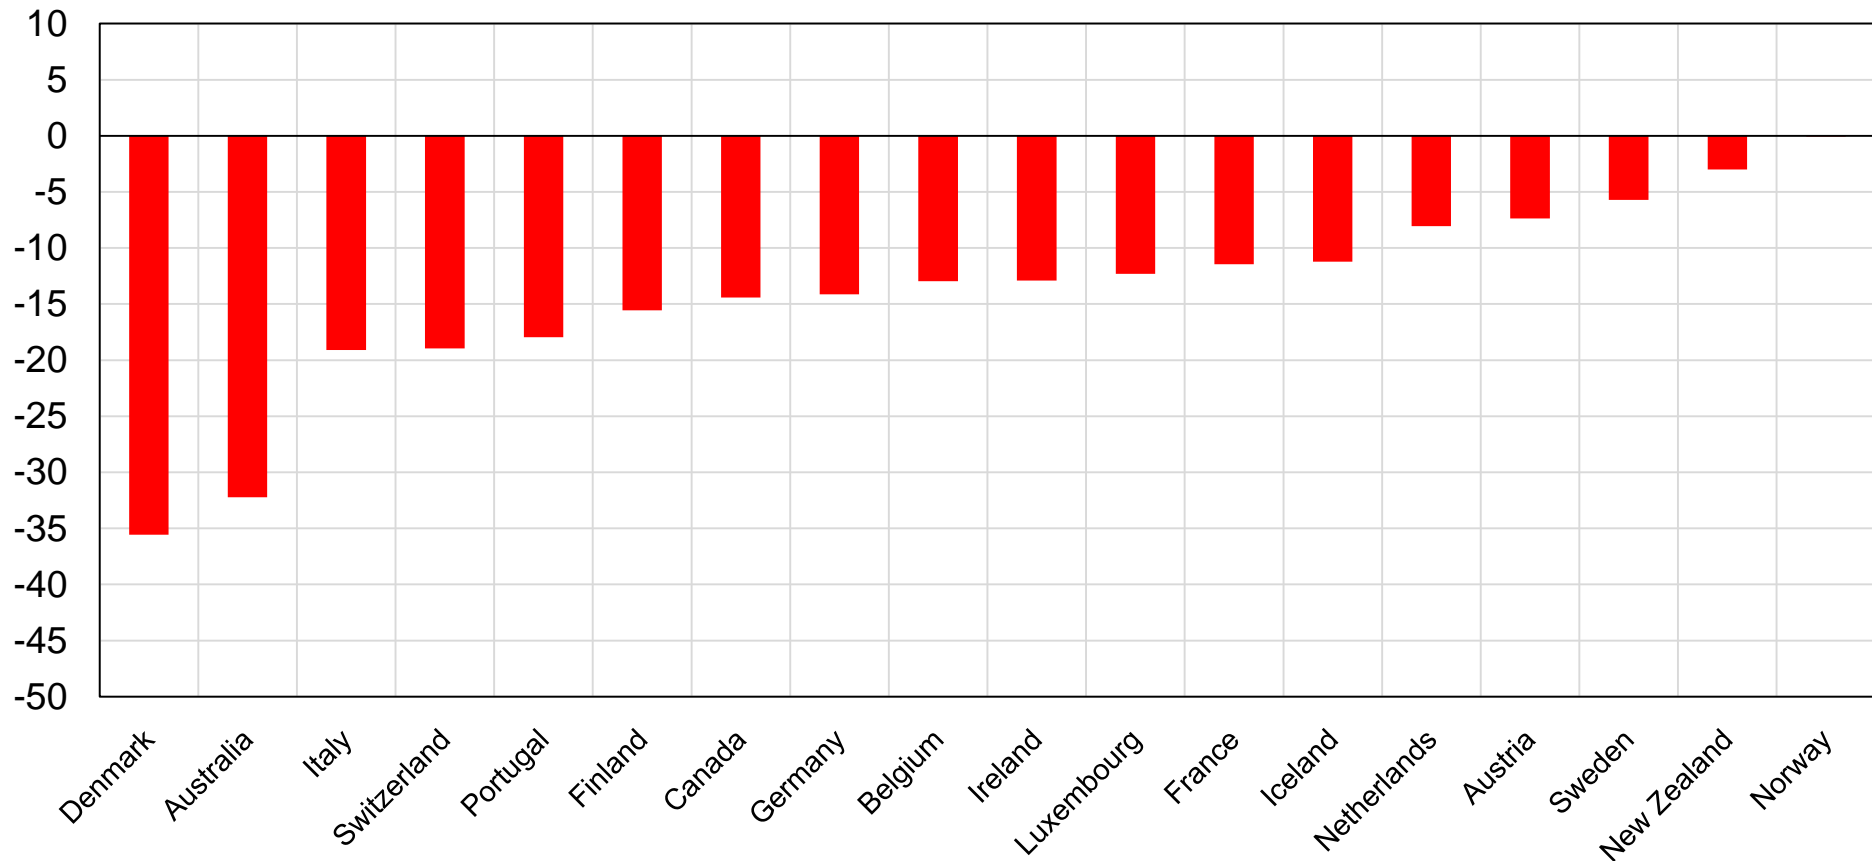

**Source:** authors' computations using the Comparative Manifesto Project Database.

**Note:** the figure represents the difference between the left-right ideological index of green parties and the vote-share-weighted average of the same index (by country and election) over the 2000-2020 period by country.

**Interpretation:** In all countries, green parties have a left-right ideological index that is lower (that is, more left-wing) than that of other parties.

**Figure CA1 - Vote for left-wing parties among young voters in Western democracies**

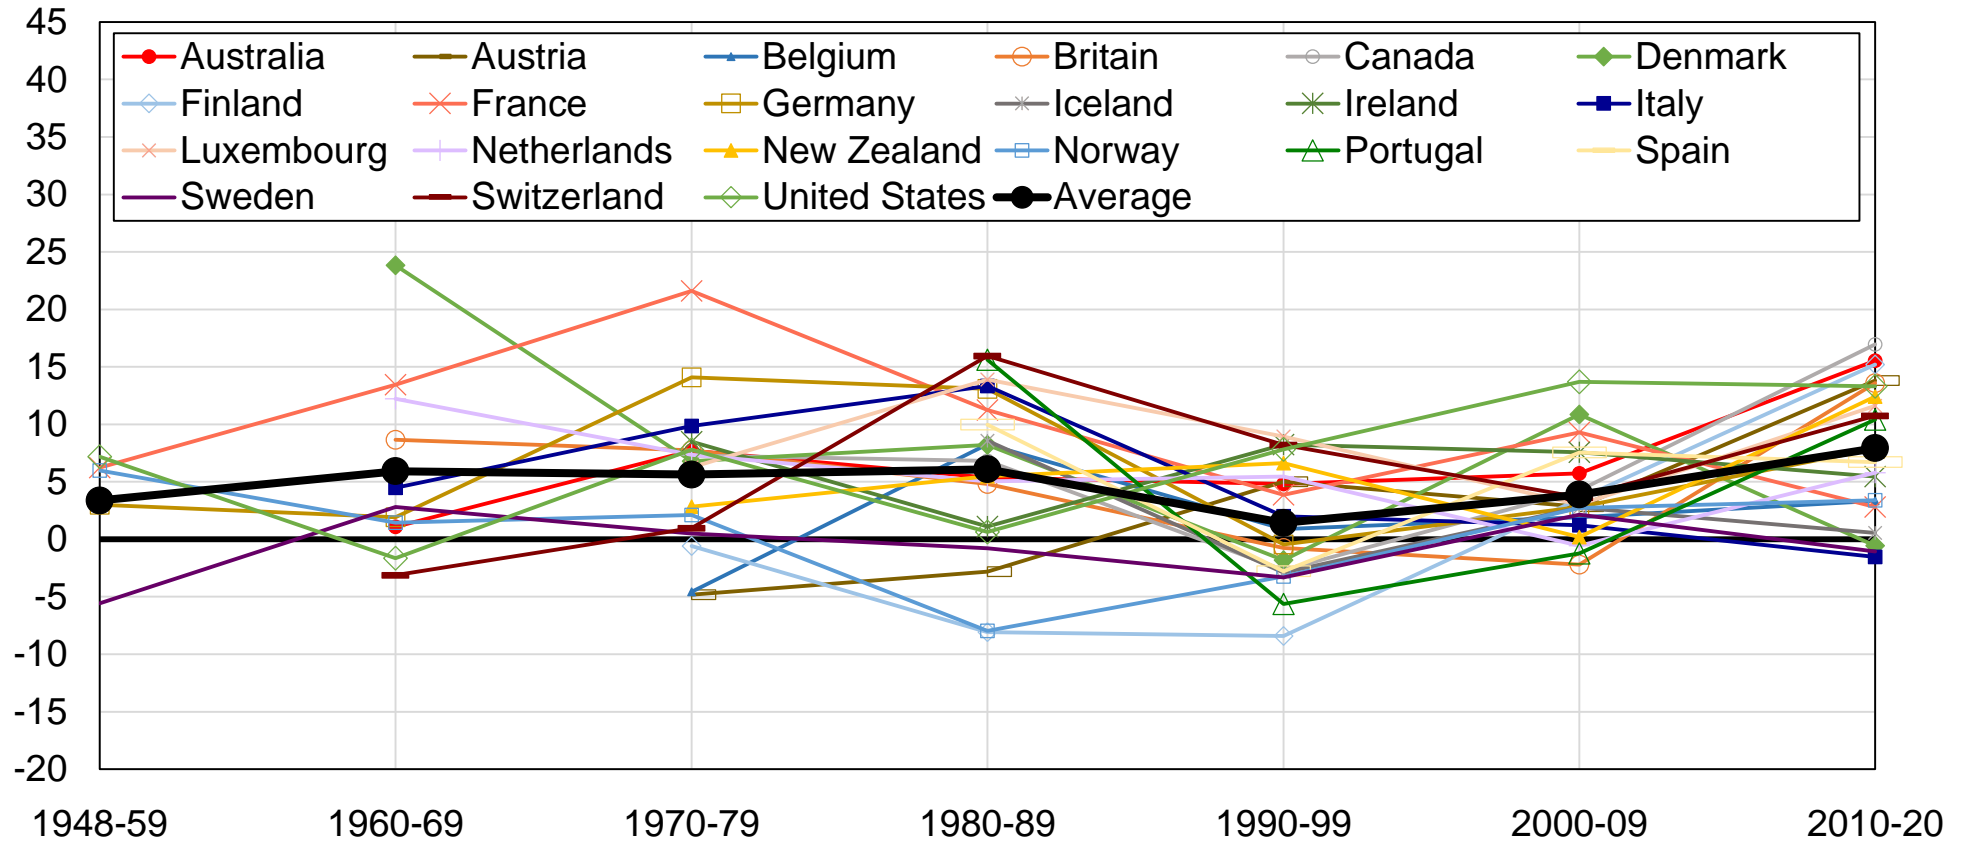

**Source:** authors' computations using the World Political Cleavages and Inequality Database.

**Note:** the figure shows the difference between the share of voters younger than 25 and the share of voters aged 25 or above voting for left-wing parties in Western democracies.



**Figure CA2 - Vote for left-wing parties among old voters in Western democracies**

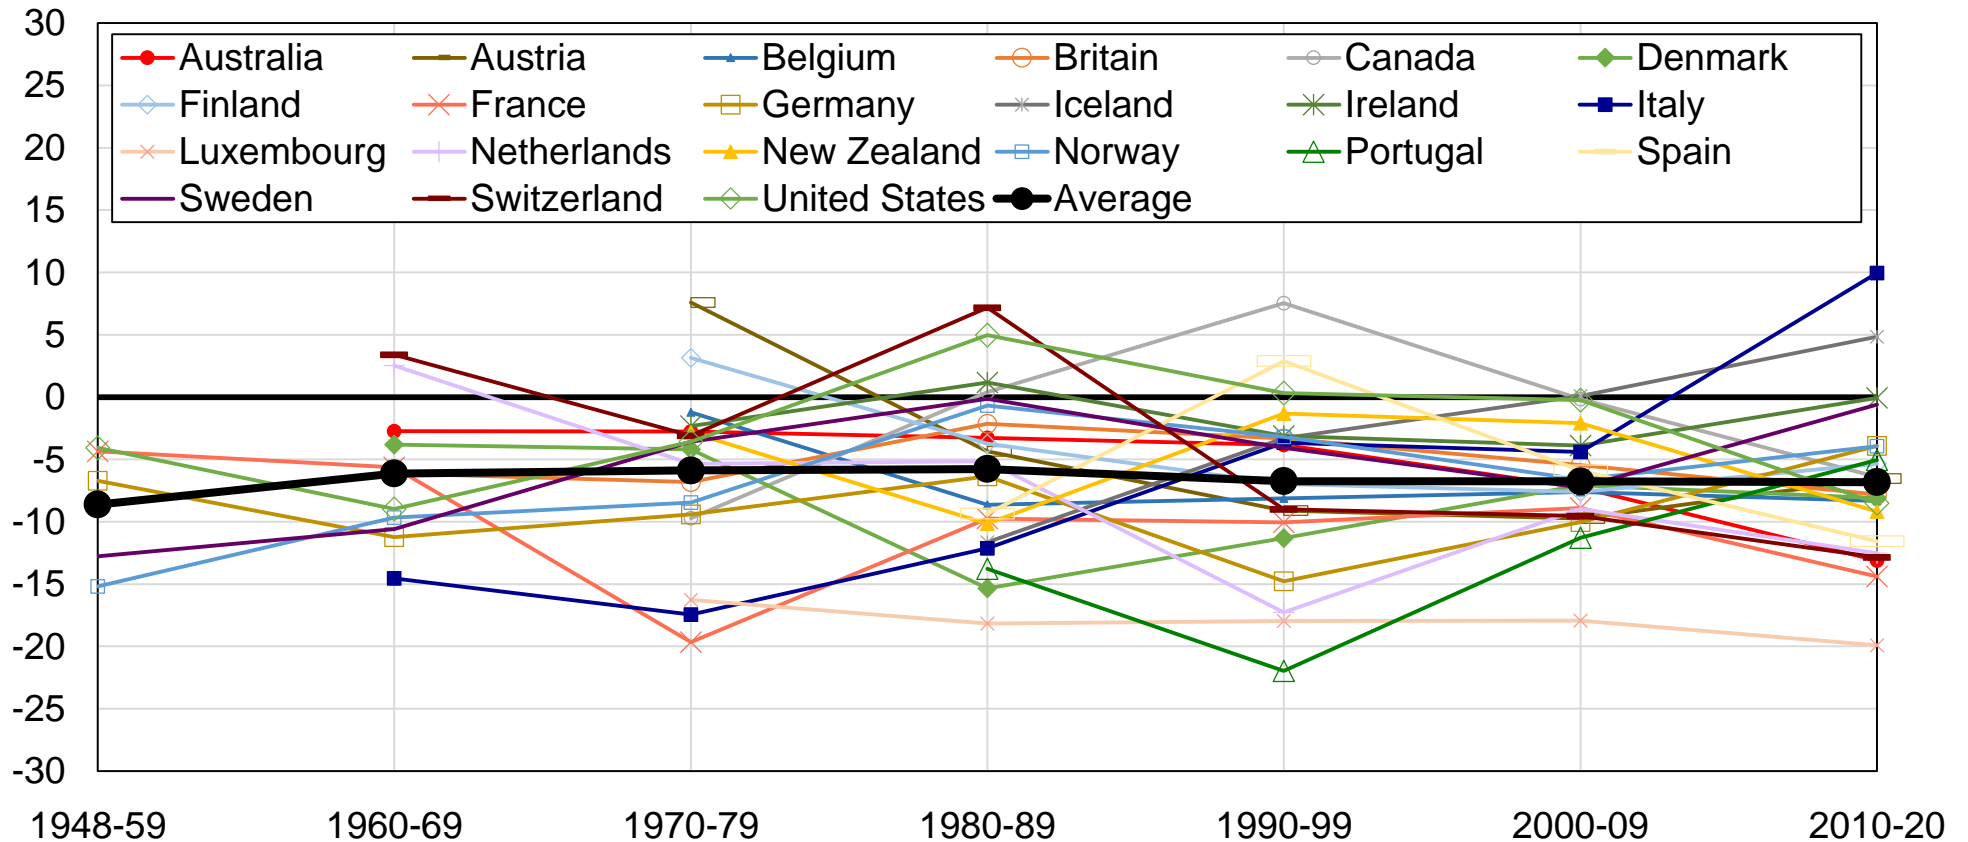

**Source:** authors' computations using the World Political Cleavages and Inequality Database.

**Note:** the figure shows the difference between the share of the 10% oldest voters and the share of the youngest 90% voters voting for left-wing parties in Western democracies.

**Figure CA3 - Vote for left-wing parties among young voters in Western democracies, after controls**

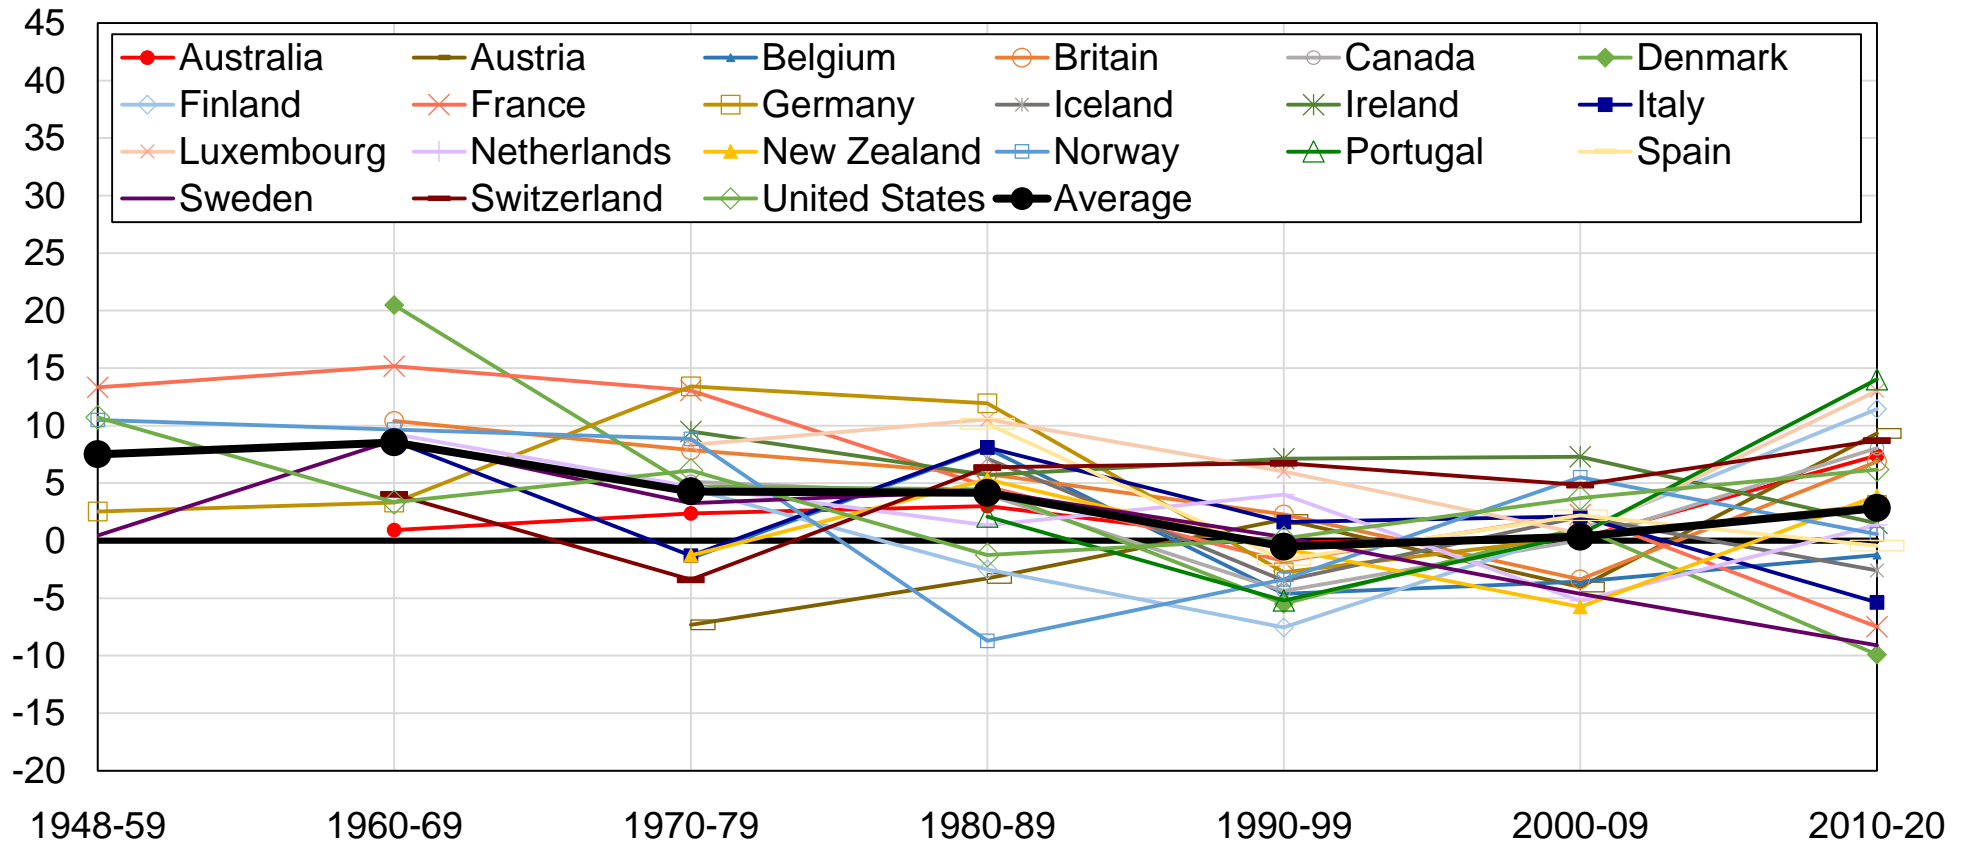

**Source:** authors' computations using the World Political Cleavages and Inequality Database.

**Note:** the figure shows the difference between the share of voters younger than 25 and the share of voters aged 25 or above voting for left-wing parties in Western democracies, after controlling for income, education, gender, religion, church attendance, rural/urban, region, race/ethnicity, employment status, and marital status.

**Figure CA4 - Vote for left-wing parties among old voters in Western democracies, after controls**

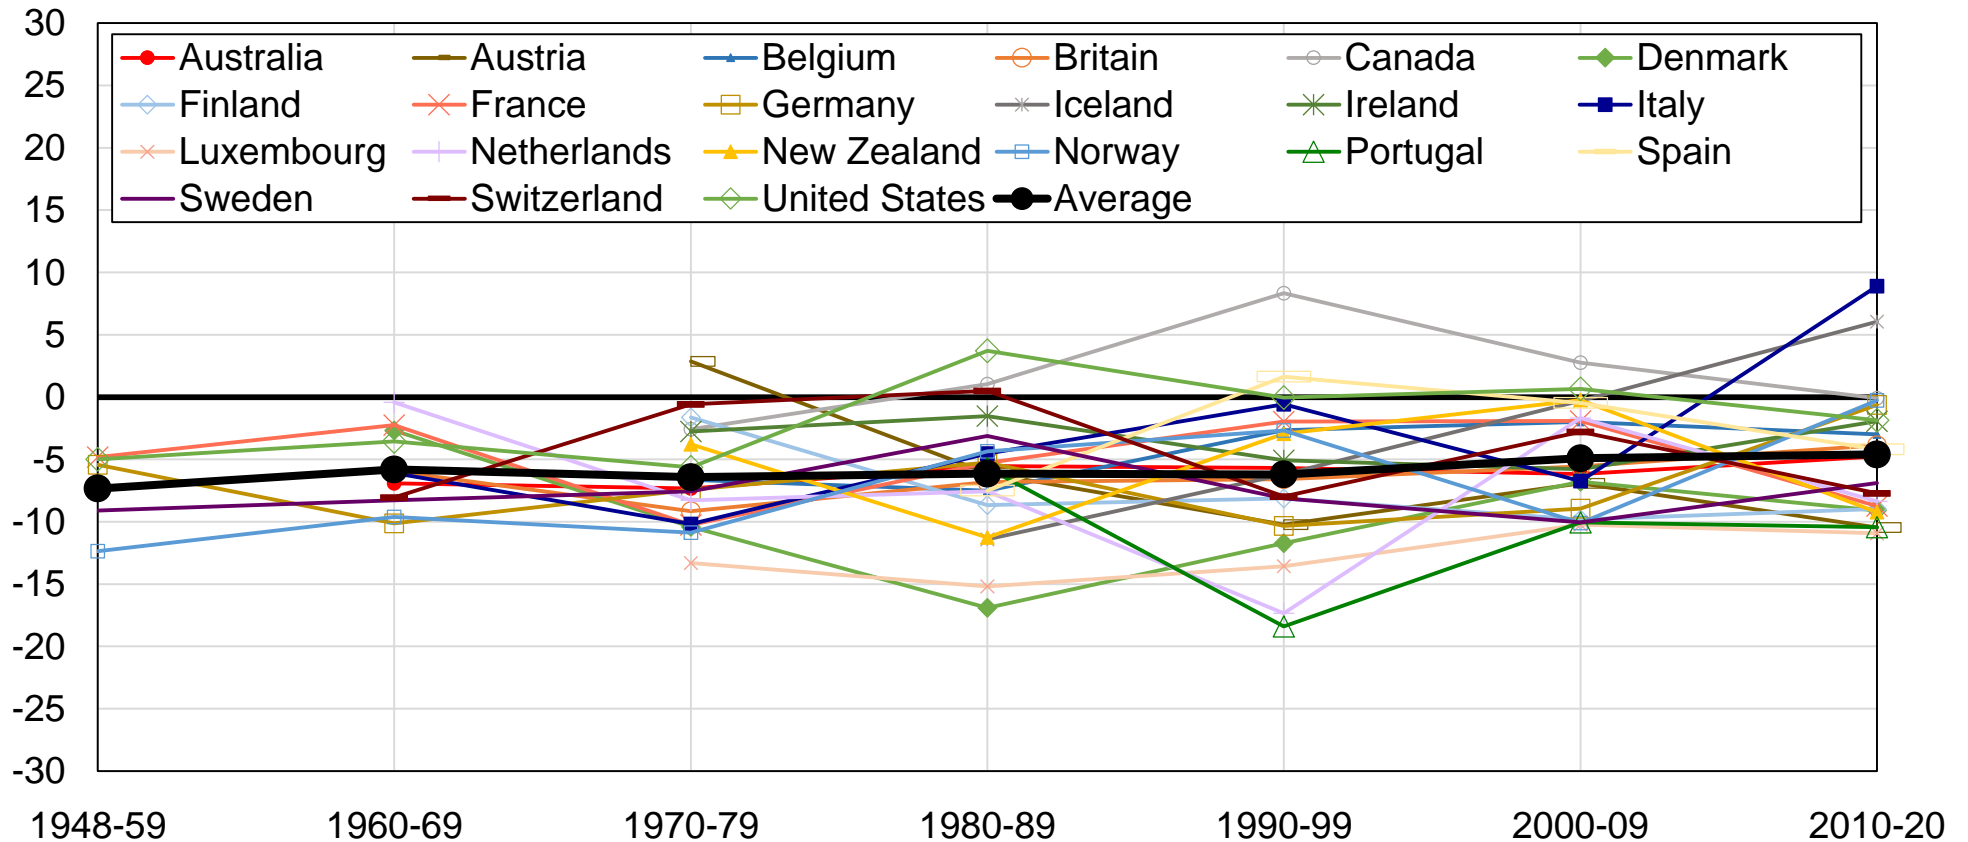

**Source:** authors' computations using the World Political Cleavages and Inequality Database.

**Note:** the figure shows the difference between the share of the 10% oldest voters and the share of the youngest 90% voters voting for left-wing parties in Western democracies, after controlling for income, education, gender, religion, church attendance, rural/urban, region, race/ethnicity, employment status, and marital status.

**Figure CA5 - Generational cleavages and party system fragmentation**

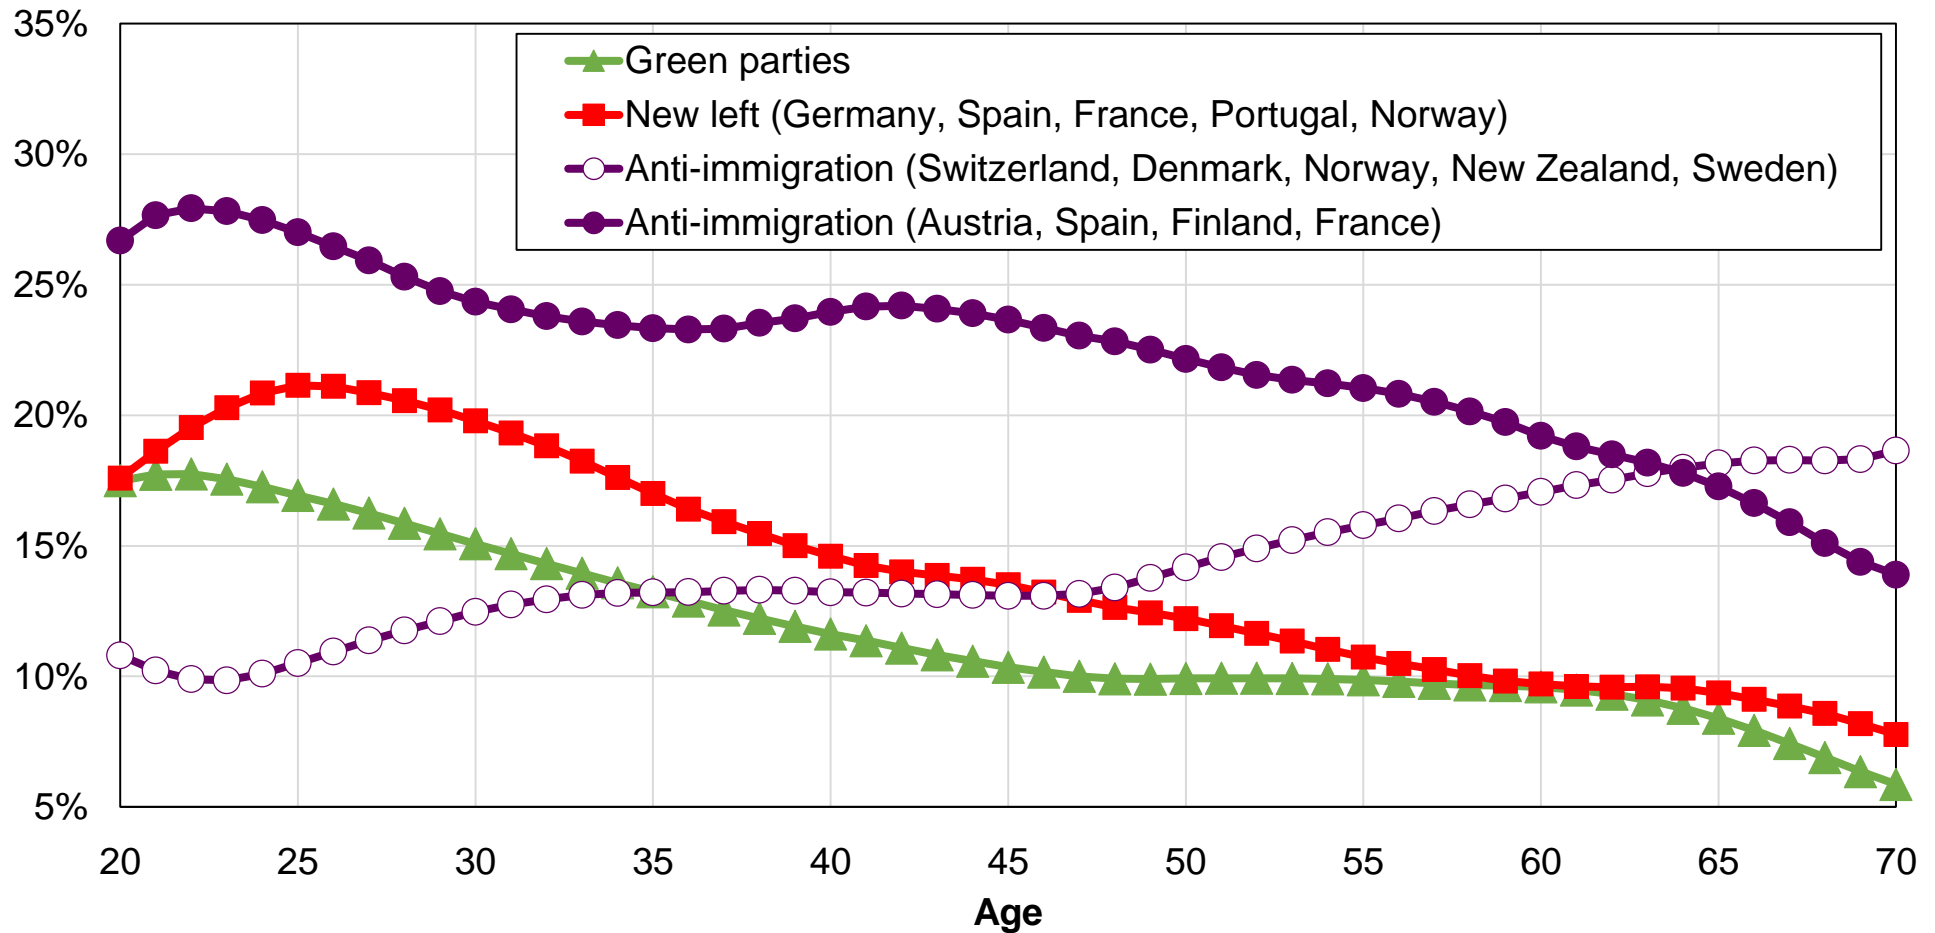

**Source:** authors' computations using the World Political Cleavages and Inequality Database.

**Note:** the figure represents the share of votes received by selected groups of parties in Western democracies by age in the last election available. Green parties and "New left" parties (Die Linke, Podemos, France Insoumise, Bloco de Esquerda, Norwegian Socialist Left Party) make much higher scores among the youth than among older generations. By contrast, there is no clear age profile in the case of far-right or anti-immigration parties. 20 corresponds to voters aged 20 or younger; 70 corresponds to voters 70 or older.

**Figure CA6 - Vote for Green parties by age group**

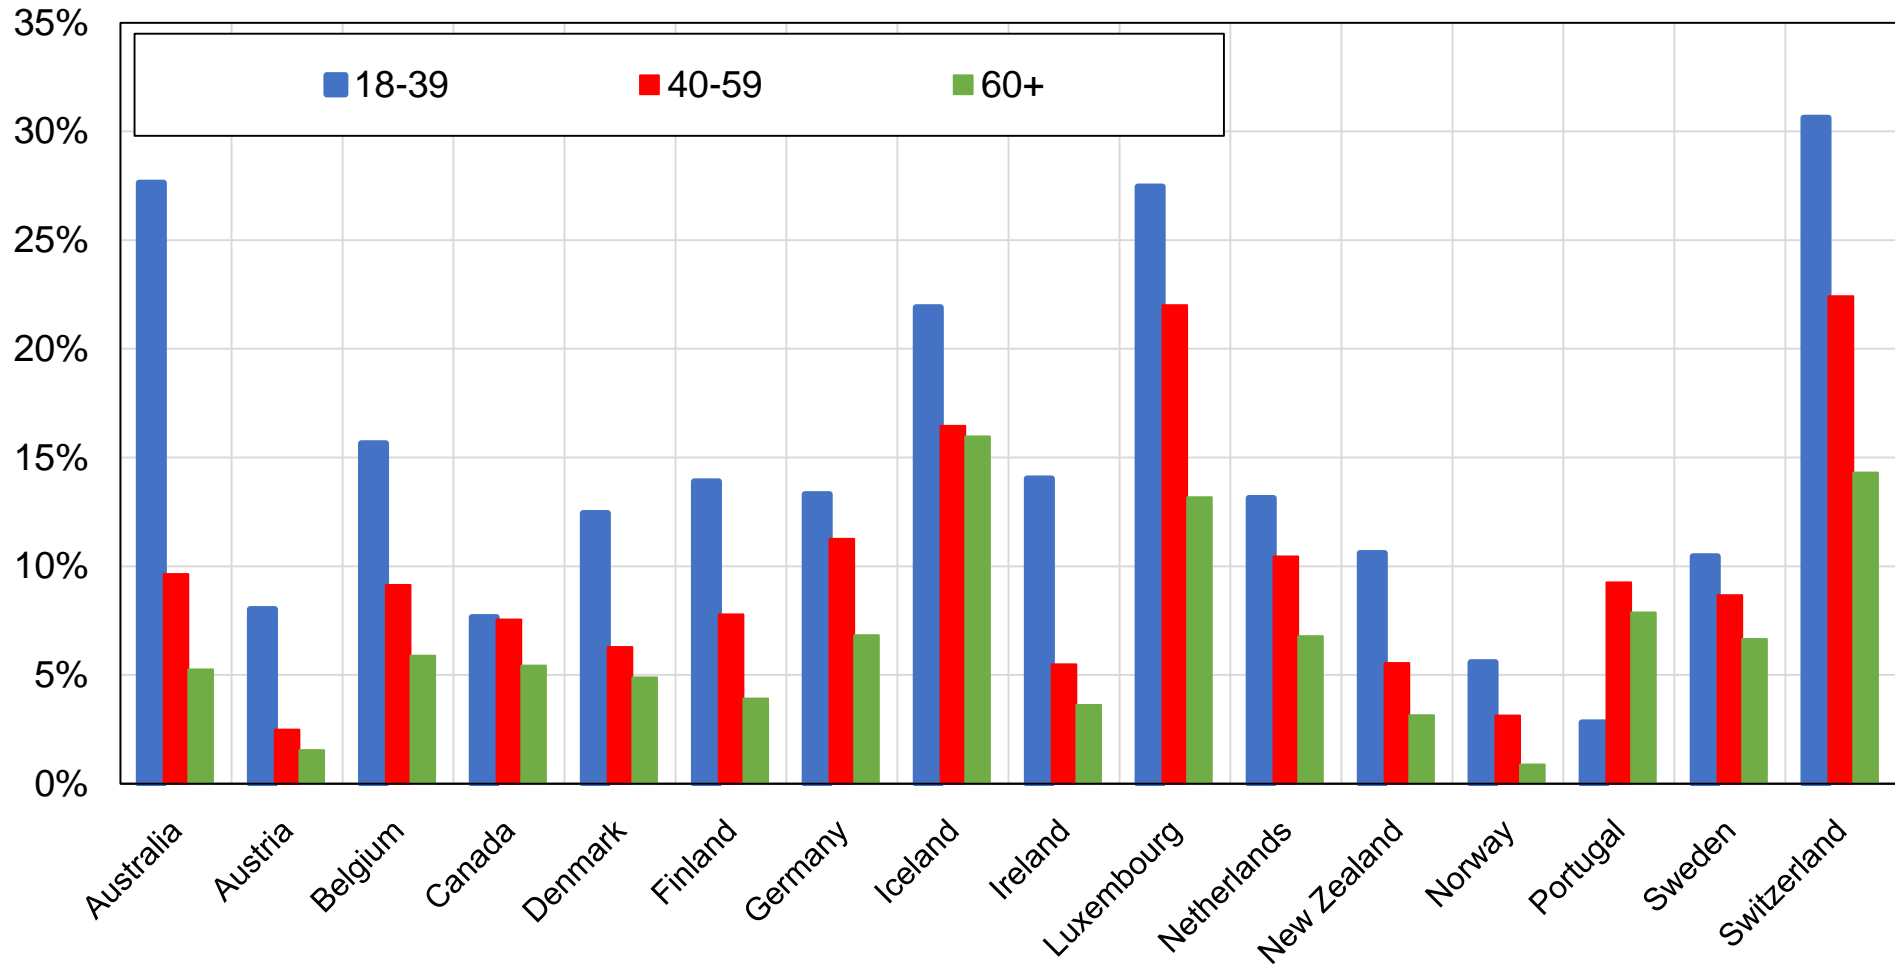

**Source:** authors' computations using the World Political Cleavages and Inequality Database.

**Note:** the figure shows the share of votes received by Green parties in Western democracies in the last election available by age group.

**Figure CA7 - Vote for anti-immigration parties by age group**

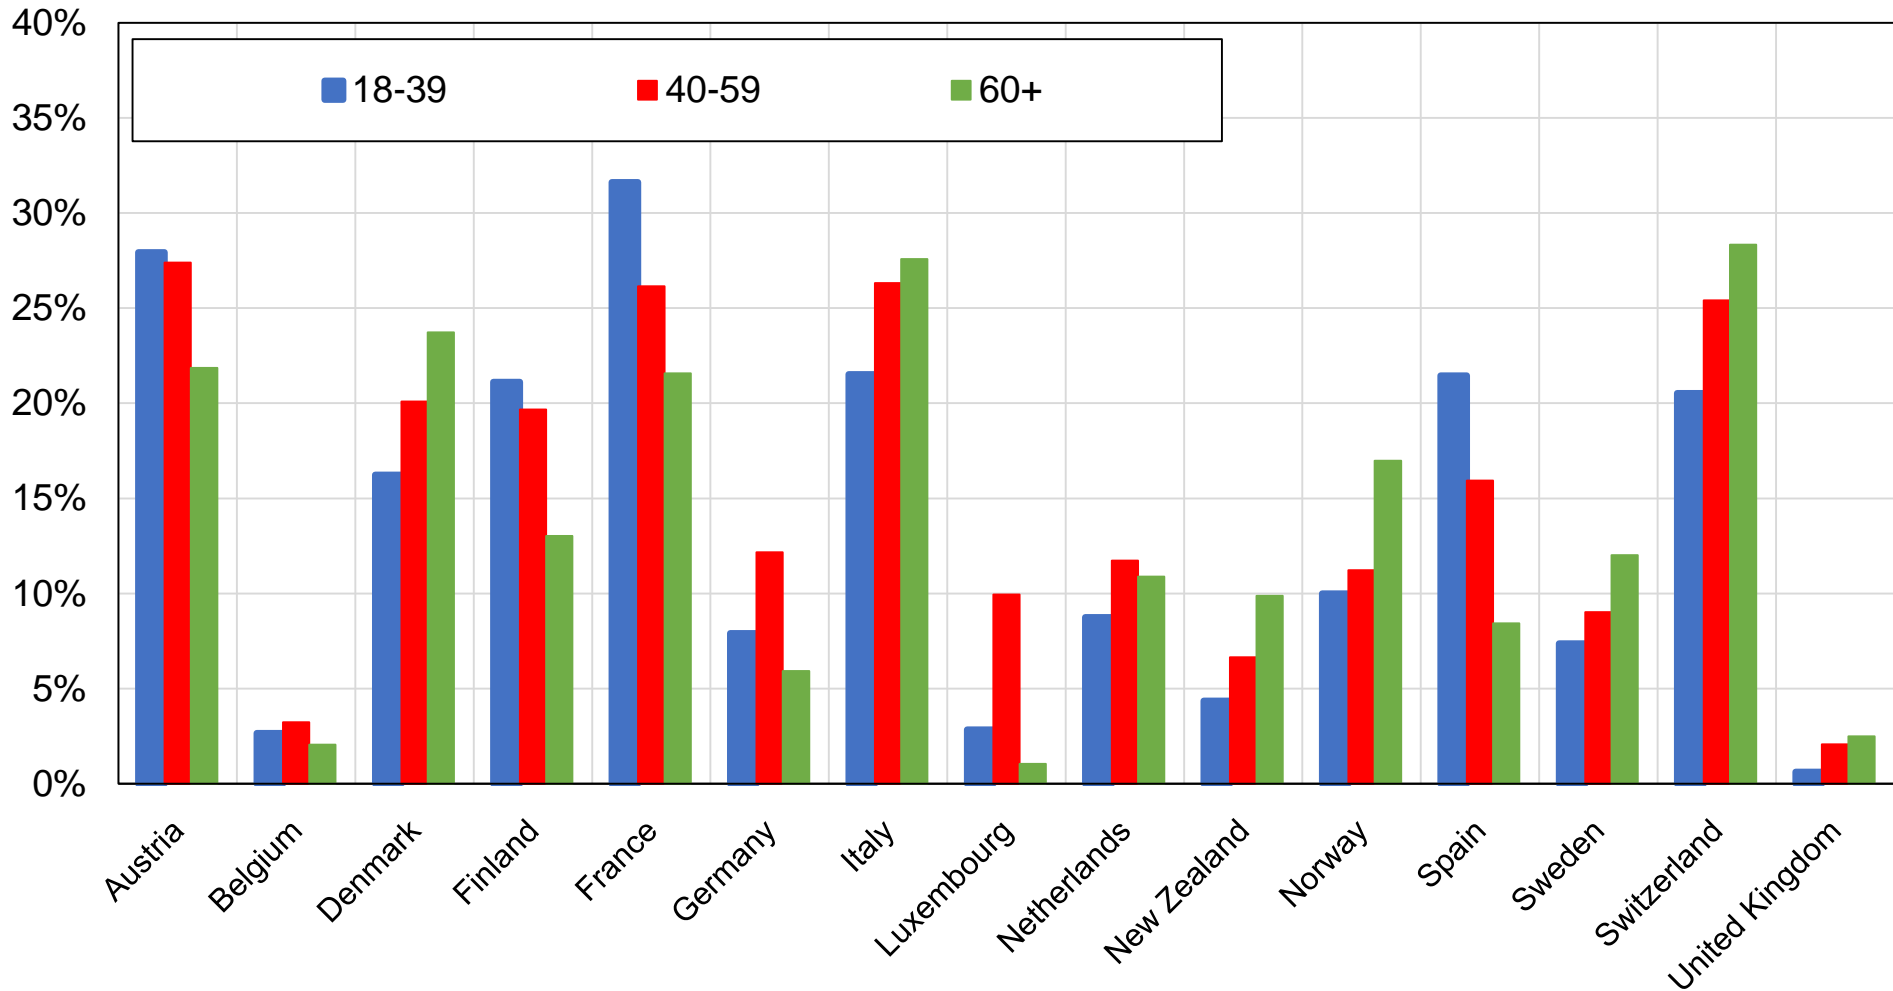

**Source:** authors' computations using the World Political Cleavages and Inequality Database.

**Note:** the figure shows the share of votes received by anti-immigration parties in Western democracies in the last election available by age group.

**Figure CB1 - The rural-urban divide**

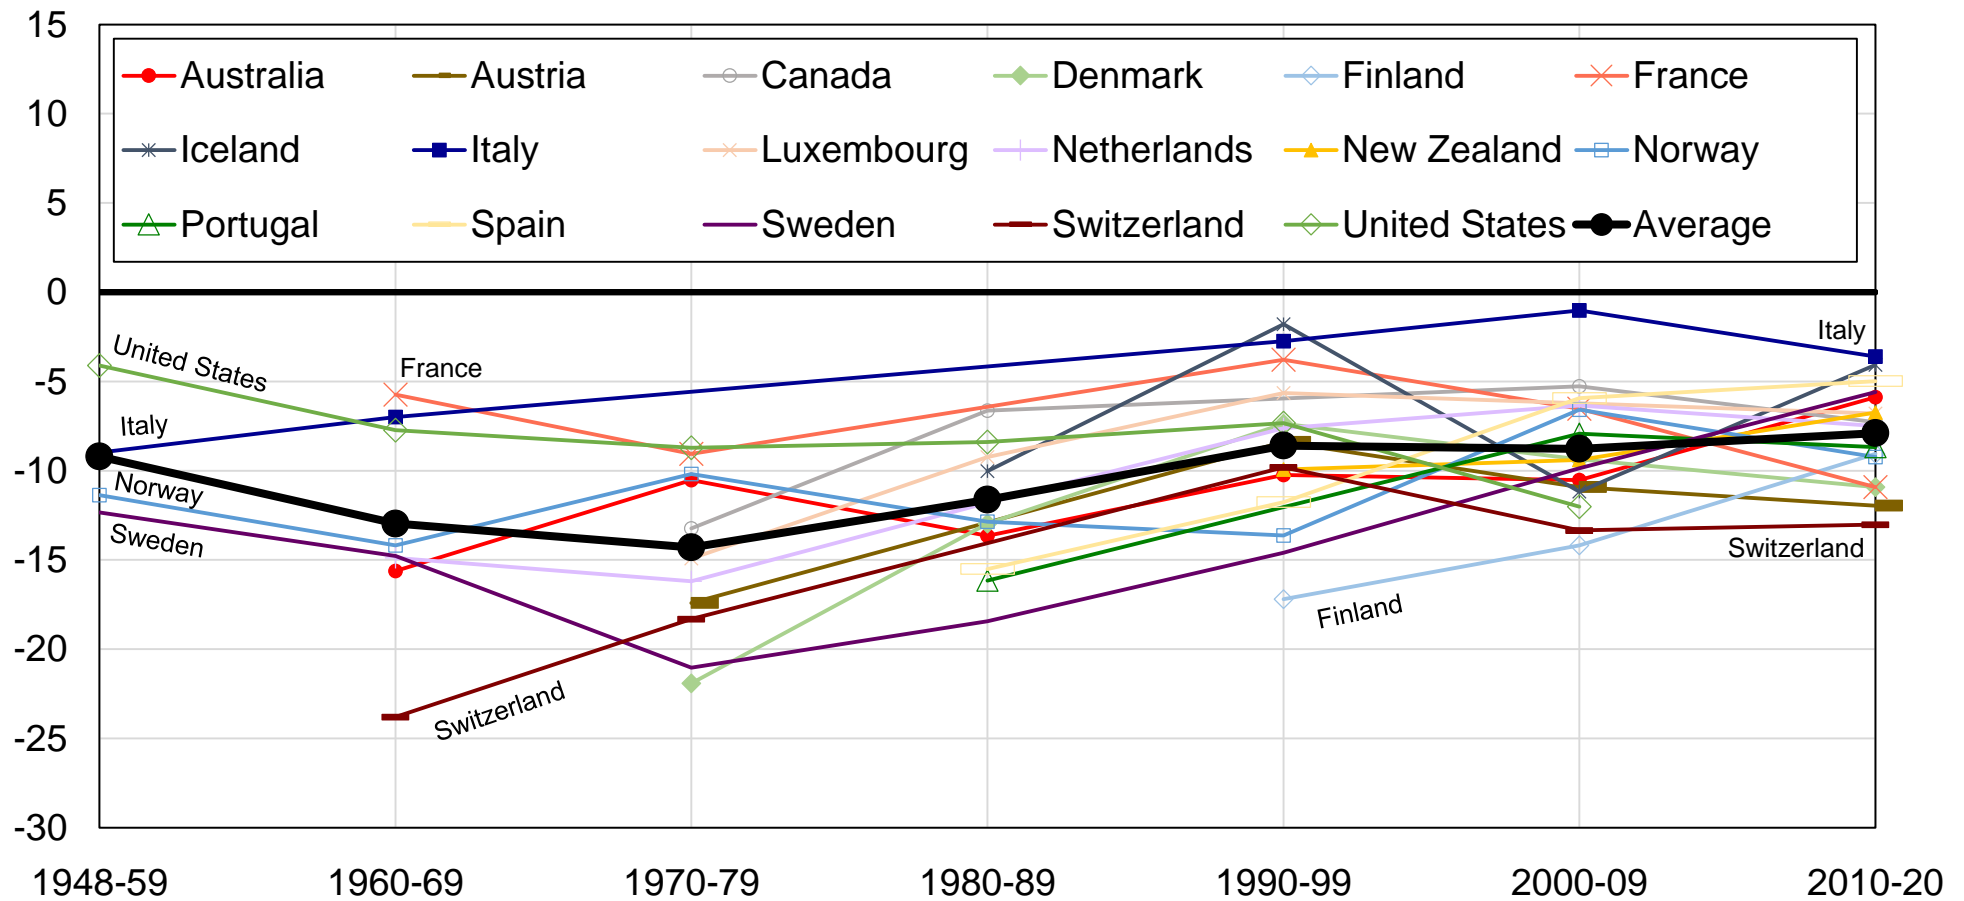

**Source:** authors' computations using the World Political Cleavages and Inequality Database.

**Note:** the figure displays the difference between the share of rural areas and the share of urban areas voting for social democratic / socialist / communist / green parties. In all countries, rural areas have remained significantly less likely to vote for these parties than cities, with no clear trend over time. Estimates control for income, education, age, gender, employment status, and marital status (in country-years for which these variables are available).

**Figure CB2 - Vote for Green parties by rural-urban location in Western democracies**

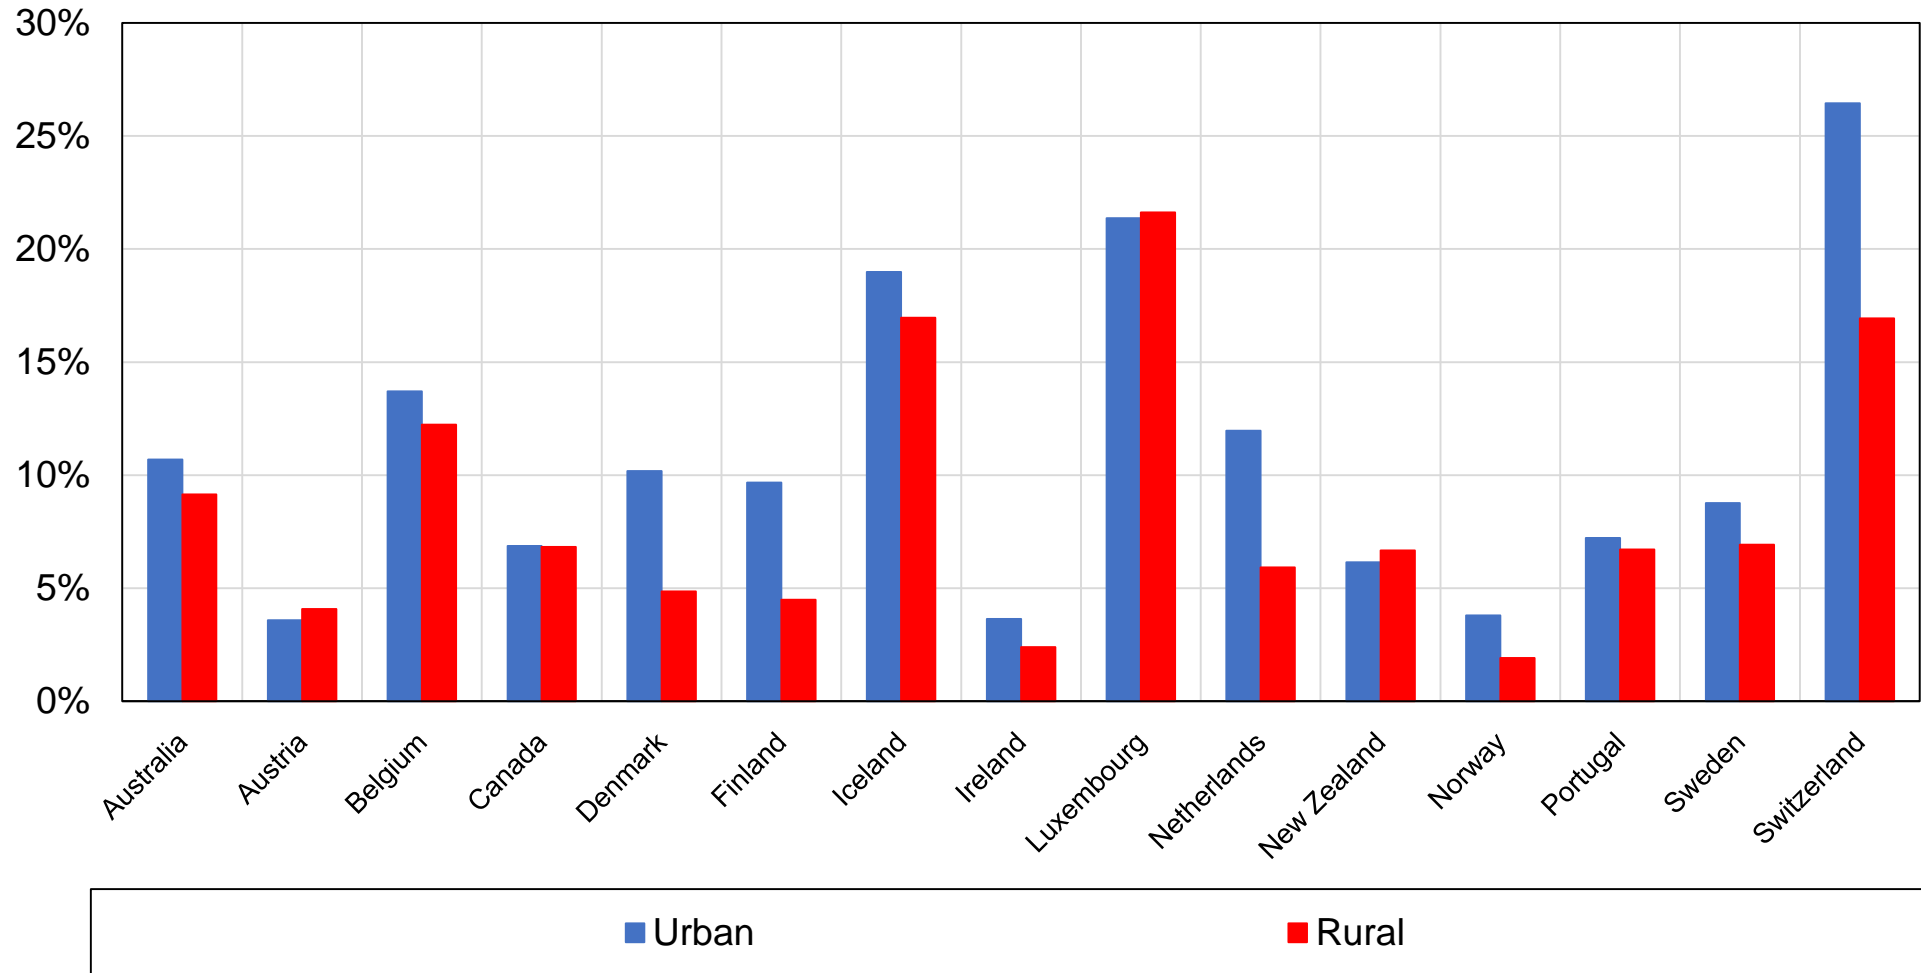

**Source:** authors' computations using the World Political Cleavages and Inequality Database.

**Note:** the figure shows the share of votes received by Green parties by rural-urban location in Western democracies.



**Figure CB3 - Vote for anti-immigration parties by rural-urban location in Western democracies**

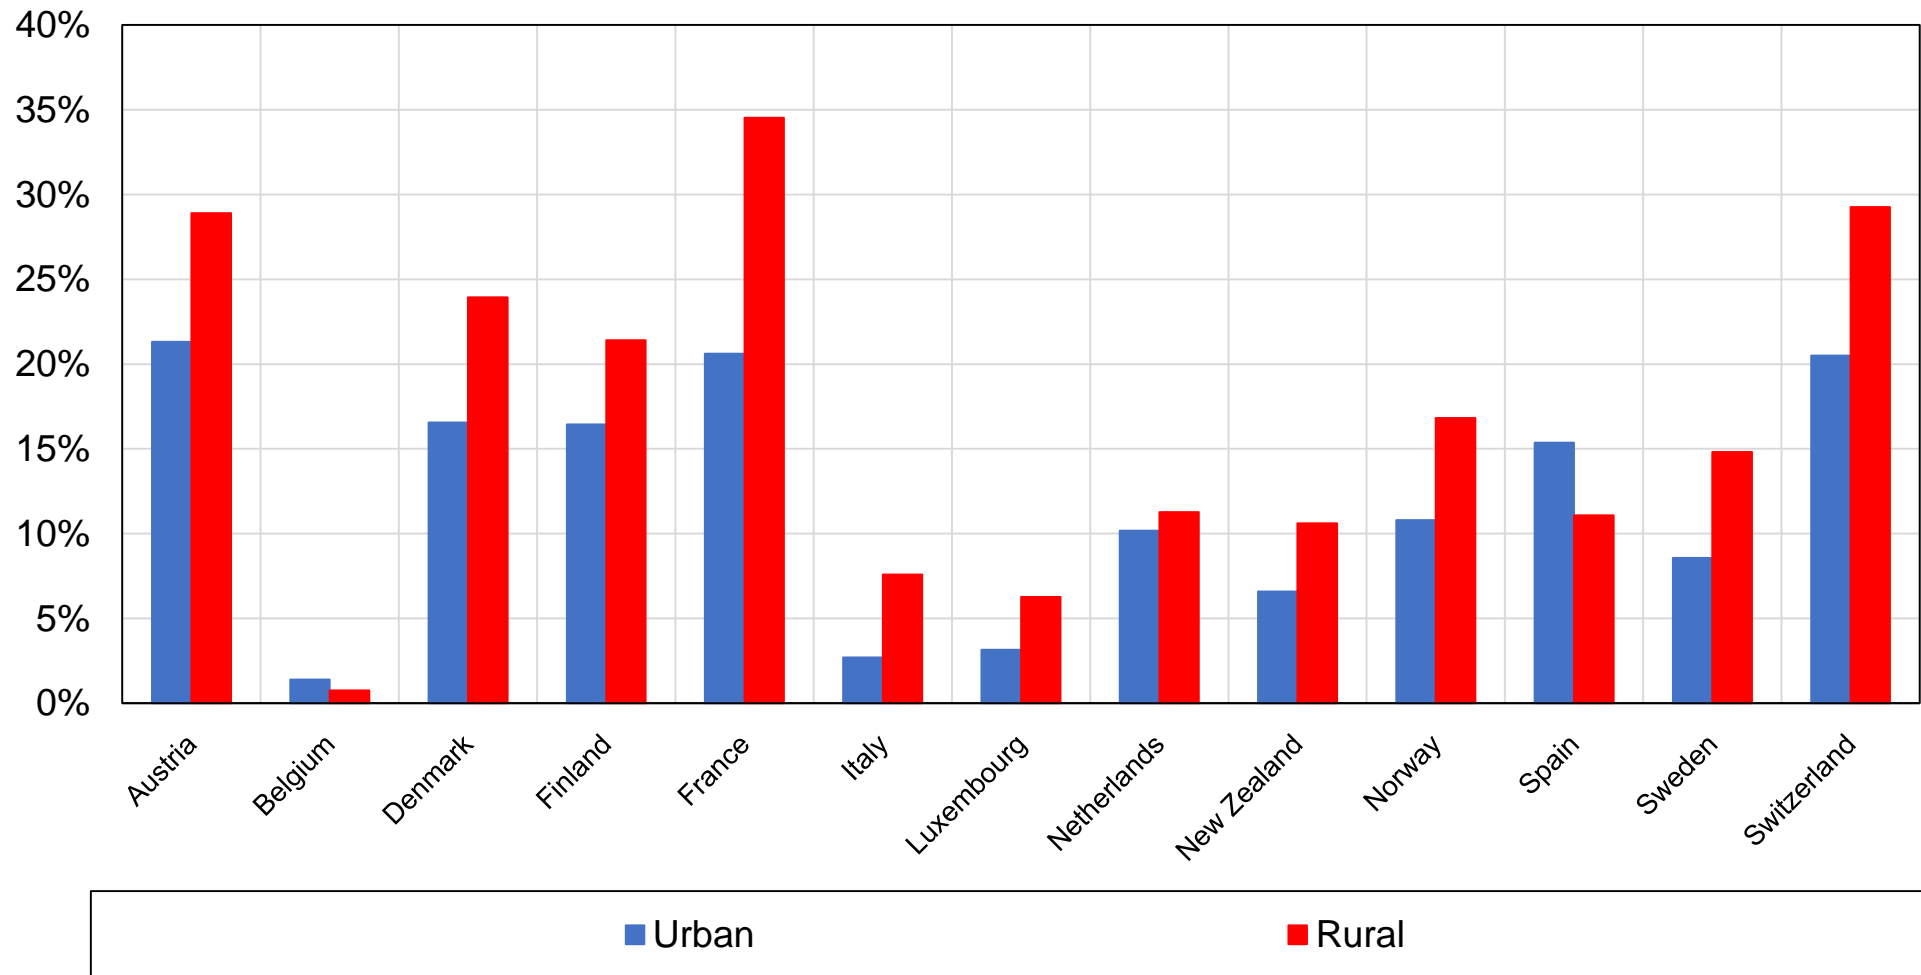

**Source:** authors' computations using the World Political Cleavages and Inequality Database.

**Note:** the figure shows the share of votes received by anti-immigration parties by rural-urban location in Western democracies.

**Figure CB4 - Vote for left-wing parties by center-periphery location in Western democracies**

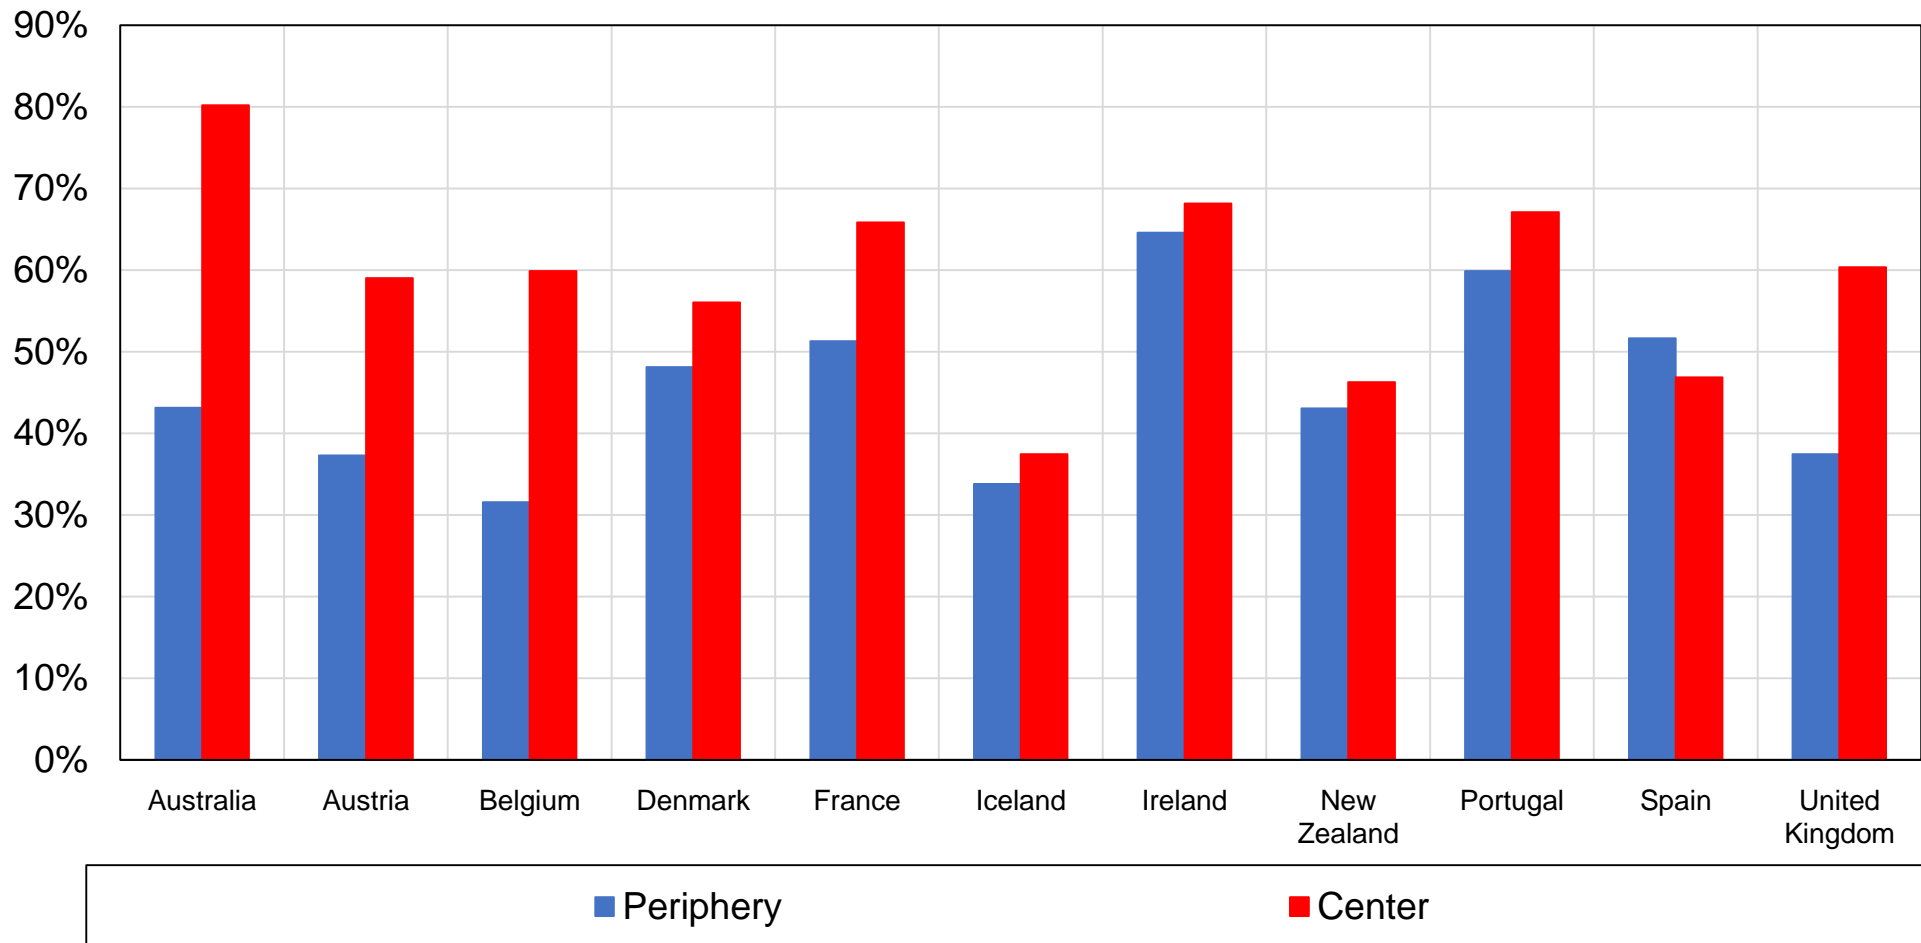

**Source:** authors' computations using the World Political Cleavages and Inequality Database.

**Note:** the figure shows the share of votes received by left-wing parties by center-periphery location in Western democracies. Centers correspond to the Australian Capital Territory (Australia), Vienna (Austria), Brussels (Belgium), Copenhagen (Denmark), Paris (France), Reykjavík (Iceland), Dublin (Ireland), Auckland and Wellington (New Zealand), Lisbon (Portugal), Madrid (Spain), and London (United Kingdom).

**Figure CB5 - Vote for Green parties by center-periphery location in Western democracies**

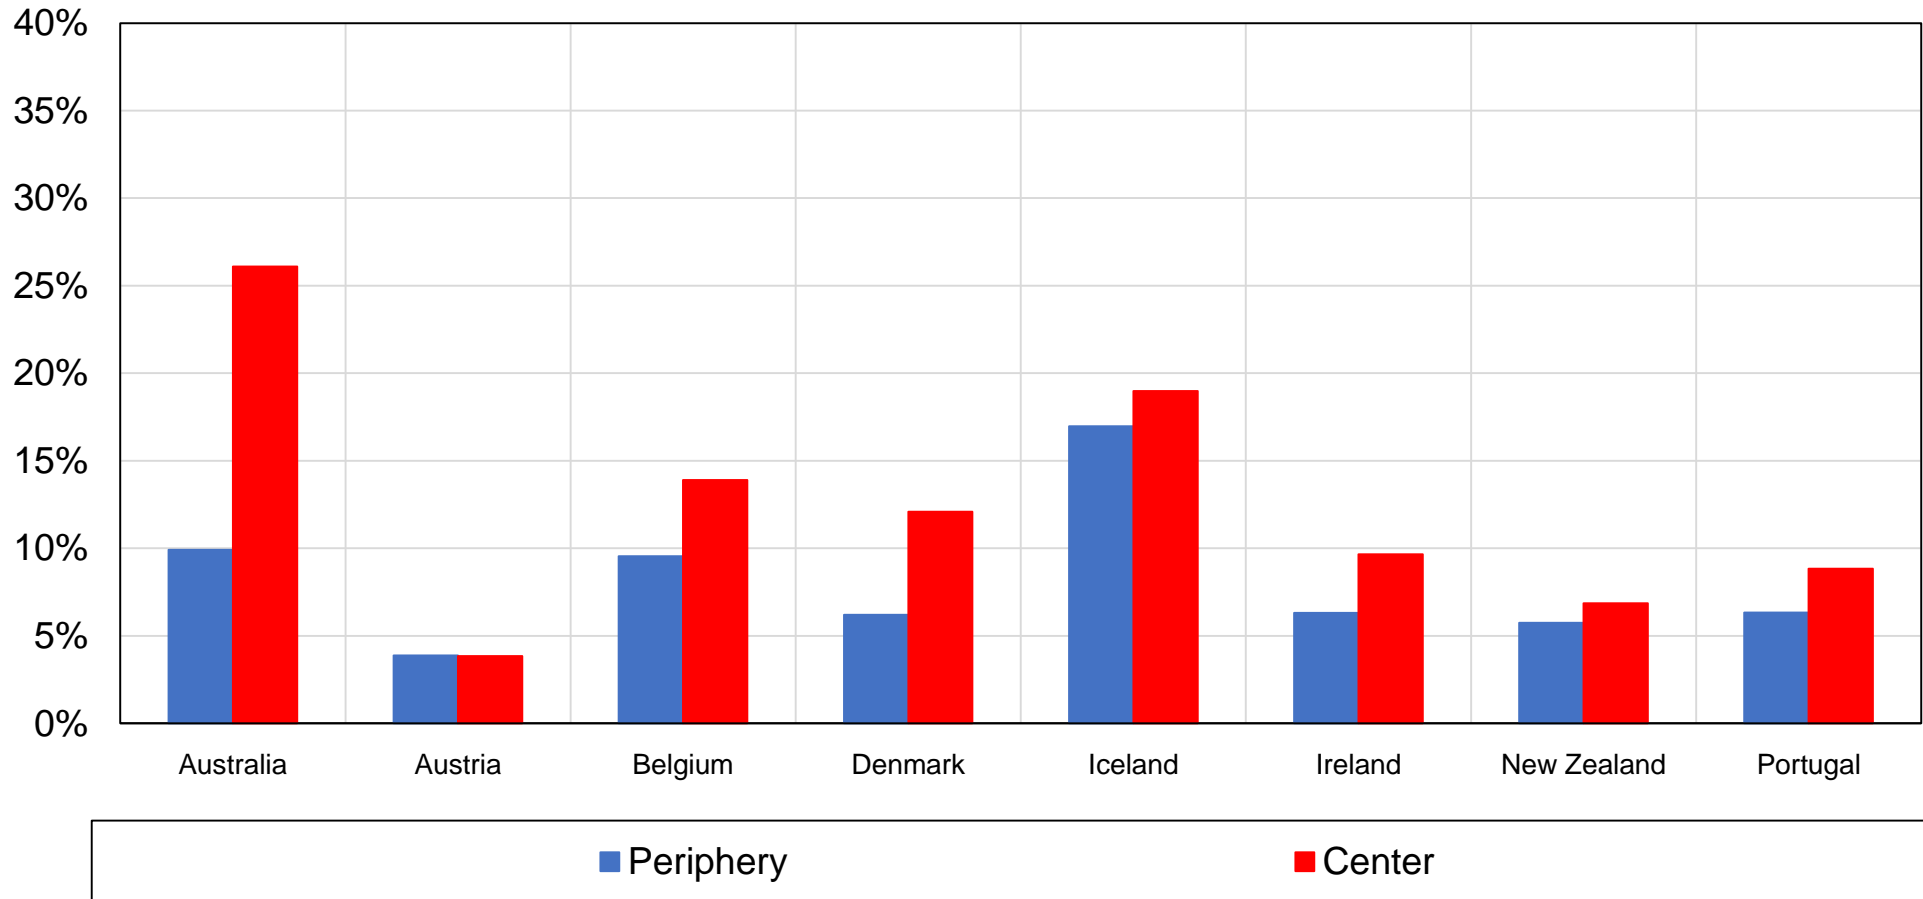

**Source:** authors' computations using the World Political Cleavages and Inequality Database.

**Note:** the figure shows the share of votes received by Green parties by center-periphery location in Western democracies. Centers correspond to the Australian Capital Territory (Australia), Vienna (Austria), Brussels (Belgium), Copenhagen (Denmark), Paris (France), Reykjavík (Iceland), Dublin (Ireland), Auckland and Wellington (New Zealand), Lisbon (Portugal), Madrid (Spain), and London (United Kingdom).

**Figure CB6 - Vote for anti-immigration parties by center-periphery location in Western democracies**

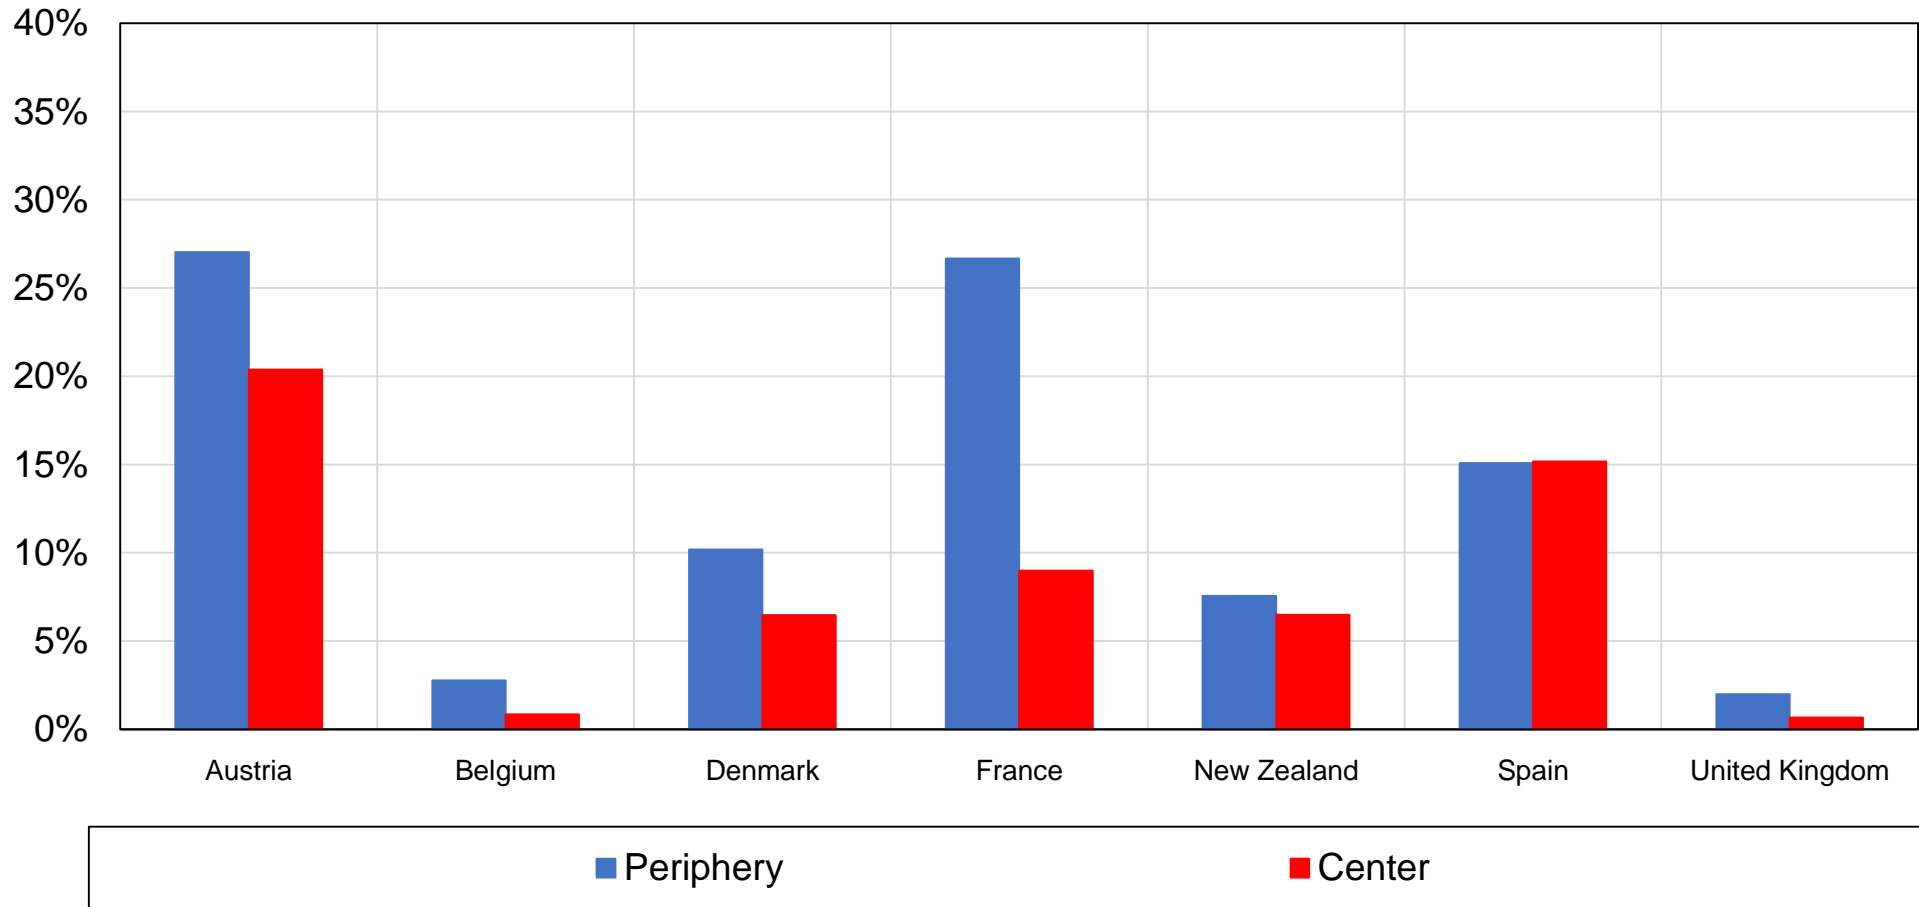

**Source:** authors' computations using the World Political Cleavages and Inequality Database.

**Note:** the figure shows the share of votes received by anti-immigration parties by center-periphery location in Western democracies. Centers correspond to the Australian Capital Territory (Australia), Vienna (Austria), Brussels (Belgium), Copenhagen (Denmark), Paris (France), Reykjavík (Iceland), Dublin (Ireland), Auckland and Wellington (New Zealand), Lisbon (Portugal), Madrid (Spain), and London (United Kingdom).

**Figure CB7 - Vote for left-wing parties among capital cities in Western democracies**

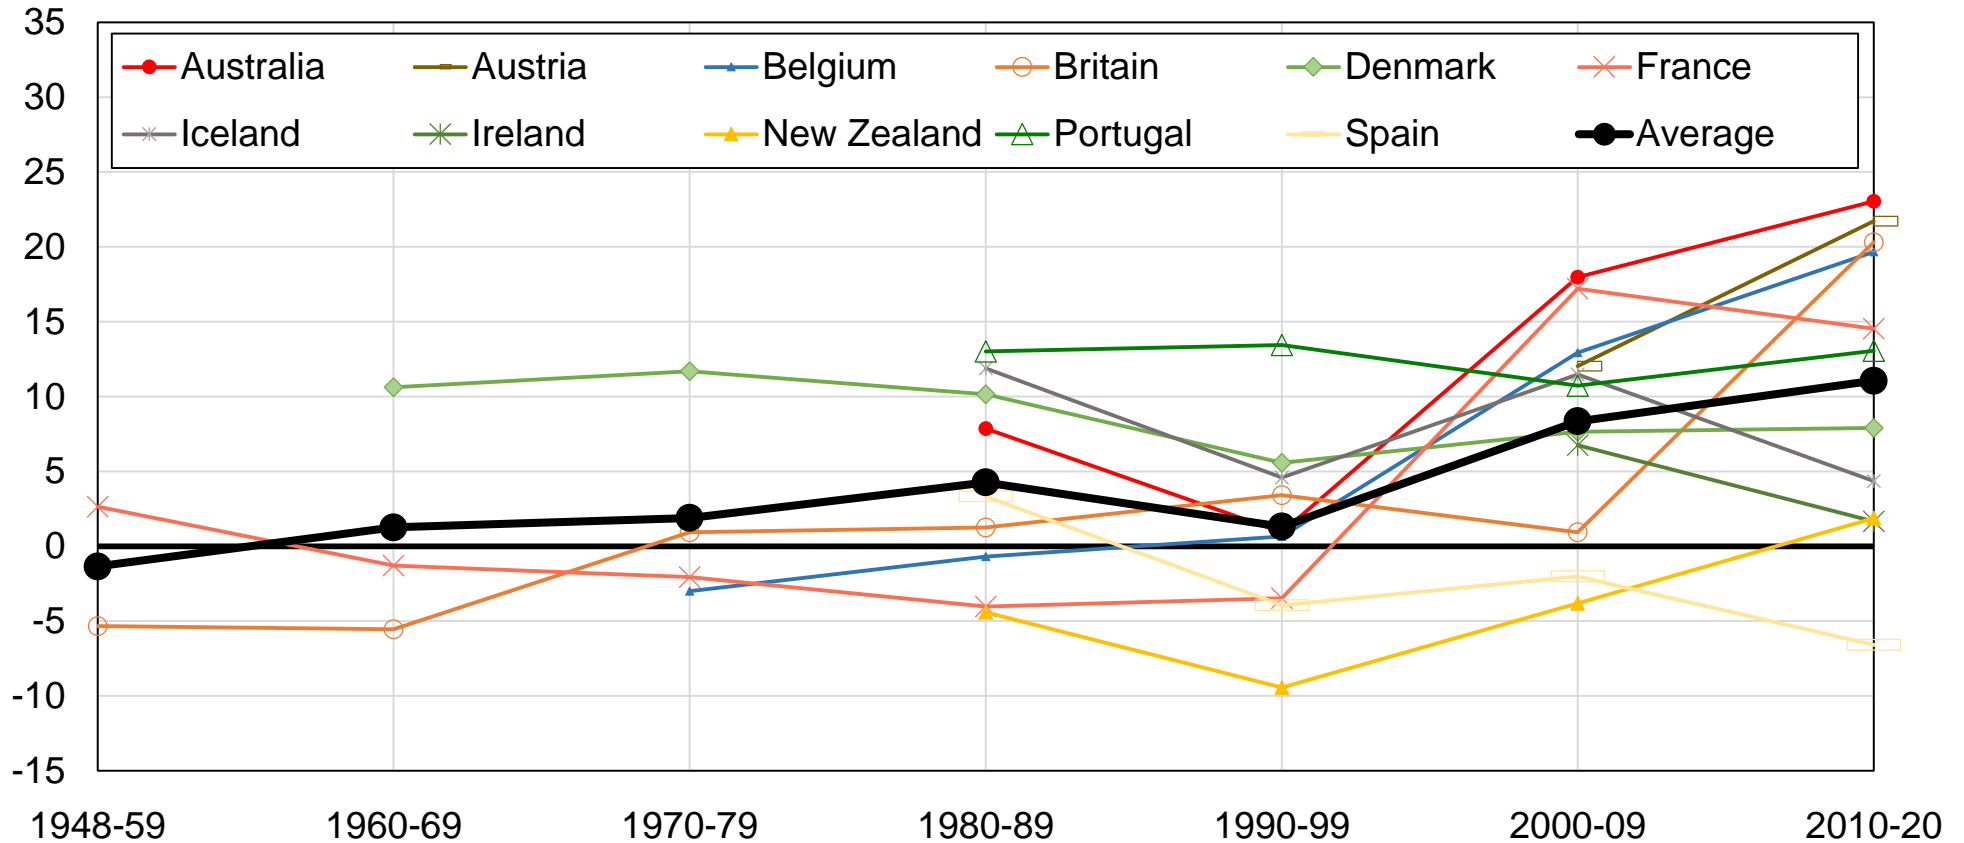

**Source:** authors' computations using the World Political Cleavages and Inequality Database.

**Note:** the figure shows the difference between the share of voters living in the capital city and the share of other voters voting for left-wing parties in Western democracies. Centers correspond to the Australian Capital Territory (Australia), Vienna (Austria), Brussels (Belgium), Copenhagen (Denmark), Paris (France), Reykjavík (Iceland), Dublin (Ireland), Auckland and Wellington (New Zealand), Lisbon (Portugal), Madrid (Spain), and London (United Kingdom).

**Figure CB8 - Vote for left-wing parties among capital cities in Western democracies, after controls**

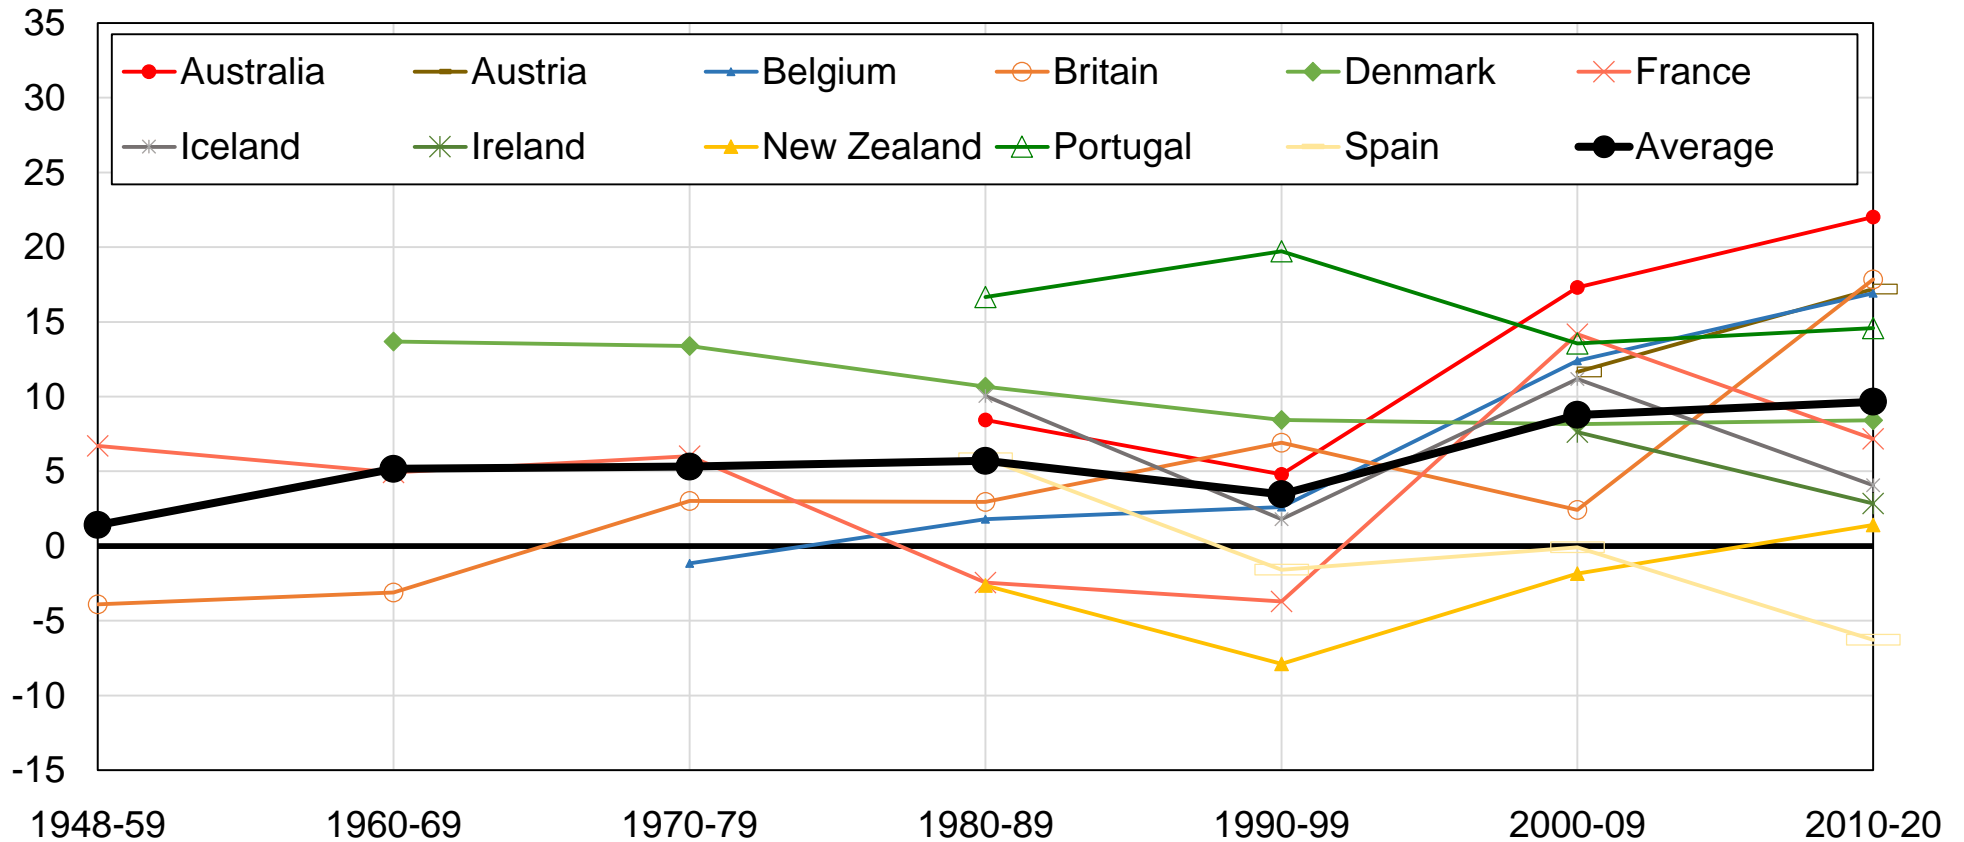

**Source:** authors' computations using the World Political Cleavages and Inequality Database.

**Note:** the figure shows the difference between the share of voters living in the capital city and the share of other voters voting for left-wing parties in Western democracies, after controlling for income, education, age, gender, employment status, and marital status. Centers correspond to the Australian Capital Territory (Australia), Vienna (Austria), Brussels (Belgium), Copenhagen (Denmark), Paris (France), Reykjavík (Iceland), Dublin (Ireland), Auckland and Wellington (New Zealand), Lisbon (Portugal), Madrid (Spain), and London (United Kingdom).

**Figure CC1 - The religious divide**

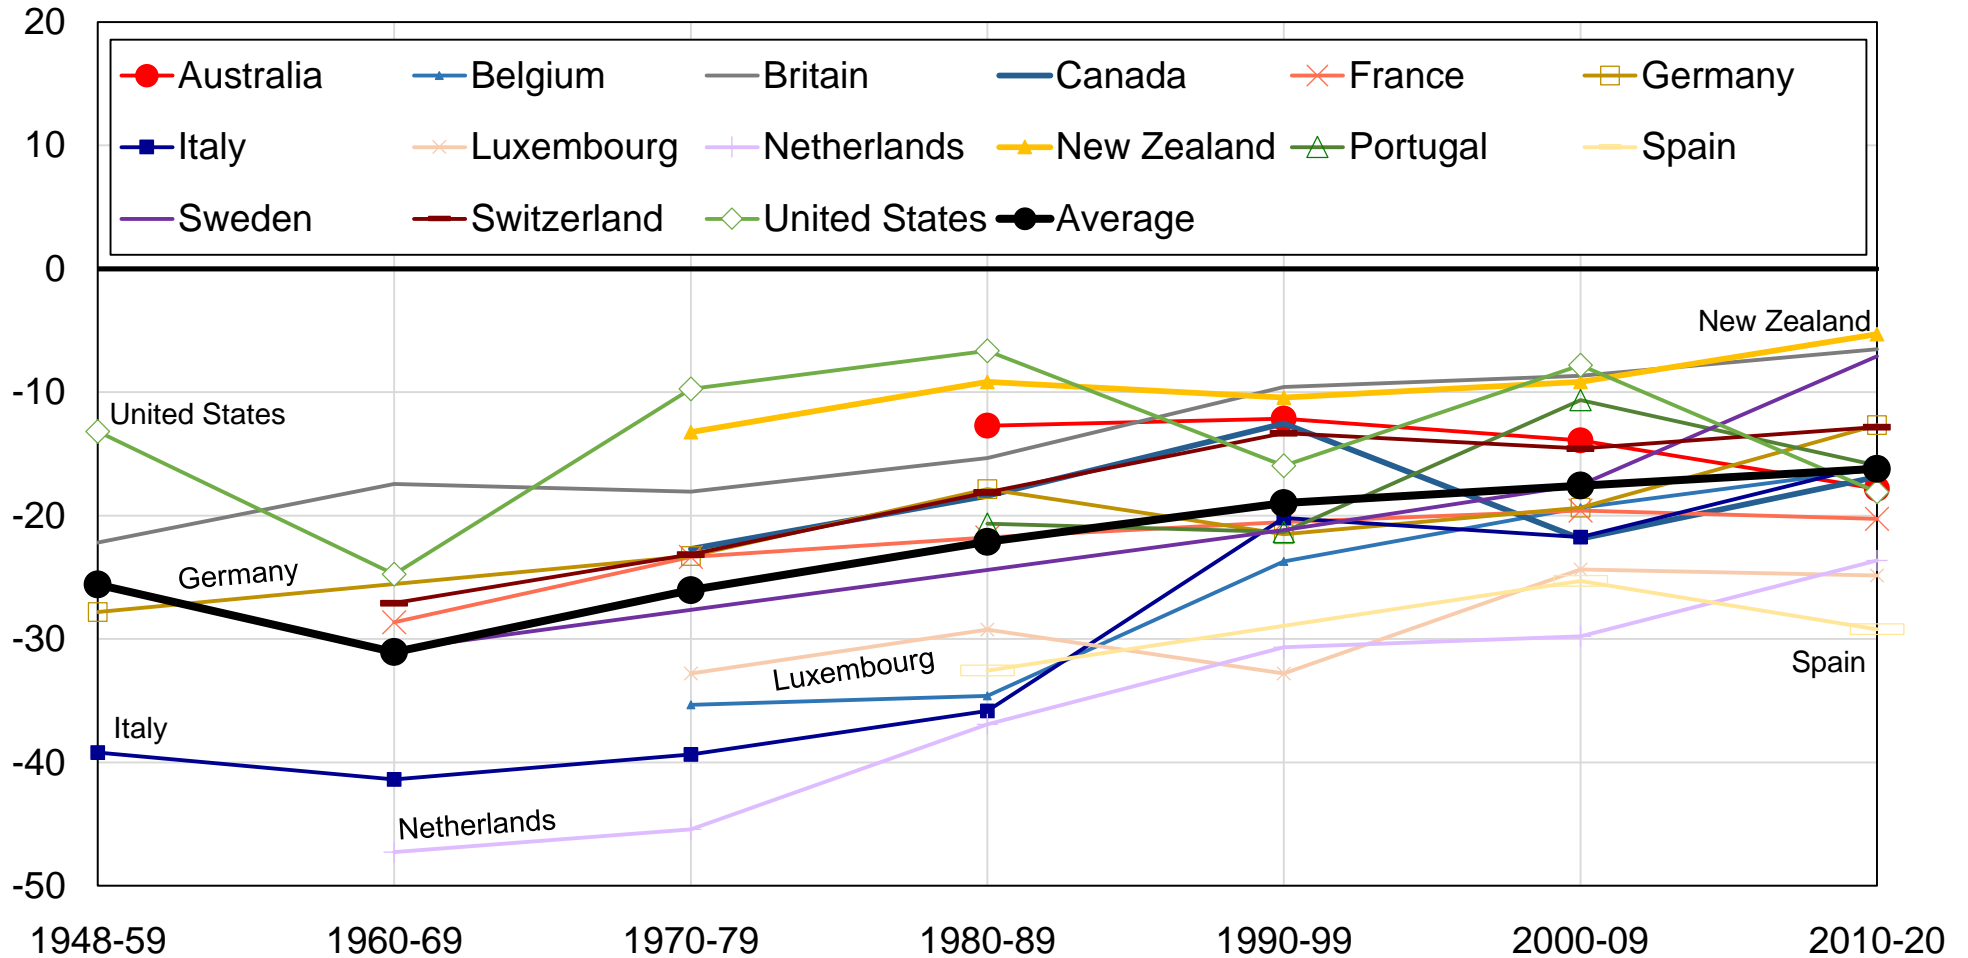

**Source:** authors' computations using the World Political Cleavages and Inequality Database.

**Note:** the figure displays the difference between the share of Catholics (or Catholics and Protestants in mixed countries) declaring going to church at least once a year and the share of other voters voting for social democratic / socialist / communist / green parties. In all countries, religious voters have remained significantly less likely to vote for these parties than other voters.

**Figure CC2 - Vote for left-wing parties by religion in Western democracies, 1970s**

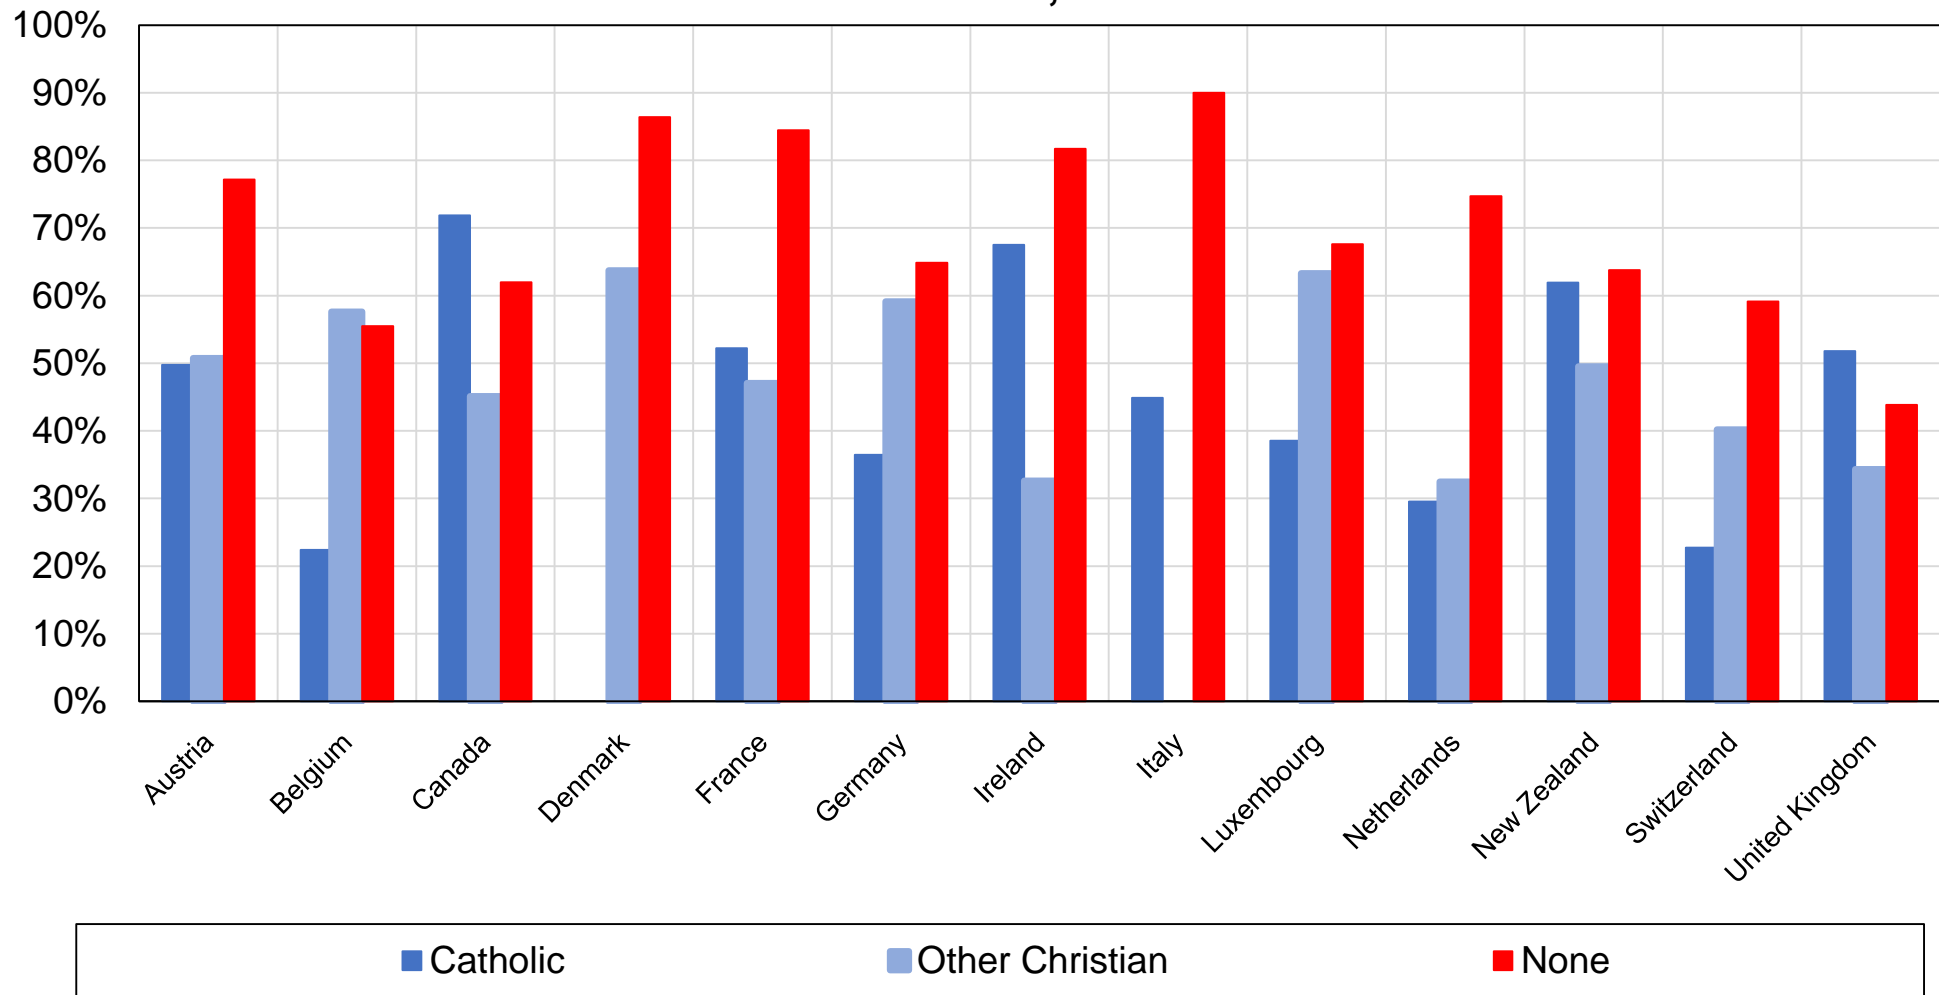

**Source:** authors' computations using the World Political Cleavages and Inequality Database.

**Note:** the figure shows the share of votes received by left-wing parties by religion in the 1970s in Western democracies.



**Figure CC3 - Vote for left-wing parties by religion in Western democracies, 2010s**

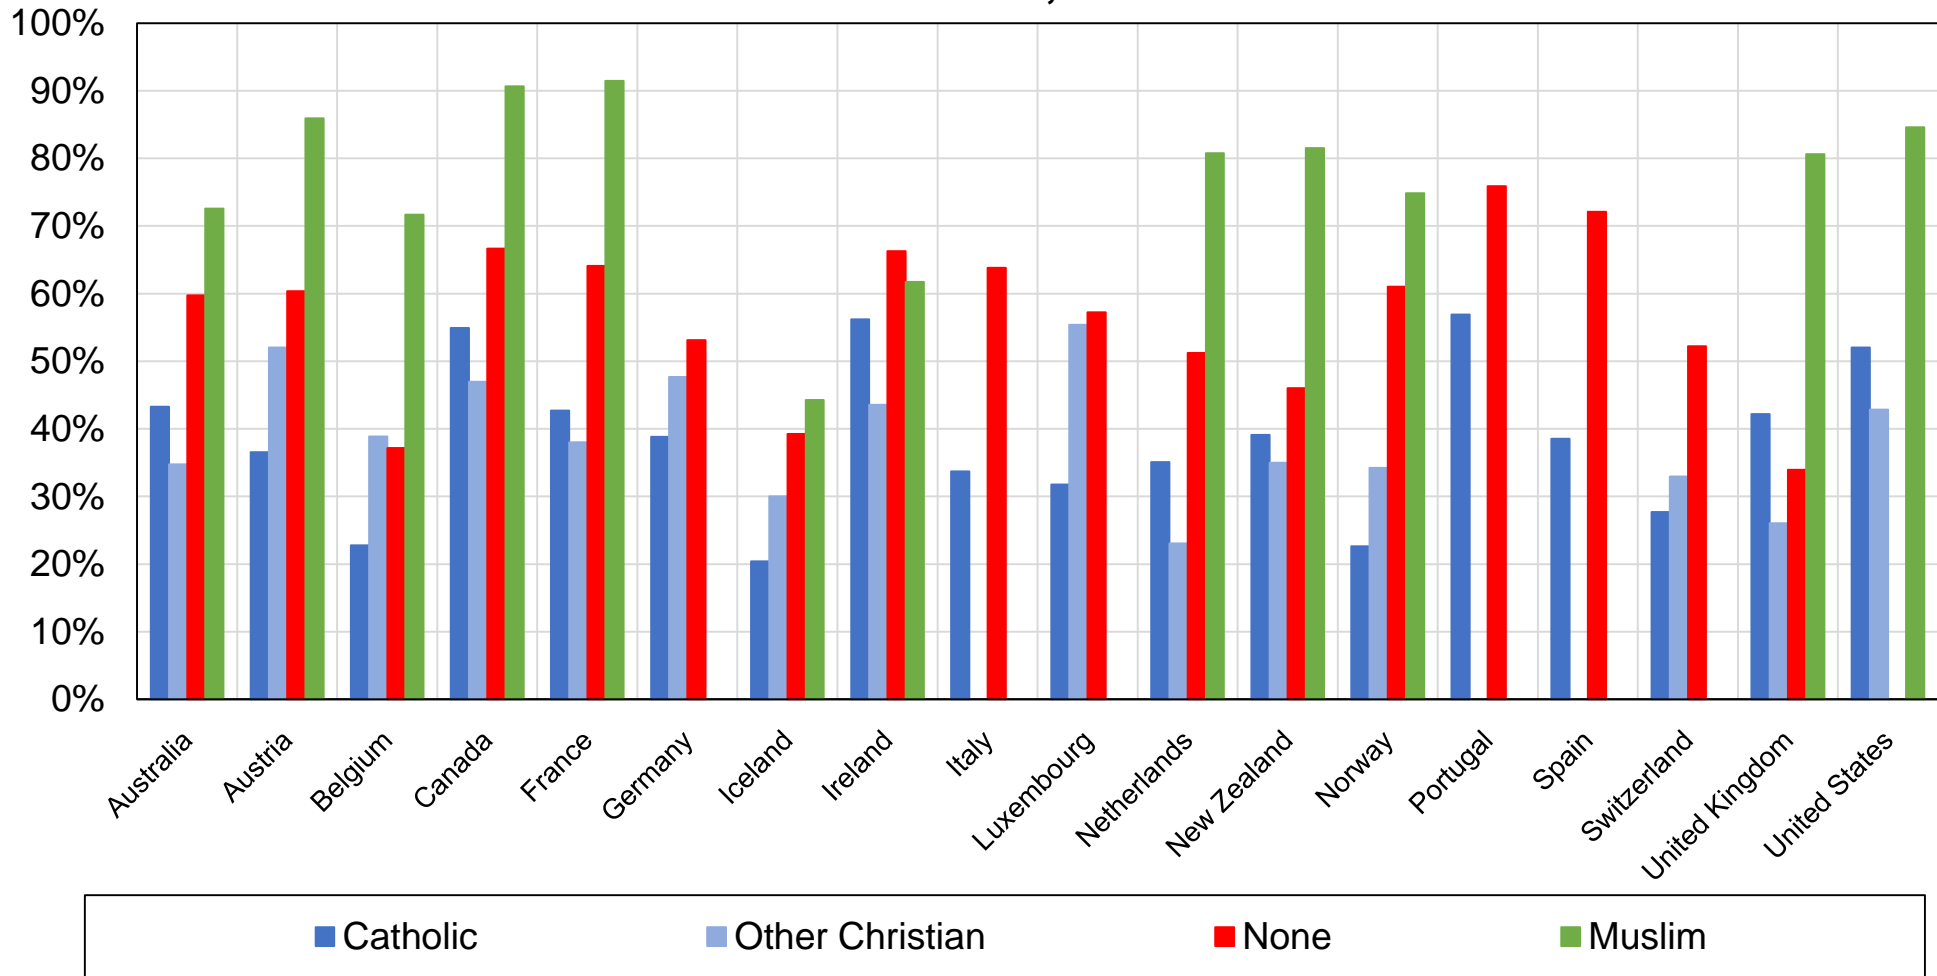

**Source:** authors' computations using the World Political Cleavages and Inequality Database.

**Note:** the figure shows the share of votes received by left-wing parties by religion in the 2010s in Western democracies.

**Figure CC4 - Vote for left-wing parties among voters with no religion in Western democracies**

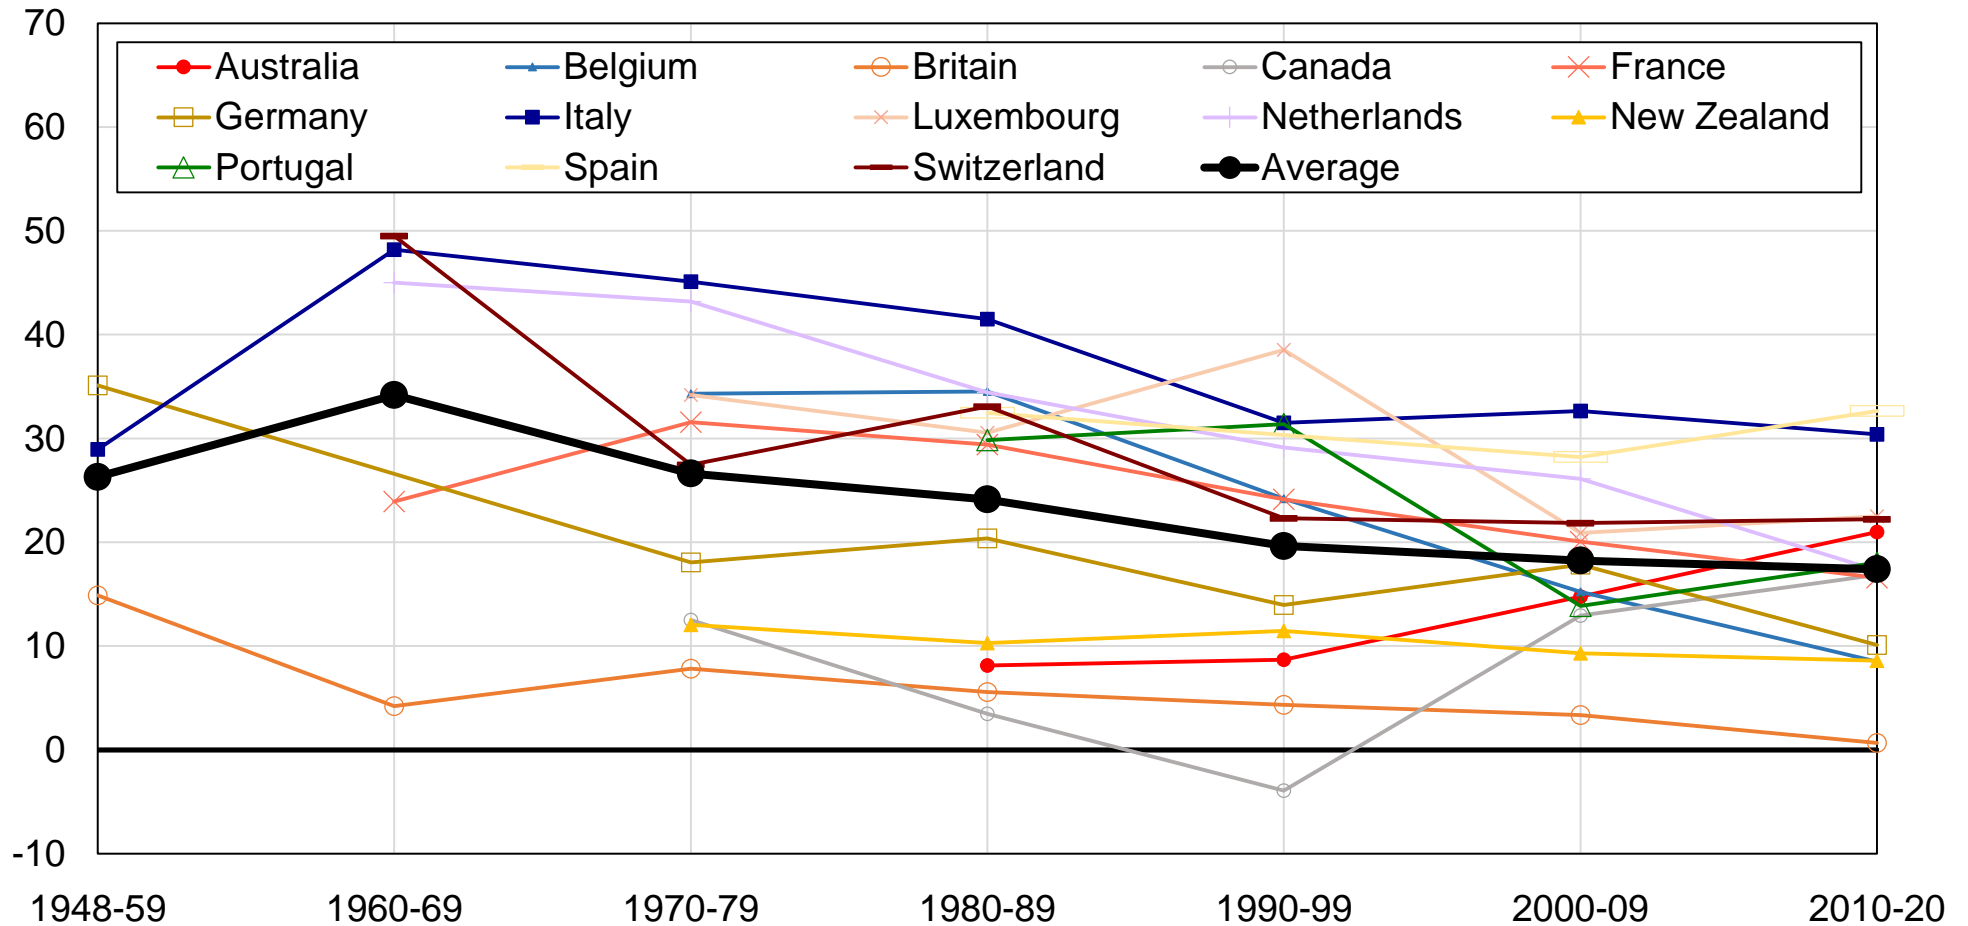

**Source:** authors' computations using the World Political Cleavages and Inequality Database.

**Note:** the figure represents the difference between the share of voters belonging to no religion and the share of other voters voting for left-wing parties in Western democracies. Non-religious voters have remained significantly more left-wing than the rest of the electorate since the 1950s.

**Figure CC5 - Vote for Green parties by religion, 2010s**

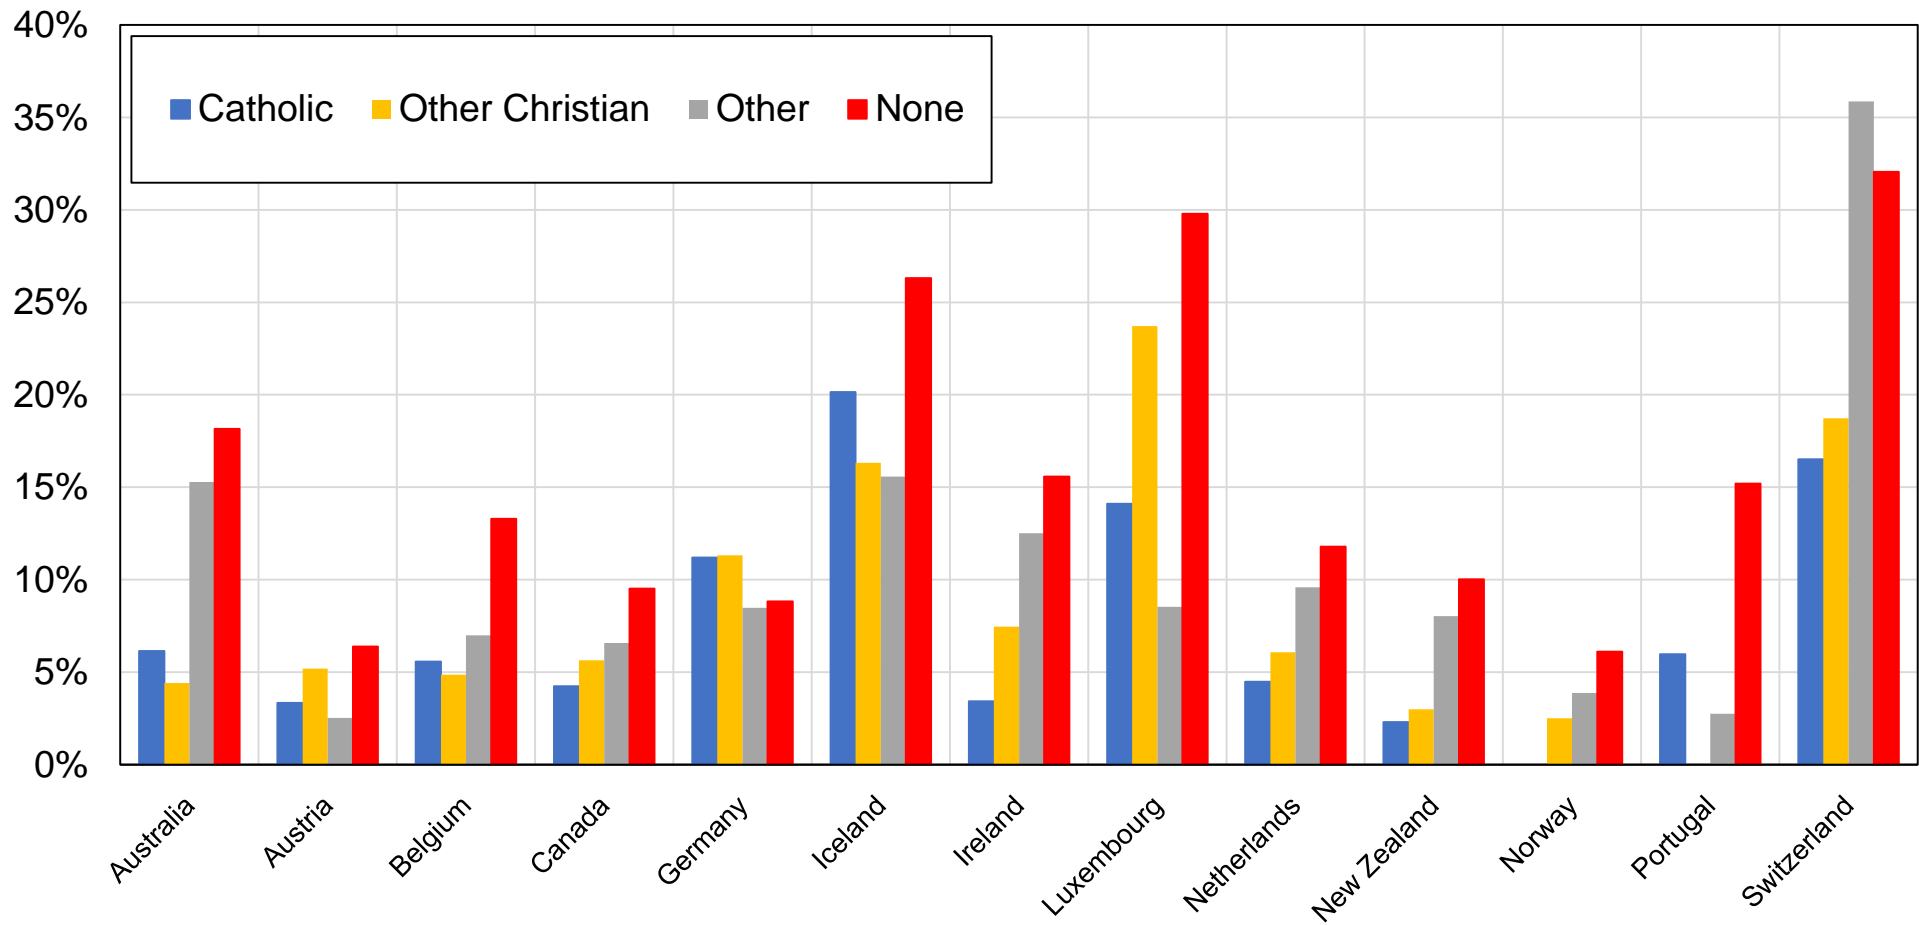

**Source:** authors' computations using the World Political Cleavages and Inequality Database.

**Note:** the figure shows the share of votes received by Green parties by religious affiliation.

**Figure CC6 - Vote for anti-immigration parties by religion, 2010s**

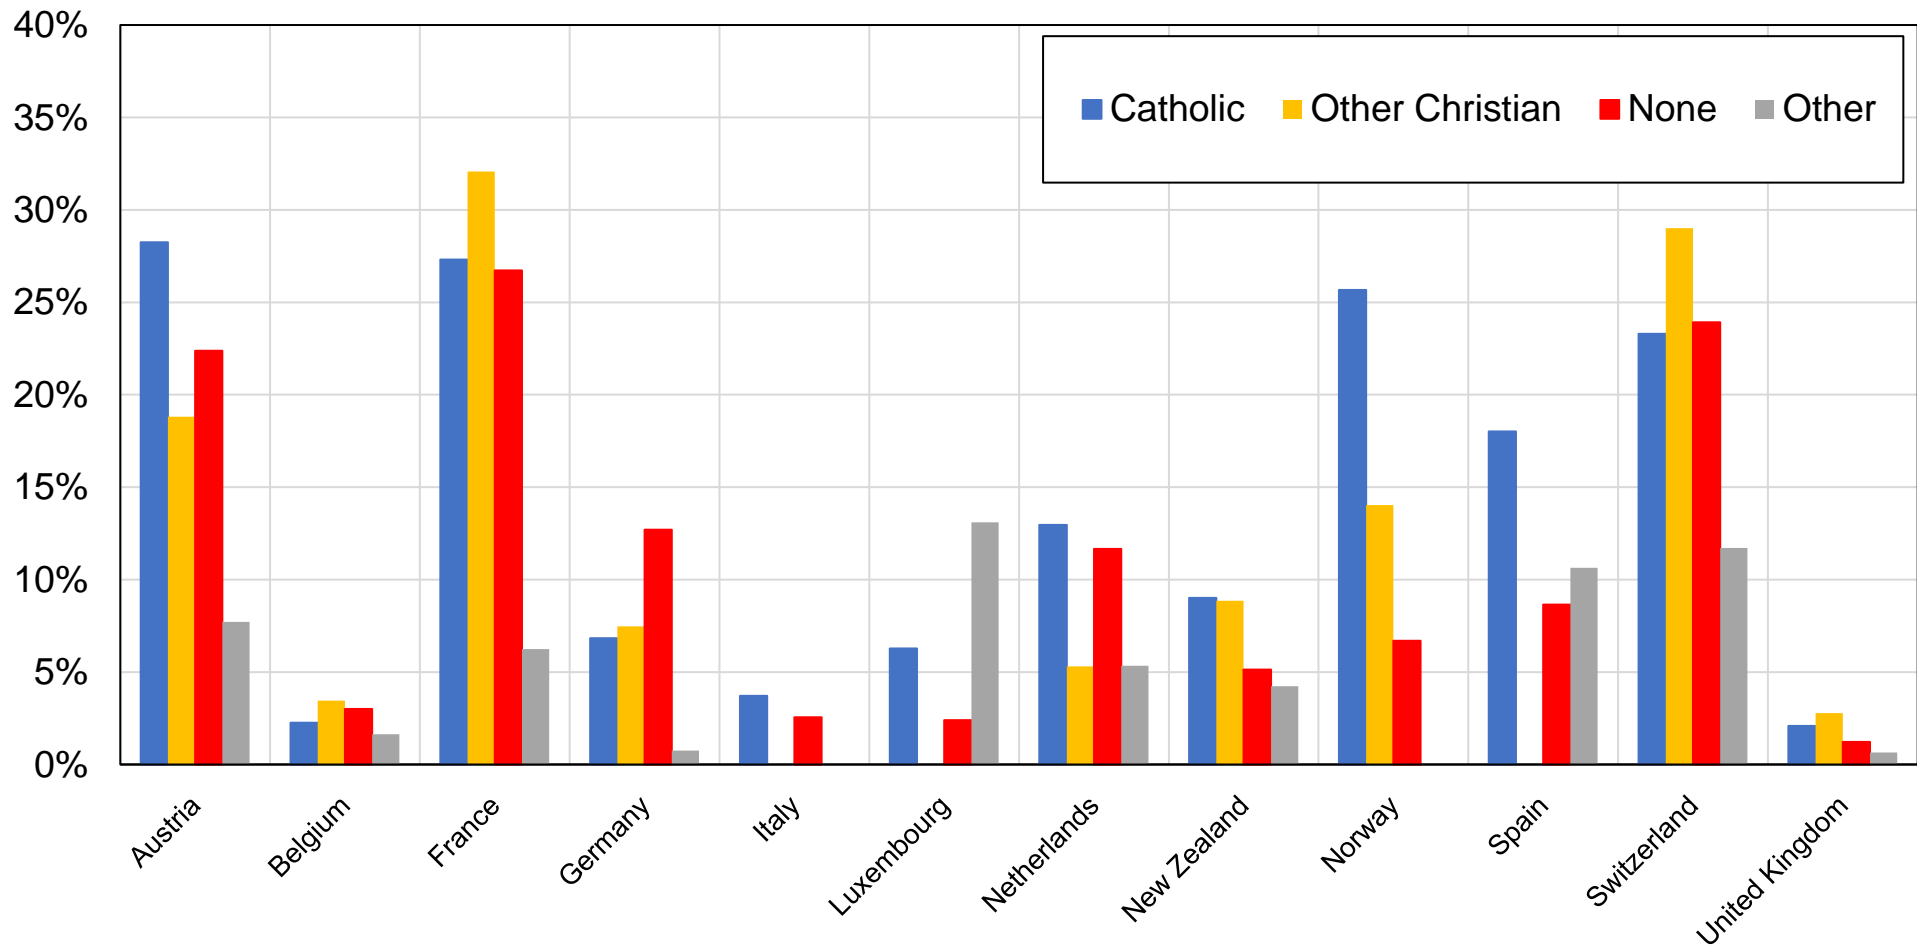

**Source:** authors' computations using the World Political Cleavages and Inequality Database.

**Note:** the figure shows the share of votes received by anti-immigration parties by religious affiliation.

**Figure CD1 - The reversal of the gender cleavage in Western democracies (before and after controls)**

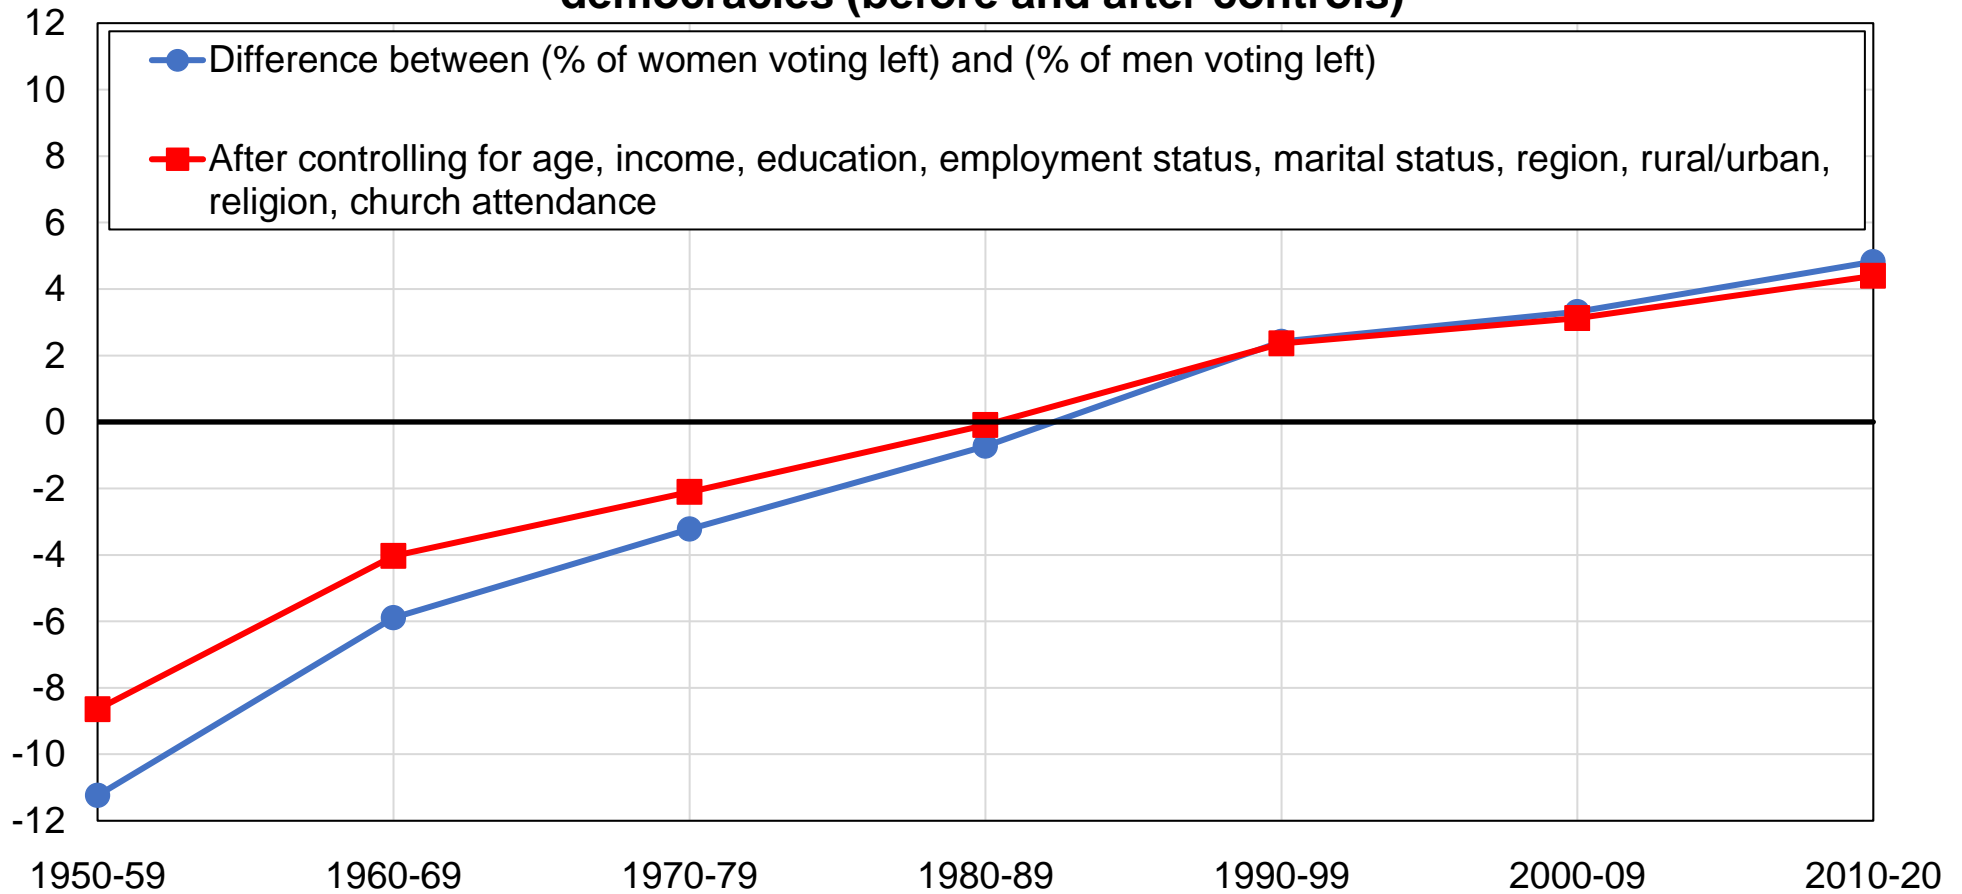

**Source:** authors' computations using the World Political Cleavages and Inequality Database.

**Note:** the figure displays the difference between the share of women and the share of men voting for left-wing (social democratic, socialist, communist, and green) parties in Western democracies, before and after controlling for other covariates (for country-years in which these variables are available). Women have gradually shifted from being significantly more right-wing to being significantly more left-wing than men, both before and after controls. Average over all Western democracies.

**Figure CD2 - The reversal of the gender cleavage**

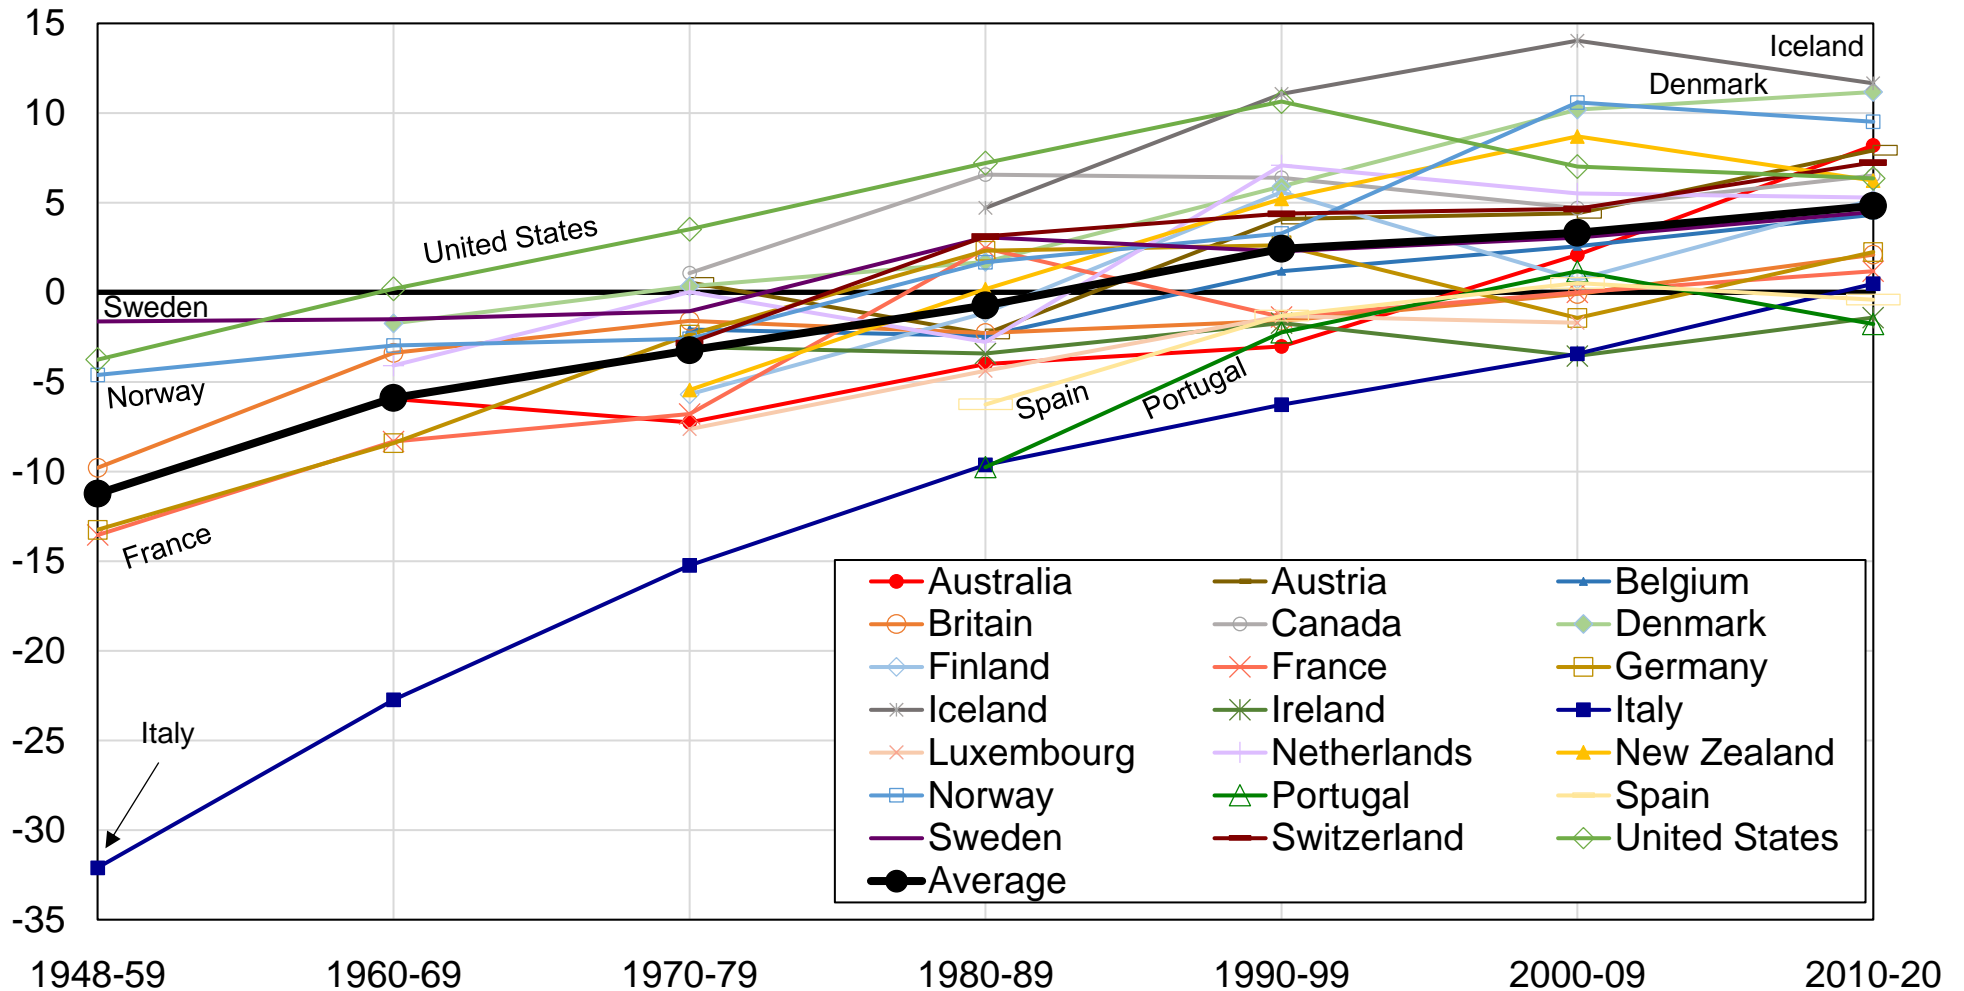

**Source:** authors' computations using the World Political Cleavages and Inequality Database.

**Note:** the figure displays the difference between the share of women and the share of men voting for social democratic / socialist / communist / green parties in Western democracies. In the majority of countries, women have gradually shifted from being significantly more conservative than men in the 1950s-1960s to being significantly more left-wing in the 2000s-2010s.

**Figure CD3 - Vote for left-wing parties among women in Western democracies (after controlling for religion)**

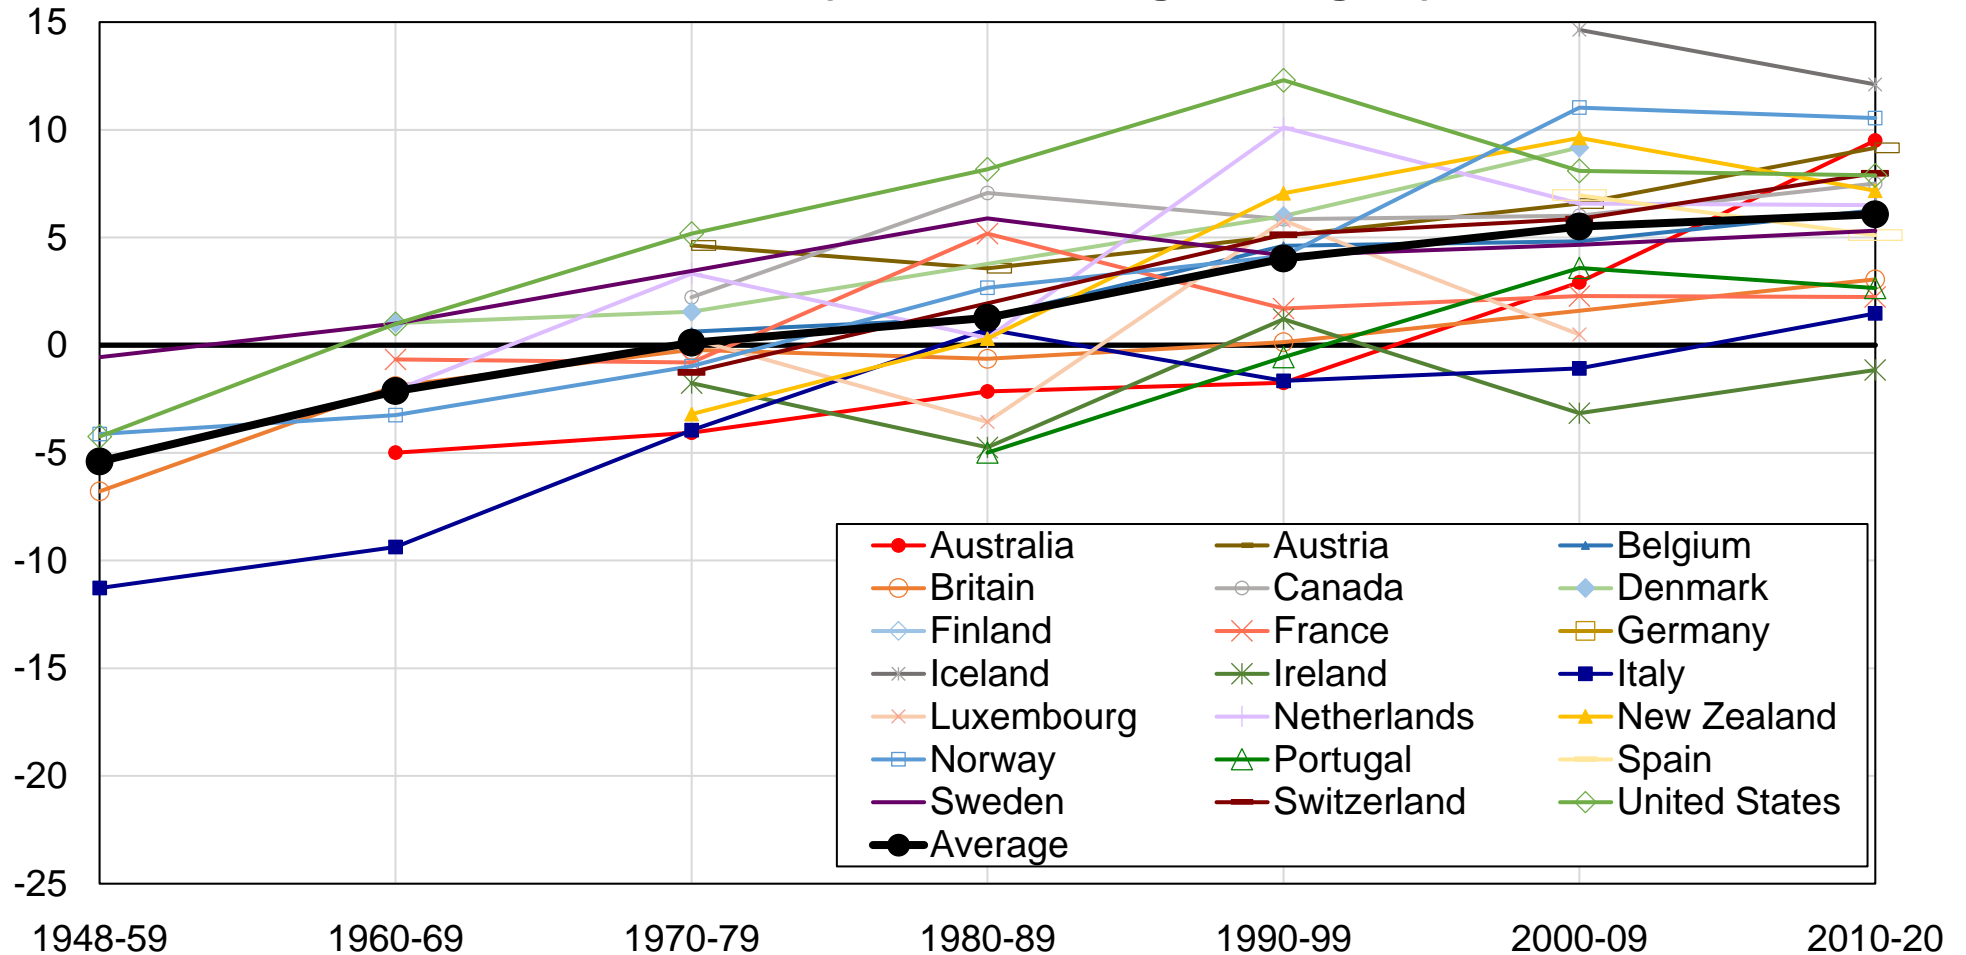

**Source:** authors' computations using the World Political Cleavages and Inequality Database.

**Note:** the figure displays the difference between the share of women and the share of men voting for left-wing (socialist, social democratic, communist, and green) parties in Western democracies, after controlling for religion and church attendance. In the majority of countries, women have gradually shifted from being significantly more right-wing to being significantly more left-wing than men.

**Figure CD4 - Gender cleavages and sectoral specialization in Western democracies**

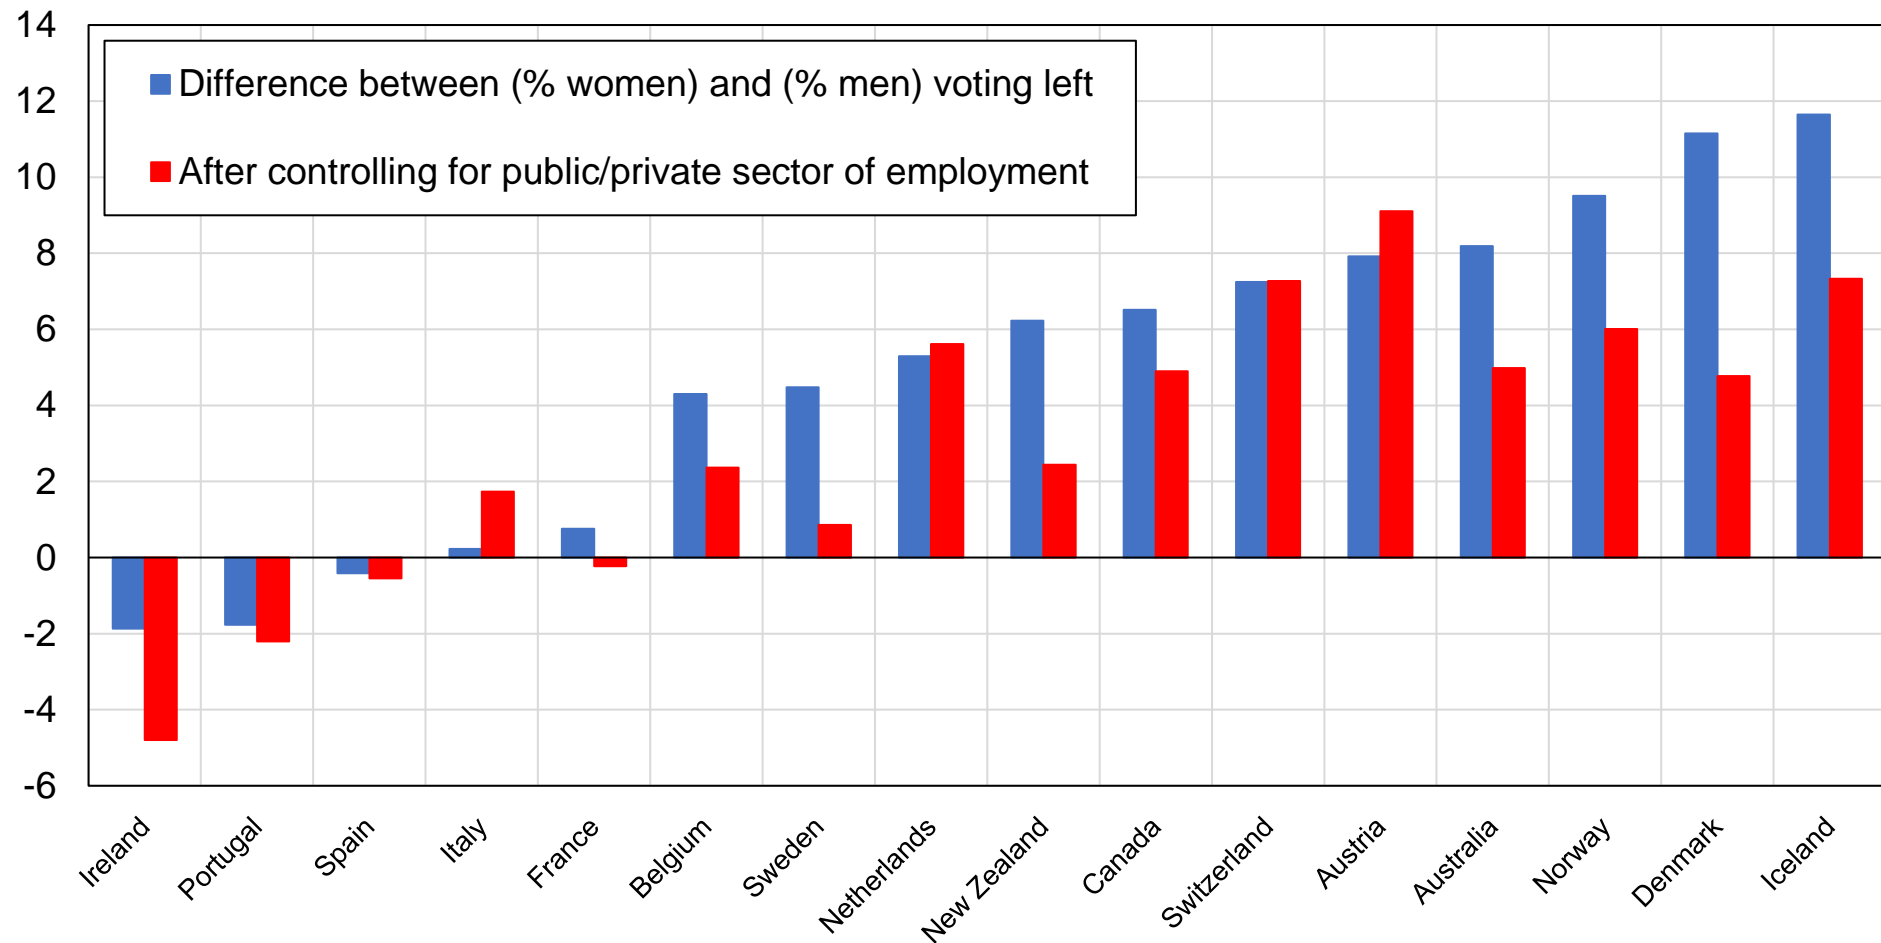

**Source:** authors' computations using the World Political Cleavages and Inequality Database.

**Note:** the figure shows the difference between the share of women and the share of men voting for left-wing parties in Western democracies in the last election available, before and after controlling for occupation (employment status + private/public sector of employment).



**Figure CD5 - Vote for green parties by gender in Western democracies**

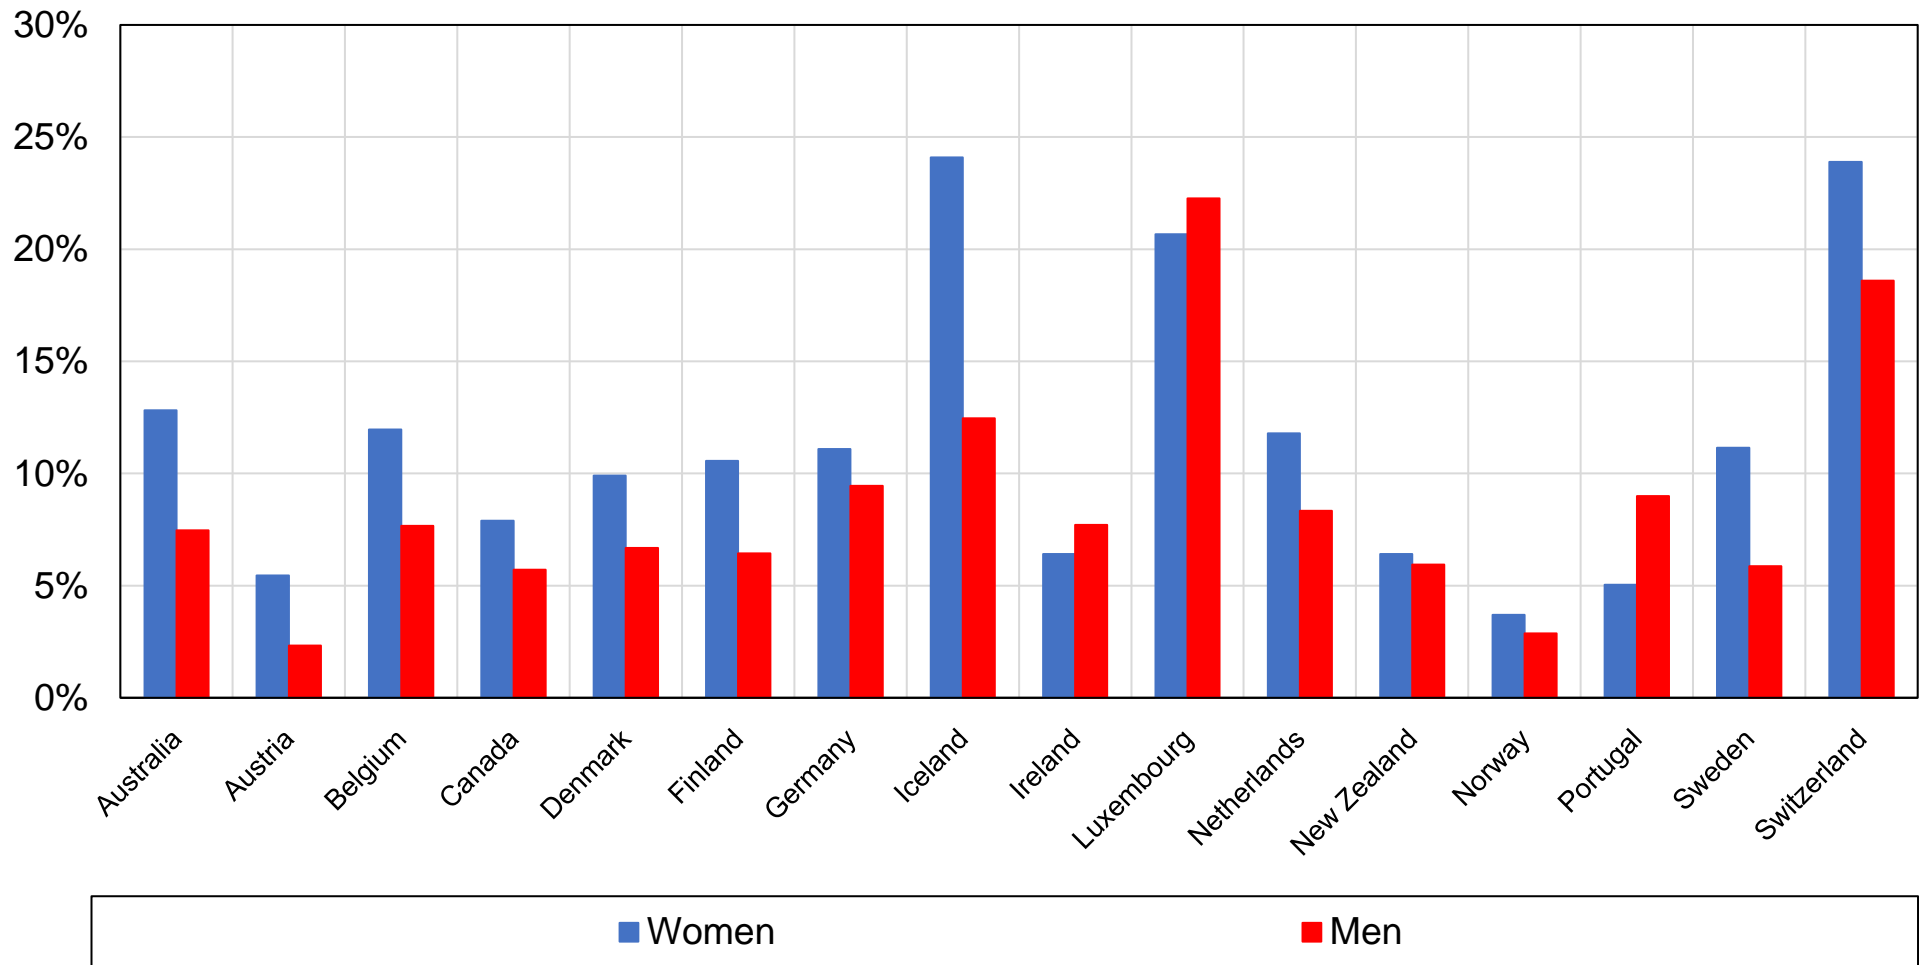

**Source:** authors' computations using the World Political Cleavages and Inequality Database.

**Note:** the figure shows the share of votes received by Green parties by gender in Western democracies in the last election available.

**Figure CD6 - Vote for anti-immigration parties by gender in Western democracies**

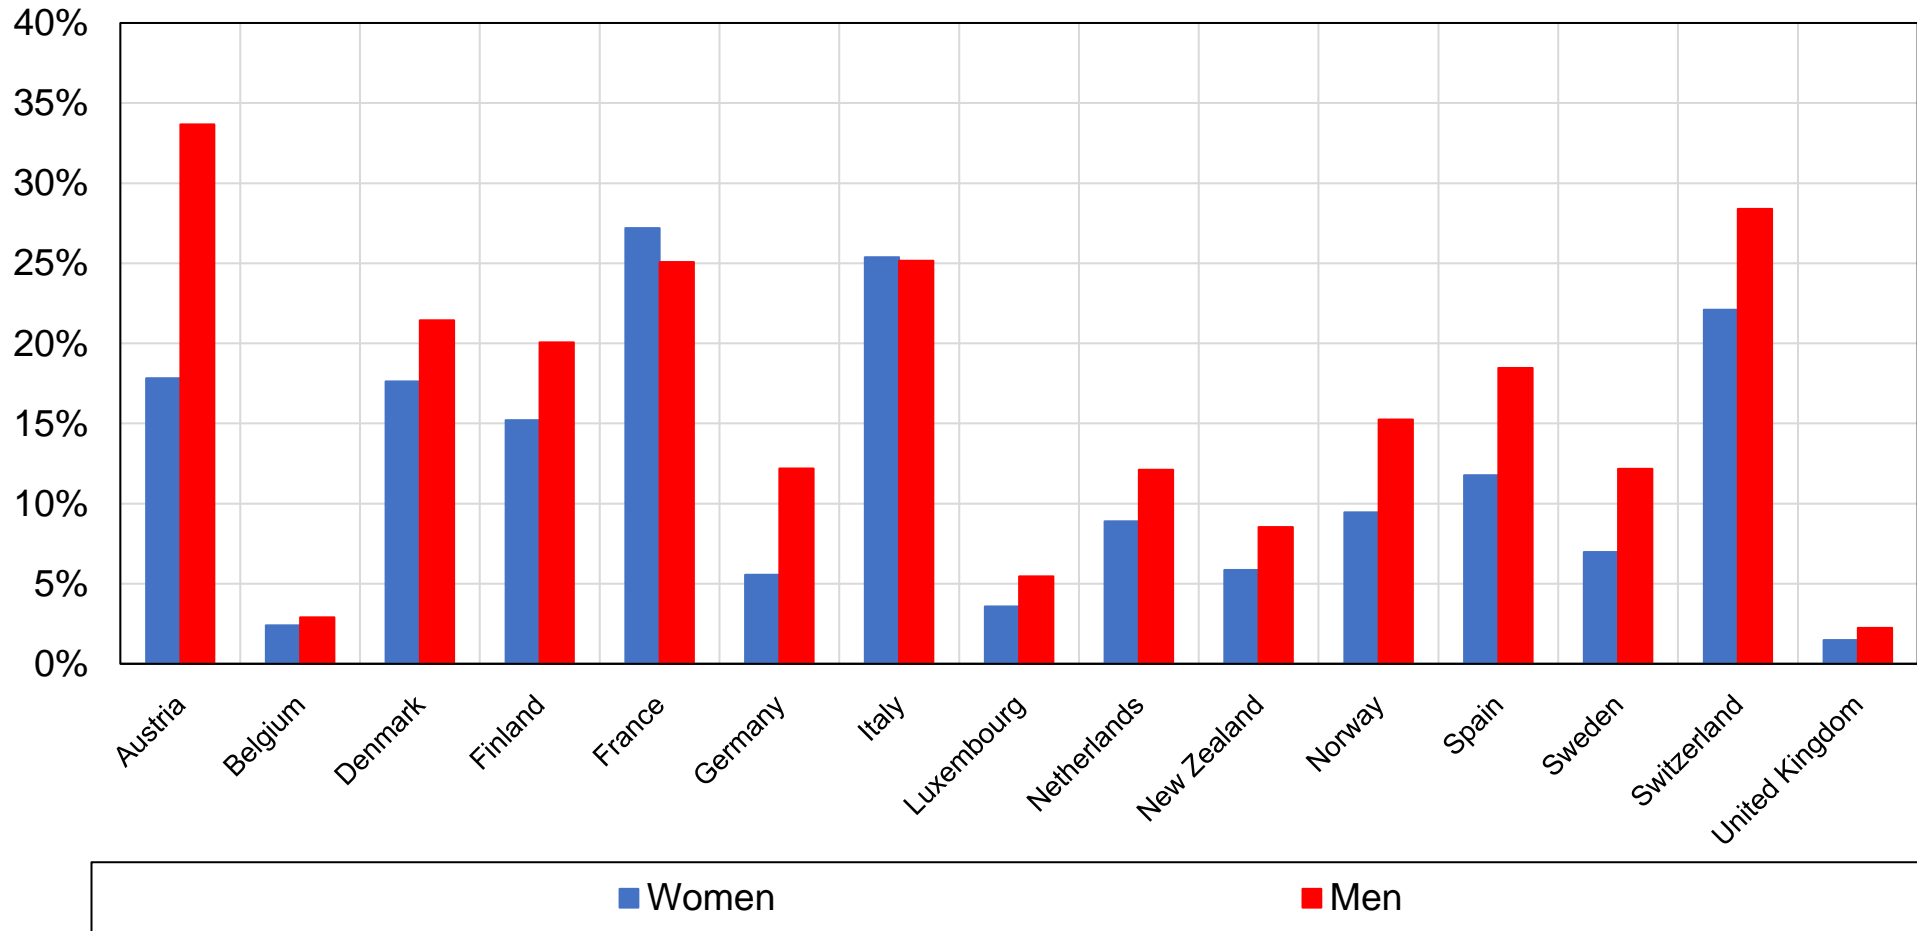

**Source:** authors' computations using the World Political Cleavages and Inequality Database.

**Note:** the figure shows the share of votes received by anti-immigration parties by gender in Western democracies in the last election available.

**Figure CE1 - The nativist cleavage**  
**The native-immigrant cleavage**

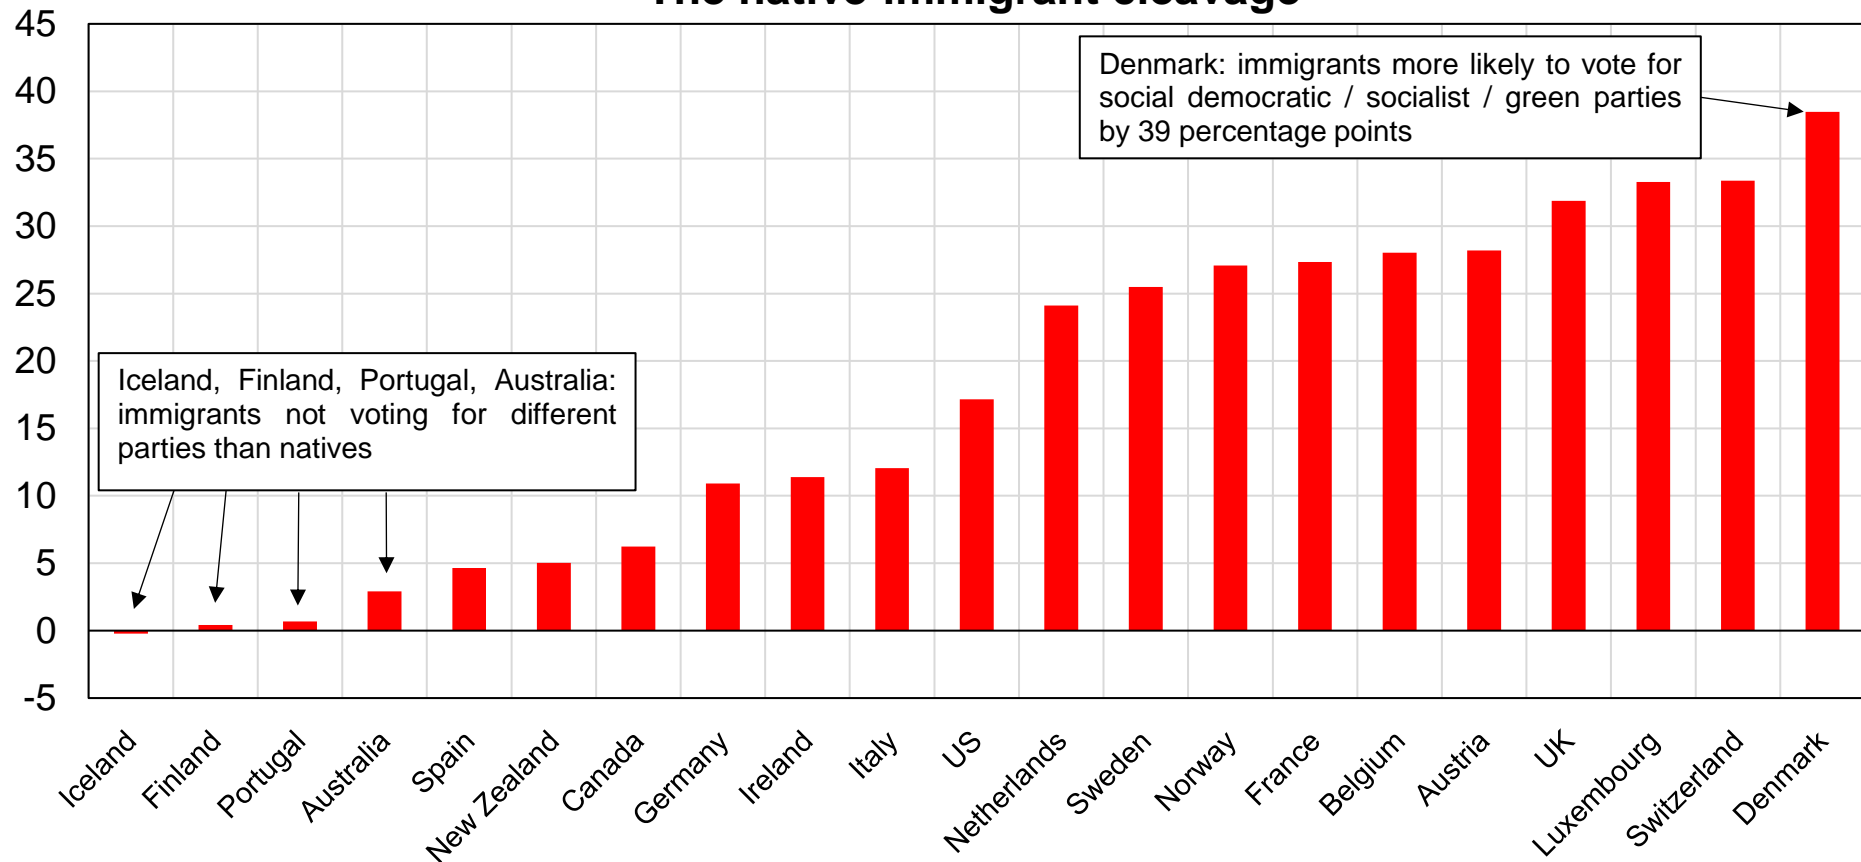

**Source:** authors' computations using the World Political Cleavages and Inequality Database and the European Social Survey for Denmark, Finland, Germany, Italy, Norway, Spain, Sweden, Switzerland, and the United Kingdom.

**Note:** the figure represents the difference between the share of voters born in non-Western countries (all countries excluding Europe, Australia, New Zealand, Canada, and the United States) and the share of natives (voters born in the country considered) voting for social democratic / socialist / communist / green parties over the 2010-2020 period. In nearly all Western countries, immigrants are much more likely to vote for these parties than natives. US and Iceland figures include voters born in Western countries given lack of data on exact country of origin. Excludes Fianna Fáil in Ireland.

**Figure CE2 - The nativist cleavage**  
**The Muslim vote**

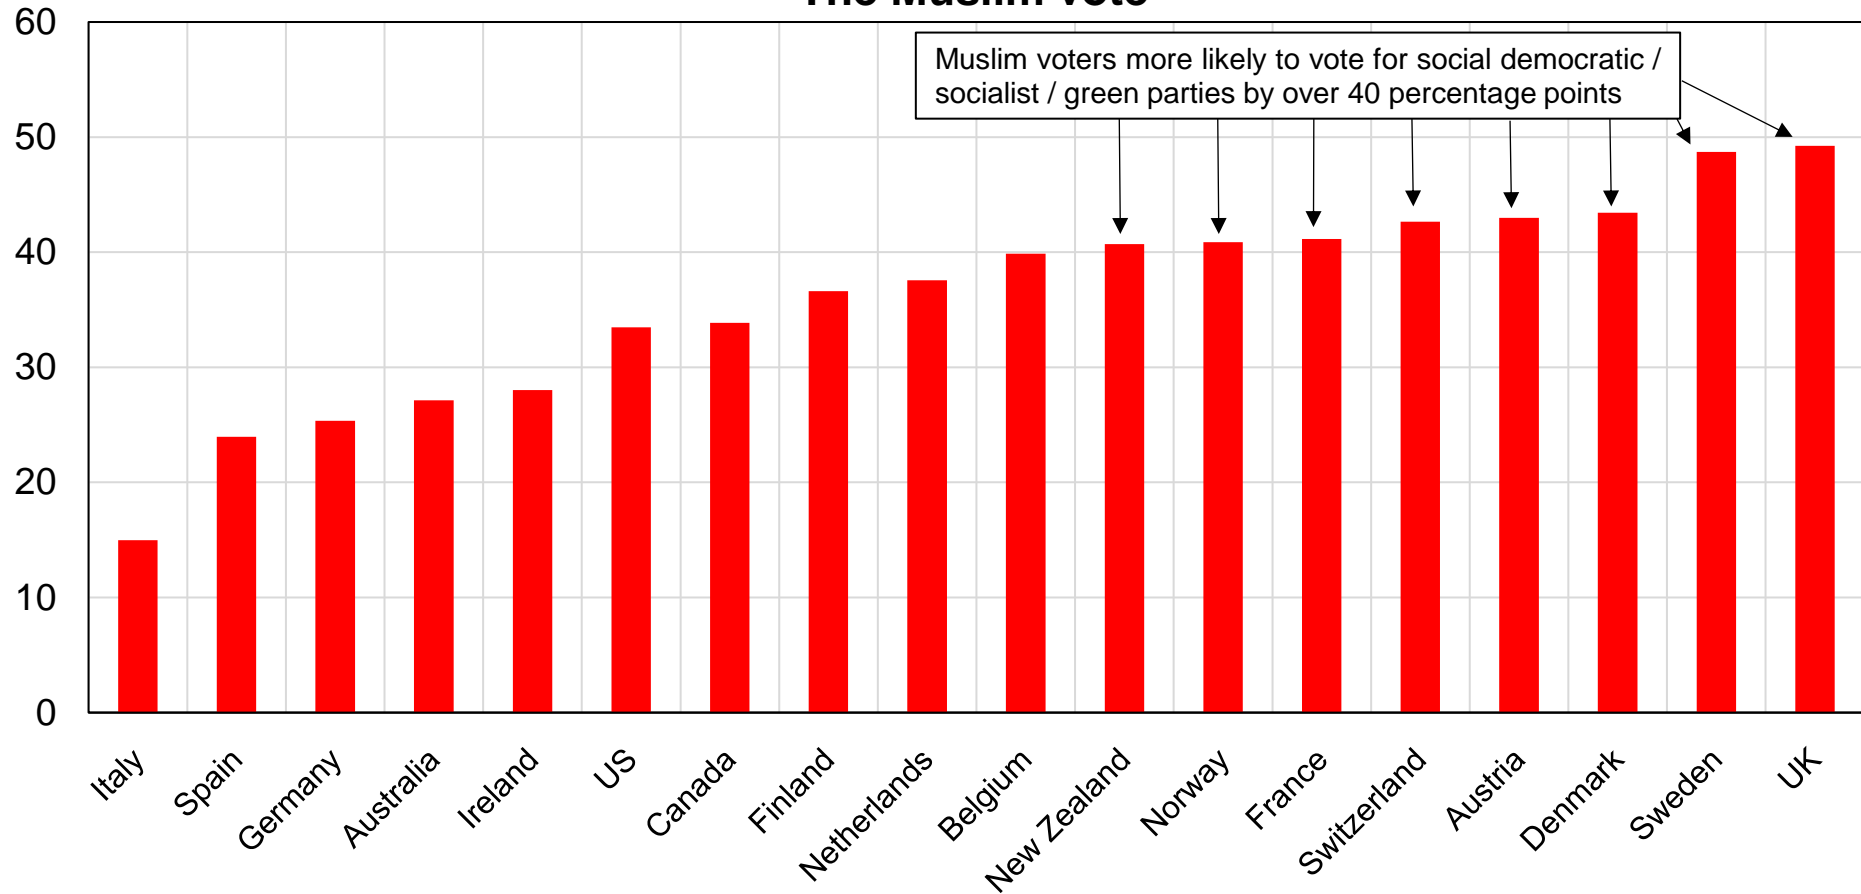

**Source:** authors' computations using the World Political Cleavages and Inequality Database and the European Social Survey for Denmark, Finland, Germany, Italy, Norway, Spain, Sweden, Switzerland, and the United Kingdom.

**Note:** the figure represents the difference between the share of Muslim voters and the share of non-Muslims voting for social democratic / socialist / communist / green parties over the 2010-2020 period. In all Western countries, Muslims are substantially more likely to vote for these parties than non-Muslims. This cleavage is stronger in countries with strong far-right parties (e.g. Sweden, Denmark, Austria, Switzerland, France). Excludes Fianna Fáil in Ireland.

**Figure CE3 - Vote for left-wing parties by country of birth in Western democracies, 2010s**

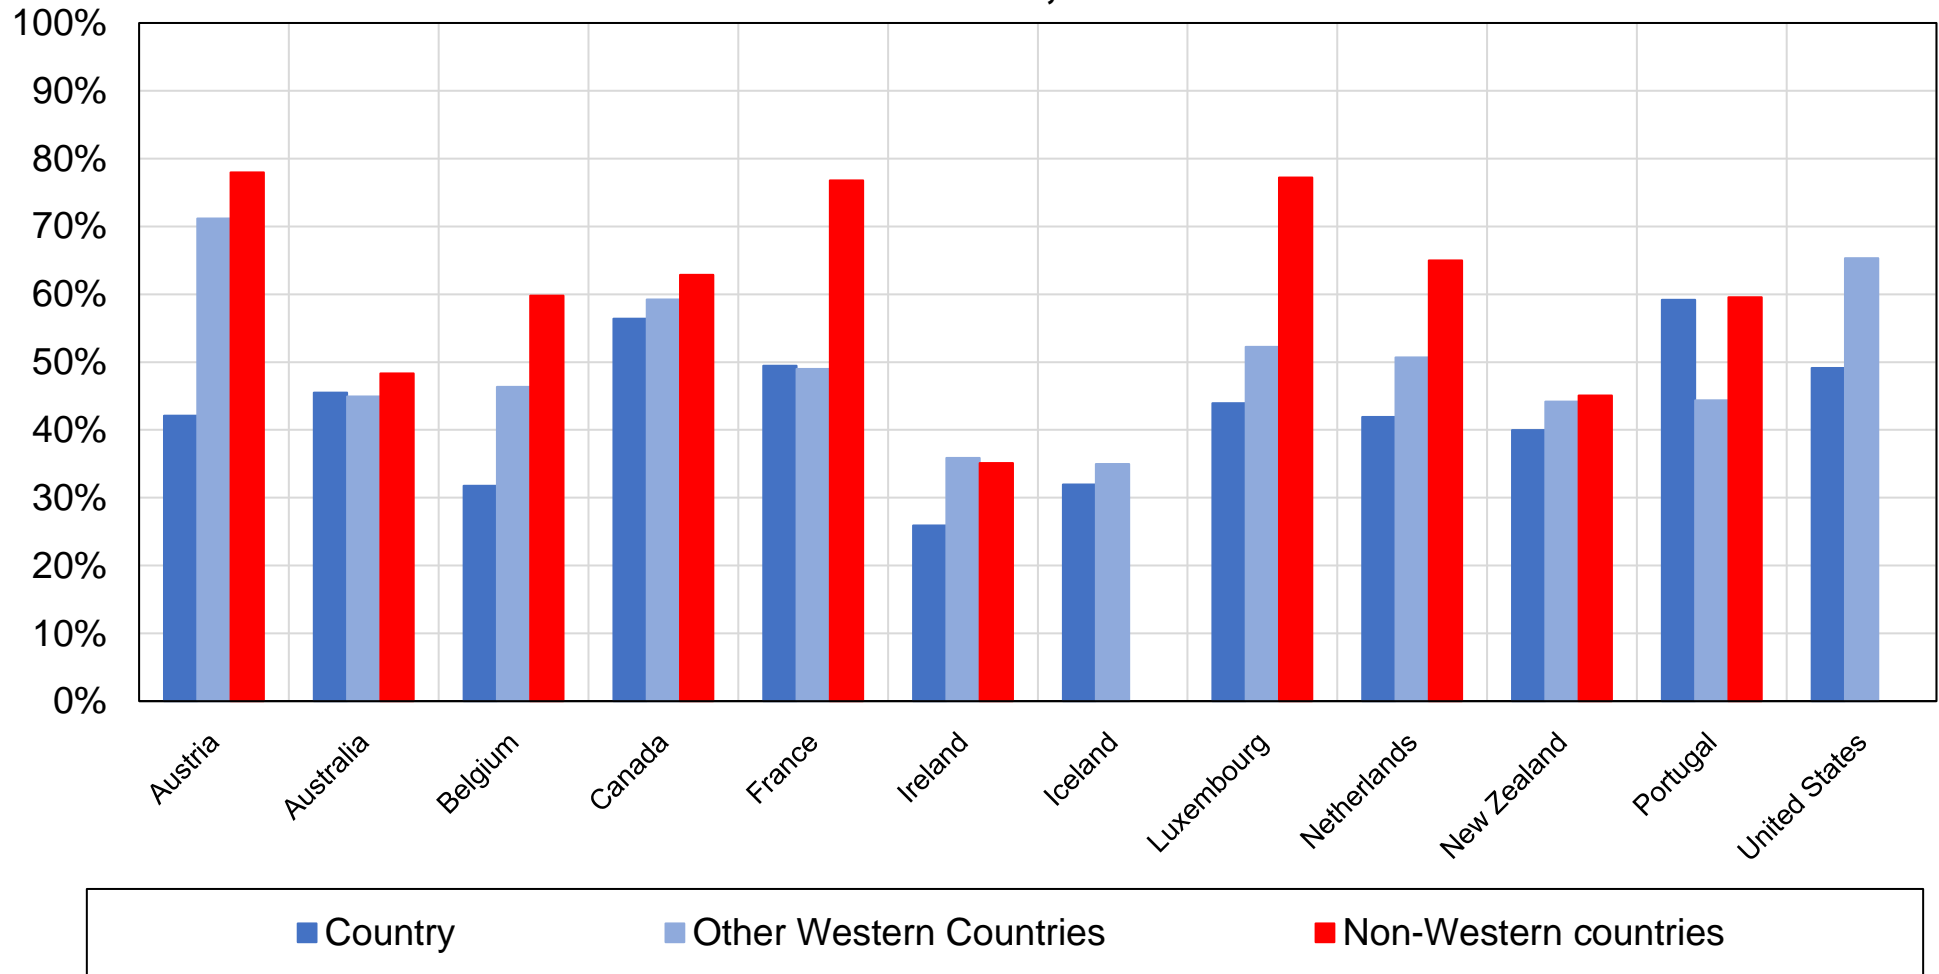

**Source:** authors' computations using the World Political Cleavages and Inequality Database.

**Note:** the figure shows the share of votes received by left-wing parties by country of birth in Western democracies in the 2010s. Excludes Fianna Fáil in Ireland. Covers 2007 and 2012 elections in France (no data in 2017).

**Figure CF1 - The decline of self-perceived class cleavages in Western democracies (before controls)**

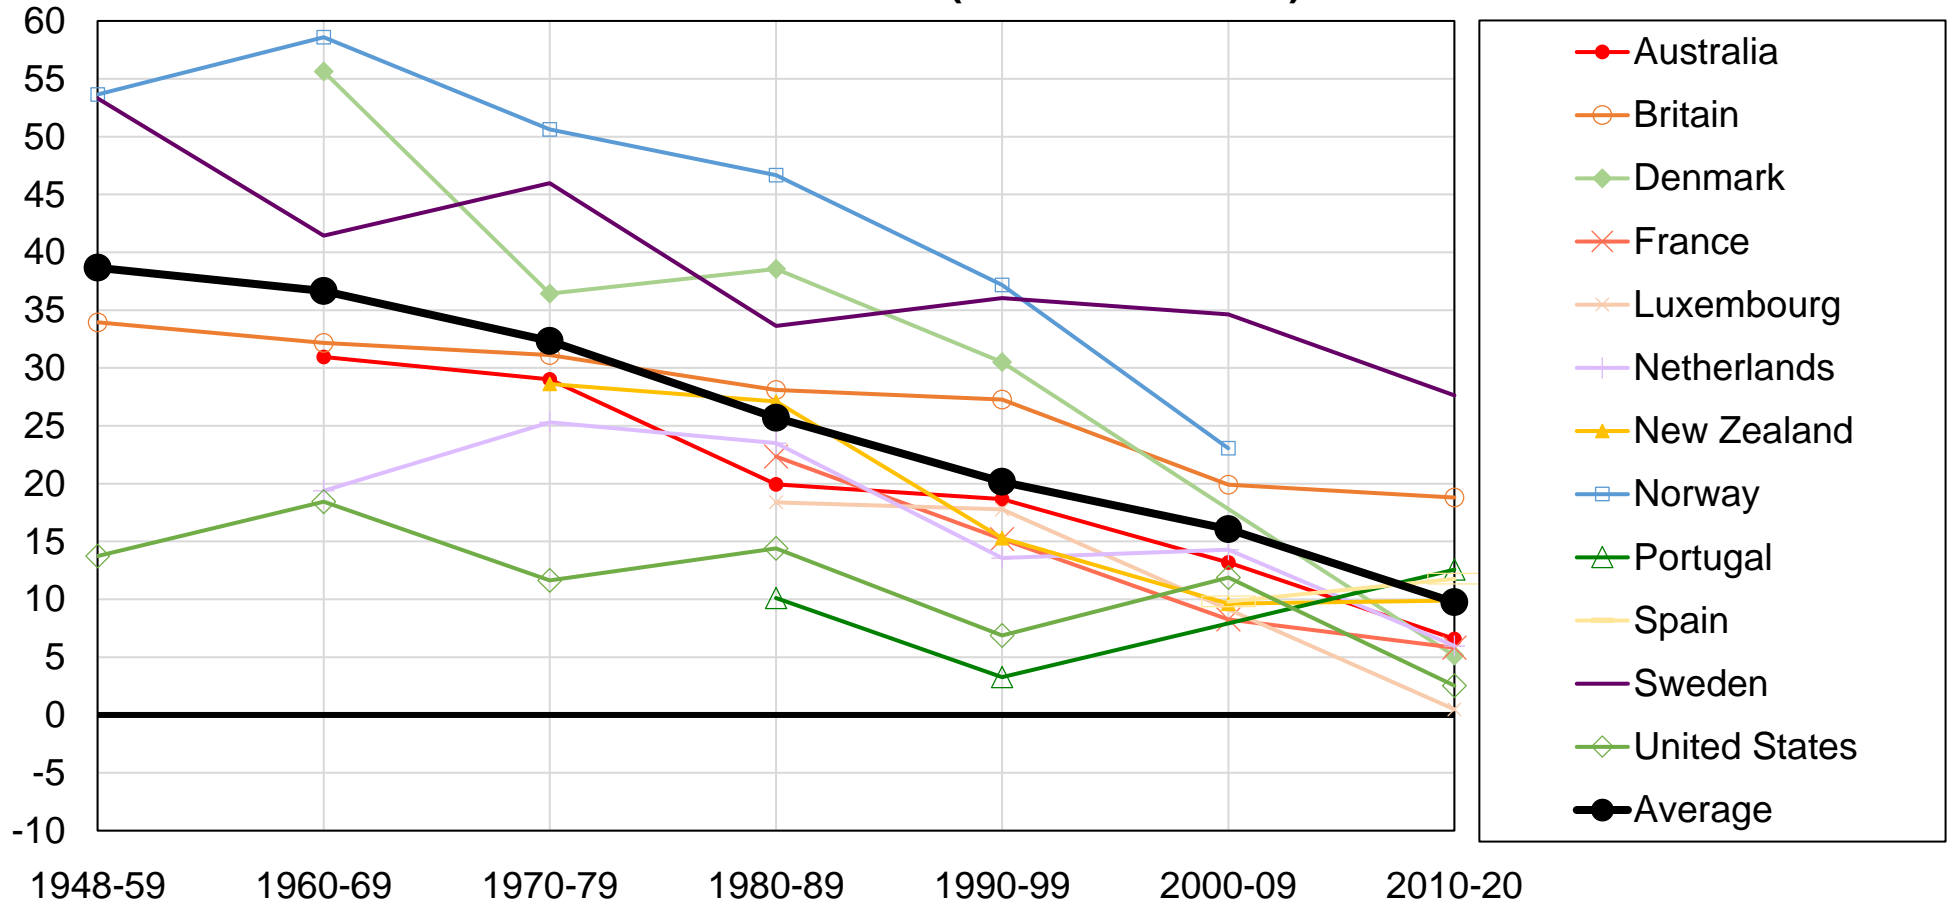

**Source:** authors' computations using the World Political Cleavages and Inequality Database.

**Note:** the figure shows the difference between the share of voters self-identifying as belonging to the "working class" or the "lower class" and the share of voters identifying with the "middle class", the "upper class" or "no class" voting for left-wing (socialist, social democratic, communist, and green) parties.

**Figure CF2 - The decline of self-perceived class cleavages in Western democracies (after controls)**

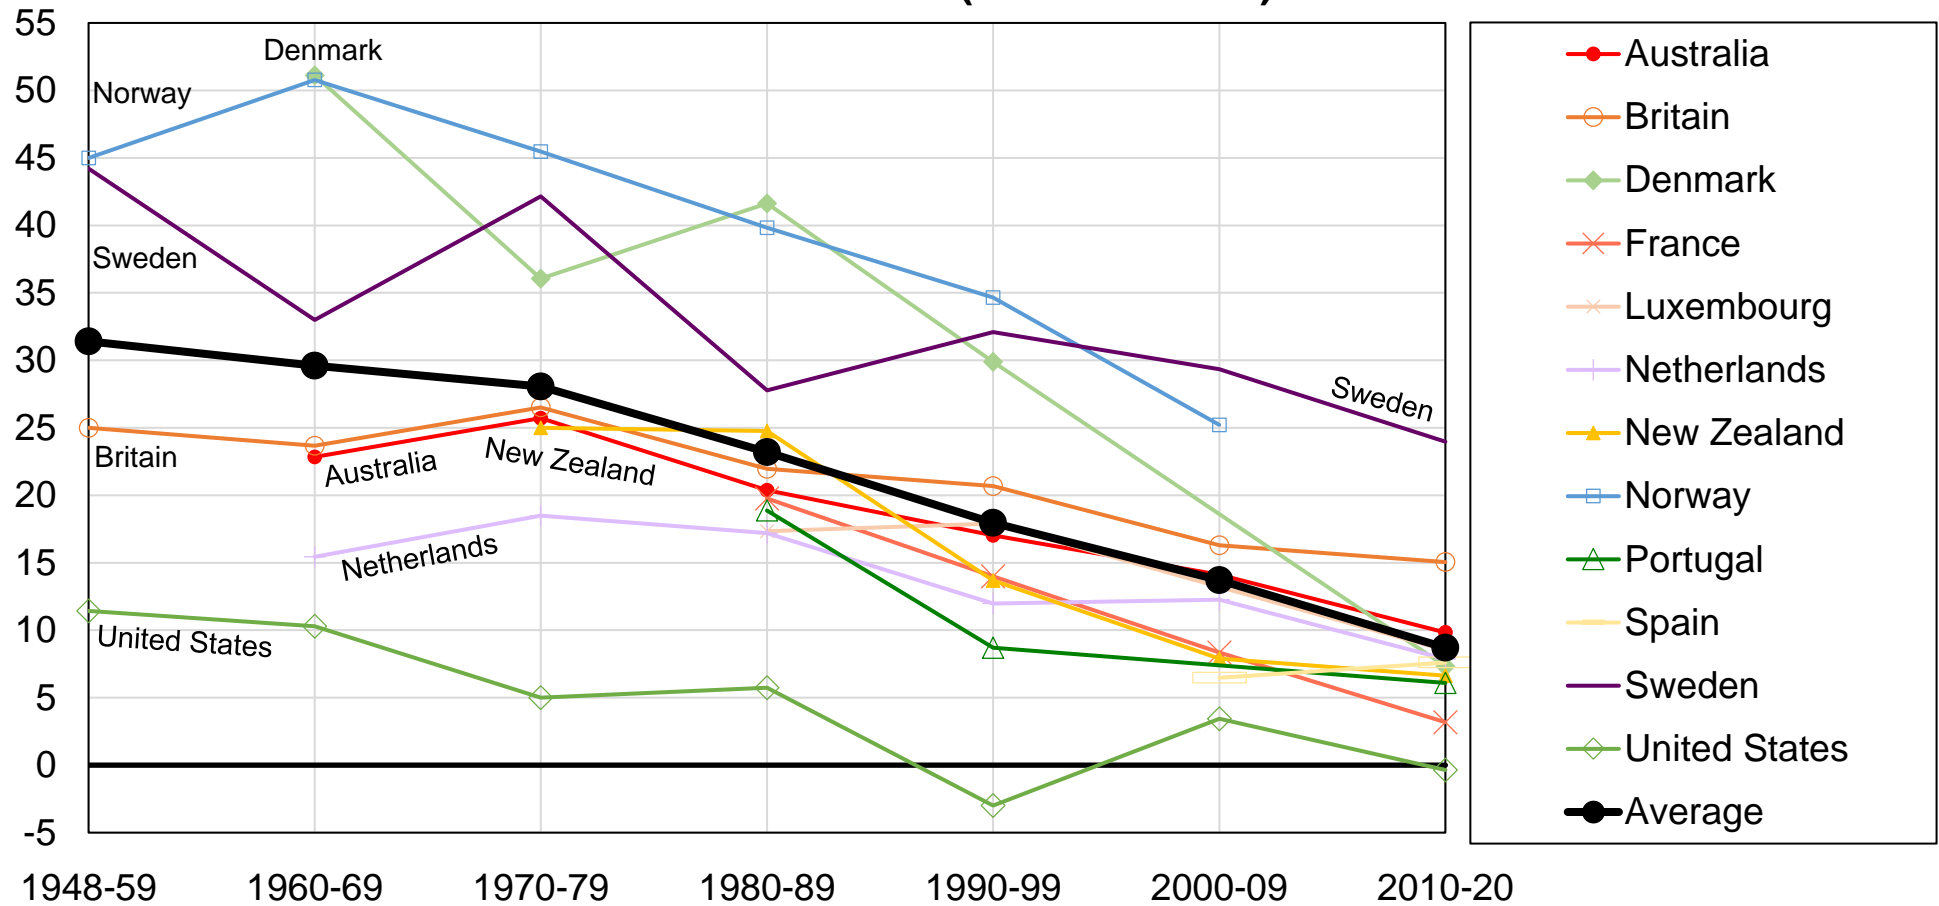

**Source:** authors' computations using the World Political Cleavages and Inequality Database.

**Note:** the figure shows the difference between the share of voters self-identifying as belonging to the "working class" or the "lower class" and the share of voters identifying with the "middle class", the "upper class" or "no class" voting for social democratic / socialist / communist / green parties. Self-perceived class cleavages have declined significantly over the past decades. Estimates control for income, education, age, gender, religion, church attendance, rural/urban, region, race/ethnicity, employment status, and marital status (in country-years for which these variables are available).

**Figure CF3 - Vote for green parties by self-perceived class**

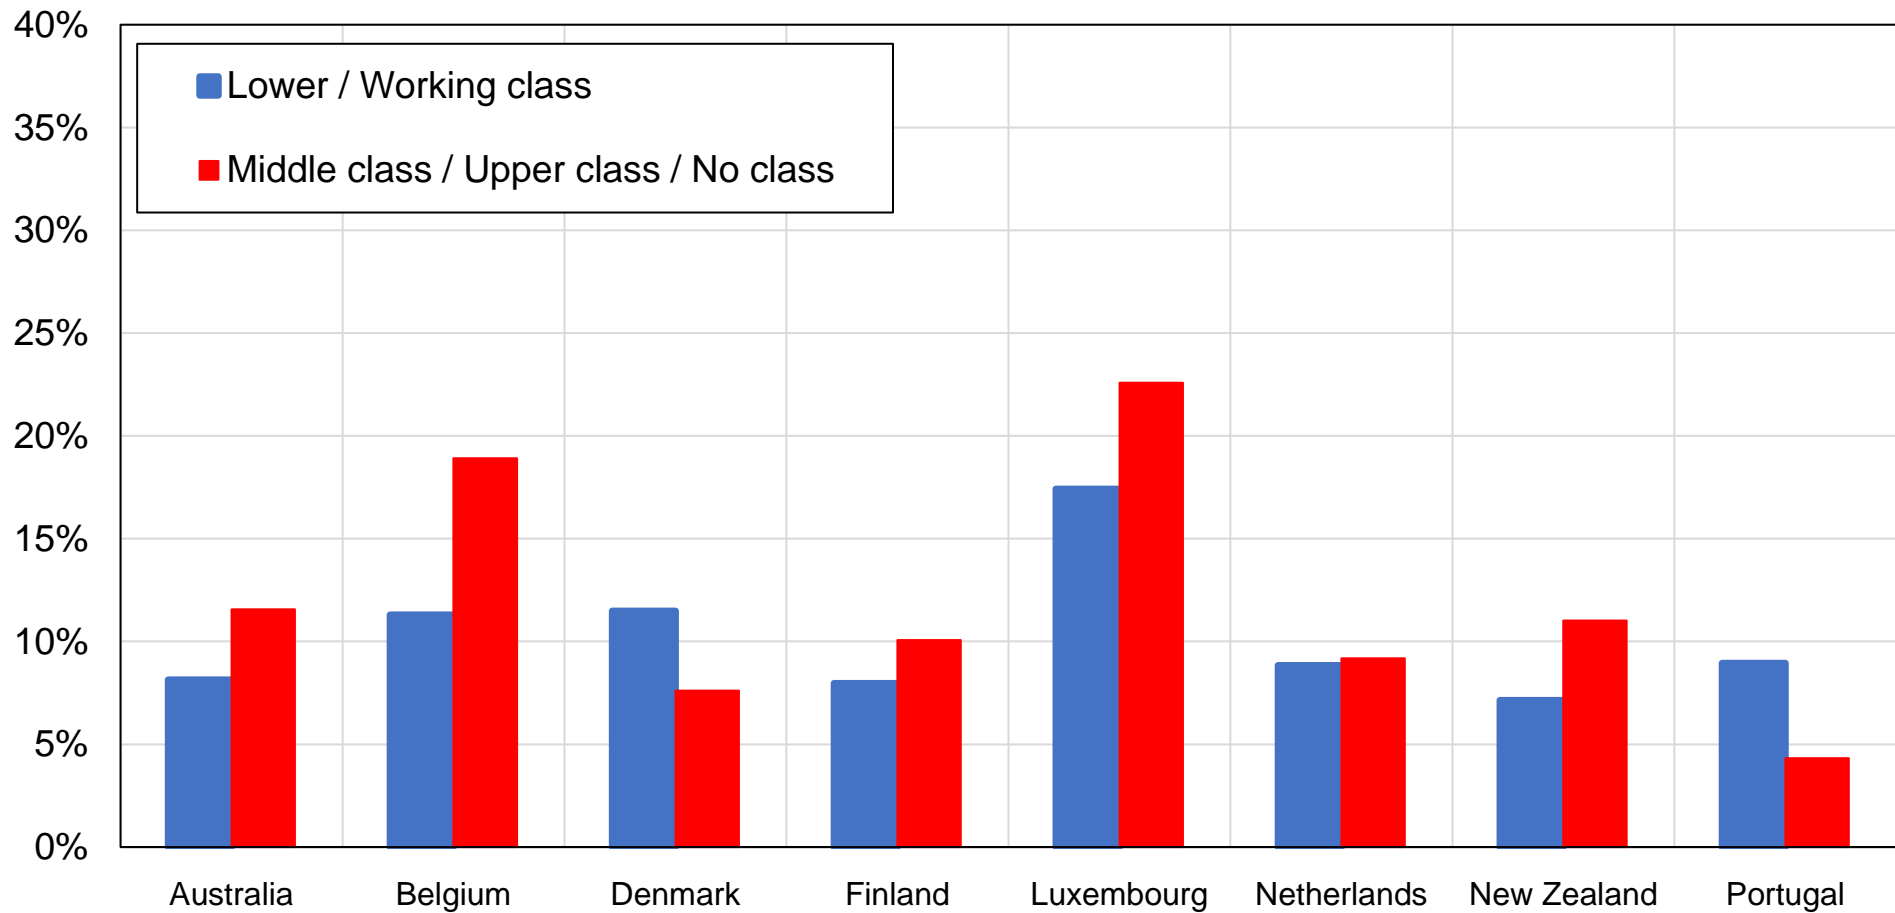

**Source:** authors' computations using the World Political Cleavages and Inequality Database.

**Note:** the figure shows the share of votes received by Green parties in Western democracies in the last election available by self-perceived social class.



**Figure CF4 - Vote for anti-immigration parties by self-perceived class**

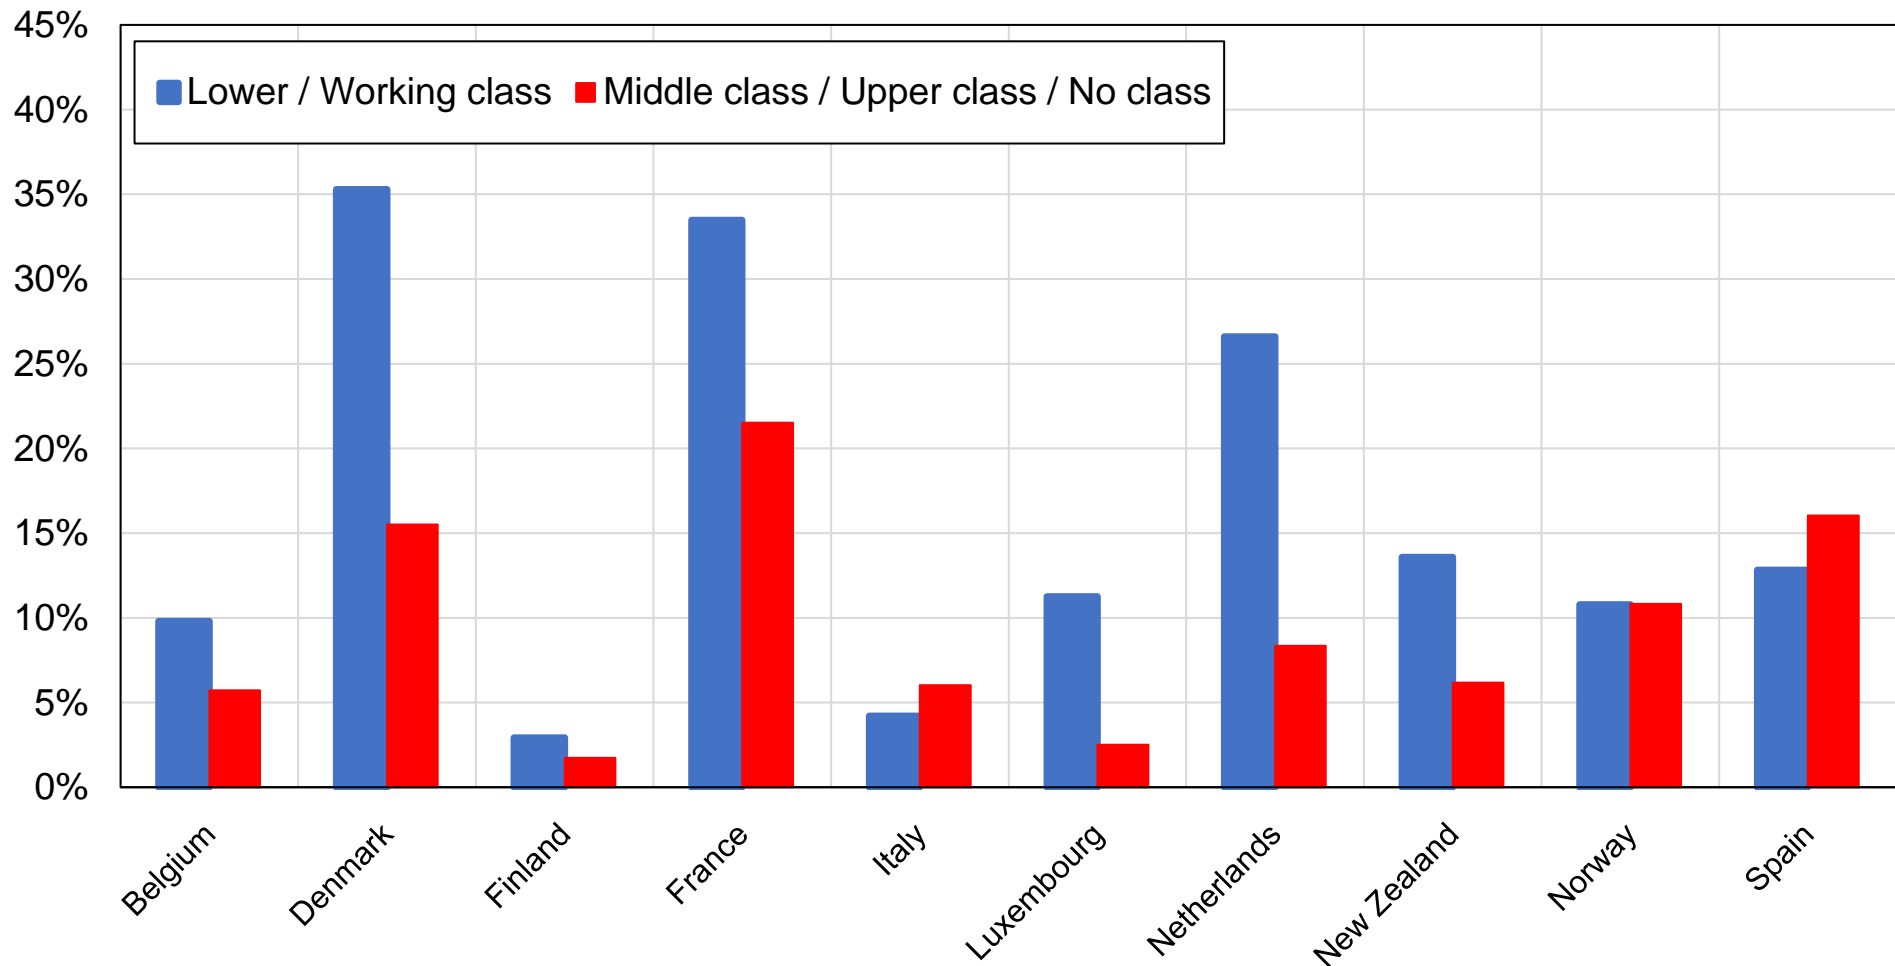

**Source:** authors' computations using the World Political Cleavages and Inequality Database.

**Note:** the figure shows the share of votes received by anti-immigration parties in Western democracies in the last election available by self-perceived social class.

**Figure CF5 - Vote for left-wing parties among union members in Western democracies**

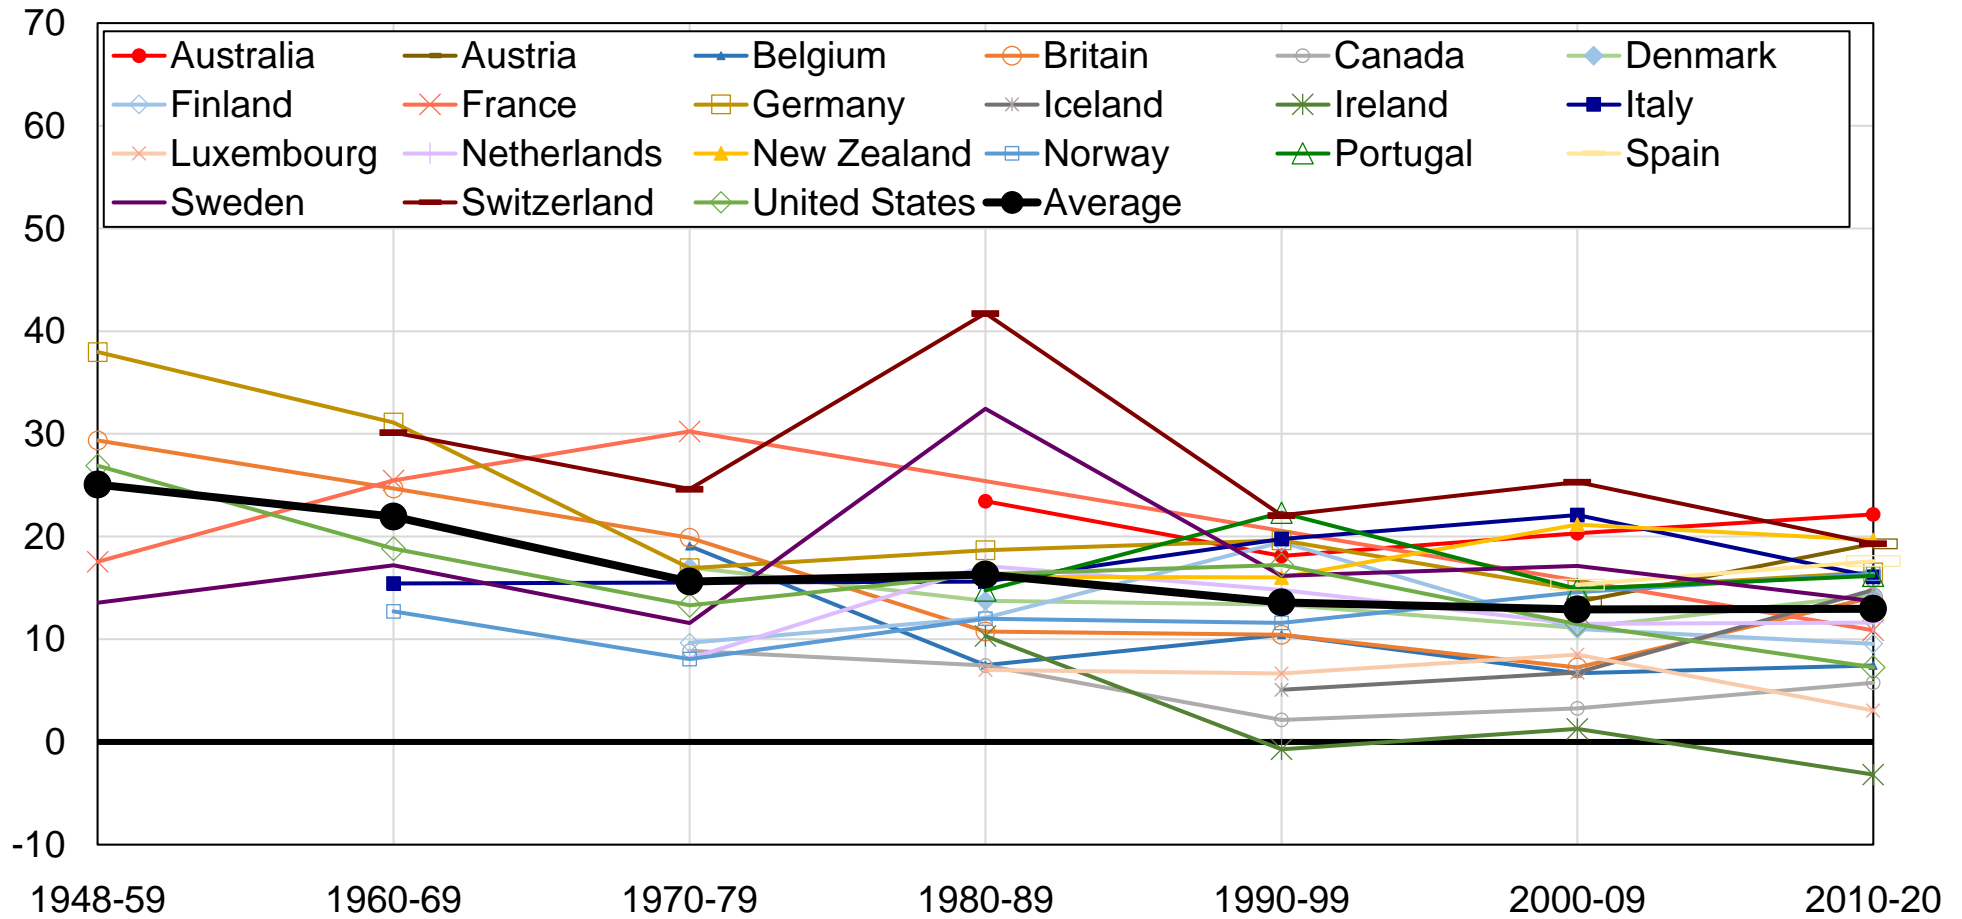

**Source:** authors' computations using the World Political Cleavages and Inequality Database.

**Note:** the figure represents the difference between the share of union members and the share of non-union members voting for social democratic, socialist, communist, and green parties in Western democracies.

**Figure CF6 - Vote for left-wing parties among union members in Western democracies, after controls**

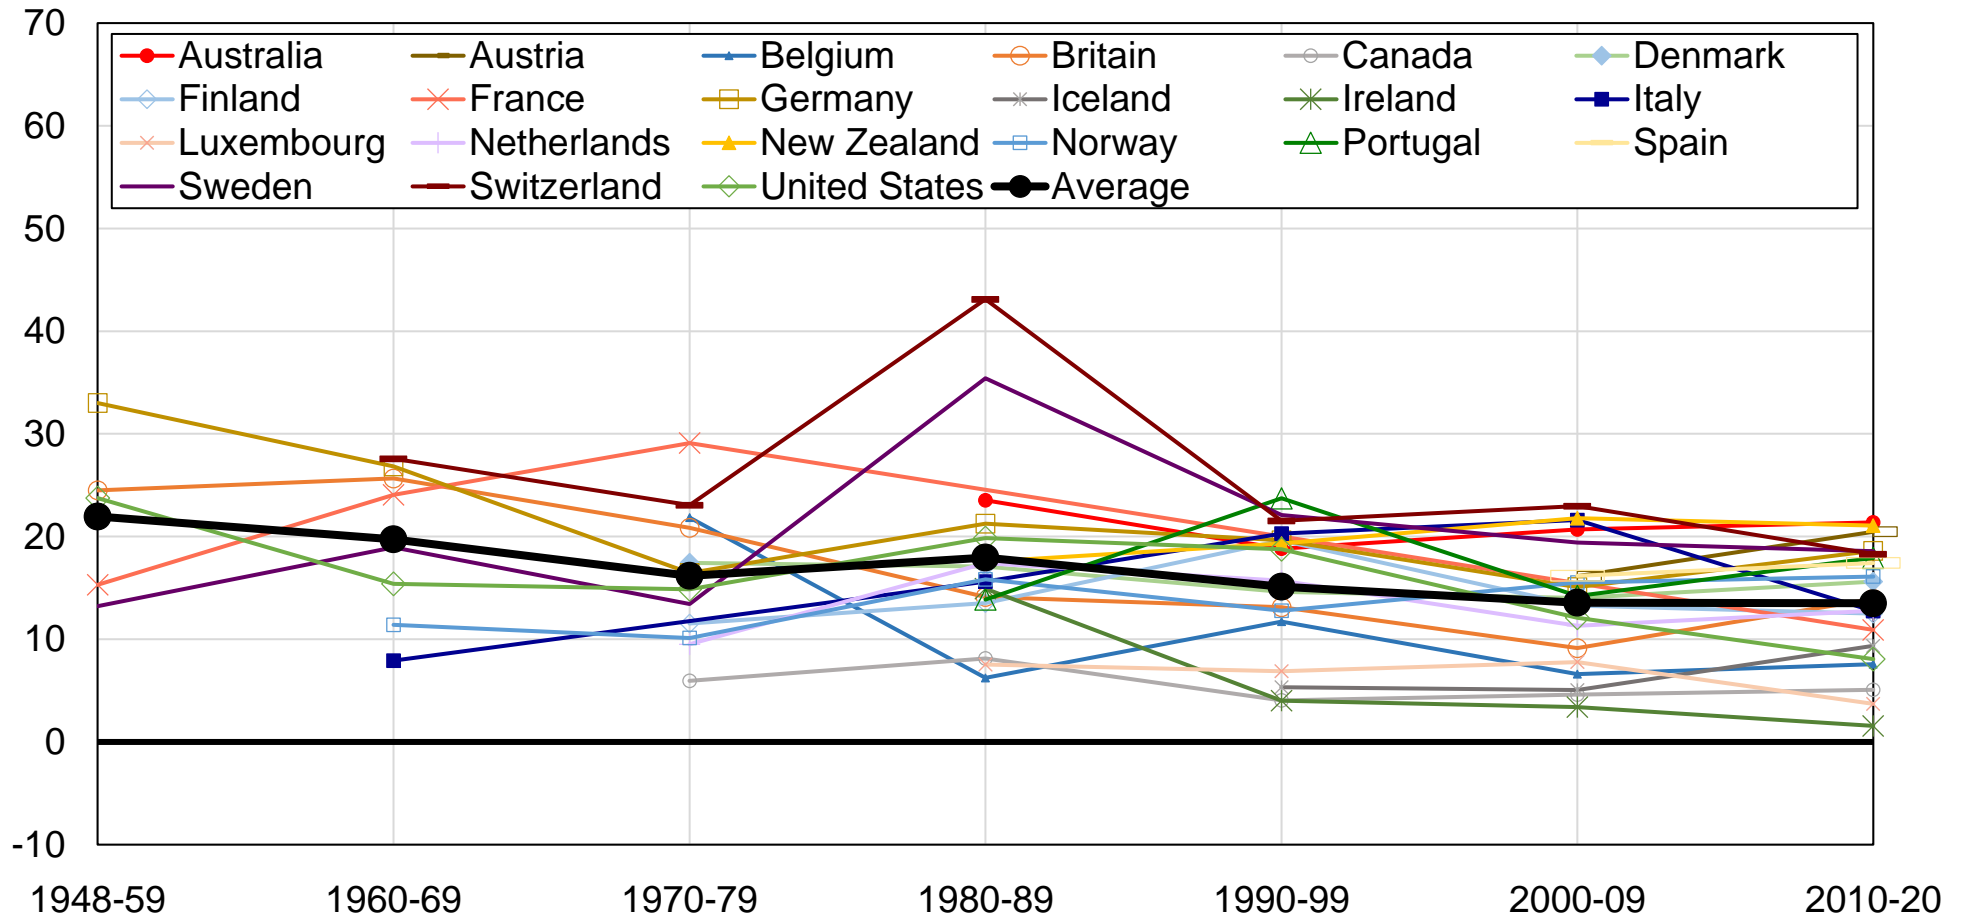

**Source:** authors' computations using the World Political Cleavages and Inequality Database.

**Note:** the figure represents the difference between the share of union members and the share of non-union members voting for social democratic, socialist, communist, and green parties in Western democracies. Estimates control for education, income, age, gender, religion, church attendance, rural/urban, region, employment status, and marital status (in country-years for which these variables are available).

**Figure CF7 - Vote for left-wing parties among public sector workers in Western democracies**

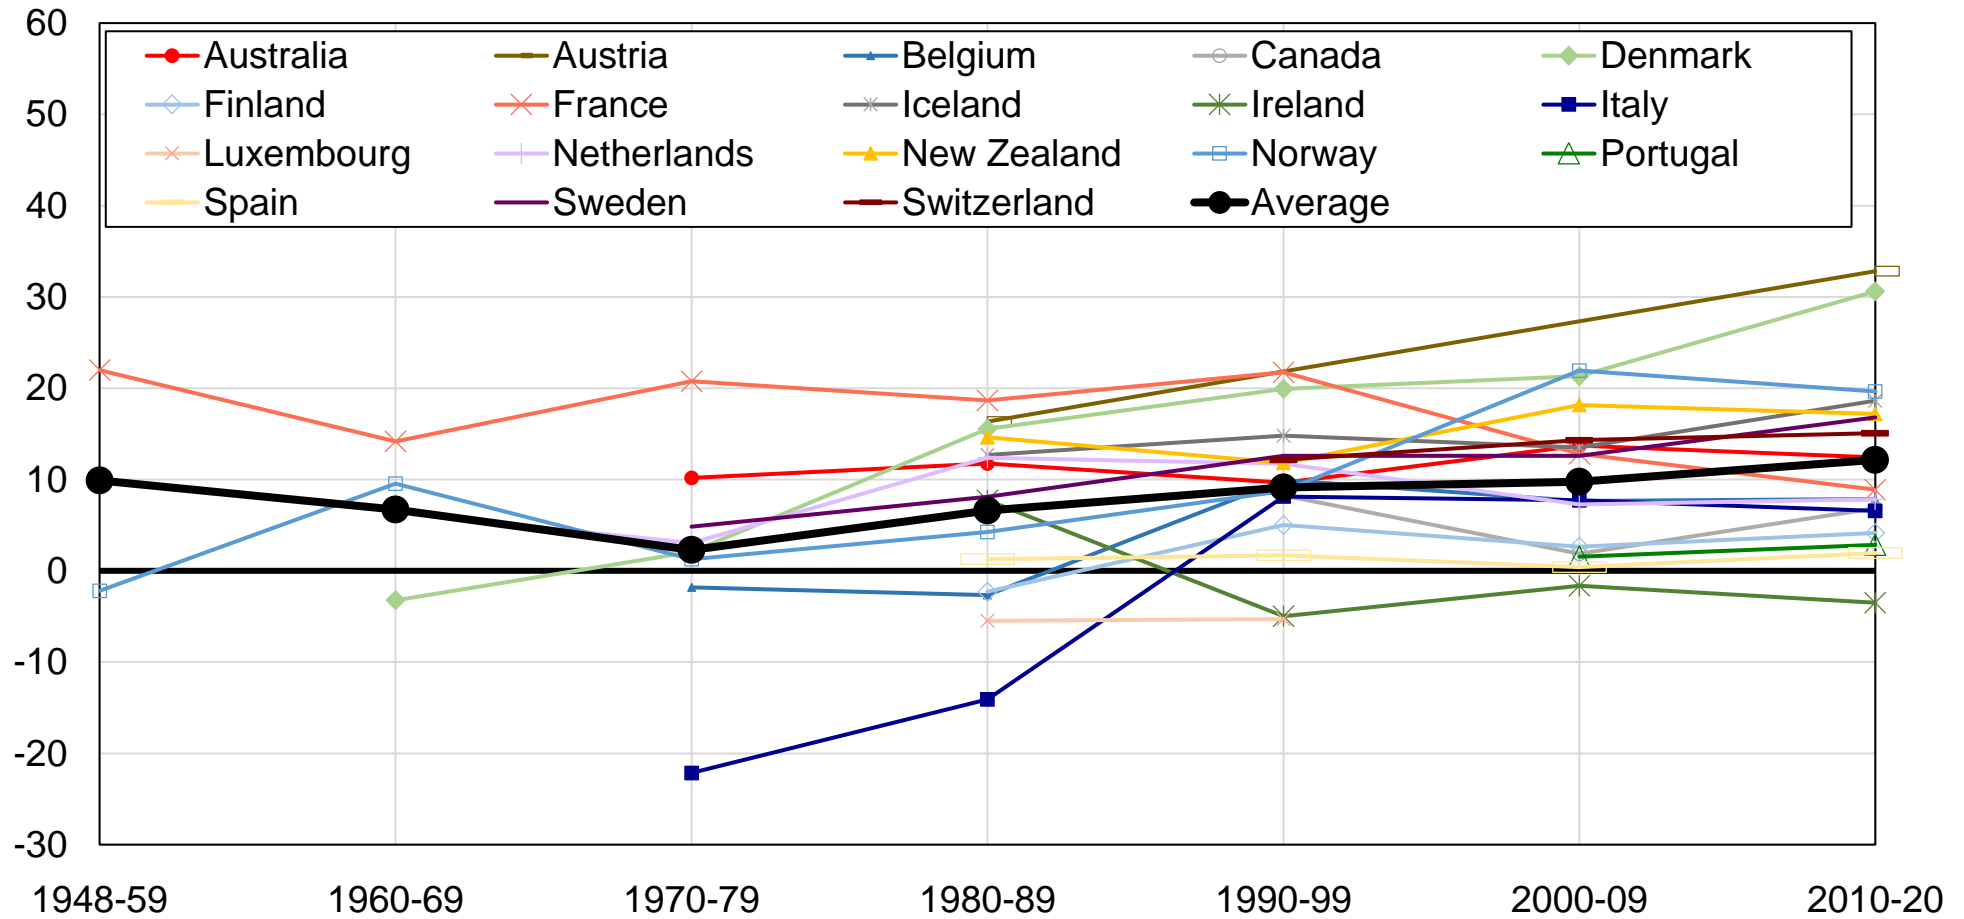

**Source:** authors' computations using the World Political Cleavages and Inequality Database.

**Note:** the figure represents the difference between the share of public sector workers and the share of private sector workers voting for social democratic, socialist, communist, and green parties in Western democracies.

**Figure CF8 - Vote for left-wing parties among public sector workers in Western democracies, after controls**

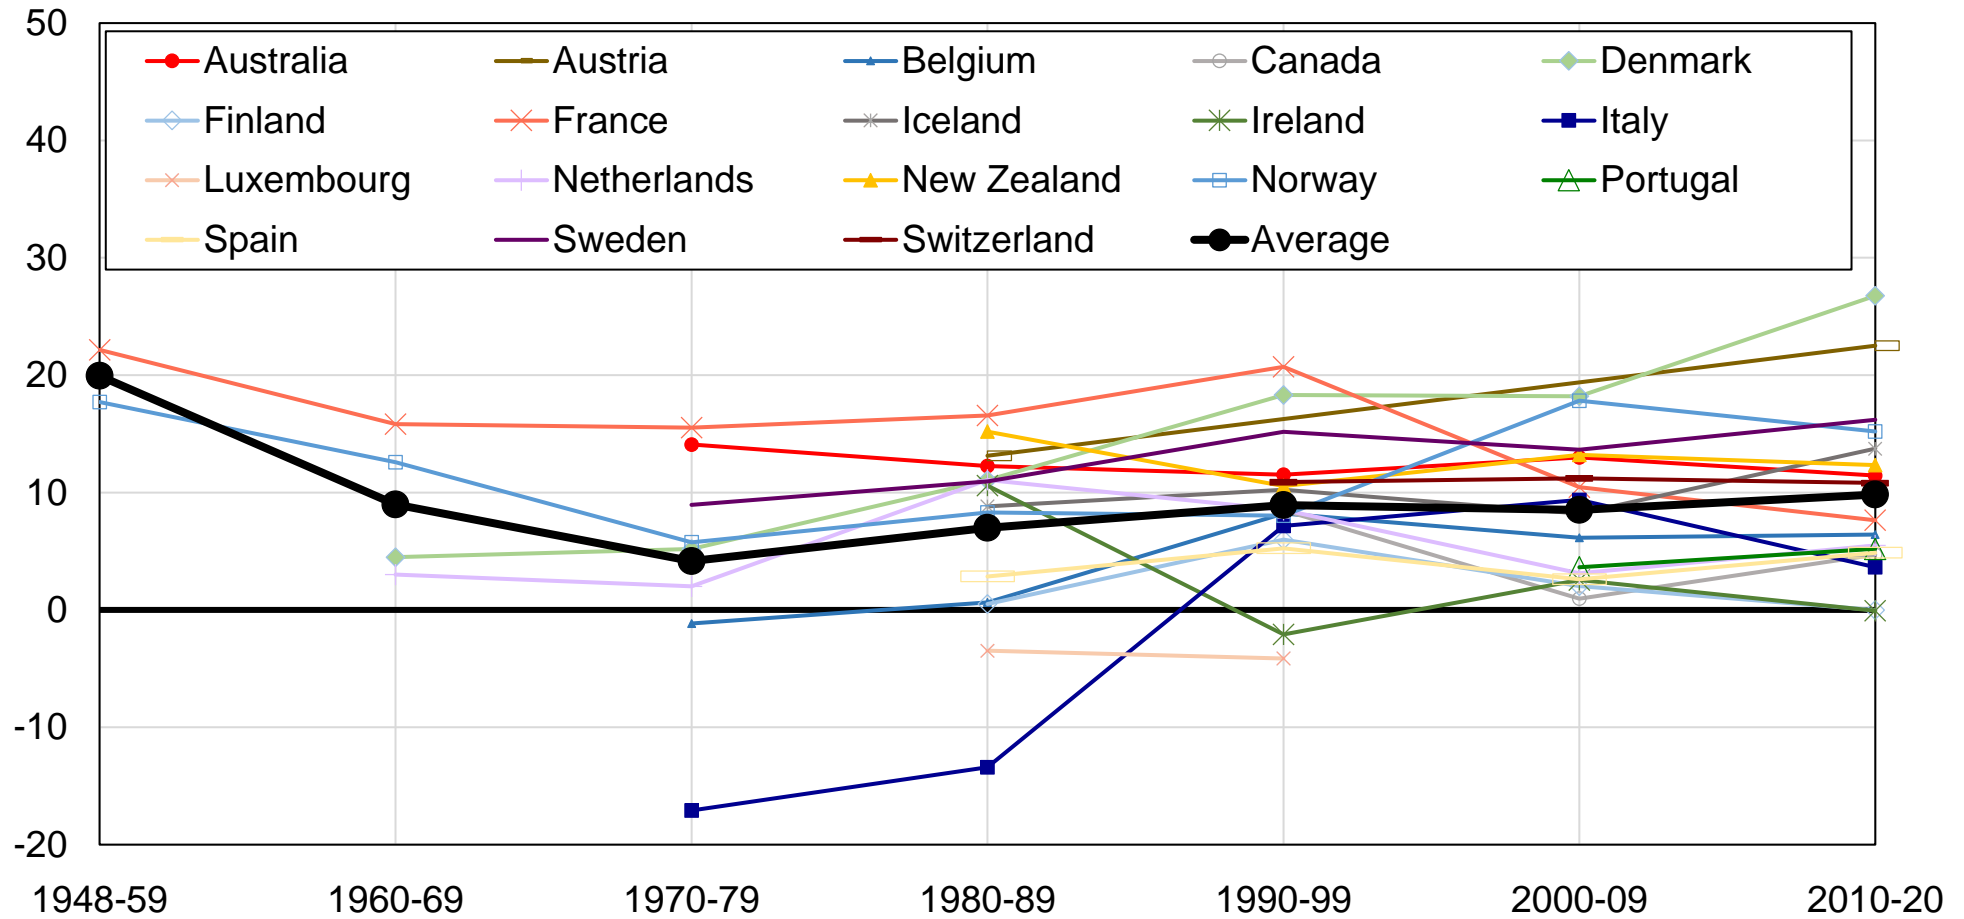

**Source:** authors' computations using the World Political Cleavages and Inequality Database.

**Note:** the figure represents the difference between the share of public sector workers and the share of private sector workers voting for social democratic, socialist, communist, and green parties in Western democracies. Estimates control for education, income, age, gender, religion, church attendance, rural/urban, region, employment status, and marital status (in country-years for which these variables are available).

**Figure CF9 - Vote for left-wing parties among homeowners in Western democracies**

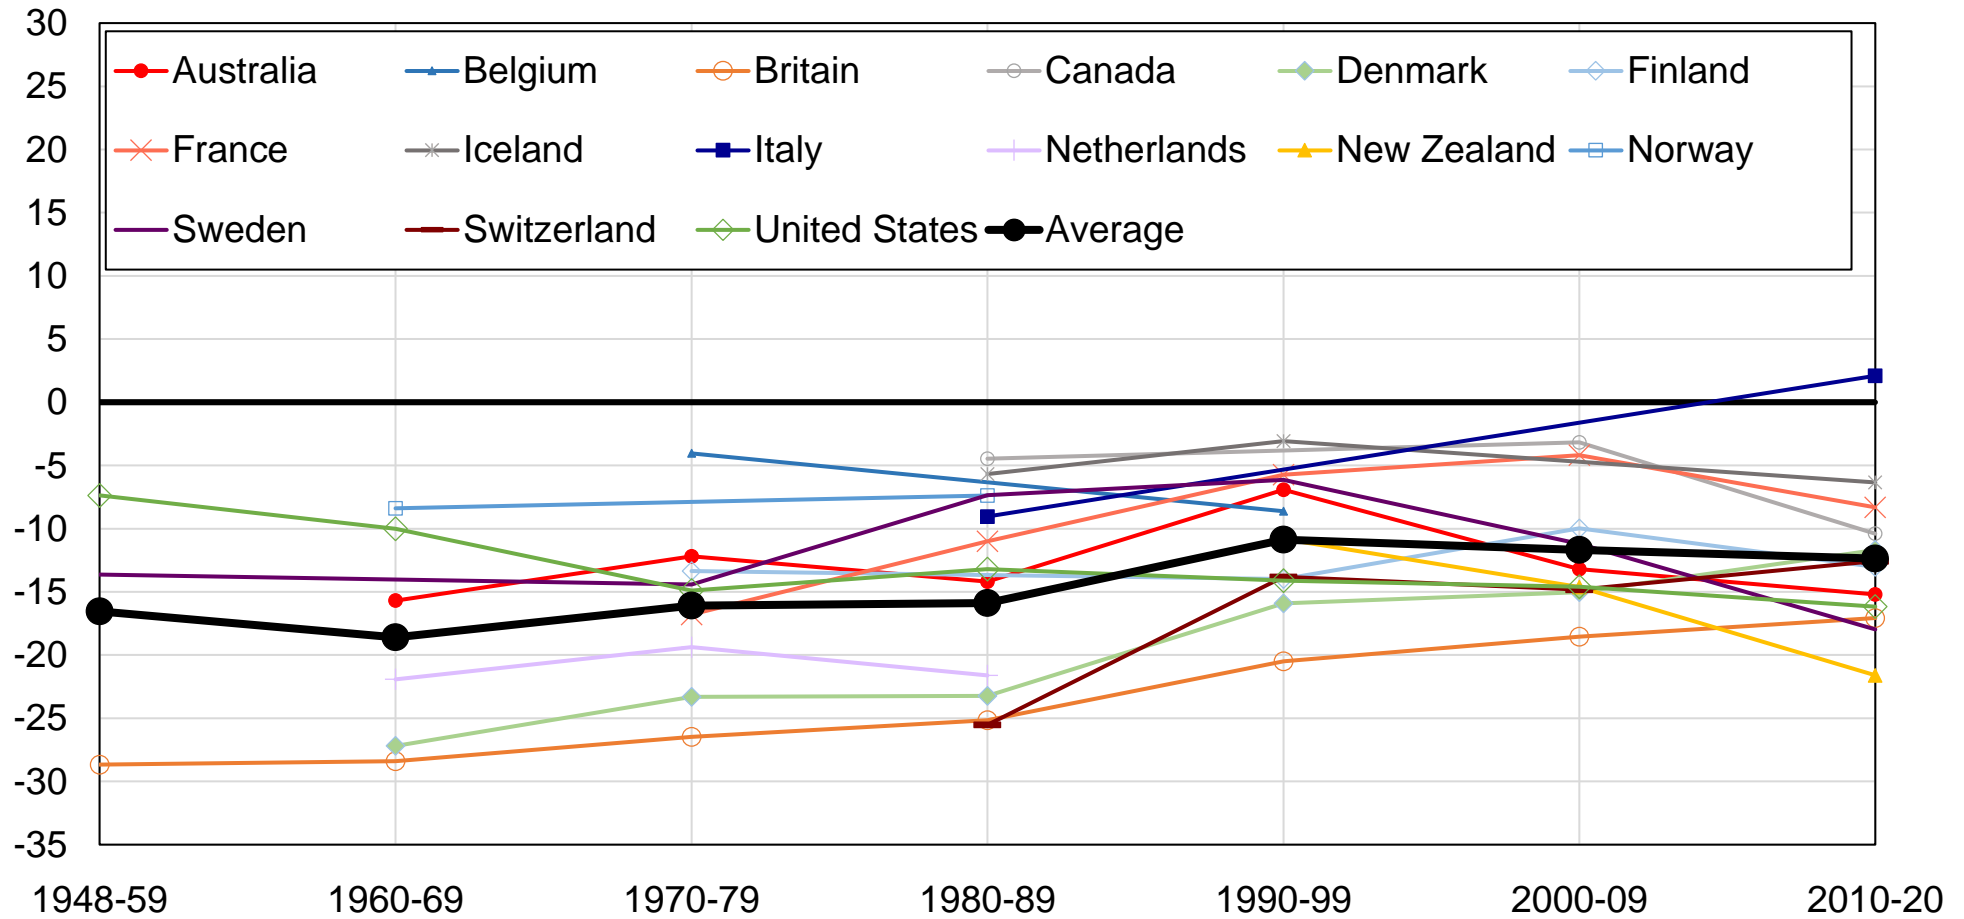

**Source:** authors' computations using the World Political Cleavages and Inequality Database.

**Note:** the figure represents the difference between the share of homeowners and the share of renters voting for social democratic, socialist, communist, and green parties in Western democracies.

**Figure CF10 - Vote for left-wing parties among homeowners in Western democracies, after controls**

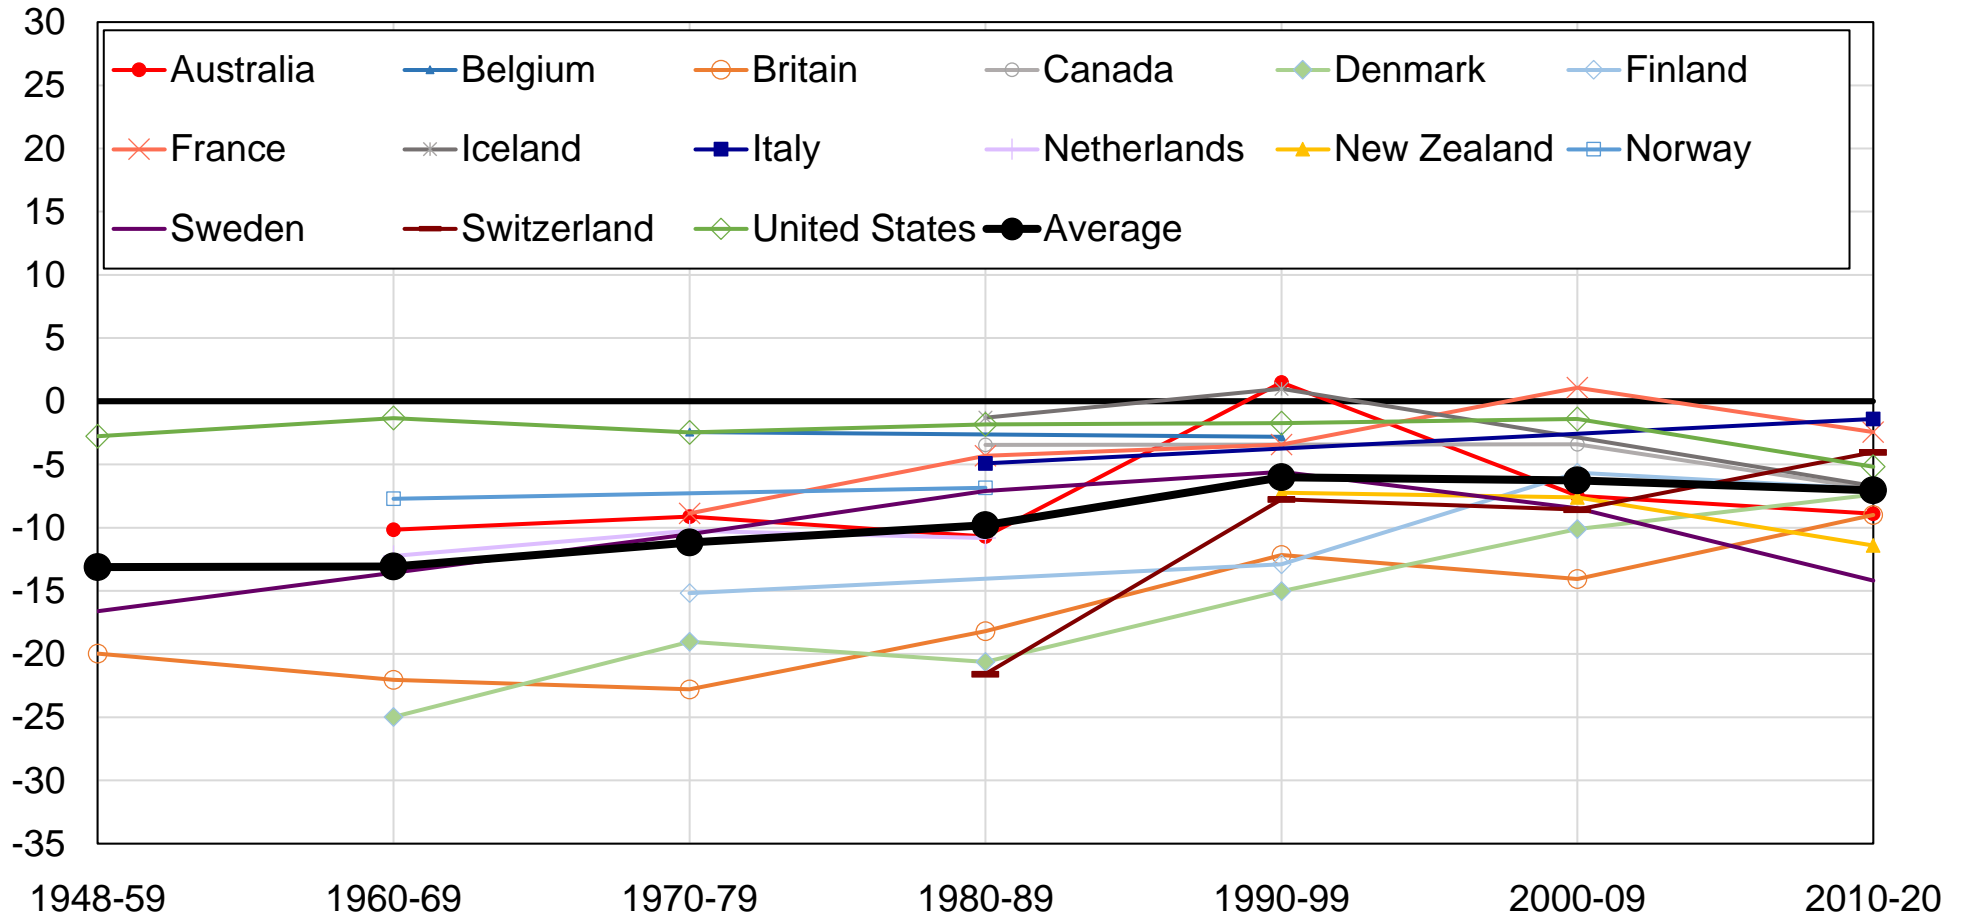

**Source:** authors' computations using the World Political Cleavages and Inequality Database.

**Note:** the figure represents the difference between the share of homeowners and the share of renters voting for social democratic, socialist, communist, and green parties in Western democracies. Estimates control for education, income, age, gender, religion, church attendance, rural/urban, region, employment status, and marital status (in country-years for which these variables are available).

**Table D1 - Marginal effect of belonging to top 10% educated voters on support for social democratic and affiliated parties by country and decade, after controls**

|             | 1948-59           | 1960-69           | 1970-79           | 1980-89           | 1990-99          | 2000-09          | 2010-2020        |
|-------------|-------------------|-------------------|-------------------|-------------------|------------------|------------------|------------------|
| Australia   |                   | -13.3***<br>(2.4) | -4.8<br>(3.3)     | -3.2<br>(2.3)     | -3.0*<br>(1.7)   | 10.6***<br>(2.3) | 5.9***<br>(1.4)  |
| Austria     |                   |                   | -15.5***<br>(4.3) | -10.4***<br>(3.3) | -2.4<br>(2.6)    | -2.4<br>(2.7)    | 12.8***<br>(3.3) |
| Belgium     |                   |                   | -10.6***<br>(1.5) | -8.2***<br>(1.5)  | 0.4<br>(1.5)     | 1.2<br>(1.1)     | 2.1*<br>(1.3)    |
| Canada      |                   | 3.1<br>(3.0)      | -2.0<br>(2.9)     | -0.7<br>(1.9)     | 5.8***<br>(2.0)  | 6.9***<br>(1.9)  | 7.7***<br>(1.7)  |
| Denmark     |                   | -15.3***<br>(3.5) | -7.9***<br>(2.0)  | -1.2<br>(1.7)     | -0.8<br>(1.2)    | 5.0***<br>(0.9)  | 4.1***<br>(1.5)  |
| Finland     |                   |                   | -19.0***<br>(2.2) | -14.6***<br>(2.1) | -8.4***<br>(1.8) | -5.6***<br>(1.6) | -2.6*<br>(1.4)   |
| France      | -18.2***<br>(3.5) | -2.5<br>(2.2)     | -4.8***<br>(1.4)  | -0.0<br>(1.7)     | 8.1***<br>(1.6)  | 4.8***<br>(1.6)  | 10.2***<br>(1.6) |
| Germany     | -15.1***<br>(2.2) | -12.9***<br>(2.7) | -18.4***<br>(3.8) | -6.8*<br>(3.5)    | 3.1<br>(2.4)     | 4.2*<br>(2.4)    | 10.3***<br>(2.7) |
| Iceland     |                   |                   | 6.7<br>(5.7)      | -0.1<br>(3.1)     | 9.7***<br>(2.4)  | 5.6***<br>(1.5)  | 4.4***<br>(1.0)  |
| Ireland     |                   |                   | -13.3***<br>(2.3) | -11.4***<br>(1.4) | -6.6***<br>(2.0) | -3.1*<br>(1.7)   | -5.2***<br>(1.4) |
| Italy       | -9.9**<br>(4.9)   | -0.9<br>(2.4)     | -4.5<br>(2.9)     | 3.2<br>(2.4)      | 2.0<br>(1.8)     | 4.8**<br>(2.3)   | 5.2*<br>(2.8)    |
| Luxembourg  |                   |                   | -16.0***<br>(3.1) | -5.1**<br>(2.5)   | -0.6<br>(1.8)    | 7.4<br>(4.9)     | 5.5<br>(5.0)     |
| Netherlands |                   | -1.8<br>(3.4)     | -7.3***<br>(2.1)  | 1.9<br>(1.6)      | 11.5***<br>(2.0) | 10.8***<br>(2.1) | 10.7***<br>(1.4) |
| New Zealand |                   |                   | 0.6<br>(2.3)      | -5.8*<br>(3.3)    | 2.3<br>(1.5)     | 12.7***<br>(1.8) | 14.1***<br>(1.7) |
| Norway      | -30.7***          | -33.1***          | -16.8***          | -12.0***          | -3.6**           | 3.2***           | 2.7***           |



|                |          |          |          |          |          |         |          |
|----------------|----------|----------|----------|----------|----------|---------|----------|
|                | (3.3)    | (2.6)    | (2.2)    | (1.5)    | (1.5)    | (1.0)   | (1.0)    |
| Portugal       |          |          |          | -8.9     | -5.9     | -8.1*** | -16.4*** |
|                |          |          |          | (5.4)    | (5.2)    | (2.5)   | (3.8)    |
| Spain          |          |          |          | -9.9***  | -12.5*** | -6.1*** | -1.8**   |
|                |          |          |          | (1.4)    | (1.9)    | (1.3)   | (0.7)    |
| Sweden         | -35.5*** | -33.2*** | -23.4*** | -17.0*** | -9.4***  | -7.3*** | -0.9     |
|                | (2.5)    | (1.6)    | (1.6)    | (1.4)    | (1.2)    | (1.1)   | (3.2)    |
| Switzerland    |          | -15.0*** | -4.5*    | -4.5     | 4.6**    | 10.1*** | 14.1***  |
|                |          | (5.3)    | (2.7)    | (4.4)    | (2.3)    | (2.0)   | (1.2)    |
| United Kingdom | -16.6*** | -12.2*** | -10.5*** | -4.7***  | -3.2**   | -5.4*** | 2.1      |
|                | (2.6)    | (2.2)    | (1.0)    | (1.1)    | (1.4)    | (1.5)   | (1.6)    |
| United States  | -15.1*** | -10.4*** | -2.5     | 2.0      | -3.1     | 4.6**   | 17.6***  |
|                | (2.0)    | (2.3)    | (2.1)    | (1.8)    | (2.1)    | (1.9)   | (1.1)    |

**Source:** authors' computations using the World Political Cleavages and Inequality Database.

**Note:** the table reports the marginal effect of belonging to top 10% educated voters on the probability to support Social Democratic / Socialist / Green / Communist / Other left-wing parties, after controlling for income, age, gender, religion, church attendance, rural/urban, region, race/ethnicity, employment status, and marital status (in country-years for which these variables are available). The original survey dataset is duplicated for each education category to approximate education deciles (see methodology). Robust standard errors clustered at the individual level. Coefficient standard errors in parenthesis. \* p<0.10, \*\* p<0.05, \*\*\* p<0.01.

**Table D2 - Marginal effect of belonging to top 10% income voters on support for social democratic and affiliated parties by country and decade, after controls**

|             | 1948-59           | 1960-69           | 1970-79           | 1980-89           | 1990-99           | 2000-09           | 2010-2020         |
|-------------|-------------------|-------------------|-------------------|-------------------|-------------------|-------------------|-------------------|
| Australia   |                   | -24.2***<br>(2.7) | -20.6***<br>(3.8) | -12.2***<br>(3.7) | -13.4***<br>(2.0) | -10.5***<br>(2.2) | -10.5***<br>(1.8) |
| Austria     |                   |                   | -17.9***<br>(4.0) | -7.4**<br>(3.6)   | -2.4<br>(3.0)     | -8.4*<br>(4.9)    | -8.5**<br>(3.4)   |
| Belgium     |                   |                   | -5.7***<br>(1.6)  | -9.8***<br>(1.6)  | -9.3***<br>(1.5)  | -6.2***<br>(1.7)  | -7.8***<br>(1.7)  |
| Canada      |                   | 5.3*<br>(2.9)     | -8.6***<br>(2.5)  | -7.0***<br>(2.1)  | -3.1<br>(2.7)     | -5.4***<br>(2.0)  | -7.0***<br>(1.8)  |
| Denmark     |                   | -12.6***<br>(4.7) | -14.9***<br>(2.3) | -22.2***<br>(1.9) | -19.8***<br>(2.0) | -14.5***<br>(1.9) | -14.6***<br>(2.8) |
| Finland     |                   |                   | -12.0***<br>(2.4) | -15.0***<br>(2.1) | -7.3***<br>(2.1)  | -4.1*<br>(2.2)    | -6.7***<br>(1.9)  |
| France      | -0.8<br>(5.7)     | -11.2***<br>(2.8) | -14.7***<br>(1.6) | -12.0***<br>(1.8) | -10.4***<br>(1.8) | -6.1***<br>(1.5)  | -8.8***<br>(2.6)  |
| Germany     | -11.4***<br>(2.0) | -17.7***<br>(2.4) | -12.1***<br>(3.9) |                   | -11.8***<br>(4.2) | -10.1***<br>(2.8) | -13.8***<br>(3.4) |
| Iceland     |                   |                   |                   | -4.0<br>(3.1)     | -0.7<br>(1.9)     | -6.2***<br>(1.9)  | -7.1***<br>(1.6)  |
| Ireland     |                   |                   | -6.7***<br>(2.5)  | -8.1***<br>(1.3)  | -10.6***<br>(2.7) | -1.3<br>(3.1)     | -7.0***<br>(2.4)  |
| Italy       | 2.2<br>(8.7)      | -6.6**<br>(3.3)   | -1.4<br>(4.4)     | -1.5<br>(3.8)     |                   | -3.0<br>(5.6)     | 4.6***<br>(1.5)   |
| Luxembourg  |                   |                   | -7.8***<br>(2.9)  | -7.6***<br>(2.4)  | -5.0***<br>(1.6)  | -18.2***<br>(6.1) |                   |
| Netherlands |                   | -18.0***<br>(3.5) | -17.6***<br>(2.8) | -16.0***<br>(2.0) | -13.8***<br>(2.4) | -15.2***<br>(2.4) | -8.7***<br>(1.9)  |
| New Zealand |                   |                   | -19.9***<br>(2.8) | -6.4**<br>(3.2)   | -11.8***<br>(1.8) | -11.3***<br>(2.5) | -12.2***<br>(2.4) |
| Norway      | -22.6***          | -20.5***          | -15.9***          | -22.0***          | -12.9***          | -13.4***          | -15.6***          |

|                |          |          |          |          |          |          |          |
|----------------|----------|----------|----------|----------|----------|----------|----------|
|                | (4.1)    | (2.6)    | (2.0)    | (2.0)    | (2.8)    | (2.2)    | (2.5)    |
| Portugal       |          |          |          | -14.6*   | -11.6*   | -11.0*** | -7.7     |
|                |          |          |          | (7.6)    | (6.0)    | (2.6)    | (5.6)    |
| Spain          |          |          |          | -15.6*** |          | -8.6***  | -5.9***  |
|                |          |          |          | (3.2)    |          | (1.5)    | (1.4)    |
| Sweden         | -16.3*** | -8.4***  | -17.2*** | -8.2***  | -12.0*** | -15.7*** | -17.4*** |
|                | (3.7)    | (1.6)    | (1.9)    | (1.3)    | (1.9)    | (1.8)    | (2.3)    |
| Switzerland    |          |          | -11.9*** |          | -7.2***  | -11.7*** | -5.6***  |
|                |          |          | (4.1)    |          | (2.3)    | (2.1)    | (1.5)    |
| United Kingdom | -23.7*** | -31.3*** | -15.6*** | -15.3*** | -10.0*** | -6.8***  | -7.6***  |
|                | (2.9)    | (2.1)    | (1.2)    | (1.2)    | (1.6)    | (1.8)    | (1.9)    |
| United States  | -9.6***  | -8.2***  | -12.8*** | -13.1*** | -7.7***  | -11.1*** | -0.0     |
|                | (2.2)    | (2.4)    | (2.2)    | (2.1)    | (2.7)    | (2.8)    | (1.9)    |

**Source:** authors' computations using the World Political Cleavages and Inequality Database.

**Note:** the table reports the marginal effect of belonging to top 10% income voters on the probability to support Social Democratic / Socialist / Communist / Green / Other left-wing parties, after controlling for education, age, gender, religion, church attendance, rural/urban, region, race/ethnicity, employment status, and marital status (in country-years for which these variables are available). The original survey dataset is duplicated for each income bracket to approximate income deciles (see methodology). Robust standard errors clustered at the individual level. Coefficient standard errors in parenthesis. \*  $p < 0.10$ , \*\*  $p < 0.05$ , \*\*\*  $p < 0.01$ .

**Table D3 - Marginal effect of belonging to top 10% educated voters on support for specific families of parties by country, 2010-2020, after controls**

|             | <b>Social Democratic / Socialist<br/>/ Communist / Other left</b> | <b>Conservative / Christian<br/>Democratic / Liberal</b> | <b>Green</b>     | <b>Anti-immigration</b> |
|-------------|-------------------------------------------------------------------|----------------------------------------------------------|------------------|-------------------------|
| Australia   | 1.1<br>(1.4)                                                      | -7.0***<br>(1.4)                                         | 4.8***<br>(1.1)  | -0.2**<br>(0.1)         |
| Austria     | 3.2<br>(3.1)                                                      | 3.8<br>(3.2)                                             | 9.6***<br>(2.4)  | -16.4***<br>(2.4)       |
| Belgium     | -4.3***<br>(1.1)                                                  | 0.1<br>(1.3)                                             | 6.3***<br>(0.9)  | -2.0***<br>(0.4)        |
| Canada      | 6.1***<br>(1.7)                                                   | -8.2***<br>(1.6)                                         | 1.7**<br>(0.7)   |                         |
| Denmark     | 3.5**<br>(1.4)                                                    | 1.0<br>(1.4)                                             | 0.6<br>(0.8)     | -5.0***<br>(0.9)        |
| Finland     | -6.3***<br>(1.3)                                                  | 9.7***<br>(1.5)                                          | 3.7***<br>(0.9)  | -7.9***<br>(1.2)        |
| France      | 9.0***<br>(1.6)                                                   | -2.0<br>(1.5)                                            | 1.2**<br>(0.5)   | -11.7***<br>(1.3)       |
| Germany     | -0.6<br>(2.4)                                                     | -7.7***<br>(2.6)                                         | 11.1***<br>(2.2) | -1.6<br>(1.1)           |
| Iceland     | 2.0**<br>(0.8)                                                    | -5.1***<br>(1.0)                                         | 2.4***<br>(0.7)  |                         |
| Ireland     | -6.0***<br>(1.5)                                                  | 4.0***<br>(1.4)                                          | 0.8<br>(0.6)     |                         |
| Italy       | 5.2*<br>(2.8)                                                     | -4.9*<br>(2.9)                                           |                  | (2.1)                   |
| Luxembourg  | -0.7<br>(5.0)                                                     | -4.0<br>(5.0)                                            | 6.1<br>(4.7)     | -1.3<br>(1.7)           |
| Netherlands | 6.6***<br>(1.4)                                                   | -2.3*<br>(1.4)                                           | 4.1***<br>(0.8)  | -8.0***<br>(0.7)        |
| New Zealand | 6.0***                                                            | -14.7***                                                 | 8.1***           | -1.2                    |

|                |          |          |        |          |
|----------------|----------|----------|--------|----------|
|                | (1.6)    | (1.7)    | (1.1)  | (0.7)    |
| Norway         | 1.8*     | -0.8     | 0.9**  | -3.6***  |
|                | (1.0)    | (1.0)    | (0.4)  | (0.7)    |
| Portugal       | -14.1*** | 16.4***  | -2.2   |          |
|                | (3.6)    | (3.8)    | (1.7)  |          |
| Spain          | -2.1***  | 4.8***   | 0.3*** | -2.6***  |
|                | (0.7)    | (0.7)    | (0.1)  | (0.4)    |
| Sweden         | -7.5**   | 5.2      | 6.6*** | -4.3***  |
|                | (3.1)    | (3.3)    | (2.2)  | (1.2)    |
| Switzerland    | 6.2***   | -0.6     | 7.9*** | -13.0*** |
|                | (1.0)    | (1.2)    | (1.0)  | (1.0)    |
| United Kingdom | 2.1      | -10.2*** |        | -2.3***  |
|                | (1.6)    | (1.6)    |        | (0.4)    |
| United States  | 17.6***  | -17.6*** |        |          |
|                | (1.1)    | (1.1)    |        |          |

**Source:** authors' computations using the World Political Cleavages and Inequality Database.

**Note:** the table reports the marginal effect of belonging to top 10% educated voters on the probability to support specific families of parties in the 2010-2020 period, after controlling for income, age, gender, religion, church attendance, rural/urban, region, race/ethnicity, employment status, and marital status (in country-years for which these variables are available). The original survey dataset is duplicated for each education category to approximate education deciles (see methodology). Robust standard errors clustered at the individual level. Coefficient standard errors in parenthesis.

\* p<0.10, \*\* p<0.05, \*\*\* p<0.01.

**Table D4 - Marginal effect of belonging to top 10% income voters on support for specific families of parties by country, 2010-2020, after controls**

|             | <b>Social Democratic / Socialist / Communist / Other left</b> | <b>Conservative / Christian Democratic / Liberal</b> | <b>Green</b>     | <b>Anti-immigration</b> |
|-------------|---------------------------------------------------------------|------------------------------------------------------|------------------|-------------------------|
| Australia   | -7.5***<br>(1.7)                                              | 13.1***<br>(1.8)                                     | -3.0**<br>(1.2)  | -0.2<br>(0.1)           |
| Austria     | -7.3**<br>(3.2)                                               | 12.9***<br>(3.4)                                     | -1.2<br>(2.7)    | -4.4<br>(2.8)           |
| Belgium     | -5.9***<br>(1.4)                                              | 8.6***<br>(1.9)                                      | -2.0*<br>(1.2)   | -0.1<br>(0.7)           |
| Canada      | -5.4***<br>(1.8)                                              | 7.6***<br>(1.7)                                      | -1.6***<br>(0.6) |                         |
| Denmark     | -9.3***<br>(2.8)                                              | 20.7***<br>(2.9)                                     | -5.3***<br>(1.1) | -6.0***<br>(1.6)        |
| Finland     | -7.0***<br>(1.7)                                              | 9.0***<br>(1.9)                                      | 0.3<br>(1.1)     | -1.2<br>(1.5)           |
| France      | -8.2***<br>(2.6)                                              | 13.5***<br>(2.9)                                     | -0.5<br>(0.6)    | -5.1**<br>(2.1)         |
| Germany     | -12.0***<br>(3.0)                                             | 15.5***<br>(3.5)                                     | -0.3<br>(2.7)    | -0.2<br>(1.8)           |
| Iceland     | -2.4*<br>(1.3)                                                | 10.5***<br>(1.8)                                     | -4.7***<br>(1.3) |                         |
| Ireland     | -7.9***<br>(2.4)                                              | 8.1***<br>(2.4)                                      | 0.9<br>(0.9)     |                         |
| Italy       | 4.6***<br>(1.5)                                               | 0.9<br>(1.6)                                         |                  | -2.4*<br>(1.3)          |
| Netherlands | -7.1***<br>(1.8)                                              | 12.2***<br>(1.9)                                     | -1.6*<br>(0.9)   | -1.8*<br>(1.0)          |
| New Zealand | -9.9***<br>(2.3)                                              | 16.6***<br>(2.5)                                     | -2.3*<br>(1.2)   | -1.8*<br>(1.1)          |
| Norway      | -13.0***                                                      | 13.8***                                              | -2.6***          | 1.0                     |

|                |          |         |         |         |
|----------------|----------|---------|---------|---------|
|                | (2.5)    | (2.9)   | (0.7)   | (2.0)   |
| Portugal       | -4.3     | 7.7     | -3.5    |         |
|                | (5.5)    | (5.6)   | (2.4)   |         |
| Spain          | -6.0***  | 5.3***  | 0.1     | 1.5*    |
|                | (1.4)    | (1.3)   | (0.1)   | (0.8)   |
| Sweden         | -13.4*** | 19.2*** | -4.0*** | -1.8    |
|                | (2.2)    | (2.4)   | (1.2)   | (1.3)   |
| Switzerland    | -8.1***  | 9.6***  | 2.5**   | -3.2**  |
|                | (1.3)    | (1.7)   | (1.2)   | (1.4)   |
| United Kingdom | -7.6***  | 15.0*** |         | -1.9*** |
|                | (1.9)    | (2.1)   |         | (0.6)   |
| United States  | -0.0     | 0.0     |         |         |
|                | (1.9)    | (1.9)   |         |         |

**Source:** authors' computations using the World Political Cleavages and Inequality Database.

**Note:** the table reports the marginal effect of belonging to top 10% income voters on the probability to support specific families of parties in the 2010-2020 period, after controlling for education, age, gender, religion, church attendance, rural/urban, region, race/ethnicity, employment status, and marital status (in country-years for which these variables are available). The original survey dataset is duplicated for each income bracket to approximate income deciles (see methodology). Robust standard errors clustered at the individual level. Coefficient standard errors in parenthesis. \* p<0.10, \*\* p<0.05, \*\*\* p<0.01.

**Table D5 - Effect of income and education on support for more left-wing parties  
(dummy income and education variables, continuous left-right ideological index)**

|                                | (1)                   | (2)                  | (3)                  | (4)                  | (5)                  | (6)                  | (7)                  |
|--------------------------------|-----------------------|----------------------|----------------------|----------------------|----------------------|----------------------|----------------------|
|                                | 1948-1959             | 1960-69              | 1970-79              | 1980-89              | 1990-99              | 2000-09              | 2010-20              |
| Income: Top 10%                | -5.700***<br>(0.673)  | -4.505***<br>(0.430) | -5.066***<br>(0.327) | -4.213***<br>(0.267) | -3.809***<br>(0.207) | -3.255***<br>(0.191) | -3.829***<br>(0.200) |
| Education: University graduate | -10.880***<br>(1.211) | -6.278***<br>(0.614) | -2.158***<br>(0.388) | -1.060***<br>(0.251) | 1.055***<br>(0.195)  | 2.212***<br>(0.174)  | 2.264***<br>(0.165)  |
| R-squared                      | 0.35                  | 0.24                 | 0.24                 | 0.23                 | 0.34                 | 0.27                 | 0.17                 |
| Observations                   | 35196                 | 82331                | 158203               | 210450               | 170789               | 212937               | 208247               |

**Note:** The table reports the effect of income and education on support for more left-wing parties by decade across all Western democracies with available data. All estimates include election fixed effects. The dependent variable is the (inverted) left-right ideological index available from the Comparative Manifesto Project database, which theoretically ranges from -100 (most right-wing) to 100 (most left-wing). \*p<0.10, \*\*p<0.05, \*\*\*p<0.01.

**Interpretation:** in 1948-1959, higher income and higher education were both associated with support for more right-wing parties. By 2010-2020, higher income is still associated with support for more right-wing parties, but higher education is now associated with higher support for more left-wing parties.



**Table D6 - Effect of income and education on support for more left-wing parties, after controls  
(dummy income and education variables, continuous left-right ideological index)**

|                                | (1)                   | (2)                  | (3)                  | (4)                  | (5)                  | (6)                  | (7)                  |
|--------------------------------|-----------------------|----------------------|----------------------|----------------------|----------------------|----------------------|----------------------|
|                                | 1948-1959             | 1960-69              | 1970-79              | 1980-89              | 1990-99              | 2000-09              | 2010-20              |
| Income: Top 10%                | -6.445***<br>(0.673)  | -5.398***<br>(0.420) | -5.618***<br>(0.331) | -4.370***<br>(0.255) | -3.523***<br>(0.208) | -3.135***<br>(0.189) | -3.462***<br>(0.197) |
| Education: University graduate | -11.640***<br>(1.230) | -7.119***<br>(0.614) | -2.830***<br>(0.391) | -1.558***<br>(0.250) | 0.700***<br>(0.195)  | 1.734***<br>(0.174)  | 1.667***<br>(0.169)  |
| R-squared                      | 0.37                  | 0.26                 | 0.26                 | 0.25                 | 0.36                 | 0.32                 | 0.22                 |
| Observations                   | 35196                 | 82331                | 158203               | 210450               | 170789               | 212937               | 208247               |

**Note:** The table reports the effect of income and education on support for more left-wing parties by decade across all Western democracies with available data. The dependent variable is the (inverted) left-right ideological index available from the Comparative Manifesto Project database, theoretically ranging from -100 (most right-wing) to 100 (most left-wing). All estimates include election fixed effects and control for the following variables (in country-years for which they are available): age, gender, religion, church attendance, rural/urban, region, race/ethnicity, employment status, and marital status. \*p<0.10, \*\*p<0.05, \*\*\*p<0.01.

**Interpretation:** in 1948-1959, higher income and higher education were both associated with support for more right-wing parties. By 2010-2020, higher income is still associated with support for more right-wing parties, but higher education is now associated with higher support for more left-wing parties.

**Table D7 - Effect of income and education on support for more left-wing parties  
(continuous income and education variables, continuous left-right ideological index)**

|                | (1)                   | (2)                  | (3)                  | (4)                  | (5)                  | (6)                  | (7)                  |
|----------------|-----------------------|----------------------|----------------------|----------------------|----------------------|----------------------|----------------------|
|                | 1948-1959             | 1960-69              | 1970-79              | 1980-89              | 1990-99              | 2000-09              | 2010-20              |
| Income rank    | 0.422<br>(0.722)      | 1.957***<br>(0.408)  | -1.569***<br>(0.387) | -3.589***<br>(0.294) | -4.882***<br>(0.269) | -4.909***<br>(0.262) | -5.688***<br>(0.287) |
| Education rank | -10.214***<br>(0.590) | -9.269***<br>(0.382) | -5.295***<br>(0.351) | -2.413***<br>(0.266) | 1.142***<br>(0.261)  | 3.993***<br>(0.255)  | 4.649***<br>(0.281)  |
| R-squared      | 0.35                  | 0.24                 | 0.24                 | 0.23                 | 0.34                 | 0.27                 | 0.18                 |
| Observations   | 13025                 | 34028                | 70328                | 91076                | 86594                | 97681                | 100116               |

**Note:** The table reports the effect of income and education on support for more left-wing parties by decade across all Western democracies with available data. All estimates include election fixed effects. Income and education ranks/quantiles (ranging from 0 to 1) are defined discretely based on all income and education categories available in each survey. The dependent variable is the (inverted) left right ideological index available from the Comparative Manifesto Project database, which theoretically ranges from -100 (most right-wing) to 100 (most left-wing). \*p<0.10, \*\*p<0.05, \*\*\*p<0.01.

**Interpretation:** in 1948-1969, higher income and higher education were both associated with support for more right-wing parties. By 2010-2020, higher income is still associated with support for more right-wing parties, but higher education is now associated with higher support for more left-wing parties.

**Table D8 - Effect of income and education on support for more left-wing parties, after controls  
(continuous income and education variables, continuous left-right ideological index)**

|                | (1)                   | (2)                   | (3)                  | (4)                  | (5)                  | (6)                  | (7)                  |
|----------------|-----------------------|-----------------------|----------------------|----------------------|----------------------|----------------------|----------------------|
|                | 1948-1959             | 1960-69               | 1970-79              | 1980-89              | 1990-99              | 2000-09              | 2010-20              |
| Income rank    | -2.719***<br>(0.775)  | -0.766*<br>(0.437)    | -3.918***<br>(0.440) | -4.838***<br>(0.315) | -5.025***<br>(0.299) | -5.312***<br>(0.290) | -5.139***<br>(0.312) |
| Education rank | -10.066***<br>(0.607) | -10.112***<br>(0.389) | -6.448***<br>(0.360) | -3.841***<br>(0.272) | 0.291<br>(0.271)     | 3.099***<br>(0.264)  | 3.119***<br>(0.293)  |
| R-squared      | 0.37                  | 0.27                  | 0.27                 | 0.25                 | 0.36                 | 0.32                 | 0.22                 |
| Observations   | 13025                 | 34028                 | 70328                | 91076                | 86594                | 97681                | 100116               |

**Note:** The table reports the effect of income and education on support for more left-wing parties by decade across all Western democracies with available data. Income and education ranks/quantiles (ranging from 0 to 1) are defined discretely based on all income and education categories available in each survey. The dependent variable is the (inverted) left-right ideological index available from the Comparative Manifesto Project database, theoretically ranging from -100 (most right-wing) to 100 (most left-wing). All estimates include election fixed effects and control for the following variables (in country-years for which they are available): age, gender, religion, church attendance, rural/urban, region, race/ethnicity, employment status, and marital status. \*p<0.10, \*\*p<0.05, \*\*\*p<0.01.

**Interpretation:** in 1948-1959, higher income and higher education were both associated with support for more right-wing parties. By 2010-2020, higher income is still associated with support for more right-wing parties, but higher education is now associated with higher support for more left-wing parties.

**Table D9 - The reversal of educational divides, 1960-2020: before and after controls**

|                                                                | 1960-69           | 1970-79           | 1980-89          | 1990-99          | 2000-09         | 2010-20         | Difference<br>2010s-<br>1960s |
|----------------------------------------------------------------|-------------------|-------------------|------------------|------------------|-----------------|-----------------|-------------------------------|
| Raw coefficient                                                | -21.6***<br>(1.0) | -11.8***<br>(0.7) | -7.3***<br>(0.7) | -2.7***<br>(0.6) | 3.4***<br>(0.6) | 5.3***<br>(0.6) | 26,9                          |
| After controlling for income                                   | -18.0***<br>(1.0) | -9.8***<br>(0.7)  | -4.9***<br>(0.7) | -0.8<br>(0.6)    | 5.1***<br>(0.6) | 6.6***<br>(0.6) | 24,6                          |
| After controlling for the above and: Gender                    | -18.3***<br>(1.0) | -10.1***<br>(0.7) | -4.9***<br>(0.7) | -0.8<br>(0.6)    | 5.0***<br>(0.6) | 6.5***<br>(0.6) | 24,8                          |
| After controlling for the above and: Age                       | -18.9***<br>(1.0) | -11.0***<br>(0.7) | -5.9***<br>(0.7) | -1.5**<br>(0.6)  | 4.6***<br>(0.6) | 5.7***<br>(0.5) | 24,6                          |
| After controlling for the above and: Religion                  | -19.1***<br>(1.0) | -11.4***<br>(0.7) | -6.5***<br>(0.7) | -2.3***<br>(0.6) | 4.1***<br>(0.6) | 4.9***<br>(0.5) | 24,0                          |
| After controlling for the above and: Religious practice        | -18.5***<br>(1.0) | -10.9***<br>(0.7) | -5.9***<br>(0.7) | -1.8***<br>(0.6) | 4.3***<br>(0.6) | 5.1***<br>(0.5) | 23,6                          |
| After controlling for the above and: Rural/urban               | -19.2***<br>(1.0) | -11.6***<br>(0.7) | -6.5***<br>(0.7) | -2.2***<br>(0.6) | 3.8***<br>(0.6) | 4.6***<br>(0.5) | 23,8                          |
| After controlling for the above and: Region                    | -19.9***<br>(1.0) | -11.9***<br>(0.7) | -6.6***<br>(0.7) | -2.2***<br>(0.6) | 3.6***<br>(0.6) | 4.5***<br>(0.5) | 24,4                          |
| After controlling for the above and: Employment/marital status | -19.4***<br>(1.0) | -11.7***<br>(0.7) | -6.5***<br>(0.7) | -2.3***<br>(0.6) | 3.6***<br>(0.6) | 4.6***<br>(0.5) | 24,0                          |
| After controlling for the above and: Sector of employment      | -19.7***<br>(1.0) | -12.5***<br>(0.7) | -7.7***<br>(0.7) | -3.7***<br>(0.6) | 2.1***<br>(0.6) | 3.6***<br>(0.5) | 23,3                          |
| After controlling for the above and: Union membership          | -19.4***<br>(1.0) | -12.5***<br>(0.7) | -7.9***<br>(0.7) | -3.7***<br>(0.6) | 1.7***<br>(0.6) | 3.3***<br>(0.5) | 22,7                          |
| After controlling for the above and: Home ownership            | -18.8***<br>(1.0) | -12.1***<br>(0.7) | -7.7***<br>(0.7) | -3.7***<br>(0.6) | 1.9***<br>(0.6) | 3.6***<br>(0.5) | 22,4                          |

**Note:** The table reports the marginal effect of belonging to top 10% educated voters on the probability to support Social Democratic / Socialist / Communist / Green / Other left-wing parties, before and after controlling for a set of covariates. The regressions are run on the restricted number of countries for which these covariates are available in most decades: Australia, Denmark, Finland, France, the Netherlands, Norway, New Zealand, Sweden, the United Kingdom, and the United States. All estimates include election (country-year) fixed effects.

**Table D10 - The reversal of educational divides by subgroup**

|                                | 1948-59           | 1960-69           | 1970-79           | 1980-89          | 1990-99          | 2000-09         | 2010-20         | 2010s - 1950s |
|--------------------------------|-------------------|-------------------|-------------------|------------------|------------------|-----------------|-----------------|---------------|
| <b>Gender</b>                  |                   |                   |                   |                  |                  |                 |                 |               |
| Men                            | -25.1***<br>(1.6) | -17.0***<br>(1.4) | -7.8***<br>(1.0)  | -3.8***<br>(0.9) | 3.8***<br>(0.7)  | 5.0***<br>(0.7) | 6.9***<br>(0.7) | 32,0          |
| Women                          | -24.9***<br>(1.9) | -16.7***<br>(1.1) | -13.2***<br>(0.8) | -7.4***<br>(0.7) | -3.3***<br>(0.7) | 0.8<br>(0.7)    | 2.0***<br>(0.7) | 26,9          |
| <b>Location</b>                |                   |                   |                   |                  |                  |                 |                 |               |
| Urban areas                    | -25.2***<br>(2.6) | -16.2***<br>(1.2) | -11.9***<br>(1.0) | -8.6***<br>(0.8) | -2.5***<br>(0.8) | 1.7***<br>(0.6) | 3.3***<br>(0.6) | 28,5          |
| Rural areas                    | -18.1***<br>(3.2) | -13.4***<br>(1.9) | -2.9*<br>(1.7)    | -3.7***<br>(1.4) | 3.5**<br>(1.7)   | 5.9***<br>(1.4) | 9.7***<br>(1.6) | 27,8          |
| <b>Religion</b>                |                   |                   |                   |                  |                  |                 |                 |               |
| No religion                    | -24.0***<br>(8.9) | -24.0***<br>(3.0) | -6.1***<br>(1.5)  | -0.6<br>(1.4)    | 4.6***<br>(1.2)  | 5.2***<br>(1.1) | 7.8***<br>(0.9) | 31,8          |
| Christian / Other              | -18.1***<br>(2.4) | -13.6***<br>(1.1) | -11.6***<br>(0.9) | -8.1***<br>(0.9) | -3.0***<br>(0.7) | -0.2<br>(0.7)   | 1.3**<br>(0.7)  | 19,4          |
| <b>Sector of employment</b>    |                   |                   |                   |                  |                  |                 |                 |               |
| Private sector                 | -25.2***<br>(3.5) | -20.7***<br>(3.0) | -14.9***<br>(1.6) | -8.1***<br>(1.2) | -4.2***<br>(0.8) | -0.9<br>(0.9)   | 1.5**<br>(0.7)  | 26,7          |
| Public sector                  | -12.3**<br>(6.0)  | -22.4***<br>(4.7) | -3.4*<br>(1.8)    | -3.1***<br>(1.2) | 1.1<br>(0.9)     | 5.4***<br>(0.9) | 5.8***<br>(0.8) | 18,1          |
| <b>Subjective social class</b> |                   |                   |                   |                  |                  |                 |                 |               |
| Working/Lower class            | -13.4***<br>(4.3) | -6.7***<br>(2.6)  | 0.8<br>(2.0)      | -3.7*<br>(2.0)   | -1.7<br>(2.2)    | 2.6<br>(2.4)    | 4.9*<br>(2.8)   | 18,3          |
| Middle/Upper class             | -11.0***<br>(2.4) | -6.0***<br>(1.2)  | 0.2<br>(1.2)      | 0.9<br>(1.0)     | 3.2***<br>(0.7)  | 5.3***<br>(0.8) | 7.3***<br>(1.0) | 18,3          |

**Source:** authors' computations using the World Political Cleavages and Inequality Database.

**Note:** the table reports the unconditional effect of belonging to top 10% educated voters on the probability to support Social Democratic / Socialist / Green / Other left-wing parties, decomposed by subgroup of voters. Within nearly all groups, most educated voters used to be significantly less likely to vote for these parties in the 1950s and 1960s. By the 2010s, they had become significantly more likely to do so. Figures correspond to regression results on all countries with available data for each decade. All estimates include election fixed effects. The original survey dataset is duplicated for each education category to approximate education deciles (see methodology). Robust standard errors clustered at the individual level. Coefficient standard errors in parenthesis. \* p<0.10, \*\* p<0.05, \*\*\* p<0.01.

**Table E1 - Determinants of support for Labor / Greens in Australia**

|                                        | (1)                  | (2)                  | (3)                  | (4)                  | (5)                  | (6)                  |
|----------------------------------------|----------------------|----------------------|----------------------|----------------------|----------------------|----------------------|
|                                        | 1960-69              | 1970-79              | 1980-89              | 1990-99              | 2000-09              | 2010-20              |
| Education: None/Primary                | (baseline)<br>(.)    | (baseline)<br>(.)    | (baseline)<br>(.)    | (baseline)<br>(.)    | (baseline)<br>(.)    | (baseline)<br>(.)    |
| Education: Secondary                   | -0.118***<br>(0.018) | -0.054**<br>(0.024)  | -0.045***<br>(0.015) | -0.040***<br>(0.012) | -0.019<br>(0.017)    | -0.010<br>(0.013)    |
| Education: University                  | -0.238***<br>(0.031) | -0.047<br>(0.040)    | -0.046*<br>(0.025)   | -0.070***<br>(0.021) | 0.086***<br>(0.023)  | 0.061***<br>(0.017)  |
| Education: Postgraduate                |                      |                      | -0.125<br>(0.082)    | -0.021<br>(0.025)    | 0.128***<br>(0.026)  | 0.077***<br>(0.017)  |
| Income group: Bottom 50%               | (baseline)<br>(.)    | (baseline)<br>(.)    | (baseline)<br>(.)    | (baseline)<br>(.)    | (baseline)<br>(.)    | (baseline)<br>(.)    |
| Income group: Middle 40%               | -0.165***<br>(0.018) | -0.071***<br>(0.015) | -0.012<br>(0.023)    | -0.038***<br>(0.014) | -0.104***<br>(0.016) | -0.034***<br>(0.013) |
| Income group: Top 10%                  | -0.333***<br>(0.029) | -0.275***<br>(0.024) | -0.110***<br>(0.037) | -0.149***<br>(0.021) | -0.179***<br>(0.024) | -0.126***<br>(0.020) |
| Age: 20-39                             | (baseline)<br>(.)    | (baseline)<br>(.)    | (baseline)<br>(.)    | (baseline)<br>(.)    | (baseline)<br>(.)    | (baseline)<br>(.)    |
| Age: 40-59                             | 0.020<br>(0.018)     | 0.009<br>(0.017)     | -0.033**<br>(0.016)  | -0.067***<br>(0.013) | 0.028<br>(0.017)     | -0.001<br>(0.015)    |
| Age: 60+                               | -0.067**<br>(0.028)  | -0.059***<br>(0.022) | -0.074***<br>(0.020) | -0.098***<br>(0.016) | -0.071***<br>(0.021) | -0.112***<br>(0.016) |
| Gender: Woman                          | (baseline)<br>(.)    | (baseline)<br>(.)    | (baseline)<br>(.)    | (baseline)<br>(.)    | (baseline)<br>(.)    | (baseline)<br>(.)    |
| Gender: Man                            | 0.068***<br>(0.019)  | 0.087***<br>(0.017)  | 0.048***<br>(0.014)  | 0.039***<br>(0.011)  | -0.012<br>(0.014)    | -0.073***<br>(0.011) |
| Religion: None                         |                      |                      | (baseline)<br>(.)    | (baseline)<br>(.)    | (baseline)<br>(.)    | (baseline)<br>(.)    |
| Religion: Catholic                     |                      |                      | 0.084**<br>(0.041)   | 0.064***<br>(0.022)  | -0.049**<br>(0.024)  | -0.090***<br>(0.018) |
| Religion: Other Christian              |                      |                      | -0.024<br>(0.037)    | -0.059***<br>(0.019) | -0.146***<br>(0.021) | -0.165***<br>(0.015) |
| Religion: Other                        |                      |                      | 0.099<br>(0.113)     | -0.029<br>(0.027)    | 0.040<br>(0.044)     | -0.043<br>(0.033)    |
| Religion: Muslim                       |                      |                      |                      | 0.274*<br>(0.152)    | 0.307***<br>(0.069)  | 0.193***<br>(0.058)  |
| Religious practice: Never              | (baseline)<br>(.)    | (baseline)<br>(.)    | (baseline)<br>(.)    | (baseline)<br>(.)    | (baseline)<br>(.)    | (baseline)<br>(.)    |
| Religious practice: Less than monthly  | -0.083***<br>(0.025) | -0.034<br>(0.034)    | -0.094***<br>(0.016) | -0.068***<br>(0.015) | -0.026<br>(0.018)    | -0.053***<br>(0.015) |
| Religious practice: Monthly or more    | -0.095***<br>(0.026) | -0.096***<br>(0.035) | -0.210***<br>(0.019) | -0.136***<br>(0.017) | -0.092***<br>(0.021) | -0.124***<br>(0.017) |
| Location: Urban                        | (baseline)<br>(.)    | (baseline)<br>(.)    | (baseline)<br>(.)    | (baseline)<br>(.)    | (baseline)<br>(.)    | (baseline)<br>(.)    |
| Location: Rural                        | -0.132***<br>(0.018) | -0.105***<br>(0.023) | -0.130***<br>(0.015) | -0.090***<br>(0.020) | -0.093***<br>(0.017) | -0.063***<br>(0.013) |
| Employment status: Employed            | (baseline)<br>(.)    | (baseline)<br>(.)    | (baseline)<br>(.)    | (baseline)<br>(.)    | (baseline)<br>(.)    | (baseline)<br>(.)    |
| Employment status: Unemployed/Inactive | -0.017<br>(0.039)    | 0.018<br>(0.019)     | 0.045***<br>(0.016)  | 0.036**<br>(0.014)   | 0.026<br>(0.017)     | 0.013<br>(0.013)     |

|                                      |            |            |            |            |            |            |
|--------------------------------------|------------|------------|------------|------------|------------|------------|
| Marital status: Single               | (baseline) | (baseline) | (baseline) | (baseline) | (baseline) | (baseline) |
|                                      | (.)        | (.)        | (.)        | (.)        | (.)        | (.)        |
| Marital status: Married/With partner | 0.018      | -0.014     | -0.023     | -0.039***  | -0.029*    | -0.037***  |
|                                      | (0.024)    | (0.018)    | (0.015)    | (0.013)    | (0.015)    | (0.012)    |
| Region: Australian Capital Territory |            |            | (baseline) | (baseline) | (baseline) | (baseline) |
|                                      |            |            | (.)        | (.)        | (.)        | (.)        |
| Region: New South Wales              |            |            | -0.044     | 0.009      | -0.142***  | -0.177***  |
|                                      |            |            | (0.094)    | (0.044)    | (0.044)    | (0.032)    |
| Region: Northern Territory           |            |            | -0.085     | 0.093      | -0.285***  | -0.130*    |
|                                      |            |            | (0.202)    | (0.082)    | (0.101)    | (0.069)    |
| Region: Queensland                   |            |            | -0.018     | -0.050     | -0.181***  | -0.234***  |
|                                      |            |            | (0.097)    | (0.045)    | (0.045)    | (0.033)    |
| Region: South Australia              |            |            | -0.091     | -0.074     | -0.188***  | -0.198***  |
|                                      |            |            | (0.098)    | (0.045)    | (0.049)    | (0.035)    |
| Region: Tasmania                     |            |            | -0.000     | 0.067      | -0.051     | -0.145***  |
|                                      |            |            | (0.113)    | (0.049)    | (0.058)    | (0.043)    |
| Region: Victoria                     |            |            | -0.081     | 0.015      | -0.122***  | -0.164***  |
|                                      |            |            | (0.095)    | (0.044)    | (0.045)    | (0.032)    |
| Region: Western Australia            |            |            | -0.062     | -0.032     | -0.137***  | -0.232***  |
|                                      |            |            | (0.100)    | (0.046)    | (0.047)    | (0.034)    |
| Constant                             | 0.728***   | 0.510***   | 0.705***   | 0.623***   | 0.804***   | 0.886***   |
|                                      | (0.038)    | (0.036)    | (0.100)    | (0.048)    | (0.048)    | (0.035)    |
| R-squared                            | 0.10       | 0.07       | 0.05       | 0.05       | 0.07       | 0.09       |
| Observations                         | 9787       | 10182      | 7064       | 12457      | 8151       | 14875      |
| Clusters                             | 2039       | 4066       | 2934       | 2997       | 2001       | 3932       |

**Note:** The table reports the effect of a set of individual characteristics on the probability to vote for Labor / Greens by decade in Australia. The original survey dataset is duplicated for each income bracket to approximate income deciles (see methodology). The number of clusters corresponds to the number of surveyed individuals in each decade. Robust standard errors clustered at the individual level.

**Table E2 - Determinants of support for SPÖ / KPÖ / Greens / NEOS in Austria**

|                                        | (1)                  | (2)                  | (3)                  | (4)                  | (5)                  |
|----------------------------------------|----------------------|----------------------|----------------------|----------------------|----------------------|
|                                        | 1970-79              | 1980-89              | 1990-99              | 2000-09              | 2010-20              |
| Education: None/Primary                | (baseline)<br>(.)    | (baseline)<br>(.)    | (baseline)<br>(.)    | (baseline)<br>(.)    | (baseline)<br>(.)    |
| Education: Secondary                   | -0.056**<br>(0.028)  | -0.033<br>(0.024)    | 0.001<br>(0.019)     | 0.001<br>(0.025)     | 0.001<br>(0.035)     |
| Education: University                  | -0.197***<br>(0.050) | -0.133***<br>(0.036) | -0.029<br>(0.029)    | -0.028<br>(0.037)    | 0.170***<br>(0.044)  |
| Income group: Bottom 50%               | (baseline)<br>(.)    | (baseline)<br>(.)    | (baseline)<br>(.)    | (baseline)<br>(.)    | (baseline)<br>(.)    |
| Income group: Middle 40%               | -0.039<br>(0.031)    | -0.085***<br>(0.023) | -0.022<br>(0.016)    | -0.021<br>(0.024)    | 0.005<br>(0.025)     |
| Income group: Top 10%                  | -0.201***<br>(0.045) | -0.123***<br>(0.038) | -0.024<br>(0.027)    | -0.101*<br>(0.053)   | -0.076*<br>(0.039)   |
| Age: 20-39                             | (baseline)<br>(.)    | (baseline)<br>(.)    | (baseline)<br>(.)    | (baseline)<br>(.)    | (baseline)<br>(.)    |
| Age: 40-59                             | 0.010<br>(0.029)     | -0.010<br>(0.027)    | -0.031*<br>(0.016)   | 0.067**<br>(0.027)   | -0.053*<br>(0.030)   |
| Age: 60+                               | 0.058<br>(0.036)     | -0.075**<br>(0.032)  | -0.072***<br>(0.021) | 0.009<br>(0.032)     | -0.125***<br>(0.039) |
| Gender: Woman                          | (baseline)<br>(.)    | (baseline)<br>(.)    | (baseline)<br>(.)    | (baseline)<br>(.)    | (baseline)<br>(.)    |
| Gender: Man                            | 0.029<br>(0.028)     | -0.007<br>(0.022)    | -0.043***<br>(0.014) | -0.057***<br>(0.021) | -0.081***<br>(0.023) |
| Religion: None                         | (baseline)<br>(.)    | (baseline)<br>(.)    | (baseline)<br>(.)    | (baseline)<br>(.)    | (baseline)<br>(.)    |
| Religion: Catholic                     | 0.002<br>(0.058)     | -0.196***<br>(0.032) | -0.086*<br>(0.050)   | -0.009<br>(0.042)    | -0.135***<br>(0.042) |
| Religion: Other Christian              | -0.119<br>(0.087)    | -0.205***<br>(0.055) | 0.013<br>(0.073)     | 0.245***<br>(0.064)  | -0.021<br>(0.074)    |
| Religion: Other                        | 0.131<br>(0.172)     | 0.032<br>(0.102)     | 0.124<br>(0.129)     | 0.180<br>(0.132)     | 0.150*<br>(0.087)    |
| Religion: Muslim                       |                      |                      | -0.643***<br>(0.055) | 0.275**<br>(0.128)   | 0.290***<br>(0.108)  |
| Religious practice: Never              | (baseline)<br>(.)    | (baseline)<br>(.)    |                      | (baseline)<br>(.)    | (baseline)<br>(.)    |
| Religious practice: Less than monthly  | -0.045<br>(0.037)    | -0.148***<br>(0.030) |                      | -0.212***<br>(0.038) | -0.056<br>(0.037)    |
| Religious practice: Monthly or more    | -0.469***<br>(0.036) | -0.388***<br>(0.028) |                      | -0.436***<br>(0.042) | -0.116***<br>(0.041) |
| Location: Urban                        | (baseline)<br>(.)    | (baseline)<br>(.)    | (baseline)<br>(.)    | (baseline)<br>(.)    | (baseline)<br>(.)    |
| Location: Rural                        | -0.055*<br>(0.029)   | -0.092***<br>(0.024) | -0.073***<br>(0.024) | -0.102**<br>(0.042)  | -0.071**<br>(0.028)  |
| Employment status: Employed            | (baseline)<br>(.)    | (baseline)<br>(.)    | (baseline)<br>(.)    | (baseline)<br>(.)    | (baseline)<br>(.)    |
| Employment status: Unemployed/Inactive | 0.068**<br>(0.030)   | 0.032<br>(0.026)     | 0.004<br>(0.016)     | 0.032<br>(0.024)     | 0.107***<br>(0.034)  |
| Marital status: Single                 | (baseline)<br>(.)    | (baseline)<br>(.)    | (baseline)<br>(.)    | (baseline)<br>(.)    | (baseline)<br>(.)    |



|                                      |                     |                     |                     |                      |                      |
|--------------------------------------|---------------------|---------------------|---------------------|----------------------|----------------------|
| Marital status: Married/With partner | -0.042<br>(0.028)   | 0.011<br>(0.022)    | -0.013<br>(0.015)   | -0.010<br>(0.023)    | -0.029<br>(0.027)    |
| Region: Burgenland                   |                     |                     |                     | (baseline)           | (baseline)           |
|                                      |                     |                     |                     | (.)                  | (.)                  |
| Region: Carinthia                    |                     |                     |                     | -0.110<br>(0.067)    | -0.255**<br>(0.105)  |
| Region: Lower Austria                |                     |                     |                     | -0.228***<br>(0.053) | -0.245***<br>(0.094) |
| Region: Salzburg                     |                     |                     |                     | -0.210***<br>(0.066) | -0.349***<br>(0.105) |
| Region: Styria                       |                     |                     |                     | -0.213***<br>(0.057) | -0.193*<br>(0.100)   |
| Region: Tyrol                        |                     |                     |                     | -0.218***<br>(0.059) | -0.334***<br>(0.099) |
| Region: Upper Austria                |                     |                     |                     | -0.193***<br>(0.054) | -0.211**<br>(0.099)  |
| Region: Vienna                       |                     |                     |                     | -0.153***<br>(0.055) | -0.168*<br>(0.098)   |
| Region: Vorarlberg                   |                     |                     |                     | -0.221***<br>(0.065) | -0.065<br>(0.117)    |
| Constant                             | 0.861***<br>(0.069) | 1.003***<br>(0.042) | 0.647***<br>(0.053) | 1.008***<br>(0.268)  | 0.881***<br>(0.105)  |
| R-squared                            | 0.23                | 0.20                | 0.02                | 0.12                 | 0.12                 |
| Observations                         | 2137                | 4158                | 11336               | 8514                 | 3559                 |
| Clusters                             | 1336                | 2688                | 6468                | 2731                 | 1162                 |

**Note:** The table reports the effect of a set of individual characteristics on the probability to vote for SPÖ / KPÖ / Greens / NEOS by decade in Austria. The original survey dataset is duplicated for each income bracket to approximate income deciles (see methodology). The number of clusters corresponds to the number of surveyed individuals in each decade. Robust standard errors clustered at the individual level.

**Table E3 - Determinants of support for Socialists / Greens in Belgium**

|                                        | (1)        | (2)        | (3)        | (4)        | (5)        |
|----------------------------------------|------------|------------|------------|------------|------------|
|                                        | 1970-79    | 1980-89    | 1990-99    | 2000-09    | 2010-20    |
| Education: None/Primary                | (baseline) | (baseline) | (baseline) | (baseline) | (baseline) |
|                                        | (.)        | (.)        | (.)        | (.)        | (.)        |
| Education: Secondary                   | -0.114***  | -0.090***  | -0.057***  | -0.049**   | -0.053***  |
|                                        | (0.015)    | (0.013)    | (0.014)    | (0.023)    | (0.020)    |
| Education: University                  | -0.196***  | -0.143***  | -0.051***  | -0.035     | -0.028     |
|                                        | (0.021)    | (0.017)    | (0.017)    | (0.026)    | (0.022)    |
| Income group: Bottom 50%               | (baseline) | (baseline) | (baseline) | (baseline) | (baseline) |
|                                        | (.)        | (.)        | (.)        | (.)        | (.)        |
| Income group: Middle 40%               | -0.032***  | -0.063***  | -0.004     | -0.022     | -0.012     |
|                                        | (0.012)    | (0.011)    | (0.013)    | (0.015)    | (0.014)    |
| Income group: Top 10%                  | -0.102***  | -0.144***  | -0.093***  | -0.076***  | -0.083***  |
|                                        | (0.018)    | (0.017)    | (0.017)    | (0.020)    | (0.020)    |
| Age: 20-39                             | (baseline) | (baseline) | (baseline) | (baseline) | (baseline) |
|                                        | (.)        | (.)        | (.)        | (.)        | (.)        |
| Age: 40-59                             | 0.046***   | -0.086***  | 0.006      | 0.024      | 0.012      |
|                                        | (0.016)    | (0.012)    | (0.012)    | (0.016)    | (0.016)    |
| Age: 60+                               | -0.001     | -0.197***  | -0.059***  | -0.043*    | -0.032     |
|                                        | (0.020)    | (0.015)    | (0.017)    | (0.023)    | (0.021)    |
| Gender: Woman                          | (baseline) | (baseline) | (baseline) | (baseline) | (baseline) |
|                                        | (.)        | (.)        | (.)        | (.)        | (.)        |
| Gender: Man                            | 0.017      | 0.025**    | -0.037***  | -0.035***  | -0.044***  |
|                                        | (0.011)    | (0.010)    | (0.011)    | (0.013)    | (0.012)    |
| Religion: None                         | (baseline) | (baseline) | (baseline) | (baseline) | (baseline) |
|                                        | (.)        | (.)        | (.)        | (.)        | (.)        |
| Religion: Catholic                     | -0.308***  | -0.212***  | -0.148***  | -0.126***  | -0.126***  |
|                                        | (0.028)    | (0.022)    | (0.021)    | (0.022)    | (0.019)    |
| Religion: Other Christian              | -0.087     | -0.143**   | 0.046      | -0.087     | 0.014      |
|                                        | (0.083)    | (0.064)    | (0.058)    | (0.069)    | (0.054)    |
| Religion: Other                        | -0.179*    | 0.088      | 0.033      | (baseline) | -0.005     |
|                                        | (0.092)    | (0.063)    | (0.043)    | (0.080)    | (0.073)    |
| Religion: Muslim                       |            |            |            | 0.364***   | 0.320***   |
|                                        |            |            |            | (0.064)    | (0.042)    |
| Religious practice: Never              | (baseline) | (baseline) | (baseline) | (baseline) | (baseline) |
|                                        | (.)        | (.)        | (.)        | (.)        | (.)        |
| Religious practice: Less than monthly  | -0.114***  | -0.054**   | -0.054***  | -0.039*    | -0.027     |
|                                        | (0.026)    | (0.026)    | (0.019)    | (0.023)    | (0.021)    |
| Religious practice: Monthly or more    | -0.342***  | -0.258***  | -0.198***  | -0.150***  | -0.061**   |
|                                        | (0.021)    | (0.025)    | (0.019)    | (0.027)    | (0.028)    |
| Location: Urban                        | (baseline) | (baseline) |            |            |            |
|                                        | (.)        | (.)        |            |            |            |
| Location: Rural                        | -0.073***  | -0.051***  |            |            |            |
|                                        | (0.016)    | (0.010)    |            |            |            |
| Employment status: Employed            | (baseline) | (baseline) | (baseline) | (baseline) | (baseline) |
|                                        | (.)        | (.)        | (.)        | (.)        | (.)        |
| Employment status: Unemployed/Inactive | -0.021     | 0.007      | 0.020      | 0.044**    | 0.042**    |
|                                        | (0.017)    | (0.012)    | (0.013)    | (0.019)    | (0.017)    |
| Marital status: Single                 | (baseline) | (baseline) | (baseline) | (baseline) | (baseline) |
|                                        | (.)        | (.)        | (.)        | (.)        | (.)        |

|                                      |                     |                      |                     |                      |                      |
|--------------------------------------|---------------------|----------------------|---------------------|----------------------|----------------------|
| Marital status: Married/With partner | 0.022<br>(0.016)    | -0.002<br>(0.011)    | 0.015<br>(0.012)    | -0.003<br>(0.015)    | -0.034**<br>(0.014)  |
| Race/ethnicity/language: Dutch       | (baseline)<br>(.)   | (baseline)<br>(.)    | (baseline)<br>(.)   | (baseline)<br>(.)    | (baseline)<br>(.)    |
| Race/ethnicity/language: French      | 0.079***<br>(0.023) | 0.055***<br>(0.020)  | 0.135***<br>(0.035) | -0.053*<br>(0.029)   | -0.010<br>(0.032)    |
| Race/ethnicity/language: Other       |                     |                      |                     | -0.023<br>(0.076)    | 0.105<br>(0.070)     |
| Region: Brussels                     | (baseline)<br>(.)   | (baseline)<br>(.)    | (baseline)<br>(.)   | (baseline)<br>(.)    | (baseline)<br>(.)    |
| Region: Flanders                     | 0.101***<br>(0.029) | -0.048***<br>(0.018) | 0.068**<br>(0.029)  | -0.214***<br>(0.038) | -0.187***<br>(0.030) |
| Region: Wallonia                     | 0.240***<br>(0.028) | 0.161***<br>(0.018)  | 0.124***<br>(0.023) | 0.054*<br>(0.033)    | 0.090***<br>(0.030)  |
| Constant                             | 0.622***<br>(0.044) | 0.813***<br>(0.032)  | 0.468***<br>(0.036) | 0.588***<br>(0.049)  | 0.557***<br>(0.042)  |
| R-squared                            | 0.15                | 0.13                 | 0.12                | 0.12                 | 0.14                 |
| Observations                         | 22962               | 25787                | 11737               | 10767                | 10034                |
| Clusters                             | 11054               | 12947                | 4411                | 1777                 | 1825                 |

**Note:** The table reports the effect of a set of individual characteristics on the probability to vote for Socialists / Greens by decade in Belgium. The original survey dataset is duplicated for each income bracket to approximate income deciles (see methodology). The number of clusters corresponds to the number of surveyed individuals in each decade. Robust standard errors clustered at the individual level.

**Table E4 - Determinants of support for Liberal / NDP / Green in Canada**

|                                        | (1)                  | (2)                  | (3)                  | (4)                  | (5)                  | (6)                  |
|----------------------------------------|----------------------|----------------------|----------------------|----------------------|----------------------|----------------------|
|                                        | 1960-69              | 1970-79              | 1980-89              | 1990-99              | 2000-09              | 2010-20              |
|                                        | (baseline)           | (baseline)           | (baseline)           | (baseline)           | (baseline)           | (baseline)           |
| Education: None/Primary                | (.)                  | (.)                  | (.)                  | (.)                  | (.)                  | (.)                  |
| Education: Secondary                   | 0.011<br>(0.021)     | -0.016<br>(0.025)    | -0.057***<br>(0.017) | -0.001<br>(0.022)    | 0.001<br>(0.021)     | 0.051**<br>(0.021)   |
| Education: University                  | 0.044<br>(0.036)     | 0.013<br>(0.035)     | -0.055**<br>(0.024)  | 0.046*<br>(0.027)    | 0.081***<br>(0.024)  | 0.117***<br>(0.024)  |
| Education: Postgraduate                |                      |                      |                      | 0.080**<br>(0.037)   | 0.103***<br>(0.029)  | 0.145***<br>(0.027)  |
| Income group: Bottom 50%               | (baseline)<br>(.)    | (baseline)<br>(.)    | (baseline)<br>(.)    | (baseline)<br>(.)    | (baseline)<br>(.)    | (baseline)<br>(.)    |
| Income group: Middle 40%               | 0.072***<br>(0.018)  | -0.022<br>(0.019)    | -0.034**<br>(0.016)  | 0.002<br>(0.019)     | -0.009<br>(0.015)    | -0.022*<br>(0.012)   |
| Income group: Top 10%                  | 0.097***<br>(0.032)  | -0.096***<br>(0.030) | -0.088***<br>(0.024) | -0.031<br>(0.030)    | -0.053**<br>(0.023)  | -0.082***<br>(0.020) |
| Age: 20-39                             | (baseline)<br>(.)    | (baseline)<br>(.)    | (baseline)<br>(.)    | (baseline)<br>(.)    | (baseline)<br>(.)    | (baseline)<br>(.)    |
| Age: 40-59                             | -0.003<br>(0.018)    | -0.039<br>(0.025)    | -0.003<br>(0.017)    | 0.041**<br>(0.018)   | 0.015<br>(0.015)     | -0.034**<br>(0.014)  |
| Age: 60+                               | -0.032<br>(0.025)    | -0.073**<br>(0.032)  | -0.021<br>(0.022)    | 0.073***<br>(0.026)  | 0.005<br>(0.020)     | -0.051***<br>(0.016) |
| Gender: Woman                          | (baseline)<br>(.)    | (baseline)<br>(.)    | (baseline)<br>(.)    | (baseline)<br>(.)    | (baseline)<br>(.)    | (baseline)<br>(.)    |
| Gender: Man                            | -0.011<br>(0.017)    | -0.036<br>(0.023)    | -0.069***<br>(0.015) | -0.060***<br>(0.016) | -0.062***<br>(0.013) | -0.071***<br>(0.011) |
| Religion: None                         | (baseline)<br>(.)    | (baseline)<br>(.)    | (baseline)<br>(.)    | (baseline)<br>(.)    | (baseline)<br>(.)    | (baseline)<br>(.)    |
| Religion: Catholic                     | 0.142**<br>(0.061)   | 0.139**<br>(0.058)   | 0.114***<br>(0.036)  | 0.046<br>(0.033)     | -0.065***<br>(0.025) | -0.067***<br>(0.017) |
| Religion: Other Christian              | -0.158***<br>(0.059) | -0.105*<br>(0.056)   | -0.057*<br>(0.034)   | -0.085***<br>(0.032) | -0.213***<br>(0.024) | -0.151***<br>(0.018) |
| Religion: Other                        | 0.042<br>(0.066)     | 0.011<br>(0.063)     | 0.087*<br>(0.046)    | 0.070<br>(0.048)     | -0.007<br>(0.035)    | -0.030<br>(0.027)    |
| Religion: Muslim                       |                      |                      |                      |                      | 0.312***<br>(0.040)  | 0.283***<br>(0.047)  |
| Religious practice: Never              | (baseline)<br>(.)    | (baseline)<br>(.)    | (baseline)<br>(.)    | (baseline)<br>(.)    | (baseline)<br>(.)    | (baseline)<br>(.)    |
| Religious practice: Less than monthly  | -0.032<br>(0.039)    | -0.061*<br>(0.032)   | -0.056**<br>(0.024)  | 0.025<br>(0.025)     | 0.015<br>(0.019)     | -0.016<br>(0.016)    |
| Religious practice: Monthly or more    | -0.112***<br>(0.039) | -0.088***<br>(0.034) | -0.067***<br>(0.025) | 0.033<br>(0.026)     | -0.036*<br>(0.021)   | -0.101***<br>(0.018) |
| Location: Urban                        | (baseline)<br>(.)    | (baseline)<br>(.)    | (baseline)<br>(.)    |                      | (baseline)<br>(.)    | (baseline)<br>(.)    |
| Location: Rural                        | -0.105***<br>(0.020) | -0.091***<br>(0.027) | -0.045**<br>(0.021)  |                      | -0.042<br>(0.028)    | -0.078***<br>(0.017) |
| Employment status: Employed            | (baseline)<br>(.)    | (baseline)<br>(.)    | (baseline)<br>(.)    | (baseline)<br>(.)    | (baseline)<br>(.)    | (baseline)<br>(.)    |
| Employment status: Unemployed/Inactive | 0.005<br>(0.021)     | -0.021<br>(0.023)    | 0.001<br>(0.018)     | -0.000<br>(0.020)    | 0.026<br>(0.016)     | 0.028**<br>(0.013)   |

|                                      |            |            |            |            |            |            |
|--------------------------------------|------------|------------|------------|------------|------------|------------|
| Marital status: Single               | (baseline) | (baseline) | (baseline) | (baseline) | (baseline) | (baseline) |
|                                      | (.)        | (.)        | (.)        | (.)        | (.)        | (.)        |
| Marital status: Married/With partner | 0.010      | 0.025      | -0.058***  | -0.050***  | -0.056***  | -0.047***  |
|                                      | (0.022)    | (0.024)    | (0.016)    | (0.018)    | (0.015)    | (0.012)    |
| Race/ethnicity/language: English     | (baseline) | (baseline) | (baseline) | (baseline) | (baseline) | (baseline) |
|                                      | (.)        | (.)        | (.)        | (.)        | (.)        | (.)        |
| Race/ethnicity/language: French      | -0.078**   | -0.118***  | -0.023     | -0.164***  | -0.241***  | -0.100***  |
|                                      | (0.033)    | (0.045)    | (0.031)    | (0.032)    | (0.031)    | (0.021)    |
| Race/ethnicity/language: Other       | 0.026      | 0.054      | 0.053*     | 0.188***   | 0.041      | -0.041*    |
|                                      | (0.042)    | (0.041)    | (0.030)    | (0.045)    | (0.027)    | (0.022)    |
| Region: Eastern                      | (baseline) | (baseline) | (baseline) | (baseline) | (baseline) | (baseline) |
|                                      | (.)        | (.)        | (.)        | (.)        | (.)        | (.)        |
| Region: Ontario                      | 0.054*     | 0.007      | 0.012      | -0.050*    | -0.095***  | -0.086***  |
|                                      | (0.029)    | (0.034)    | (0.023)    | (0.029)    | (0.025)    | (0.020)    |
| Region: Quebec                       | 0.017      | 0.098**    | -0.060*    | -0.268***  | -0.198***  | -0.095***  |
|                                      | (0.037)    | (0.044)    | (0.032)    | (0.035)    | (0.034)    | (0.024)    |
| Region: Western                      | -0.018     | -0.107***  | -0.076***  | -0.200***  | -0.235***  | -0.214***  |
|                                      | (0.031)    | (0.035)    | (0.024)    | (0.028)    | (0.025)    | (0.020)    |
| Constant                             | 0.666***   | 0.741***   | 0.764***   | 0.674***   | 0.860***   | 0.838***   |
|                                      | (0.059)    | (0.062)    | (0.040)    | (0.043)    | (0.039)    | (0.031)    |
| R-squared                            | 0.09       | 0.10       | 0.05       | 0.09       | 0.11       | 0.08       |
| Observations                         | 11112      | 7188       | 13319      | 7025       | 11959      | 20018      |
| Clusters                             | 2642       | 2381       | 3368       | 3646       | 5872       | 12260      |

**Note:** The table reports the effect of a set of individual characteristics on the probability to vote for Liberal / NDP / Green by decade in Canada. The original survey dataset is duplicated for each income bracket to approximate income deciles (see methodology). The number of clusters corresponds to the number of surveyed individuals in each decade. Robust standard errors clustered at the individual level.

**Table E5 - Determinants of support for Social Democratic Party / Socialist People's Party / Social Liberal Party / Red-Green Alliance in Denmark**

|                                        | (1)        | (2)        | (3)        | (4)        | (5)        | (6)        |
|----------------------------------------|------------|------------|------------|------------|------------|------------|
|                                        | 1960-69    | 1970-79    | 1980-89    | 1990-99    | 2000-09    | 2010-20    |
| Education: None/Primary                | (baseline) | (baseline) | (baseline) | (baseline) | (baseline) | (baseline) |
|                                        | (.)        | (.)        | (.)        | (.)        | (.)        | (.)        |
| Education: Secondary                   | -0.200***  | -0.163***  | 0.004      | -0.063***  | -0.002     | 0.057***   |
|                                        | (0.043)    | (0.018)    | (0.017)    | (0.016)    | (0.015)    | (0.022)    |
| Education: University                  | -0.249***  | -0.115***  | -0.018     | -0.037**   | 0.070***   | 0.095***   |
|                                        | (0.072)    | (0.024)    | (0.019)    | (0.018)    | (0.016)    | (0.025)    |
| Income group: Bottom 50%               | (baseline) | (baseline) | (baseline) | (baseline) | (baseline) | (baseline) |
|                                        | (.)        | (.)        | (.)        | (.)        | (.)        | (.)        |
| Income group: Middle 40%               | 0.084**    | 0.005      | -0.003     | -0.031**   | -0.083***  | -0.029     |
|                                        | (0.039)    | (0.016)    | (0.013)    | (0.013)    | (0.013)    | (0.020)    |
| Income group: Top 10%                  | -0.041     | -0.150***  | -0.223***  | -0.216***  | -0.201***  | -0.161***  |
|                                        | (0.058)    | (0.025)    | (0.022)    | (0.022)    | (0.021)    | (0.031)    |
| Age: 20-39                             | (baseline) | (baseline) | (baseline) | (baseline) | (baseline) | (baseline) |
|                                        | (.)        | (.)        | (.)        | (.)        | (.)        | (.)        |
| Age: 40-59                             | -0.007     | -0.061***  | -0.113***  | 0.064***   | 0.099***   | 0.046**    |
|                                        | (0.033)    | (0.017)    | (0.015)    | (0.015)    | (0.016)    | (0.019)    |
| Age: 60+                               | -0.034     | -0.086***  | -0.156***  | -0.093***  | -0.001     | -0.014     |
|                                        | (0.043)    | (0.021)    | (0.018)    | (0.020)    | (0.019)    | (0.025)    |
| Gender: Woman                          | (baseline) | (baseline) | (baseline) | (baseline) | (baseline) | (baseline) |
|                                        | (.)        | (.)        | (.)        | (.)        | (.)        | (.)        |
| Gender: Man                            | 0.005      | 0.006      | 0.010      | -0.034**   | -0.068***  | -0.087***  |
|                                        | (0.037)    | (0.013)    | (0.013)    | (0.014)    | (0.013)    | (0.016)    |
| Religious practice: Never              | (baseline) | (baseline) |            | (baseline) | (baseline) |            |
|                                        | (.)        | (.)        |            | (.)        | (.)        |            |
| Religious practice: Less than monthly  | -0.016     | -0.031     |            | -0.065***  | -0.073***  |            |
|                                        | (0.057)    | (0.048)    |            | (0.024)    | (0.018)    |            |
| Religious practice: Monthly or more    | -0.154**   | -0.143**   |            | -0.151***  | -0.175***  |            |
|                                        | (0.067)    | (0.060)    |            | (0.050)    | (0.035)    |            |
| Location: Urban                        |            | (baseline) | (baseline) | (baseline) | (baseline) | (baseline) |
|                                        |            | (.)        | (.)        | (.)        | (.)        | (.)        |
| Location: Rural                        |            | -0.213***  | -0.111***  | -0.069***  | -0.077***  | -0.098***  |
|                                        |            | (0.016)    | (0.015)    | (0.016)    | (0.014)    | (0.017)    |
| Employment status: Employed            | (baseline) | (baseline) | (baseline) | (baseline) | (baseline) | (baseline) |
|                                        | (.)        | (.)        | (.)        | (.)        | (.)        | (.)        |
| Employment status: Unemployed/Inactive | 0.057      | -0.049***  | -0.005     | -0.008     | -0.020     | 0.067***   |
|                                        | (0.040)    | (0.015)    | (0.018)    | (0.018)    | (0.015)    | (0.025)    |
| Marital status: Single                 | (baseline) | (baseline) | (baseline) | (baseline) | (baseline) | (baseline) |
|                                        | (.)        | (.)        | (.)        | (.)        | (.)        | (.)        |
| Marital status: Married/With partner   | -0.039     | -0.078***  | -0.002     | -0.023     | -0.043***  | 0.013      |
|                                        | (0.038)    | (0.016)    | (0.014)    | (0.014)    | (0.013)    | (0.017)    |
| Region: Capital                        | (baseline) | (baseline) | (baseline) | (baseline) | (baseline) | (baseline) |
|                                        | (.)        | (.)        | (.)        | (.)        | (.)        | (.)        |
| Region: Central Jutland                | -0.139***  | -0.076***  | -0.088***  | -0.050**   | -0.071***  | -0.047     |
|                                        | (0.041)    | (0.024)    | (0.016)    | (0.022)    | (0.018)    | (0.031)    |
| Region: Northern Jutland               | -0.130***  | -0.103***  | -0.080***  | -0.036     | -0.010     | 0.005      |
|                                        | (0.049)    | (0.031)    | (0.022)    | (0.030)    | (0.024)    | (0.045)    |
| Region: Southern Denmark               | -0.036     | -0.067***  | -0.034     | -0.106***  | -0.068***  | -0.059*    |
|                                        | (0.048)    | (0.024)    | (0.022)    | (0.022)    | (0.018)    | (0.032)    |

|                 |                     |                     |                     |                     |                      |                     |
|-----------------|---------------------|---------------------|---------------------|---------------------|----------------------|---------------------|
| Region: Zealand | -0.037<br>(0.044)   | -0.019<br>(0.026)   | -0.017<br>(0.021)   | -0.041*<br>(0.024)  | -0.061***<br>(0.021) | -0.038<br>(0.038)   |
| Constant        | 0.752***<br>(0.078) | 1.072***<br>(0.055) | 0.754***<br>(0.021) | 0.742***<br>(0.030) | 0.612***<br>(0.026)  | 0.556***<br>(0.038) |
| R-squared       | 0.10                | 0.09                | 0.07                | 0.05                | 0.05                 | 0.04                |
| Observations    | 11059               | 22837               | 24186               | 23048               | 20258                | 7069                |
| Clusters        | 1137                | 1923                | 3809                | 2028                | 3987                 | 2174                |

**Note:** The table reports the effect of a set of individual characteristics on the probability to vote for Social Democratic Party / Socialist People's Party / Social Liberal Party / Red-Green Alliance by decade in Denmark. The original survey dataset is duplicated for each income bracket to approximate income deciles (see methodology). The number of clusters corresponds to the number of surveyed individuals in each decade. Robust standard errors clustered at the individual level.

**Table E6 - Determinants of support for Social Democratic Party / Finnish People's Democratic League / Left Alliance / Green League in Finland**

|                                        | (1)        | (2)        | (3)        | (4)        | (5)        |
|----------------------------------------|------------|------------|------------|------------|------------|
|                                        | 1970-79    | 1980-89    | 1990-99    | 2000-09    | 2010-20    |
| Education: None/Primary                | (baseline) | (baseline) | (baseline) | (baseline) | (baseline) |
|                                        | (.)        | (.)        | (.)        | (.)        | (.)        |
| Education: Secondary                   | -0.187***  | -0.159***  | -0.113***  | -0.070***  | -0.041     |
|                                        | (0.018)    | (0.018)    | (0.016)    | (0.025)    | (0.038)    |
| Education: University                  | -0.337***  | -0.261***  | -0.188***  | -0.131***  | -0.086**   |
|                                        | (0.032)    | (0.026)    | (0.021)    | (0.029)    | (0.041)    |
| Income group: Bottom 50%               | (baseline) | (baseline) | (baseline) | (baseline) | (baseline) |
|                                        | (.)        | (.)        | (.)        | (.)        | (.)        |
| Income group: Middle 40%               | 0.022      | -0.067***  | -0.006     | -0.057**   | -0.021     |
|                                        | (0.021)    | (0.017)    | (0.014)    | (0.022)    | (0.023)    |
| Income group: Top 10%                  | -0.115***  | -0.193***  | -0.089***  | -0.087***  | -0.077***  |
|                                        | (0.028)    | (0.024)    | (0.021)    | (0.028)    | (0.027)    |
| Age: 20-39                             | (baseline) | (baseline) | (baseline) | (baseline) | (baseline) |
|                                        | (.)        | (.)        | (.)        | (.)        | (.)        |
| Age: 40-59                             | -0.050***  | -0.044***  | 0.052***   | 0.027      | -0.046*    |
|                                        | (0.019)    | (0.017)    | (0.014)    | (0.021)    | (0.027)    |
| Age: 60+                               | -0.081***  | -0.086***  | -0.079***  | -0.055**   | -0.092***  |
|                                        | (0.025)    | (0.022)    | (0.019)    | (0.026)    | (0.026)    |
| Gender: Woman                          | (baseline) | (baseline) | (baseline) | (baseline) | (baseline) |
|                                        | (.)        | (.)        | (.)        | (.)        | (.)        |
| Gender: Man                            | 0.071***   | 0.016      | -0.049***  | 0.003      | -0.042**   |
|                                        | (0.016)    | (0.015)    | (0.012)    | (0.018)    | (0.021)    |
| Location: Urban                        |            |            | (baseline) | (baseline) | (baseline) |
|                                        |            |            | (.)        | (.)        | (.)        |
| Location: Rural                        |            |            | -0.141***  | -0.121***  | -0.086***  |
|                                        |            |            | (0.017)    | (0.019)    | (0.023)    |
| Employment status: Employed            |            | (baseline) | (baseline) | (baseline) | (baseline) |
|                                        |            | (.)        | (.)        | (.)        | (.)        |
| Employment status: Unemployed/Inactive |            | -0.049***  | 0.020      | -0.004     | 0.043*     |
|                                        |            | (0.019)    | (0.015)    | (0.021)    | (0.024)    |
| Marital status: Single                 | (baseline) | (baseline) | (baseline) | (baseline) | (baseline) |
|                                        | (.)        | (.)        | (.)        | (.)        | (.)        |
| Marital status: Married/With partner   | 0.039      | 0.023      | -0.005     | -0.017     | -0.023     |
|                                        | (0.037)    | (0.019)    | (0.015)    | (0.022)    | (0.023)    |
| Region: Central Finland                | (baseline) | (baseline) | (baseline) | (baseline) | (baseline) |
|                                        | (.)        | (.)        | (.)        | (.)        | (.)        |
| Region: Northern Finland               | -0.036     | 0.001      | 0.055***   | -0.078**   | -0.038     |
|                                        | (0.027)    | (0.029)    | (0.020)    | (0.031)    | (0.042)    |
| Region: Southern Finland               | 0.094***   | 0.078***   | 0.145***   | 0.059***   | 0.062*     |
|                                        | (0.019)    | (0.018)    | (0.015)    | (0.019)    | (0.032)    |
| Constant                               | 0.501***   | 0.534***   | 0.517***   | 0.553***   | 0.502***   |
|                                        | (0.046)    | (0.026)    | (0.027)    | (0.035)    | (0.049)    |
| R-squared                              | 0.07       | 0.05       | 0.06       | 0.04       | 0.03       |
| Observations                           | 7403       | 9839       | 11737      | 7665       | 5175       |
| Clusters                               | 1358       | 1196       | 2480       | 1562       | 1442       |

**Note:** The table reports the effect of a set of individual characteristics on the probability to vote for left-wing parties by decade in Finland. The original survey dataset is duplicated for each income bracket to approximate income deciles (see methodology). The number of clusters corresponds to the number of surveyed individuals in each decade. Robust standard errors clustered at the individual level.



**Table E7 - Determinants of support for PS / PCF / Radicaux / Other left in France**

|                                        | (1)        | (2)        | (3)        | (4)        | (5)        | (6)        | (7)        |
|----------------------------------------|------------|------------|------------|------------|------------|------------|------------|
|                                        | 1950-59    | 1960-69    | 1970-79    | 1980-89    | 1990-99    | 2000-09    | 2010-20    |
| Education: None/Primary                | (baseline) |
|                                        | (.)        | (.)        | (.)        | (.)        | (.)        | (.)        | (.)        |
| Education: Secondary                   | -0.089***  | -0.054***  | -0.048***  | -0.017     | -0.009     | 0.002      | 0.046*     |
|                                        | (0.026)    | (0.018)    | (0.011)    | (0.014)    | (0.013)    | (0.015)    | (0.025)    |
| Education: University                  | -0.238***  | -0.078**   | -0.094***  | -0.031     | 0.081***   | 0.062***   | 0.177***   |
|                                        | (0.055)    | (0.037)    | (0.017)    | (0.020)    | (0.020)    | (0.021)    | (0.030)    |
| Income group: Bottom 50%               | (baseline) |
|                                        | (.)        | (.)        | (.)        | (.)        | (.)        | (.)        | (.)        |
| Income group: Middle 40%               | -0.030     | -0.022     | -0.014     | -0.071***  | -0.007     | -0.011     | -0.015     |
|                                        | (0.030)    | (0.016)    | (0.011)    | (0.012)    | (0.014)    | (0.011)    | (0.019)    |
| Income group: Top 10%                  | -0.015     | -0.133***  | -0.153***  | -0.160***  | -0.090***  | -0.065***  | -0.098***  |
|                                        | (0.056)    | (0.031)    | (0.017)    | (0.020)    | (0.020)    | (0.017)    | (0.030)    |
| Age: 20-39                             | (baseline) |
|                                        | (.)        | (.)        | (.)        | (.)        | (.)        | (.)        | (.)        |
| Age: 40-59                             | -0.033     | -0.029     | -0.083***  | -0.064***  | 0.022      | 0.036***   | 0.058***   |
|                                        | (0.025)    | (0.018)    | (0.011)    | (0.015)    | (0.014)    | (0.014)    | (0.021)    |
| Age: 60+                               | -0.092***  | -0.069***  | -0.157***  | -0.068***  | -0.012     | 0.002      | 0.020      |
|                                        | (0.033)    | (0.023)    | (0.014)    | (0.019)    | (0.017)    | (0.018)    | (0.028)    |
| Gender: Woman                          | (baseline) |
|                                        | (.)        | (.)        | (.)        | (.)        | (.)        | (.)        | (.)        |
| Gender: Man                            | 0.168***   | 0.070***   | 0.014      | -0.040***  | -0.019*    | -0.013     | -0.016     |
|                                        | (0.026)    | (0.017)    | (0.010)    | (0.013)    | (0.011)    | (0.011)    | (0.017)    |
| Religion: None                         |            | (baseline) | (baseline) | (baseline) | (baseline) | (baseline) | (baseline) |
|                                        |            | (.)        | (.)        | (.)        | (.)        | (.)        | (.)        |
| Religion: Catholic                     |            | -0.227***  | -0.299***  | -0.305***  | -0.243***  | -0.207***  | -0.189***  |
|                                        |            | (0.041)    | (0.012)    | (0.019)    | (0.015)    | (0.014)    | (0.020)    |
| Religion: Other Christian              |            | -0.033     | -0.323***  | -0.357***  | -0.320***  | -0.308***  | -0.214***  |
|                                        |            | (0.073)    | (0.033)    | (0.046)    | (0.037)    | (0.037)    | (0.062)    |
| Religion: Other                        |            |            | -0.273***  | -0.143***  | -0.121**   | -0.096**   | -0.026     |
|                                        |            |            | (0.044)    | (0.055)    | (0.051)    | (0.046)    | (0.059)    |
| Religion: Muslim                       |            |            |            | -0.135     | 0.261***   | 0.207***   | 0.281***   |
|                                        |            |            |            | (0.111)    | (0.052)    | (0.043)    | (0.037)    |
| Location: Urban                        | (baseline) | (baseline) | (baseline) |            | (baseline) | (baseline) | (baseline) |
|                                        | (.)        | (.)        | (.)        |            | (.)        | (.)        | (.)        |
| Location: Rural                        | 0.012      | -0.024     | -0.052***  |            | -0.024     | -0.052***  | -0.095***  |
|                                        | (0.025)    | (0.017)    | (0.011)    |            | (0.025)    | (0.012)    | (0.019)    |
| Employment status: Employed            | (baseline) |
|                                        | (.)        | (.)        | (.)        | (.)        | (.)        | (.)        | (.)        |
| Employment status: Unemployed/Inactive | 0.035      | -0.009     | -0.003     | -0.008     | -0.013     | 0.003      | 0.034      |
|                                        | (0.029)    | (0.020)    | (0.011)    | (0.015)    | (0.014)    | (0.015)    | (0.022)    |
| Marital status: Single                 | (baseline) |
|                                        | (.)        | (.)        | (.)        | (.)        | (.)        | (.)        | (.)        |
| Marital status: Married/With partner   | 0.102***   | -0.001     | 0.033***   | 0.002      | 0.011      | -0.028**   | -0.038*    |
|                                        | (0.034)    | (0.022)    | (0.012)    | (0.015)    | (0.013)    | (0.012)    | (0.019)    |
| Region: Auvergne-Rhone-Alpes           | (baseline) |
|                                        | (.)        | (.)        | (.)        | (.)        | (.)        | (.)        | (.)        |
| Region: Bourgogne-Franche-Comte        | 0.054      | -0.006     | -0.073***  | 0.031      | 0.051*     | -0.003     | -0.028     |
|                                        | (0.066)    | (0.037)    | (0.027)    | (0.031)    | (0.028)    | (0.049)    | (0.078)    |
| Region: Bretagne                       | -0.058     | -0.062*    | -0.058**   | 0.129***   | 0.046      | 0.041      | 0.009      |
|                                        | (0.058)    | (0.037)    | (0.026)    | (0.033)    | (0.029)    | (0.048)    | (0.062)    |
| Region: Centre-Val de Loire            | -0.057     | -0.007     | -0.103***  | -0.032     | 0.017      | -0.072     | -0.022     |
|                                        | (0.060)    | (0.047)    | (0.024)    | (0.034)    | (0.032)    | (0.052)    | (0.076)    |
| Region: Grand Est                      | -0.162***  | -0.133***  | -0.035*    | -0.010     | 0.023      | 0.008      | -0.154***  |
|                                        | (0.052)    | (0.036)    | (0.020)    | (0.028)    | (0.022)    | (0.039)    | (0.058)    |
| Region: Hauts-de-France                | 0.035      | 0.014      | -0.043**   | 0.060**    | 0.036*     | -0.042     | -0.135**   |
|                                        | (0.045)    | (0.034)    | (0.020)    | (0.027)    | (0.022)    | (0.038)    | (0.056)    |

|                            |                      |                      |                     |                     |                      |                     |                      |
|----------------------------|----------------------|----------------------|---------------------|---------------------|----------------------|---------------------|----------------------|
| Region: Ile-de-France      | 0.051<br>(0.068)     | 0.003<br>(0.038)     | 0.021<br>(0.018)    | -0.022<br>(0.025)   | -0.016<br>(0.021)    | -0.020<br>(0.037)   | -0.063<br>(0.052)    |
| Region: Normandie          | -0.138**<br>(0.055)  | -0.147***<br>(0.038) | -0.050**<br>(0.021) | -0.041<br>(0.032)   | 0.044*<br>(0.025)    | -0.033<br>(0.047)   | 0.007<br>(0.074)     |
| Region: Nouvelle-Aquitaine | 0.046<br>(0.047)     | 0.058<br>(0.036)     | 0.025<br>(0.020)    | 0.066**<br>(0.028)  | 0.018<br>(0.023)     | -0.039<br>(0.040)   | -0.037<br>(0.059)    |
| Region: Occitanie          | 0.155***<br>(0.052)  | 0.149***<br>(0.039)  | 0.112***<br>(0.021) | 0.034<br>(0.027)    | 0.015<br>(0.023)     | -0.011<br>(0.040)   | 0.036<br>(0.056)     |
| Region: PACA               | 0.148**<br>(0.064)   | 0.064<br>(0.045)     | 0.014<br>(0.023)    | -0.060**<br>(0.029) | -0.094***<br>(0.025) | -0.081*<br>(0.042)  | -0.170***<br>(0.063) |
| Region: Paris              | 0.071<br>(0.051)     | 0.060<br>(0.040)     | -0.007<br>(0.024)   | -0.028<br>(0.037)   | -0.084**<br>(0.034)  | 0.100<br>(0.062)    | -0.066<br>(0.093)    |
| Region: Pays de la Loire   | -0.152***<br>(0.056) | -0.181***<br>(0.039) | -0.045*<br>(0.024)  | 0.001<br>(0.029)    | 0.003<br>(0.025)     | 0.076*<br>(0.044)   | -0.039<br>(0.064)    |
| Constant                   | 0.550***<br>(0.072)  | 0.732***<br>(0.053)  | 0.948***<br>(0.022) | 0.874***<br>(0.031) | 0.793***<br>(0.037)  | 0.645***<br>(0.036) | 0.646***<br>(0.051)  |
| R-squared                  | 0.09                 | 0.12                 | 0.18                | 0.11                | 0.09                 | 0.11                | 0.12                 |
| Observations               | 3650                 | 9522                 | 20668               | 15563               | 17578                | 18054               | 7122                 |
| Clusters                   | 1339                 | 1936                 | 4474                | 3819                | 3964                 | 3953                | 2457                 |

**Note:** The table reports the effect of a set of individual characteristics on the probability to vote for left-wing parties (PS, PCF, Radicaux, etc.) by decade in France. The original survey dataset is duplicated for each income bracket to approximate income deciles (see methodology). The number of clusters corresponds to the number of surveyed individuals in each decade. Robust standard errors clustered at the individual level.

**Table E8 - Determinants of support for SPD / Die Grünen / Die Linke in Germany**

|                                       | (1)        | (2)        | (3)        | (4)        | (5)        | (6)        | (7)        |
|---------------------------------------|------------|------------|------------|------------|------------|------------|------------|
|                                       | 1950-59    | 1960-69    | 1970-79    | 1980-89    | 1990-99    | 2000-09    | 2010-20    |
| Education: None/Primary               | (baseline) |
|                                       | (.)        | (.)        | (.)        | (.)        | (.)        | (.)        | (.)        |
| Education: Secondary                  | -0.155***  | -0.139***  | -0.166***  | -0.066**   | -0.043*    | -0.090***  | -0.008     |
|                                       | (0.021)    | (0.025)    | (0.028)    | (0.026)    | (0.023)    | (0.021)    | (0.028)    |
| Education: University                 | -0.172***  | -0.189***  | -0.263***  | -0.090**   | 0.032      | -0.005     | 0.072**    |
|                                       | (0.031)    | (0.038)    | (0.042)    | (0.039)    | (0.028)    | (0.024)    | (0.033)    |
| Education: Postgraduate               |            |            |            |            |            | -0.056     | 0.115***   |
|                                       |            |            |            |            |            | (0.042)    | (0.034)    |
| Income group: Bottom 50%              | (baseline) | (baseline) | (baseline) |            | (baseline) | (baseline) | (baseline) |
|                                       | (.)        | (.)        | (.)        |            | (.)        | (.)        | (.)        |
| Income group: Middle 40%              | -0.009     | -0.013     | -0.026     |            | -0.061**   | -0.032*    | -0.045*    |
|                                       | (0.014)    | (0.019)    | (0.023)    |            | (0.025)    | (0.018)    | (0.023)    |
| Income group: Top 10%                 | -0.119***  | -0.187***  | -0.136***  |            | -0.143***  | -0.118***  | -0.167***  |
|                                       | (0.022)    | (0.027)    | (0.042)    |            | (0.044)    | (0.030)    | (0.037)    |
| Age: 20-39                            | (baseline) |
|                                       | (.)        | (.)        | (.)        | (.)        | (.)        | (.)        | (.)        |
| Age: 40-59                            | -0.013     | -0.030     | -0.059**   | -0.066***  | -0.044*    | 0.031      | 0.041      |
|                                       | (0.018)    | (0.019)    | (0.025)    | (0.026)    | (0.023)    | (0.022)    | (0.029)    |
| Age: 60+                              | -0.071***  | -0.096***  | -0.088***  | -0.097***  | -0.132***  | -0.064***  | 0.015      |
|                                       | (0.022)    | (0.025)    | (0.029)    | (0.028)    | (0.027)    | (0.023)    | (0.030)    |
| Gender: Woman                         | (baseline) |
|                                       | (.)        | (.)        | (.)        | (.)        | (.)        | (.)        | (.)        |
| Gender: Man                           | 0.122***   | 0.077***   | 0.003      | -0.041*    | -0.053***  | -0.013     | -0.029     |
|                                       | (0.016)    | (0.018)    | (0.022)    | (0.021)    | (0.020)    | (0.017)    | (0.021)    |
| Religion: None                        | (baseline) |
|                                       | (.)        | (.)        | (.)        | (.)        | (.)        | (.)        | (.)        |
| Religion: Catholic                    | -0.298***  | -0.116     | -0.191***  | -0.170***  | -0.131***  | -0.207***  | -0.091***  |
|                                       | (0.044)    | (0.139)    | (0.053)    | (0.052)    | (0.035)    | (0.030)    | (0.034)    |
| Religion: Other Christian             | -0.196***  | 0.063      | -0.016     | -0.077     | -0.053*    | -0.047*    | -0.022     |
|                                       | (0.043)    | (0.139)    | (0.052)    | (0.050)    | (0.031)    | (0.026)    | (0.030)    |
| Religion: Other                       | -0.157*    | -0.443***  | -0.166     | 0.024      | 0.103      | 0.106*     | 0.129      |
|                                       | (0.083)    | (0.139)    | (0.107)    | (0.128)    | (0.100)    | (0.062)    | (0.080)    |
| Religious practice: Never             | (baseline) |
|                                       | (.)        | (.)        | (.)        | (.)        | (.)        | (.)        | (.)        |
| Religious practice: Less than monthly | -0.138***  | -0.155***  | -0.201***  | -0.092***  | -0.130***  | -0.087***  | -0.052*    |
|                                       | (0.022)    | (0.036)    | (0.038)    | (0.026)    | (0.026)    | (0.022)    | (0.029)    |
| Religious practice: Monthly or more   | -0.301***  | -0.270***  | -0.381***  | -0.288***  | -0.301***  | -0.201***  | -0.190***  |
|                                       | (0.021)    | (0.037)    | (0.042)    | (0.032)    | (0.033)    | (0.034)    | (0.037)    |
| Region: East                          |            |            |            |            | (baseline) | (baseline) | (baseline) |
|                                       |            |            |            |            | (.)        | (.)        | (.)        |
| Region: West                          |            |            |            |            | 0.093***   | -0.008     | 0.045*     |
|                                       |            |            |            |            | (0.025)    | (0.022)    | (0.024)    |
| Constant                              | 0.738***   | 0.605***   | 0.851***   | 0.788***   | 0.777***   | 0.728***   | 0.514***   |
|                                       | (0.045)    | (0.143)    | (0.054)    | (0.051)    | (0.032)    | (0.029)    | (0.039)    |
| R-squared                             | 0.13       | 0.11       | 0.16       | 0.08       | 0.10       | 0.08       | 0.04       |
| Observations                          | 15983      | 5837       | 4993       | 3034       | 5849       | 9169       | 6293       |
| Clusters                              | 4705       | 2958       | 2155       | 3034       | 3937       | 4726       | 3131       |

**Note:** The table reports the effect of a set of individual characteristics on the probability to vote for SPD / Die Grünen / Die Linke by decade in Germany. The original survey dataset is duplicated for each income bracket to approximate income deciles (see methodology). The number of clusters corresponds to the number of surveyed individuals in each decade. Robust standard errors clustered at the individual level.

**Table E9 - Determinants of support for Social Democratic Alliance / Left-Green movement in Iceland**

|                                        | (1)                 | (2)                  | (3)                  | (4)                  | (5)                  |
|----------------------------------------|---------------------|----------------------|----------------------|----------------------|----------------------|
|                                        | 1970-79             | 1980-89              | 1990-99              | 2000-09              | 2010-20              |
| Education: None/Primary                | (baseline)<br>(.)   | (baseline)<br>(.)    | (baseline)<br>(.)    | (baseline)<br>(.)    | (baseline)<br>(.)    |
| Education: Secondary                   | 0.084*<br>(0.048)   | 0.028<br>(0.024)     | 0.022<br>(0.018)     | -0.022<br>(0.020)    | 0.029<br>(0.019)     |
| Education: University                  | 0.125*<br>(0.073)   | 0.014<br>(0.043)     | 0.111***<br>(0.027)  | 0.075***<br>(0.024)  | 0.084***<br>(0.020)  |
| Income group: Bottom 50%               |                     | (baseline)<br>(.)    | (baseline)<br>(.)    | (baseline)<br>(.)    | (baseline)<br>(.)    |
| Income group: Middle 40%               |                     | -0.045*<br>(0.027)   | -0.040**<br>(0.017)  | -0.091***<br>(0.018) | -0.042**<br>(0.016)  |
| Income group: Top 10%                  |                     | -0.087**<br>(0.039)  | -0.035<br>(0.025)    | -0.122***<br>(0.025) | -0.097***<br>(0.022) |
| Age: 20-39                             | (baseline)<br>(.)   | (baseline)<br>(.)    | (baseline)<br>(.)    | (baseline)<br>(.)    | (baseline)<br>(.)    |
| Age: 40-59                             | -0.107**<br>(0.043) | -0.075***<br>(0.024) | -0.021<br>(0.018)    | 0.013<br>(0.019)     | 0.010<br>(0.017)     |
| Age: 60+                               | -0.105**<br>(0.053) | -0.142***<br>(0.029) | 0.011<br>(0.023)     | -0.002<br>(0.024)    | 0.074***<br>(0.019)  |
| Gender: Woman                          | (baseline)<br>(.)   | (baseline)<br>(.)    | (baseline)<br>(.)    | (baseline)<br>(.)    | (baseline)<br>(.)    |
| Gender: Man                            | -0.041<br>(0.044)   | -0.067***<br>(0.022) | -0.110***<br>(0.016) | -0.112***<br>(0.017) | -0.083***<br>(0.016) |
| Location: Urban                        | (baseline)<br>(.)   | (baseline)<br>(.)    | (baseline)<br>(.)    | (baseline)<br>(.)    | (baseline)<br>(.)    |
| Location: Rural                        | 0.007<br>(0.065)    | -0.014<br>(0.036)    | 0.003<br>(0.029)     | -0.140***<br>(0.029) | -0.059**<br>(0.027)  |
| Employment status: Employed            | (baseline)<br>(.)   | (baseline)<br>(.)    | (baseline)<br>(.)    | (baseline)<br>(.)    | (baseline)<br>(.)    |
| Employment status: Unemployed/Inactive | -0.020<br>(0.047)   | -0.109***<br>(0.026) | -0.090***<br>(0.020) | -0.082***<br>(0.020) | -0.125***<br>(0.019) |
| Marital status: Single                 | (baseline)<br>(.)   | (baseline)<br>(.)    | (baseline)<br>(.)    | (baseline)<br>(.)    | (baseline)<br>(.)    |
| Marital status: Married/With partner   | 0.085*<br>(0.048)   | -0.024<br>(0.026)    | -0.041**<br>(0.019)  | 0.008<br>(0.021)     | -0.053***<br>(0.018) |
| Region: Capital area                   | (baseline)<br>(.)   | (baseline)<br>(.)    | (baseline)<br>(.)    | (baseline)<br>(.)    | (baseline)<br>(.)    |
| Region: East                           | -0.148<br>(0.105)   | -0.081<br>(0.056)    | -0.018<br>(0.045)    | -0.043<br>(0.046)    | 0.012<br>(0.047)     |
| Region: Northeast                      | -0.030<br>(0.082)   | -0.053<br>(0.046)    | -0.007<br>(0.034)    | 0.108***<br>(0.036)  | 0.079**<br>(0.034)   |
| Region: Northwest                      | -0.236**<br>(0.108) | -0.232***<br>(0.057) | -0.142***<br>(0.045) | -0.021<br>(0.050)    | -0.017<br>(0.049)    |
| Region: South                          | -0.207**<br>(0.085) | -0.171***<br>(0.044) | -0.059<br>(0.036)    | 0.026<br>(0.039)     | 0.005<br>(0.033)     |
| Region: Sudurnes                       | -0.007<br>(0.098)   | -0.145***<br>(0.053) | 0.036<br>(0.042)     | 0.043<br>(0.046)     | -0.027<br>(0.038)    |
| Region: West                           | (baseline)<br>(.)   | (baseline)<br>(.)    | (baseline)<br>(.)    | (baseline)<br>(.)    | (baseline)<br>(.)    |

|              |                     |                     |                     |                     |                     |
|--------------|---------------------|---------------------|---------------------|---------------------|---------------------|
| Constant     | 0.505***<br>(0.066) | 0.688***<br>(0.038) | 0.568***<br>(0.026) | 0.683***<br>(0.028) | 0.474***<br>(0.026) |
| R-squared    | 0.06                | 0.06                | 0.05                | 0.06                | 0.05                |
| Observations | 716                 | 4498                | 9618                | 9245                | 9516                |
| Clusters     | 716                 | 1598                | 1688                | 1550                | 1981                |

**Note:** The table reports the effect of a set of individual characteristics on the probability to vote for Social Democratic Alliance / Left-Green movement by decade in Iceland. The original survey dataset is duplicated for each income bracket to approximate income deciles (see methodology). The number of clusters corresponds to the number of surveyed individuals in each decade. Robust standard errors clustered at the individual level.

**Table E10 - Determinants of support for Fianna Fáil / Sinn Féin / Other left-wing parties in Ireland**

|                                        | (1)        | (2)        | (3)        | (4)        | (5)        |
|----------------------------------------|------------|------------|------------|------------|------------|
|                                        | 1970-79    | 1980-89    | 1990-99    | 2000-09    | 2010-20    |
| Education: None/Primary                | (baseline) | (baseline) | (baseline) | (baseline) | (baseline) |
|                                        | (.)        | (.)        | (.)        | (.)        | (.)        |
| Education: Secondary                   | -0.099***  | -0.073***  | -0.050***  | -0.064***  | -0.095***  |
|                                        | (0.015)    | (0.010)    | (0.016)    | (0.018)    | (0.026)    |
| Education: University                  | -0.188***  | -0.205***  | -0.120***  | -0.128***  | -0.151***  |
|                                        | (0.035)    | (0.020)    | (0.026)    | (0.022)    | (0.028)    |
| Income group: Bottom 50%               | (baseline) | (baseline) | (baseline) | (baseline) | (baseline) |
|                                        | (.)        | (.)        | (.)        | (.)        | (.)        |
| Income group: Middle 40%               | -0.004     | -0.061***  | -0.044***  | -0.029     | -0.048***  |
|                                        | (0.015)    | (0.010)    | (0.016)    | (0.017)    | (0.017)    |
| Income group: Top 10%                  | -0.069***  | -0.118***  | -0.125***  | -0.041     | -0.095***  |
|                                        | (0.025)    | (0.015)    | (0.026)    | (0.032)    | (0.026)    |
| Age: 20-39                             | (baseline) | (baseline) | (baseline) | (baseline) | (baseline) |
|                                        | (.)        | (.)        | (.)        | (.)        | (.)        |
| Age: 40-59                             | -0.085***  | -0.056***  | -0.042***  | -0.043***  | -0.034*    |
|                                        | (0.016)    | (0.010)    | (0.013)    | (0.017)    | (0.018)    |
| Age: 60+                               | -0.092***  | -0.071***  | -0.074***  | -0.090***  | -0.056***  |
|                                        | (0.019)    | (0.012)    | (0.016)    | (0.020)    | (0.021)    |
| Gender: Woman                          | (baseline) | (baseline) | (baseline) | (baseline) | (baseline) |
|                                        | (.)        | (.)        | (.)        | (.)        | (.)        |
| Gender: Man                            | 0.027*     | 0.056***   | 0.027**    | 0.036***   | 0.004      |
|                                        | (0.015)    | (0.009)    | (0.011)    | (0.014)    | (0.014)    |
| Religion: None                         | (baseline) | (baseline) | (baseline) | (baseline) | (baseline) |
|                                        | (.)        | (.)        | (.)        | (.)        | (.)        |
| Religion: Catholic                     | -0.102     | 0.063      | 0.061      | 0.010      | -0.046*    |
|                                        | (0.099)    | (0.048)    | (0.046)    | (0.042)    | (0.027)    |
| Religion: Other Christian              | -0.416***  | -0.269***  | -0.301***  | -0.185***  | -0.203***  |
|                                        | (0.105)    | (0.056)    | (0.057)    | (0.055)    | (0.045)    |
| Religion: Other                        | -0.346***  | -0.147*    | 0.066      | 0.217**    | 0.008      |
|                                        | (0.133)    | (0.083)    | (0.086)    | (0.101)    | (0.057)    |
| Religion: Muslim                       |            |            |            | 0.131      | 0.048      |
|                                        |            |            |            | (0.124)    | (0.168)    |
| Religious practice: Never              | (baseline) | (baseline) | (baseline) | (baseline) | (baseline) |
|                                        | (.)        | (.)        | (.)        | (.)        | (.)        |
| Religious practice: Less than monthly  | -0.011     | -0.064     | -0.065*    | -0.047     | -0.045     |
|                                        | (0.089)    | (0.043)    | (0.037)    | (0.040)    | (0.028)    |
| Religious practice: Monthly or more    | -0.013     | -0.046     | -0.112***  | -0.061     | -0.073***  |
|                                        | (0.085)    | (0.039)    | (0.034)    | (0.040)    | (0.028)    |
| Location: Urban                        | (baseline) | (baseline) | (baseline) |            |            |
|                                        | (.)        | (.)        | (.)        |            |            |
| Location: Rural                        | -0.103***  | -0.058***  | -0.043***  |            |            |
|                                        | (0.014)    | (0.008)    | (0.013)    |            |            |
| Employment status: Employed            | (baseline) | (baseline) | (baseline) | (baseline) | (baseline) |
|                                        | (.)        | (.)        | (.)        | (.)        | (.)        |
| Employment status: Unemployed/Inactive | 0.010      | 0.048***   | 0.061***   | 0.025      | 0.036**    |
|                                        | (0.017)    | (0.010)    | (0.013)    | (0.015)    | (0.016)    |
| Marital status: Single                 | (baseline) | (baseline) | (baseline) | (baseline) | (baseline) |
|                                        | (.)        | (.)        | (.)        | (.)        | (.)        |

|                                      |                     |                     |                     |                      |                      |
|--------------------------------------|---------------------|---------------------|---------------------|----------------------|----------------------|
| Marital status: Married/With partner | -0.006<br>(0.014)   | 0.008<br>(0.009)    | -0.007<br>(0.012)   | -0.013<br>(0.014)    | -0.033**<br>(0.016)  |
| Region: Border                       |                     |                     |                     | (baseline)<br>(.)    | (baseline)<br>(.)    |
| Region: Dublin                       |                     |                     |                     | 0.062**<br>(0.029)   | -0.038<br>(0.026)    |
| Region: Mid-East                     |                     |                     |                     | -0.023<br>(0.036)    | -0.046<br>(0.030)    |
| Region: Mid-West                     |                     |                     |                     | -0.049<br>(0.035)    | -0.069**<br>(0.032)  |
| Region: Midlands                     |                     |                     |                     | -0.020<br>(0.040)    | -0.081**<br>(0.036)  |
| Region: South-East                   |                     |                     |                     | -0.001<br>(0.035)    | -0.049<br>(0.030)    |
| Region: South-West                   |                     |                     |                     | 0.002<br>(0.031)     | -0.026<br>(0.028)    |
| Region: West                         |                     |                     |                     | -0.129***<br>(0.034) | -0.151***<br>(0.030) |
| Constant                             | 0.959***<br>(0.058) | 0.730***<br>(0.043) | 0.783***<br>(0.043) | 0.776***<br>(0.039)  | 0.849***<br>(0.040)  |
| R-squared                            | 0.04                | 0.03                | 0.03                | 0.03                 | 0.06                 |
| Observations                         | 17708               | 31395               | 18108               | 12435                | 16099                |
| Clusters                             | 8254                | 18359               | 12790               | 2384                 | 2678                 |

**Note:** The table reports the effect of a set of individual characteristics on the probability to vote for Fianna Fáil / Sinn Féin / Labour / Other left by decade in Ireland. The original survey dataset is duplicated for each income bracket to approximate income deciles (see methodology). The number of clusters corresponds to the number of surveyed individuals in each decade. Robust standard errors clustered at the individual level.

**Table E11 - Determinants of support for Social Democrats / Socialists / Communists / Greens in Italy**

|                                        | (1)        | (2)        | (3)        | (4)        | (5)        | (6)        | (7)        |
|----------------------------------------|------------|------------|------------|------------|------------|------------|------------|
|                                        | 1950-59    | 1960-69    | 1970-79    | 1980-89    | 1990-99    | 2000-09    | 2010-20    |
| Education: None/Primary                | (baseline) |
|                                        | (.)        | (.)        | (.)        | (.)        | (.)        | (.)        | (.)        |
| Education: Secondary                   | -0.123**   | -0.050**   | -0.034     | -0.026     | -0.014     | -0.011     | 0.070**    |
|                                        | (0.048)    | (0.024)    | (0.034)    | (0.030)    | (0.028)    | (0.023)    | (0.032)    |
| Education: University                  | -0.243**   | -0.030     | -0.135**   | 0.012      | 0.043      | 0.041      | 0.137***   |
|                                        | (0.098)    | (0.050)    | (0.064)    | (0.042)    | (0.033)    | (0.033)    | (0.036)    |
| Income group: Bottom 50%               | (baseline) | (baseline) | (baseline) | (baseline) |            | (baseline) | (baseline) |
|                                        | (.)        | (.)        | (.)        | (.)        |            | (.)        | (.)        |
| Income group: Middle 40%               | 0.075*     | -0.040**   | 0.016      | 0.013      |            | -0.059     | 0.089***   |
|                                        | (0.044)    | (0.017)    | (0.028)    | (0.024)    |            | (0.057)    | (0.018)    |
| Income group: Top 10%                  | 0.063      | -0.096***  | -0.008     | 0.012      |            | -0.076     | 0.097***   |
|                                        | (0.091)    | (0.035)    | (0.049)    | (0.042)    |            | (0.070)    | (0.020)    |
| Age: 20-39                             | (baseline) |
|                                        | (.)        | (.)        | (.)        | (.)        | (.)        | (.)        | (.)        |
| Age: 40-59                             | -0.124**   | -0.036*    | -0.011     | -0.026     | 0.020      | 0.018      | 0.047**    |
|                                        | (0.050)    | (0.022)    | (0.032)    | (0.028)    | (0.027)    | (0.021)    | (0.021)    |
| Age: 60+                               | -0.080     | -0.112***  | -0.079**   | -0.055     | -0.023     | 0.017      | 0.150***   |
|                                        | (0.065)    | (0.027)    | (0.038)    | (0.036)    | (0.038)    | (0.025)    | (0.026)    |
| Gender: Woman                          | (baseline) |
|                                        | (.)        | (.)        | (.)        | (.)        | (.)        | (.)        | (.)        |
| Gender: Man                            | 0.293***   | 0.104***   | 0.023      | 0.014      | 0.014      | 0.010      | -0.025     |
|                                        | (0.052)    | (0.023)    | (0.032)    | (0.023)    | (0.021)    | (0.017)    | (0.018)    |
| Religion: None                         | (baseline) |
|                                        | (.)        | (.)        | (.)        | (.)        | (.)        | (.)        | (.)        |
| Religion: Catholic                     | 0.047      | -0.161***  | -0.159***  | -0.106*    | -0.165***  | -0.178***  | -0.222***  |
|                                        | (0.179)    | (0.045)    | (0.055)    | (0.065)    | (0.043)    | (0.043)    | (0.065)    |
| Religion: Other                        | -0.186     |            |            | 0.071      | -0.061     | -0.081     | -0.419***  |
|                                        | (0.197)    |            |            | (0.060)    | (0.045)    | (0.073)    | (0.106)    |
| Religious practice: Never              | (baseline) |
|                                        | (.)        | (.)        | (.)        | (.)        | (.)        | (.)        | (.)        |
| Religious practice: Less than monthly  | -0.027     | -0.067     | -0.073     | -0.130***  | -0.137***  | -0.140***  | -0.053**   |
|                                        | (0.082)    | (0.042)    | (0.049)    | (0.040)    | (0.035)    | (0.026)    | (0.022)    |
| Religious practice: Monthly or more    | -0.425***  | -0.377***  | -0.424***  | -0.433***  | -0.208***  | -0.183***  | -0.107***  |
|                                        | (0.074)    | (0.042)    | (0.048)    | (0.039)    | (0.033)    | (0.024)    | (0.024)    |
| Location: Urban                        | (baseline) | (baseline) |            |            | (baseline) | (baseline) | (baseline) |
|                                        | (.)        | (.)        |            |            | (.)        | (.)        | (.)        |
| Location: Rural                        | -0.141***  | -0.029     |            |            | 0.006      | -0.007     | -0.024     |
|                                        | (0.046)    | (0.023)    |            |            | (0.040)    | (0.021)    | (0.042)    |
| Employment status: Employed            | (baseline) |
|                                        | (.)        | (.)        | (.)        | (.)        | (.)        | (.)        | (.)        |
| Employment status: Unemployed/Inactive | 0.109**    | -0.062***  | -0.069**   | 0.014      | -0.021     | 0.004      | -0.013     |
|                                        | (0.050)    | (0.024)    | (0.033)    | (0.025)    | (0.022)    | (0.019)    | (0.020)    |
| Marital status: Single                 | (baseline) |
|                                        | (.)        | (.)        | (.)        | (.)        | (.)        | (.)        | (.)        |
| Marital status: Married/With partner   | -0.016     | 0.053**    | 0.007      | 0.016      | 0.010      | 0.020      | -0.001     |
|                                        | (0.050)    | (0.022)    | (0.030)    | (0.032)    | (0.027)    | (0.018)    | (0.021)    |
| Region: Center                         | (baseline) | (baseline) |            | (baseline) | (baseline) | (baseline) | (baseline) |
|                                        | (.)        | (.)        |            | (.)        | (.)        | (.)        | (.)        |
| Region: Islands                        | -0.270***  | -0.139***  |            | -0.315***  | -0.066     | -0.091**   | 0.005      |
|                                        | (0.082)    | (0.035)    |            | (0.073)    | (0.043)    | (0.040)    | (0.034)    |
| Region: North                          | 0.021      | -0.031     |            | -0.044     | -0.114***  | -0.049*    | 0.021      |
|                                        | (0.059)    | (0.026)    |            | (0.046)    | (0.031)    | (0.029)    | (0.025)    |
| Region: South                          | -0.219***  | -0.136***  |            | -0.180***  | -0.072**   | -0.031     | 0.004      |
|                                        | (0.065)    | (0.029)    |            | (0.054)    | (0.035)    | (0.033)    | (0.029)    |
| Constant                               | 0.696***   | 0.985***   | 0.948***   | 0.954***   | 0.838***   | 0.799***   | 0.478***   |
|                                        | (0.179)    | (0.042)    | (0.052)    | (0.068)    | (0.058)    | (0.074)    | (0.074)    |



|              |      |      |      |      |      |      |       |
|--------------|------|------|------|------|------|------|-------|
| R-squared    | 0.34 | 0.21 | 0.21 | 0.18 | 0.07 | 0.04 | 0.08  |
| Observations | 2197 | 7780 | 3333 | 5608 | 4243 | 5268 | 12033 |
| Clusters     | 523  | 2422 | 1238 | 1602 | 2406 | 2867 | 2045  |

**Note:** The table reports the effect of a set of individual characteristics on the probability to vote for Social Democrats / Socialists / Communists / Greens by decade in Italy. The original survey dataset is duplicated for each income bracket to approximate income deciles (see methodology). The number of clusters corresponds to the number of surveyed individuals in each decade. Robust standard errors clustered at the individual level.

**Table E12 - Determinants of support for LSAP / Greens / Other left in Luxembourg**

|                                        | (1)                  | (2)                  | (3)                  | (4)                  | (5)                 |
|----------------------------------------|----------------------|----------------------|----------------------|----------------------|---------------------|
|                                        | 1970-79              | 1980-89              | 1990-99              | 2000-09              | 2010-20             |
| Education: None/Primary                | (baseline)<br>(.)    | (baseline)<br>(.)    | (baseline)<br>(.)    | (baseline)<br>(.)    | (baseline)<br>(.)   |
| Education: Secondary                   | -0.103***<br>(0.027) | -0.135***<br>(0.026) | -0.077***<br>(0.027) | 0.099<br>(0.064)     | -0.007<br>(0.071)   |
| Education: University                  | -0.228***<br>(0.040) | -0.190***<br>(0.033) | -0.061**<br>(0.031)  | 0.082<br>(0.062)     | 0.050<br>(0.070)    |
| Income group: Bottom 50%               | (baseline)<br>(.)    | (baseline)<br>(.)    | (baseline)<br>(.)    | (baseline)<br>(.)    |                     |
| Income group: Middle 40%               | -0.051**<br>(0.022)  | -0.076***<br>(0.018) | -0.060***<br>(0.018) | -0.028<br>(0.047)    |                     |
| Income group: Top 10%                  | -0.122***<br>(0.033) | -0.103***<br>(0.026) | -0.079***<br>(0.021) | -0.185***<br>(0.067) |                     |
| Age: 20-39                             | (baseline)<br>(.)    | (baseline)<br>(.)    | (baseline)<br>(.)    | (baseline)<br>(.)    | (baseline)<br>(.)   |
| Age: 40-59                             | -0.031<br>(0.024)    | -0.117***<br>(0.018) | -0.095***<br>(0.017) | 0.104*<br>(0.055)    | 0.010<br>(0.058)    |
| Age: 60+                               | -0.110***<br>(0.035) | -0.228***<br>(0.025) | -0.202***<br>(0.020) | -0.019<br>(0.073)    | -0.067<br>(0.066)   |
| Gender: Woman                          | (baseline)<br>(.)    | (baseline)<br>(.)    | (baseline)<br>(.)    | (baseline)<br>(.)    | (baseline)<br>(.)   |
| Gender: Man                            | 0.089***<br>(0.023)  | 0.044***<br>(0.017)  | -0.014<br>(0.015)    | 0.003<br>(0.042)     | 0.049<br>(0.043)    |
| Religion: None                         | (baseline)<br>(.)    | (baseline)<br>(.)    | (baseline)<br>(.)    | (baseline)<br>(.)    | (baseline)<br>(.)   |
| Religion: Catholic                     | -0.077<br>(0.055)    | -0.181***<br>(0.044) | -0.204***<br>(0.041) | -0.032<br>(0.074)    | -0.124<br>(0.078)   |
| Religion: Other Christian              | 0.102<br>(0.137)     | 0.019<br>(0.147)     | 0.038<br>(0.107)     | 0.091<br>(0.085)     | 0.113<br>(0.130)    |
| Religion: Other                        | -0.015<br>(0.204)    | 0.087<br>(0.109)     | -0.121<br>(0.101)    | 0.377***<br>(0.086)  | -0.072<br>(0.134)   |
| Religious practice: Never              | (baseline)<br>(.)    | (baseline)<br>(.)    | (baseline)<br>(.)    | (baseline)<br>(.)    | (baseline)<br>(.)   |
| Religious practice: Less than monthly  | -0.168***<br>(0.040) | -0.112***<br>(0.032) | -0.115***<br>(0.034) | -0.239***<br>(0.067) | -0.133*<br>(0.071)  |
| Religious practice: Monthly or more    | -0.379***<br>(0.040) | -0.353***<br>(0.033) | -0.286***<br>(0.035) | -0.333***<br>(0.078) | -0.200**<br>(0.080) |
| Location: Urban                        | (baseline)<br>(.)    | (baseline)<br>(.)    | (baseline)<br>(.)    |                      | (baseline)<br>(.)   |
| Location: Rural                        | -0.114***<br>(0.019) | -0.081***<br>(0.015) | -0.034*<br>(0.018)   |                      | -0.066<br>(0.047)   |
| Employment status: Employed            | (baseline)<br>(.)    | (baseline)<br>(.)    | (baseline)<br>(.)    | (baseline)<br>(.)    | (baseline)<br>(.)   |
| Employment status: Unemployed/Inactive | 0.044*<br>(0.026)    | 0.027<br>(0.020)     | 0.014<br>(0.017)     | 0.019<br>(0.059)     | -0.028<br>(0.068)   |
| Marital status: Single                 | (baseline)<br>(.)    | (baseline)<br>(.)    | (baseline)<br>(.)    | (baseline)<br>(.)    | (baseline)<br>(.)   |
| Marital status: Married/With partner   | 0.006<br>(0.023)     | 0.011<br>(0.018)     | 0.038**<br>(0.016)   | 0.052<br>(0.046)     | 0.065<br>(0.074)    |

|                |          |          |          |          |            |
|----------------|----------|----------|----------|----------|------------|
| Region: Centre |          |          |          |          | (baseline) |
|                |          |          |          |          | (.)        |
| Region: East   |          |          |          |          | 0.134*     |
|                |          |          |          |          | (0.075)    |
| Region: North  |          |          |          |          | 0.104      |
|                |          |          |          |          | (0.073)    |
| Region: South  |          |          |          |          | 0.091*     |
|                |          |          |          |          | (0.051)    |
| Constant       | 0.821*** | 0.996*** | 0.847*** | 0.411*** | 0.518***   |
|                | (0.059)  | (0.049)  | (0.047)  | (0.086)  | (0.095)    |
| R-squared      | 0.10     | 0.10     | 0.07     | 0.12     | 0.10       |
| Observations   | 7744     | 8821     | 10633    | 1705     | 692        |
| Clusters       | 3561     | 4761     | 6229     | 761      | 466        |

**Note:** The table reports the effect of a set of individual characteristics on the probability to vote for LSAP / Greens / Other left in Luxembourg. The original survey dataset is duplicated for each income bracket to approximate income deciles (see methodology). The number of clusters corresponds to the number of surveyed individuals in each decade. Robust standard errors clustered at the individual level.

**Table E13 - Determinants of support for PvdA / D66 / Greens / Other left in the Netherlands**

|                                        | (1)        | (2)        | (3)        | (4)        | (5)        | (6)        |
|----------------------------------------|------------|------------|------------|------------|------------|------------|
|                                        | 1960-69    | 1970-79    | 1980-89    | 1990-99    | 2000-09    | 2010-20    |
| Education: None/Primary                | (baseline) | (baseline) | (baseline) | (baseline) | (baseline) | (baseline) |
|                                        | (.)        | (.)        | (.)        | (.)        | (.)        | (.)        |
| Education: Secondary                   | -0.088***  | -0.093***  | -0.136***  | -0.136***  | 0.058***   | -0.004     |
|                                        | (0.022)    | (0.016)    | (0.015)    | (0.026)    | (0.018)    | (0.020)    |
| Education: University                  | -0.077*    | -0.127***  | -0.099***  | -0.008     | 0.154***   | 0.100***   |
|                                        | (0.042)    | (0.026)    | (0.021)    | (0.031)    | (0.024)    | (0.022)    |
| Education: Postgraduate                |            |            |            |            | 0.194***   | 0.165***   |
|                                        |            |            |            |            | (0.042)    | (0.037)    |
| Income group: Bottom 50%               | (baseline) | (baseline) | (baseline) | (baseline) | (baseline) | (baseline) |
|                                        | (.)        | (.)        | (.)        | (.)        | (.)        | (.)        |
| Income group: Middle 40%               | -0.014     | -0.068***  | -0.110***  | -0.071***  | -0.028*    | -0.028*    |
|                                        | (0.024)    | (0.018)    | (0.014)    | (0.020)    | (0.017)    | (0.014)    |
| Income group: Top 10%                  | -0.204***  | -0.226***  | -0.234***  | -0.184***  | -0.168***  | -0.103***  |
|                                        | (0.037)    | (0.029)    | (0.023)    | (0.028)    | (0.026)    | (0.020)    |
| Age: 20-39                             | (baseline) | (baseline) | (baseline) | (baseline) | (baseline) | (baseline) |
|                                        | (.)        | (.)        | (.)        | (.)        | (.)        | (.)        |
| Age: 40-59                             | -0.055**   | -0.023     | -0.047***  | 0.020      | 0.102***   | 0.065***   |
|                                        | (0.023)    | (0.017)    | (0.014)    | (0.020)    | (0.019)    | (0.017)    |
| Age: 60+                               | -0.064**   | -0.077***  | -0.101***  | -0.131***  | 0.028      | 0.014      |
|                                        | (0.030)    | (0.021)    | (0.019)    | (0.026)    | (0.025)    | (0.021)    |
| Gender: Woman                          | (baseline) | (baseline) | (baseline) | (baseline) | (baseline) | (baseline) |
|                                        | (.)        | (.)        | (.)        | (.)        | (.)        | (.)        |
| Gender: Man                            | 0.021      | -0.032*    | 0.007      | -0.087***  | -0.061***  | -0.068***  |
|                                        | (0.026)    | (0.017)    | (0.014)    | (0.018)    | (0.015)    | (0.013)    |
| Religion: None                         | (baseline) | (baseline) | (baseline) | (baseline) | (baseline) | (baseline) |
|                                        | (.)        | (.)        | (.)        | (.)        | (.)        | (.)        |
| Religion: Catholic                     | -0.229***  | -0.131***  | -0.133***  | -0.131***  | -0.154***  | -0.108***  |
|                                        | (0.046)    | (0.031)    | (0.023)    | (0.032)    | (0.026)    | (0.021)    |
| Religion: Other Christian              | -0.128***  | -0.129***  | -0.138***  | -0.195***  | -0.194***  | -0.182***  |
|                                        | (0.042)    | (0.027)    | (0.022)    | (0.030)    | (0.025)    | (0.023)    |
| Religion: Other                        | 0.008      | -0.076     | 0.002      | 0.026      | -0.050     | -0.031     |
|                                        | (0.073)    | (0.055)    | (0.034)    | (0.049)    | (0.042)    | (0.035)    |
| Religion: Muslim                       |            |            |            |            | 0.537***   | 0.364***   |
|                                        |            |            |            |            | (0.056)    | (0.062)    |
| Religious practice: Never              | (baseline) | (baseline) | (baseline) | (baseline) | (baseline) | (baseline) |
|                                        | (.)        | (.)        | (.)        | (.)        | (.)        | (.)        |
| Religious practice: Less than monthly  | -0.087*    | -0.168***  | -0.158***  | -0.071**   | -0.076**   | 0.011      |
|                                        | (0.052)    | (0.034)    | (0.025)    | (0.035)    | (0.030)    | (0.029)    |
| Religious practice: Monthly or more    | -0.388***  | -0.440***  | -0.345***  | -0.242***  | -0.206***  | -0.150***  |
|                                        | (0.039)    | (0.026)    | (0.019)    | (0.028)    | (0.023)    | (0.022)    |
| Location: Urban                        | (baseline) | (baseline) | (baseline) | (baseline) | (baseline) | (baseline) |
|                                        | (.)        | (.)        | (.)        | (.)        | (.)        | (.)        |
| Location: Rural                        | -0.023     | -0.053***  | -0.041***  | -0.034*    | -0.022     | -0.060***  |
|                                        | (0.021)    | (0.016)    | (0.014)    | (0.018)    | (0.016)    | (0.015)    |
| Employment status: Employed            | (baseline) | (baseline) | (baseline) | (baseline) | (baseline) | (baseline) |
|                                        | (.)        | (.)        | (.)        | (.)        | (.)        | (.)        |
| Employment status: Unemployed/Inactive | -0.002     | -0.022     | 0.010      | 0.027      | 0.011      | 0.044**    |
|                                        | (0.028)    | (0.019)    | (0.016)    | (0.022)    | (0.020)    | (0.017)    |

|                                      |            |            |            |            |            |            |
|--------------------------------------|------------|------------|------------|------------|------------|------------|
| Marital status: Single               | (baseline) | (baseline) | (baseline) | (baseline) | (baseline) | (baseline) |
|                                      | (.)        | (.)        | (.)        | (.)        | (.)        | (.)        |
| Marital status: Married/With partner | 0.009      | -0.004     | 0.023      | -0.024     | -0.073***  | -0.059***  |
|                                      | (0.028)    | (0.023)    | (0.014)    | (0.019)    | (0.017)    | (0.014)    |
| Region: East                         | (baseline) | (baseline) | (baseline) | (baseline) | (baseline) | (baseline) |
|                                      | (.)        | (.)        | (.)        | (.)        | (.)        | (.)        |
| Region: North                        | -0.044     | 0.017      | 0.033      | 0.073*     | 0.078***   | 0.077***   |
|                                      | (0.034)    | (0.025)    | (0.021)    | (0.040)    | (0.027)    | (0.024)    |
| Region: South                        | 0.018      | 0.048**    | 0.024      | 0.043      | 0.012      | 0.012      |
|                                      | (0.029)    | (0.023)    | (0.019)    | (0.035)    | (0.023)    | (0.020)    |
| Region: West                         | -0.027     | -0.019     | -0.024     | -0.038     | -0.033*    | -0.007     |
|                                      | (0.028)    | (0.019)    | (0.016)    | (0.031)    | (0.019)    | (0.017)    |
| Constant                             | 0.818***   | 0.947***   | 0.846***   | 0.858***   | 0.526***   | 0.529***   |
|                                      | (0.053)    | (0.033)    | (0.025)    | (0.040)    | (0.029)    | (0.028)    |
| R-squared                            | 0.31       | 0.29       | 0.21       | 0.17       | 0.16       | 0.09       |
| Observations                         | 3025       | 7479       | 10041      | 5401       | 6139       | 9884       |
| Clusters                             | 1753       | 2186       | 2110       | 1956       | 2590       | 3215       |

**Note:** The table reports the effect of a set of individual characteristics on the probability to vote for PvdA / D66 / Greens / Other left by decade in the Netherlands. The original survey dataset is duplicated for each income bracket to approximate income deciles (see methodology). The number of clusters corresponds to the number of surveyed individuals in each decade. Robust standard errors clustered at the individual level.

**Table E14 - Determinants of support for Labour / Greens / Other left in New Zealand**

|                                        | (1)        | (2)        | (3)        | (4)        | (5)        |
|----------------------------------------|------------|------------|------------|------------|------------|
|                                        | 1970-79    | 1980-89    | 1990-99    | 2000-09    | 2010-20    |
| Education: None/Primary                | (baseline) | (baseline) | (baseline) | (baseline) | (baseline) |
|                                        | (.)        | (.)        | (.)        | (.)        | (.)        |
| Education: Secondary                   | -0.096***  | -0.080***  | -0.029***  | -0.020     | -0.032*    |
|                                        | (0.021)    | (0.025)    | (0.011)    | (0.016)    | (0.018)    |
| Education: University                  | -0.073**   | -0.119***  | -0.019     | 0.031      | 0.072***   |
|                                        | (0.030)    | (0.039)    | (0.017)    | (0.022)    | (0.023)    |
| Education: Postgraduate                |            |            |            | 0.151***   | 0.159***   |
|                                        |            |            |            | (0.028)    | (0.029)    |
| Income group: Bottom 50%               | (baseline) | (baseline) | (baseline) | (baseline) | (baseline) |
|                                        | (.)        | (.)        | (.)        | (.)        | (.)        |
| Income group: Middle 40%               | -0.015     | -0.012     | -0.043***  | -0.124***  | -0.098***  |
|                                        | (0.023)    | (0.021)    | (0.013)    | (0.015)    | (0.017)    |
| Income group: Top 10%                  | -0.208***  | -0.072**   | -0.132***  | -0.169***  | -0.183***  |
|                                        | (0.032)    | (0.035)    | (0.019)    | (0.027)    | (0.027)    |
| Age: 20-39                             | (baseline) | (baseline) | (baseline) | (baseline) | (baseline) |
|                                        | (.)        | (.)        | (.)        | (.)        | (.)        |
| Age: 40-59                             | 0.002      | -0.067***  | 0.038***   | 0.013      | -0.008     |
|                                        | (0.021)    | (0.025)    | (0.012)    | (0.017)    | (0.021)    |
| Age: 60+                               | -0.016     | -0.101***  | 0.029*     | -0.010     | -0.105***  |
|                                        | (0.027)    | (0.032)    | (0.015)    | (0.021)    | (0.021)    |
| Gender: Woman                          | (baseline) | (baseline) | (baseline) | (baseline) | (baseline) |
|                                        | (.)        | (.)        | (.)        | (.)        | (.)        |
| Gender: Man                            | 0.056***   | 0.001      | -0.051***  | -0.086***  | -0.043***  |
|                                        | (0.021)    | (0.023)    | (0.010)    | (0.014)    | (0.015)    |
| Religion: None                         | (baseline) | (baseline) | (baseline) | (baseline) | (baseline) |
|                                        | (.)        | (.)        | (.)        | (.)        | (.)        |
| Religion: Catholic                     | 0.051      | -0.024     | -0.010     | -0.038     | -0.062**   |
|                                        | (0.038)    | (0.060)    | (0.019)    | (0.027)    | (0.029)    |
| Religion: Other Christian              | -0.090***  | -0.082*    | -0.105***  | -0.111***  | -0.101***  |
|                                        | (0.031)    | (0.049)    | (0.014)    | (0.020)    | (0.020)    |
| Religion: Other                        | -0.055     | 0.173*     | -0.014     | 0.007      | 0.034      |
|                                        | (0.049)    | (0.091)    | (0.029)    | (0.035)    | (0.036)    |
| Religion: Muslim                       |            |            |            | 0.154      | 0.305***   |
|                                        |            |            |            | (0.199)    | (0.082)    |
| Religious practice: Never              | (baseline) | (baseline) | (baseline) | (baseline) | (baseline) |
|                                        | (.)        | (.)        | (.)        | (.)        | (.)        |
| Religious practice: Less than monthly  | -0.059*    | -0.025     | -0.042***  | -0.002     | 0.008      |
|                                        | (0.032)    | (0.048)    | (0.013)    | (0.019)    | (0.021)    |
| Religious practice: Monthly or more    | -0.079**   | -0.048     | -0.123***  | -0.128***  | -0.016     |
|                                        | (0.032)    | (0.049)    | (0.014)    | (0.020)    | (0.022)    |
| Location: Urban                        |            |            | (baseline) | (baseline) | (baseline) |
|                                        |            |            | (.)        | (.)        | (.)        |
| Location: Rural                        |            |            | -0.089***  | -0.098***  | -0.077***  |
|                                        |            |            | (0.012)    | (0.017)    | (0.022)    |
| Employment status: Employed            | (baseline) | (baseline) | (baseline) | (baseline) | (baseline) |
|                                        | (.)        | (.)        | (.)        | (.)        | (.)        |
| Employment status: Unemployed/Inactive | -0.007     | 0.007      | 0.064***   | 0.030*     | 0.060***   |
|                                        | (0.023)    | (0.026)    | (0.013)    | (0.017)    | (0.017)    |

|                                      |            |            |            |            |            |
|--------------------------------------|------------|------------|------------|------------|------------|
| Marital status: Single               | (baseline) | (baseline) | (baseline) | (baseline) | (baseline) |
|                                      | (.)        | (.)        | (.)        | (.)        | (.)        |
| Marital status: Married/With partner | 0.020      | 0.029      | -0.073***  | -0.037**   | -0.037**   |
|                                      | (0.022)    | (0.023)    | (0.011)    | (0.017)    | (0.019)    |
| Race/ethnicity/language: European    | (baseline) | (baseline) | (baseline) | (baseline) | (baseline) |
|                                      | (.)        | (.)        | (.)        | (.)        | (.)        |
| Race/ethnicity/language: Maori       | 0.293***   | 0.277***   | 0.173***   | 0.364***   | 0.339***   |
|                                      | (0.057)    | (0.052)    | (0.019)    | (0.023)    | (0.021)    |
| Race/ethnicity/language: Other       | 0.214***   | 0.116      | 0.177***   | 0.212***   | 0.046      |
|                                      | (0.079)    | (0.088)    | (0.025)    | (0.038)    | (0.034)    |
| Region: Auckland                     |            | (baseline) | (baseline) | (baseline) | (baseline) |
|                                      |            | (.)        | (.)        | (.)        | (.)        |
| Region: Other                        |            | 0.042      | 0.118***   | 0.093***   | 0.032*     |
|                                      |            | (0.033)    | (0.024)    | (0.019)    | (0.017)    |
| Region: Wellington                   |            | 0.068      | 0.077**    | 0.117***   | 0.104***   |
|                                      |            | (0.048)    | (0.032)    | (0.028)    | (0.024)    |
| Constant                             | 0.670***   | 0.688***   | 0.659***   | 0.550***   | 0.516***   |
|                                      | (0.035)    | (0.132)    | (0.025)    | (0.029)    | (0.031)    |
| R-squared                            | 0.05       | 0.04       | 0.06       | 0.11       | 0.10       |
| Observations                         | 6539       | 8027       | 26066      | 17102      | 17512      |
| Clusters                             | 1581       | 1482       | 5815       | 3680       | 3419       |

**Note:** The table reports the effect of a set of individual characteristics on the probability to vote for Labour / Greens / Other left by decade in New Zealand. The original survey dataset is duplicated for each income bracket to approximate income deciles (see methodology). The number of clusters corresponds to the number of surveyed individuals in each decade. Robust standard errors clustered at the individual level.

**Table E15 - Determinants of support for Labour Party / Socialist Left Party / Other left in Norway**

|                                        | (1)        | (2)        | (3)        | (4)        | (5)        | (6)        | (7)        |
|----------------------------------------|------------|------------|------------|------------|------------|------------|------------|
|                                        | 1950-59    | 1960-69    | 1970-79    | 1980-89    | 1990-99    | 2000-09    | 2010-20    |
| Education: None/Primary                | (baseline) |
|                                        | (.)        | (.)        | (.)        | (.)        | (.)        | (.)        | (.)        |
| Education: Secondary                   | -0.373***  | -0.344***  | -0.261***  | -0.216***  | -0.110***  | -0.018     | -0.014     |
|                                        | (0.035)    | (0.025)    | (0.019)    | (0.014)    | (0.023)    | (0.018)    | (0.033)    |
| Education: University                  | -0.457***  | -0.409***  | -0.310***  | -0.218***  | -0.146***  | 0.029      | 0.051      |
|                                        | (0.053)    | (0.028)    | (0.027)    | (0.026)    | (0.026)    | (0.019)    | (0.035)    |
| Income group: Bottom 50%               | (baseline) |
|                                        | (.)        | (.)        | (.)        | (.)        | (.)        | (.)        | (.)        |
| Income group: Middle 40%               | 0.005      | -0.001     | -0.013     | -0.045***  | 0.030      | -0.035**   | 0.009      |
|                                        | (0.031)    | (0.021)    | (0.016)    | (0.015)    | (0.021)    | (0.017)    | (0.023)    |
| Income group: Top 10%                  | -0.239***  | -0.194***  | -0.168***  | -0.239***  | -0.100***  | -0.146***  | -0.151***  |
|                                        | (0.045)    | (0.029)    | (0.024)    | (0.023)    | (0.031)    | (0.024)    | (0.030)    |
| Age: 20-39                             | (baseline) |
|                                        | (.)        | (.)        | (.)        | (.)        | (.)        | (.)        | (.)        |
| Age: 40-59                             | -0.091***  | -0.048**   | -0.030     | 0.046***   | -0.022     | 0.014      | -0.034     |
|                                        | (0.030)    | (0.021)    | (0.019)    | (0.016)    | (0.019)    | (0.016)    | (0.022)    |
| Age: 60+                               | -0.226***  | -0.122***  | -0.129***  | -0.018     | -0.099***  | -0.058***  | -0.051**   |
|                                        | (0.043)    | (0.025)    | (0.022)    | (0.017)    | (0.023)    | (0.020)    | (0.025)    |
| Gender: Woman                          | (baseline) |
|                                        | (.)        | (.)        | (.)        | (.)        | (.)        | (.)        | (.)        |
| Gender: Man                            | 0.013      | 0.059***   | 0.035*     | -0.022*    | -0.037**   | -0.105***  | -0.080***  |
|                                        | (0.039)    | (0.019)    | (0.018)    | (0.013)    | (0.016)    | (0.014)    | (0.017)    |
| Location: Urban                        | (baseline) |
|                                        | (.)        | (.)        | (.)        | (.)        | (.)        | (.)        | (.)        |
| Location: Rural                        | -0.113***  | -0.128***  | -0.095***  | -0.142***  | -0.129***  | -0.063***  | -0.113***  |
|                                        | (0.029)    | (0.021)    | (0.027)    | (0.016)    | (0.028)    | (0.015)    | (0.020)    |
| Employment status: Employed            | (baseline) | (baseline) | (baseline) |            |            | (baseline) | (baseline) |
|                                        | (.)        | (.)        | (.)        |            |            | (.)        | (.)        |
| Employment status: Unemployed/Inactive | -0.034     | 0.059      | 0.016      |            |            | 0.015      | -0.002     |
|                                        | (0.043)    | (0.039)    | (0.024)    |            |            | (0.018)    | (0.023)    |
| Marital status: Single                 | (baseline) |
|                                        | (.)        | (.)        | (.)        | (.)        | (.)        | (.)        | (.)        |
| Marital status: Married/With partner   | 0.119***   | 0.104***   | 0.041*     | 0.093***   | -0.016     | -0.010     | -0.031     |
|                                        | (0.037)    | (0.024)    | (0.021)    | (0.017)    | (0.022)    | (0.017)    | (0.021)    |
| Region: East                           |            |            |            | (baseline) | (baseline) | (baseline) | (baseline) |
|                                        |            |            |            | (.)        | (.)        | (.)        | (.)        |
| Region: North                          |            |            |            | -0.053*    | -0.048     | -0.004     | -0.003     |
|                                        |            |            |            | (0.027)    | (0.033)    | (0.027)    | (0.036)    |
| Region: South and Oslo                 |            |            |            | -0.136***  | -0.079***  | -0.065***  | -0.082***  |
|                                        |            |            |            | (0.020)    | (0.025)    | (0.020)    | (0.028)    |
| Region: Trondelag                      |            |            |            | -0.026     | -0.003     | -0.011     | -0.014     |
|                                        |            |            |            | (0.027)    | (0.034)    | (0.027)    | (0.038)    |
| Region: West                           |            |            |            | -0.212***  | -0.160***  | -0.148***  | -0.146***  |
|                                        |            |            |            | (0.021)    | (0.025)    | (0.020)    | (0.029)    |
| Constant                               | 0.705***   | 0.533***   | 0.630***   | 0.678***   | 0.738***   | 0.594***   | 0.585***   |
|                                        | (0.047)    | (0.039)    | (0.028)    | (0.024)    | (0.035)    | (0.028)    | (0.047)    |
| R-squared                              | 0.18       | 0.15       | 0.09       | 0.11       | 0.04       | 0.04       | 0.05       |
| Observations                           | 2404       | 5125       | 8931       | 12608      | 5085       | 7359       | 4433       |
| Clusters                               | 1170       | 1598       | 2393       | 2184       | 2119       | 2082       | 1887       |

**Note:** The table reports the effect of a set of individual characteristics on the probability to vote for Labour Party / Socialist Left Party / Other left by decade in Norway. The original survey dataset is duplicated for each income bracket to approximate income deciles (see methodology). The number of clusters corresponds to the number of surveyed individuals in each decade. Robust standard errors clustered at the individual level.



**Table E16 - Determinants of support for Socialists / Communists / Greens / Left bloc in Portugal**

|                                        | (1)                  | (2)                  | (3)                  | (4)                  |
|----------------------------------------|----------------------|----------------------|----------------------|----------------------|
|                                        | 1980-89              | 1990-99              | 2000-09              | 2010-20              |
| Education: None/Primary                | (baseline)<br>(.)    | (baseline)<br>(.)    | (baseline)<br>(.)    | (baseline)<br>(.)    |
| Education: Secondary                   | -0.108**<br>(0.048)  | -0.038<br>(0.046)    | -0.028<br>(0.022)    | -0.023<br>(0.037)    |
| Education: University                  | -0.172***<br>(0.065) | -0.090<br>(0.068)    | -0.120***<br>(0.030) | -0.175***<br>(0.055) |
| Income group: Bottom 50%               | (baseline)<br>(.)    | (baseline)<br>(.)    | (baseline)<br>(.)    | (baseline)<br>(.)    |
| Income group: Middle 40%               | 0.002<br>(0.037)     | -0.069*<br>(0.040)   | -0.023<br>(0.018)    | -0.042<br>(0.035)    |
| Income group: Top 10%                  | -0.140*<br>(0.079)   | -0.150**<br>(0.066)  | -0.130***<br>(0.029) | -0.124**<br>(0.059)  |
| Age: 20-39                             | (baseline)<br>(.)    | (baseline)<br>(.)    | (baseline)<br>(.)    | (baseline)<br>(.)    |
| Age: 40-59                             | -0.006<br>(0.043)    | -0.001<br>(0.043)    | 0.011<br>(0.023)     | -0.007<br>(0.042)    |
| Age: 60+                               | -0.103**<br>(0.049)  | -0.020<br>(0.048)    | -0.103***<br>(0.028) | -0.024<br>(0.050)    |
| Gender: Woman                          | (baseline)<br>(.)    | (baseline)<br>(.)    | (baseline)<br>(.)    | (baseline)<br>(.)    |
| Gender: Man                            | 0.055<br>(0.037)     | 0.018<br>(0.035)     | -0.019<br>(0.019)    | -0.015<br>(0.029)    |
| Religion: None                         | (baseline)<br>(.)    | (baseline)<br>(.)    | (baseline)<br>(.)    | (baseline)<br>(.)    |
| Religion: Catholic                     | -0.147<br>(0.107)    | -0.093<br>(0.098)    | -0.117<br>(0.081)    | -0.116**<br>(0.058)  |
| Religion: Other                        | 0.003<br>(0.161)     | -0.029<br>(0.159)    | -0.143<br>(0.098)    | -0.030<br>(0.099)    |
| Religious practice: Never              | (baseline)<br>(.)    | (baseline)<br>(.)    | (baseline)<br>(.)    | (baseline)<br>(.)    |
| Religious practice: Less than monthly  | -0.043<br>(0.066)    | -0.156**<br>(0.066)  | 0.001<br>(0.030)     | -0.062<br>(0.047)    |
| Religious practice: Monthly or more    | -0.168***<br>(0.065) | -0.221***<br>(0.068) | -0.108***<br>(0.030) | -0.192***<br>(0.049) |
| Location: Urban                        | (baseline)<br>(.)    | (baseline)<br>(.)    | (baseline)<br>(.)    | (baseline)<br>(.)    |
| Location: Rural                        | -0.105***<br>(0.036) | 0.021<br>(0.037)     | -0.054***<br>(0.018) | -0.043<br>(0.034)    |
| Employment status: Employed            | (baseline)<br>(.)    | (baseline)<br>(.)    | (baseline)<br>(.)    | (baseline)<br>(.)    |
| Employment status: Unemployed/Inactive | -0.063<br>(0.041)    | -0.101**<br>(0.040)  | 0.021<br>(0.020)     | 0.060*<br>(0.035)    |
| Marital status: Single                 | (baseline)<br>(.)    | (baseline)<br>(.)    | (baseline)<br>(.)    | (baseline)<br>(.)    |
| Marital status: Married/With partner   | 0.031<br>(0.035)     | 0.095***<br>(0.035)  | -0.008<br>(0.021)    | -0.004<br>(0.033)    |
| Region: Alentejo                       | (baseline)<br>(.)    | (baseline)<br>(.)    | (baseline)<br>(.)    | (baseline)<br>(.)    |

|                 |                      |                      |                      |                      |
|-----------------|----------------------|----------------------|----------------------|----------------------|
| Region: Algarve | -0.511***<br>(0.061) | -0.566***<br>(0.063) | -0.188***<br>(0.054) | -0.200**<br>(0.096)  |
| Region: Center  | -0.242***<br>(0.062) | -0.283***<br>(0.065) | -0.234***<br>(0.038) | -0.367***<br>(0.069) |
| Region: Lisbon  | -0.206***<br>(0.053) | -0.227***<br>(0.056) | -0.094**<br>(0.037)  | -0.156**<br>(0.071)  |
| Region: North   | -0.334***<br>(0.054) | -0.404***<br>(0.052) | -0.167***<br>(0.035) | -0.229***<br>(0.067) |
| Constant        | 1.109***<br>(0.111)  | 0.980***<br>(0.106)  | 0.978***<br>(0.091)  | 1.074***<br>(0.099)  |
| R-squared       | 0.14                 | 0.11                 | 0.07                 | 0.11                 |
| Observations    | 7986                 | 3442                 | 12259                | 3759                 |
| Clusters        | 1223                 | 1407                 | 2459                 | 1105                 |

**Note:** The table reports the effect of a set of individual characteristics on the probability to vote for Socialists / Communists / Greens / Left bloc by decade. The original survey dataset is duplicated for each income bracket to approximate income deciles (see methodology). The number of clusters corresponds to the number of surveyed individuals in each decade. Robust standard errors clustered at the individual level.

**Table E17 - Determinants of support for PSOE / Podemos / IU / Other left in Spain**

|                                        | (1)                  | (2)                  | (3)                  | (4)                  |
|----------------------------------------|----------------------|----------------------|----------------------|----------------------|
|                                        | 1980-89              | 1990-99              | 2000-09              | 2010-20              |
| Education: None/Primary                | (baseline)<br>(.)    | (baseline)<br>(.)    | (baseline)<br>(.)    | (baseline)<br>(.)    |
| Education: Secondary                   | -0.101***<br>(0.013) | -0.081***<br>(0.017) | -0.045***<br>(0.011) | -0.065***<br>(0.011) |
| Education: University                  | -0.172***<br>(0.021) | -0.178***<br>(0.023) | -0.074***<br>(0.014) | -0.073***<br>(0.013) |
| Education: Postgraduate                | -0.375***<br>(0.144) | -0.297**<br>(0.134)  | -0.124***<br>(0.042) | -0.080**<br>(0.035)  |
| Income group: Bottom 50%               | (baseline)<br>(.)    |                      | (baseline)<br>(.)    | (baseline)<br>(.)    |
| Income group: Middle 40%               | -0.029<br>(0.018)    |                      | -0.055***<br>(0.010) | -0.034***<br>(0.009) |
| Income group: Top 10%                  | -0.144***<br>(0.032) |                      | -0.123***<br>(0.016) | -0.080***<br>(0.015) |
| Age: 20-39                             | (baseline)<br>(.)    | (baseline)<br>(.)    | (baseline)<br>(.)    | (baseline)<br>(.)    |
| Age: 40-59                             | -0.148***<br>(0.016) | -0.093***<br>(0.016) | 0.022**<br>(0.010)   | 0.034***<br>(0.010)  |
| Age: 60+                               | -0.169***<br>(0.018) | -0.121***<br>(0.019) | -0.038***<br>(0.013) | 0.027**<br>(0.012)   |
| Gender: Woman                          | (baseline)<br>(.)    | (baseline)<br>(.)    | (baseline)<br>(.)    | (baseline)<br>(.)    |
| Gender: Man                            | 0.045***<br>(0.014)  | 0.024*<br>(0.013)    | -0.067***<br>(0.008) | -0.048***<br>(0.007) |
| Religion: None                         | (baseline)<br>(.)    |                      | (baseline)<br>(.)    | (baseline)<br>(.)    |
| Religion: Catholic                     | -0.303***<br>(0.025) |                      | -0.220***<br>(0.012) | -0.280***<br>(0.011) |
| Religion: Other                        | 0.021<br>(0.084)     |                      | -0.047<br>(0.047)    | -0.009<br>(0.029)    |
| Religious practice: Never              | (baseline)<br>(.)    |                      | (baseline)<br>(.)    | (baseline)<br>(.)    |
| Religious practice: Less than monthly  | -0.139***<br>(0.024) |                      | -0.132***<br>(0.012) | -0.136***<br>(0.011) |
| Religious practice: Monthly or more    | -0.398***<br>(0.021) |                      | -0.259***<br>(0.011) | -0.267***<br>(0.010) |
| Location: Urban                        | (baseline)<br>(.)    | (baseline)<br>(.)    | (baseline)<br>(.)    | (baseline)<br>(.)    |
| Location: Rural                        | -0.093***<br>(0.018) | -0.096***<br>(0.028) | -0.036**<br>(0.015)  | -0.008<br>(0.014)    |
| Employment status: Employed            | (baseline)<br>(.)    | (baseline)<br>(.)    | (baseline)<br>(.)    | (baseline)<br>(.)    |
| Employment status: Unemployed/Inactive | 0.010<br>(0.015)     | 0.013<br>(0.014)     | 0.001<br>(0.010)     | 0.023**<br>(0.010)   |
| Marital status: Single                 | (baseline)<br>(.)    |                      | (baseline)<br>(.)    | (baseline)<br>(.)    |
| Marital status: Married/With partner   | 0.019<br>(0.018)     |                      | -0.008<br>(0.010)    | -0.007<br>(0.008)    |

|                            |            |            |            |            |
|----------------------------|------------|------------|------------|------------|
| Region: Andalucia          | (baseline) | (baseline) | (baseline) | (baseline) |
|                            | (.)        | (.)        | (.)        | (.)        |
| Region: Aragon             | -0.101***  | -0.185***  | -0.014     | -0.011     |
|                            | (0.032)    | (0.036)    | (0.024)    | (0.022)    |
| Region: Asturias           | -0.083**   | -0.092**   | (baseline) | 0.009      |
|                            | (0.034)    | (0.038)    | (0.026)    | (0.021)    |
| Region: Baleares           | -0.230***  | -0.239***  | -0.187***  | -0.043*    |
|                            | (0.041)    | (0.045)    | (0.028)    | (0.024)    |
| Region: Basque Country     | -0.107***  | -0.173***  | -0.185***  | 0.041*     |
|                            | (0.028)    | (0.033)    | (0.022)    | (0.021)    |
| Region: Canarias           | -0.203***  | -0.269***  | -0.251***  | -0.042**   |
|                            | (0.032)    | (0.035)    | (0.020)    | (0.020)    |
| Region: Cantabria          | -0.189***  | -0.076     | -0.060*    | 0.140***   |
|                            | (0.047)    | (0.059)    | (0.033)    | (0.030)    |
| Region: Castilla La Mancha | -0.233***  | -0.230***  | -0.079***  | -0.067***  |
|                            | (0.029)    | (0.031)    | (0.020)    | (0.019)    |
| Region: Castilla y Leon    | -0.239***  | -0.211***  | -0.107***  | -0.090***  |
|                            | (0.025)    | (0.027)    | (0.017)    | (0.018)    |
| Region: Catalonia          | -0.209***  | -0.147***  | -0.063***  | 0.017      |
|                            | (0.019)    | (0.020)    | (0.015)    | (0.015)    |
| Region: Extremadura        | -0.141***  | (baseline) | 0.014      | -0.010     |
|                            | (0.035)    | (0.038)    | (0.024)    | (0.020)    |
| Region: Galicia            | -0.249***  | -0.177***  | -0.035**   | (baseline) |
|                            | (0.020)    | (0.028)    | (0.017)    | (0.017)    |
| Region: Madrid             | -0.110***  | -0.154***  | -0.120***  | -0.081***  |
|                            | (0.020)    | (0.022)    | (0.016)    | (0.014)    |
| Region: Murcia             | -0.103***  | -0.237***  | -0.224***  | -0.091***  |
|                            | (0.037)    | (0.039)    | (0.023)    | (0.019)    |
| Region: Navarra            | 0.016      | -0.025     | 0.023      | 0.108***   |
|                            | (0.054)    | (0.054)    | (0.036)    | (0.030)    |
| Region: Rioja              | -0.171**   | -0.289***  | -0.138**   | -0.044     |
|                            | (0.070)    | (0.062)    | (0.057)    | (0.034)    |
| Region: Valencia           | -0.109***  | -0.203***  | -0.185***  | -0.022     |
|                            | (0.021)    | (0.023)    | (0.015)    | (0.014)    |
| Region: Ceuta              |            |            |            | -0.278***  |
|                            |            |            |            | (0.040)    |
| Region: Melilla            |            |            |            | -0.227***  |
|                            |            |            |            | (0.063)    |
| Constant                   | 1.447***   | 0.749***   | 0.982***   | 0.836***   |
|                            | (0.093)    | (0.024)    | (0.019)    | (0.019)    |
| R-squared                  | 0.13       | 0.05       | 0.13       | 0.14       |
| Observations               | 20532      | 11048      | 45305      | 74833      |
| Clusters                   | 4358       | 4925       | 6005       | 6216       |

**Note:** The table reports the effect of a set of individual characteristics on the probability to vote for PSOE / Podemos / IU / Other left by decade in Spain. The original survey dataset is duplicated for each income bracket to approximate income deciles (see methodology). The number of clusters corresponds to the number of surveyed individuals in each decade. Robust standard errors clustered at the individual level.

**Table E18 - Determinants of support for Social Democratic Party / Left Party / Green Party in Sweden**

|                                        | (1)        | (2)        | (3)        | (4)        | (5)        | (6)        | (7)        |
|----------------------------------------|------------|------------|------------|------------|------------|------------|------------|
|                                        | 1950-59    | 1960-69    | 1970-79    | 1980-89    | 1990-99    | 2000-09    | 2010-20    |
| Education: None/Primary                | (baseline) |
|                                        | (.)        | (.)        | (.)        | (.)        | (.)        | (.)        | (.)        |
| Education: Secondary                   | -0.312***  | -0.244***  | -0.218***  | -0.199***  | -0.163***  | -0.108***  | -0.036     |
|                                        | (0.025)    | (0.015)    | (0.013)    | (0.013)    | (0.016)    | (0.023)    | (0.033)    |
| Education: University                  | -0.513***  | -0.472***  | -0.302***  | -0.323***  | -0.255***  | -0.212***  | -0.029     |
|                                        | (0.034)    | (0.020)    | (0.017)    | (0.017)    | (0.018)    | (0.024)    | (0.037)    |
| Income group: Bottom 50%               | (baseline) |
|                                        | (.)        | (.)        | (.)        | (.)        | (.)        | (.)        | (.)        |
| Income group: Middle 40%               | 0.121***   | 0.051***   | 0.026**    | 0.050***   | 0.010      | -0.024**   | -0.085***  |
|                                        | (0.027)    | (0.013)    | (0.011)    | (0.011)    | (0.013)    | (0.012)    | (0.022)    |
| Income group: Top 10%                  | -0.048     | -0.052***  | -0.136***  | -0.053***  | -0.121***  | -0.189***  | -0.225***  |
|                                        | (0.039)    | (0.019)    | (0.017)    | (0.016)    | (0.021)    | (0.020)    | (0.029)    |
| Age: 20-39                             | (baseline) |
|                                        | (.)        | (.)        | (.)        | (.)        | (.)        | (.)        | (.)        |
| Age: 40-59                             | -0.071***  | -0.061***  | -0.024**   | -0.062***  | 0.017      | 0.050***   | -0.016     |
|                                        | (0.024)    | (0.014)    | (0.012)    | (0.014)    | (0.014)    | (0.017)    | (0.029)    |
| Age: 60+                               | -0.135***  | -0.079***  | -0.061***  | -0.086***  | -0.061***  | -0.096***  | -0.012     |
|                                        | (0.030)    | (0.017)    | (0.013)    | (0.016)    | (0.019)    | (0.022)    | (0.032)    |
| Gender: Woman                          | (baseline) |
|                                        | (.)        | (.)        | (.)        | (.)        | (.)        | (.)        | (.)        |
| Gender: Man                            | 0.027      | 0.018      | 0.021**    | -0.040***  | -0.036***  | -0.031**   | -0.030     |
|                                        | (0.021)    | (0.014)    | (0.010)    | (0.012)    | (0.012)    | (0.014)    | (0.023)    |
| Religious practice: Never              | (baseline) | (baseline) |            | (baseline) | (baseline) | (baseline) | (baseline) |
|                                        | (.)        | (.)        |            | (.)        | (.)        | (.)        | (.)        |
| Religious practice: Less than monthly  | -0.190***  | -0.270***  |            | -0.229***  | -0.193***  | -0.169***  | -0.113**   |
|                                        | (0.039)    | (0.017)    |            | (0.022)    | (0.021)    | (0.028)    | (0.047)    |
| Religious practice: Monthly or more    | 0.119***   | 0.128***   |            | 0.137***   | 0.106***   | 0.093***   | 0.046*     |
|                                        | (0.037)    | (0.019)    |            | (0.016)    | (0.013)    | (0.016)    | (0.027)    |
| Location: Urban                        | (baseline) |
|                                        | (.)        | (.)        | (.)        | (.)        | (.)        | (.)        | (.)        |
| Location: Rural                        | -0.097***  | -0.122***  | -0.214***  | -0.167***  | -0.133***  | -0.090***  | -0.072**   |
|                                        | (0.022)    | (0.013)    | (0.018)    | (0.015)    | (0.016)    | (0.020)    | (0.030)    |
| Employment status: Employed            |            |            |            | (baseline) | (baseline) | (baseline) | (baseline) |
|                                        |            |            |            | (.)        | (.)        | (.)        | (.)        |
| Employment status: Unemployed/Inactive |            |            |            | 0.024      | 0.030*     | 0.032      | 0.019      |
|                                        |            |            |            | (0.018)    | (0.016)    | (0.020)    | (0.028)    |
| Marital status: Single                 | (baseline) |
|                                        | (.)        | (.)        | (.)        | (.)        | (.)        | (.)        | (.)        |
| Marital status: Married/With partner   | 0.028      | 0.046***   | -0.004     | 0.017      | 0.019      | -0.019     | -0.001     |
|                                        | (0.024)    | (0.014)    | (0.011)    | (0.013)    | (0.014)    | (0.017)    | (0.029)    |
| Region: Gotland                        |            |            |            |            | (baseline) | (baseline) | (baseline) |
|                                        |            |            |            |            | (.)        | (.)        | (.)        |
| Region: Norrland                       |            |            |            |            | 0.139***   | 0.110***   | 0.186***   |
|                                        |            |            |            |            | (0.017)    | (0.021)    | (0.037)    |
| Region: Svealand                       |            |            |            |            | -0.002     | -0.011     | 0.032      |
|                                        |            |            |            |            | (0.013)    | (0.015)    | (0.024)    |
| Constant                               | 0.855***   | 0.688***   | 0.634***   | 0.718***   | 0.690***   | 0.663***   | 0.536***   |
|                                        | (0.147)    | (0.018)    | (0.015)    | (0.019)    | (0.023)    | (0.031)    | (0.046)    |
| R-squared                              | 0.16       | 0.15       | 0.06       | 0.09       | 0.09       | 0.07       | 0.05       |
| Observations                           | 4441       | 18082      | 24545      | 22345      | 15299      | 14440      | 9405       |
| Clusters                               | 1414       | 3234       | 4536       | 3745       | 3450       | 3370       | 2684       |

**Note:** The table reports the effect of a set of individual characteristics on the probability to vote for Social Democratic Party / Left Party / Green Party by decade in Sweden. The original survey dataset is duplicated for each income bracket to approximate income deciles (see methodology). The number of clusters corresponds to the number of surveyed individuals in each decade. Robust standard errors clustered at the individual level.

**Table E19 - Determinants of support for Social Democrats / Greens / Other left in Switzerland**

|                                        | (1)        | (2)        | (3)        | (4)        | (5)        | (6)        |
|----------------------------------------|------------|------------|------------|------------|------------|------------|
|                                        | 1960-69    | 1970-79    | 1980-89    | 1990-99    | 2000-09    | 2010-20    |
| Education: None/Primary                | (baseline) | (baseline) | (baseline) | (baseline) | (baseline) | (baseline) |
|                                        | (.)        | (.)        | (.)        | (.)        | (.)        | (.)        |
| Education: Secondary                   | -0.053     | -0.059**   | 0.045      | (baseline) | 0.032      | 0.036*     |
|                                        | (0.068)    | (0.024)    | (0.043)    | (0.026)    | (0.021)    | (0.020)    |
| Education: University                  | -0.217***  | -0.069     | -0.033     | 0.062*     | 0.147***   | 0.193***   |
|                                        | (0.065)    | (0.043)    | (0.070)    | (0.037)    | (0.029)    | (0.023)    |
| Income group: Bottom 50%               |            | (baseline) |            | (baseline) | (baseline) | (baseline) |
|                                        |            | (.)        |            | (.)        | (.)        | (.)        |
| Income group: Middle 40%               |            | -0.022     |            | 0.018      | 0.003      | 0.012      |
|                                        |            | (0.031)    |            | (0.017)    | (0.016)    | (0.011)    |
| Income group: Top 10%                  |            | -0.114***  |            | -0.050*    | -0.111***  | -0.049***  |
|                                        |            | (0.044)    |            | (0.026)    | (0.023)    | (0.017)    |
| Age: 20-39                             | (baseline) | (baseline) | (baseline) | (baseline) | (baseline) | (baseline) |
|                                        | (.)        | (.)        | (.)        | (.)        | (.)        | (.)        |
| Age: 40-59                             | 0.020      | 0.024      | -0.105**   | -0.051**   | 0.007      | -0.006     |
|                                        | (0.055)    | (0.023)    | (0.046)    | (0.021)    | (0.019)    | (0.015)    |
| Age: 60+                               | -0.042     | -0.024     | -0.122**   | -0.117***  | -0.082***  | -0.056***  |
|                                        | (0.070)    | (0.028)    | (0.054)    | (0.026)    | (0.021)    | (0.016)    |
| Gender: Woman                          |            | (baseline) | (baseline) | (baseline) | (baseline) | (baseline) |
|                                        |            | (.)        | (.)        | (.)        | (.)        | (.)        |
| Gender: Man                            |            | 0.017      | -0.007     | -0.054***  | -0.066***  | -0.082***  |
|                                        |            | (0.025)    | (0.040)    | (0.018)    | (0.014)    | (0.011)    |
| Religion: None                         | (baseline) | (baseline) | (baseline) | (baseline) | (baseline) | (baseline) |
|                                        | (.)        | (.)        | (.)        | (.)        | (.)        | (.)        |
| Religion: Catholic                     | -0.383***  | -0.203***  | -0.376***  | -0.136***  | -0.136***  | -0.090***  |
|                                        | (0.139)    | (0.077)    | (0.079)    | (0.048)    | (0.034)    | (0.028)    |
| Religion: Other Christian              | -0.255*    | -0.123     | -0.245***  | -0.047     | -0.060*    | -0.050*    |
|                                        | (0.132)    | (0.075)    | (0.080)    | (0.047)    | (0.034)    | (0.028)    |
| Religion: Other                        | -0.149     | -0.044     | -0.114     | -0.019     | -0.084**   | -0.107***  |
|                                        | (0.328)    | (0.136)    | (0.148)    | (0.068)    | (0.042)    | (0.036)    |
| Religious practice: Never              | (baseline) | (baseline) |            | (baseline) | (baseline) | (baseline) |
|                                        | (.)        | (.)        |            | (.)        | (.)        | (.)        |
| Religious practice: Less than monthly  | -0.137*    | -0.081**   |            | -0.100***  | -0.073**   | -0.093***  |
|                                        | (0.078)    | (0.036)    |            | (0.035)    | (0.029)    | (0.026)    |
| Religious practice: Monthly or more    | -0.312***  | -0.270***  |            | -0.221***  | -0.183***  | -0.218***  |
|                                        | (0.087)    | (0.039)    |            | (0.038)    | (0.032)    | (0.028)    |
| Location: Urban                        | (baseline) | (baseline) |            | (baseline) | (baseline) | (baseline) |
|                                        | (.)        | (.)        |            | (.)        | (.)        | (.)        |
| Location: Rural                        | -0.162***  | -0.120***  |            | -0.080***  | -0.118***  | -0.118***  |
|                                        | (0.050)    | (0.025)    |            | (0.016)    | (0.014)    | (0.011)    |
| Employment status: Employed            | (baseline) | (baseline) | (baseline) | (baseline) | (baseline) | (baseline) |
|                                        | (.)        | (.)        | (.)        | (.)        | (.)        | (.)        |
| Employment status: Unemployed/Inactive | 0.028      | -0.015     | 0.094**    | -0.000     | -0.042**   | 0.001      |
|                                        | (0.081)    | (0.027)    | (0.048)    | (0.023)    | (0.018)    | (0.014)    |
| Marital status: Single                 | (baseline) | (baseline) | (baseline) | (baseline) | (baseline) | (baseline) |
|                                        | (.)        | (.)        | (.)        | (.)        | (.)        | (.)        |
| Marital status: Married/With partner   | -0.053     | -0.016     | -0.045     | -0.049***  | -0.018     | -0.061***  |
|                                        | (0.056)    | (0.025)    | (0.043)    | (0.019)    | (0.014)    | (0.012)    |

|                 |            |            |            |            |            |            |
|-----------------|------------|------------|------------|------------|------------|------------|
| Region: French  | (baseline) | (baseline) | (baseline) | (baseline) | (baseline) | (baseline) |
|                 | (.)        | (.)        | (.)        | (.)        | (.)        | (.)        |
| Region: German  | -0.017     | -0.016     | -0.148***  | -0.041*    | -0.049***  | -0.054***  |
|                 | (0.060)    | (0.029)    | (0.055)    | (0.021)    | (0.017)    | (0.014)    |
| Region: Italian | -0.087     | -0.019     | -0.299***  | -0.123***  | -0.039*    | -0.111***  |
|                 | (0.105)    | (0.063)    | (0.070)    | (0.030)    | (0.023)    | (0.017)    |
| Constant        | 1.038***   | 0.831***   | 0.779***   | 0.675***   | 0.641***   | 0.644***   |
|                 | (0.123)    | (0.084)    | (0.099)    | (0.046)    | (0.033)    | (0.028)    |
| R-squared       | 0.17       | 0.10       | 0.11       | 0.07       | 0.10       | 0.11       |
| Observations    | 456        | 3294       | 900        | 11775      | 11681      | 18865      |
| Clusters        | 456        | 2182       | 582        | 6599       | 6567       | 11127      |

**Note:** The table reports the effect of a set of individual characteristics on the probability to vote for Social Democrats / Greens / Other left by decade in Switzerland. The original survey dataset is duplicated for each income bracket to approximate income deciles (see methodology). The number of clusters corresponds to the number of surveyed individuals in each decade. Robust standard errors clustered at the individual level.

**Table E20 - Determinants of support for the Labour Party in the United Kingdom**

|                                        | (1)        | (2)        | (3)        | (4)        | (5)        | (6)        | (7)        |
|----------------------------------------|------------|------------|------------|------------|------------|------------|------------|
|                                        | 1950-59    | 1960-69    | 1970-79    | 1980-89    | 1990-99    | 2000-09    | 2010-20    |
| Education: None/Primary                | (baseline) |
|                                        | (.)        | (.)        | (.)        | (.)        | (.)        | (.)        | (.)        |
| Education: Secondary                   | -0.214***  | -0.190***  | -0.177***  | -0.130***  | -0.129***  | -0.072***  | -0.022*    |
|                                        | (0.025)    | (0.021)    | (0.009)    | (0.009)    | (0.011)    | (0.013)    | (0.013)    |
| Education: University                  | -0.213***  | -0.212***  | -0.207***  | -0.114***  | -0.090***  | -0.131***  | -0.034**   |
|                                        | (0.065)    | (0.053)    | (0.015)    | (0.013)    | (0.016)    | (0.018)    | (0.017)    |
| Education: Postgraduate                |            |            |            |            | 0.033      | -0.057**   | 0.010      |
|                                        |            |            |            |            | (0.050)    | (0.026)    | (0.021)    |
| Income group: Bottom 50%               | (baseline) |
|                                        | (.)        | (.)        | (.)        | (.)        | (.)        | (.)        | (.)        |
| Income group: Middle 40%               | -0.165***  | -0.084***  | -0.039***  | -0.167***  | -0.142***  | -0.078***  | -0.047***  |
|                                        | (0.022)    | (0.019)    | (0.010)    | (0.011)    | (0.012)    | (0.014)    | (0.014)    |
| Income group: Top 10%                  | -0.346***  | -0.371***  | -0.180***  | -0.259***  | -0.222***  | -0.131***  | -0.106***  |
|                                        | (0.030)    | (0.023)    | (0.014)    | (0.014)    | (0.018)    | (0.020)    | (0.021)    |
| Age: 20-39                             | (baseline) |
|                                        | (.)        | (.)        | (.)        | (.)        | (.)        | (.)        | (.)        |
| Age: 40-59                             | -0.039*    | -0.048***  | -0.012     | -0.046***  | -0.034***  | -0.062***  | -0.052***  |
|                                        | (0.023)    | (0.018)    | (0.009)    | (0.009)    | (0.012)    | (0.015)    | (0.016)    |
| Age: 60+                               | -0.165***  | -0.089***  | -0.067***  | -0.075***  | -0.060***  | -0.100***  | -0.132***  |
|                                        | (0.028)    | (0.022)    | (0.010)    | (0.012)    | (0.014)    | (0.017)    | (0.019)    |
| Gender: Woman                          | (baseline) |
|                                        | (.)        | (.)        | (.)        | (.)        | (.)        | (.)        | (.)        |
| Gender: Man                            | 0.102***   | 0.053***   | 0.026***   | 0.033***   | 0.021**    | 0.004      | -0.020*    |
|                                        | (0.024)    | (0.020)    | (0.009)    | (0.008)    | (0.010)    | (0.011)    | (0.011)    |
| Religion: None                         | (baseline) |
|                                        | (.)        | (.)        | (.)        | (.)        | (.)        | (.)        | (.)        |
| Religion: Catholic                     | -0.131*    | 0.068      | 0.074***   | 0.096***   | 0.095***   | 0.110***   | 0.084***   |
|                                        | (0.070)    | (0.055)    | (0.017)    | (0.016)    | (0.018)    | (0.021)    | (0.022)    |
| Religion: Other Christian              | -0.241***  | -0.131***  | -0.093***  | -0.093***  | -0.091***  | -0.056***  | -0.068***  |
|                                        | (0.060)    | (0.048)    | (0.010)    | (0.009)    | (0.011)    | (0.013)    | (0.012)    |
| Religion: Other                        | -0.290**   | -0.134     | 0.096***   | -0.090**   | -0.069*    | -0.093***  | -0.026     |
|                                        | (0.116)    | (0.084)    | (0.036)    | (0.041)    | (0.036)    | (0.026)    | (0.044)    |
| Religion: Muslim                       |            |            |            | 0.043      | -0.028     | -0.058     | 0.220***   |
|                                        |            |            |            | (0.062)    | (0.076)    | (0.074)    | (0.050)    |
| Employment status: Employed            | (baseline) |
|                                        | (.)        | (.)        | (.)        | (.)        | (.)        | (.)        | (.)        |
| Employment status: Unemployed/Inactive | 0.007      | 0.037*     | 0.024**    | 0.002      | -0.019     | -0.012     | 0.023      |
|                                        | (0.026)    | (0.022)    | (0.010)    | (0.010)    | (0.012)    | (0.012)    | (0.015)    |
| Marital status: Single                 | (baseline) |
|                                        | (.)        | (.)        | (.)        | (.)        | (.)        | (.)        | (.)        |
| Marital status: Married/With partner   | 0.072***   | 0.059***   | 0.029***   | -0.004     | 0.013      | 0.004      | -0.046***  |
|                                        | (0.025)    | (0.020)    | (0.010)    | (0.010)    | (0.011)    | (0.012)    | (0.012)    |
| Race/ethnicity: African / Caribbean    |            |            | (baseline) | (baseline) | (baseline) | (baseline) | (baseline) |
|                                        |            |            | (.)        | (.)        | (.)        | (.)        | (.)        |
| Race/ethnicity: Indian / Pak. / Bang.  |            |            | 0.101      | 0.141***   | -0.077     | -0.028     | -0.146**   |
|                                        |            |            | (0.134)    | (0.054)    | (0.064)    | (0.082)    | (0.061)    |
| Race/ethnicity: Other                  |            |            | -0.310     | -0.408***  | -0.176**   | -0.260***  | -0.295***  |
|                                        |            |            | (0.231)    | (0.069)    | (0.076)    | (0.074)    | (0.060)    |
| Race/ethnicity: White                  |            |            | -0.326***  | -0.242***  | -0.329***  | -0.337***  | -0.371***  |
|                                        |            |            | (0.081)    | (0.039)    | (0.036)    | (0.055)    | (0.043)    |
| Constant                               | 0.782***   | 0.647***   | 0.888***   | 0.751***   | 0.893***   | 0.886***   | 0.840***   |
|                                        | (0.067)    | (0.053)    | (0.082)    | (0.040)    | (0.038)    | (0.057)    | (0.046)    |
| R-squared                              | 0.12       | 0.10       | 0.06       | 0.09       | 0.08       | 0.05       | 0.09       |
| Observations                           | 5122       | 6732       | 26522      | 18740      | 17793      | 14053      | 15439      |
| Clusters                               | 2025       | 2377       | 8082       | 7409       | 6770       | 5957       | 5760       |

**Note:** The table reports the effect of a set of individual characteristics on the probability to vote for the Labour Party by decade in Britain. The original survey dataset is duplicated for each income bracket to approximate income deciles (see methodology). The number of clusters corresponds to the number of surveyed individuals in each decade. Robust standard errors clustered at the individual level.





|                   |                      |                      |                     |                     |                     |                      |                      |
|-------------------|----------------------|----------------------|---------------------|---------------------|---------------------|----------------------|----------------------|
| Region: Northeast | -0.111***<br>(0.024) | -0.073***<br>(0.024) | -0.016<br>(0.025)   | -0.043*<br>(0.024)  | 0.040<br>(0.032)    | -0.022<br>(0.032)    | -0.015<br>(0.023)    |
| Region: South     | 0.129***<br>(0.029)  | 0.036<br>(0.027)     | -0.046**<br>(0.023) | -0.021<br>(0.020)   | -0.009<br>(0.026)   | -0.094***<br>(0.024) | -0.079***<br>(0.018) |
| Region: West      | 0.001<br>(0.033)     | 0.009<br>(0.029)     | -0.040<br>(0.027)   | 0.017<br>(0.023)    | 0.001<br>(0.031)    | 0.031<br>(0.029)     | 0.003<br>(0.021)     |
| Constant          | 0.997***<br>(0.077)  | 1.415***<br>(0.064)  | 1.244***<br>(0.046) | 1.211***<br>(0.044) | 1.407***<br>(0.053) | 1.375***<br>(0.055)  | 1.131***<br>(0.038)  |
| R-squared         | 0.12                 | 0.19                 | 0.15                | 0.18                | 0.21                | 0.21                 | 0.20                 |
| Observations      | 6532                 | 5513                 | 4498                | 4892                | 3491                | 5301                 | 19023                |
| Clusters          | 1718                 | 1486                 | 2138                | 1986                | 1821                | 2043                 | 7765                 |

**Note:** The table reports the effect of a set of individual characteristics on the probability to vote for the Democratic Party by decade in the United States. The original survey dataset is duplicated for each income bracket to approximate income deciles (see methodology). The number of clusters corresponds to the number of surveyed individuals in each decade. Robust standard errors clustered at the individual level.

**Figure EA1 - Vote for Labor / Greens by education level in Australia**

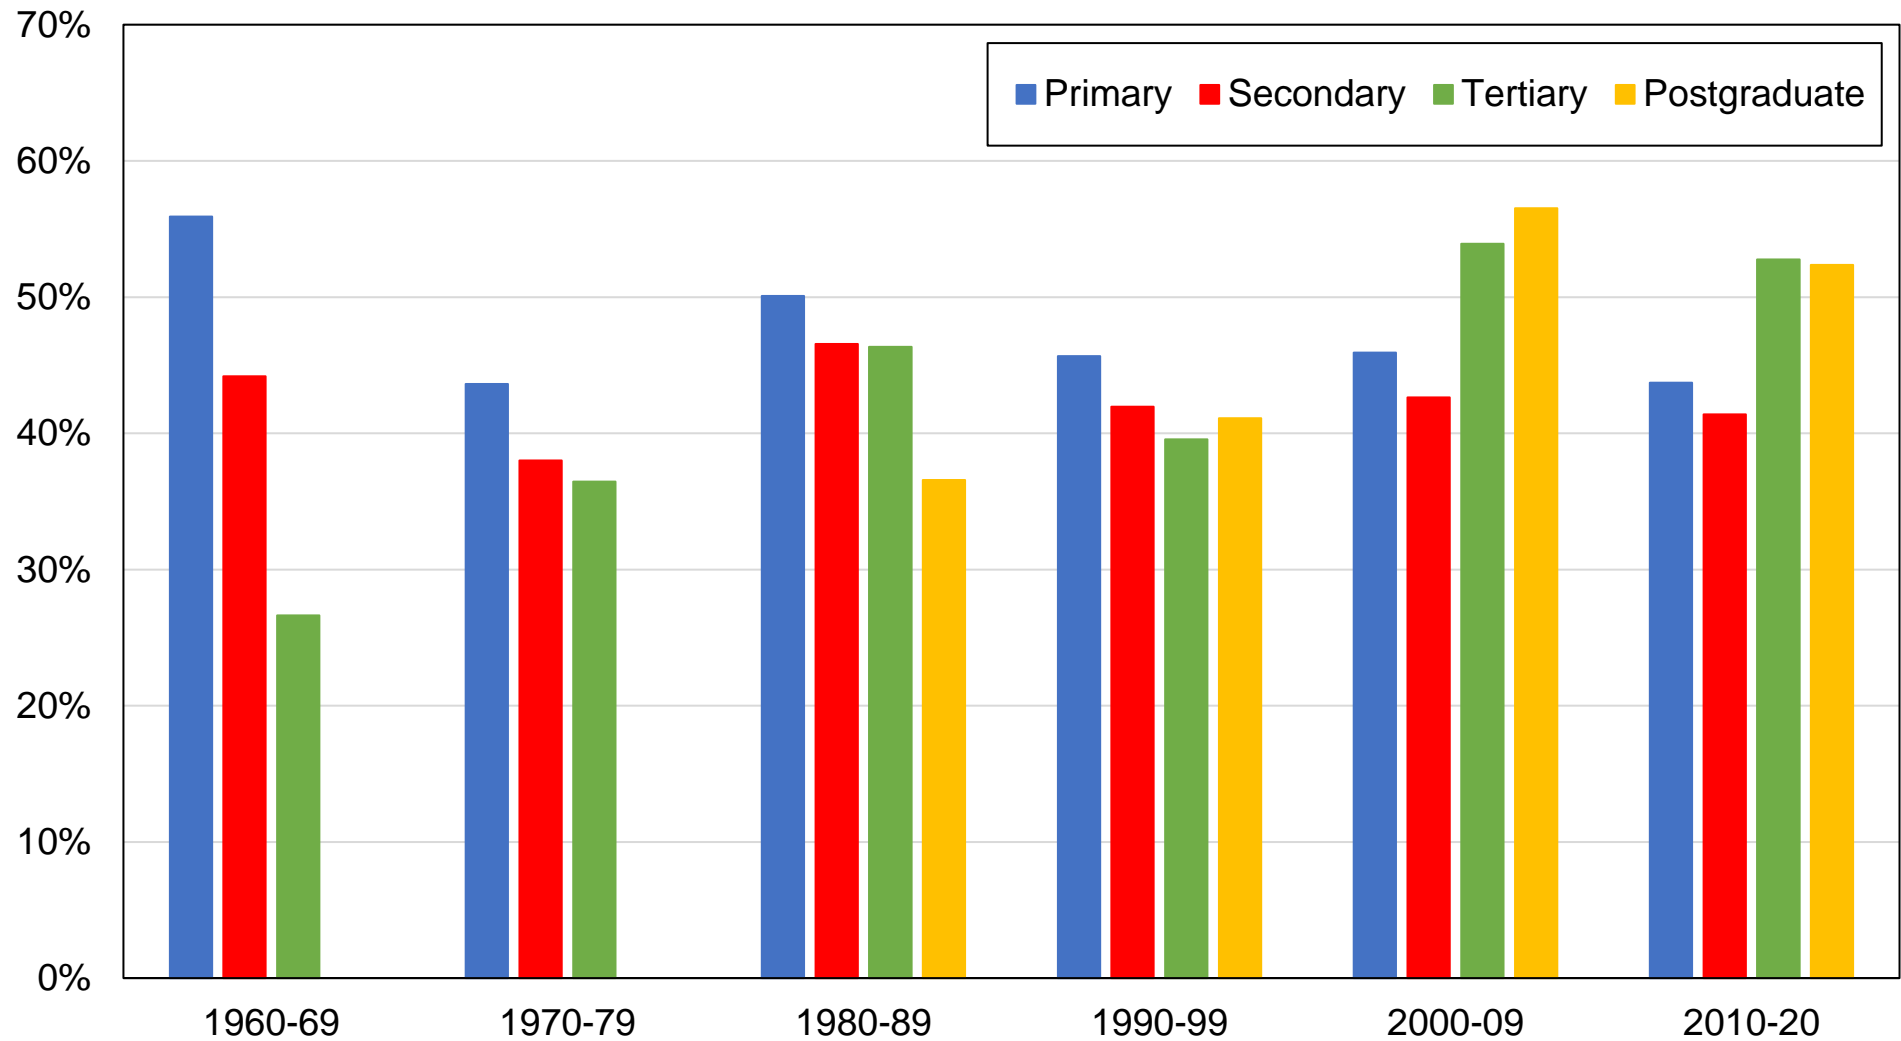

**Source:** authors' computations using Australian political attitudes surveys.

**Note:** the figure shows the share of votes received by Labor / Greens by education level.

**Figure EA2 - Vote for SPÖ / KPÖ / Greens / NEOS by education level in Austria**

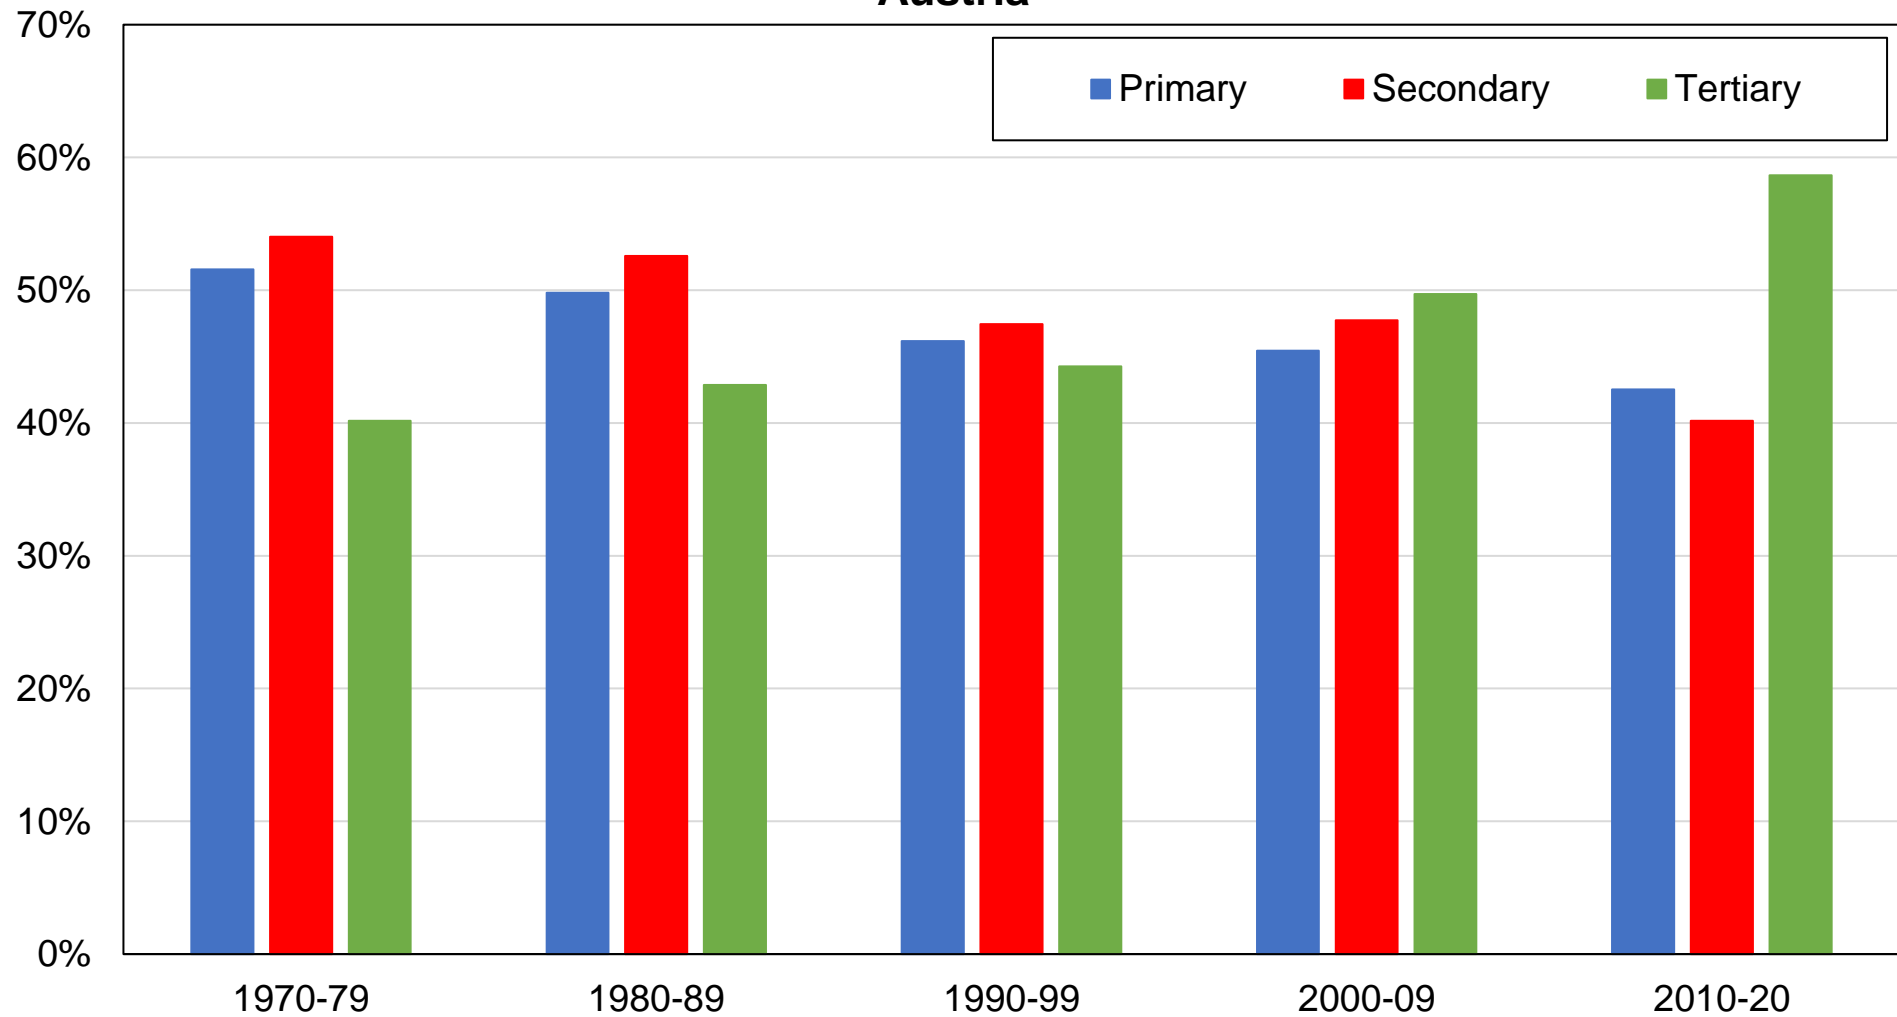

**Source:** authors' computations using Austrian political attitudes surveys.

**Note:** the figure shows the share of votes received by SPÖ / KPÖ / Greens / NEOS by education level.

**Figure EA3 - Vote for Socialists / Greens by education level in Belgium**

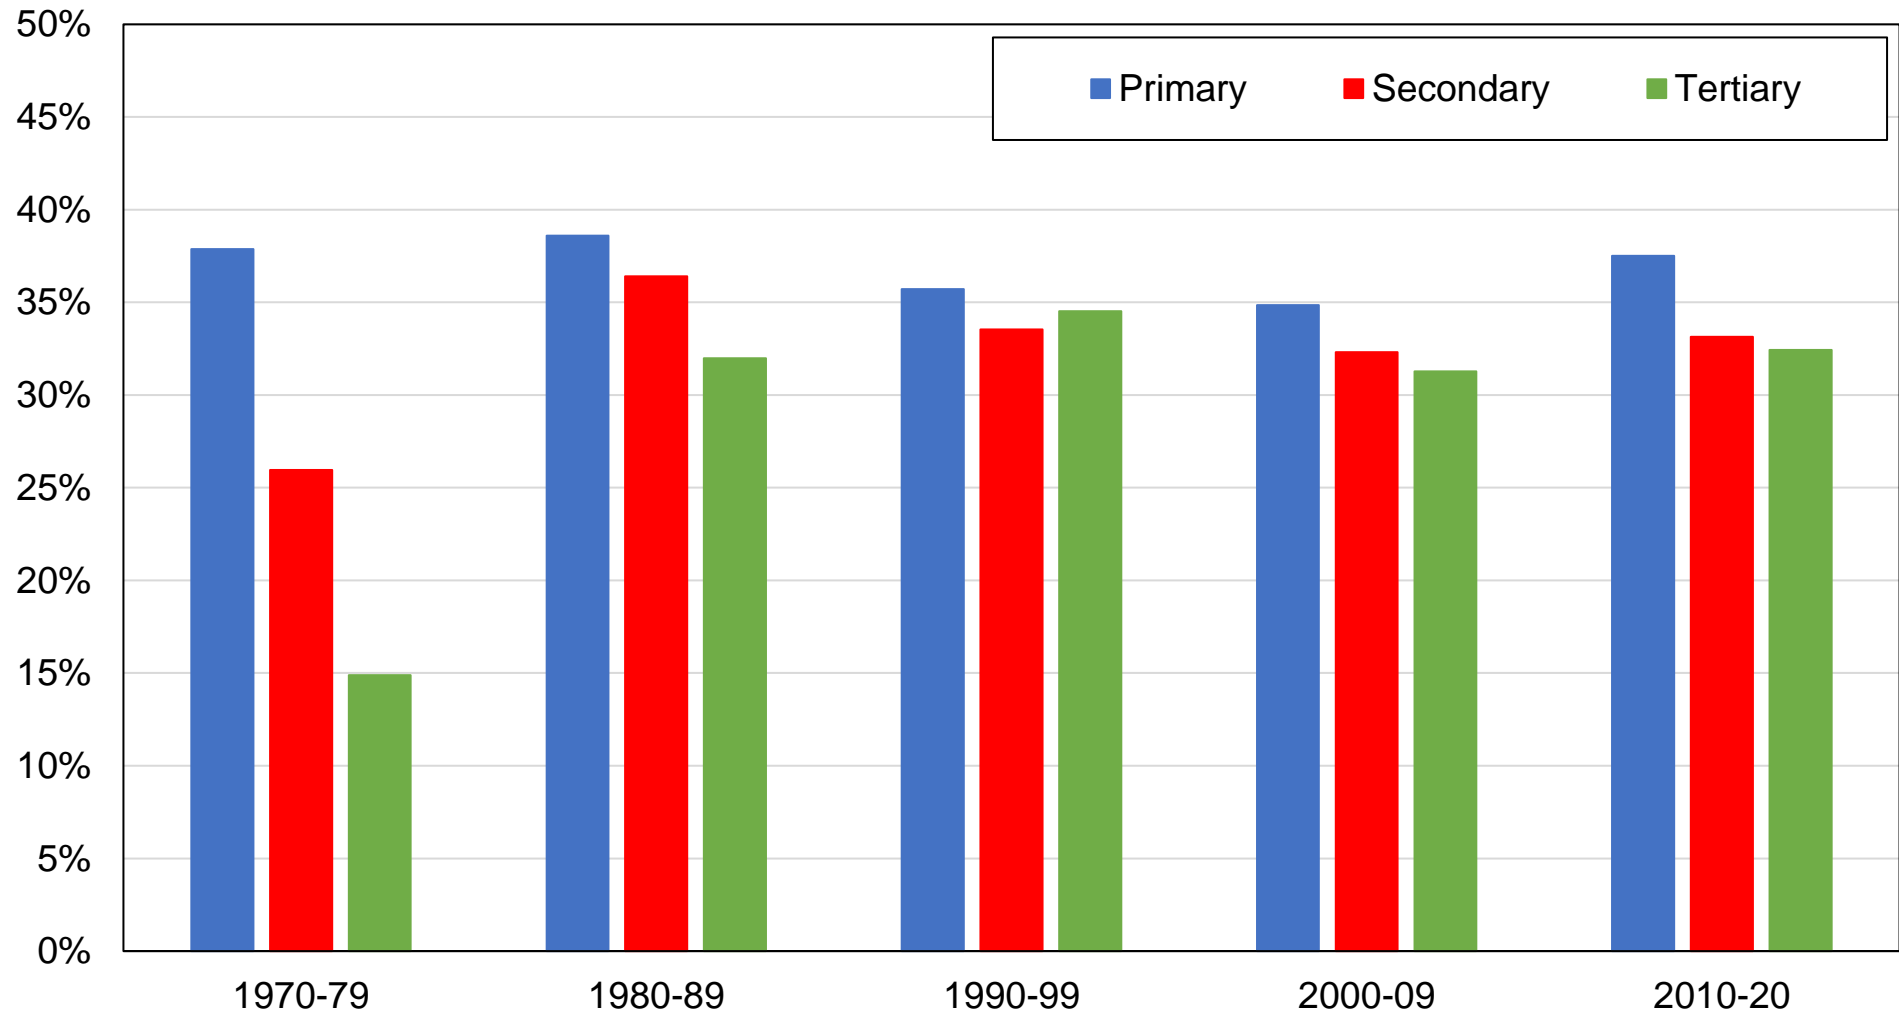

**Source:** authors' computations using Belgian political attitudes surveys.

**Note:** the figure shows the share of votes received by socialist and green parties by education level.

**Figure EA4 - Vote for Liberal / NDP / Green by education level in Canada**

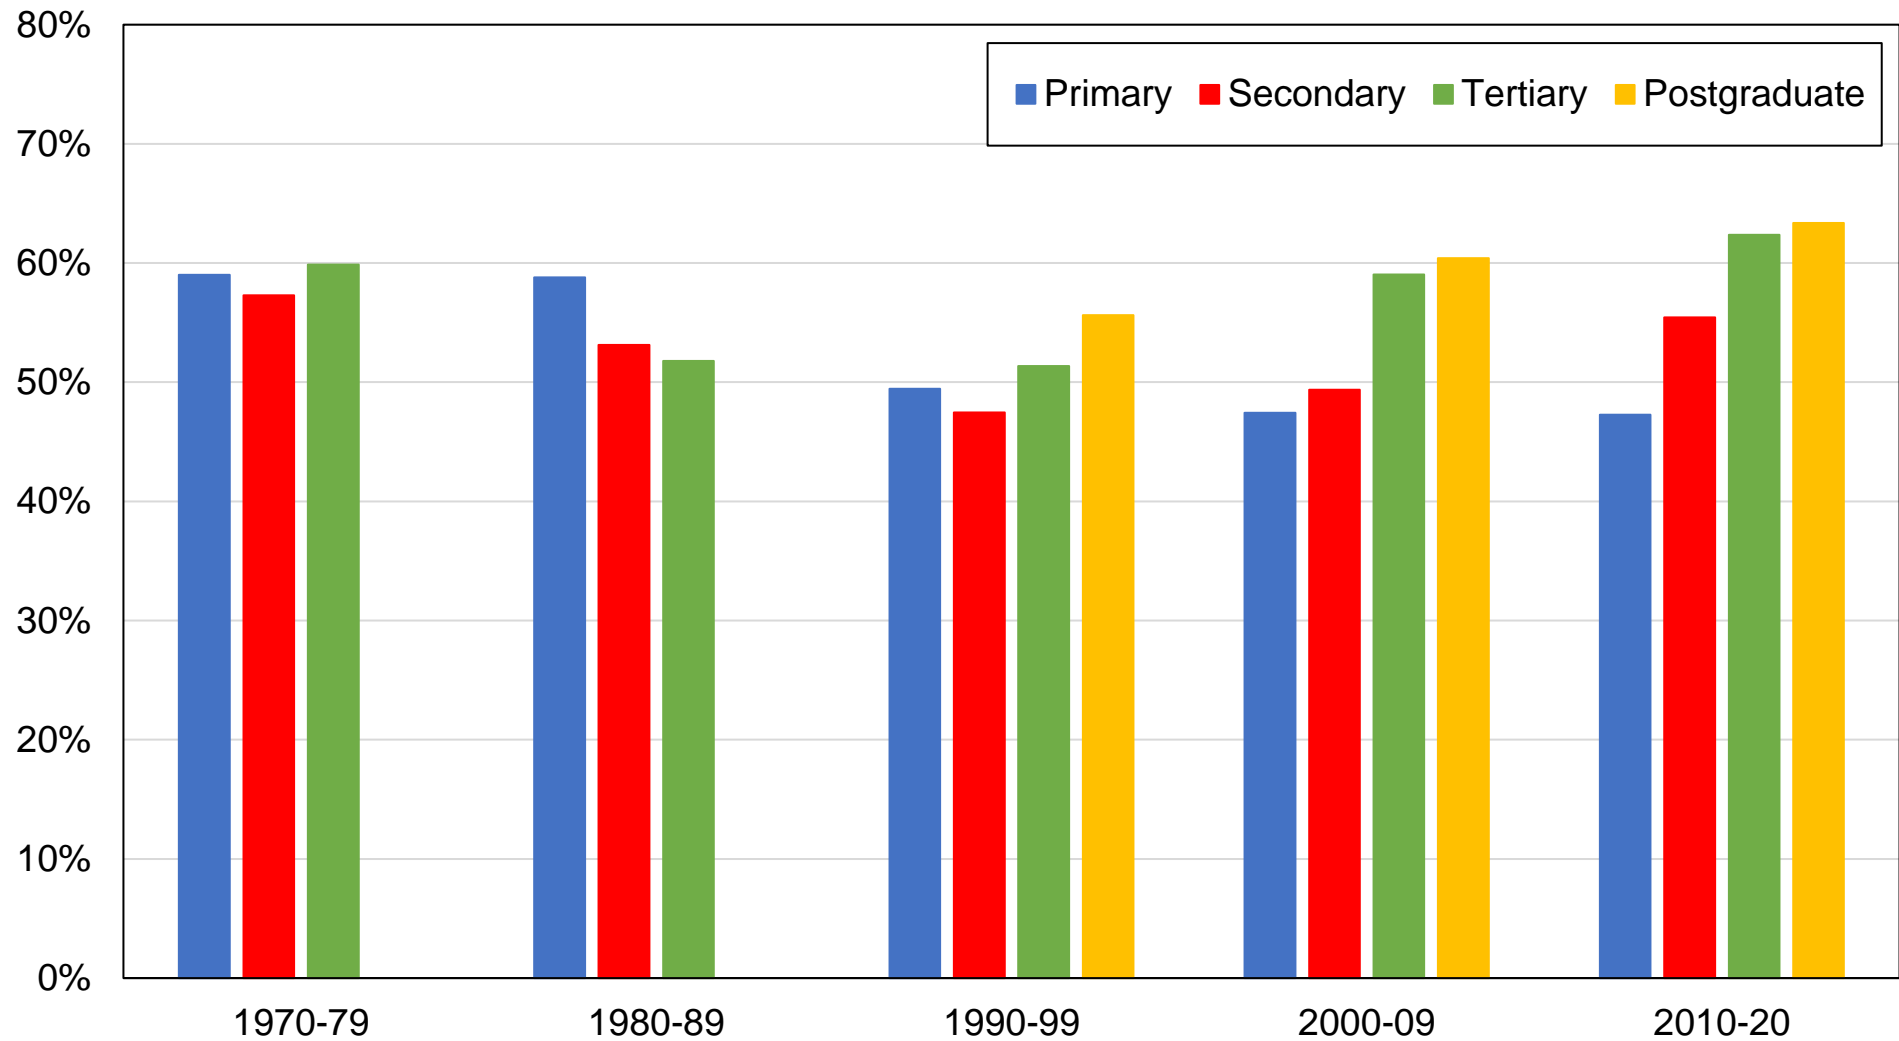

**Source:** authors' computations using Canadian election studies.

**Note:** the figure shows the share of votes received by the Liberal / NDP / Green parties by education level.

**Figure EA5 - Vote for Social Democratic Party / Socialist People's Party / Social Liberal Party / Red-Green Alliance by education level in Denmark**

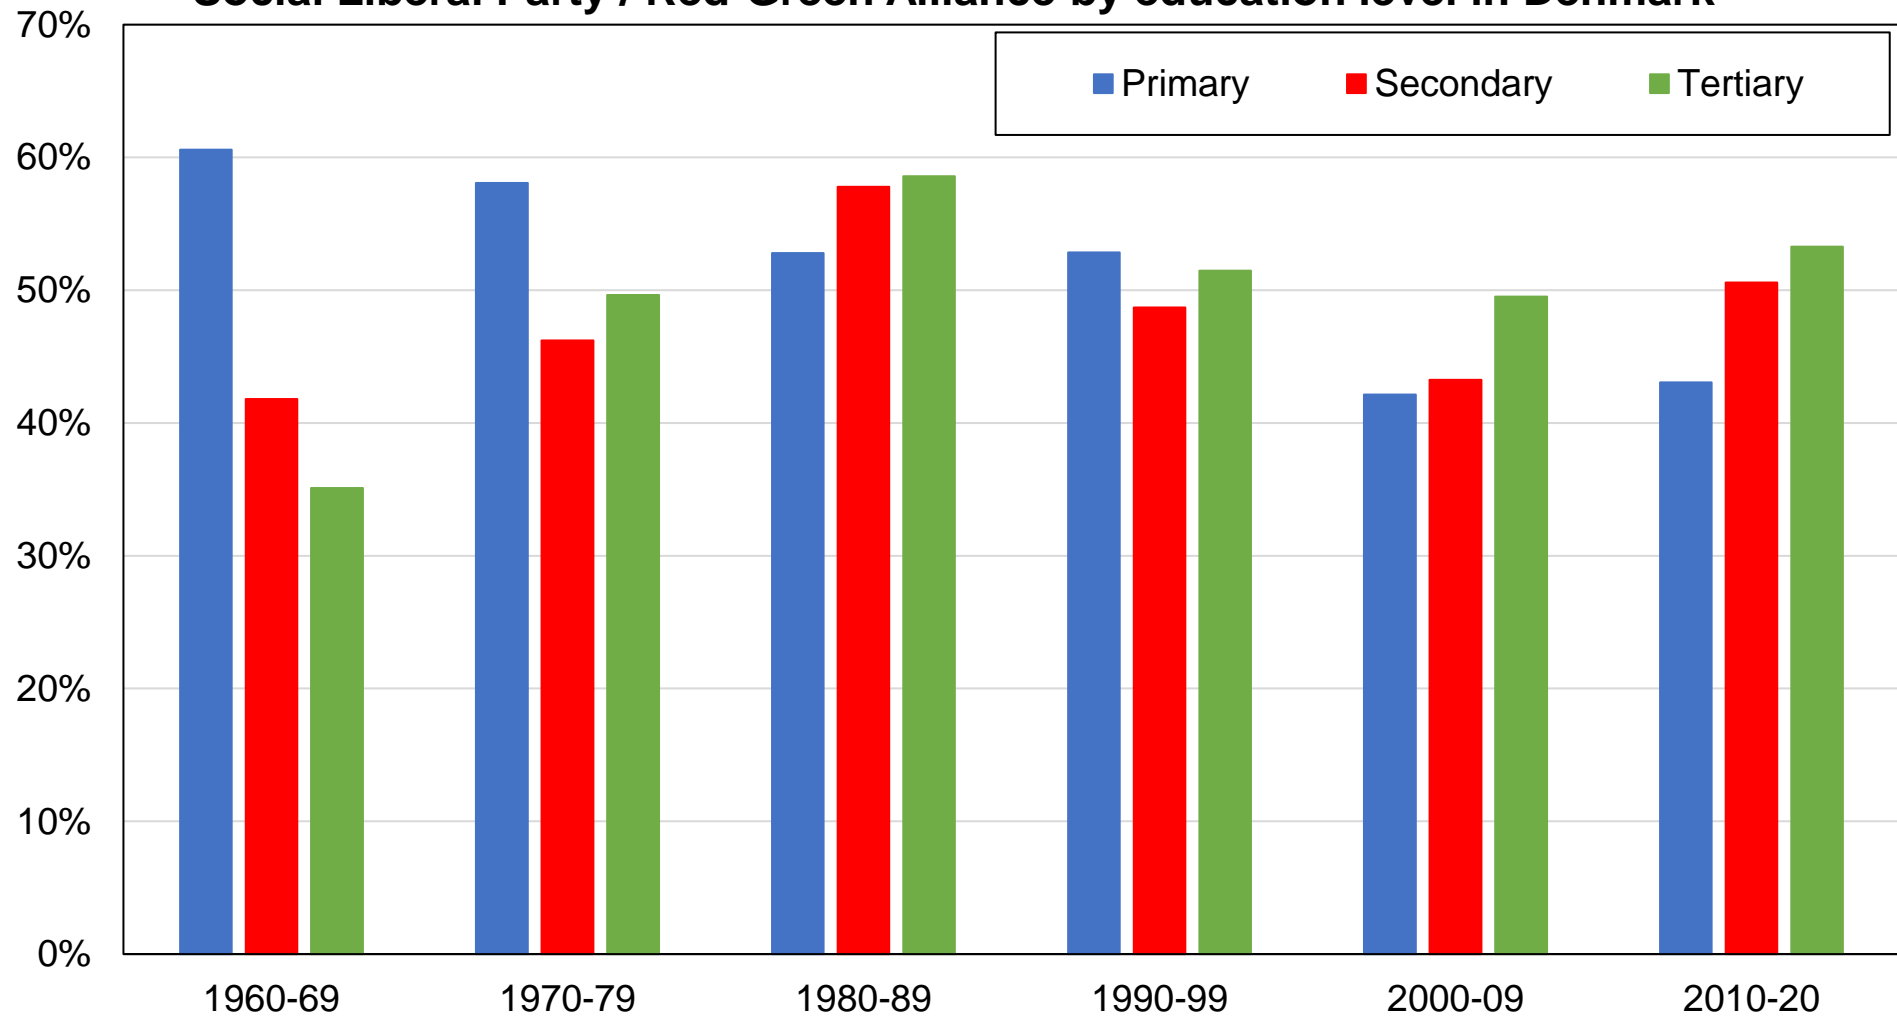

**Source:** authors' computations using Danish post-electoral surveys.

**Note:** the figure shows the share of votes received by Social Democratic Party / Socialist People's Party / Social Liberal Party / Red-Green Alliance by education level.

**Figure EA6 - Vote for Social Democratic Party / Finnish People's Democratic League / Left Alliance / Green League by education level in Finland**

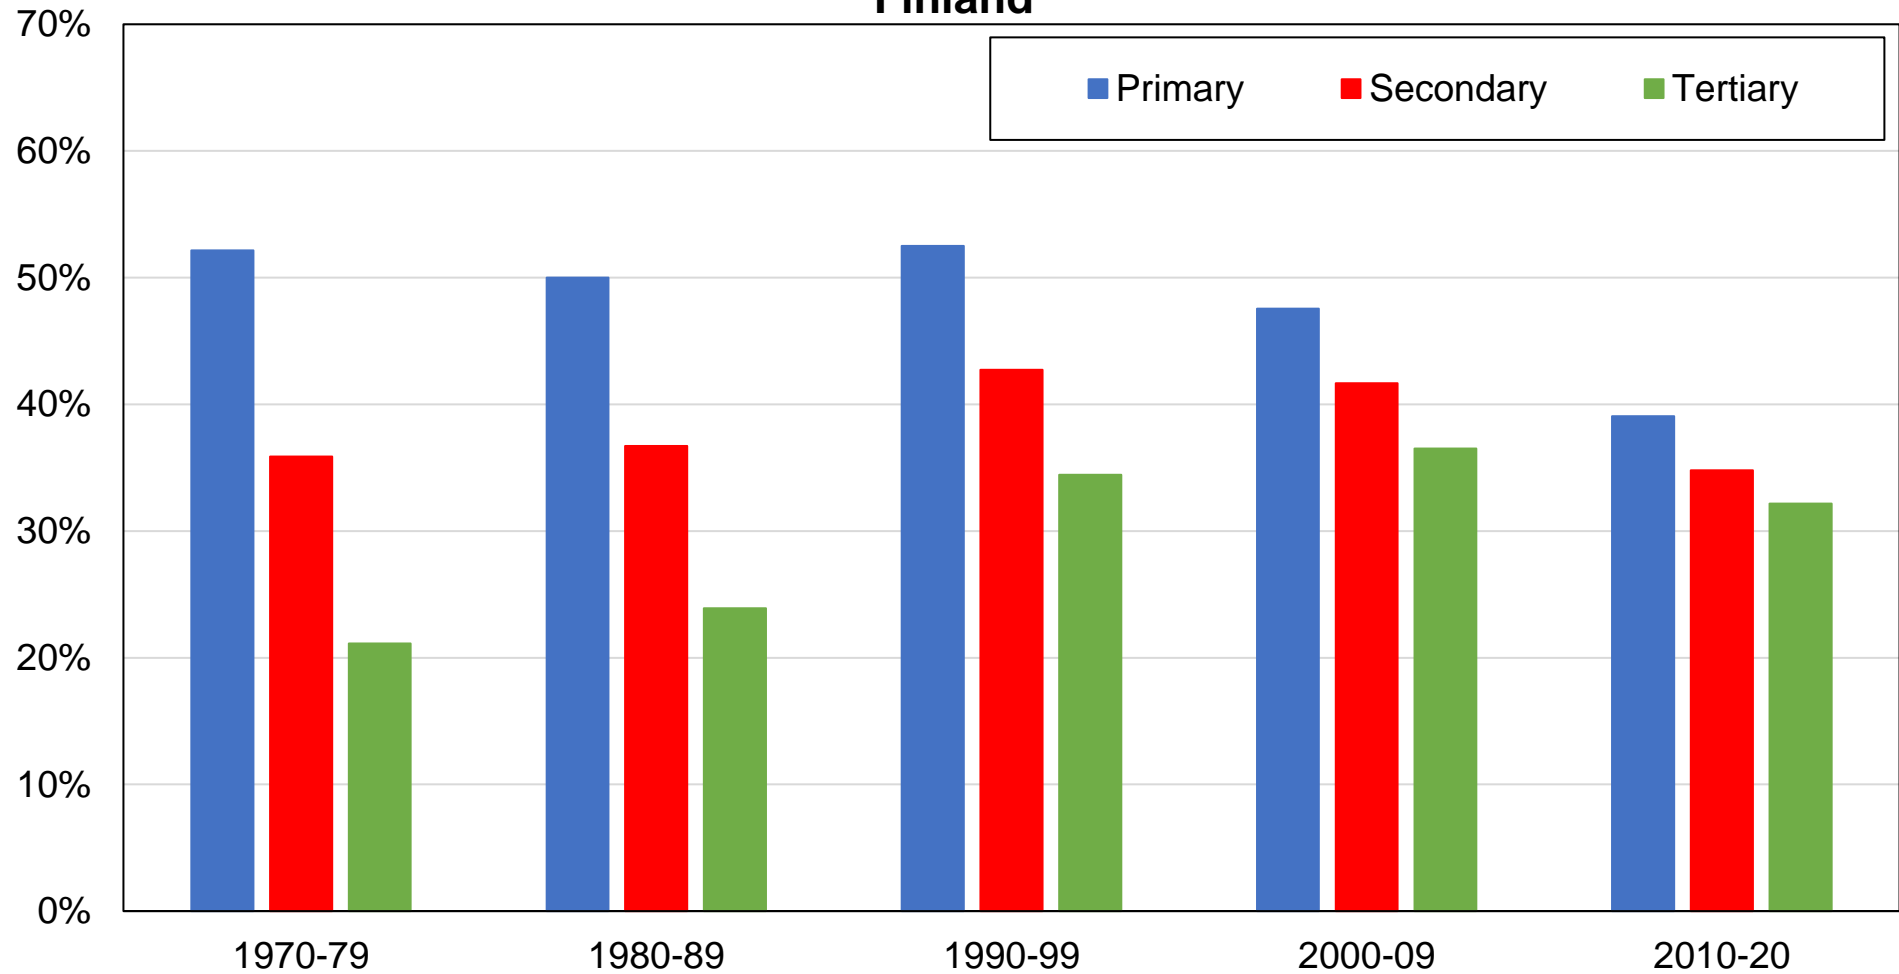

**Source:** authors' computations using Finnish electoral surveys.

**Note:** the figure shows the share of votes received by Social Democratic Party / Finnish People's Democratic League / Left Alliance / Green League by education level.



**Figure EA7 - Vote for PS / PCF / Radicaux / Other left by education level in France**

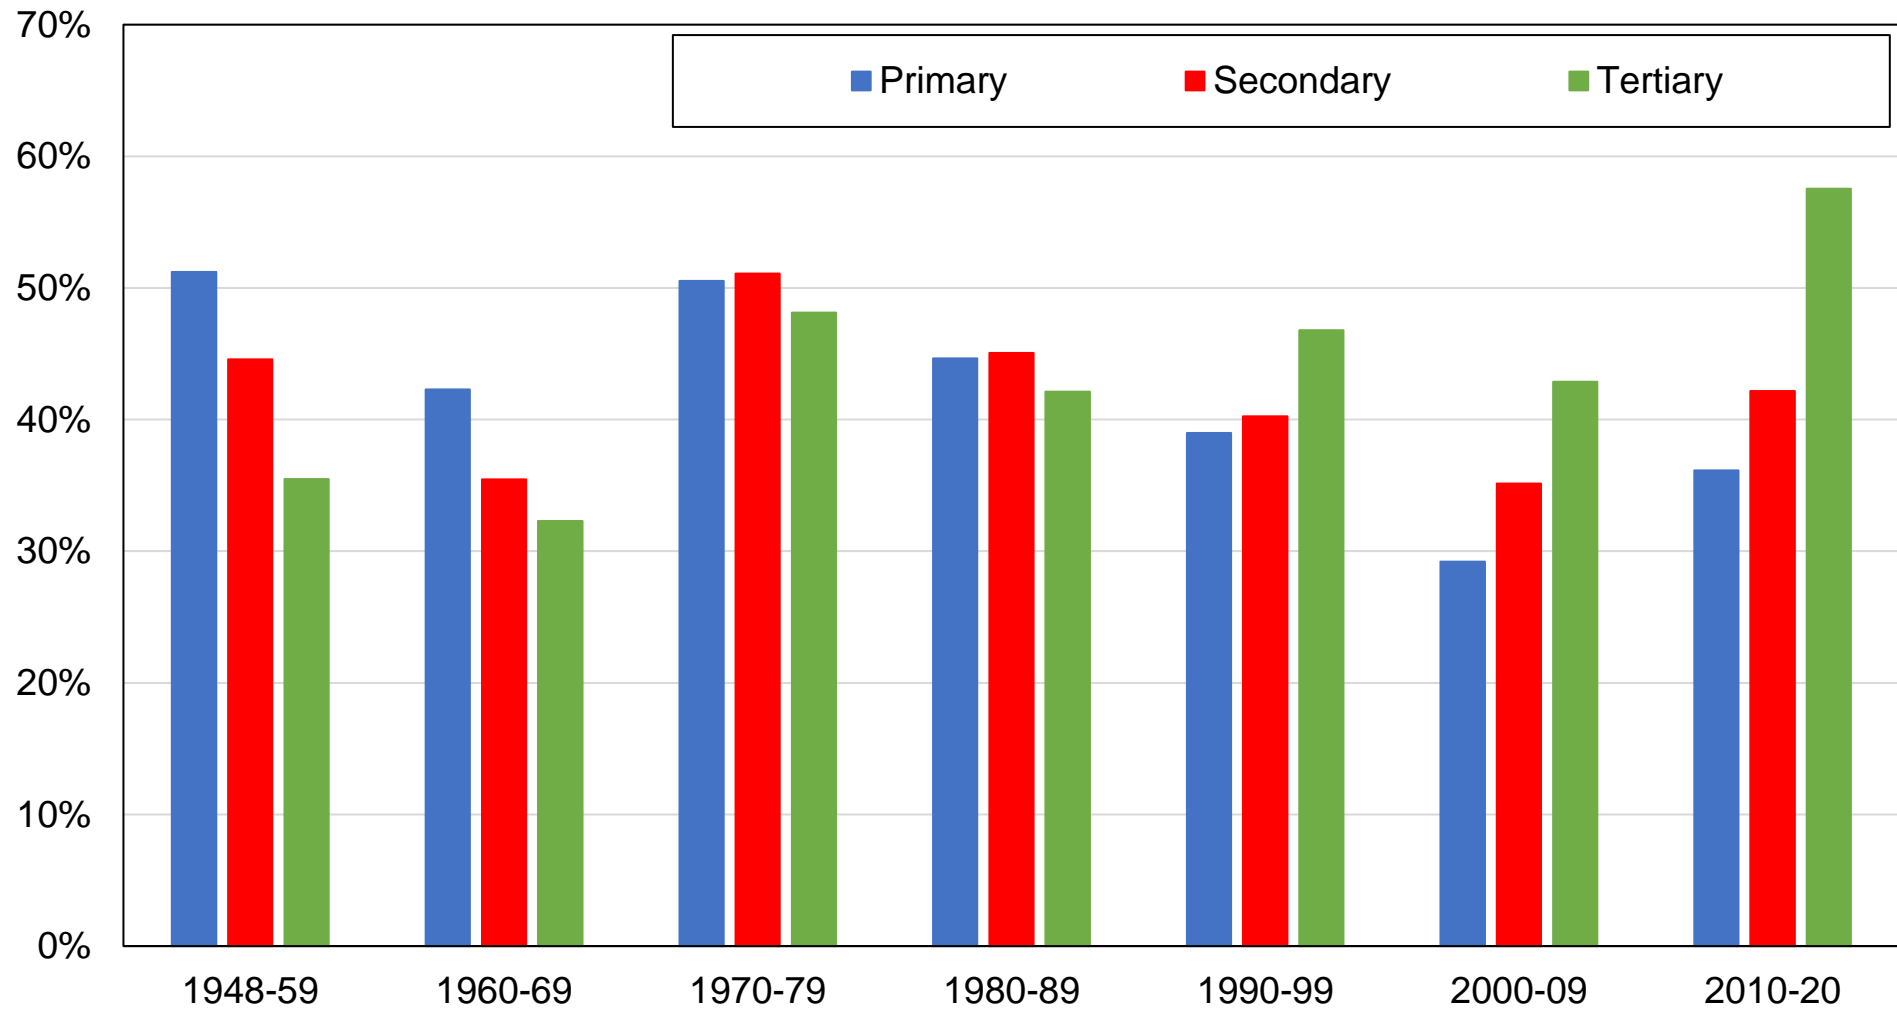

**Source:** authors' computations using French electoral surveys.

**Note:** the figure shows the share of votes received by left-wing parties (PS, PCF, Radicaux, etc.) by education level.

**Figure EA8 - Vote for SPD / Die Grünen / Die Linke by education level in Germany**

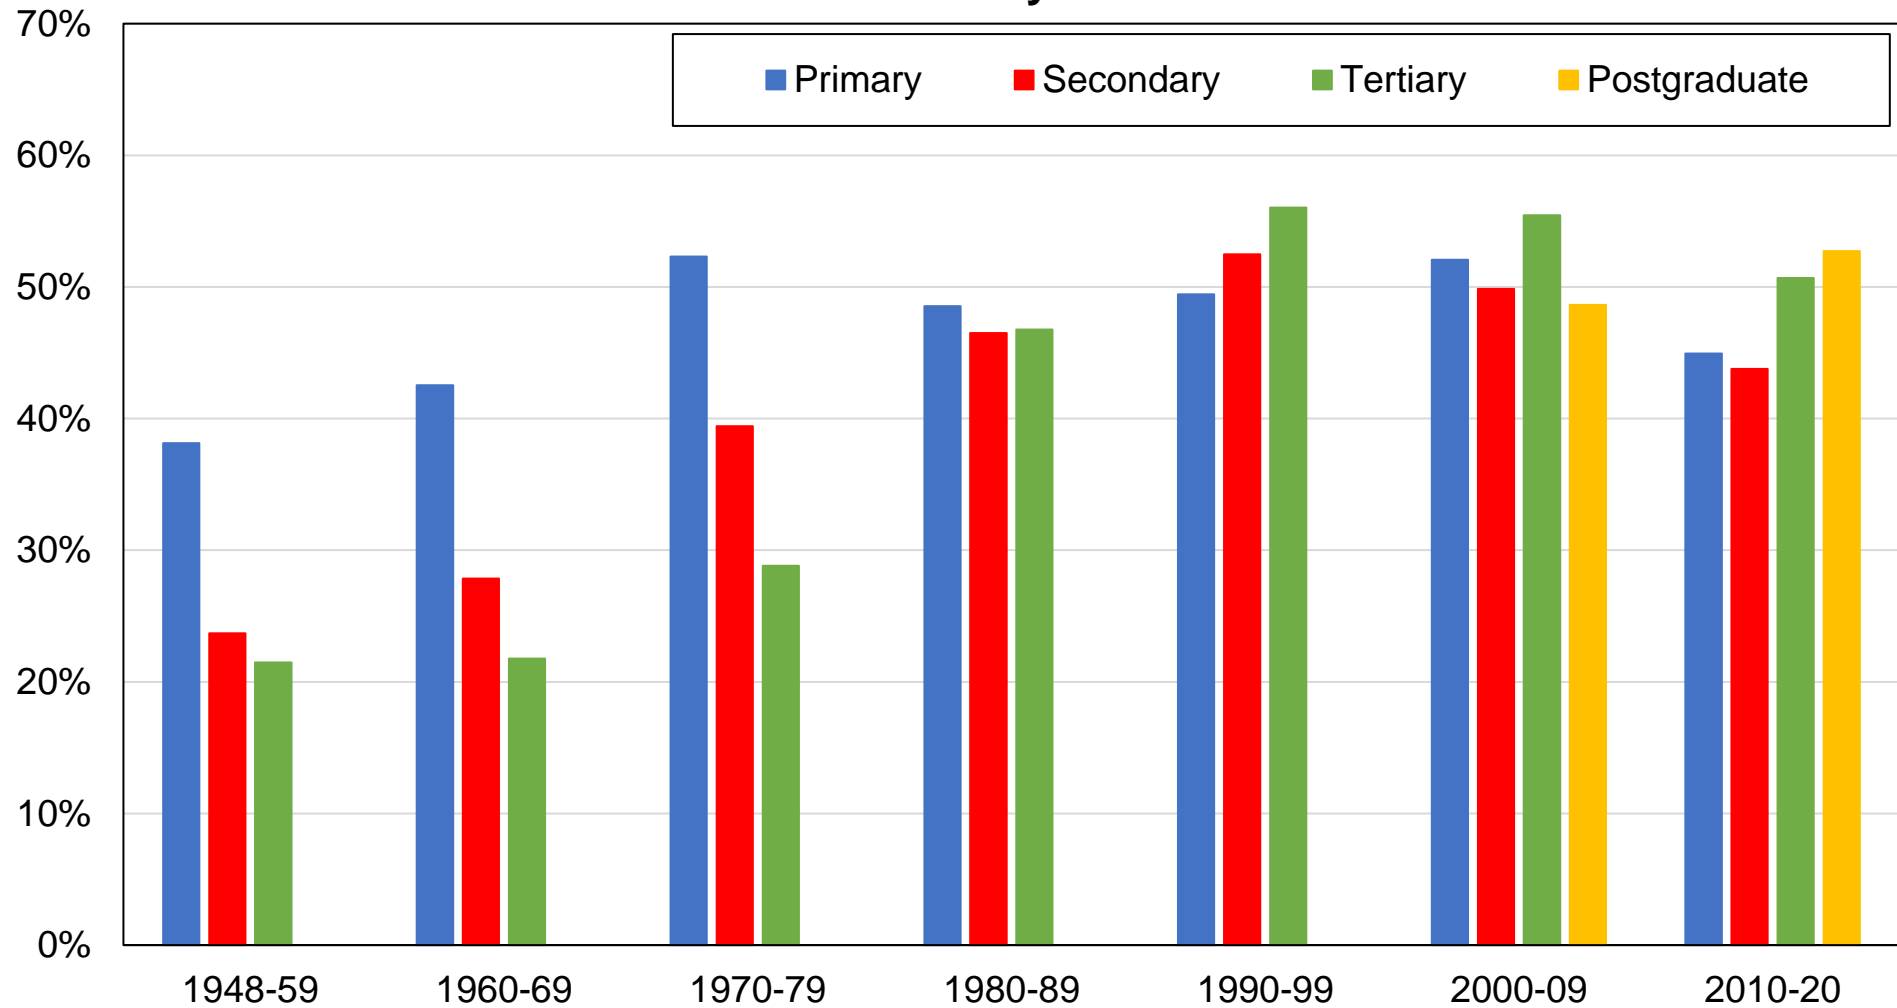

**Source:** authors' computations using German election studies.

**Note:** the figure shows the share of votes received by SPD / Die Grünen / Die Linke by education level.

**Figure EA9 - Vote for Social Democratic Alliance / Left-Green movement  
by education level in Iceland**

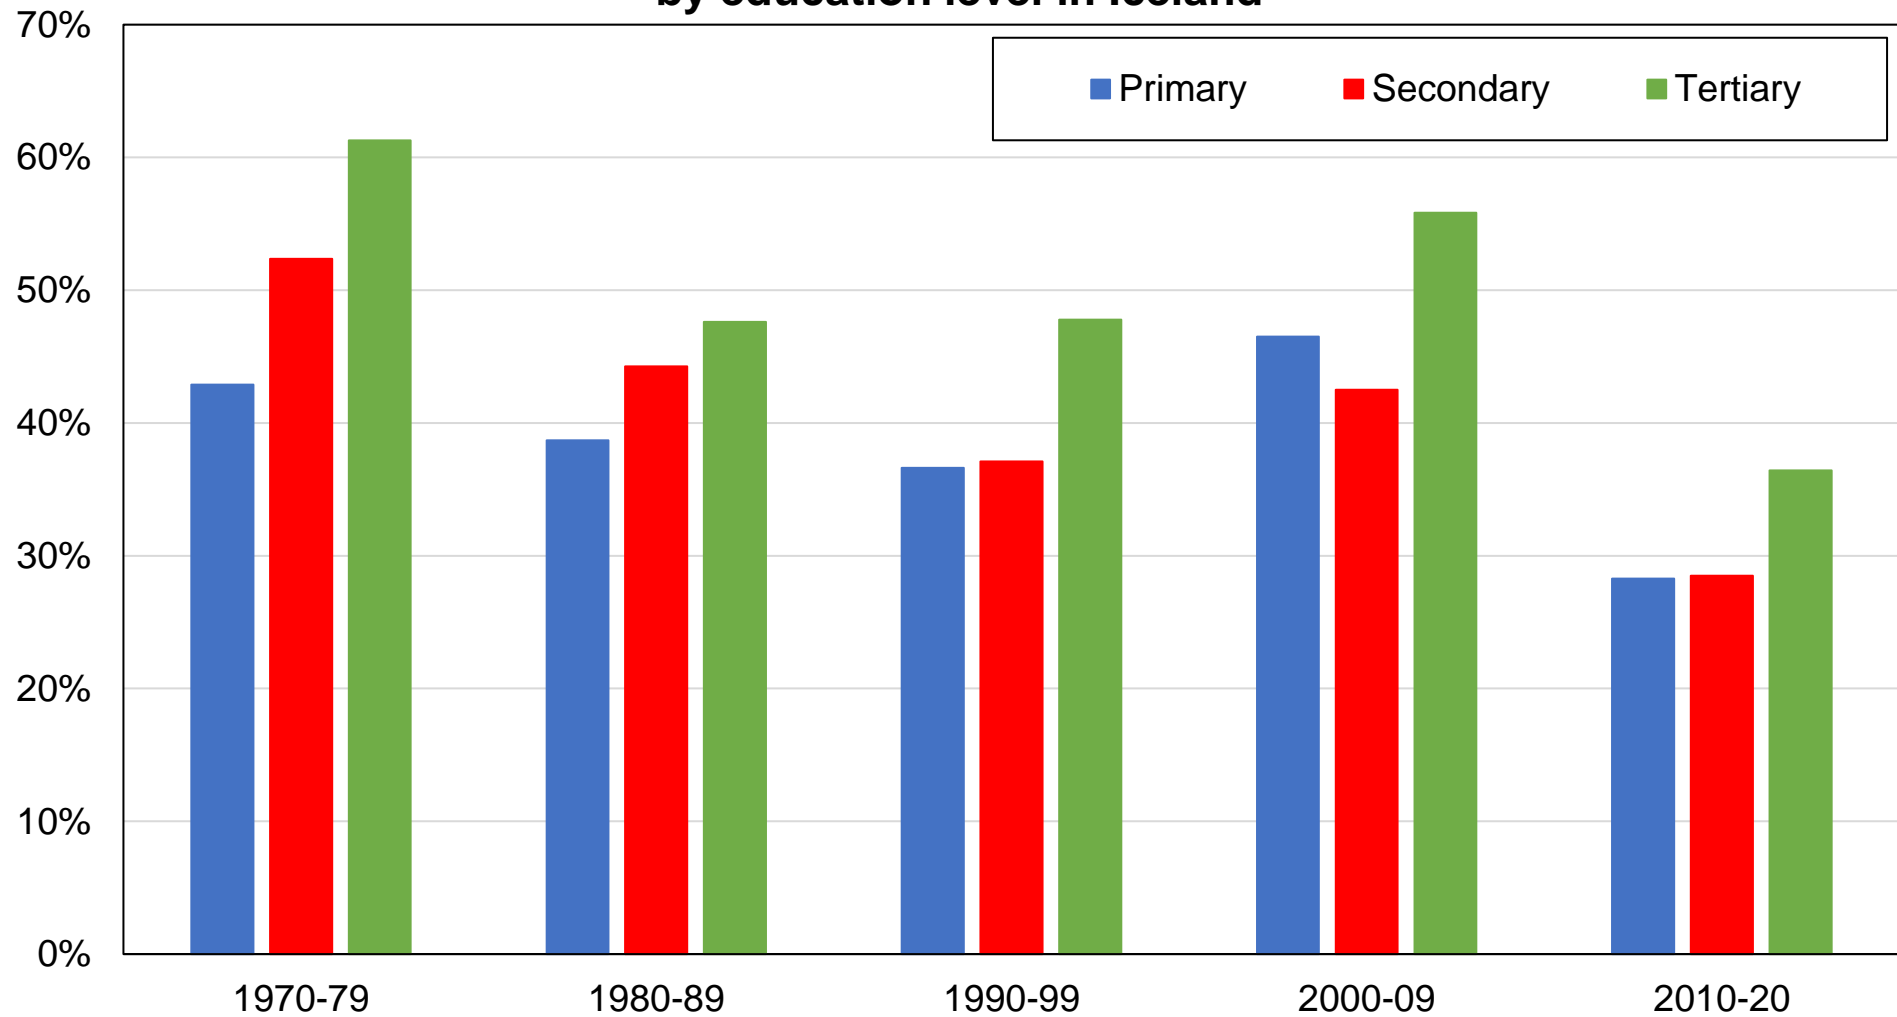

**Source:** authors' computations using Icelandic post-electoral surveys.

**Note:** the figure shows the share of votes received by Social Democratic Alliance / Left-Green movement by education level.

**Figure EA10 - Vote for Fianna Fáil / Sinn Féin / Labour / Other left by education level in Ireland**

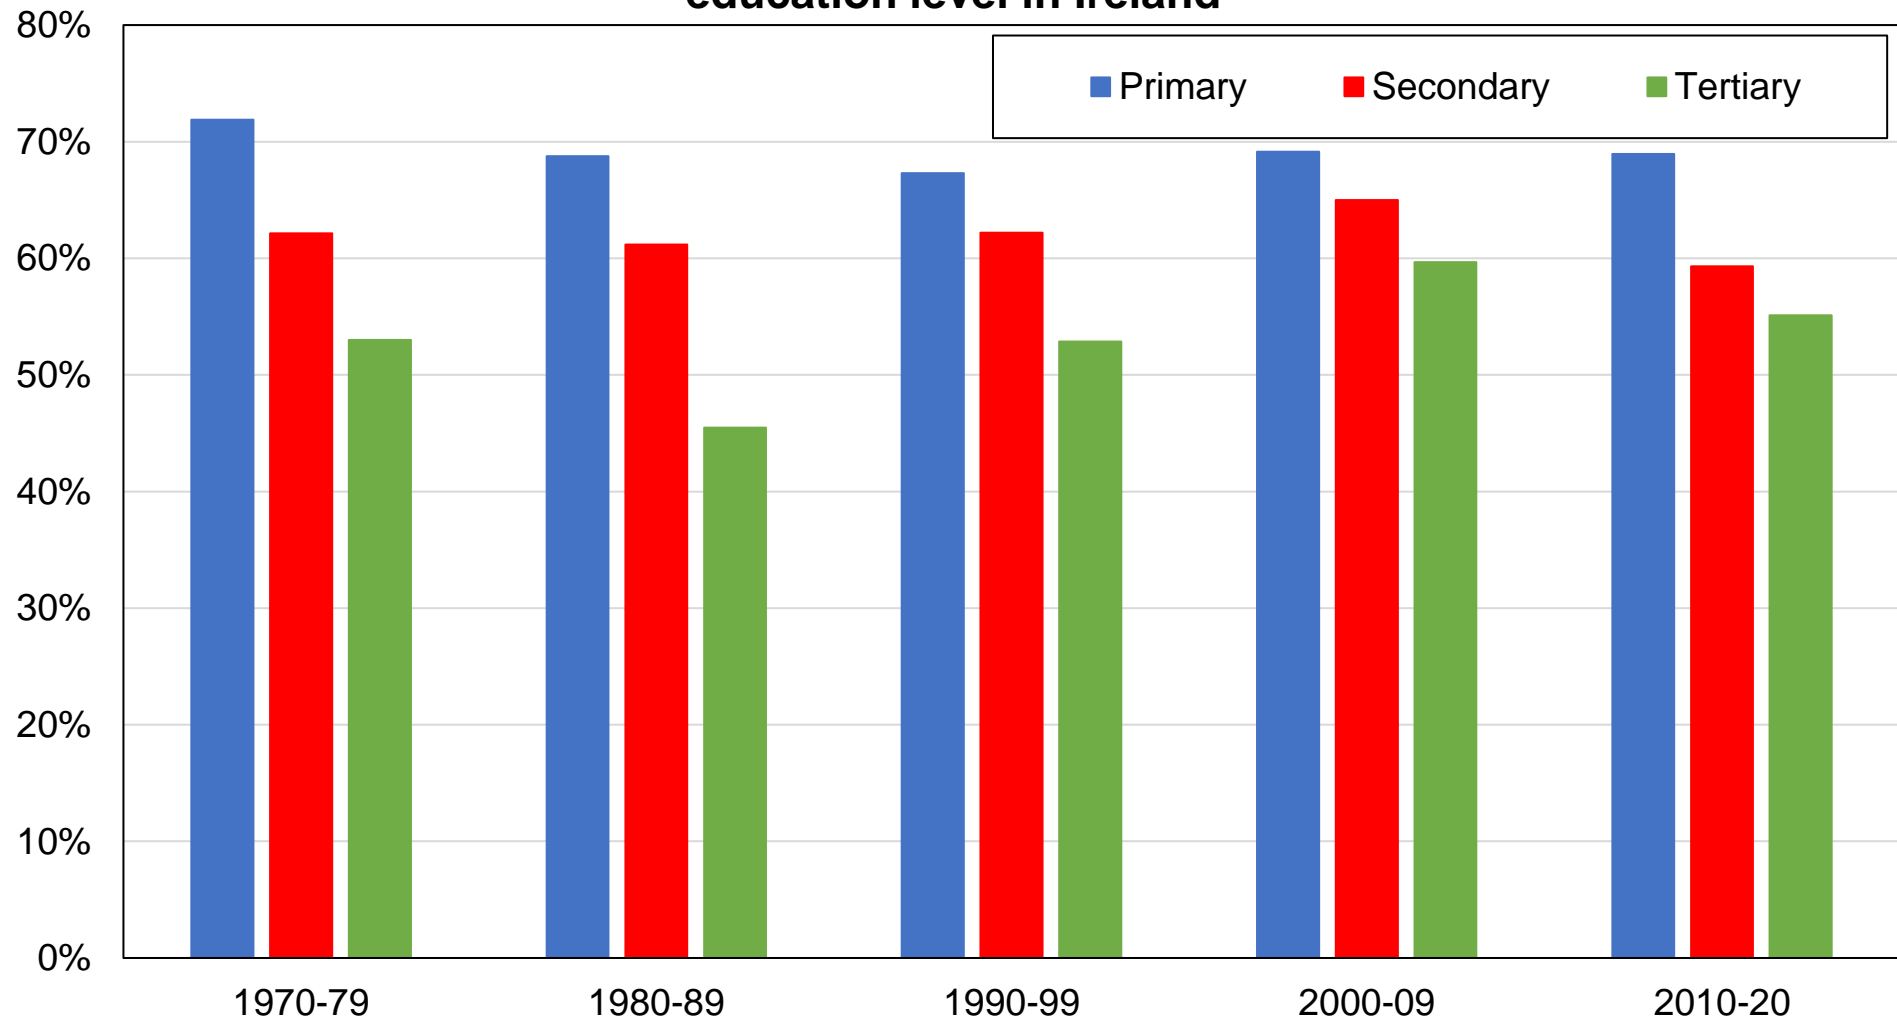

**Source:** authors' computations using Irish political attitudes surveys.

**Note:** the figure shows the share of votes received by Fianna Fáil and left-wing parties by education level.

**Figure EA11 - Vote for Social Democrats / Socialists / Communists / Greens by education level in Italy**

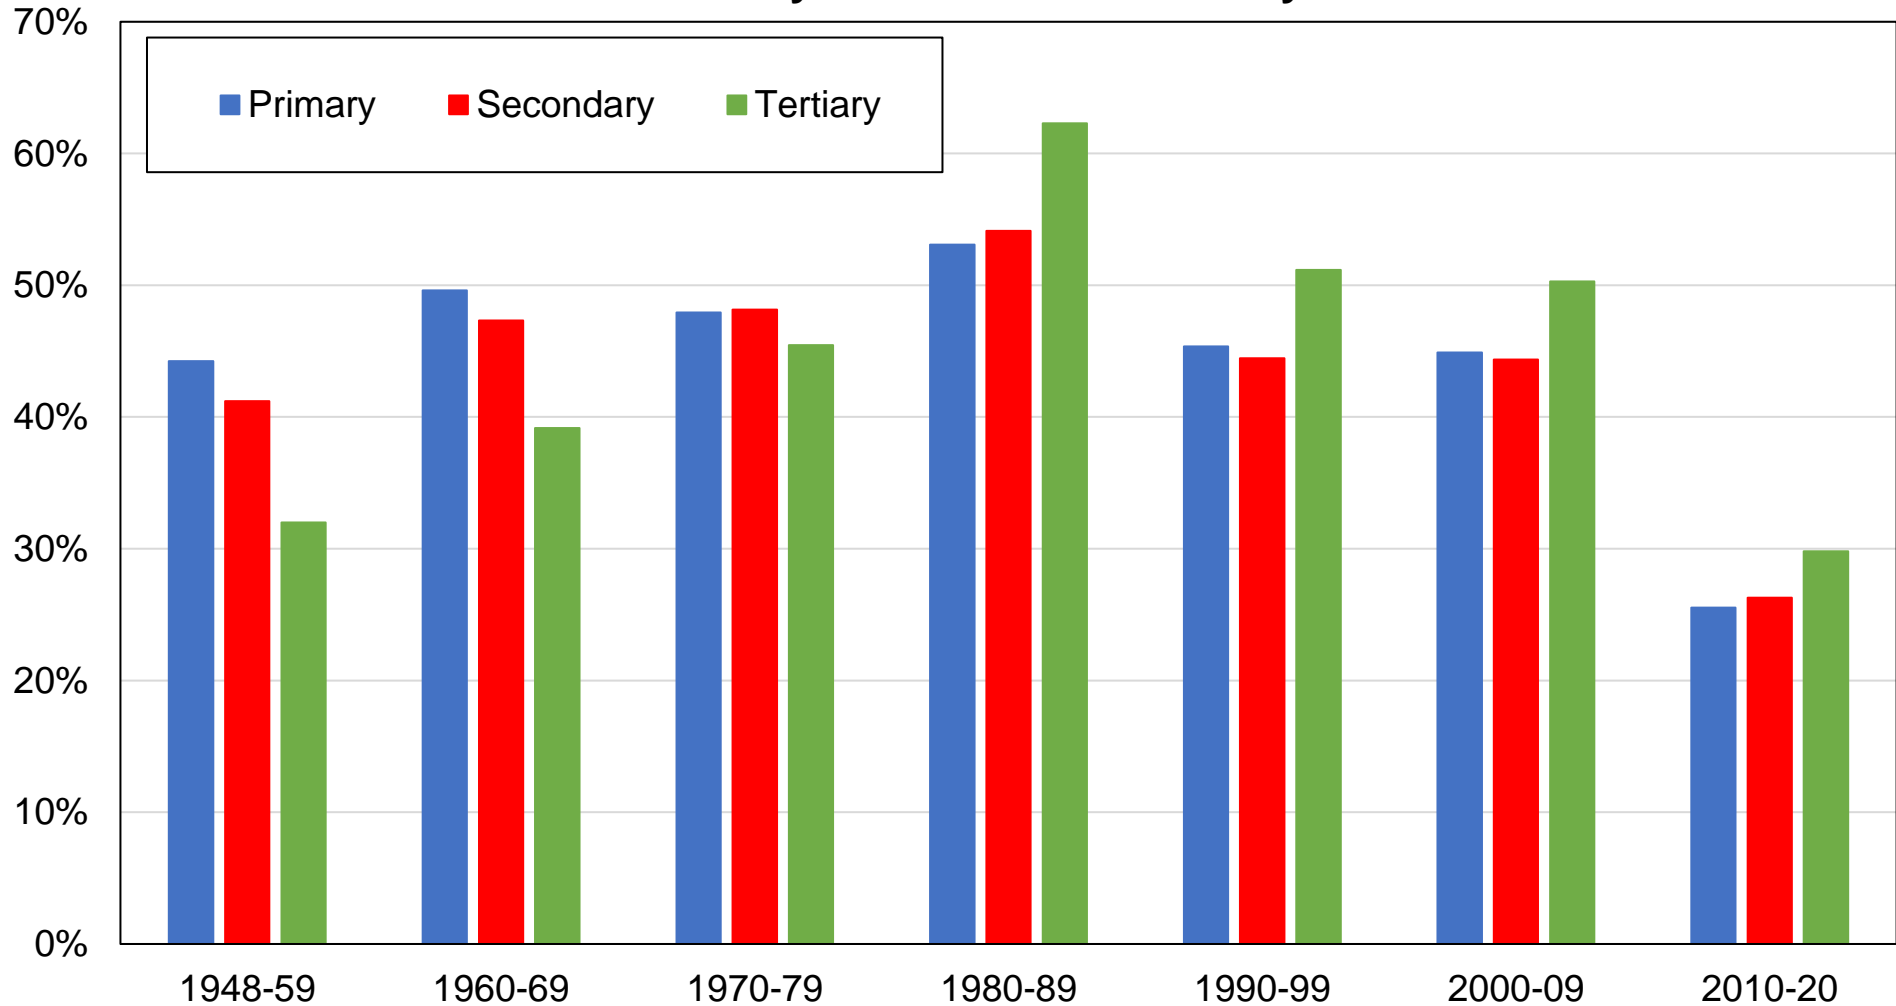

**Source:** authors' computations using Italian political attitudes surveys.

**Note:** the figure shows the share of votes received by left-wing parties by education level.

**Figure EA12 - Vote for LSAP / Greens / Other left by education level in Luxembourg**

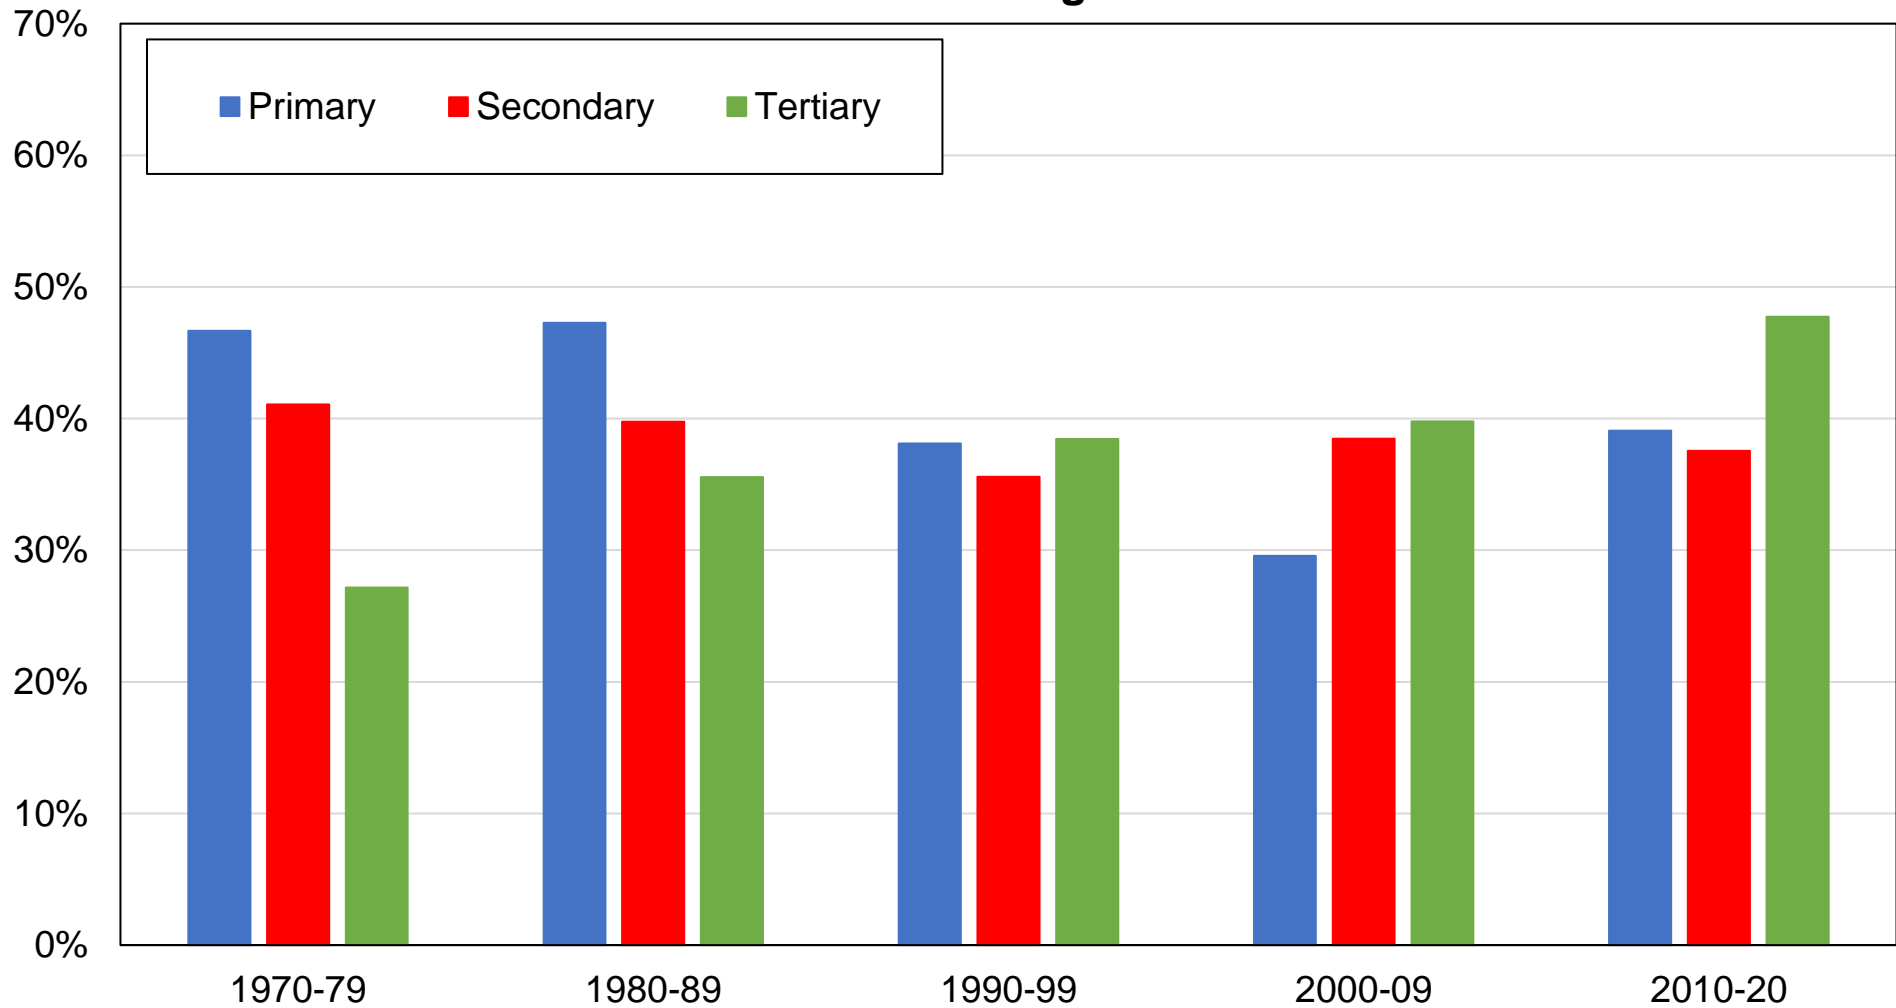

**Source:** authors' computations using Luxembourg political attitudes surveys.

**Note:** the figure shows the share of votes received by LSAP / Greens / Other left by education level.

**Figure EA13 - Vote for PvdA / D66 / Greens / Other left by education level in the Netherlands**

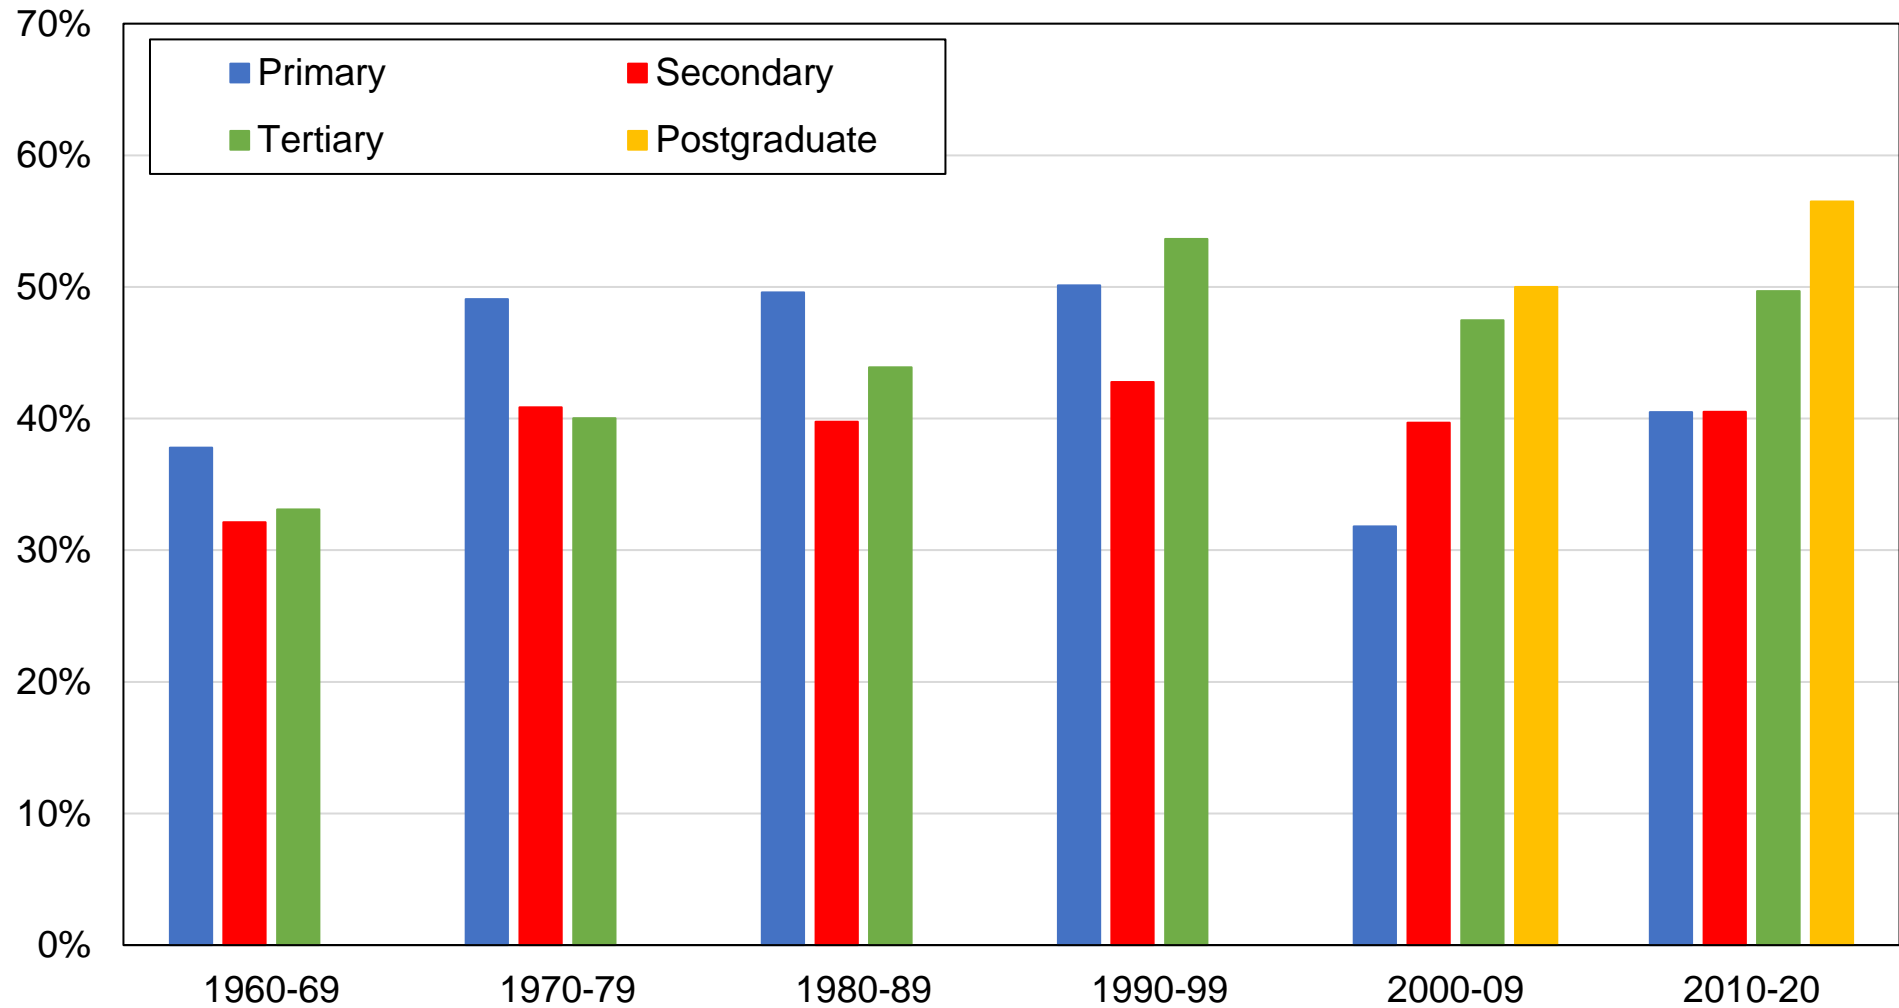

**Source:** authors' computations using Dutch political attitudes surveys.

**Note:** the figure shows the share of votes received by PvdA / D66 / Greens / Other left by education level.

**Figure EA14 - Vote for Labour / Greens / Other left by education level in New Zealand**

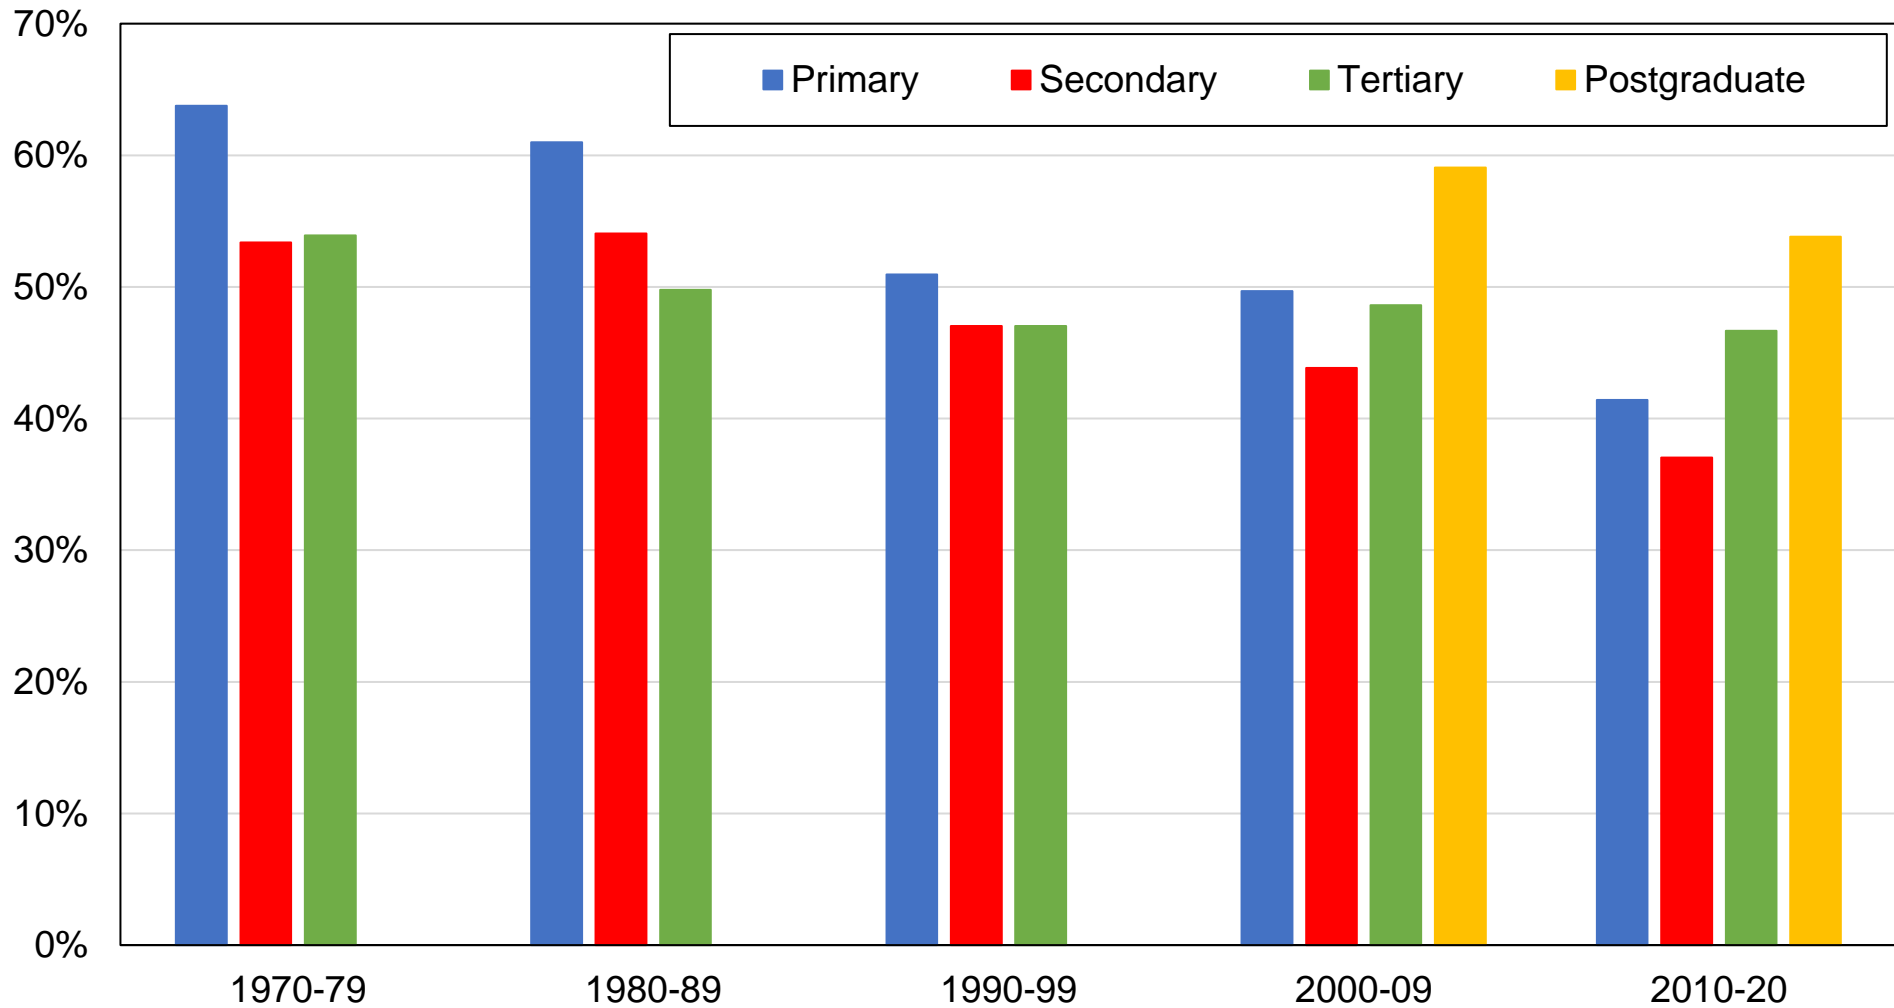

**Source:** authors' computations using New Zealand political attitudes surveys.

**Note:** the figure shows the share of votes received by left-wing parties by education level.



**Figure EA15 - Vote for Labour Party / Socialist Left Party / Other left by education level in Norway**

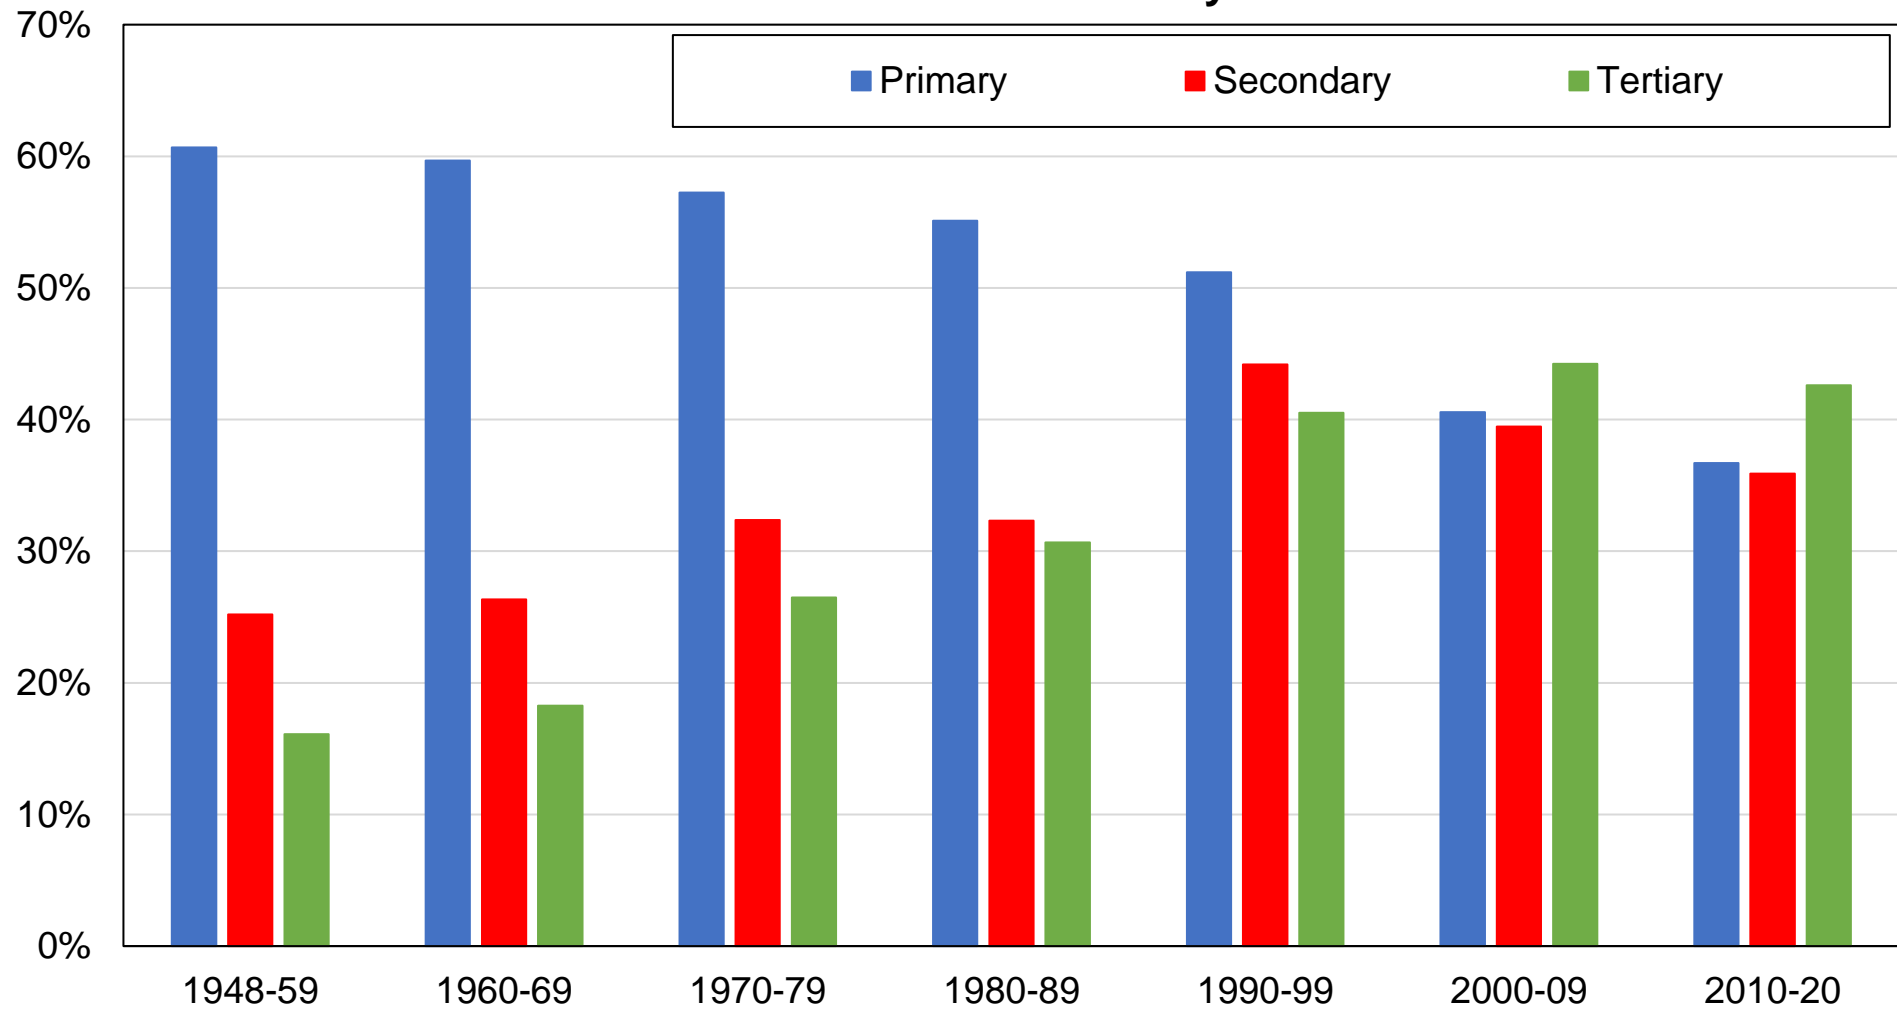

**Source:** authors' computations using Norwegian post-electoral surveys.

**Note:** the figure shows the share of votes received by Labour Party / Socialist Left Party / Other left by education level.

**Figure EA16 - Vote for Socialists / Communists / Greens / Left bloc by education level in Portugal**

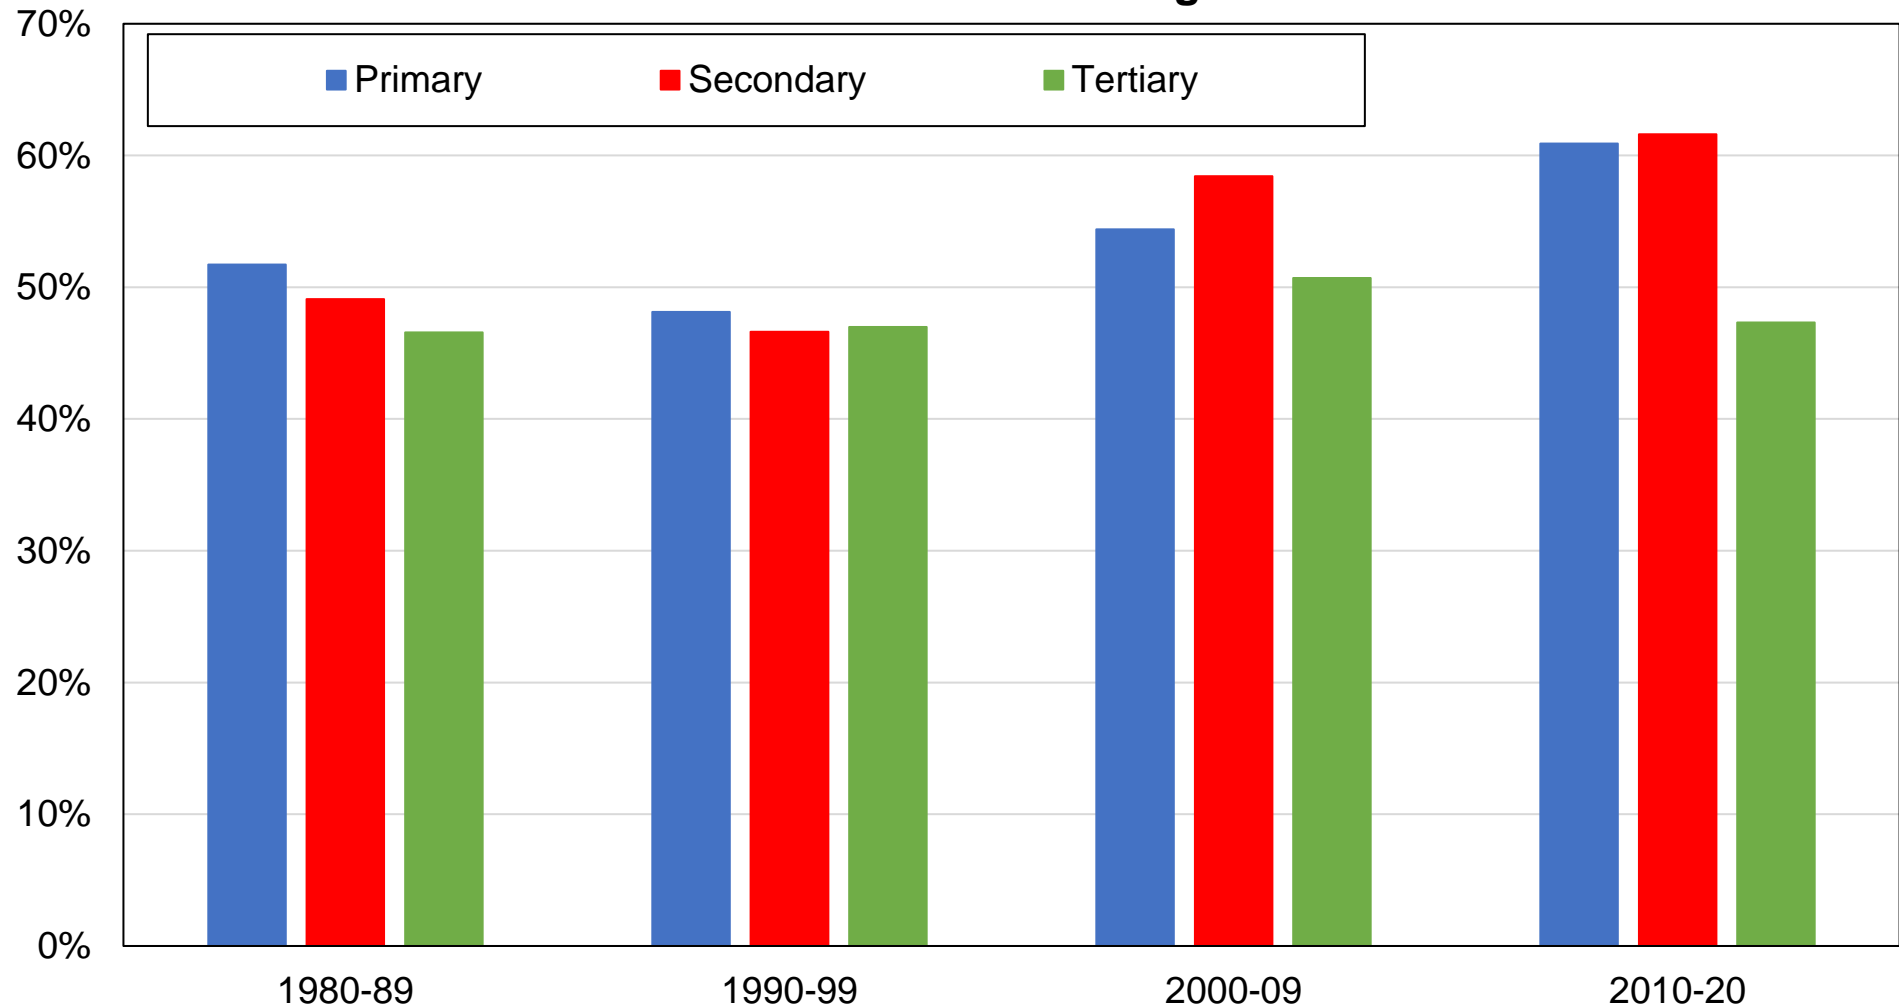

**Source:** authors' computations using Portuguese political attitudes surveys.

**Note:** the figure shows the share of votes received by left-wing parties by education level.

**Figure EA17 - Vote for PSOE / Podemos / IU / Other left by education level in Spain**

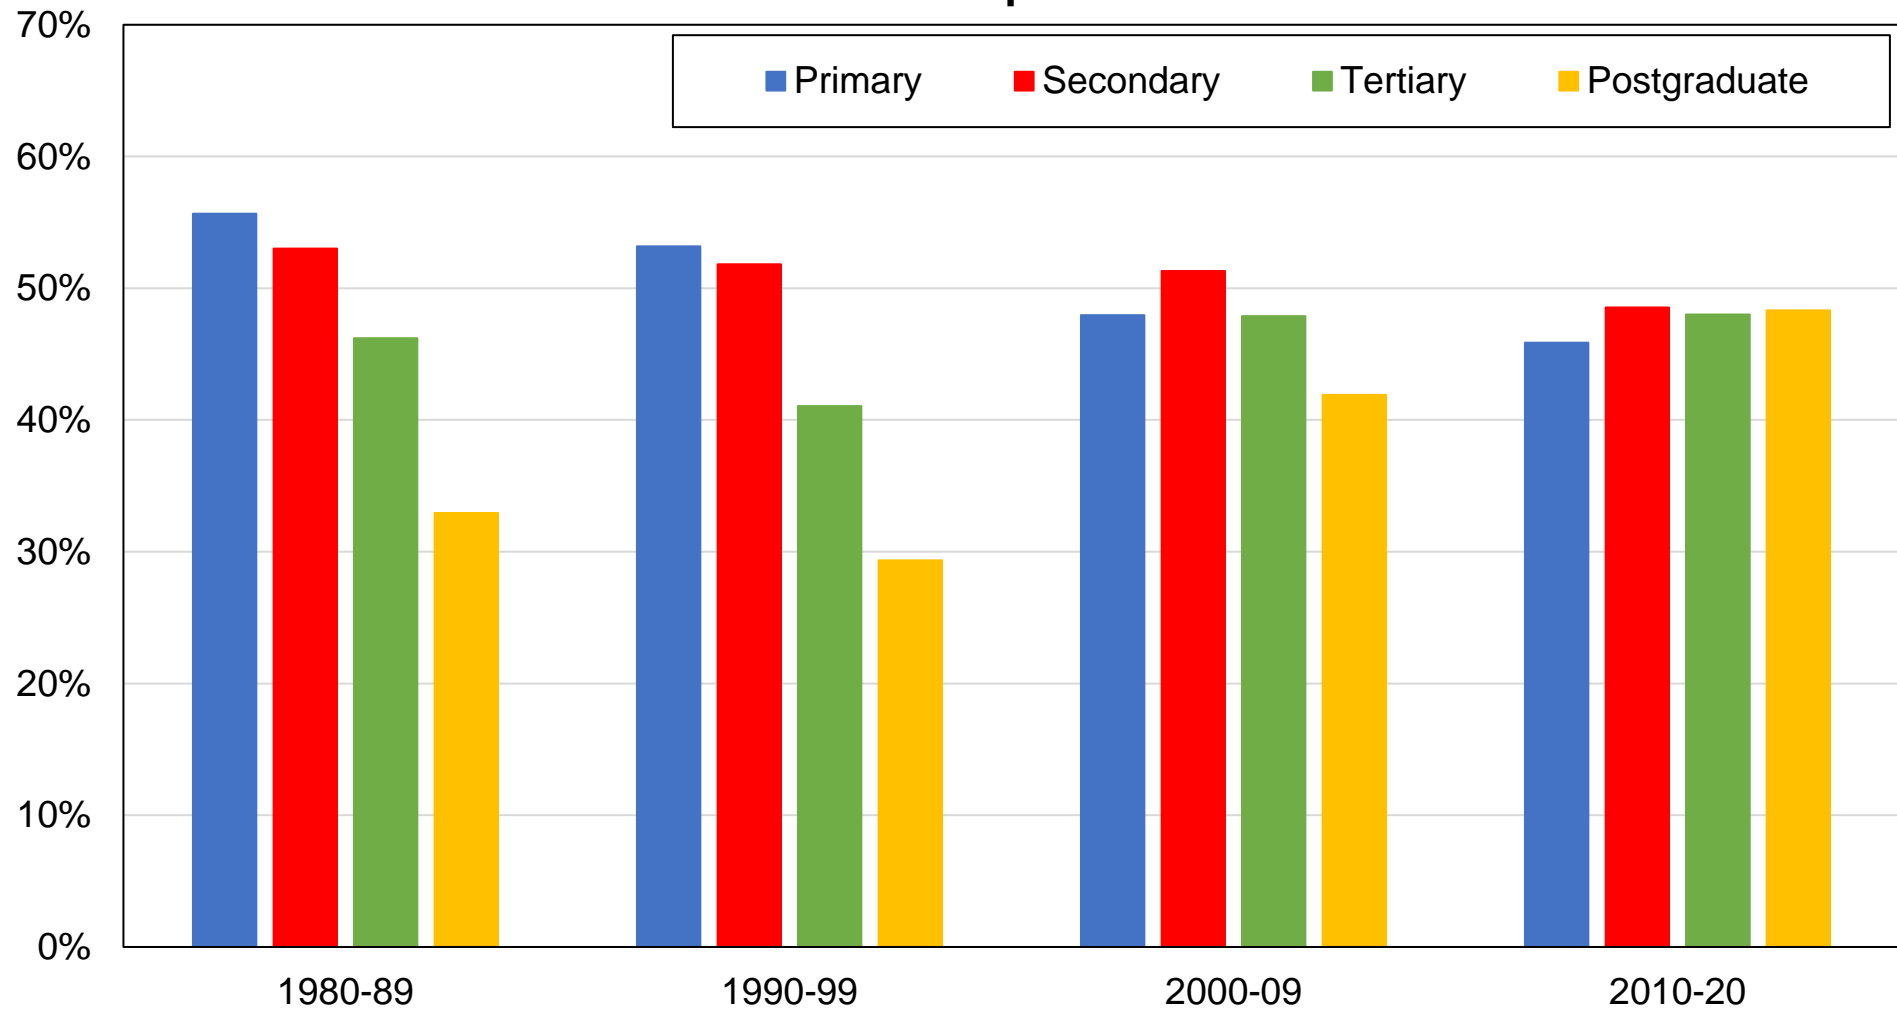

**Source:** authors' computations using Spanish political attitudes surveys.

**Note:** the figure shows the share of votes received by left-wing parties by education level.

**Figure EA18 - Vote for Social Democratic Party / Left Party / Green Party  
by education level in Sweden**

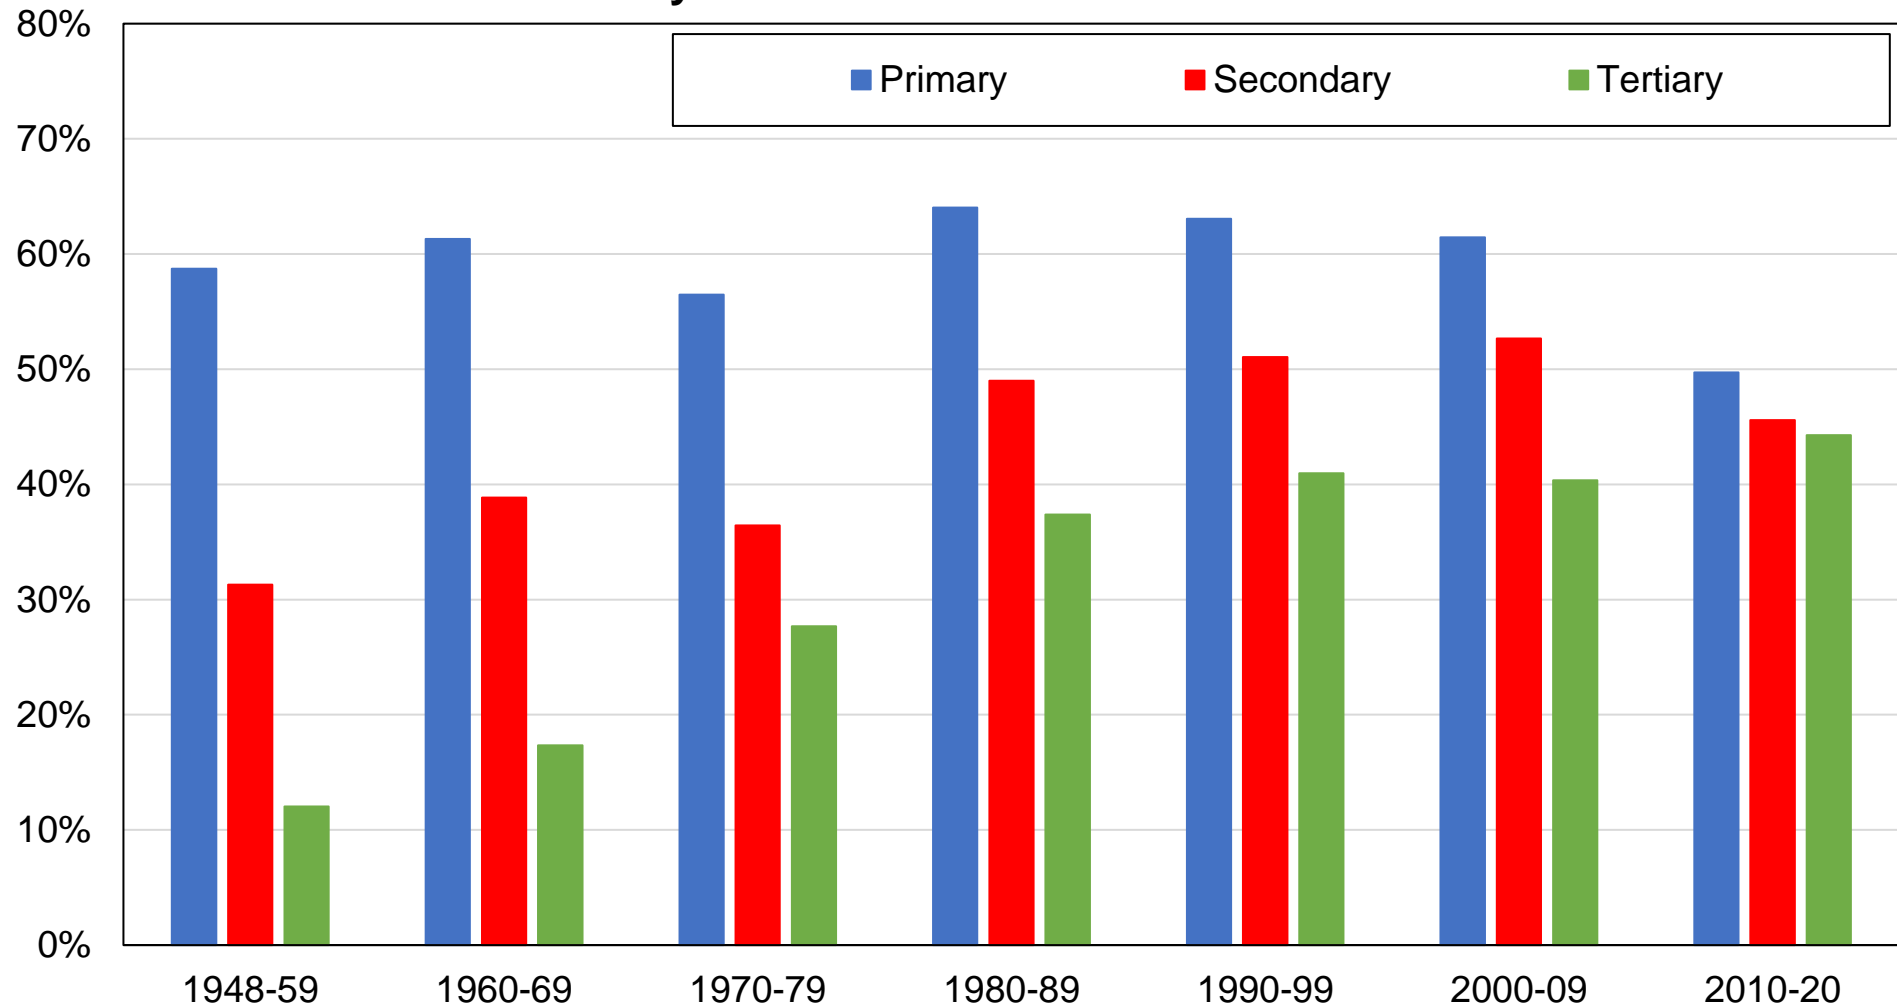

**Source:** authors' computations using Swedish electoral surveys.

**Note:** the figure shows the share of votes received by left-wing parties by education level.

**Figure EA19 - Vote for Social Democrats / Greens / Other left by education level in Switzerland**

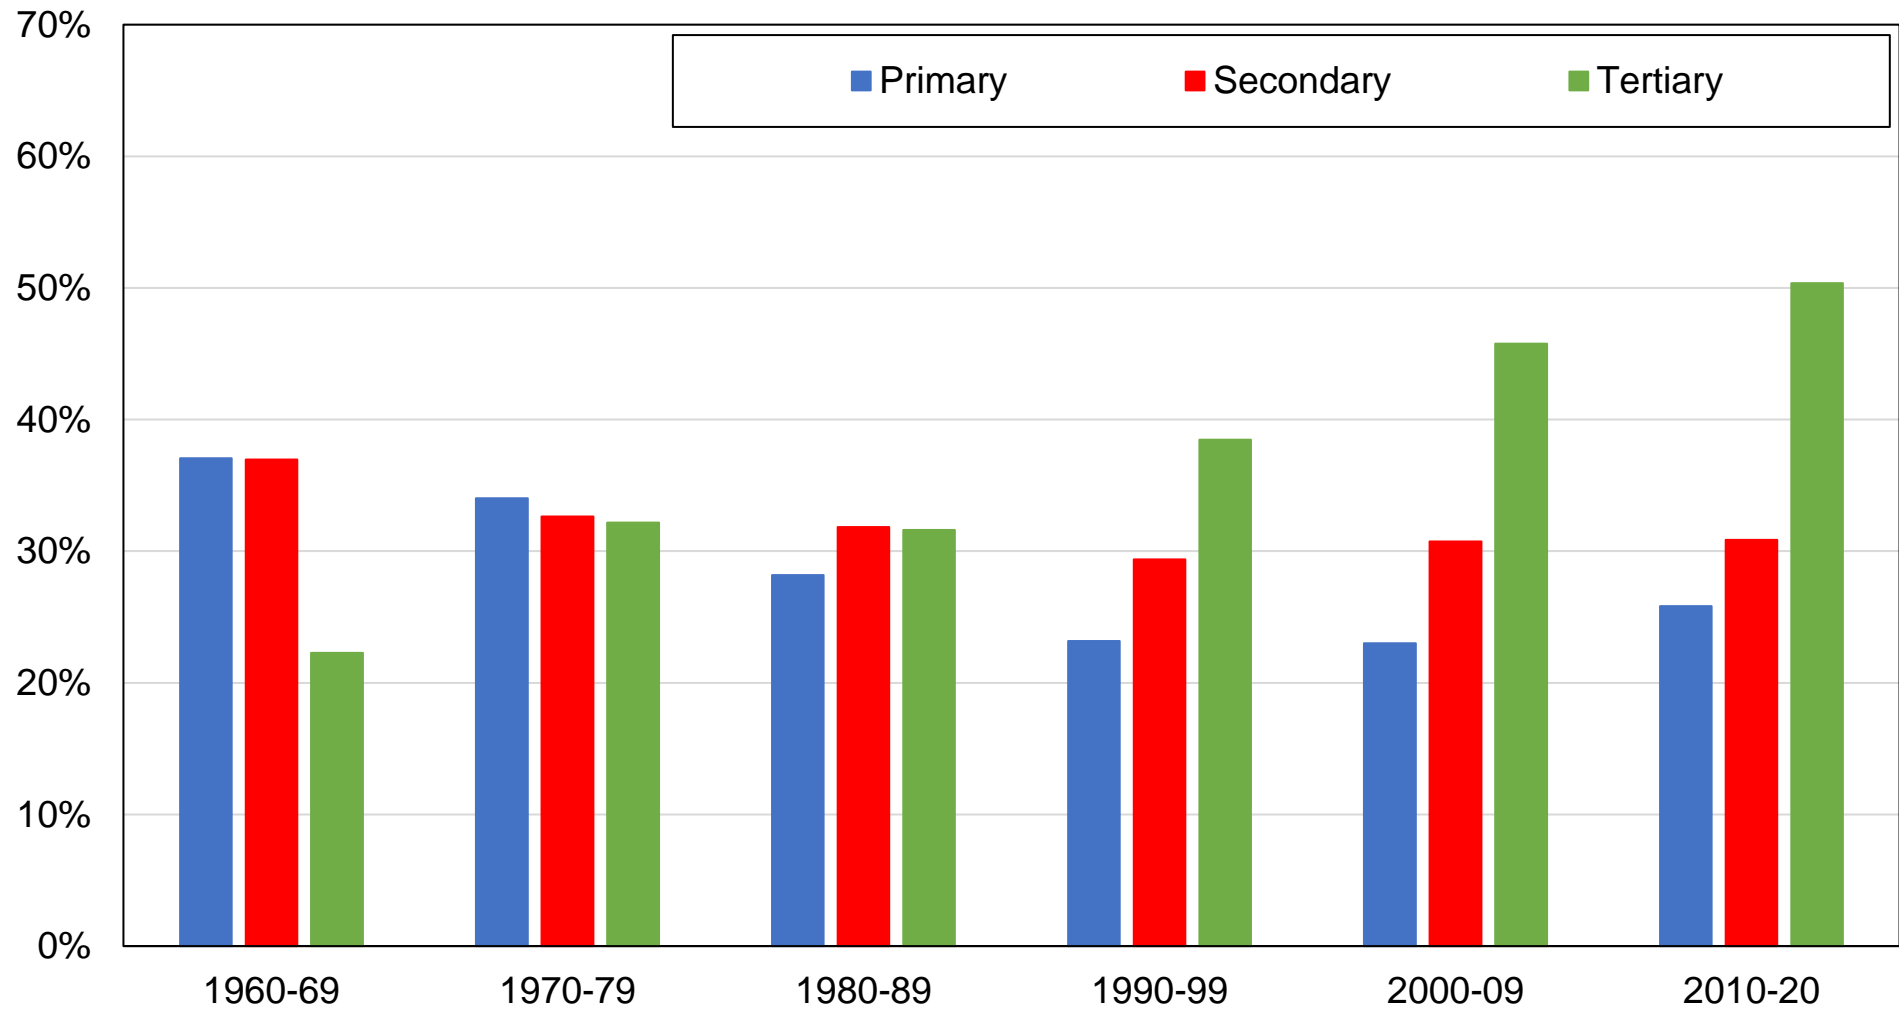

**Source:** authors' computations using Swiss political attitudes surveys.

**Note:** the figure shows the share of votes received by center-left / left-wing parties by education level.

**Figure EA20 - Vote for the Labour Party by education level in the United Kingdom**

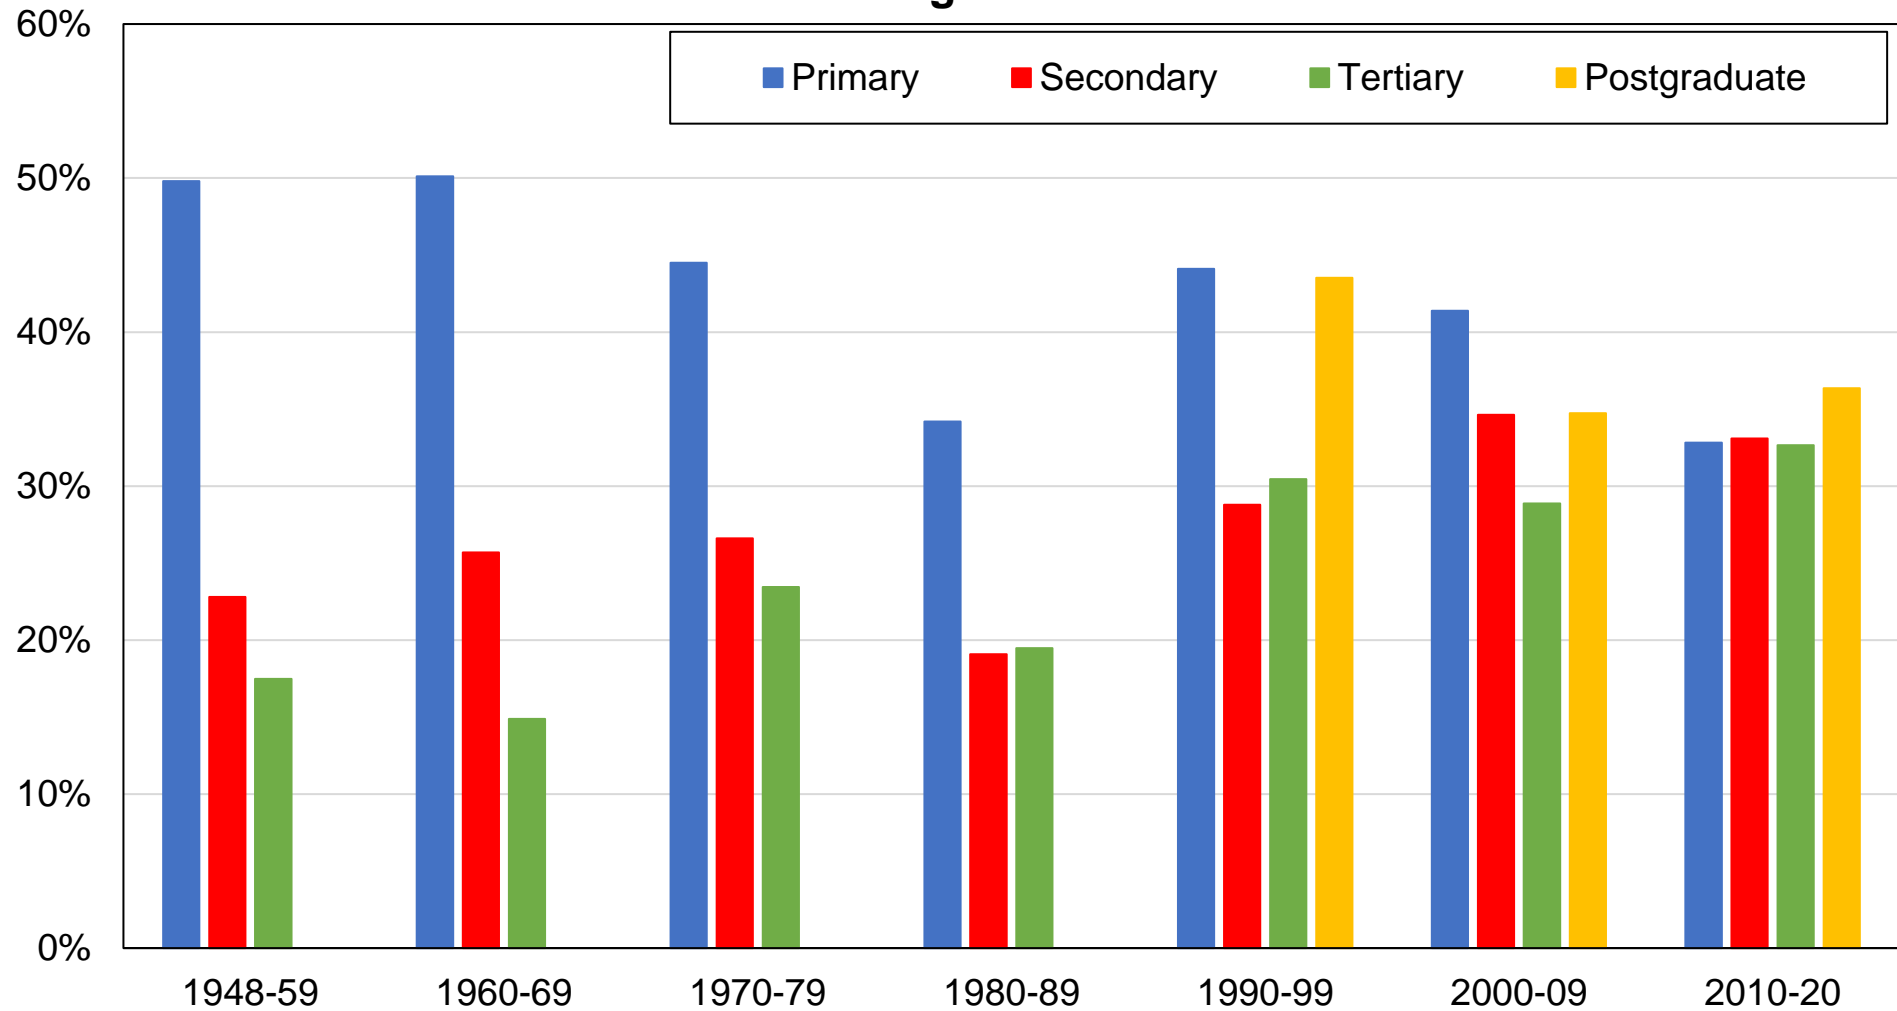

**Source:** authors' computations using British electoral surveys.

**Note:** the figure shows the share of votes received by the Labour Party by education level.

**Figure EA21 - Vote for the Democratic Party by education level in the United States**

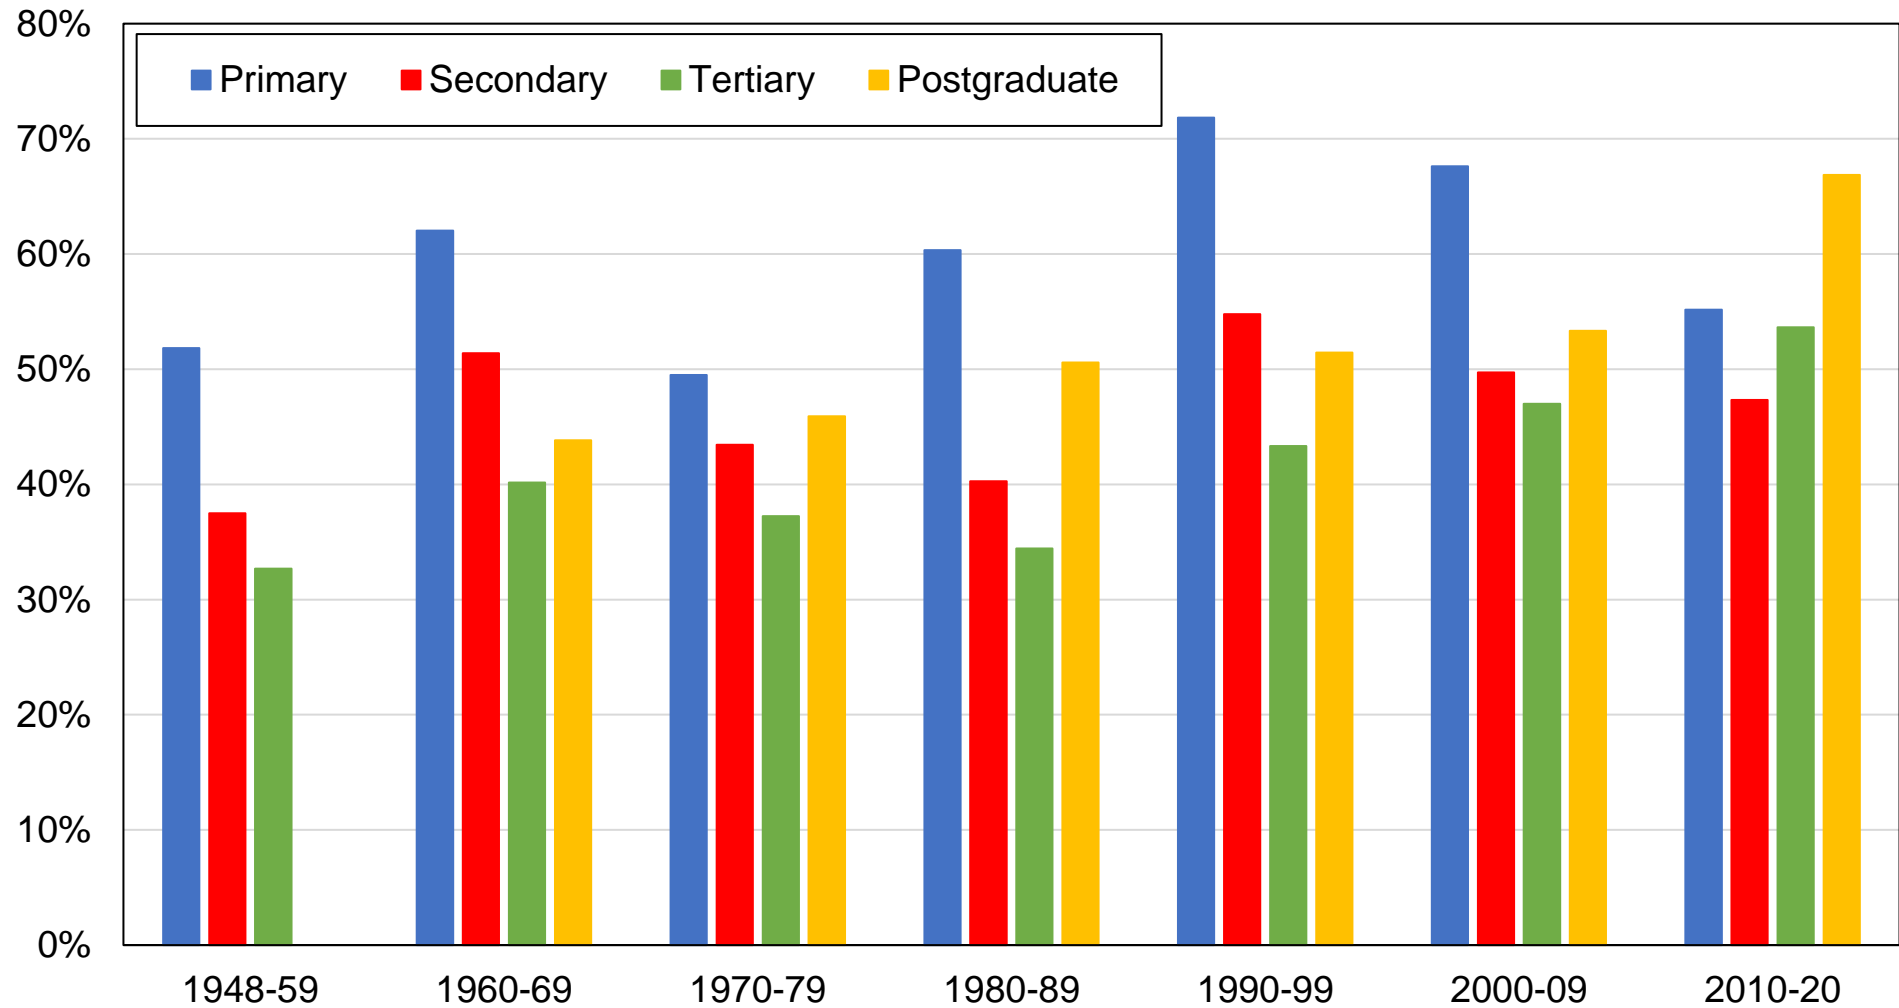

**Source:** authors' computations using American National Election Studies.

**Note:** the figure shows the share of votes received by the Democratic Party by education level.

**Figure EB1 - Vote for Labor / Greens by income group in Australia**

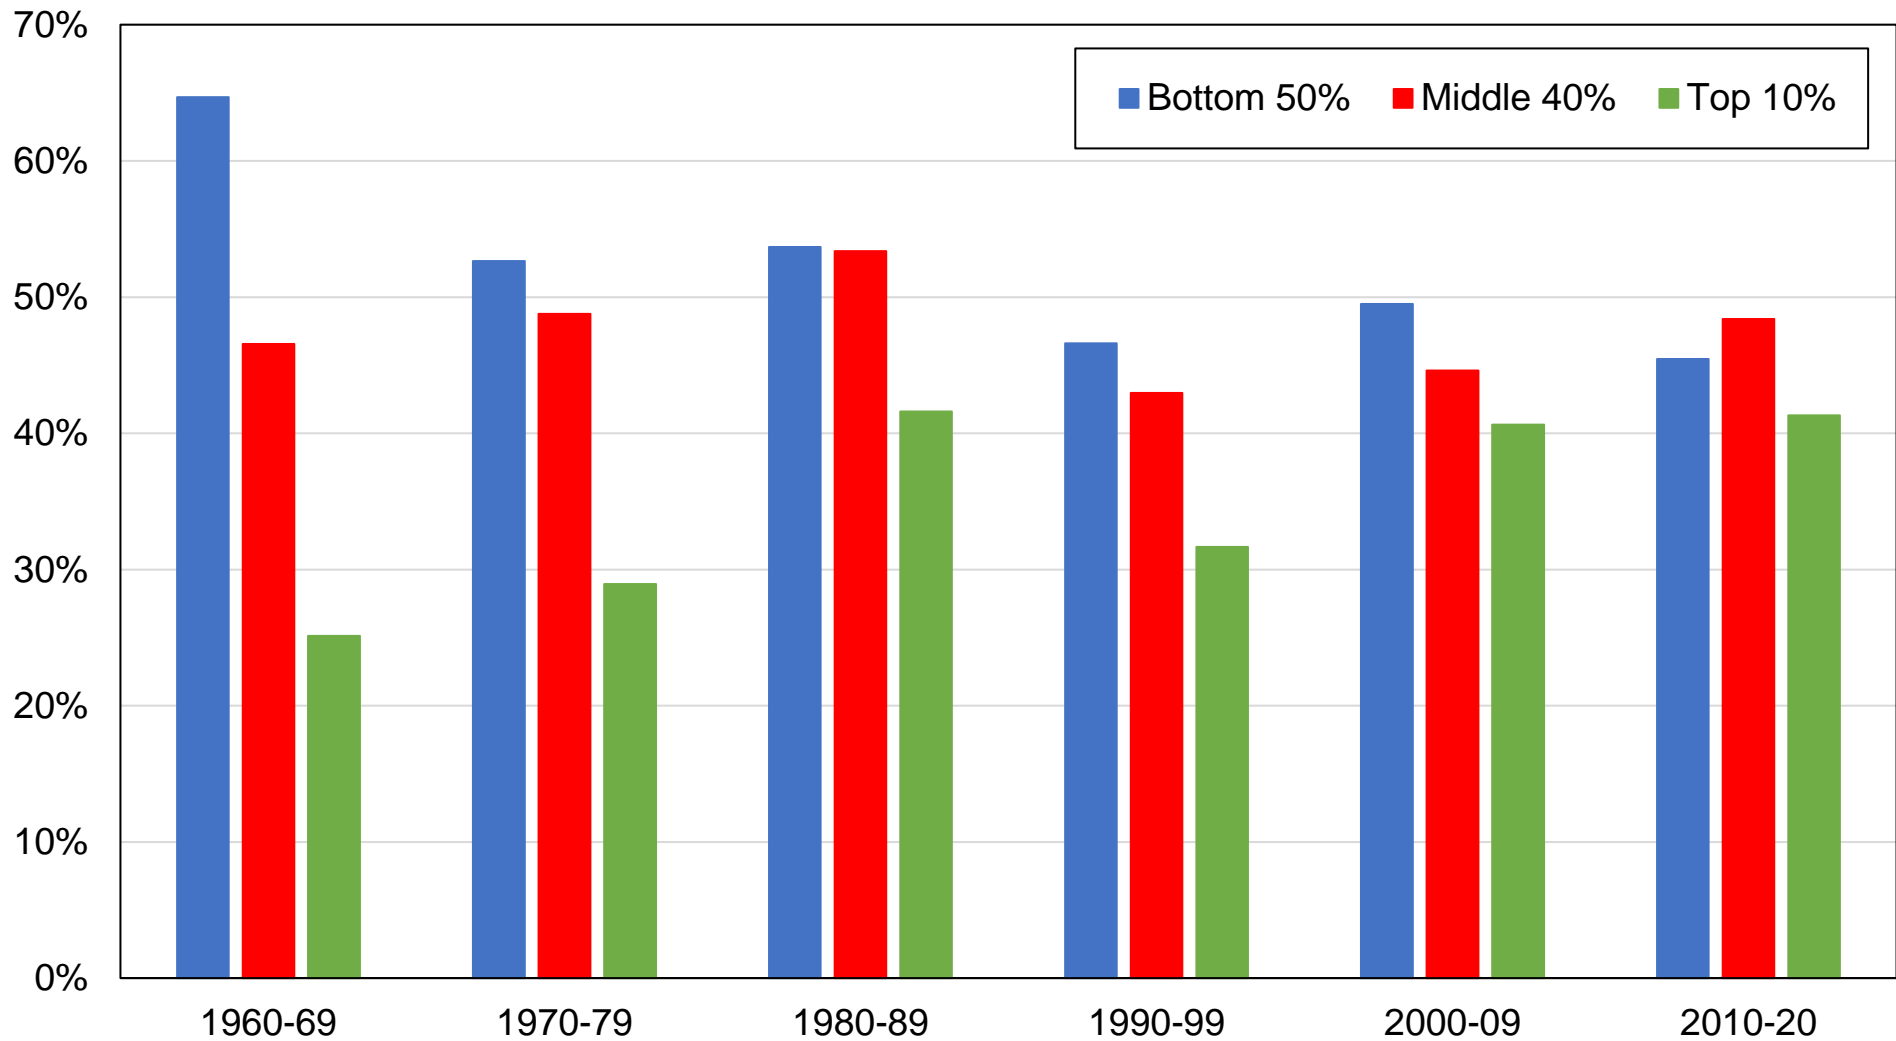

**Source:** authors' computations using Australian political attitudes surveys.

**Note:** the figure shows the share of votes received Labor / Greens by income group.



**Figure EB2 - Vote SPÖ / KPÖ / Greens / NEOS by income group in Austria**

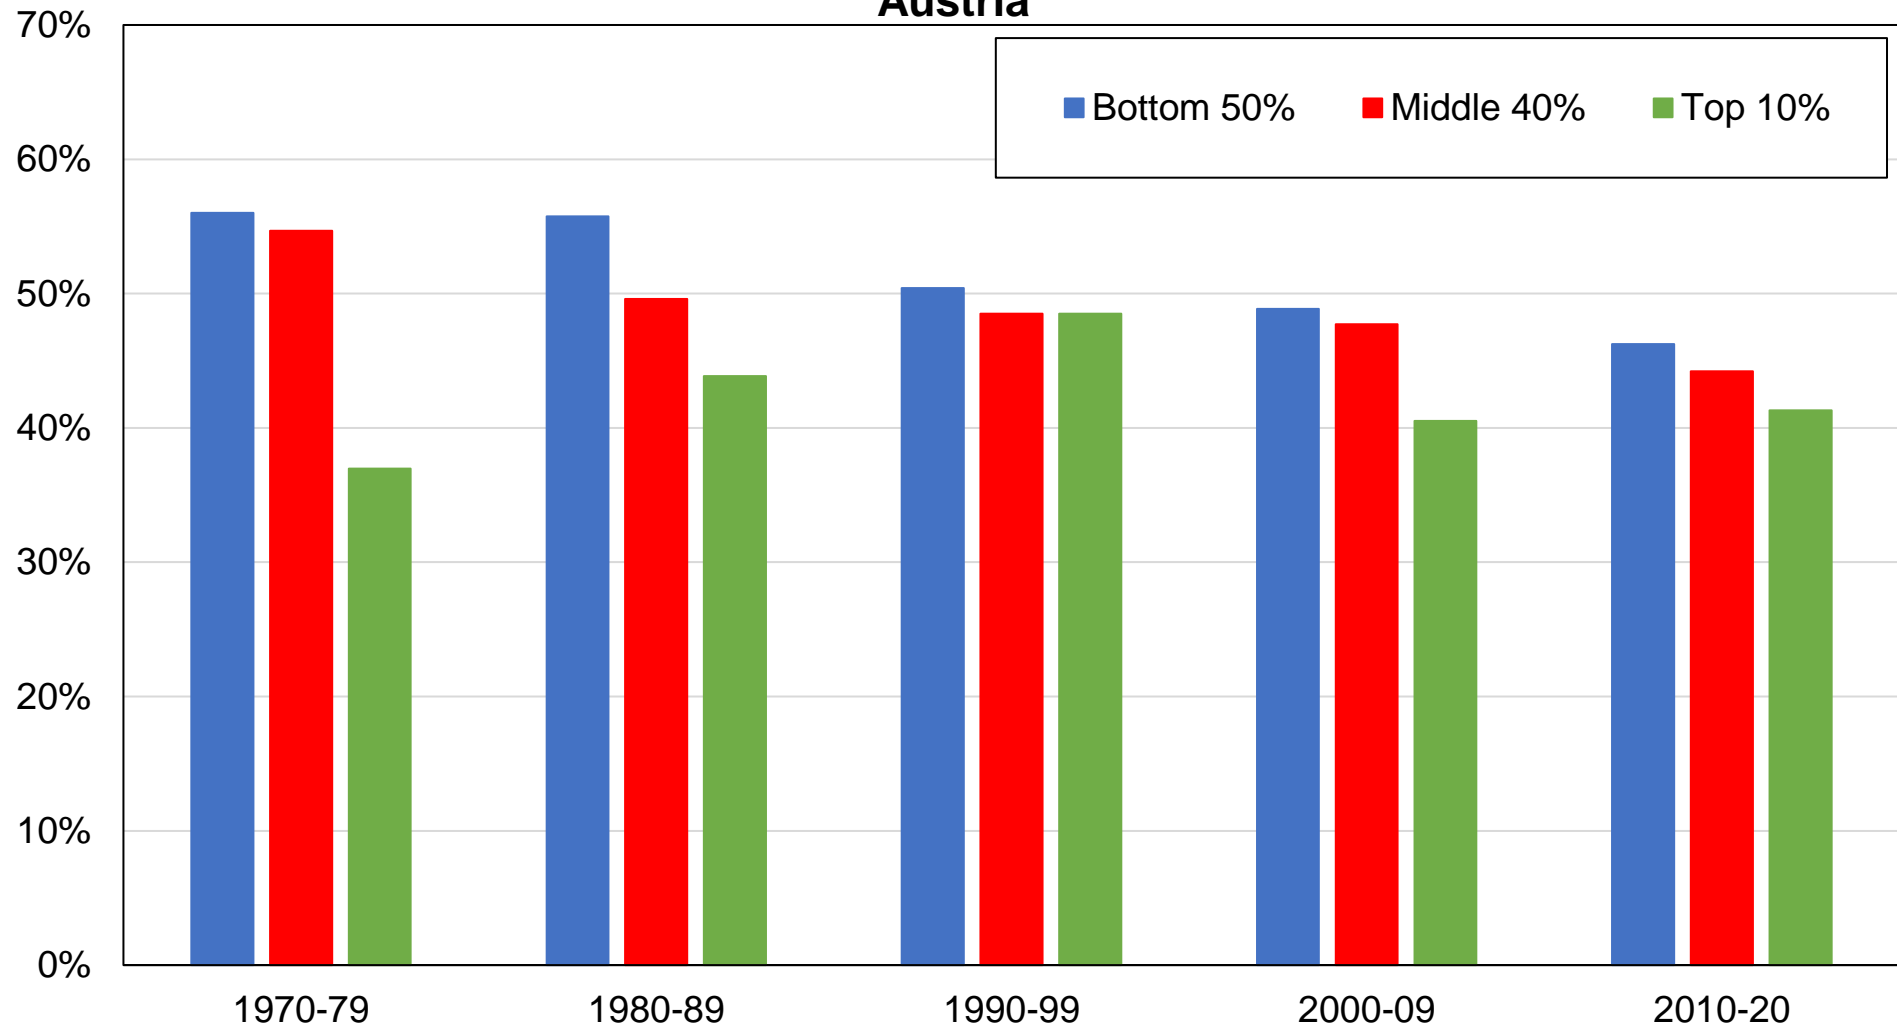

**Source:** authors' computations using Austrian political attitudes surveys.

**Note:** the figure shows the share of votes received by SPÖ / KPÖ / Greens / NEOS by income group.

**Figure EB3 - Vote for Socialists / Greens by income group in Belgium**

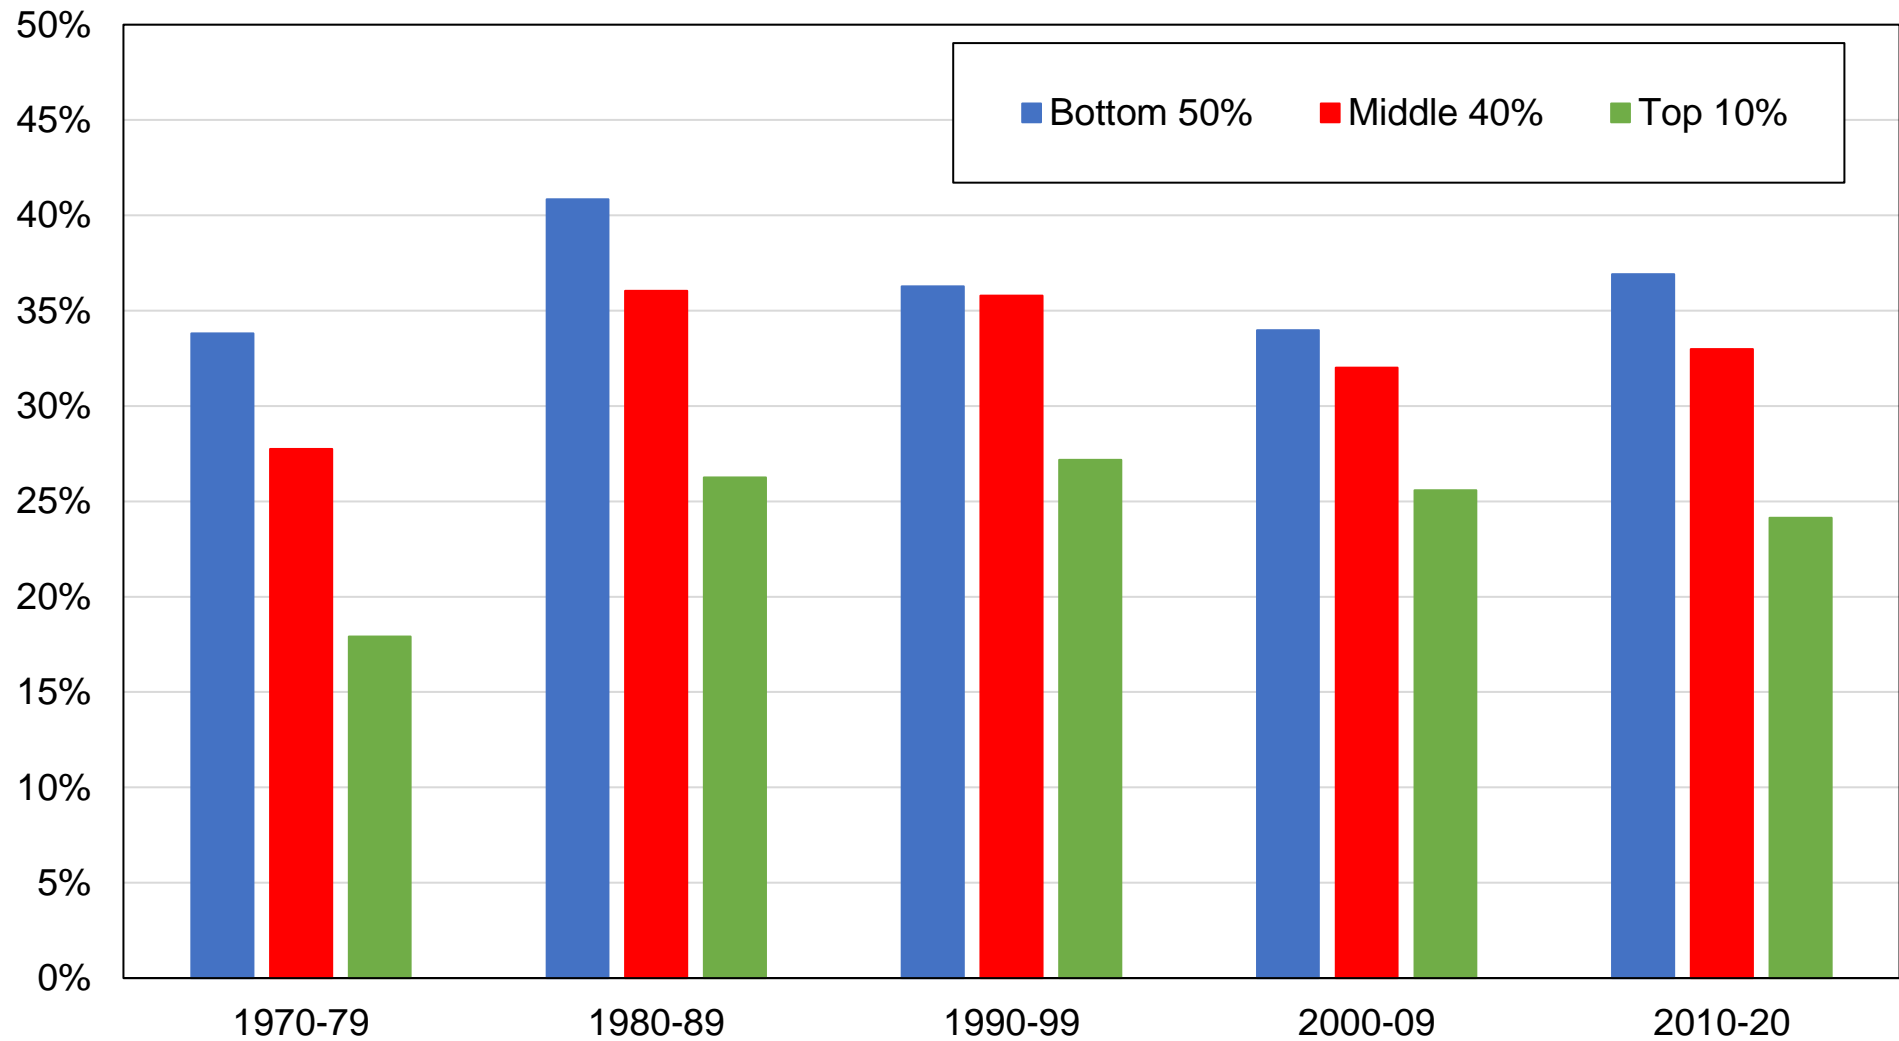

**Source:** authors' computations using Belgian political attitudes surveys.

**Note:** the figure shows the share of votes received by socialist and green parties by income group.

**Figure EB4 - Vote for Liberal / NDP / Green by income group in Canada**

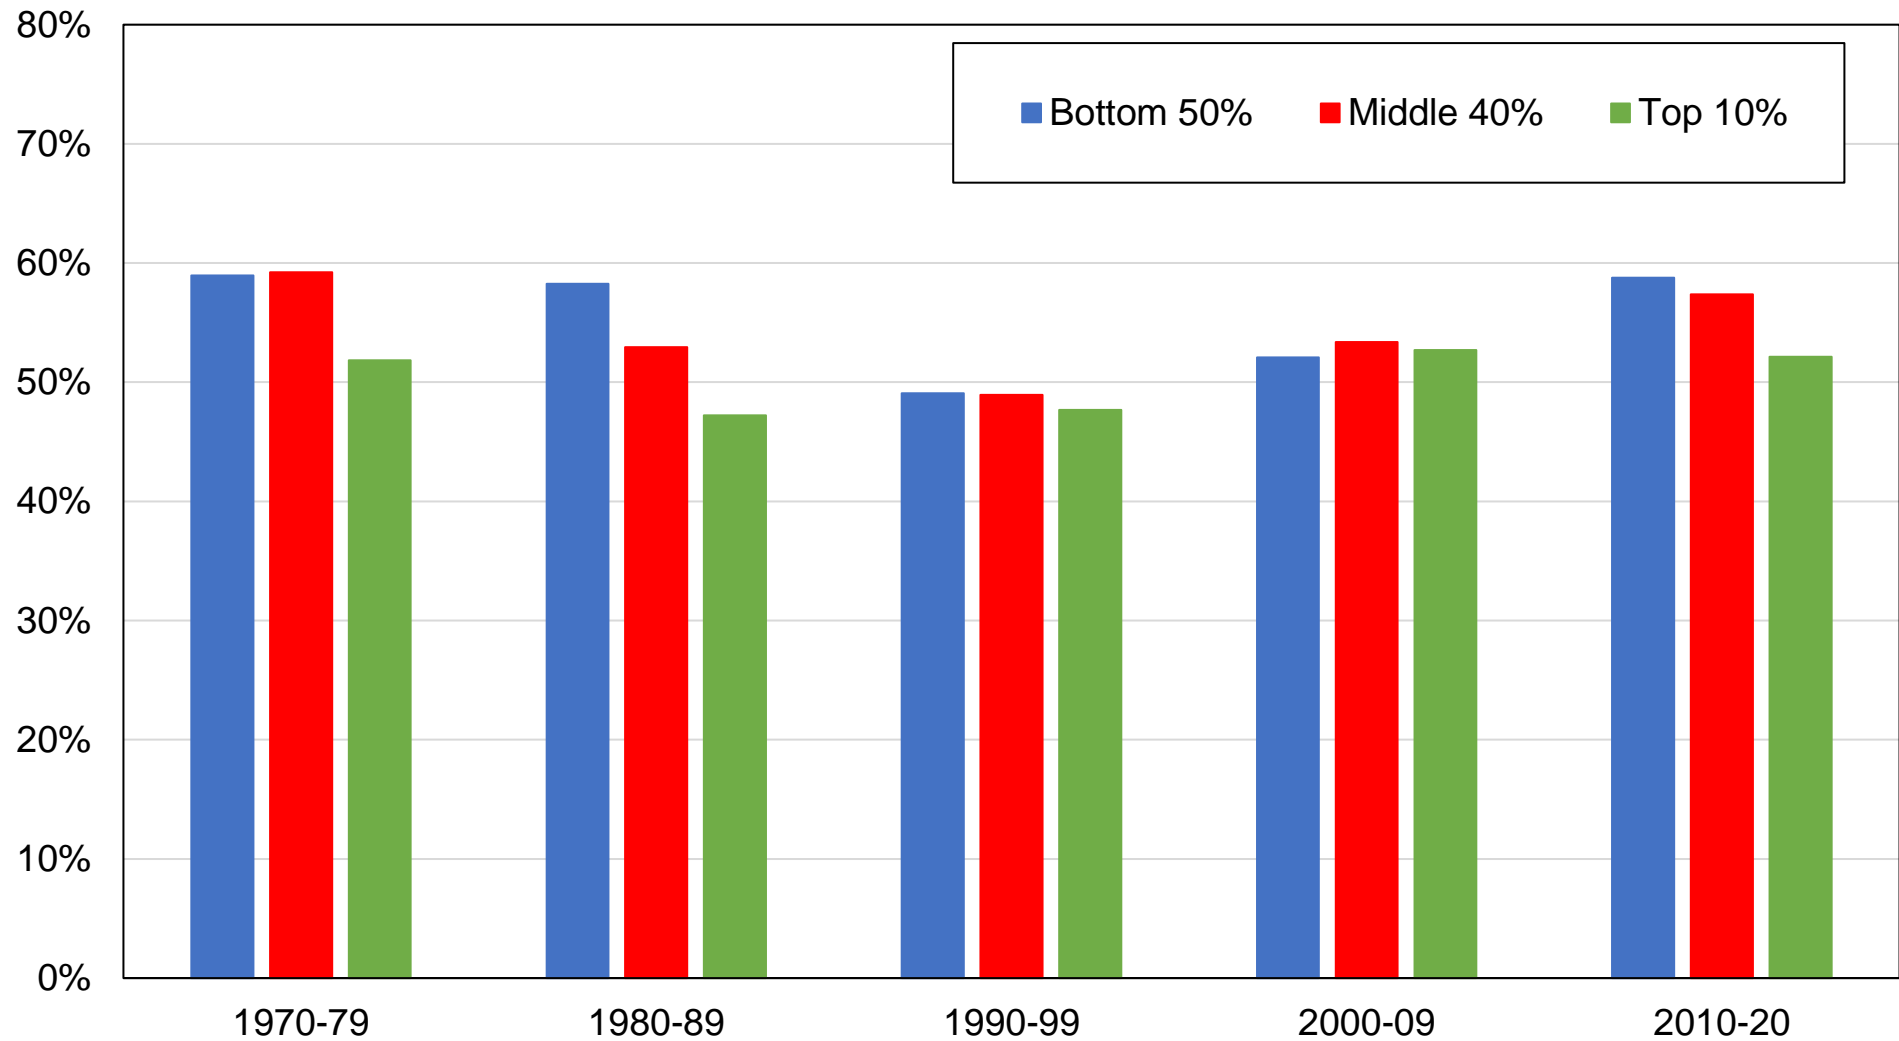

**Source:** authors' computations using Canadian election studies.

**Note:** the figure shows the share of votes received by the Liberal / NDP / Green parties by income group.

**Figure EB5 - Vote for Social Democratic Party / Socialist People's Party / Social Liberal Party / Red-Green Alliance by income group in Denmark**

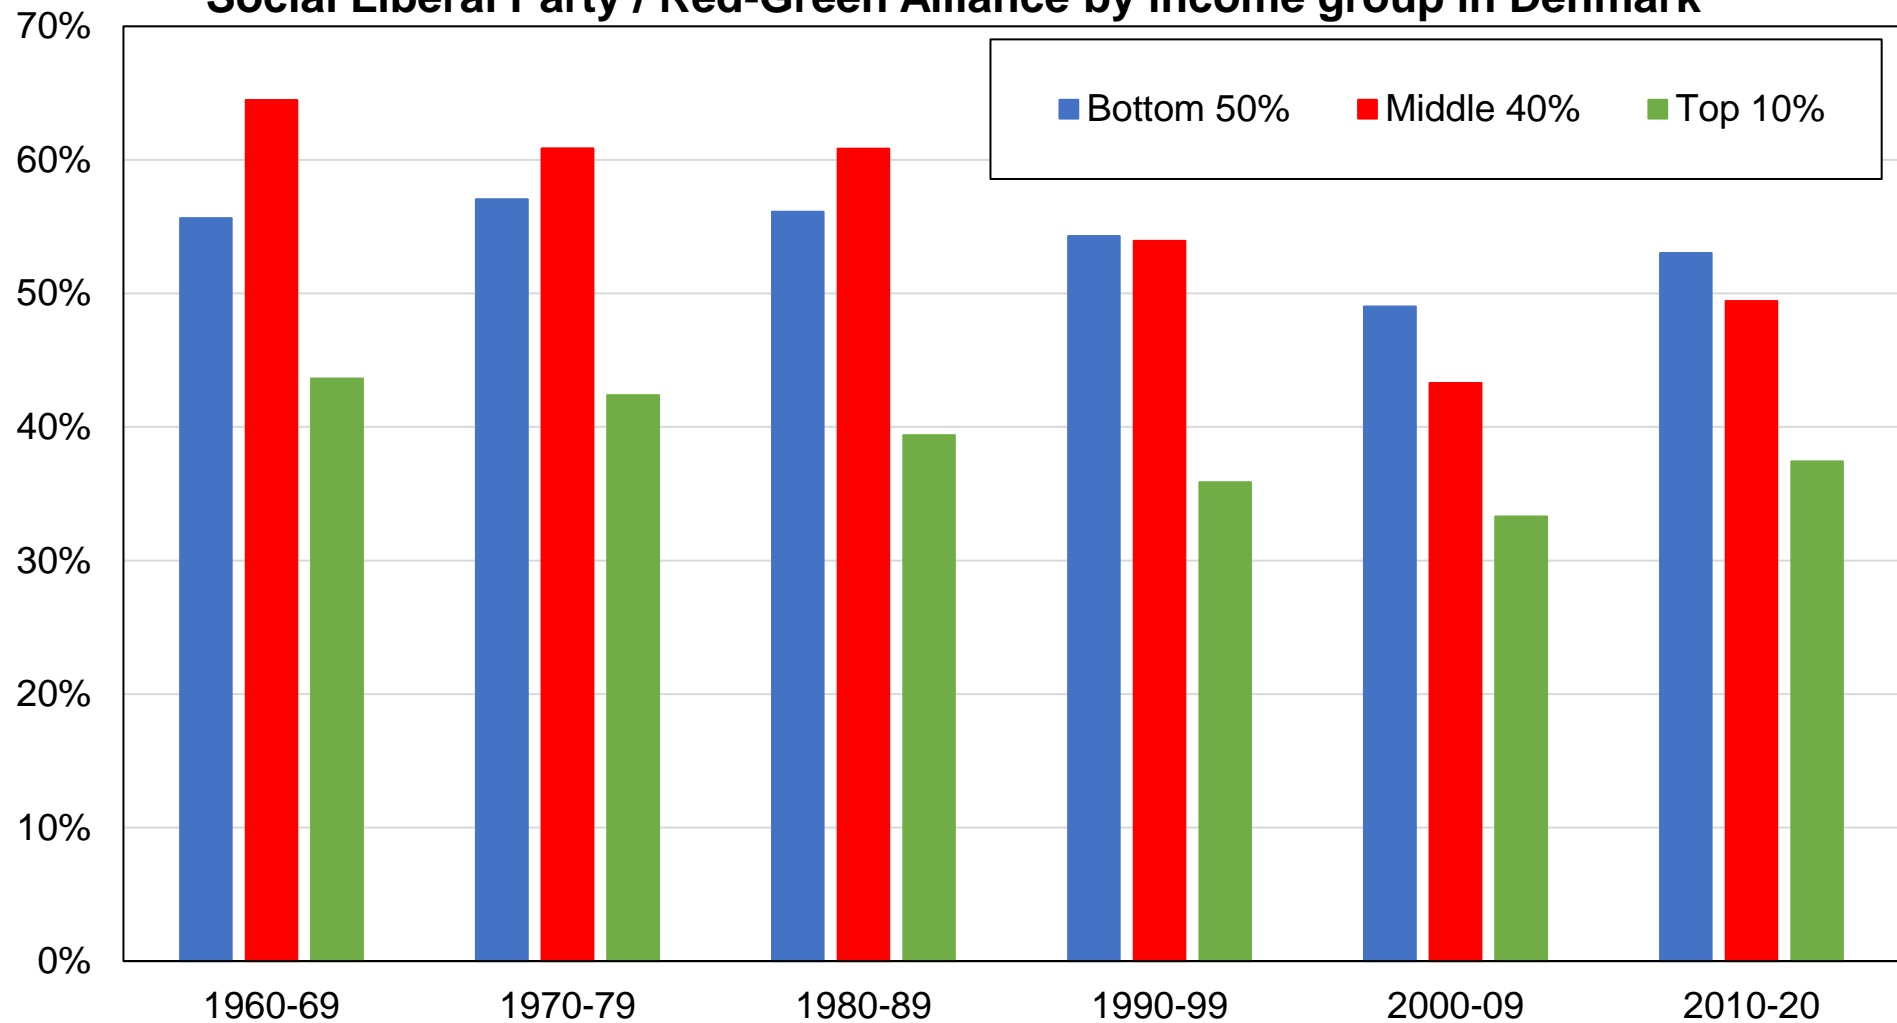

**Source:** authors' computations using Danish post-electoral surveys.

**Note:** the figure shows the share of votes received by Social Democratic Party / Socialist People's Party / Social Liberal Party / Red-Green Alliance by income group.

**Figure EB6 - Vote for Social Democratic Party / Finnish People's Democratic League / Left Alliance / Green League by income group in Finland**

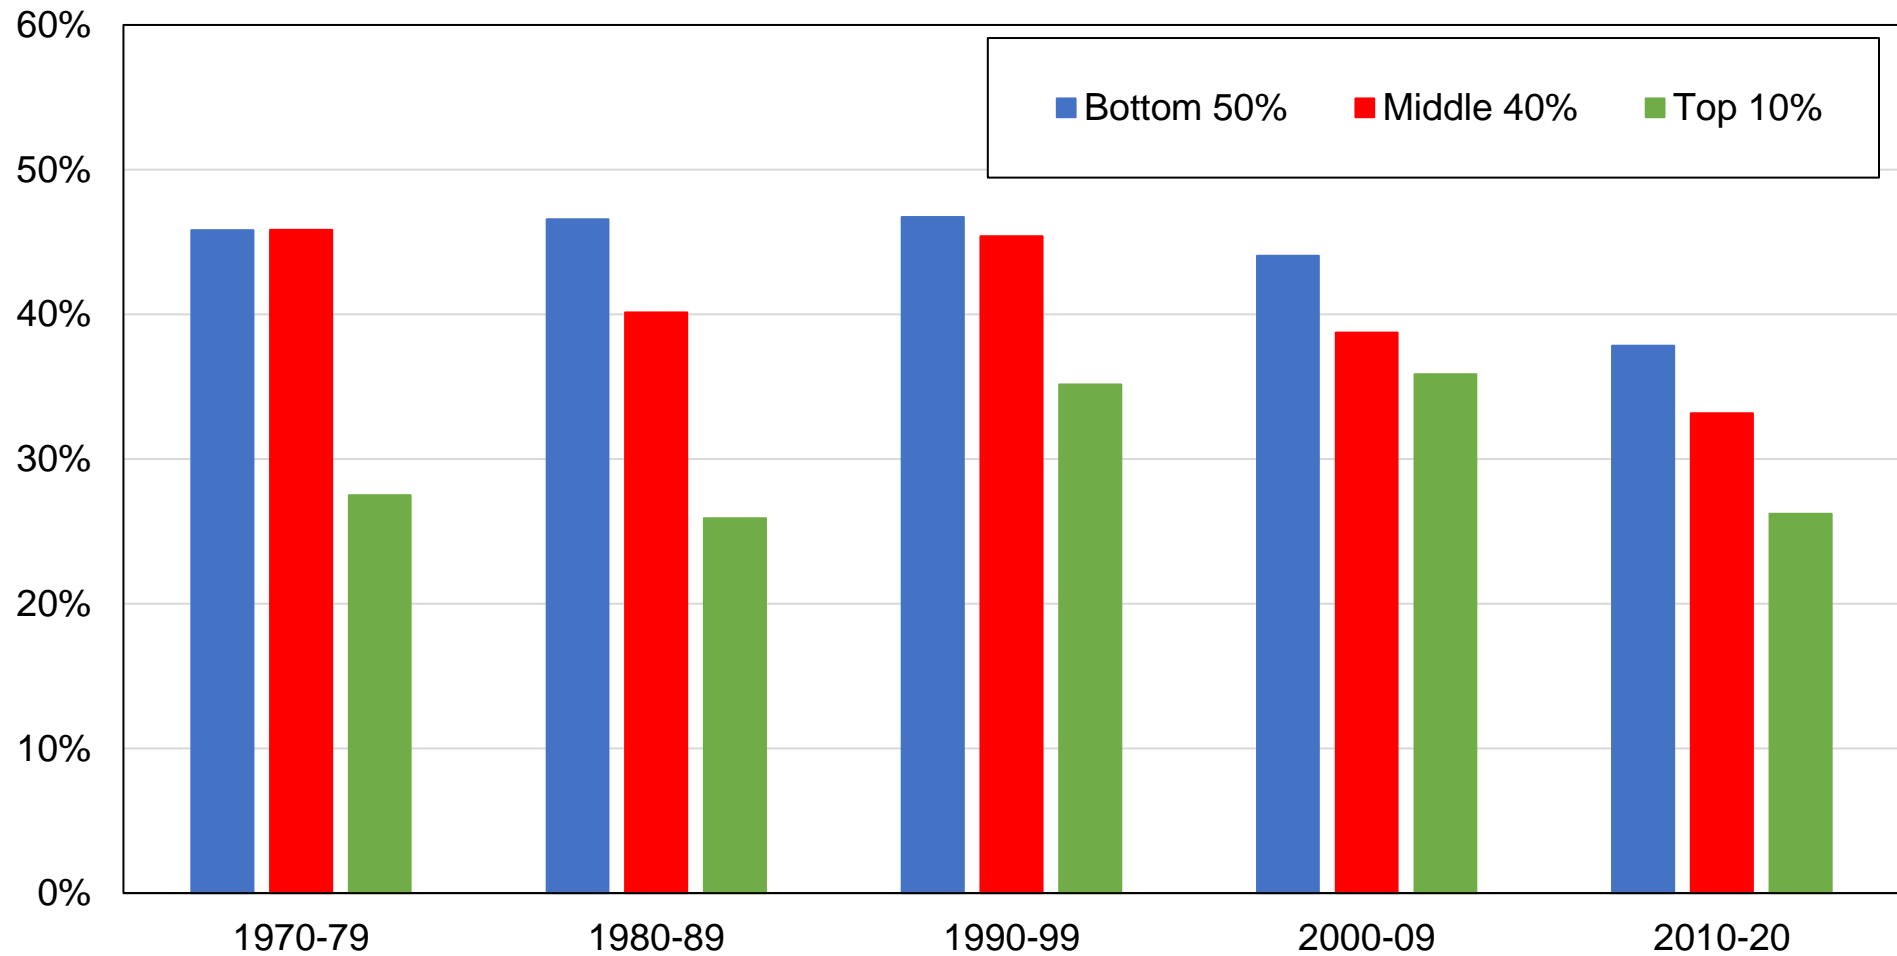

**Source:** authors' computations using Finnish electoral surveys.

**Note:** the figure shows the share of votes received by Social Democratic Party / Finnish People's Democratic League / Left Alliance / Green League by income group.

**Figure EB7 - Vote for PS / PCF / Radicaux / Other left by income group in France**

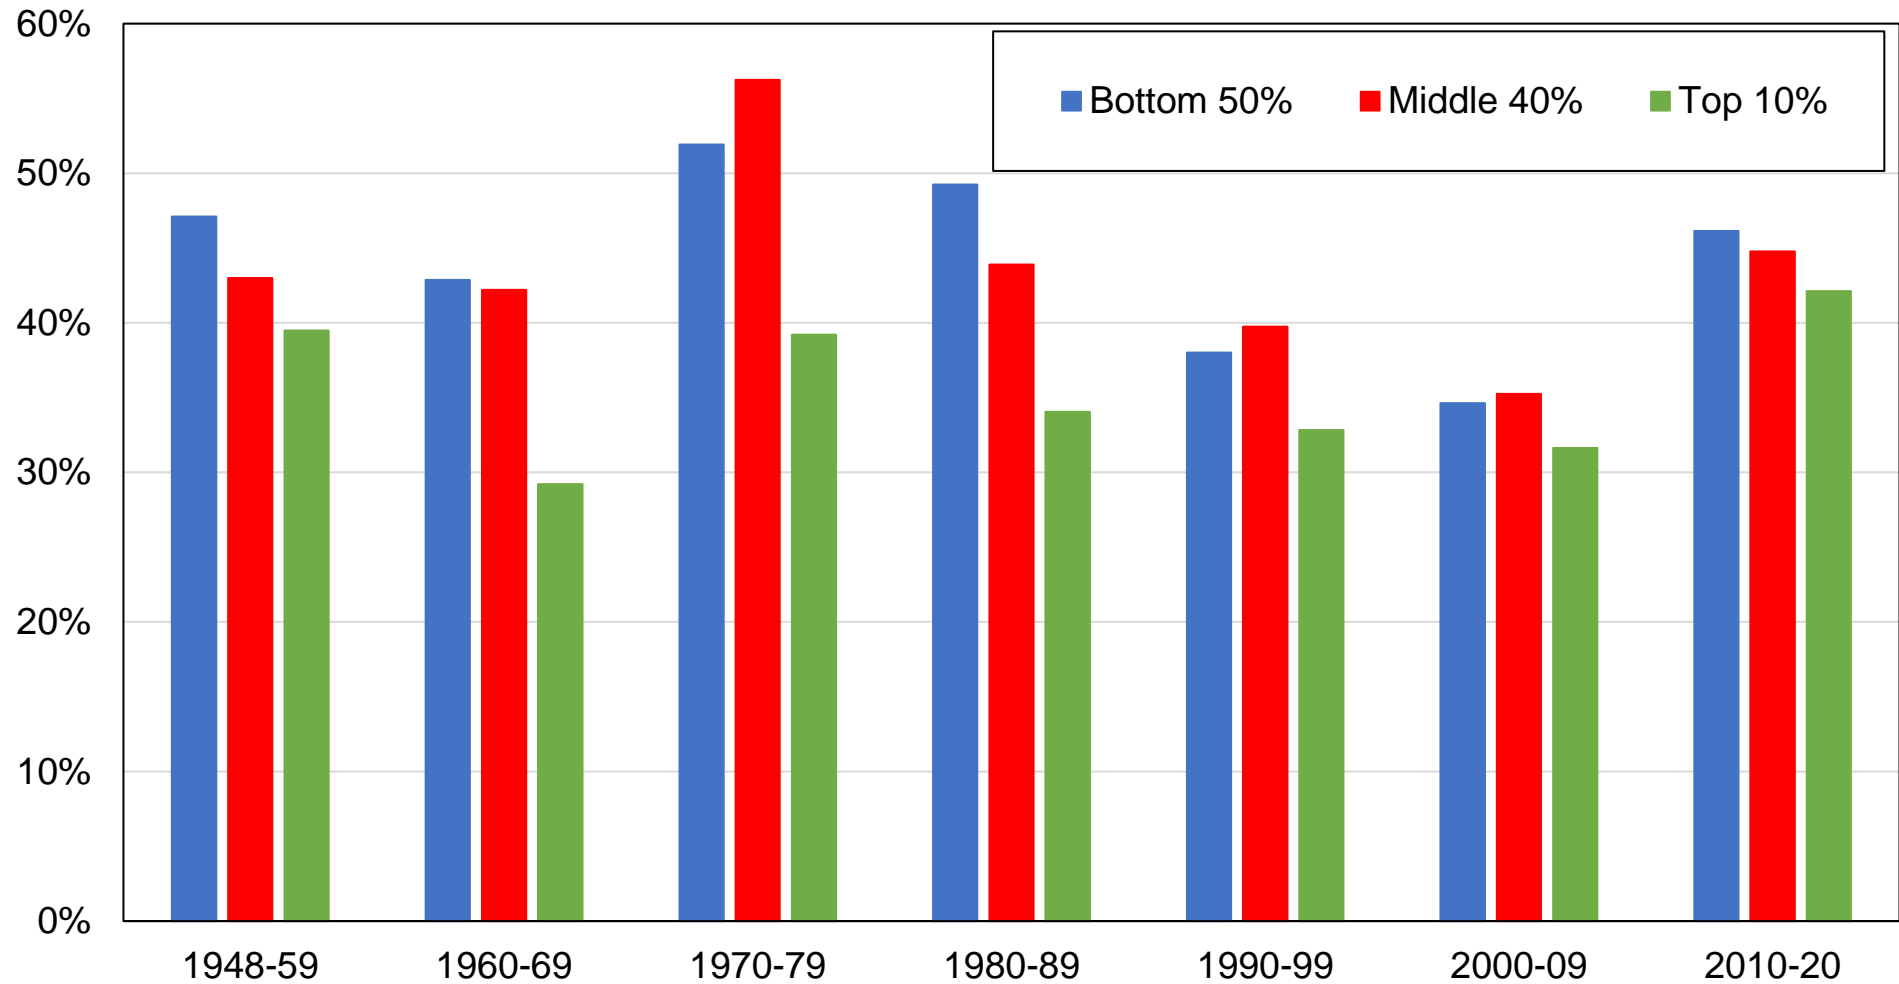

**Source:** authors' computations using French post-electoral surveys.

**Note:** the figure shows the share of votes received by the PS / PCF / Radicaux / Other left by income group.

**Figure EB8 - Vote for SPD / Die Grünen / Die Linke by income group in Germany**

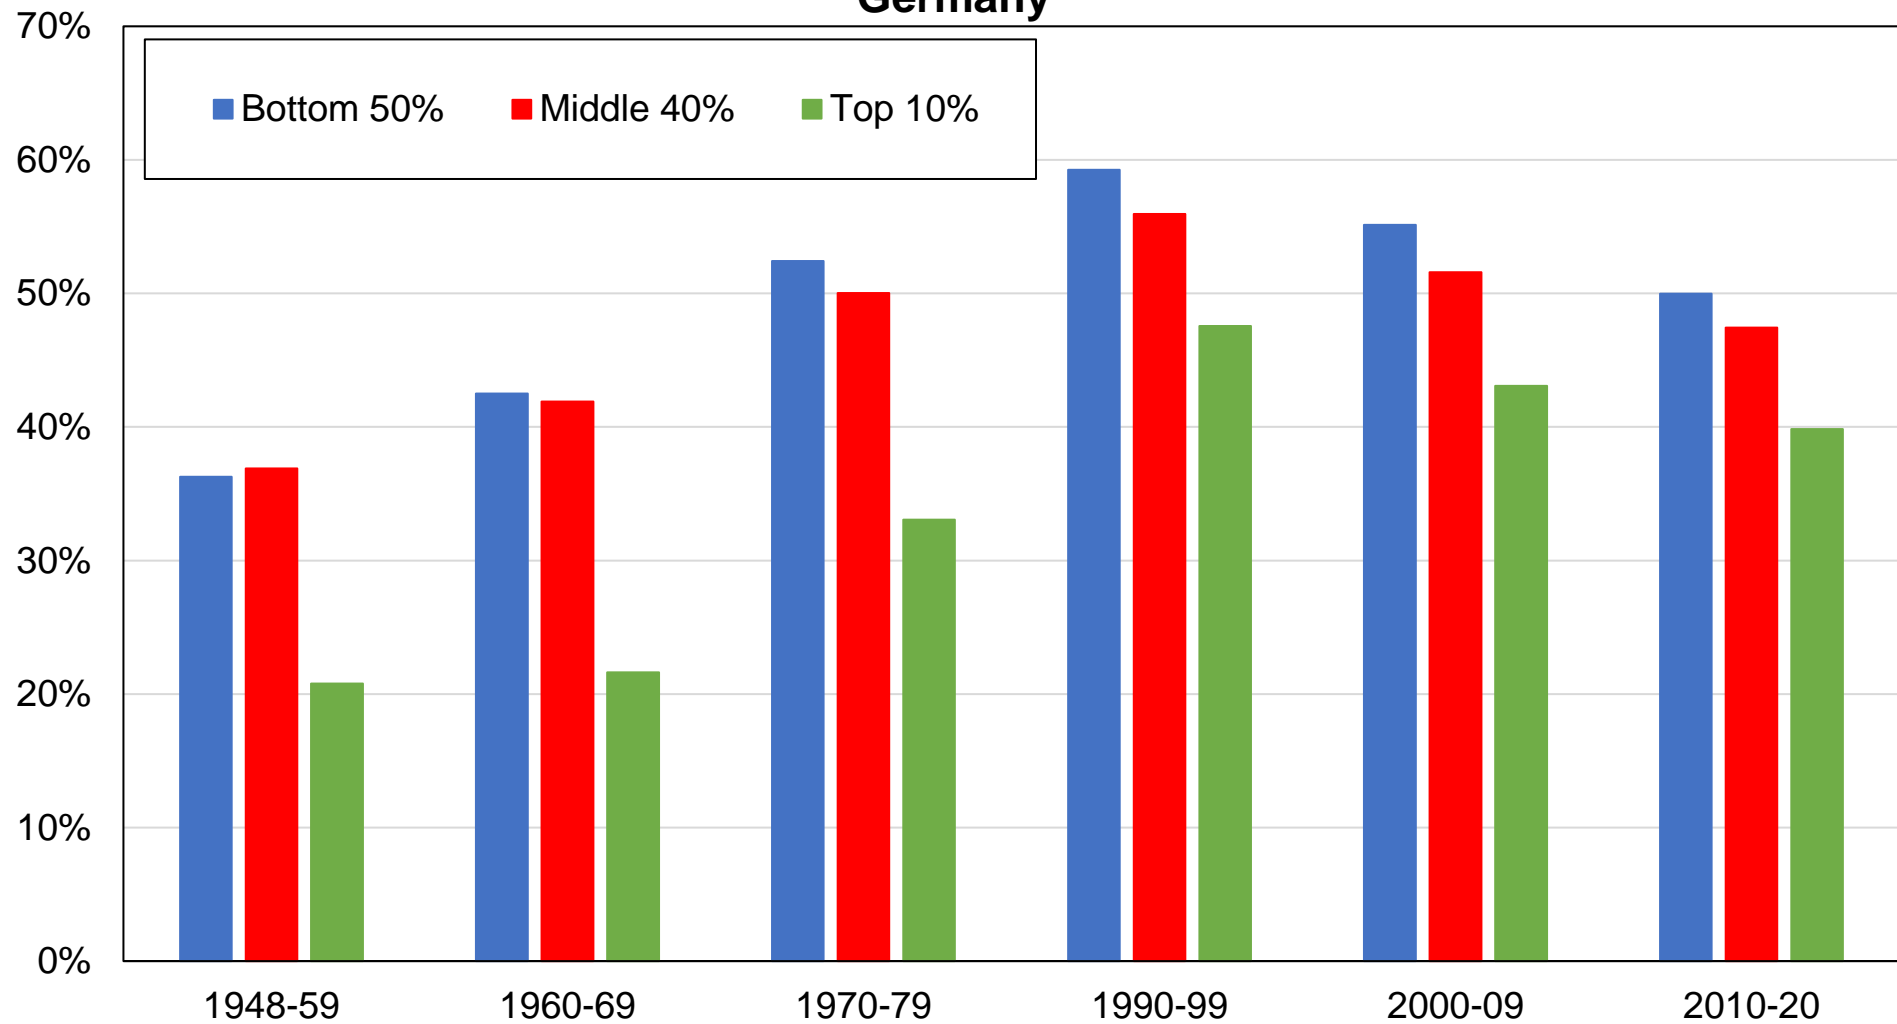

**Source:** authors' computations using German post-electoral surveys.

**Note:** the figure shows the share of votes received by the SPD / Die Grünen / Die Linke by income group.

**Figure EB9 - Vote for Social Democratic Alliance / Left-Green movement  
by income group in Iceland**

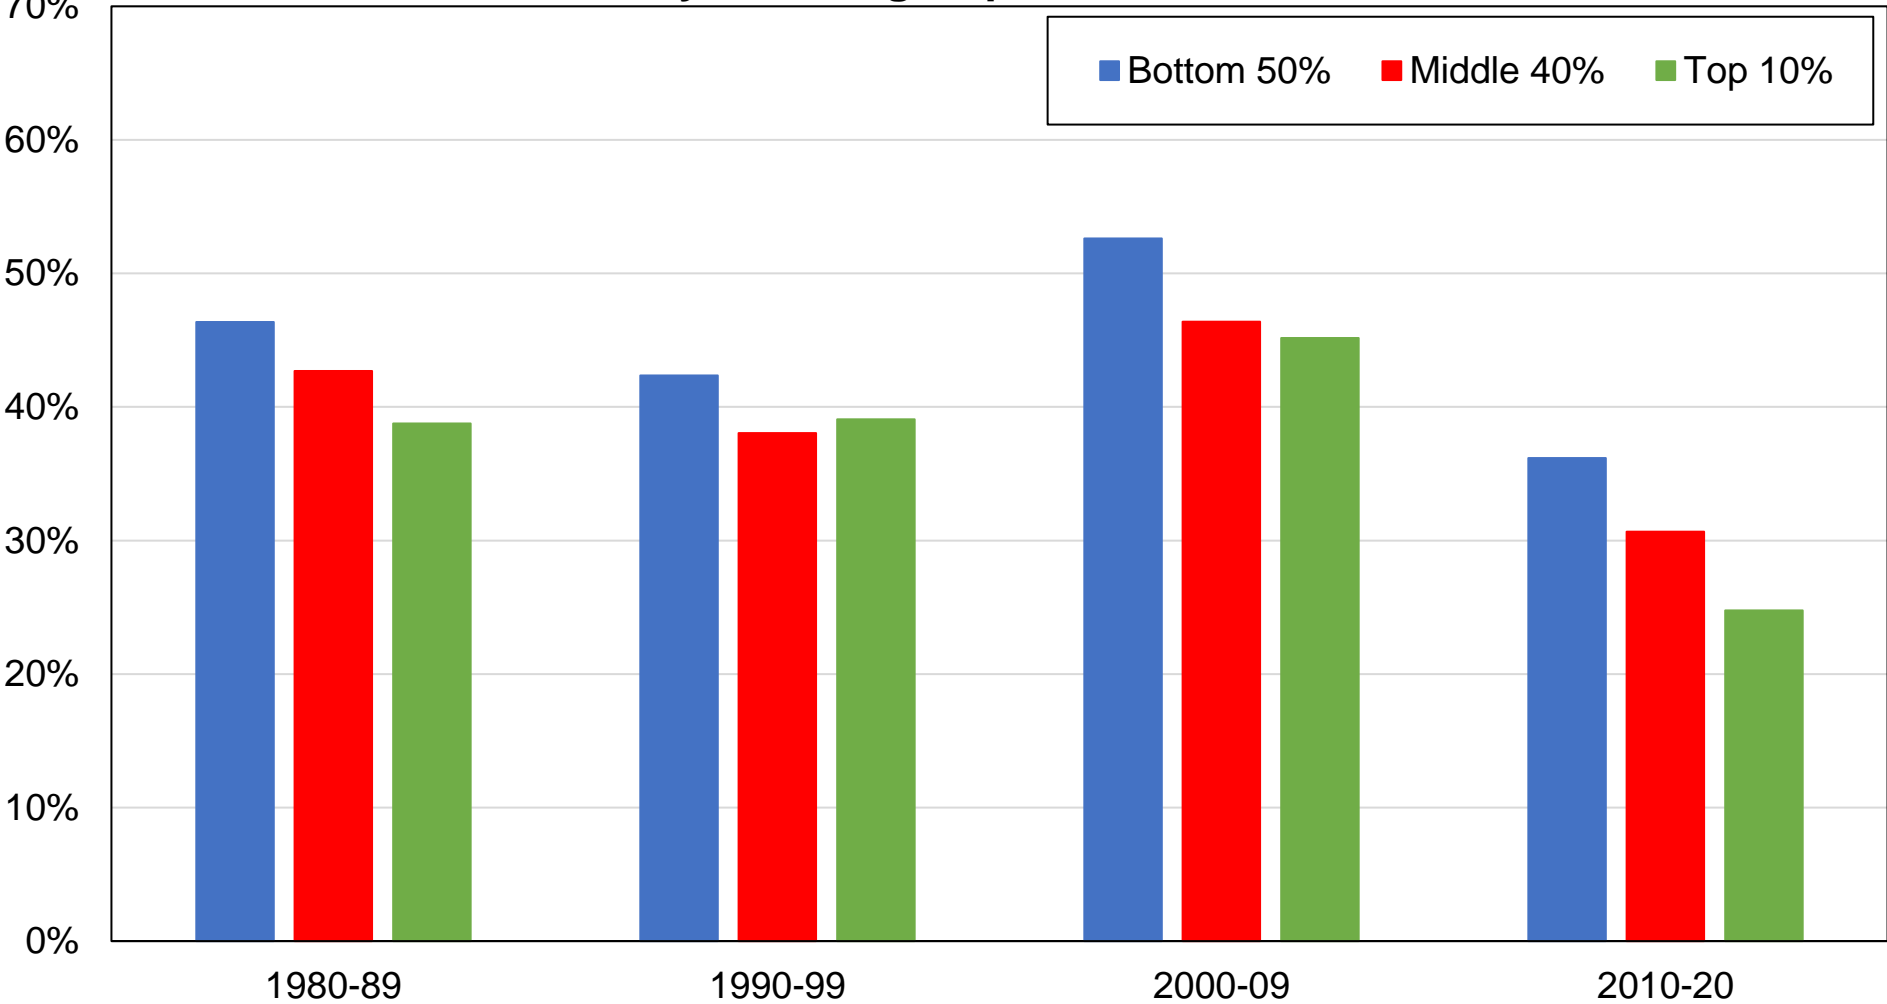

**Source:** authors' computations using Icelandic post-electoral surveys.

**Note:** the figure shows the share of votes received by left-wing parties by income group.



**Figure EB10 - Vote for Fianna Fáil / Sinn Féin / Labour / Other left by income group in Ireland**

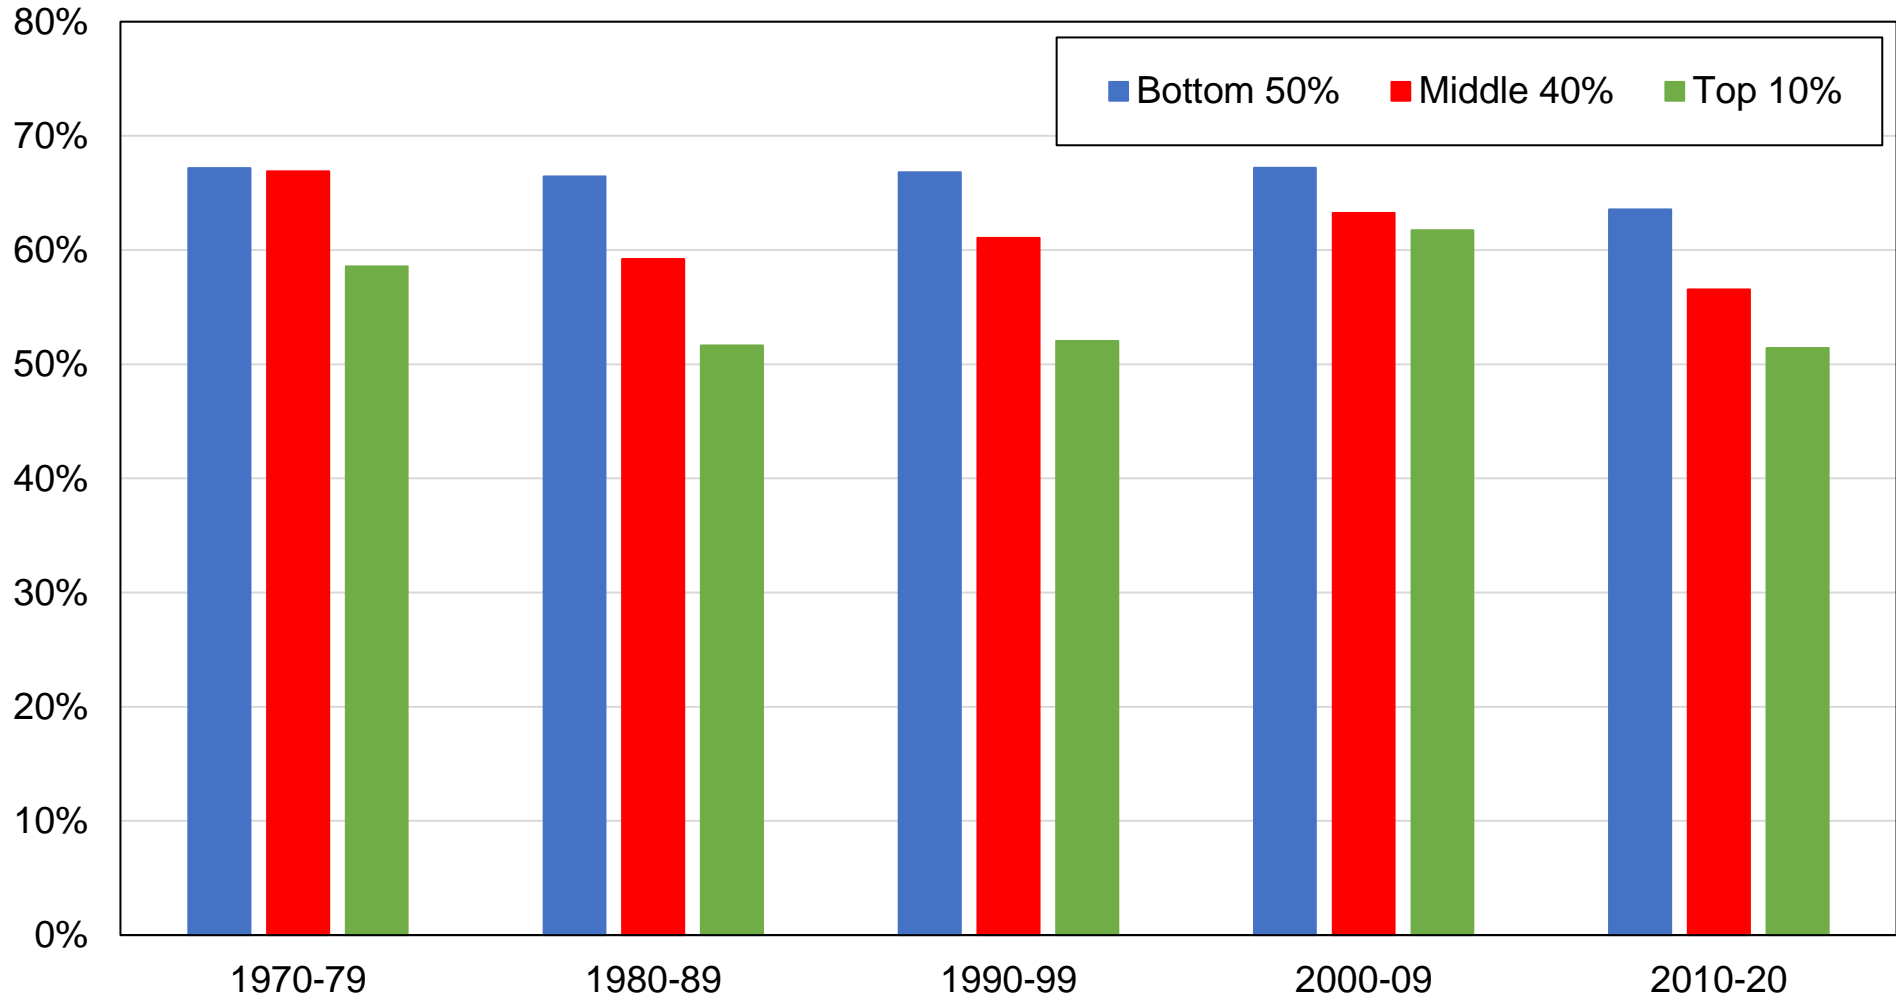

**Source:** authors' computations using Irish political attitudes surveys.

**Note:** the figure shows the share of votes received by Fianna Fáil and left-wing parties by income group.

**Figure EB11 - Vote for Social Democrats / Socialists / Communists / Greens by income group in Italy**

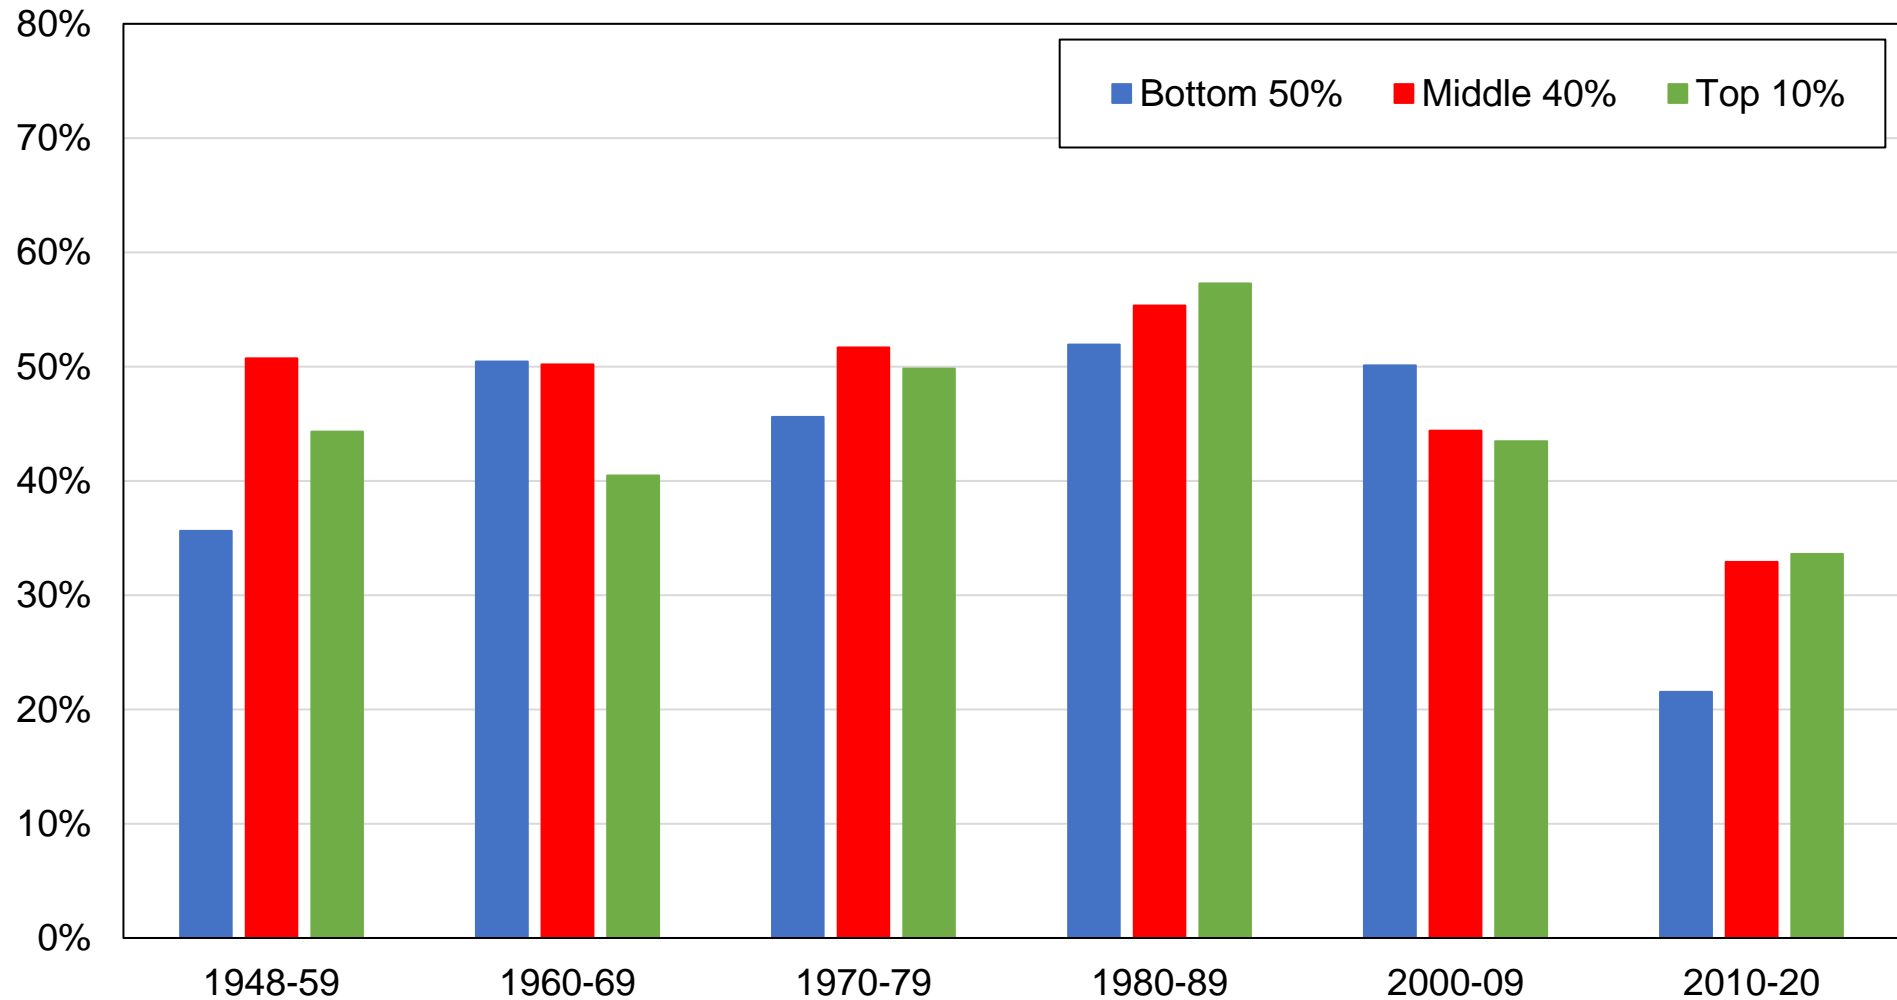

**Source:** authors' computations using Italian political attitudes surveys.

**Note:** the figure shows the share of votes received by left-wing parties by income group.

**Figure EB12 - Vote for LSAP / Greens / Other left by income group in Luxembourg**

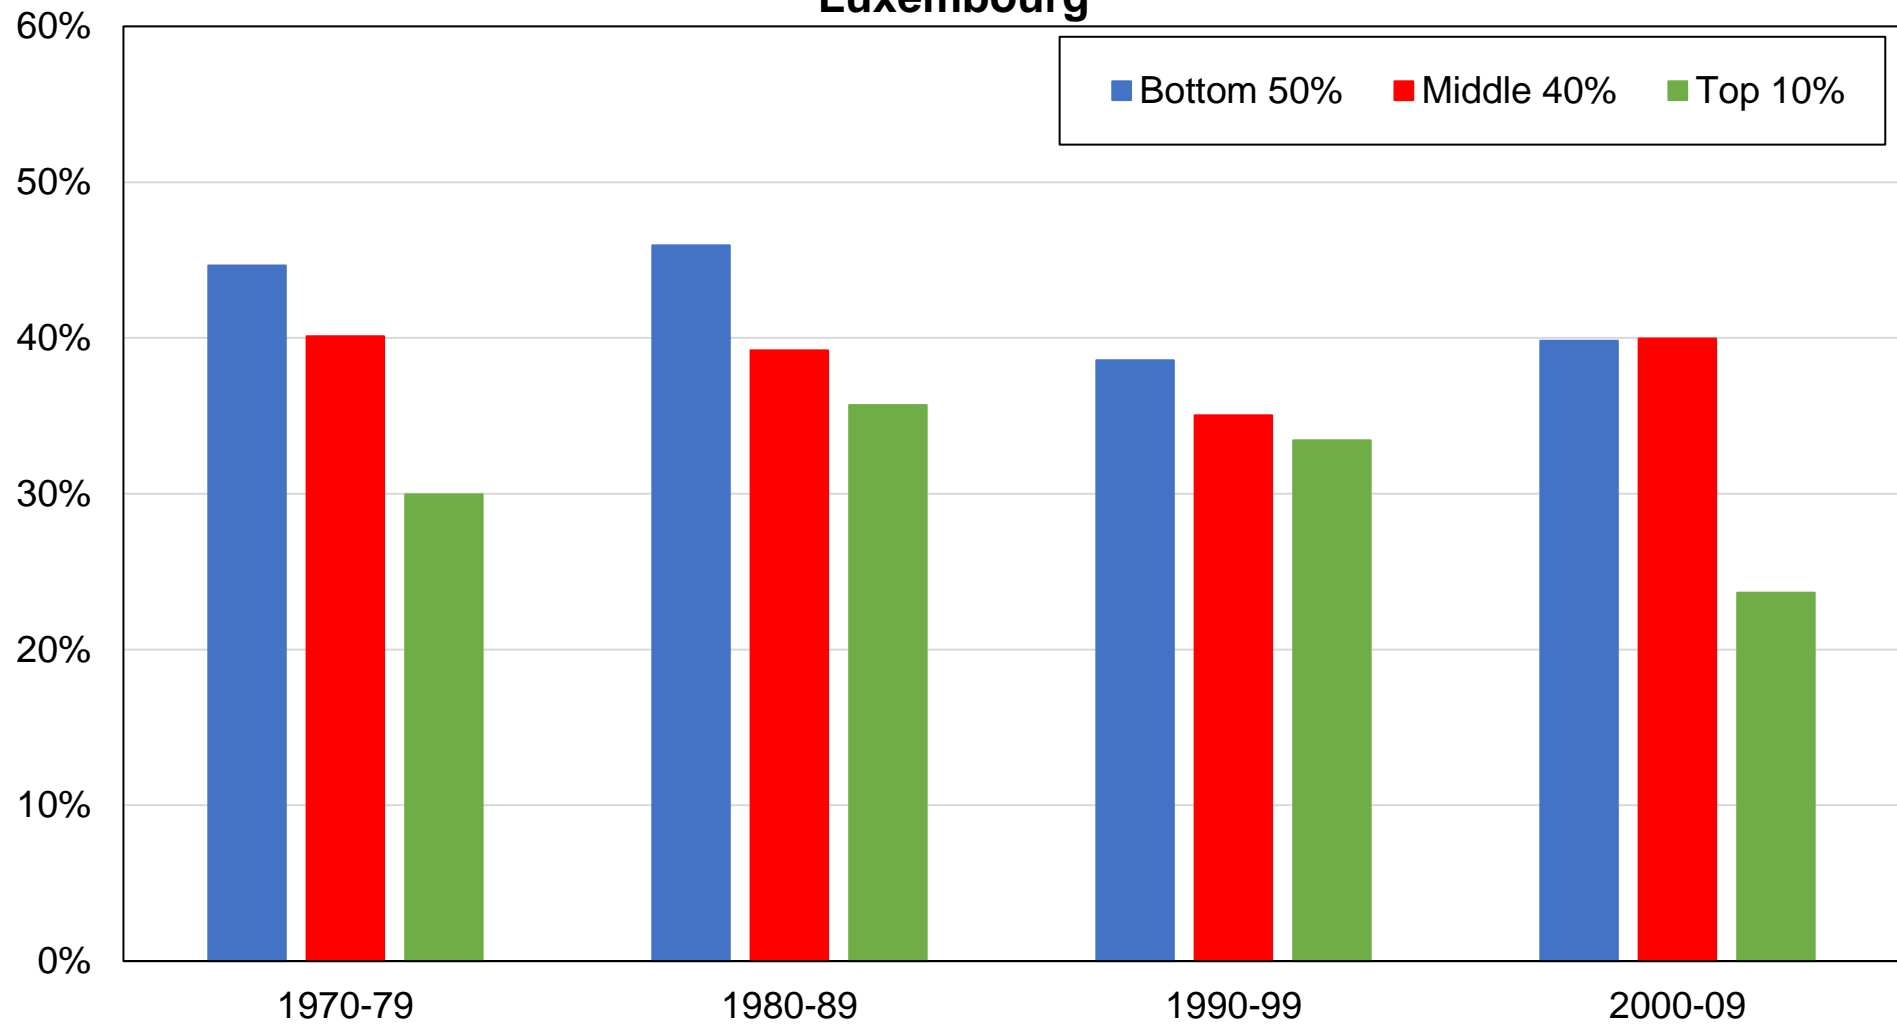

**Source:** authors' computations using Luxembourg political attitudes surveys.

**Note:** the figure shows the share of votes received by LSAP / Greens / Other left by income group.

**Figure EB13 - Vote for PvdA / D66 / Greens / Other left by income group in the Netherlands**

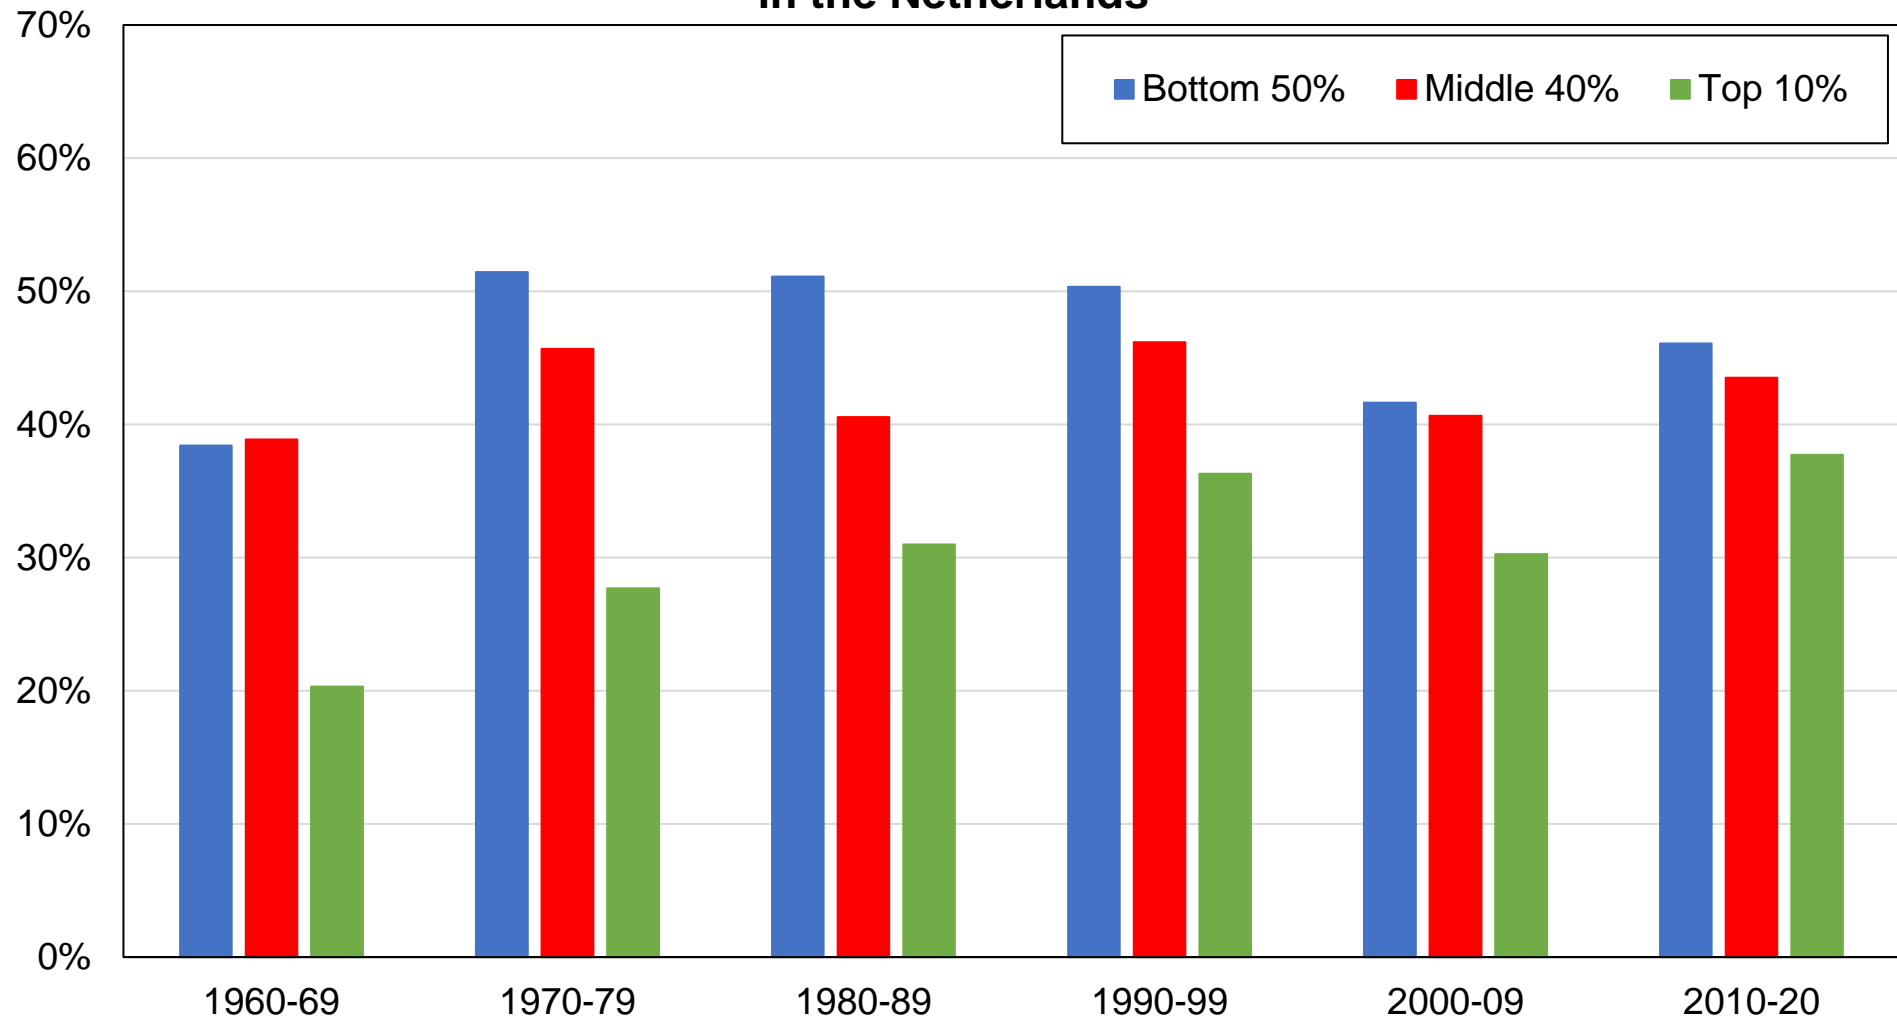

**Source:** authors' computations using Dutch political attitudes surveys.

**Note:** the figure shows the share of votes received by PvdA / D66 / Greens / Other left by income group.

**Figure EB14 - Vote for Labour / Greens / Other left by income group in New Zealand**

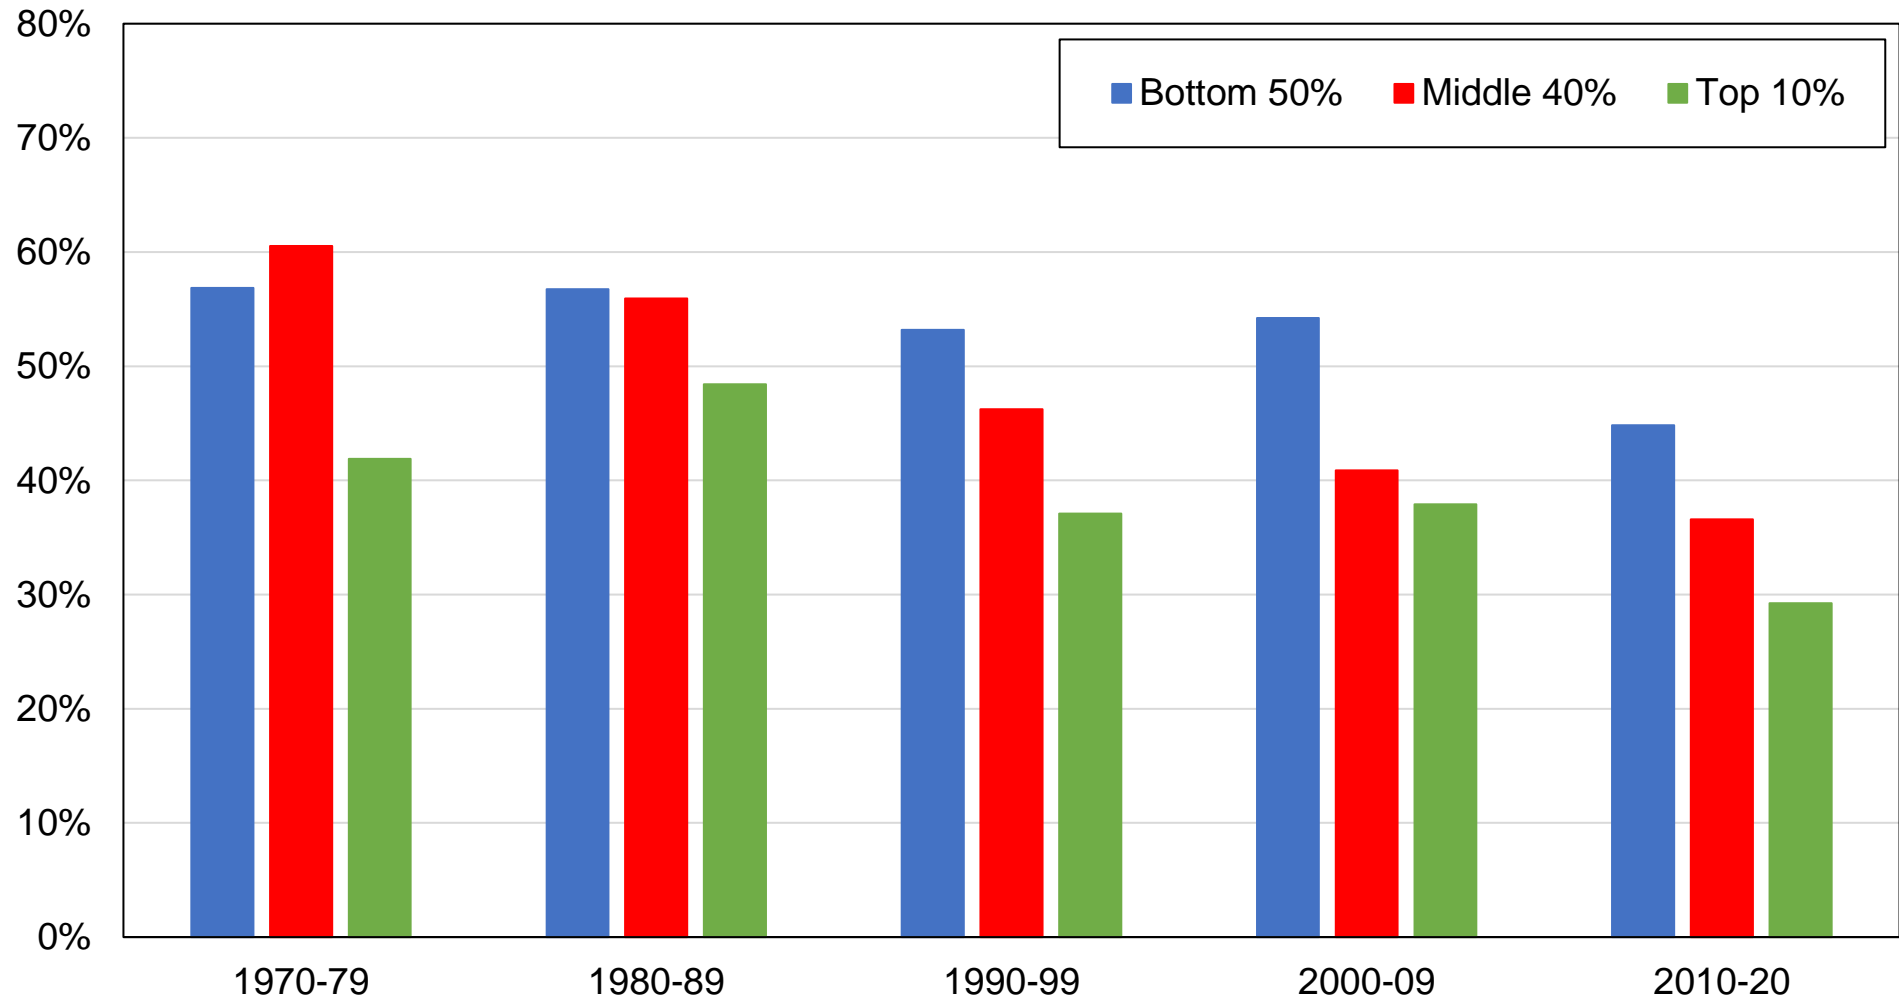

**Source:** authors' computations using New Zealand political attitudes surveys.

**Note:** the figure shows the share of votes received by left-wing parties by income group.

**Figure EB15 - Vote for Labour Party / Socialist Left Party / Other left  
by income group in Norway**

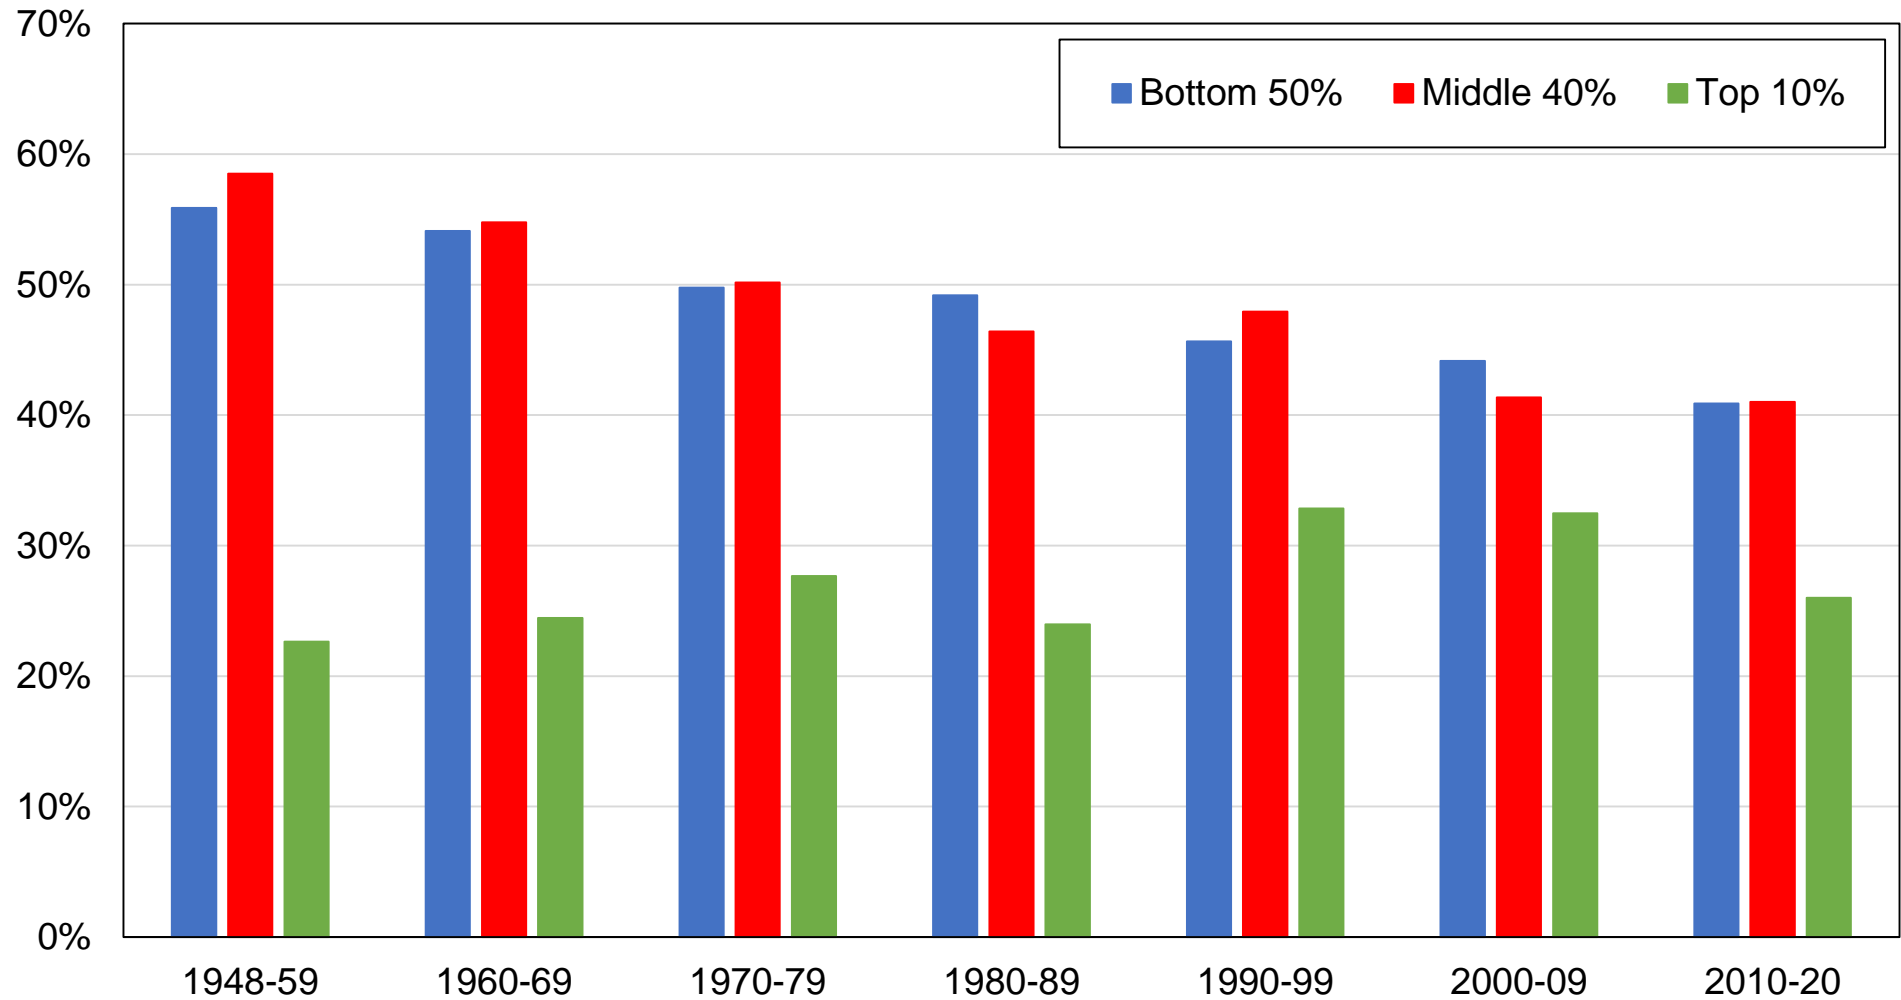

**Source:** authors' computations using Norwegian post-electoral surveys.

**Note:** the figure shows the share of votes received by Labour Party / Socialist Left Party / Other left by income group.

**Figure EB16 - Vote for Socialists / Communists / Greens / Left bloc  
by income group in Portugal**

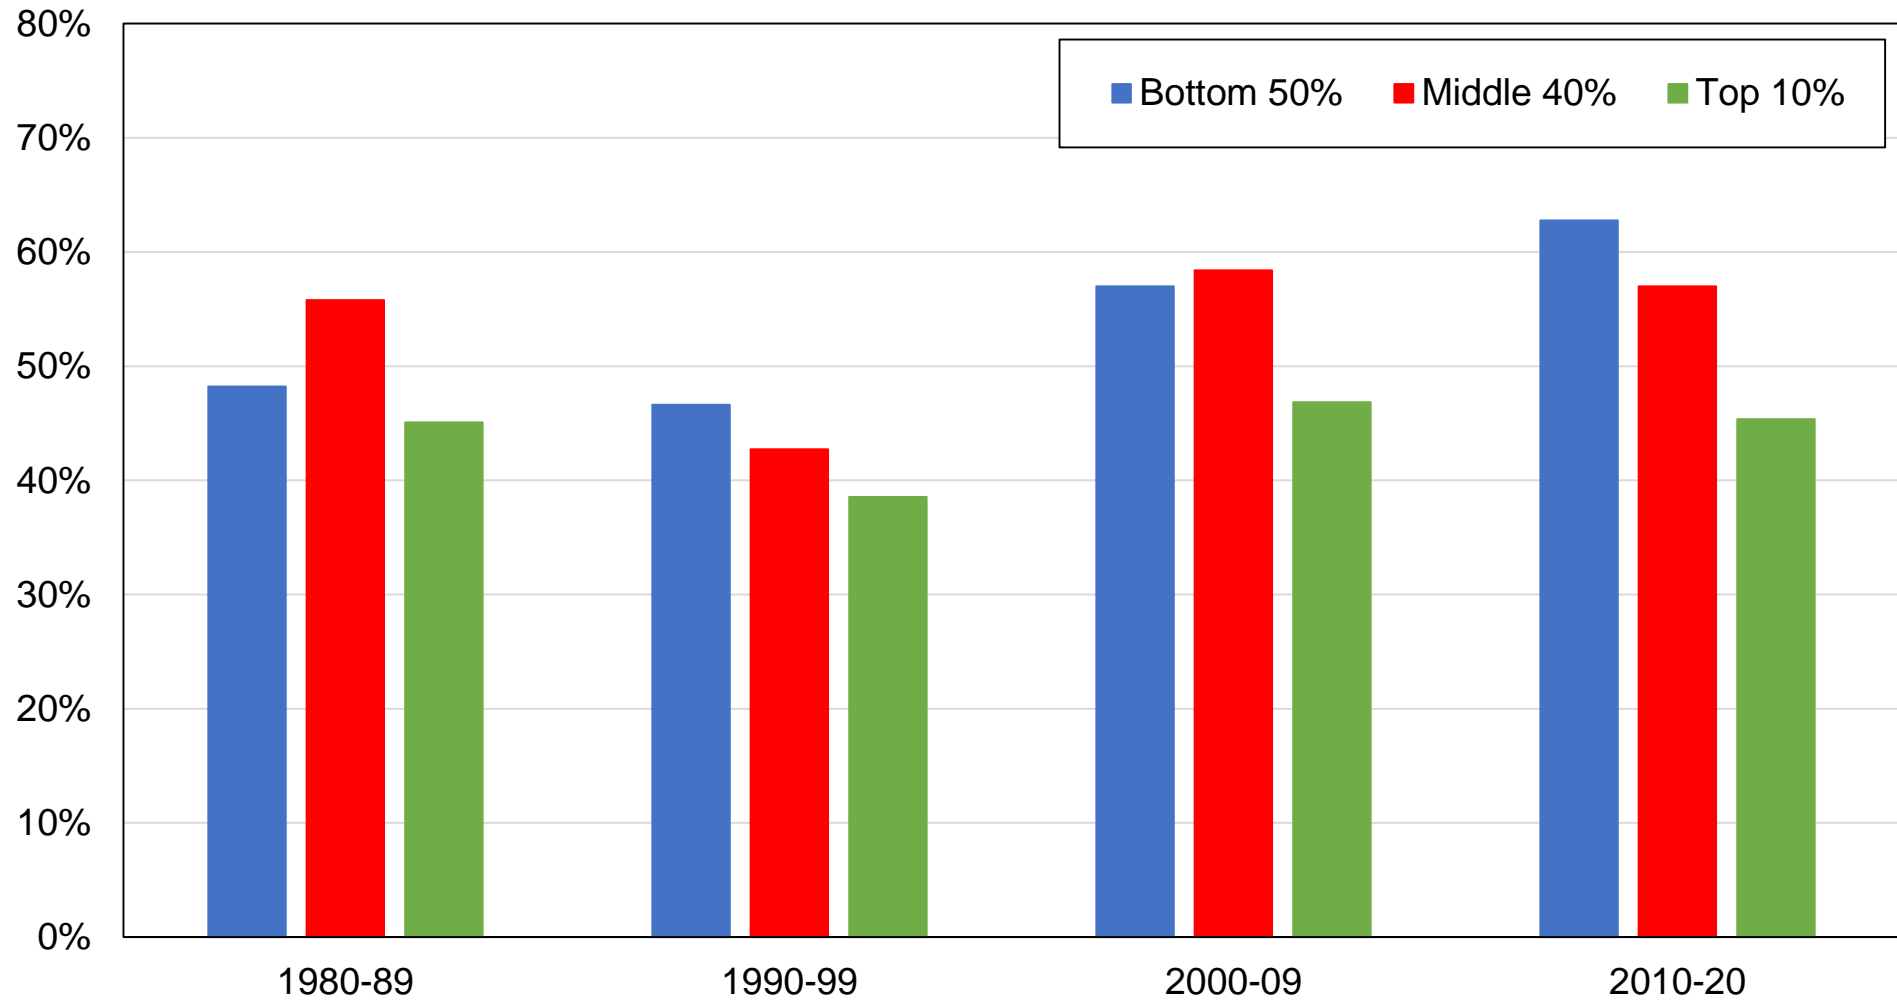

**Source:** authors' computations using Portuguese political attitudes surveys.

**Note:** the figure shows the share of votes received by left-wing parties by income group.

**Figure EB17 - Vote for PSOE / Podemos / IU / Other left by income group in Spain**

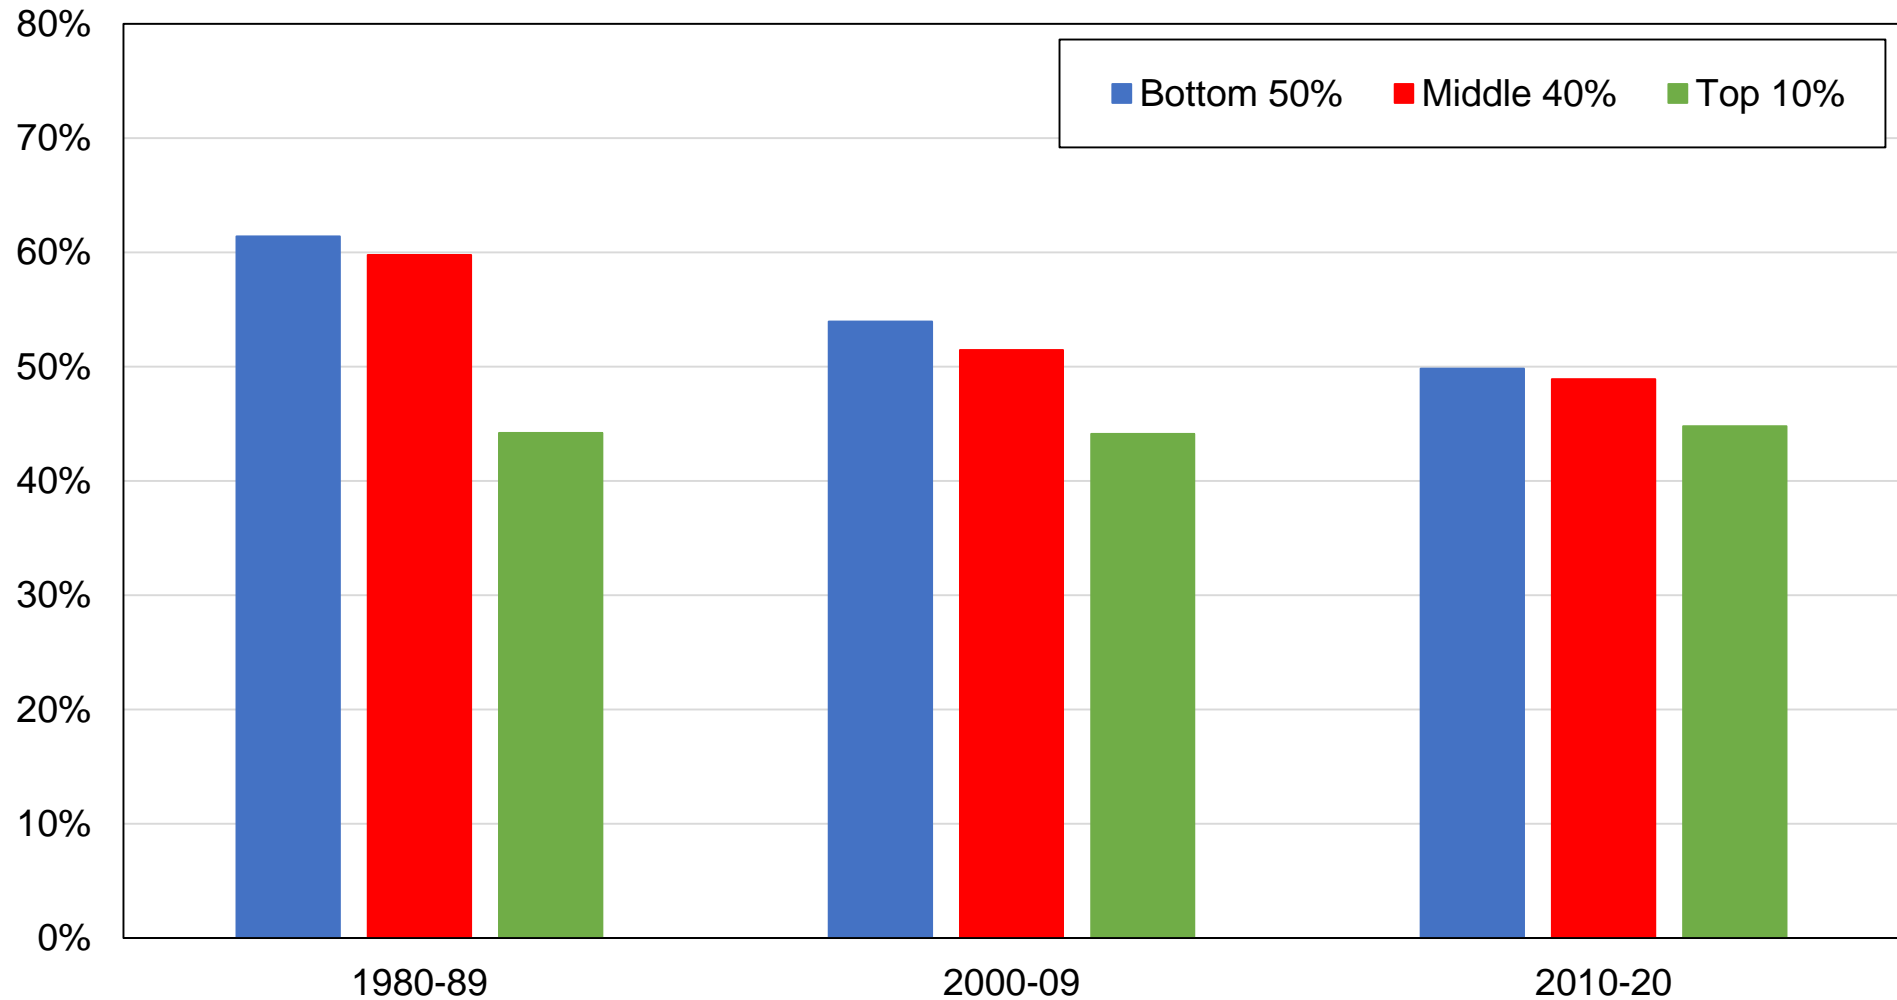

**Source:** authors' computations using Spanish political attitudes surveys.

**Note:** the figure shows the share of votes received by left-wing parties by income group. In the 1993-2000 decade, income is only available in 2000.



**Figure EB18 - Vote for Social Democratic Party / Left Party / Green Party  
by income group in Sweden**

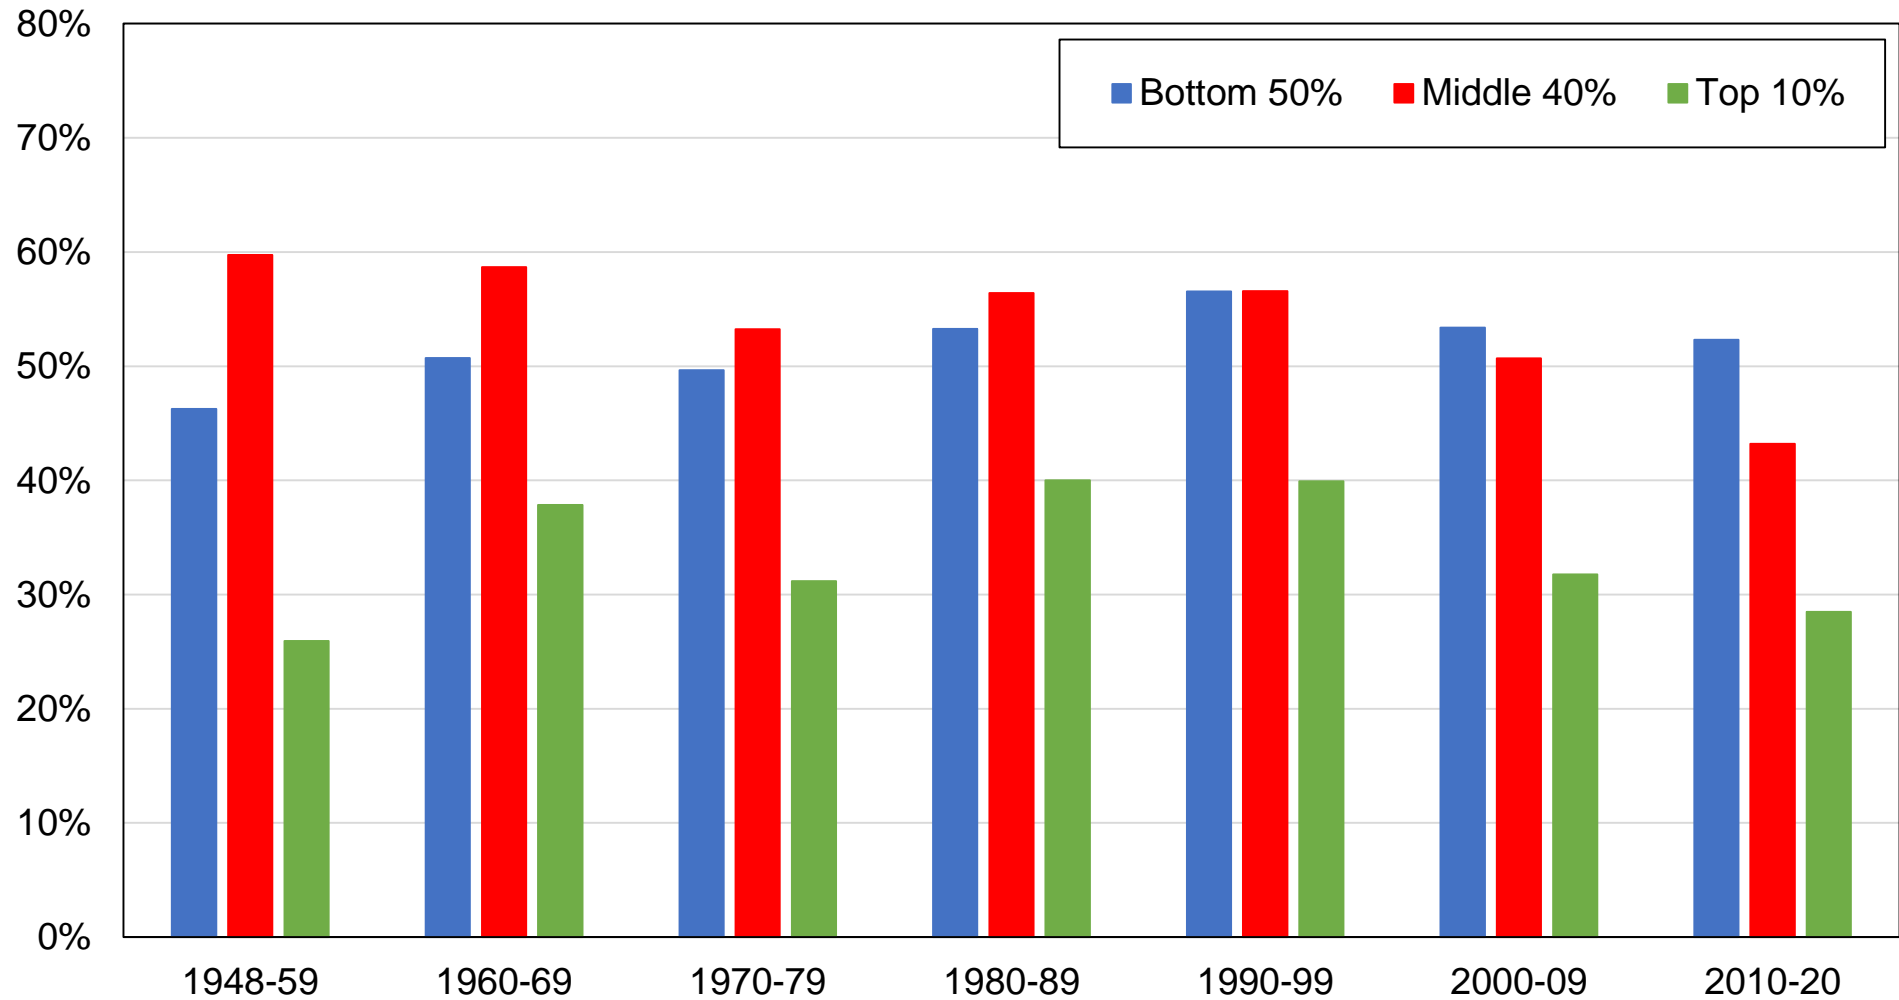

**Source:** authors' computations using Swedish electoral surveys.

**Note:** the figure shows the share of votes received by left-wing parties by income group.

**Figure EB19 - Vote for Social Democrats / Greens / Other left by income group in Switzerland**

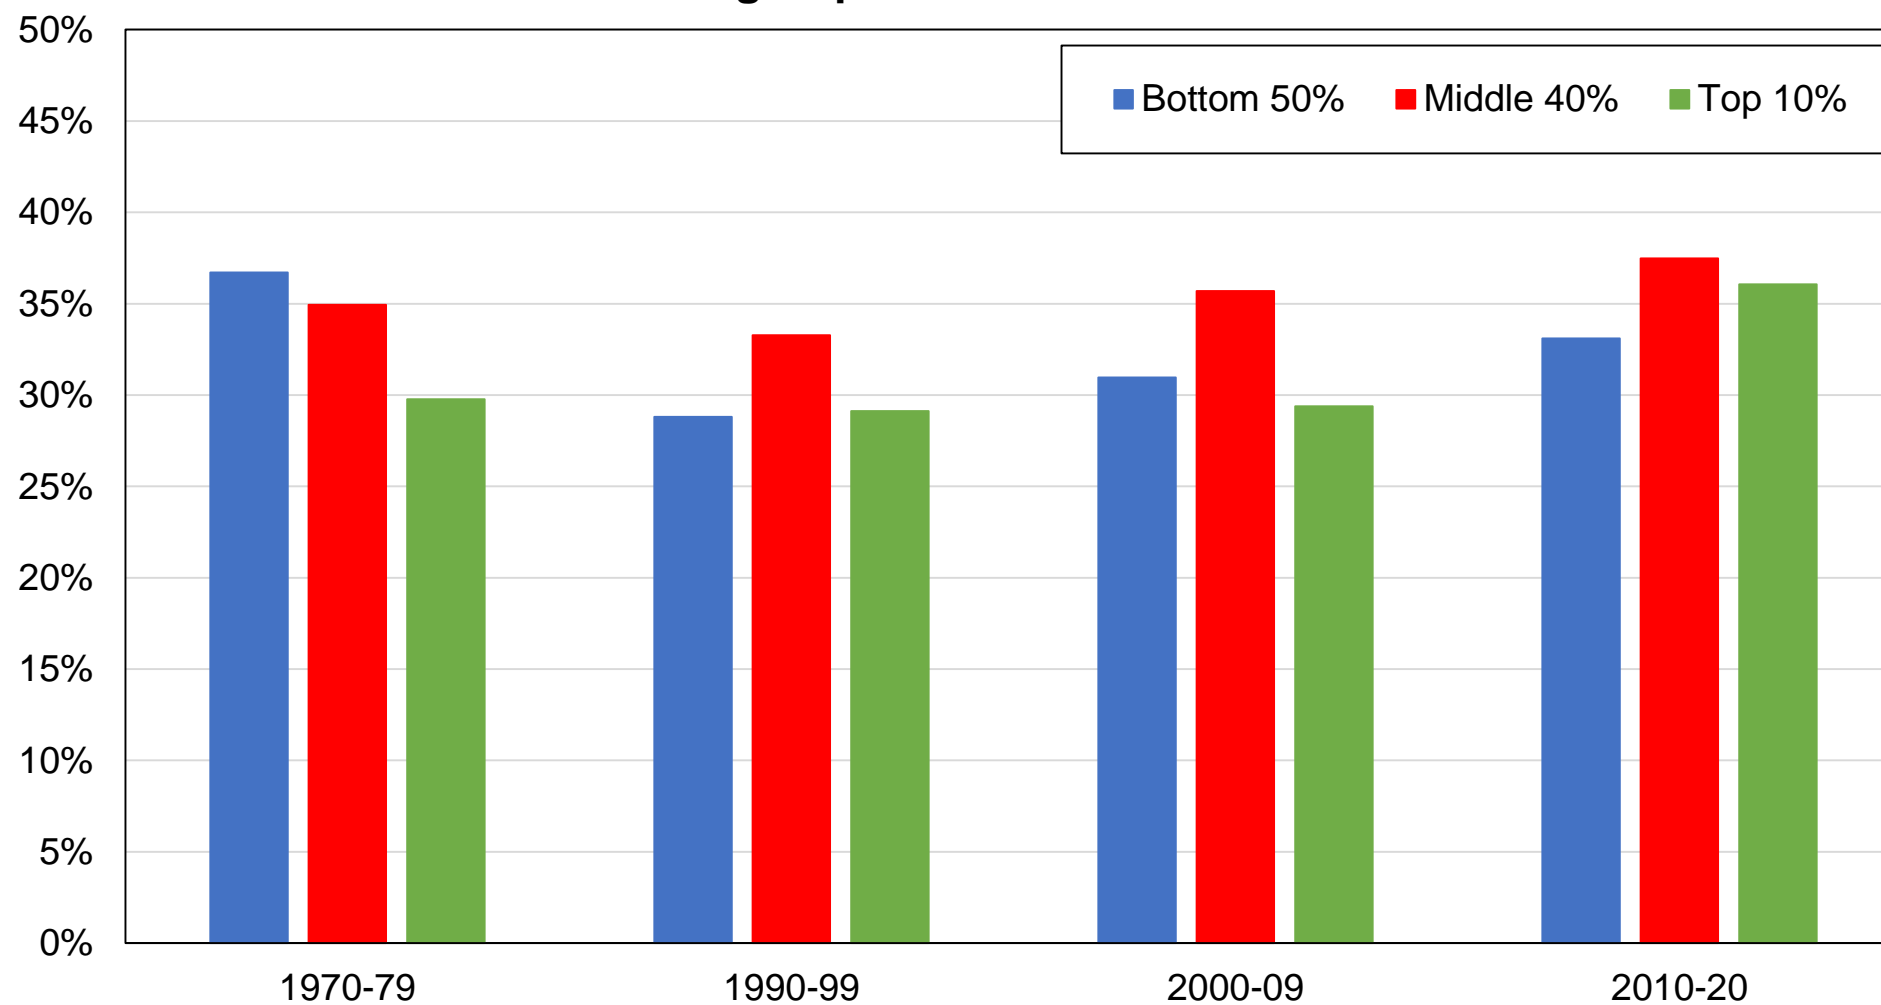

**Source:** authors' computations using Swiss political attitudes surveys.

**Note:** the figure shows the share of votes received by center-left / left-wing parties by income group.

**Figure EB20 - Vote for the Labour Party by income group in the United Kingdom**

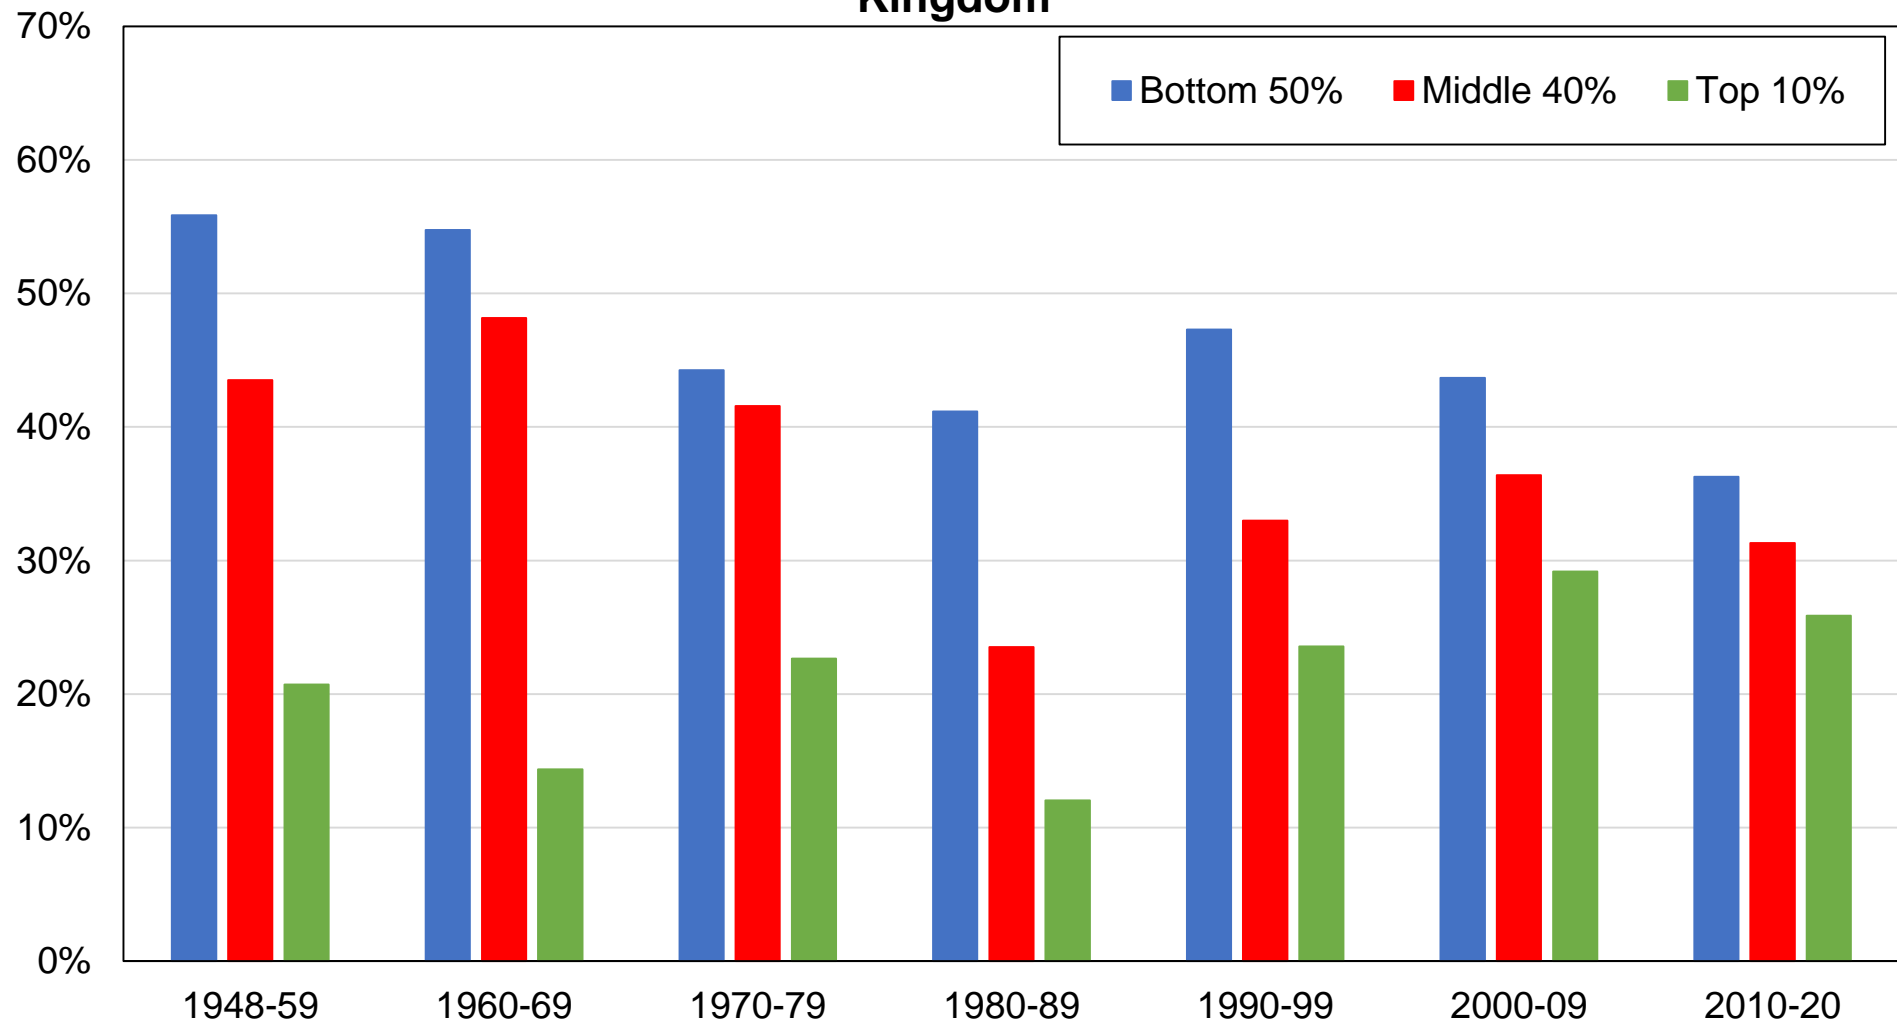

**Source:** authors' computations using British post-electoral surveys.

**Note:** the figure shows the share of votes received by the Labour Party by income group.

**Figure EB21 - Vote for the Democratic Party by income group in the United States**

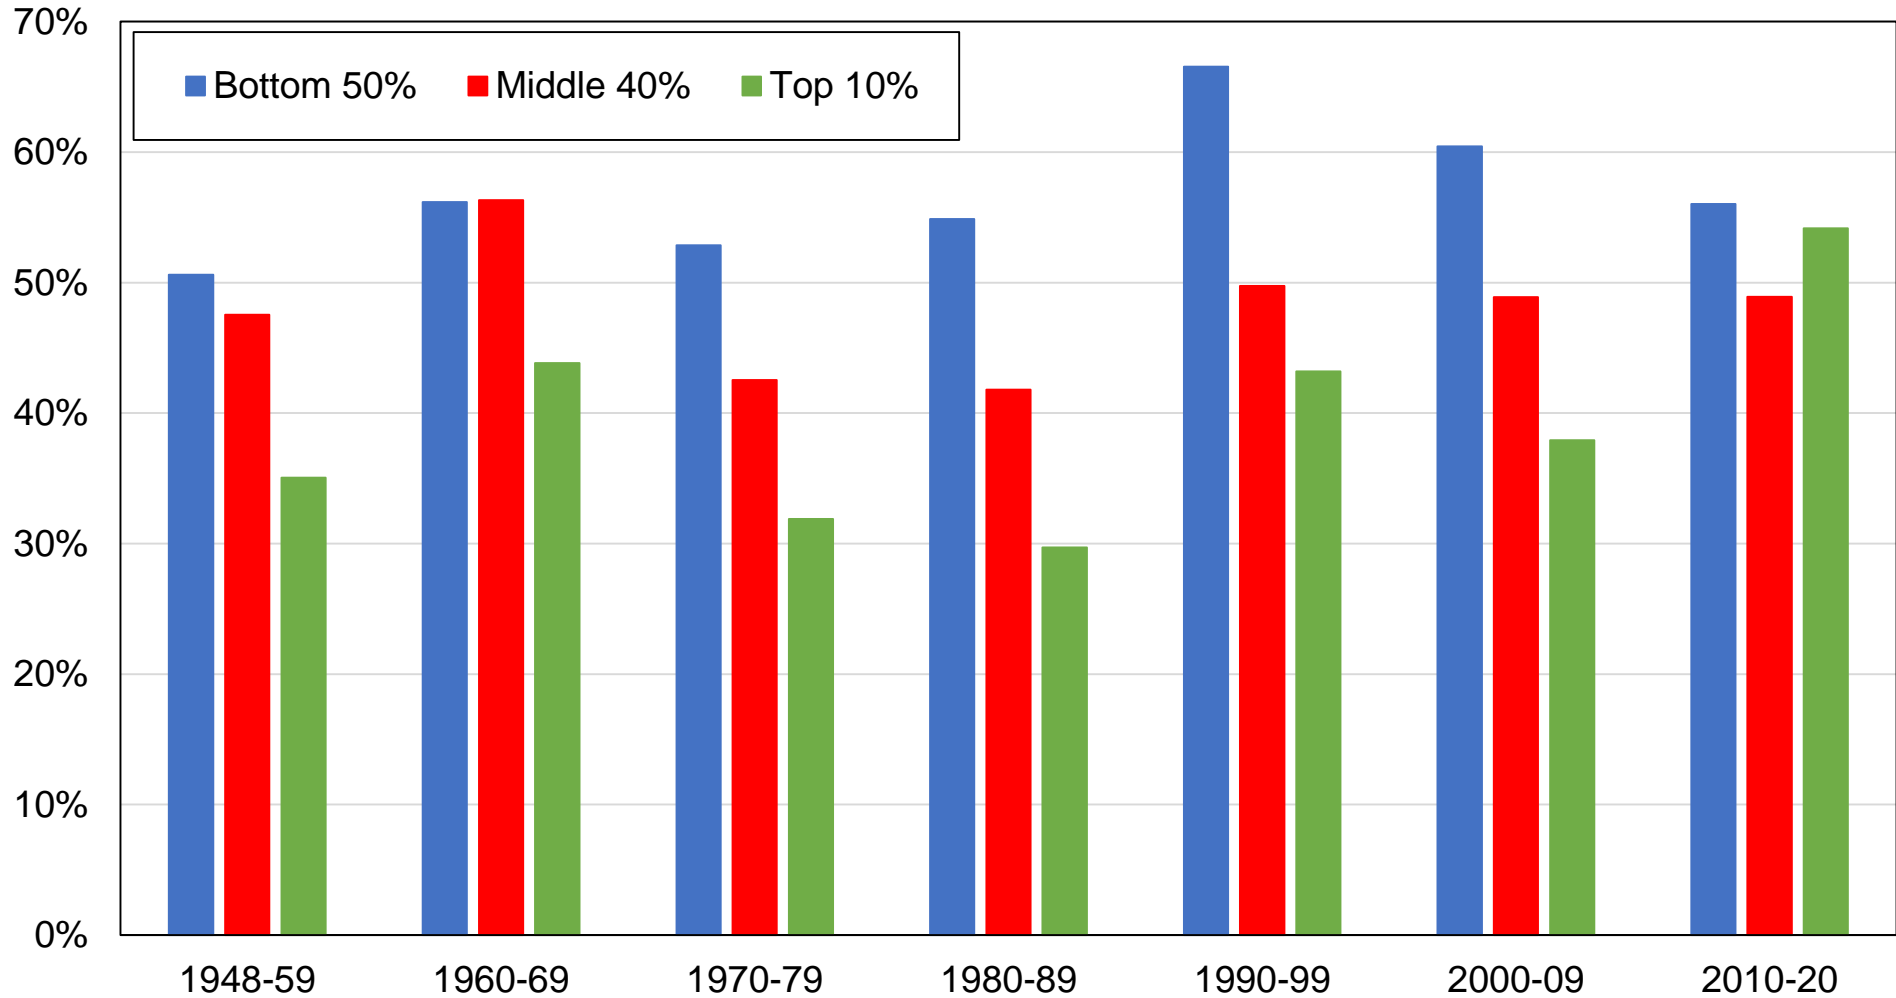

**Source:** authors' computations using US electoral surveys.

**Note:** the figure shows the share of votes received by the Democratic Party by income group.

**Figure EC1 - Vote for PS / PCF / Radicaux / Other left by income decile in France**

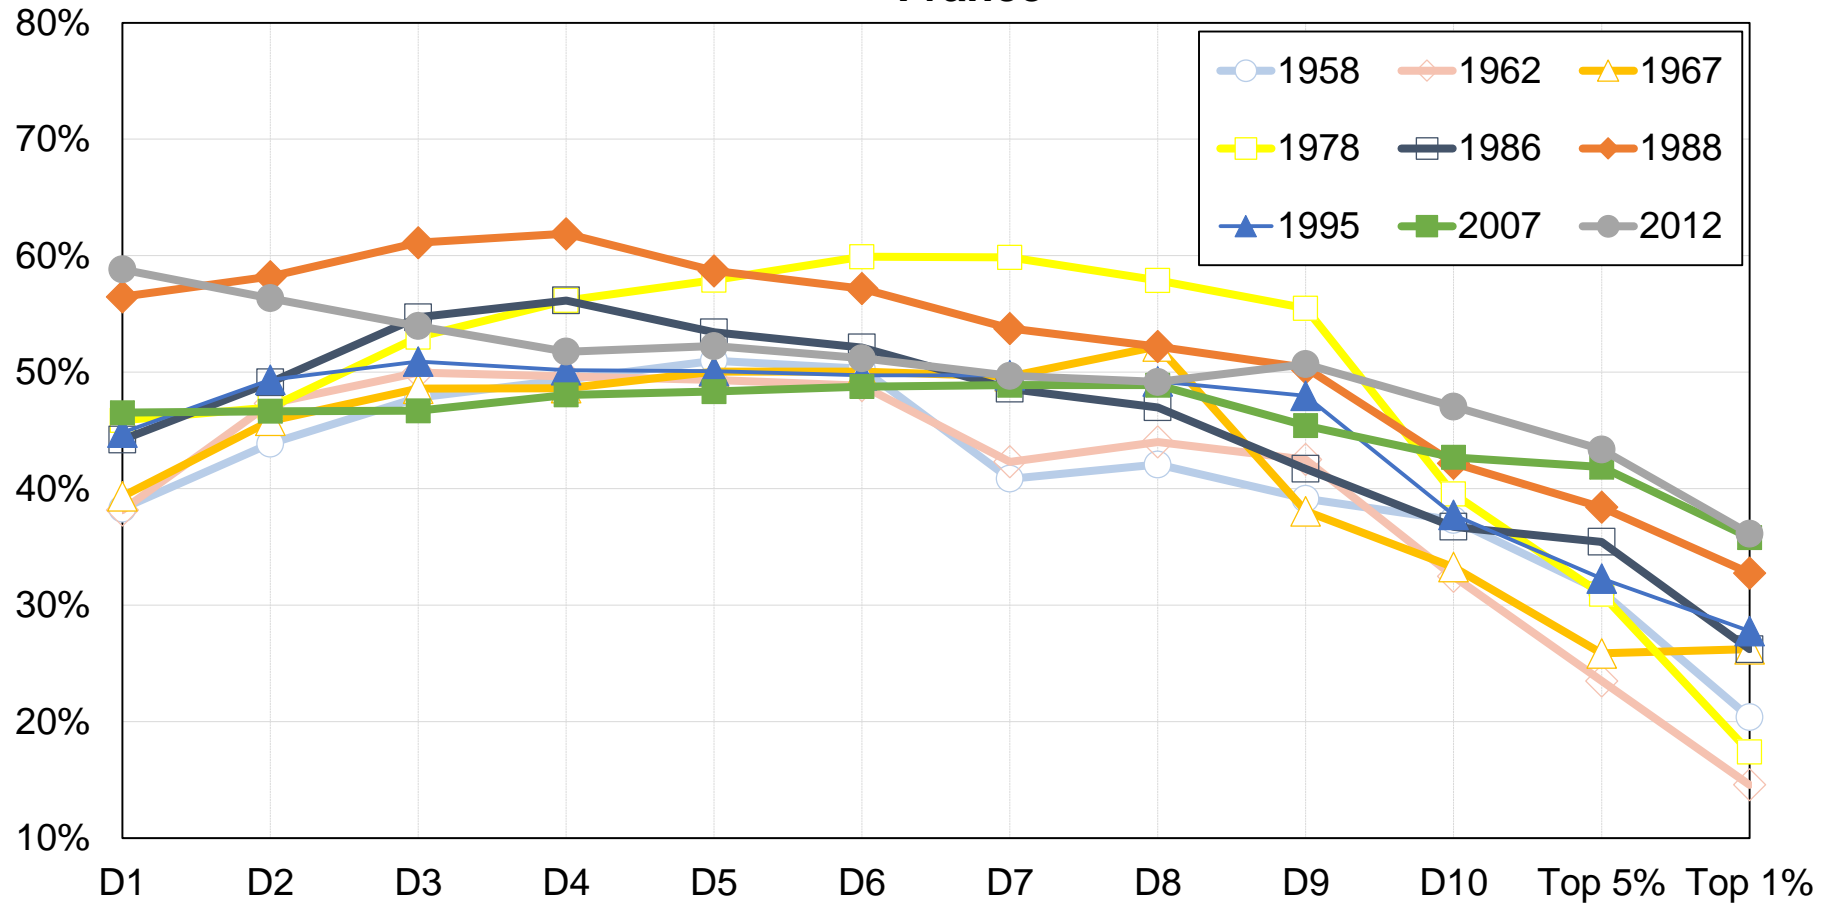

**Source:** authors' computations using French post-electoral surveys 1958-2012.

**Note:** in 1978, left-wing parties (PS, PCF, Radicaux, etc.) obtained 46% of the vote among voters with bottom 10% income, 23% of the vote among top 10% income voters, and 17% among the top 1%. Generally speaking, the profile of left-wing vote by income percentile is relatively flat within the bottom 90%, and strongly declining for the top 10%, especially at the beginning of the period.

**Figure EC2 - Vote for PS / PCF / Radicaux / Other left by wealth decile in France**

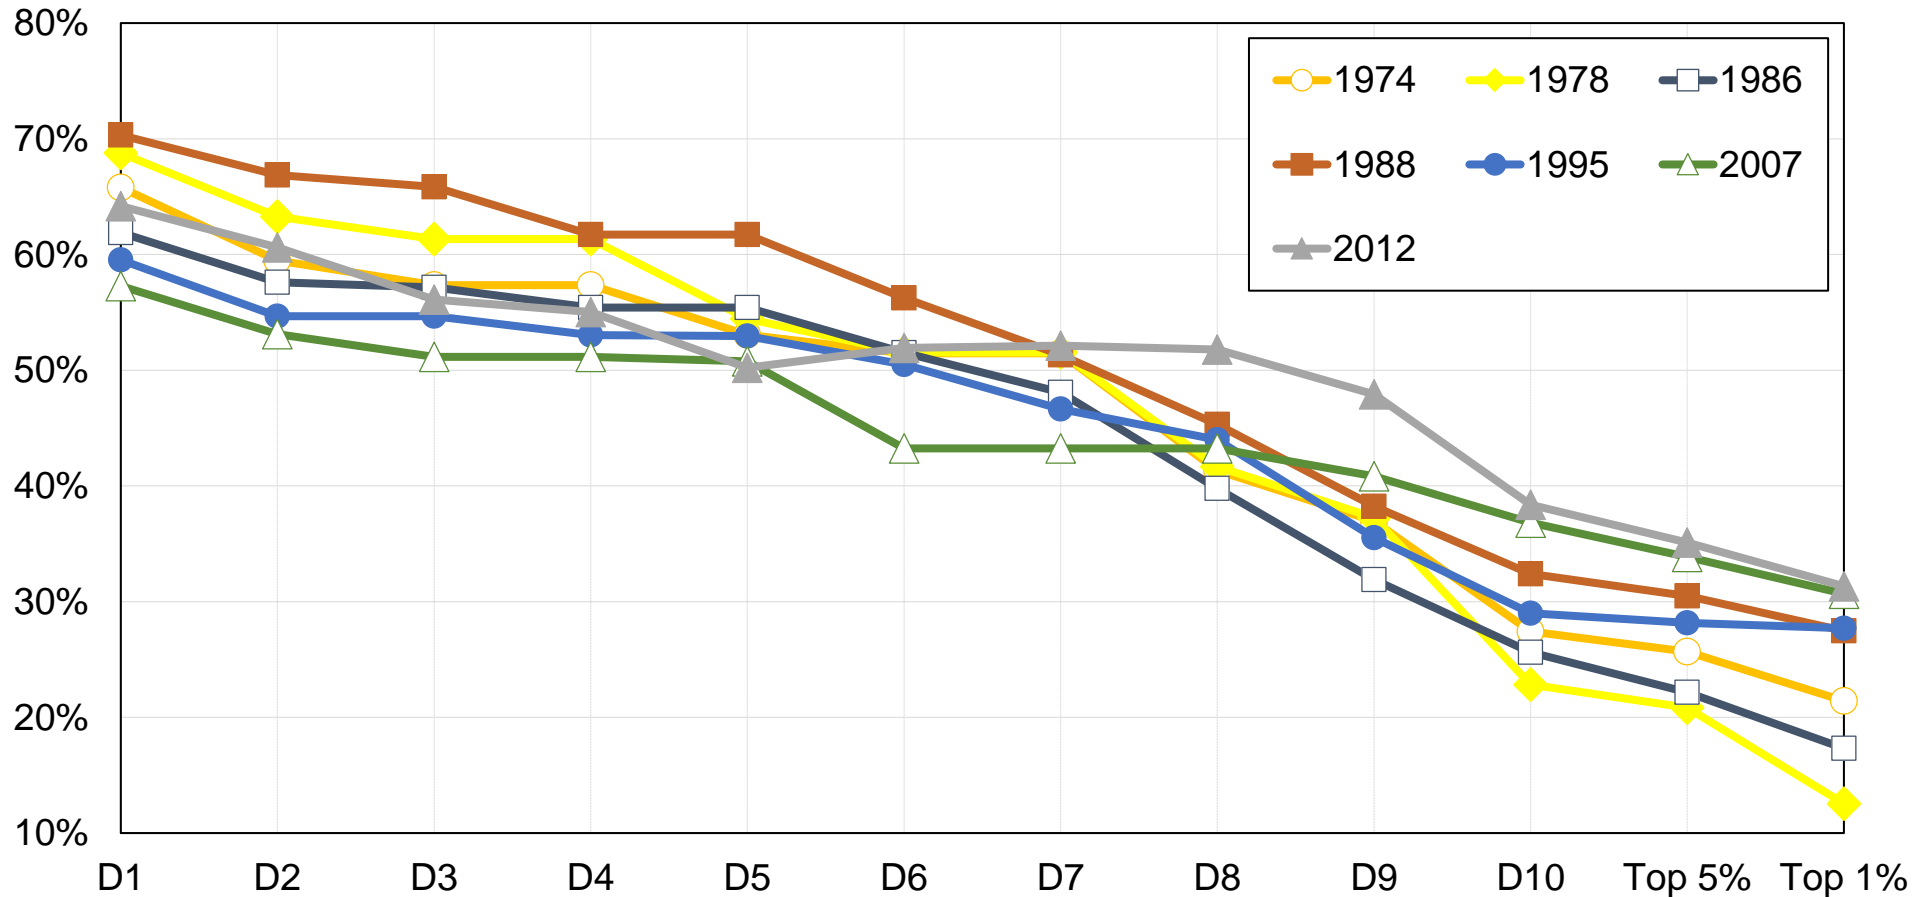

**Source:** authors' computations using French post-electoral surveys 1974-2012.

**Note:** in 1978, left-wing parties (PS, PCF, Radicaux, etc.) obtained 69% of the vote among voters with bottom 10% wealth, 23% of the vote among voters with top 10% wealth, and 13% among top 1% wealth holders. Generally speaking, the profile of left-wing vote by wealth percentile is strongly declining, all along the distribution, especially at the beginning of the period.
